# Supplementary material for: Understanding the tethered unhooking and rehooking of S2B in the reaction domain of FeMo-co, the active site of nitrogenase
Source: Royal Society of Chemistry journal article supplement (doi:10.1039/d2dt02571j), 2022-01-01
Supplement: d2dt02571j1.pdf [file d2dt02571j1.pdf]

## **Understanding the tethered unhooking and rehooking of S2B in the reaction domain of FeMo-co, the active site of nitrogenase**

Ian Dance

School of Chemistry

UNSW Sydney

Australia

### **Supplementary Information**

#### **Protein model**

The quantum computed protein model is an extract from crystal 3U7Q, shown in Chart 3. The six principal chains surrounding FeMo-co are highlighted with different colours, and the connecting hydrogen bonds are marked. Homocitrate, the His442 ligation of Mo, and relevant nearby water molecules are included (486 atoms total). Details, and the rationale for inclusion of amino acids and for truncation of uninvolved sidechains, are provided in the caption for Chart S1.

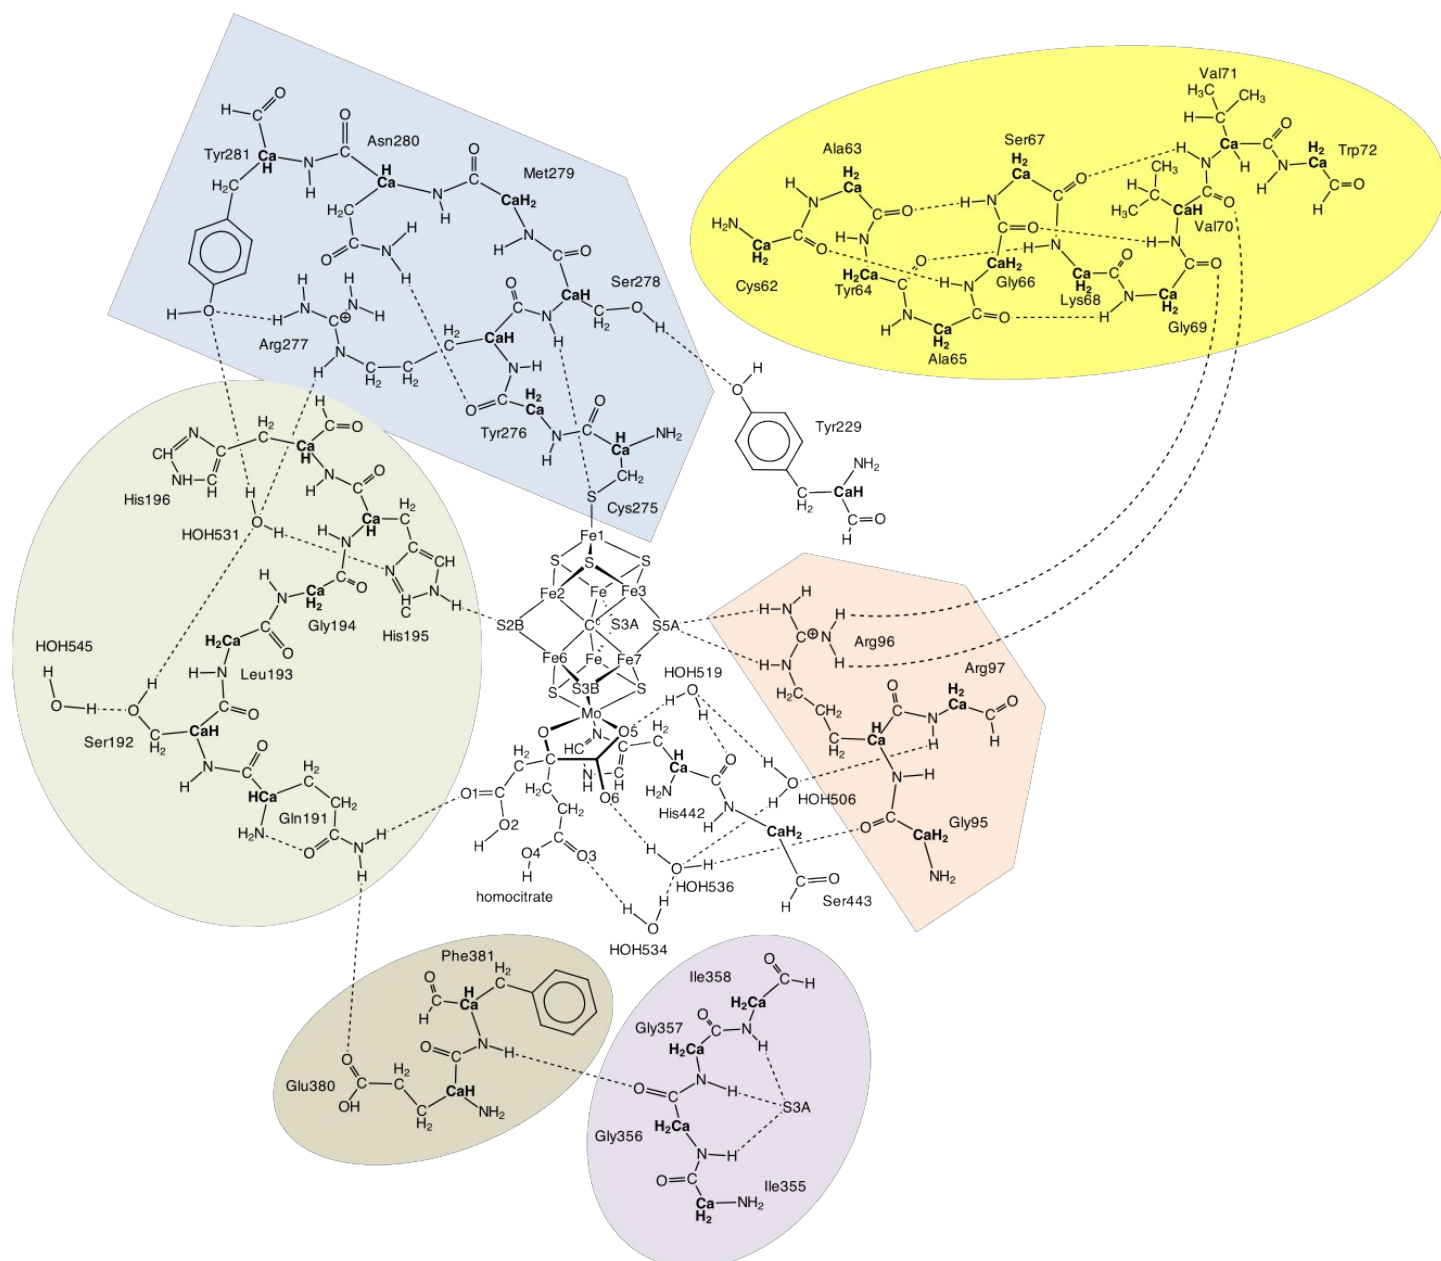

Chart S1. The quantum computed model, with residues and water molecules labelled according to *Azotobacter vinelandii* protein, crystal structure 3U7Q.  $\text{Ca}$  are labelled as Ca, and hydrogen bonds are broken lines. Non-influential sidechains are truncated to gly. In the ‘front’ chain (yellow highlight) that extends over the Fe2Fe3Fe6Fe7 face of FeMo-co the crucial residues Val70 and Val71 are complete, while 62, 63, 64, 65 67, 68 and 72 are modelled as Gly. In the 191 to 196 chain (highlight green) the significant sidechains of Gln191, Ser193, His195 and His196 are complete. In the 275-281 chain (blue highlight) Cys275, Arg277, Ser278, Asn280, Tyr281 near the  $\text{N}_2$  pathway are complete: Tyr229 is included in full because it borders the reaction domain and has an important hydrogen bond with Ser278. In chain 95-97 (salmon highlight) the sidechain of Arg96 is included because it forms crucial hydrogen bonds with S5A, Gly69 and Val70: the sidechain of Arg97 is not nearby and is truncated to gly. In the rear chain (mauve highlight) with hydrogen bonds to S5A, Ile355 and Ile358 are truncated to gly. Glu380 and Phe381 (fawn highlight) are included in full. Ligand His442 is complete and Ser443 is truncated to gly. Homocitrate is complete. HOH531 has hydrogen bonds with two chains, Ser192, His195 and Arg277, Tyr281, and is part of the putative proton transfer from surface water (HOH545) to His195.<sup>1</sup>

The four penultimate waters of the proton wire<sup>2</sup> (HOH519, HOH506, HOH536 and HOH534) are included.

Experimental and computational studies are in general agreement that the redox level of the [CFe<sub>7</sub>MoS<sub>9</sub>] core of resting FeMo-co cluster is described by net charge -1,<sup>3-6</sup> and so the net charge for the complete model in Chart S1 is -2 (-1 when the His195 side chain is protonated).

### Constraints on the computed protein

Some constraints on the protein structure are required during optimization calculations, because the modelled protein is incomplete and the bonding and dispersion influences of the complete protein outside the computational model are absent. The modelled protein must also maintain flexibility sufficient to accommodate the coordination of N<sub>2</sub> and of H<sub>2</sub>, and the diffusion of these molecules to and from FeMo-co. The constraints used here involved the C $\alpha$  atoms at the ends of the modelled protein chains, allowing movement of the intermediate residues and all sidechains. The constraints maintained the crystallographic distances between C<sup>c</sup> at the centre of FeMo-co and the C $\alpha$  atoms of residues 62, 95, 97, 191, 196, 229, 281, 355, 358, 380, 381, 443, and included C<sup>c</sup> -- water distances. As previously explained<sup>7</sup> trial calculations on the modes of diffusion and coordination of N<sub>2</sub> / H<sub>2</sub> led to the conclusion that the front chain near Val70 should move about 1Å away from FeMo-co. This is consistent with experimental data on mutation of amino acid 70 with smaller and larger side chains.<sup>8-10</sup> Therefore the C $\alpha$ (Trp72)-C<sup>c</sup> distance was constrained to 14.1Å (13.08Å in the resting protein structure), and the C $\alpha$ (Val70)-C<sup>c</sup> distance to 8.6Å (7.22Å in the resting protein). The lengths of the hydrogen bonds between the backside water HOH531 and Arg277, Tyr281 and Ser192 (Chart S1) were also constrained.

### Density functional procedures

Density functional (DF) calculations use the DMol methodology of Delley,<sup>11-16</sup> with accurate DNP (double numerical plus polarisation) basis sets.<sup>14</sup> The real-space cutoff in the calculation of atomic basis sets was 9 au (4.76Å), which gives results within 0.1% of the limit for larger extensions of the basis sets. The gradient-corrected functional PBE<sup>17</sup> was used because validation tests demonstrate that it is more accurate than other commonly used functionals when used with DMol.<sup>18</sup> See ref<sup>7</sup> for results describing the accuracy with which the PBE/DMol method using numerical basis sets reproduces experimental enthalpy data on the binding of N<sub>2</sub>. A more extensive study of this set of experimental data using different basis sets and testing many density functionals is available.<sup>19</sup> The calculations were all-electron, spin-unrestricted, with no imposed symmetry. The conductor-like screening model (COSMO)<sup>20-22</sup> was used with a dielectric constant of 5. Constraints on interatomic distances used the Lagrange Multiplier Algorithm. Control of electronic states was via the input spin populations for Fe1, Fe3, Fe4, Fe5 and Fe7. Output spin populations are calculated by the Mulliken method.<sup>23</sup>

### Determination of transition states

The following pragmatic procedure is used to map reaction energy surfaces and locate transition states.<sup>24,25,26</sup> A chemically reasonable geometry between energy minima is evaluated by observing the directions and extent of geometry change during an energy minimisation calculation that is restricted to small (ca 0.03 Å) atom displacements at each cycle. This reveals significant geometrical variables (i.e. which atoms are moving, which bond distances and angles are changing) and also the energy gradients involved. This calculation also indicates the direction of the energy saddle relative the 'reactant' and 'product' minima. Then, as illustrated in Figure 5, a point  $\Delta 1$  that is a short distance along this first optimisation is selected, and from this structure an atomic arrangement (2 on Figure 5) on the other side of the saddle is found (by trial and error and chemical experience) and similarly evaluated with small-displacement energy minimisation steps. A point  $\Delta 2$  along the second optimisation is selected, and from this the key moving atoms are adjusted to be just back across the suspected saddle-point towards the 'reactant' state. Repetition of this cycle, with subsequent short small-step energy minimisations, always

starting from a point just on the other side of the barrier, allows the barrier to be straddled from opposing trial positions that progressively approach each other in geometry and energy, and converge at the transition state (TS). Confirmation of the TS is obtained by following the complete trajectory of geometries from positions nudged just away from the TS, linking the TS with the connected reactant and product energy minima on the same potential energy surface. The protocol requires human participation, which is itself insightful, and with chemical experience the procedure works efficiently. This method is valuable for the reactions involving FeMo-co where reaction trajectories can be multivariate, because the iterative procedure automatically optimizes all variables, including unrecognised variables that are not part of the principal bond-breaking and bond-making.

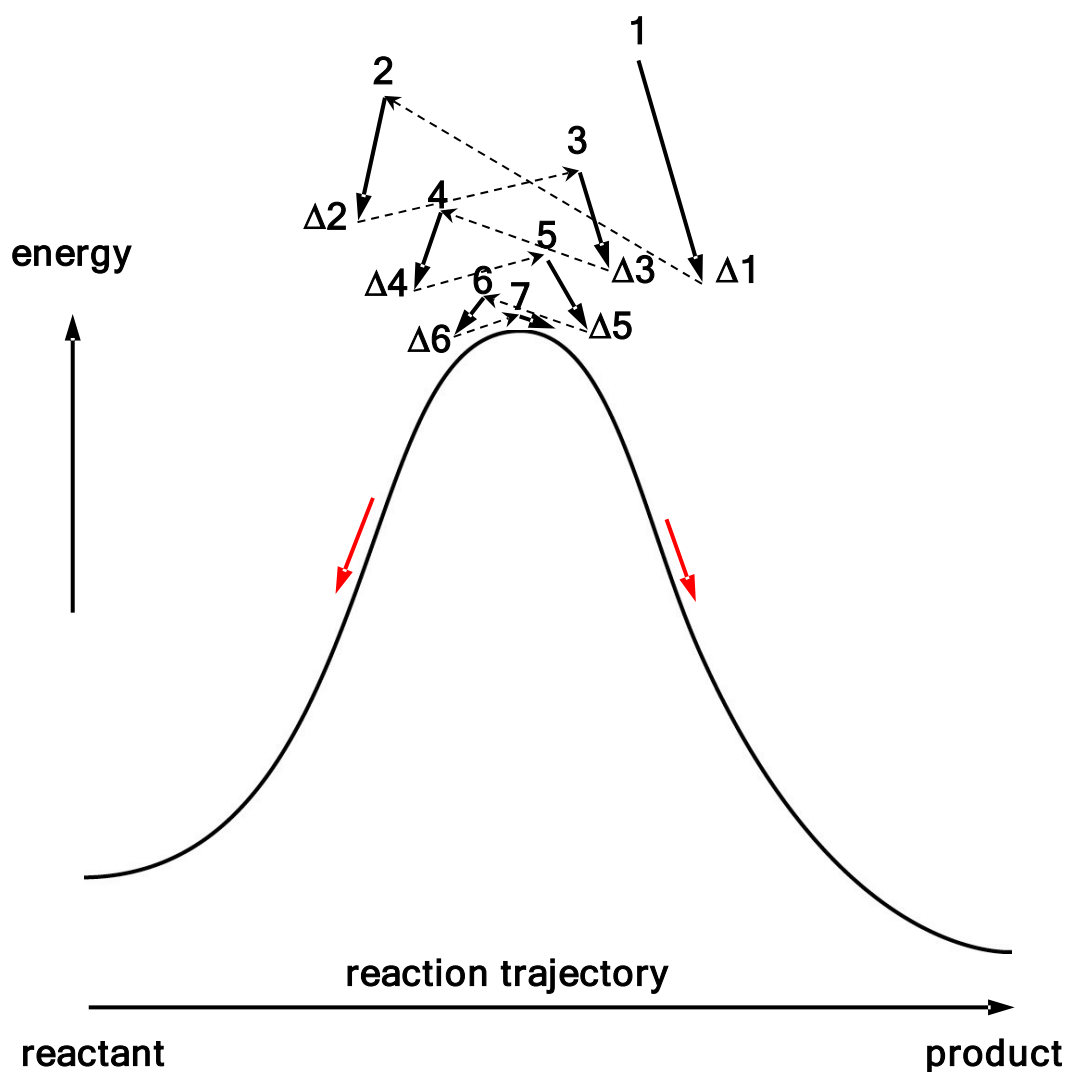

Figure 5. Generalised diagram of the procedure for locating a reaction transition state. The solid arrows represent the course of limited small-step energy reductions from the numbered positions, which are generated (broken arrows) from  $\Delta$  positions partway along the previous energy reduction, chosen according to geometry and energy gradient. The postulated trials necessarily oscillate across the barrier, and therefore optimise all other variables and decrease the energy and gradient while approaching the top of the barrier. Confirmation that the transition state, reactant and product are on the same potential energy surface is obtained by complete energy minimisations (red arrows).

## References

- 1 I. Dance, *Journal of Inorganic Biochemistry*, 2017, **169**, 32-43. 10.1016/j.jinorgbio.2017.01.005
- 2 I. Dance, *Dalton Transactions*, 2015, **44**, 18167-18186. 10.1039/C5DT03223G
- 3 T. Spatzal, J. Schlesier, E.-M. Burger, D. Sippel, L. Zhang, S. L. A. Andrade, D. C. Rees and O. Einsle, *Nat Commun*, 2016, **7**, 10902. 10.1038/ncomms10902
- 4 R. Bjornsson, F. Neese and S. DeBeer, *Inorganic Chemistry*, 2017, **56**, 1470-1477. 10.1021/acs.inorgchem.6b02540
- 5 B. Benediktsson and R. Bjornsson, *Inorganic Chemistry*, 2017, **56**, 13417-13429. 10.1021/acs.inorgchem.7b02158
- 6 I. Dance, *Chembiochem*, 2020, **21**, 1671-1709. 10.1002/cbic.201900636
- 7 I. Dance, *Dalton Transactions*, 2021, **50**, 18212-18237. 10.1039/d1dt03548g.
- 8 P. C. Dos Santos, R. Igarashi, H.-I. Lee, B. M. Hoffman, L. C. Seefeldt and D. R. Dean, *Acc. Chem. Res.*, 2005, **38**, 208-214.
- 9 L. C. Seefeldt, B. M. Hoffman and D. R. Dean, *Annu. Rev. Biochem.*, 2009, **78**, 701-722.
- 10 R. Sarma, B. M. Barney, S. Keable, D. R. Dean, L. C. Seefeldt and J. W. Peters, *J. Inorg. Biochem.*, 2010, **104**, 385-389.
- 11 B. Delley, *J. Chem. Phys.*, 1990, **92**, 508-517.
- 12 B. Delley, in *Modern density functional theory: a tool for chemistry*, eds. J. M. Seminario and P. Politzer, Elsevier, Amsterdam, 1995, p. 221-254
- 13 J. Baker, A. Kessi and B. Delley, *The Journal of Chemical Physics*, 1996, **105**, 192-212. doi:<http://dx.doi.org/10.1063/1.471864>
- 14 B. Delley, *J. Chem. Phys.*, 2000, **113**, 7756-7764.
- 15 J. Andzelm, R. D. King-Smith and G. Fitzgerald, *Chemical Physics Letters*, 2001, **335**, 321-326. [http://dx.doi.org/10.1016/S0009-2614\(01\)00030-6](http://dx.doi.org/10.1016/S0009-2614(01)00030-6)
- 16 T. Todorova and B. Delley, *The Journal of Physical Chemistry C*, 2010, **114**, 20523-20530. 10.1021/jp1049759
- 17 J. P. Perdew, K. Burke and M. Ernzerhof, *Phys. Rev. Lett.*, 1996, **77**, 3865-3868.
- 18 I. Dance, *Molecular Simulation*, 2018, **44**, 568-581. doi.org/10.1080/08927022.2017.1413711
- 19 M. Torbjörnsson and U. Ryde, *Electronic Structure*, 2021, **3**, 034005. 10.1088/2516-1075/ac1a63
- 20 J. Andzelm, C. Kolmel and A. Klamt, *J. Chem. Phys.*, 1995, **103**, 9312-9320.
- 21 A. Klamt, V. Jonas, T. Burger and J. C. W. Lohrenz, *J. Phys. Chem. A*, 1998, **102**, 5074-5085.
- 22 B. Delley, *Molecular Simulation*, 2006, **32**, 117-123.
- 23 R. S. Mulliken, *J. Chem. Phys.*, 1955, **23**, 1833-1846.
- 24 I. Dance, *Molecular Simulation*, 2008, **34**, 923-929.
- 25 I. Dance, *Molecular Simulation*, 2011, **37**, 257.

### Table S1. Energies and spin populations.

The entries are identified by the number in Scheme 1, with ‘u’ appended when unhooked, and with a parenthetical letter (ranked by energy) when needed to differentiate electronic and spin states.

| Structure   | electronic state(S) | relative energy<br>kcal mol <sup>-1</sup> | spin populations |      |       |      |       |      |      |
|-------------|---------------------|-------------------------------------------|------------------|------|-------|------|-------|------|------|
|             |                     |                                           | Fe1              | Fe2  | Fe3   | Fe4  | Fe5   | Fe6  | Fe7  |
| <b>1(a)</b> | 35(2)               | 0.0                                       | 3.23             | 0.09 | -2.67 | 2.80 | -2.46 | 0.25 | 2.28 |

|                           |         |      |      |       |       |       |       |       |       |
|---------------------------|---------|------|------|-------|-------|-------|-------|-------|-------|
| <b>1(b)</b>               | 35(1)   | 0.3  | 1.75 | -0.01 | -2.55 | 2.69  | -2.47 | 0.18  | 2.32  |
| <b>1(c)</b>               | 35(1)   | 5.3  | 3.21 | -0.12 | -2.73 | 2.80  | -2.51 | -0.62 | 1.33  |
| <b>1(d)</b>               | 35(0)   | 2.9  | 1.70 | -0.19 | -2.68 | 2.58  | -2.51 | -0.59 | 1.50  |
| <b>1(e)</b>               | 47(1)   | 5.1  | 3.12 | 0.19  | 1.81  | -2.63 | 2.38  | -1.04 | -2.21 |
| <b>2(a)</b>               | 47(2)   | 0.0  | 3.19 | 0.16  | 2.77  | -2.58 | 2.44  | -0.15 | -2.33 |
| <b>2(b)</b>               | 35(1)   | 0.8  | 1.83 | -0.02 | -2.61 | 2.55  | -2.42 | 0.23  | 2.35  |
| <b>3(a)</b>               | 35(1)   | 0.0  | 1.75 | -0.02 | -2.59 | 2.61  | -2.43 | 0.24  | 2.33  |
| <b>3(b)</b>               | 47(2)   | 0.7  | 3.19 | 0.17  | 2.77  | -2.59 | 2.45  | -0.16 | -2.33 |
| <b>4u(a)</b>              | 35(3/2) | 0.0  | 3.10 | 0.28  | -2.65 | 2.73  | -2.48 | -0.85 | 2.33  |
| <b>4u(b)</b>              | 47(3/2) | 1.0  | 3.03 | 0.11  | 1.85  | -2.56 | 2.49  | 0.06  | -2.07 |
| <b>5u(a)</b>              | 47(3/2) | 0.0  | 2.94 | -1.56 | 2.75  | -2.59 | 2.40  | 1.02  | -2.26 |
| <b>5u(b)</b>              | 35(3/2) | 0.3  | 2.92 | -1.12 | -1.97 | 2.90  | -2.28 | -0.86 | 2.37  |
| <b>6<sup>-2</sup>(a)</b>  | 47(5/2) | 9.6  | 3.17 | 0.29  | 2.92  | -2.36 | 2.41  | 0.49  | -2.30 |
| <b>6<sup>-2</sup>(b)</b>  | 35(3/2) | 10.3 | 3.20 | -0.08 | -2.81 | 2.57  | -2.39 | -0.47 | 2.28  |
| <b>6<sup>-2</sup>(c)</b>  | 35(1/2) | 9.2  | 3.20 | -0.25 | -2.83 | 2.68  | -2.51 | -1.62 | 1.77  |
| <b>6<sup>-2</sup>(d)</b>  | 47(1/2) | 14.5 | 3.11 | 0.09  | 0.96  | -2.58 | 2.49  | -1.14 | -2.31 |
| <b>6<sup>-2</sup>u(a)</b> | 35(1/2) | 0.0  | 2.97 | -1.31 | -2.54 | 2.85  | -2.35 | -1.57 | 2.37  |
| <b>6<sup>-2</sup>u(b)</b> | 35(3/2) | 2.2  | 2.93 | -1.23 | -2.43 | 2.94  | -2.46 | 0.36  | 2.22  |
| <b>6<sup>-2</sup>u(c)</b> | 47(3/2) | 1.4  | 2.92 | -1.56 | 2.74  | -2.61 | 2.35  | 1.09  | -2.29 |
| <b>6<sup>-2</sup>u(d)</b> | 47(1/2) | 4.8  | 2.87 | -1.58 | 2.65  | -2.71 | 2.53  | -0.89 | -2.09 |
| <b>6<sup>-1</sup></b>     | 35(1)   | 2.4  | 3.17 | -0.15 | -2.78 | 2.60  | -2.39 | -1.32 | 2.28  |
| <b>6<sup>-1</sup>u</b>    | 35(1)   | 0.0  | 2.85 | -0.96 | -2.19 | 2.87  | -2.35 | -1.11 | 2.29  |
| <b>7</b>                  | 35(2)   | 1.1  | 3.14 | -0.18 | -2.50 | 2.94  | -2.45 | 0.19  | 2.25  |
| <b>7u(a)</b>              | 47(1)   | 0.0  | 2.87 | -2.00 | 2.58  | -2.64 | 2.17  | 1.17  | -2.32 |
| <b>7u(b)</b>              | 35(2)   | 2.1  | 3.10 | 0.67  | -2.53 | 2.81  | -2.36 | -0.55 | 2.35  |
| <b>8</b>                  | 47(1)   | 0.0  | 2.96 | -1.79 | 2.91  | -2.56 | 2.35  | -0.14 | -2.26 |
| <b>8u(a)</b>              | 47(1)   | 3.7  | 2.84 | -0.79 | 2.89  | -2.28 | 2.47  | -1.67 | -2.00 |
| <b>8u(b)</b>              | 47(2)   | 5.7  | 2.91 | -1.39 | 2.87  | -2.34 | 2.29  | 1.66  | -2.44 |
| <b>9<sup>-1</sup>(a)</b>  | 35(1)   | 0.0  | 3.20 | -0.11 | -2.77 | 2.70  | -2.37 | -1.52 | 2.30  |
| <b>9<sup>-1</sup>(b)</b>  | 47(1)   | 5.5  | 2.93 | -1.44 | 2.50  | -2.75 | 2.47  | -0.05 | -2.10 |
| <b>9<sup>-1</sup>u</b>    | 35(1)   | 4.6  | 2.88 | -1.03 | -2.23 | 2.91  | -2.37 | -0.97 | 2.24  |
| <b>9<sup>-2</sup>(a)</b>  | 35(3/2) | 0.0  | 3.20 | -0.02 | -2.82 | 2.59  | -2.46 | -0.61 | 2.21  |
| <b>9<sup>-2</sup>(b)</b>  | 47(3/2) | 3.9  | 3.16 | 0.17  | 2.84  | -2.68 | 2.45  | -1.43 | -2.23 |
| <b>10</b>                 | 47(2)   | 0.0  | 3.14 | 0.31  | 2.50  | -2.69 | 2.48  | 0.31  | -2.31 |
| <b>10u</b>                | 47(2)   | 1.4  | 2.85 | -1.30 | 2.77  | -2.45 | 2.33  | 1.35  | -2.28 |

|               |         |      |      |       |       |       |       |       |       |
|---------------|---------|------|------|-------|-------|-------|-------|-------|-------|
| <b>11</b>     | 35(1)   | 0.0  | 3.20 | -0.13 | -2.78 | 2.69  | -2.38 | -1.41 | 2.30  |
| <b>11u</b>    | 35(1)   | 6.0  | 2.93 | -1.13 | -2.27 | 2.94  | -2.40 | -0.87 | 2.26  |
| <b>12</b>     | 35(1)   | 10.8 | 3.10 | -0.42 | -2.63 | 2.44  | -2.40 | -0.78 | 2.24  |
| <b>12u</b>    | 35(1)   | 0.0  | 2.88 | -0.67 | -2.41 | 2.78  | -2.29 | -1.31 | 2.38  |
| <b>13(a)</b>  | 47(2)   | 9.8  | 2.92 | -0.94 | 2.93  | -2.23 | 2.54  | 0.29  | -2.04 |
| <b>13(b)</b>  | 35(1)   | 13.2 | 3.11 | -0.53 | -2.62 | 2.45  | -2.38 | -0.77 | 2.25  |
| <b>13u(a)</b> | 47(1)   | 0.1  | 2.75 | -1.55 | 2.79  | -2.43 | 2.33  | 0.10  | -2.25 |
| <b>13u(b)</b> | 47(2)   | 0.0  | 2.84 | -1.56 | 2.75  | -2.43 | 2.41  | 2.04  | -2.20 |
| <b>14(a)</b>  | 35(2)   | 11.7 | 3.14 | 0.44  | -2.31 | 2.92  | -2.56 | 0.10  | 2.16  |
| <b>14(b)</b>  | 47(2)   | 9.6  | 2.94 | -0.88 | 2.94  | -2.20 | 2.49  | 0.31  | -2.09 |
| <b>14u(a)</b> | 47(2)   | 0.0  | 2.86 | -1.63 | 2.79  | -2.49 | 2.41  | 1.85  | -2.07 |
| <b>14u(b)</b> | 35(2)   | 7.0  | 3.11 | 1.56  | -2.55 | 2.73  | -2.42 | -1.20 | 2.39  |
| <b>15(a)</b>  | 47(3/2) | 0.0  | 2.97 | -2.14 | 2.89  | -2.41 | 2.58  | 0.58  | -1.87 |
| <b>15(b)</b>  | 35(3/2) | 4.6  | 3.17 | 1.06  | -2.65 | 2.81  | -2.65 | -0.78 | 1.63  |

### Atomic coordinates and Fe spin populations

Translation of Fe numbering

Fe1 = Fe143

Fe2 = Fe140

Fe3 = Fe141

Fe4 = Fe142

Fe5 = Fe139

Fe6 = Fe145

Fe7 = Fe144

| structure, spin densities | filename, coordinates                     |
|---------------------------|-------------------------------------------|
| <b>1(a)</b>               | bm2cnx2b6x2hn2n2x35.car_2                 |
| Fe( 139) 0.541 2.342      | C1 -8.270633891 -4.499431666 0.280032710  |
| Fe( 140) 0.435 -1.635     | C2 -8.446713775 -5.731825478 -0.614616237 |
| Fe( 141) 0.582 2.882      | C3 -9.264735974 -2.394606990 1.064881679  |
| Fe( 142) 0.555 -2.602     | C4 -9.055599227 -2.539216757 2.571013957  |
| Fe( 143) 0.563 2.927      | C5 -9.422144808 -3.868018793 4.585756382  |
| Fe( 144) 0.503 -2.193     | C6 -7.971284648 -4.180780944 4.970678326  |
| Fe( 145) 0.466 -0.209     | C7 -5.824208506 -5.110305924 4.245523595  |
| S=2                       | C8 -4.962322861 -3.849333197 4.122833912  |
|                           | C9 -4.529989325 -1.763611539 2.935493864  |
|                           | C10 -4.724042575 -0.780848475 4.100531885 |
|                           | C11 -6.221565072 0.151294666 5.775025811  |
|                           | C12 -5.656454058 -0.361504420 7.106363105 |
|                           | C13 -5.581510116 -2.212702351 8.709750713 |
|                           | C14 -4.170284258 -2.774237749 8.914545295 |
|                           | C15 -2.252249976 -3.930666773 7.902566914 |
|                           | C16 -1.070220453 -3.156909778 7.311259406 |
|                           | C17 -0.405013995 -1.196675424 5.948352451 |
|                           | C18 -0.301850566 0.208105661 6.568962253  |

|     |              |               |              |
|-----|--------------|---------------|--------------|
| C19 | -0.664167212 | -1.187886922  | 4.417271866  |
| C20 | 0.245467223  | -0.200702336  | 3.678895019  |
| C21 | -0.514825036 | -2.598806645  | 3.837412189  |
| C22 | -1.451571219 | 2.315511925   | 7.133387682  |
| C23 | -1.587046558 | 2.258801056   | 8.668470351  |
| C24 | -2.533803938 | 3.200106978   | 6.469001376  |
| C25 | -2.636492413 | 4.562182272   | 7.165417743  |
| C26 | -2.241696194 | 3.382450356   | 4.974171814  |
| C27 | -2.810510162 | 1.456518901   | 10.606017837 |
| C28 | -1.565338343 | 1.066806675   | 11.378957862 |
| C29 | 3.921018376  | -11.075339905 | 6.483099254  |
| C30 | 4.691282617  | -9.994429945  | 5.724615843  |
| C31 | 5.261809371  | -7.560527589  | 5.782566881  |
| C32 | 6.357626058  | -7.158097449  | 6.789481626  |
| C33 | 4.223564284  | -6.440151595  | 5.593502721  |
| C34 | 4.827095522  | -5.135349072  | 5.070120955  |
| C35 | 3.743379229  | -4.158516084  | 4.618382866  |
| C36 | 3.968760142  | -1.694420106  | 4.230223527  |
| C37 | 8.713143871  | -6.546949686  | 7.064025064  |
| C38 | 9.134219888  | -5.098430973  | 6.942457705  |
| C39 | -5.164752224 | -2.281497751  | -2.024172038 |
| C40 | -5.458022771 | -0.775814297  | -1.915113473 |
| C41 | -3.655884658 | -2.487717122  | -1.751805751 |
| C42 | -3.204362622 | -3.943305641  | -1.513591151 |
| C43 | -2.795175353 | -4.713593239  | -2.768693576 |
| C44 | -5.778497068 | 1.270600330   | -3.231082204 |
| C45 | -7.123283673 | 1.870640842   | -2.797111482 |
| C46 | -5.389656699 | 1.762604837   | -4.639268931 |
| C47 | -9.250141603 | 1.463017157   | -1.646536702 |
| C48 | -9.017657626 | 1.698499880   | -0.146013759 |
| C49 | -7.483026379 | 1.420398203   | 1.760052289  |
| C50 | -6.361324089 | 2.421230845   | 2.043332347  |
| C51 | -4.469400264 | 3.742303536   | 1.222400856  |
| C52 | -4.981580679 | 5.142938055   | 1.639632124  |
| C53 | -3.640092160 | 3.989016037   | -0.048382041 |
| C54 | -2.925161158 | 2.824736090   | -0.654800668 |
| C55 | -2.456806426 | 1.631121617   | -0.165273155 |
| C56 | -1.811999452 | 1.787563962   | -2.288048073 |
| C57 | -6.631192611 | 6.890393678   | 1.072577775  |
| C58 | -6.928200863 | 7.267103725   | 2.522190189  |
| C59 | -7.918859295 | 6.947924959   | 0.218334578  |
| C60 | -8.346764172 | 8.306159861   | -0.255016006 |
| C61 | -8.376909004 | 9.524214239   | 0.396803819  |
| C62 | -9.138433718 | 9.736324240   | -1.673952737 |
| C63 | 8.157457240  | 1.194911351   | 5.258505587  |
| C64 | 8.957654730  | -0.079360242  | 5.450566687  |
| C65 | 6.750839405  | 0.771882806   | 4.764384306  |
| C66 | 5.816223104  | 1.944361941   | 4.581188034  |
| C67 | 5.011826532  | 2.411567628   | 5.637937162  |
| C68 | 5.733101816  | 2.611491433   | 3.345765956  |
| C69 | 4.151015468  | 3.501952775   | 5.468500030  |
| C70 | 4.886267618  | 3.706367711   | 3.163861469  |
| C71 | 4.093182058  | 4.148131776   | 4.226704909  |
| C72 | 6.407816434  | 6.457049799   | -1.099846376 |
| C73 | 5.505486662  | 7.513198443   | -1.749218657 |
| C74 | 5.571238097  | 5.251542634   | -0.650823501 |
| C75 | 4.898716303  | 8.674400378   | -3.830606216 |
| C76 | 3.450581804  | 8.264351096   | -4.108408318 |
| C77 | 1.800396270  | 6.425469213   | -4.102390000 |
| C78 | 0.978581316  | 6.485629332   | -2.796370999 |
| C79 | 1.891641740  | 5.003558272   | -4.685544456 |



|       |              |               |              |
|-------|--------------|---------------|--------------|
| C80   | 0.576864171  | 4.274243302   | -4.979265871 |
| C81   | -0.272617202 | 4.799858412   | -6.151080620 |
| C82   | -1.525414096 | 6.957892188   | -6.223874896 |
| C83   | 0.926412550  | 6.284070891   | -0.367537549 |
| C84   | 0.828339678  | 7.710947872   | 0.205729185  |
| C85   | 1.533728298  | 5.369182818   | 0.707123818  |
| C86   | 2.048342912  | 9.787532294   | 0.628193669  |
| C87   | 1.560186935  | 11.121561843  | 0.071627281  |
| C88   | 0.420565295  | 12.327509413  | -1.745968797 |
| C89   | -0.922304090 | 12.909947390  | -1.256977286 |
| C90   | 0.424463848  | 12.162044123  | -3.280846506 |
| C91   | -0.604122726 | 11.138415357  | -3.748806632 |
| C92   | -3.021317405 | 12.467686535  | -0.058310952 |
| C93   | -2.975619692 | 13.637434055  | 0.918595688  |
| C94   | -3.720953461 | 11.251741701  | 0.604710638  |
| C95   | -3.917474384 | 10.110434044  | -0.367897887 |
| C96   | -5.022117976 | 10.098230616  | -1.233193909 |
| C97   | -2.975841164 | 9.073760233   | -0.477516492 |
| C98   | -5.176942744 | 9.097669244   | -2.194467481 |
| C99   | -3.100010069 | 8.078529453   | -1.451586992 |
| C100  | -4.201319888 | 8.106918599   | -2.304054951 |
| C101  | 5.121126795  | -5.241592042  | -7.767206487 |
| C102  | 3.670045165  | -4.867577440  | -7.511870868 |
| C103  | 2.166313960  | -3.126524420  | -6.574334217 |
| C104  | 1.825301568  | -1.839332908  | -7.336668916 |
| C105  | 2.298756386  | 0.555858390   | -7.529464754 |
| C106  | 3.494968637  | 1.501257388   | -7.566224577 |
| C107  | 5.773086145  | 2.042244323   | -6.847678641 |
| C108  | 6.859348517  | 1.714124985   | -7.853180473 |
| C109  | -1.496526047 | -4.493286417  | -8.978924168 |
| C110  | -2.478325555 | -3.315205748  | -8.968123824 |
| C111  | -1.296330408 | -4.998915483  | -7.531113197 |
| C112  | -0.651925413 | -6.397363243  | -7.502556739 |
| C113  | -0.181899749 | -6.734912236  | -6.105358120 |
| C114  | -2.825443245 | -0.928081131  | -8.585174812 |
| C115  | -2.189967090 | 0.261743946   | -9.276952178 |
| C116  | -3.384181961 | -0.639194964  | -7.170638887 |
| C117  | -2.281011205 | -0.601660275  | -6.150172802 |
| C118  | -1.494040170 | 0.551162120   | -5.982800291 |
| C119  | -1.929000582 | -1.769060989  | -5.450656543 |
| C120  | -0.342219046 | 0.505259530   | -5.192509543 |
| C121  | -0.777157965 | -1.812161085  | -4.661880305 |
| C122  | 0.038500460  | -0.681588238  | -4.561025214 |
| C123  | 7.966350969  | -7.279863436  | -2.360679326 |
| C124  | 8.932507998  | -7.363528848  | -1.167172108 |
| C125  | 6.527298915  | -7.658579386  | -1.976069397 |
| C126  | 5.477770263  | -7.414805750  | -3.017445367 |
| C127  | 5.294768929  | -8.095756841  | -4.204261199 |
| C128  | 3.636585016  | -6.654547065  | -3.922044952 |
| C129  | 9.726152686  | -8.544806673  | 0.804887582  |
| C130  | 11.174217126 | -8.504167572  | 0.367974829  |
| C131  | -0.018583103 | -6.906536705  | 0.882943181  |
| C132  | 1.405919722  | -6.696058319  | 1.315415744  |
| C133  | 2.451896668  | -7.183018410  | 0.233359272  |
| C134  | 2.221142022  | -8.688578578  | -0.083291292 |
| C135  | 3.302707904  | -9.264906087  | -1.013343602 |
| C136  | 3.267771770  | -10.762674611 | -1.126205632 |
| C137  | 3.862141534  | -7.082087615  | 0.884291736  |
| C138  | 3.920917631  | -1.249663217  | -1.484245216 |
| Fe139 | 4.168939849  | -2.657240642  | -2.825888143 |
| Fe140 | 2.418157920  | 0.035037687   | -0.760146818 |

|       |               |              |              |
|-------|---------------|--------------|--------------|
| Fe141 | 5.323801079   | -0.096917204 | -0.603725278 |
| Fe142 | 4.264225942   | -0.075763633 | -2.972065494 |
| Fe143 | 4.367379096   | 2.206176989  | -1.564515961 |
| Fe144 | 4.943067992   | -2.584979054 | -0.386046859 |
| Fe145 | 2.355490329   | -2.574306532 | -0.746090774 |
| H146  | -6.765573815  | -6.724376644 | -0.019863262 |
| H147  | -6.589085380  | -5.939629281 | -1.441838522 |
| H148  | -10.122795103 | -3.807820765 | -0.289561414 |
| H149  | -8.911479044  | -5.420112451 | -1.563673440 |
| H150  | -9.187415153  | -6.380656222 | -0.115472963 |
| H151  | -8.432991318  | -1.776318350 | 0.697706766  |
| H152  | -10.137973716 | -4.284104551 | 2.597715692  |
| H153  | -10.202642012 | -1.848332161 | 0.897660094  |
| H154  | -10.055417315 | -4.715124255 | 4.882633196  |
| H155  | -7.630640268  | -4.992821741 | 3.115889835  |
| H156  | -9.724781180  | -2.989906445 | 5.171444456  |
| H157  | -3.450896987  | -1.954152202 | 2.865382305  |
| H158  | -5.971101393  | -3.278375673 | 2.409407873  |
| H159  | -5.494964849  | -5.850465137 | 3.504061260  |
| H160  | -5.777062745  | 1.137578978  | 5.591891679  |
| H161  | -6.733876919  | -1.261642647 | 4.233125060  |
| H162  | -5.649797418  | -5.521862829 | 5.246823680  |
| H163  | -4.857349923  | -1.292426192 | 1.996820505  |
| H164  | -6.457371684  | -2.241700502 | 6.765394576  |
| H165  | -7.309289021  | 0.269700981  | 5.874163954  |
| H166  | -1.201019921  | -3.312073505 | 4.315162880  |
| H167  | -0.728832086  | -2.592147477 | 2.757335782  |
| H168  | 0.514338414   | -2.969600187 | 3.963166549  |
| H169  | -1.706631393  | -0.862151072 | 4.268744273  |
| H170  | -6.291234495  | -3.026950595 | 8.918676527  |
| H171  | -2.226409301  | 2.424536604  | 4.434965174  |
| H172  | -3.269167067  | 1.033308273  | 8.561821349  |
| H173  | -2.923121145  | 4.468917282  | 8.223127306  |
| H174  | -0.021286066  | -0.177203490 | 2.612918442  |
| H175  | 1.301136242   | -0.501459515 | 3.734797108  |
| H176  | 8.037900973   | 1.667508137  | 6.252754638  |
| H177  | -3.011230825  | 4.019081715  | 4.512914979  |
| H178  | -3.392637441  | 5.182690648  | 6.662589322  |
| H179  | -1.265925796  | 3.873876771  | 4.828596093  |
| H180  | -1.673434770  | 5.095576645  | 7.122060473  |
| H181  | -3.504852089  | 2.683286399  | 6.578575717  |
| H182  | -0.463995459  | 2.768772096  | 6.960175361  |
| H183  | -2.256430498  | 0.651097893  | 6.034575564  |
| H184  | 0.155273886   | 0.825515417  | 4.064541942  |
| H185  | 1.723121853   | 4.376637140  | 0.262142540  |
| H186  | 0.783154448   | 5.257307914  | 1.504893714  |
| H187  | 2.827755394   | 5.668009173  | 2.157527534  |
| H188  | 2.723106808   | 5.405611262  | 4.783570895  |
| H189  | 4.815988024   | 4.196287644  | 2.192058910  |
| H190  | 6.317742393   | 2.248483322  | 2.497031283  |
| H191  | 5.046373093   | 1.912399243  | 6.610874980  |
| H192  | -2.374448499  | -1.791725106 | 6.550872323  |
| H193  | -2.283609070  | -4.905269852 | 7.392111002  |
| H194  | -2.025914631  | -4.109786276 | 8.961850147  |
| H195  | -4.048860214  | -3.352738358 | 6.921103471  |
| H196  | -5.719557201  | -1.434943675 | 9.471312552  |
| H197  | 3.522185572   | 3.841645008  | 6.296132021  |
| H198  | 0.569222736   | -1.663899178 | 6.143881620  |
| H199  | -3.180931500  | 2.419206615  | 10.993912851 |
| H200  | -3.573351065  | 0.689186311  | 10.809972099 |
| H201  | -0.835165291  | 0.438807870  | 10.816849365 |

|      |               |              |               |
|------|---------------|--------------|---------------|
| H202 | 9.572222842   | -7.196339366 | 6.839171592   |
| H203 | -1.449602269  | -6.109577638 | -3.436382943  |
| H204 | 0.018644060   | -8.590988652 | 1.823968701   |
| H205 | -1.394418326  | -7.147190397 | -7.810795706  |
| H206 | 0.194224284   | -6.438123562 | -8.203915895  |
| H207 | -2.263991036  | -5.040672351 | -7.007156681  |
| H208 | -1.476737157  | -0.006466769 | -10.092487209 |
| H209 | -2.033285412  | -5.277428298 | -9.535055961  |
| H210 | -3.086284438  | -2.050627049 | -2.587902824  |
| H211 | -4.011623711  | -4.517638322 | -1.027171297  |
| H212 | -0.961388598  | -1.988471100 | -8.461305716  |
| H213 | -3.695376550  | -1.173706830 | -9.229083374  |
| H214 | 0.335899778   | -3.548458736 | -9.211288821  |
| H215 | -1.249033870  | -5.655531334 | -1.747215442  |
| H216 | -0.674757724  | -4.270185838 | -6.988124841  |
| H217 | 0.248762254   | -5.036167480 | -9.910336301  |
| H218 | -6.477885558  | -3.227375494 | -3.310269445  |
| H219 | -3.405826801  | -1.906663514 | -0.852486123  |
| H220 | 1.626861678   | -6.189628733 | -6.657211782  |
| H221 | -2.365891851  | -3.943436935 | -0.803678010  |
| H222 | -3.833165645  | 3.387279116  | 2.046734493   |
| H223 | -2.533929888  | 1.184956751  | 0.818886036   |
| H224 | -8.369608088  | 1.785474336  | 2.293410092   |
| H225 | -7.186693249  | 0.715760636  | -0.231939645  |
| H226 | -6.632327516  | 4.831947518  | 0.468685207   |
| H227 | -8.076784932  | 9.828015293  | 1.393032611   |
| H228 | -7.290999214  | 6.414494943  | 3.144584161   |
| H229 | -8.735981424  | 6.448175446  | 0.768506389   |
| H230 | -5.877959280  | 7.588624563  | 0.674366236   |
| H231 | -9.547818313  | 10.212013843 | -2.561100762  |
| H232 | -2.895182784  | 4.758661285  | 0.212757363   |
| H233 | -4.293710802  | 4.440319341  | -0.812659360  |
| H234 | -9.025839285  | 11.413961451 | -0.367597786  |
| H235 | -7.742133359  | 6.345968858  | -0.687128646  |
| H236 | -5.570652650  | 2.240461802  | 0.142396135   |
| H237 | -7.206693517  | 0.459916263  | 2.220507125   |
| H238 | -9.601929700  | 2.412589374  | -2.069493959  |
| H239 | -1.350669458  | 1.544856863  | -3.241357721  |
| H240 | -10.054631769 | 0.724675489  | -1.762708127  |
| H241 | 9.648814646   | 2.479459202  | 4.689751176   |
| H242 | 8.208915509   | 2.797932517  | 3.985513900   |
| H243 | 2.573573817   | 5.759419018  | -1.671750476  |
| H244 | -0.110583510  | 5.959759337  | -0.539127764  |
| H245 | 2.622857327   | 8.211450768  | -0.655053691  |
| H246 | -2.730794249  | 3.671191928  | -2.656964357  |
| H247 | -3.978037211  | 4.220777920  | -4.242198421  |
| H248 | -3.679108046  | 5.581045072  | -3.475752303  |
| H249 | -4.395058369  | 1.373240789  | -4.894929850  |
| H250 | -6.115097665  | 1.396466365  | -5.385143583  |
| H251 | 1.442792812   | 11.892404751 | -3.596323303  |
| H252 | 0.164924380   | 13.133931062 | -3.720828585  |
| H253 | 0.883537130   | 9.685162090  | -4.116061908  |
| H254 | -0.784146141  | 9.171389985  | -4.264465091  |
| H255 | -1.026468229  | 8.353152803  | -7.639183672  |
| H256 | -0.767130303  | 3.958964527  | -6.661291876  |
| H257 | -6.047646748  | 9.096221934  | -2.855388750  |
| H258 | -2.121400245  | 9.023770168  | 0.203875763   |
| H259 | -2.886982569  | 7.498430051  | -4.771930972  |
| H260 | 2.464582631   | 4.372723408  | -3.987344296  |
| H261 | 3.859601895   | 6.328549576  | -3.541493181  |
| H262 | -0.043692953  | 4.206820256  | -4.072080624  |

|      |              |               |              |
|------|--------------|---------------|--------------|
| H263 | -7.895095805 | 0.018634944   | -2.473403290 |
| H264 | 5.385437122  | 8.856376010   | -4.798693572 |
| H265 | -5.668159198 | -0.827070372  | -3.904425027 |
| H266 | 2.481615474  | 5.065348647   | -5.614615569 |
| H267 | -2.323877298 | 7.320108463   | -1.567929649 |
| H268 | -6.091115787 | 3.505640303   | -4.124172210 |
| H269 | 4.853997926  | 9.631513158   | -3.291428895 |
| H270 | -0.454076810 | 6.755181432   | -7.970275698 |
| H271 | -2.799283828 | 8.549858955   | -6.131000342 |
| H272 | -4.865595333 | -3.486182574  | -3.666568607 |
| H273 | -5.723851312 | -2.754289950  | -1.195128734 |
| H274 | -5.777057949 | 10.884181266  | -1.160566481 |
| H275 | -5.058040909 | 1.709794061   | -2.520317402 |
| H276 | 1.274867444  | 7.089799257   | -4.801316528 |
| H277 | 0.378159021  | 5.281355072   | -6.892498534 |
| H278 | 0.864050539  | 3.243439103   | -5.226209997 |
| H279 | -1.964865665 | 5.412388117   | -4.992535100 |
| H280 | 1.574627420  | 9.666639136   | 1.614178097  |
| H281 | 0.734566910  | 10.197881887  | -1.565398187 |
| H282 | 1.168705216  | 13.089865861  | -1.484491020 |
| H283 | 3.129793940  | 9.890218488   | 0.788897627  |
| H284 | -1.345192640 | 11.152081507  | -0.313477891 |
| H285 | 5.720607525  | -4.333898677  | -7.928510664 |
| H286 | 5.481823517  | -5.701363483  | -6.823035346 |
| H287 | 7.981808935  | -6.226254928  | -2.675650831 |
| H288 | 6.151670483  | -6.539592278  | -8.956316952 |
| H289 | 4.553400362  | -6.881798925  | -8.829776500 |
| H290 | 6.255808980  | 4.494154912   | -0.248386664 |
| H291 | 6.445445920  | 7.423855112   | 0.695607868  |
| H292 | 6.378544362  | 7.151335366   | -3.576023952 |
| H293 | 4.875231466  | 5.569491970   | 0.137547108  |
| H294 | 7.746690312  | 7.754779528   | -0.238912286 |
| H295 | 6.199628073  | 2.035822131   | -5.833236861 |
| H296 | 7.154048282  | 6.116653807   | -1.834974687 |
| H297 | 3.706706348  | -6.269907649  | 6.552430032  |
| H298 | 5.714189141  | -7.800778329  | 4.812684149  |
| H299 | 4.671729326  | 0.299015824   | -6.338831435 |
| H300 | 4.162229912  | 0.224089350   | 3.544503871  |
| H301 | 1.973750802  | 0.398573180   | -8.566621389 |
| H302 | -0.505577782 | -2.724892602  | -4.127136727 |
| H303 | 1.485879815  | 1.108834964   | -7.031250286 |
| H304 | 3.105990197  | -3.853540955  | 5.458409946  |
| H305 | 3.043900092  | -0.846941404  | -6.038468403 |
| H306 | 3.088815801  | -4.645009671  | 3.875719364  |
| H307 | 3.475066968  | -6.816474785  | 4.877512919  |
| H308 | 5.479233913  | -5.341260415  | 4.207782876  |
| H309 | 5.450314886  | -4.654184304  | 5.840922818  |
| H310 | -4.105444012 | -1.433705756  | -6.932478730 |
| H311 | 4.091939241  | -8.730655319  | 7.156013959  |
| H312 | 3.053890960  | -11.333051580 | 5.855868717  |
| H313 | 0.959420878  | -0.692765738  | -3.978194761 |
| H314 | 4.145433739  | -10.857793571 | 8.519840731  |
| H315 | 2.600186787  | -11.147774060 | 8.060502486  |
| H316 | 4.749054248  | -3.132403145  | 3.067833145  |
| H317 | 0.289624795  | 1.384086181   | -5.054712408 |
| H318 | -2.558691340 | -2.657954159  | -5.532006694 |
| H319 | 6.739855915  | -10.500025549 | 1.232120000  |
| H320 | 6.506569901  | -8.733382539  | -1.720400125 |
| H321 | 5.625804541  | -8.528900720  | 2.153412548  |
| H322 | 6.089413466  | -11.306668921 | 0.087969285  |
| H323 | 6.546876276  | 1.032705544   | -8.681991101 |

|       |              |               |              |
|-------|--------------|---------------|--------------|
| H324  | 5.943159167  | -5.504804241  | 1.370353173  |
| H325  | 1.609748319  | -7.201399230  | 2.270483561  |
| H326  | 4.275100350  | -3.106383492  | -6.656263492 |
| H327  | 2.222552701  | -9.245667595  | 0.866850917  |
| H328  | 3.693728860  | -7.915964620  | -5.618220785 |
| H329  | 2.706108924  | -6.129932326  | -4.098394435 |
| H330  | 4.572568637  | -11.965670124 | 6.499141515  |
| H331  | 4.629470480  | -0.998435792  | 2.399248341  |
| H332  | 7.599104493  | -6.244204861  | 2.929470602  |
| H333  | 6.817269100  | -4.227054143  | 1.504249424  |
| H334  | 7.699253714  | -6.948836241  | 5.208095138  |
| H335  | 3.513850106  | -1.955490371  | 6.216059673  |
| H336  | 2.161881101  | -12.208553379 | -1.641418408 |
| H337  | 3.177387373  | -8.829282648  | -2.015693494 |
| H338  | 4.305346896  | -9.005881780  | -0.657495725 |
| H339  | 1.235494083  | -8.805921811  | -0.556899431 |
| H340  | 2.174764954  | -2.945438422  | -5.487946043 |
| H341  | -1.772597247 | 1.469434423   | -6.505935586 |
| H342  | -3.927308204 | 0.316576376   | -7.224097885 |
| H343  | 1.568009020  | -5.616552324  | 1.429166679  |
| H344  | 7.503940477  | -7.789919060  | 3.054732526  |
| H345  | 6.065070373  | -9.522761578  | 3.260048303  |
| H346  | 3.146661906  | -0.392248801  | 5.597215666  |
| H347  | 5.878229620  | -8.877077945  | -4.678192449 |
| H348  | 6.244868614  | -7.113821469  | -1.067696350 |
| H349  | 1.407087061  | -3.872638763  | -6.815427605 |
| H350  | 5.426016211  | 3.066025606   | -7.063856247 |
| H351  | 6.336377176  | 0.072373140   | 5.505940558  |
| H352  | 6.866535236  | 0.231062685   | 3.811577339  |
| H353  | 9.387691692  | -7.762470257  | -3.759248310 |
| H354  | 8.580724723  | -9.063049077  | -3.182651561 |
| H355  | 9.555110952  | -9.530429604  | 1.266678085  |
| H356  | 8.051871059  | -9.098988098  | -0.390615743 |
| H357  | 11.358472037 | -8.842463465  | -0.679691488 |
| H358  | 9.547047690  | -7.779819715  | 1.576764649  |
| H359  | 9.422360760  | -0.472321045  | 4.514135103  |
| H360  | -1.991325150 | 13.800924917  | 1.417156968  |
| H361  | 8.428790561  | -6.711994678  | 8.118119166  |
| H362  | 8.323614972  | -4.390888690  | 6.641666308  |
| H363  | -3.615000871 | 12.791236046  | -0.929115922 |
| H364  | -3.122469552 | 10.920183578  | 1.467691116  |
| H365  | -4.689735900 | 11.601528120  | 0.989274243  |
| H366  | 1.237600861  | -3.336129730  | -0.072401685 |
| H367  | -5.149141893 | 7.208311438   | -3.754016448 |
| H368  | 2.332757039  | -1.276725148  | 0.358528959  |
| H369  | -0.040348856 | -1.351827603  | -0.212328252 |
| H370  | -1.216297599 | 0.149526898   | -1.160355654 |
| Mo371 | 3.789228526  | -4.891927940  | -1.215653168 |
| N372  | -7.246616016 | -6.500194111  | -0.894616618 |
| N373  | -9.338701808 | -3.655195673  | 0.340152332  |
| N374  | -9.607845502 | -3.626395311  | 3.163969548  |
| N375  | -7.243607661 | -4.861408449  | 4.049474680  |
| N376  | -5.263030069 | -3.012368561  | 3.096063784  |
| N377  | -5.964165591 | -0.728959047  | 4.645270271  |
| N378  | -5.893104509 | -1.667612706  | 7.396902814  |
| N379  | -3.550579034 | -3.284901565  | 7.813721744  |
| N380  | -1.386186199 | -2.011434005  | 6.653590033  |
| N381  | -1.432383061 | 0.973533437   | 6.545188153  |
| N382  | -2.583328114 | 1.485178797   | 9.170936030  |
| N383  | 3.448968573  | -10.642517008 | 7.803332210  |
| N384  | 4.608351300  | -8.767619495  | 6.270634955  |

|      |              |               |              |
|------|--------------|---------------|--------------|
| N385 | 4.318399289  | -2.965806711  | 3.981918373  |
| N386 | 3.384338007  | -1.361093631  | 5.403788444  |
| N387 | 4.153302322  | -0.760944645  | 3.288967975  |
| N388 | 7.568332106  | -6.887642152  | 6.241697583  |
| N389 | -5.557675433 | -2.784333779  | -3.345061482 |
| N390 | -1.757461418 | -5.560076654  | -2.628479628 |
| N391 | -5.689643064 | -0.169102316  | -3.107931741 |
| N392 | -8.077955229 | 1.014555323   | -2.376262415 |
| N393 | -7.843760863 | 1.225561253   | 0.366903308  |
| N394 | -5.571445755 | 2.809650244   | 0.987850565  |
| N395 | -2.509721383 | 2.888375085   | -1.981419517 |
| N396 | -1.784026936 | 1.011642982   | -1.200701376 |
| N397 | -6.128967169 | 5.522522479   | 1.021227171  |
| N398 | -8.824771470 | 8.452157167   | -1.547204625 |
| N399 | -8.879678540 | 10.420283704  | -0.523456415 |
| N400 | 8.831417786  | 2.034579871   | 4.265200991  |
| N401 | 7.130232885  | 6.995101423   | 0.064381286  |
| N402 | 5.692609677  | 7.718170350   | -3.084228497 |
| N403 | 3.150293880  | 6.957687161   | -3.945930562 |
| N404 | -1.318797911 | 5.741022472   | -5.729976037 |
| N405 | -0.871464821 | 7.404768649   | -7.313232777 |
| N406 | -2.354729654 | 7.817449225   | -5.583662809 |
| N407 | 1.637442446  | 6.210649159   | -1.639359236 |
| N408 | 1.806465036  | 8.588876854   | -0.162877792 |
| N409 | 0.815138938  | 11.089528831  | -1.074585546 |
| N410 | -0.116023614 | 9.900050314   | -4.018222021 |
| N411 | -1.681443778 | 12.096543954  | -0.483580226 |
| N412 | 5.222242477  | -6.114110685  | -8.940836505 |
| N413 | 3.466219477  | -3.649149694  | -6.976120847 |
| N414 | 2.484163912  | -0.742882255  | -6.912204319 |
| N415 | 4.635313753  | 1.143627609   | -6.922249208 |
| N416 | -0.280803651 | -4.178781017  | -9.738964683 |
| N417 | -1.959996505 | -2.089964874  | -8.672873987 |
| N418 | 8.456780006  | -8.092870503  | -3.489778961 |
| N419 | 4.428023161  | -6.509916636  | -2.861902972 |
| N420 | 4.132657330  | -7.601480496  | -4.756816399 |
| N421 | 8.812488049  | -8.423454363  | -0.319320567 |
| N422 | 0.582117839  | 1.786118271   | 0.720043087  |
| N423 | 1.262158776  | 1.093379440   | 0.133806425  |
| O424 | -7.241429493 | -4.297557854  | 0.951061296  |
| O425 | -8.417473494 | -1.683581058  | 3.205153855  |
| O426 | -7.520469986 | -3.845989073  | 6.078322264  |
| O427 | -4.048041027 | -3.605452423  | 4.925859427  |
| O428 | -3.789545722 | -0.069658024  | 4.503266158  |
| O429 | -5.055469870 | 0.402383486   | 7.880814983  |
| O430 | -3.672323881 | -2.780093820  | 10.048331225 |
| O431 | 0.080636870  | -3.599399557  | 7.437353527  |
| O432 | 0.762422795  | 0.606690313   | 7.065283891  |
| O433 | -0.825387962 | 2.900354993   | 9.410485081  |
| O434 | -1.390024492 | 1.356854425   | 12.553129462 |
| O435 | 5.307074320  | -10.295239217 | 4.679731076  |
| O436 | 6.112379884  | -7.100581920  | 8.007437449  |
| O437 | 10.268897562 | -4.708424582  | 7.168223140  |
| O438 | -5.472048440 | -0.162355817  | -0.825286669 |
| O439 | -3.401971310 | -4.576479556  | -3.855544259 |
| O440 | -7.263226576 | 3.112132209   | -2.793613849 |
| O441 | -5.326751079 | 3.197843277   | -4.678828644 |
| O442 | -9.882868689 | 2.278341402   | 0.520317337  |
| O443 | -6.201299941 | 2.867716047   | 3.181372520  |
| O444 | -4.324064139 | 5.883121806   | 2.375054419  |
| O445 | -6.827905271 | 8.394542389   | 2.973875056  |

|  |                                   |              |               |              |
|--|-----------------------------------|--------------|---------------|--------------|
|  | O446                              | 9.083869724  | -0.659771353  | 6.519348437  |
|  | O447                              | 3.257985202  | 5.221904122   | 3.989738696  |
|  | O448                              | 4.661276269  | 8.159110162   | -1.101703861 |
|  | O449                              | 2.641058419  | 9.131020439   | -4.497168233 |
|  | O450                              | -0.227046045 | 6.788931329   | -2.840933257 |
|  | O451                              | -0.084753059 | 8.001331601   | 0.992373074  |
|  | O452                              | 2.738321680  | 5.943780604   | 1.222274894  |
|  | O453                              | 1.828166323  | 12.171126035  | 0.669417179  |
|  | O454                              | -1.260235565 | 14.063924736  | -1.555949548 |
|  | O455                              | -1.813373305 | 11.411914284  | -3.808406409 |
|  | O456                              | -3.950076877 | 14.326408894  | 1.171380672  |
|  | O457                              | -4.284966546 | 7.124357764   | -3.306732962 |
|  | O458                              | 2.748226787  | -5.683548551  | -7.769339000 |
|  | O459                              | 1.012795055  | -1.834413314  | -8.288130812 |
|  | O460                              | 3.364711422  | 2.579705780   | -8.170151606 |
|  | O461                              | 7.992635231  | 2.161031415   | -7.784763770 |
|  | O462                              | -3.690992285 | -3.487057371  | -9.180702713 |
|  | O463                              | -0.925653340 | -7.132596359  | -5.213803415 |
|  | O464                              | 1.125971294  | -6.529656624  | -5.850207428 |
|  | O465                              | -2.456376505 | 1.428858261   | -9.029786900 |
|  | O466                              | 9.856480423  | -6.541491816  | -1.021558000 |
|  | O467                              | 12.096928798 | -8.200573811  | 1.111113553  |
|  | O468                              | -0.679622661 | -6.136925265  | 0.201555858  |
|  | O469                              | -0.612816287 | -8.077290349  | 1.284803134  |
|  | O470                              | 4.187086371  | -11.522368683 | -0.828217964 |
|  | O471                              | 2.087383756  | -11.230724289 | -1.609586525 |
|  | O472                              | 4.714791340  | -6.338339301  | 0.255697536  |
|  | O473                              | 4.128912834  | -7.742814575  | 1.913778378  |
|  | O474                              | 2.355887405  | -6.400041665  | -0.895453421 |
|  | O475                              | 7.985982518  | -7.005294731  | 3.428600633  |
|  | O476                              | 6.550671439  | -5.030615564  | 1.991628098  |
|  | O477                              | -3.243906911 | 4.769287660   | -3.842214679 |
|  | O478                              | 6.946689554  | -11.182649159 | 0.544767976  |
|  | O479                              | 6.406914579  | -9.087910227  | 2.436698993  |
|  | S480                              | 4.563174055  | 4.508092611   | -2.015394072 |
|  | S481                              | 2.516007497  | 1.414002115   | -2.740277188 |
|  | S482                              | 2.247210626  | -3.839112589  | -2.635401375 |
|  | S483                              | 4.022685906  | 1.334561194   | 0.479579375  |
|  | S484                              | 0.581231583  | -1.308306663  | -1.423971528 |
|  | S485                              | 4.654325369  | -1.512829422  | -4.676030492 |
|  | S486                              | 3.407690722  | -3.698069190  | 0.801781723  |
|  | S487                              | 6.191185739  | 1.018788685   | -2.333013319 |
|  | S488                              | 5.836189735  | -3.900787033  | -1.944784342 |
|  | S489                              | 6.372699078  | -1.437270389  | 0.827725358  |
|  | <b>1(b)</b>                       |              |               |              |
|  | Fe( 139)                          | 0.563        | -2.473        |              |
|  | Fe( 140)                          | 0.359        | -0.012        |              |
|  | Fe( 141)                          | 0.542        | -2.552        |              |
|  | Fe( 142)                          | 0.556        | 2.690         |              |
|  | Fe( 143)                          | 0.512        | 1.754         |              |
|  | Fe( 144)                          | 0.514        | 2.317         |              |
|  | Fe( 145)                          | 0.204        | 0.175         |              |
|  | <b>S=1</b>                        |              |               |              |
|  | bm2cnx2b6x2hn2n2xd135tfadtf.car_3 |              |               |              |
|  | 489                               |              |               |              |
|  | C1                                | -2.645284565 | -4.304184301  | -7.953356711 |
|  | C2                                | -1.617392175 | -4.434413221  | -9.082674655 |
|  | C3                                | -4.964559877 | -3.752323786  | -7.366566834 |
|  | C4                                | -5.324850414 | -4.957079061  | -6.500943972 |
|  | C5                                | -5.496135126 | -7.384819903  | -6.313415734 |
|  | C6                                | -4.492292346 | -7.646391798  | -5.185357607 |
|  | C7                                | -2.198545160 | -7.330542918  | -4.383802767 |
|  | C8                                | -2.395128412 | -6.308579112  | -3.259476464 |
|  | C9                                | -2.988635333 | -4.026383253  | -2.641438595 |
|  | C10                               | -4.205030281 | -4.338504930  | -1.755958170 |
|  | C11                               | -6.447388054 | -5.262242550  | -1.595084456 |
|  | C12                               | -6.278341878 | -6.509336026  | -0.715097179 |
|  | C13                               | -5.680063103 | -8.884491103  | -0.647831801 |
|  | C14                               | -4.471476274 | -9.185634505  | 0.245483071  |

|     |               |               |              |
|-----|---------------|---------------|--------------|
| C15 | -2.066428595  | -8.857412333  | 0.631502805  |
| C16 | -1.564453582  | -7.745100791  | 1.555587192  |
| C17 | -1.851232924  | -5.372901791  | 2.217652673  |
| C18 | -2.930072278  | -4.943065138  | 3.228448412  |
| C19 | -1.423185460  | -4.239630254  | 1.244227950  |
| C20 | -1.171065558  | -2.912797866  | 1.965204400  |
| C21 | -0.190434972  | -4.658526518  | 0.435301349  |
| C22 | -5.263981015  | -4.232725838  | 3.593788190  |
| C23 | -5.933459465  | -5.454488806  | 4.254353698  |
| C24 | -6.275678502  | -3.336247007  | 2.838509162  |
| C25 | -7.493072586  | -3.019515453  | 3.714968537  |
| C26 | -5.608868834  | -2.038419573  | 2.364240715  |
| C27 | -6.985921385  | -7.628022046  | 3.992112088  |
| C28 | -6.213262981  | -8.265799700  | 5.131261848  |
| C29 | 7.125965107   | -11.292940064 | 1.318837967  |
| C30 | 7.244518464   | -9.922706724  | 1.988895153  |
| C31 | 6.028272672   | -8.346998278  | 3.503435700  |
| C32 | 6.087154976   | -8.697411101  | 5.002807428  |
| C33 | 4.703019146   | -7.655289118  | 3.135317483  |
| C34 | 4.463340316   | -6.339883083  | 3.881991670  |
| C35 | 3.321598550   | -5.546946381  | 3.245032927  |
| C36 | 1.993332463   | -3.714782196  | 4.317819871  |
| C37 | 7.129128394   | -8.167965835  | 7.156156311  |
| C38 | 6.515961100   | -7.087295823  | 8.021630439  |
| C39 | -1.125810409  | -0.678364834  | -5.851795148 |
| C40 | -2.332173461  | 0.134052031   | -5.352942149 |
| C41 | -0.115561493  | -0.786784312  | -4.686197576 |
| C42 | 1.025693579   | -1.807415576  | -4.878742864 |
| C43 | 2.287578288   | -1.253012826  | -5.538040048 |
| C44 | -3.331613843  | 2.375843214   | -5.343186934 |
| C45 | -4.769853731  | 2.204613041   | -5.850545483 |
| C46 | -2.851042562  | 3.822970761   | -5.573043441 |
| C47 | -6.349142964  | 0.756180850   | -7.038640569 |
| C48 | -6.951032854  | -0.214219651  | -6.010592485 |
| C49 | -6.542930114  | -1.613565812  | -4.025459575 |
| C50 | -6.554618570  | -1.038228200  | -2.607623798 |
| C51 | -5.829704650  | 0.709033189   | -1.045724661 |
| C52 | -7.226884578  | 1.194694680   | -0.588753417 |
| C53 | -4.944464718  | 1.963936511   | -0.987857069 |
| C54 | -3.485565947  | 1.808535196   | -1.268526729 |
| C55 | -2.603285736  | 0.758966855   | -1.198360030 |
| C56 | -1.440787249  | 2.581991027   | -1.715099891 |
| C57 | -9.215875062  | 2.458156886   | -1.331671369 |
| C58 | -10.241107767 | 1.545407527   | -0.661955394 |
| C59 | -9.741282039  | 2.971942559   | -2.691416630 |
| C60 | -10.705285206 | 4.121157753   | -2.647079539 |
| C61 | -11.760966780 | 4.389961749   | -1.797567757 |
| C62 | -11.569894764 | 5.987369783   | -3.322555836 |
| C63 | 2.491351104   | -2.019845780  | 9.245540875  |
| C64 | 3.767123281   | -2.830895329  | 9.370854786  |
| C65 | 2.040977550   | -2.126509550  | 7.763841988  |
| C66 | 0.750499349   | -1.393324075  | 7.487679402  |
| C67 | -0.497065776  | -2.023688024  | 7.647623144  |
| C68 | 0.759504623   | -0.048661398  | 7.077597312  |
| C69 | -1.693740316  | -1.340151900  | 7.406815158  |
| C70 | -0.425464360  | 0.649420085   | 6.842963605  |
| C71 | -1.653260580  | 0.001991126   | 7.008142509  |
| C72 | 0.543129538   | 5.885054225   | 6.973594205  |
| C73 | -0.485311287  | 6.898210424   | 6.458245870  |
| C74 | 0.604847885   | 4.668523684   | 6.039916735  |
| C75 | -0.836359624  | 9.118529665   | 5.461747944  |



|      |               |              |              |
|------|---------------|--------------|--------------|
| C76  | -1.416252500  | 8.860531147  | 4.070456317  |
| C77  | -1.324186297  | 7.447642636  | 2.042567145  |
| C78  | -2.409201568  | 6.352785708  | 2.144587774  |
| C79  | -0.116784078  | 7.027770831  | 1.184496047  |
| C80  | -0.385297262  | 6.601136688  | -0.262081851 |
| C81  | -0.845577577  | 7.694921812  | -1.240284556 |
| C82  | -3.033802130  | 8.889939086  | -1.237064628 |
| C83  | -3.251487052  | 4.370739075  | 3.290139448  |
| C84  | -4.472639213  | 4.798886023  | 4.124082533  |
| C85  | -2.667732073  | 3.092381916  | 3.914522332  |
| C86  | -5.207064001  | 5.958238966  | 6.147766003  |
| C87  | -6.177601707  | 7.134292743  | 6.084542068  |
| C88  | -6.963506999  | 9.114295328  | 4.855446397  |
| C89  | -8.414772966  | 8.899893395  | 4.372414869  |
| C90  | -6.248707601  | 10.183461895 | 4.002900654  |
| C91  | -6.083635207  | 9.740869168  | 2.552884457  |
| C92  | -9.987401135  | 7.392588236  | 3.237214067  |
| C93  | -11.103194830 | 7.387095960  | 4.275631793  |
| C94  | -9.930548966  | 6.018985050  | 2.515761769  |
| C95  | -8.935089759  | 6.015698179  | 1.378960656  |
| C96  | -9.297587295  | 6.527944333  | 0.123088157  |
| C97  | -7.615641709  | 5.565854760  | 1.556878516  |
| C98  | -8.371175848  | 6.615126268  | -0.918073541 |
| C99  | -6.666262293  | 5.670222555  | 0.534414085  |
| C100 | -7.058374390  | 6.200146676  | -0.693042507 |
| C101 | 9.789837577   | 3.437700864  | -2.464777447 |
| C102 | 8.498599544   | 3.254723146  | -3.243529519 |
| C103 | 6.022980722   | 3.402382026  | -3.124979321 |
| C104 | 5.263891165   | 4.733051237  | -3.190188122 |
| C105 | 4.097261969   | 6.439566571  | -1.877937877 |
| C106 | 4.275983457   | 7.245697413  | -0.595105702 |
| C107 | 5.158465666   | 7.394629757  | 1.688091516  |
| C108 | 6.508595623   | 8.064303585  | 1.847244650  |
| C109 | 5.446973148   | 3.821770232  | -7.648810276 |
| C110 | 4.041376392   | 4.396811366  | -7.857601663 |
| C111 | 5.331394275   | 2.426878070  | -6.992804508 |
| C112 | 6.646943999   | 1.637436189  | -7.113894318 |
| C113 | 6.619353400   | 0.422551295  | -6.214338134 |
| C114 | 2.116602981   | 5.531379974  | -6.866866808 |
| C115 | 2.029188062   | 6.909773231  | -6.241393272 |
| C116 | 1.023110088   | 4.536777702  | -6.407280613 |
| C117 | 1.328518786   | 3.959448468  | -5.051185220 |
| C118 | 1.019615178   | 4.663828149  | -3.875814473 |
| C119 | 2.049154349   | 2.756471375  | -4.948464881 |
| C120 | 1.485354008   | 4.202404061  | -2.639074983 |
| C121 | 2.513587164   | 2.298592703  | -3.714038347 |
| C122 | 2.257964411   | 3.041843229  | -2.557599053 |
| C123 | 10.844635385  | -1.525245731 | 1.483437230  |
| C124 | 11.058506811  | -2.341418795 | 2.768943899  |
| C125 | 10.005692157  | -2.281686838 | 0.440027489  |
| C126 | 9.578553723   | -1.487698783 | -0.756416869 |
| C127 | 10.375492641  | -1.055146620 | -1.796511719 |
| C128 | 8.258246693   | -0.585356012 | -2.247108831 |
| C129 | 11.548653877  | -4.472750085 | 3.834892804  |
| C130 | 12.622500138  | -3.885201087 | 4.723713602  |
| C131 | 4.094169023   | -4.983069881 | -2.637165358 |
| C132 | 4.733144500   | -4.964458820 | -1.276210777 |
| C133 | 6.156312786   | -4.272772321 | -1.264290224 |
| C134 | 7.103812643   | -5.007673987 | -2.259351708 |
| C135 | 8.562113121   | -4.528255149 | -2.157579485 |
| C136 | 9.537977403   | -5.390898273 | -2.906586236 |

|       |              |              |              |
|-------|--------------|--------------|--------------|
| C137  | 6.748022286  | -4.494999297 | 0.159460919  |
| C138  | 3.947410029  | 0.947994198  | 1.599579955  |
| Fe139 | 5.557475067  | 1.150313352  | 0.510915151  |
| Fe140 | 1.852380678  | 0.942677670  | 1.410859707  |
| Fe141 | 3.765998951  | 1.177562171  | 3.586814160  |
| Fe142 | 4.020552181  | 2.879949382  | 1.653215762  |
| Fe143 | 2.219570794  | 3.313560915  | 3.599798083  |
| Fe144 | 5.035410064  | -0.589435142 | 2.320766509  |
| Fe145 | 3.485830615  | -0.660083548 | 0.178269491  |
| H146  | -0.100741744 | -5.234265415 | -7.977478331 |
| H147  | 0.053557805  | -3.628580367 | -8.223425907 |
| H148  | -4.087746410 | -3.766722364 | -9.318516708 |
| H149  | -1.756828597 | -3.599152411 | -9.787709701 |
| H150  | -1.876966107 | -5.347923248 | -9.644476387 |
| H151  | -4.672753167 | -2.950727490 | -6.673072692 |
| H152  | -4.914102008 | -6.246563099 | -8.046070803 |
| H153  | -5.865859413 | -3.430298103 | -7.905298830 |
| H154  | -5.485975237 | -8.241852690 | -6.999229912 |
| H155  | -3.021092289 | -6.681556004 | -6.242906412 |
| H156  | -6.488903676 | -7.327806853 | -5.848370275 |
| H157  | -2.131684897 | -3.910295266 | -1.964241686 |
| H158  | -2.745614612 | -4.802853623 | -4.634839440 |
| H159  | -1.215518856 | -7.176326592 | -4.849878345 |
| H160  | -6.717524718 | -4.430342065 | -0.932505240 |
| H161  | -5.269755842 | -5.051101437 | -3.384884274 |
| H162  | -2.212011393 | -8.324519559 | -3.921556930 |
| H163  | -3.148639649 | -3.070239340 | -3.160483026 |
| H164  | -5.452668817 | -7.556105959 | -2.300905174 |
| H165  | -7.278780587 | -5.437576544 | -2.292349911 |
| H166  | -0.366643896 | -5.583013985 | -0.133110074 |
| H167  | 0.081445072  | -3.865522514 | -0.278746591 |
| H168  | 0.677203752  | -4.816022473 | 1.095048267  |
| H169  | -2.259887293 | -4.088583335 | 0.542613088  |
| H170  | -5.720313839 | -9.666645901 | -1.420006916 |
| H171  | -4.768546013 | -2.225179693 | 1.680642465  |
| H172  | -6.212587309 | -6.403327672 | 2.419450366  |
| H173  | -8.034840195 | -3.925767203 | 4.020733466  |
| H174  | -0.960473707 | -2.123568331 | 1.230629622  |
| H175  | -0.295998305 | -2.967947986 | 2.628051399  |
| H176  | 1.721183344  | -2.507269277 | 9.873400873  |
| H177  | -6.343852472 | -1.413374173 | 1.835061228  |
| H178  | -8.193545047 | -2.376258501 | 3.163094073  |
| H179  | -5.232814855 | -1.460624696 | 3.224463555  |
| H180  | -7.187667072 | -2.486376373 | 4.628896719  |
| H181  | -6.624989759 | -3.897937603 | 1.953164834  |
| H182  | -4.838337759 | -3.662847524 | 4.432727725  |
| H183  | -4.292556856 | -4.577993063 | 1.709719464  |
| H184  | -2.034626406 | -2.584275303 | 2.562022921  |
| H185  | -1.697057548 | 2.872973901  | 3.436844731  |
| H186  | -3.365780684 | 2.270432334  | 3.690611196  |
| H187  | -2.647178900 | 2.377908851  | 5.745932479  |
| H188  | -3.580780057 | 0.156798226  | 6.822466767  |
| H189  | -0.400215834 | 1.684716539  | 6.502602354  |
| H190  | 1.711127791  | 0.456828810  | 6.904031577  |
| H191  | -0.538599500 | -3.070939113 | 7.958782759  |
| H192  | -2.996977779 | -6.507654741 | 0.806444980  |
| H193  | -1.254783856 | -9.071315670 | -0.079823347 |
| H194  | -2.222219588 | -9.749985780 | 1.250484655  |
| H195  | -3.229047164 | -8.012081490 | -0.939158529 |
| H196  | -6.566964766 | -8.987464222 | -0.009815564 |
| H197  | -2.654048497 | -1.850656497 | 7.523397041  |

|      |               |              |              |
|------|---------------|--------------|--------------|
| H198 | -0.989542497  | -5.667016735 | 2.831366621  |
| H199 | -8.002800912  | -7.387791543 | 4.342073588  |
| H200 | -7.072498922  | -8.383804049 | 3.195743427  |
| H201 | -5.111477872  | -8.096335937 | 5.108462029  |
| H202 | 8.196161412   | -8.273595428 | 7.405255449  |
| H203 | 4.331574027   | -1.392375007 | -5.480220309 |
| H204 | 4.859151819   | -6.735579539 | -2.897008963 |
| H205 | 6.772368581   | 1.297589369  | -8.152171341 |
| H206 | 7.501488474   | 2.279476852  | -6.855038602 |
| H207 | 4.525079493   | 1.848817289  | -7.470061200 |
| H208 | 2.979792403   | 7.490864926  | -6.284630663 |
| H209 | 5.825039917   | 3.676074500  | -8.672116827 |
| H210 | 0.305959793   | 0.212931376  | -4.491601257 |
| H211 | 0.679368788   | -2.652935952 | -5.498297056 |
| H212 | 3.978052269   | 5.079314423  | -5.895938437 |
| H213 | 1.944584245   | 5.722560831  | -7.946145053 |
| H214 | 6.127118595   | 4.872716162  | -5.991959018 |
| H215 | 3.502286396   | -2.367779252 | -4.270219009 |
| H216 | 5.046592655   | 2.556259811  | -5.936862575 |
| H217 | 7.305823369   | 4.470347652  | -7.069459447 |
| H218 | -0.871621613  | -0.483385594 | -7.892929724 |
| H219 | -0.683060670  | -1.080813610 | -3.791543711 |
| H220 | 7.684983426   | 1.446435118  | -4.915767240 |
| H221 | 1.289399591   | -2.239363253 | -3.903238800 |
| H222 | -5.503373975  | -0.039526529 | -0.308801317 |
| H223 | -2.756136413  | -0.287354997 | -0.957814472 |
| H224 | -7.576107792  | -1.907408788 | -4.250352938 |
| H225 | -5.092671304  | -0.493365487 | -5.120667175 |
| H226 | -7.663882465  | 1.608516575  | -2.544260421 |
| H227 | -12.153801300 | 3.869487645  | -0.931456201 |
| H228 | -10.199167569 | 0.483021909  | -1.004078859 |
| H229 | -10.163001571 | 2.123668410  | -3.259672178 |
| H230 | -9.012102713  | 3.304746006  | -0.656799367 |
| H231 | -11.787874418 | 6.902757233  | -3.865110804 |
| H232 | -5.056401911  | 2.377204202  | 0.028151766  |
| H233 | -5.359266929  | 2.717127899  | -1.677464681 |
| H234 | -13.085390387 | 6.069094044  | -1.829032186 |
| H235 | -8.871238004  | 3.324003120  | -3.267945145 |
| H236 | -5.166119267  | 0.420313356  | -3.071687142 |
| H237 | -5.942172877  | -2.535238434 | -4.018799135 |
| H238 | -7.023325442  | 1.620531845  | -7.091044716 |
| H239 | -0.604784014  | 3.229957995  | -1.961931427 |
| H240 | -6.350975381  | 0.266756445  | -8.021515596 |
| H241 | 2.853004441   | -0.539515435 | 10.617756405 |
| H242 | 1.985329242   | -0.037988475 | 9.326031177  |
| H243 | -1.326691566  | 5.313439326  | 3.584120837  |
| H244 | -3.645179369  | 4.110108906  | 2.297230499  |
| H245 | -3.302934377  | 6.062104182  | 5.236842212  |
| H246 | -3.108049788  | 3.902239864  | -1.754432977 |
| H247 | -3.652351749  | 5.280637351  | -3.245372725 |
| H248 | -4.627405369  | 5.590833801  | -2.028119978 |
| H249 | -1.843270124  | 3.943517385  | -5.152308607 |
| H250 | -2.811008994  | 4.038207959  | -6.654152310 |
| H251 | -5.280915344  | 10.412621120 | 4.471730288  |
| H252 | -6.869884183  | 11.088606492 | 4.015967078  |
| H253 | -4.017760696  | 9.374552959  | 2.812476514  |
| H254 | -4.724590190  | 8.905883738  | 1.278494814  |
| H255 | -3.055050364  | 10.922845709 | -0.999484178 |
| H256 | -0.432974871  | 7.499969098  | -2.242030097 |
| H257 | -8.672153004  | 7.007982106  | -1.892120085 |
| H258 | -7.299768142  | 5.123256293  | 2.506434515  |

|      |               |               |              |
|------|---------------|---------------|--------------|
| H259 | -4.845243260  | 7.901502327   | -1.244575334 |
| H260 | 0.396816757   | 6.191677934   | 1.685416110  |
| H261 | -0.115694473  | 7.290934061   | 3.796387595  |
| H262 | -1.081831679  | 5.748584355   | -0.294386160 |
| H263 | -4.202642589  | 0.693144343   | -7.084899934 |
| H264 | -0.268916702  | 10.058228168  | 5.422544829  |
| H265 | -1.637098227  | 1.597552840   | -6.526111990 |
| H266 | 0.588441265   | 7.875184193   | 1.179707343  |
| H267 | -5.627976248  | 5.380769570   | 0.710821153  |
| H268 | -4.636118087  | 4.402551133   | -5.051901164 |
| H269 | -1.692616889  | 9.270889332   | 6.133487669  |
| H270 | -1.526456943  | 10.269715129  | -1.467050760 |
| H271 | -4.934276366  | 9.614634284   | -1.417094464 |
| H272 | 0.496032807   | -0.132540973  | -6.997973423 |
| H273 | -1.516712395  | -1.693404393  | -6.051524098 |
| H274 | -10.321968323 | 6.867009265   | -0.048918920 |
| H275 | -3.416285446  | 2.225175887   | -4.253651029 |
| H276 | -1.828320403  | 8.312130524   | 1.590344959  |
| H277 | -0.444054385  | 8.663212707   | -0.915782975 |
| H278 | 0.576426522   | 6.226310137   | -0.635900963 |
| H279 | -2.803504853  | 6.911730085   | -1.611938716 |
| H280 | -5.822805402  | 5.050972398   | 6.237546548  |
| H281 | -5.445117357  | 7.698749457   | 4.254534914  |
| H282 | -7.067997634  | 9.509286594   | 5.876364802  |
| H283 | -4.637702903  | 6.072975887   | 7.080869598  |
| H284 | -7.941620038  | 7.013779619   | 3.759455072  |
| H285 | 9.658118150   | 4.212116782   | -1.695621147 |
| H286 | 9.955402935   | 2.479164248   | -1.929843367 |
| H287 | 10.296379716  | -0.625510549  | 1.797204842  |
| H288 | 11.766423238  | 3.725946676   | -2.872369888 |
| H289 | 10.907096461  | 3.149870821   | -4.141905638 |
| H290 | 1.391649820   | 3.998076251   | 6.410190388  |
| H291 | -0.751388390  | 5.088994135   | 8.333311631  |
| H292 | 1.029325303   | 8.205305161   | 5.971997898  |
| H293 | -0.361319983  | 4.144380202   | 6.068086217  |
| H294 | 0.247527881   | 6.209683618   | 8.980610905  |
| H295 | 4.992888274   | 6.692713167   | 2.520018480  |
| H296 | 1.535886117   | 6.360690894   | 7.003339169  |
| H297 | 3.873108169   | -8.357429426  | 3.321028345  |
| H298 | 6.865169058   | -7.690053441  | 3.235972883  |
| H299 | 5.357099526   | 5.746001269   | 0.365656246  |
| H300 | 1.125592153   | -1.995017230  | 4.999936406  |
| H301 | 4.386648883   | 7.087814361   | -2.715730974 |
| H302 | 3.070444312   | 1.362368458   | -3.645809024 |
| H303 | 3.014849020   | 6.260877154   | -1.981874788 |
| H304 | 2.374388290   | -6.100002666  | 3.293932292  |
| H305 | 4.923938381   | 4.546219450   | -1.187055032 |
| H306 | 3.539939431   | -5.380491401  | 2.177222399  |
| H307 | 4.734333475   | -7.466032817  | 2.049800508  |
| H308 | 5.368203655   | -5.714449585  | 3.851371202  |
| H309 | 4.228987267   | -6.526966070  | 4.942449901  |
| H310 | 0.965868885   | 3.736546024   | -7.158845629 |
| H311 | 5.465041755   | -10.310050196 | 2.814891594  |
| H312 | 6.961832461   | -11.090722677 | 0.249379727  |
| H313 | 2.639556688   | 2.721308309   | -1.588790540 |
| H314 | 6.329560162   | -12.684060270 | 2.612502320  |
| H315 | 5.677529009   | -12.740789690 | 1.110485297  |
| H316 | 3.878204176   | -3.542681190  | 3.645545972  |
| H317 | 1.262743072   | 4.748189375   | -1.721075005 |
| H318 | 2.253226054   | 2.171406297   | -5.847390562 |
| H319 | 10.676152752  | -6.481936119  | 0.977457011  |

|       |               |               |              |
|-------|---------------|---------------|--------------|
| H320  | 10.594562323  | -3.143229908  | 0.077713785  |
| H321  | 8.317747003   | -6.130035059  | 1.482689257  |
| H322  | 11.224305571  | -6.223628448  | -0.442856496 |
| H323  | 7.070533638   | 8.224425198   | 0.894429716  |
| H324  | 6.882292928   | -3.592512132  | 2.649666627  |
| H325  | 4.829924872   | -5.981318271  | -0.868497471 |
| H326  | 7.418258711   | 3.808837938   | -1.590808651 |
| H327  | 7.066590902   | -6.086458946  | -2.037675588 |
| H328  | 9.793517294   | -0.104185856  | -3.624224783 |
| H329  | 7.388140139   | -0.244868874  | -2.795176002 |
| H330  | 8.118153843   | -11.769008206 | 1.401373923  |
| H331  | 2.640956996   | -1.761008225  | 4.182644610  |
| H332  | 7.832713919   | -4.990221262  | 4.348543872  |
| H333  | 6.578307865   | -2.766432669  | 3.929061639  |
| H334  | 7.475185482   | -7.169397669  | 5.279746923  |
| H335  | 1.147635843   | -5.499654363  | 4.892144277  |
| H336  | 9.962668145   | -6.034269749  | -4.634394268 |
| H337  | 8.631626489   | -3.500431324  | -2.541854968 |
| H338  | 8.894278869   | -4.521104328  | -1.113741202 |
| H339  | 6.735721646   | -4.848337147  | -3.283298555 |
| H340  | 5.483349007   | 2.673656561   | -2.499533050 |
| H341  | 0.448417183   | 5.593412869   | -3.939619966 |
| H342  | 0.066175025   | 5.081003724   | -6.414027404 |
| H343  | 4.098102571   | -4.361880816  | -0.614414940 |
| H344  | 8.721371470   | -6.065393908  | 3.660389235  |
| H345  | 8.810829990   | -7.530541826  | 1.943939967  |
| H346  | 0.090448484   | -4.141771070  | 4.984988485  |
| H347  | 11.447398738  | -1.113291652  | -1.946498462 |
| H348  | 9.109274002   | -2.687429236  | 0.923649759  |
| H349  | 6.113818666   | 3.014148163   | -4.141305166 |
| H350  | 4.390693451   | 8.183961851   | 1.748175239  |
| H351  | 1.925854724   | -3.195811233  | 7.530027899  |
| H352  | 2.847023041   | -1.725318081  | 7.128916544  |
| H353  | 12.639764044  | -0.540115284  | 1.624769592  |
| H354  | 12.721879210  | -1.907972740  | 0.731855926  |
| H355  | 11.902350452  | -5.463490272  | 3.507755152  |
| H356  | 11.279997904  | -4.155157686  | 1.746509724  |
| H357  | 13.383853200  | -3.260927241  | 4.197450556  |
| H358  | 10.625262308  | -4.624438842  | 4.416682670  |
| H359  | 4.688651313   | -2.284129039  | 9.057108076  |
| H360  | -10.773386112 | 7.224867501   | 5.328828324  |
| H361  | 6.625016920   | -9.115695107  | 7.415912655  |
| H362  | 5.698215490   | -6.499731429  | 7.538119603  |
| H363  | -10.230006284 | 8.176318362   | 2.500744509  |
| H364  | -9.682562249  | 5.235975036   | 3.248818356  |
| H365  | -10.941857932 | 5.809255050   | 2.139644641  |
| H366  | 2.998357471   | -1.789574720  | -0.703114268 |
| H367  | -6.523446712  | 6.616120983   | -2.521399230 |
| H368  | 2.230273803   | -0.754932708  | 1.287042213  |
| H369  | 0.873107974   | -0.685817137  | -0.686158394 |
| H370  | -0.438320571  | 0.785777603   | -1.426103314 |
| Mo371 | 6.106348949   | -1.527882817  | 0.003864435  |
| N372  | -0.224084160  | -4.500772801  | -8.679865702 |
| N373  | -3.915155224  | -4.002370373  | -8.344149430 |
| N374  | -5.215707045  | -6.179610202  | -7.077087274 |
| N375  | -3.215871838  | -7.250565684  | -5.420641155 |
| N376  | -2.720143905  | -5.047164269  | -3.643370570 |
| N377  | -5.266318078  | -4.918854711  | -2.370470867 |
| N378  | -5.709314462  | -7.590076695  | -1.310833733 |
| N379  | -3.296429973  | -8.583973195  | -0.091863763 |
| N380  | -2.251697113  | -6.574256450  | 1.496069240  |

|      |               |               |              |
|------|---------------|---------------|--------------|
| N381 | -4.157312985  | -4.630583740  | 2.720531210  |
| N382 | -6.296601224  | -6.475619771  | 3.435770709  |
| N383 | 6.015146767   | -12.102881205 | 1.832434486  |
| N384 | 6.178179818   | -9.577091907  | 2.735642504  |
| N385 | 3.147574178   | -4.226758434  | 3.864297620  |
| N386 | 0.967790972   | -4.530489429  | 4.651237734  |
| N387 | 1.838878663   | -2.386092150  | 4.388156112  |
| N388 | 6.943463410   | -7.942893418  | 5.735470975  |
| N389 | -0.536383548  | -0.041417432  | -7.034548068 |
| N390 | 3.457170344   | -1.709827875  | -5.051312962 |
| N391 | -2.390437400  | 1.397487126   | -5.847309937 |
| N392 | -5.004654672  | 1.208908310   | -6.730344985 |
| N393 | -6.090723208  | -0.725405512  | -5.082227868 |
| N394 | -5.862024022  | 0.127462388   | -2.387541973 |
| N395 | -2.728595299  | 2.928928573   | -1.597414446 |
| N396 | -1.352763532  | 1.268726291   | -1.488372482 |
| N397 | -7.990758584  | 1.709361409   | -1.586104824 |
| N398 | -10.597209023 | 5.126186403   | -3.596191719 |
| N399 | -12.295158921 | 5.581731795   | -2.242302495 |
| N400 | 2.775194512   | -0.628356192  | 9.601571358  |
| N401 | 0.219669778   | 5.418217508   | 8.331248888  |
| N402 | 0.021211844   | 8.074454956   | 5.986565961  |
| N403 | -0.836112264  | 7.876646278   | 3.349976874  |
| N404 | -2.305043540  | 7.784215615   | -1.365296080 |
| N405 | -2.463884415  | 10.105914719  | -1.116182454 |
| N406 | -4.382470937  | 8.806770831   | -1.139039164 |
| N407 | -2.252034697  | 5.420541824   | 3.122724177  |
| N408 | -4.272342037  | 5.790781337   | 5.042948676  |
| N409 | -6.173210997  | 7.888583419   | 4.944532211  |
| N410 | -4.850657768  | 9.280559128   | 2.218064591  |
| N411 | -8.702981686  | 7.680987540   | 3.856313236  |
| N412 | 10.878083652  | 3.821456338   | -3.369256853 |
| N413 | 7.367152488   | 3.581886176   | -2.589188100 |
| N414 | 4.829880611   | 5.193077191   | -1.999559572 |
| N415 | 5.012204138   | 6.713321728   | 0.413883006  |
| N416 | 6.337082434   | 4.787833676   | -6.994198847 |
| N417 | 3.473783816   | 5.023140031   | -6.787523344 |
| N418 | 12.136733147  | -1.087681770  | 0.920240704  |
| N419 | 8.250951066   | -1.180802127  | -1.056751720 |
| N420 | 9.526419884   | -0.487472378  | -2.721618626 |
| N421 | 11.325980100  | -3.671189745  | 2.642760653  |
| N422 | -1.063680642  | 0.700435614   | 1.639807807  |
| N423 | 0.061681498   | 0.772657762   | 1.513103957  |
| O424 | -2.359438366  | -4.500570524  | -6.757489315 |
| O425 | -5.711431653  | -4.802657299  | -5.330562891 |
| O426 | -4.843095195  | -8.216599614  | -4.139316279 |
| O427 | -2.272854044  | -6.626361938  | -2.065931559 |
| O428 | -4.209843395  | -4.056745403  | -0.547328093 |
| O429 | -6.689422418  | -6.522280184  | 0.458007603  |
| O430 | -4.595386188  | -9.975831213  | 1.190949446  |
| O431 | -0.573802360  | -7.941669994  | 2.273683936  |
| O432 | -2.678519945  | -4.890930335  | 4.442210172  |
| O433 | -6.137926870  | -5.499815390  | 5.478810229  |
| O434 | -6.735898098  | -8.968639095  | 5.982934574  |
| O435 | 8.261957442   | -9.224816768  | 1.794155160  |
| O436 | 5.389000953   | -9.616974432  | 5.466402990  |
| O437 | 6.864811629   | -6.867842909  | 9.170398485  |
| O438 | -3.180023305  | -0.325950328  | -4.556486379 |
| O439 | 2.235660999   | -0.437393217  | -6.487599075 |
| O440 | -5.666537080  | 2.946852484   | -5.397427469 |
| O441 | -3.719103355  | 4.757986522   | -4.913528923 |

|  |                           |               |              |              |
|--|---------------------------|---------------|--------------|--------------|
|  | O442                      | -8.154326654  | -0.491425312 | -6.072296059 |
|  | O443                      | -7.192838342  | -1.600399061 | -1.715631606 |
|  | O444                      | -7.544060827  | 1.222737617  | 0.601971696  |
|  | O445                      | -11.066015525 | 1.921318979  | 0.153089737  |
|  | O446                      | 3.811271491   | -3.991524283 | 9.752457739  |
|  | O447                      | -2.797310468  | 0.732411816  | 6.747637774  |
|  | O448                      | -1.709853622  | 6.676539879  | 6.478101413  |
|  | O449                      | -2.354135993  | 9.574313146  | 3.659488130  |
|  | O450                      | -3.375543469  | 6.365311790  | 1.361636637  |
|  | O451                      | -5.556634495  | 4.218238933  | 3.974615061  |
|  | O452                      | -2.517525676  | 3.254908683  | 5.329884192  |
|  | O453                      | -6.940454924  | 7.354185481  | 7.033911218  |
|  | O454                      | -9.255585195  | 9.802993423  | 4.482699327  |
|  | O455                      | -7.039258809  | 9.743645385  | 1.760096460  |
|  | O456                      | -12.281204383 | 7.512540029  | 3.981452753  |
|  | O457                      | -6.081203873  | 6.338657187  | -1.695856156 |
|  | O458                      | 8.521384162   | 2.793093100  | -4.413107220 |
|  | O459                      | 5.091553011   | 5.338848385  | -4.270955244 |
|  | O460                      | 3.722301553   | 8.355732442  | -0.522480482 |
|  | O461                      | 6.957857063   | 8.424773421  | 2.923042184  |
|  | O462                      | 3.441306459   | 4.255810639  | -8.936568285 |
|  | O463                      | 6.020421777   | -0.612935711 | -6.488508062 |
|  | O464                      | 7.261441604   | 0.539529893  | -5.035164747 |
|  | O465                      | 1.011447326   | 7.396062425  | -5.769578014 |
|  | O466                      | 11.074013954  | -1.795675186 | 3.888180938  |
|  | O467                      | 12.712817046  | -4.129416327 | 5.918618216  |
|  | O468                      | 3.407930610   | -4.091980254 | -3.116885833 |
|  | O469                      | 4.314840248   | -6.101089918 | -3.401352302 |
|  | O470                      | 10.489583584  | -5.989320914 | -2.410175464 |
|  | O471                      | 9.277855496   | -5.453471741 | -4.238643385 |
|  | O472                      | 7.051957409   | -3.418962401 | 0.810341832  |
|  | O473                      | 6.948593026   | -5.657658492 | 0.580433723  |
|  | O474                      | 6.033621564   | -2.932349866 | -1.560933545 |
|  | O475                      | 8.386932528   | -5.786103013 | 4.554351475  |
|  | O476                      | 6.732477073   | -3.682056269 | 3.624162481  |
|  | O477                      | -3.677348563  | 5.431810634  | -2.258003046 |
|  | O478                      | 11.523565396  | -6.351809414 | 0.481037567  |
|  | O479                      | 9.073763047   | -6.573915309 | 1.964932094  |
|  | S480                      | 0.951087491   | 5.090034323  | 4.266421988  |
|  | S481                      | 1.813600552   | 3.310476143  | 1.383682971  |
|  | S482                      | 5.014763303   | 0.026399314  | -1.381316016 |
|  | S483                      | 1.581969230   | 1.190144171  | 3.824354428  |
|  | S484                      | 1.733121181   | 0.358860104  | -0.873823387 |
|  | S485                      | 5.851127311   | 3.366877285  | 0.441017102  |
|  | S486                      | 4.276529348   | -2.396101311 | 1.240068212  |
|  | S487                      | 4.426162167   | 3.307398511  | 3.878555743  |
|  | S488                      | 7.089890195   | -0.085235180 | 1.633125777  |
|  | S489                      | 4.708138129   | -0.626591618 | 4.496043636  |
|  | <b>1(c)</b>               |               |              |              |
|  | Fe( 139)                  | 0.565         | -2.506       |              |
|  | Fe( 140)                  | 0.350         | -0.118       |              |
|  | Fe( 141)                  | 0.550         | -2.730       |              |
|  | Fe( 142)                  | 0.567         | 2.804        |              |
|  | Fe( 143)                  | 0.610         | 3.213        |              |
|  | Fe( 144)                  | 0.486         | 1.325        |              |
|  | Fe( 145)                  | 0.207         | -0.622       |              |
|  | <b>S=1</b>                |               |              |              |
|  | bm2cnx2b6x262n2xz11.car_1 |               |              |              |
|  | C1                        | -7.928072068  | -5.046680199 | -0.751990154 |
|  | C2                        | -7.931021376  | -6.252505308 | -1.698964895 |
|  | C3                        | -9.150822794  | -3.063382142 | 0.025409560  |
|  | C4                        | -9.059345801  | -3.264930312 | 1.537162293  |
|  | C5                        | -9.508360890  | -4.711796445 | 3.453173214  |
|  | C6                        | -8.082866375  | -4.957451245 | 3.959687825  |
|  | C7                        | -5.820557040  | -5.709186788 | 3.394625760  |
|  | C8                        | -5.052104430  | -4.384238004 | 3.420236239  |
|  | C9                        | -4.663463999  | -2.214659665 | 2.378204982  |
|  | C10                       | -5.034976376  | -1.315107314 | 3.566993909  |
|  | C11                       | -6.746751457  | -0.570967037 | 5.125973562  |

|     |              |               |              |
|-----|--------------|---------------|--------------|
| C12 | -6.273120460 | -1.110762339  | 6.482461965  |
| C13 | -6.221065438 | -3.028293422  | 8.005216137  |
| C14 | -4.795896087 | -3.497989400  | 8.318374872  |
| C15 | -2.723935908 | -4.492640137  | 7.446655047  |
| C16 | -1.540697138 | -3.614407693  | 7.029493495  |
| C17 | -0.880456852 | -1.542376176  | 5.832614654  |
| C18 | -0.945932944 | -0.166786365  | 6.521599656  |
| C19 | -0.994257819 | -1.467528458  | 4.286611067  |
| C20 | -0.078942542 | -0.394595132  | 3.688906218  |
| C21 | -0.708237882 | -2.836740104  | 3.657361266  |
| C22 | -2.300320127 | 1.822961610   | 7.053018290  |
| C23 | -2.584587694 | 1.680797345   | 8.561487976  |
| C24 | -3.376164395 | 2.662903546   | 6.323218608  |
| C25 | -3.640735463 | 3.979688928   | 7.062684607  |
| C26 | -2.956218003 | 2.940836006   | 4.873107453  |
| C27 | -3.922141788 | 0.703461508   | 10.330775546 |
| C28 | -2.723055485 | 0.362558474   | 11.194748174 |
| C29 | 4.061234958  | -11.125983537 | 6.336598540  |
| C30 | 4.829511471  | -9.960590371  | 5.712539536  |
| C31 | 5.204936374  | -7.499241535  | 5.925023587  |
| C32 | 6.161553824  | -7.070792154  | 7.054989571  |
| C33 | 4.115943111  | -6.442149371  | 5.675281423  |
| C34 | 4.677818429  | -5.075248678  | 5.275978260  |
| C35 | 3.577623210  | -4.158820257  | 4.744283482  |
| C36 | 3.647194076  | -1.663716054  | 4.546036666  |
| C37 | 8.431521796  | -6.324511629  | 7.597346394  |
| C38 | 8.749005107  | -4.844510985  | 7.557239818  |
| C39 | -4.777123571 | -2.506381558  | -2.637064332 |
| C40 | -5.177211569 | -1.027966457  | -2.491268874 |
| C41 | -3.294398476 | -2.632542171  | -2.213260419 |
| C42 | -2.770615808 | -4.070154798  | -2.007470922 |
| C43 | -2.161967224 | -4.719142653  | -3.249762139 |
| C44 | -5.511712014 | 1.060054589   | -3.733108599 |
| C45 | -6.932292159 | 1.541341264   | -3.404976405 |
| C46 | -5.028300816 | 1.656900231   | -5.068807551 |
| C47 | -9.126366329 | 0.924059882   | -2.500829119 |
| C48 | -9.060362413 | 1.099915083   | -0.975563371 |
| C49 | -7.718480625 | 0.827531562   | 1.068596284  |
| C50 | -6.690894293 | 1.871193419   | 1.514187923  |
| C51 | -4.827433010 | 3.359086635   | 0.941258405  |
| C52 | -5.469757486 | 4.696635670   | 1.380200940  |
| C53 | -3.922202371 | 3.736099034   | -0.242572627 |
| C54 | -3.054764111 | 2.666936166   | -0.821212473 |
| C55 | -2.566291882 | 1.475887123   | -0.345963037 |
| C56 | -1.698767268 | 1.801978068   | -2.368092996 |
| C57 | -7.177724656 | 6.360638498   | 0.739462583  |
| C58 | -7.649587880 | 6.646004225   | 2.163650549  |
| C59 | -8.368705544 | 6.384870544   | -0.247465759 |
| C60 | -8.841475383 | 7.736220086   | -0.697643863 |
| C61 | -9.015087773 | 8.916946217   | -0.000813368 |
| C62 | -9.583658672 | 9.183575532   | -2.126119474 |
| C63 | 7.521371409  | 1.451116030   | 6.087010013  |
| C64 | 8.392980306  | 0.226258893   | 6.299468376  |
| C65 | 6.200057663  | 0.960342494   | 5.442399476  |
| C66 | 5.204912391  | 2.074585240   | 5.219752933  |
| C67 | 4.272365746  | 2.431860903   | 6.212430364  |
| C68 | 5.192328933  | 2.799885093   | 4.015102553  |
| C69 | 3.351882548  | 3.465527420   | 6.008820909  |
| C70 | 4.288879102  | 3.841333049   | 3.801217790  |
| C71 | 3.366783834  | 4.172283454   | 4.798857807  |
| C72 | 6.035127013  | 6.892190982   | -0.194324099 |



|      |              |              |              |
|------|--------------|--------------|--------------|
| C73  | 5.114984109  | 7.918554901  | -0.866767401 |
| C74  | 5.245510637  | 5.615722371  | 0.118709374  |
| C75  | 4.604408557  | 9.154622394  | -2.929209756 |
| C76  | 3.226386326  | 8.663072693  | -3.376442689 |
| C77  | 1.716230091  | 6.722733501  | -3.618252885 |
| C78  | 0.786341381  | 6.663155113  | -2.386545381 |
| C79  | 1.956141356  | 5.343569002  | -4.259198008 |
| C80  | 0.730924531  | 4.556848489  | -4.735297209 |
| C81  | -0.034720118 | 5.114253496  | -5.948792349 |
| C82  | -1.413144740 | 7.192437173  | -6.023197761 |
| C83  | 0.534155165  | 6.332201939  | 0.012657062  |
| C84  | 0.270429758  | 7.714700996  | 0.637684007  |
| C85  | 1.112112508  | 5.413031871  | 1.101089273  |
| C86  | 1.286514250  | 9.844123184  | 1.283220599  |
| C87  | 0.758692054  | 11.173383614 | 0.751133443  |
| C88  | -0.283742569 | 12.400943629 | -1.108293711 |
| C89  | -1.703725635 | 12.863040080 | -0.716895771 |
| C90  | -0.137735349 | 12.319619478 | -2.642573790 |
| C91  | -1.041401706 | 11.254112860 | -3.252481810 |
| C92  | -3.874188684 | 12.219460209 | 0.225383479  |
| C93  | -4.019708146 | 13.335402841 | 1.252736033  |
| C94  | -4.561291407 | 10.930905930 | 0.752552378  |
| C95  | -4.576890407 | 9.831770613  | -0.282591735 |
| C96  | -5.573121937 | 9.801015044  | -1.271788286 |
| C97  | -3.564883120 | 8.858468760  | -0.329562366 |
| C98  | -5.548081146 | 8.848532505  | -2.293165656 |
| C99  | -3.508755762 | 7.911610658  | -1.358208348 |
| C100 | -4.502755612 | 7.925525885  | -2.335512471 |
| C101 | 6.211458908  | -4.462478752 | -7.455798471 |
| C102 | 4.719882594  | -4.208267029 | -7.320805918 |
| C103 | 3.011266619  | -2.619905112 | -6.461748607 |
| C104 | 2.645394960  | -1.321828303 | -7.192794858 |
| C105 | 2.970534606  | 1.106659855  | -7.231374084 |
| C106 | 4.087529862  | 2.138239965  | -7.098311314 |
| C107 | 6.236128092  | 2.793579121  | -6.113178054 |
| C108 | 7.450420973  | 2.540697533  | -6.985666334 |
| C109 | -0.309709498 | -4.090381339 | -9.284402140 |
| C110 | -1.371109015 | -2.982438057 | -9.319532843 |
| C111 | -0.209914930 | -4.658242204 | -7.850420471 |
| C112 | 0.528735244  | -6.009576820 | -7.820469375 |
| C113 | 0.875745627  | -6.382320741 | -6.396237495 |
| C114 | -1.924244203 | -0.647633123 | -8.847355648 |
| C115 | -1.319949505 | 0.617111700  | -9.424471307 |
| C116 | -2.615807847 | -0.463733428 | -7.474364276 |
| C117 | -1.612235075 | -0.415354264 | -6.355362467 |
| C118 | -0.935729535 | 0.774447641  | -6.037089905 |
| C119 | -1.234066932 | -1.602253403 | -5.702110526 |
| C120 | 0.140051792  | 0.753933419  | -5.142588444 |
| C121 | -0.155268126 | -1.620056921 | -4.813632087 |
| C122 | 0.554989117  | -0.444446720 | -4.556222029 |
| C123 | 8.660216691  | -6.598996280 | -1.886102511 |
| C124 | 9.514223038  | -6.689577279 | -0.610243413 |
| C125 | 7.219597503  | -7.085035112 | -1.664509281 |
| C126 | 6.261220727  | -6.845093422 | -2.791330981 |
| C127 | 6.238421513  | -7.486703097 | -4.013565126 |
| C128 | 4.472949023  | -6.160696558 | -3.849205514 |
| C129 | 10.196868582 | -7.913300240 | 1.375366994  |
| C130 | 11.668713981 | -7.725136935 | 1.084732411  |
| C131 | 0.383104040  | -6.922156029 | 0.536269336  |
| C132 | 1.745792831  | -6.655723341 | 1.114137344  |
| C133 | 2.919194905  | -6.996390891 | 0.107572528  |

|       |               |               |              |
|-------|---------------|---------------|--------------|
| C134  | 2.830250607   | -8.494663983  | -0.307173760 |
| C135  | 4.047212903   | -8.959591572  | -1.124456853 |
| C136  | 4.122360949   | -10.449829761 | -1.304632451 |
| C137  | 4.250676040   | -6.839672422  | 0.902560646  |
| C138  | 4.118926680   | -0.920058895  | -1.137240838 |
| Fe139 | 4.612615591   | -2.208830561  | -2.532111679 |
| Fe140 | 2.410928698   | 0.276106929   | -0.492239208 |
| Fe141 | 5.307182145   | 0.318039331   | -0.033593662 |
| Fe142 | 4.489425374   | 0.383184567   | -2.521782118 |
| Fe143 | 4.314628010   | 2.579671780   | -1.017436654 |
| Fe144 | 5.079380656   | -2.185735099  | -0.026149515 |
| Fe145 | 2.594898538   | -2.314667037  | -0.626733509 |
| H146  | -6.230006733  | -7.132592012  | -0.997997439 |
| H147  | -5.998059636  | -6.274278174  | -2.367132603 |
| H148  | -9.776300819  | -4.473764441  | -1.454408174 |
| H149  | -8.345548559  | -5.939896262  | -2.670449342 |
| H150  | -8.649633545  | -6.979203553  | -1.282194462 |
| H151  | -8.343529284  | -2.364990453  | -0.238828963 |
| H152  | -10.007137571 | -5.080839103  | 1.391751053  |
| H153  | -10.111173142 | -2.581856107  | -0.202444508 |
| H154  | -10.116750757 | -5.603405136  | 3.652877177  |
| H155  | -7.527552408  | -5.660979286  | 2.114001895  |
| H156  | -9.912288190  | -3.877276597  | 4.041185505  |
| H157  | -3.571320156  | -2.327202064  | 2.402944898  |
| H158  | -5.925965148  | -3.797211545  | 1.638617444  |
| H159  | -5.372042063  | -6.374689094  | 2.644325709  |
| H160  | -6.360049445  | 0.450403308   | 5.027736159  |
| H161  | -7.010036915  | -1.931891215  | 3.478214999  |
| H162  | -5.700532830  | -6.169764301  | 4.382900277  |
| H163  | -4.939668797  | -1.715930899  | 1.437797883  |
| H164  | -6.900962276  | -3.021450598  | 5.982694605  |
| H165  | -7.844673316  | -0.531541336  | 5.128872652  |
| H166  | -1.381371851  | -3.614753045  | 4.043407488  |
| H167  | -0.839507977  | -2.786739323  | 2.565294885  |
| H168  | 0.331889967   | -3.145956810  | 3.847118386  |
| H169  | -2.036209971  | -1.192132563  | 4.054158914  |
| H170  | -6.885459821  | -3.898594043  | 8.111618111  |
| H171  | -2.812816806  | 2.015784458   | 4.297071311  |
| H172  | -4.160801694  | 0.354522051   | 8.235374213  |
| H173  | -4.004788420  | 3.819272981   | 8.087495475  |
| H174  | -0.239346960  | -0.331048146  | 2.604105262  |
| H175  | 0.981271050   | -0.640911122  | 3.839389856  |
| H176  | 7.278542072   | 1.856956725   | 7.088038744  |
| H177  | -3.725835820  | 3.542674861   | 4.367689815  |
| H178  | -4.397719542  | 4.568538222   | 6.523952925  |
| H179  | -2.012466163  | 3.509939293   | 4.851057875  |
| H180  | -2.722227697  | 4.584323114   | 7.121159289  |
| H181  | -4.313207932  | 2.077179593   | 6.314096169  |
| H182  | -1.337372317  | 2.352474397   | 7.003437351  |
| H183  | -2.868528762  | 0.159866439   | 5.815270696  |
| H184  | -0.267193108  | 0.603563254   | 4.111467736  |
| H185  | 1.424780926   | 4.461266832   | 0.636759961  |
| H186  | 0.298137359   | 5.205859754   | 1.813790098  |
| H187  | 2.231582303   | 5.735417285   | 2.683876112  |
| H188  | 1.860607337   | 5.304817979   | 5.270639059  |
| H189  | 4.272413072   | 4.372049931   | 2.848155423  |
| H190  | 5.876689713   | 2.521664669   | 3.211137002  |
| H191  | 4.254407759   | 1.889435750   | 7.162327869  |
| H192  | -2.851613769  | -2.298094522  | 6.203285033  |
| H193  | -2.642545786  | -5.429896754  | 6.877149415  |
| H194  | -2.592739779  | -4.731114328  | 8.510040873  |

|      |              |              |               |
|------|--------------|--------------|---------------|
| H195 | -4.455640506 | -3.979768418 | 6.323765923   |
| H196 | -6.483328530 | -2.300985054 | 8.783974961   |
| H197 | 2.624361690  | 3.717770244  | 6.784853503   |
| H198 | 0.100119882  | -1.953163988 | 6.105894175   |
| H199 | -4.393688091 | 1.620588298  | 10.720647332  |
| H200 | -4.642986371 | -0.123315040 | 10.433786047  |
| H201 | -1.903733259 | -0.183282527 | 10.670437125  |
| H202 | 9.358070233  | -6.899048128 | 7.447332667   |
| H203 | -0.645533107 | -5.965393184 | -3.840578626  |
| H204 | 0.446397407  | -8.662273861 | 1.368613123   |
| H205 | -0.124334597 | -6.790187685 | -8.236242383  |
| H206 | 1.440891788  | -5.960075958 | -8.432455400  |
| H207 | -1.215693216 | -4.795971744 | -7.424023063  |
| H208 | -0.543490941 | 0.439495514  | -10.204583111 |
| H209 | -0.736106215 | -4.876657828 | -9.926349459  |
| H210 | -2.671650147 | -2.112009954 | -2.959056283  |
| H211 | -3.589160536 | -4.726895352 | -1.665677660  |
| H212 | -0.012282894 | -1.590430693 | -8.587498292  |
| H213 | -2.719426969 | -0.917005777 | -9.572903346  |
| H214 | 1.465637709  | -3.017394595 | -9.294359732  |
| H215 | -0.664021871 | -5.608895067 | -2.115471078  |
| H216 | 0.301966042  | -3.918879412 | -7.215245641  |
| H217 | 1.549048047  | -4.468666785 | -10.067445978 |
| H218 | -5.880736533 | -3.467988345 | -4.097835220  |
| H219 | -3.181298259 | -2.091937088 | -1.262495999  |
| H220 | 2.689873494  | -5.690786351 | -6.724074844  |
| H221 | -2.027625822 | -4.070064311 | -1.197999431  |
| H222 | -4.232051462 | 3.001855238  | 1.794556308   |
| H223 | -2.723888471 | 0.967942800  | 0.597852627   |
| H224 | -8.676494629 | 1.128642849  | 1.511733145   |
| H225 | -7.167818087 | 0.239671642  | -0.909106223  |
| H226 | -7.005998482 | 4.329671692  | 0.076523971   |
| H227 | -8.835114467 | 9.189185338  | 1.033847841   |
| H228 | -8.016028293 | 5.741451000  | 2.705550987   |
| H229 | -9.201385087 | 5.796954844  | 0.178109457   |
| H230 | -6.433612346 | 7.121035784  | 0.454363973   |
| H231 | -9.933833833 | 9.676562315  | -3.029592681  |
| H232 | -3.277165373 | 4.558882276  | 0.108091159   |
| H233 | -4.549710834 | 4.156421196  | -1.045757249  |
| H234 | -9.711021709 | 10.798702717 | -0.744906404  |
| H235 | -8.050396710 | 5.853182708  | -1.157754164  |
| H236 | -5.721673551 | 1.855225507  | -0.311700550  |
| H237 | -7.446012101 | -0.137761928 | 1.520876983   |
| H238 | -9.511106550 | 1.863921187  | -2.916495710  |
| H239 | -1.120418179 | 1.643443315  | -3.272986103  |
| H240 | -9.852558328 | 0.131906283  | -2.726083230  |
| H241 | 8.954154478  | 2.870768511  | 5.730569023   |
| H242 | 7.562198017  | 3.127123467  | 4.916173528   |
| H243 | 2.327191411  | 5.993799126  | -1.155256775  |
| H244 | -0.451680098 | 5.936692941  | -0.271748621  |
| H245 | 2.095862035  | 8.388290134  | -0.014348554  |
| H246 | -2.701815849 | 3.640254743  | -2.743170423  |
| H247 | -3.839752243 | 4.170181083  | -4.419652560  |
| H248 | -3.693887601 | 5.501815640  | -3.565320096  |
| H249 | -3.985286734 | 1.357358937  | -5.242735046  |
| H250 | -5.646270632 | 1.282243927  | -5.902131257  |
| H251 | 0.920456672  | 12.145075830 | -2.886207409  |
| H252 | -0.437257940 | 13.291829507 | -3.055686071  |
| H253 | 0.580560832  | 9.935033484  | -3.557180779  |
| H254 | -1.022148311 | 9.316671758  | -3.897253960  |
| H255 | -0.879387844 | 8.691172175  | -7.312413083  |

|      |              |               |              |
|------|--------------|---------------|--------------|
| H256 | -0.420645573 | 4.282582265   | -6.558318880 |
| H257 | -6.336659220 | 8.830335851   | -3.049498273 |
| H258 | -2.792207735 | 8.822002535   | 0.443506576  |
| H259 | -2.924408584 | 7.564297219   | -4.670603676 |
| H260 | 2.491780732  | 4.708326941   | -3.535407305 |
| H261 | 3.720402421  | 6.728584808   | -2.876639158 |
| H262 | 0.033466896  | 4.376886654   | -3.902509863 |
| H263 | -7.593201764 | -0.373668963  | -3.262097820 |
| H264 | 5.166162630  | 9.448780021   | -3.825882971 |
| H265 | -5.194293863 | -0.987774490  | -4.492968417 |
| H266 | 2.638091439  | 5.495735140   | -5.112159866 |
| H267 | -2.677643026 | 7.205787175   | -1.413976670 |
| H268 | -5.902663552 | 3.313674428   | -4.527866934 |
| H269 | 4.429821114  | 10.058836048  | -2.329652352 |
| H270 | -0.193239457 | 7.145789770   | -7.678784716 |
| H271 | -2.786064879 | 8.702826652   | -5.955228519 |
| H272 | -4.224977056 | -3.595602274  | -4.294879069 |
| H273 | -5.389862043 | -3.051084699  | -1.894477236 |
| H274 | -6.383821185 | 10.532527070  | -1.253599582 |
| H275 | -4.896173730 | 1.507057359   | -2.933669144 |
| H276 | 1.207742600  | 7.389027888   | -4.328100427 |
| H277 | 0.655053300  | 5.681935330   | -6.585897348 |
| H278 | 1.115123213  | 3.572236646   | -5.029998756 |
| H279 | -1.860375315 | 5.550183468   | -4.923444411 |
| H280 | 0.729048353  | 9.638187843   | 2.209263991  |
| H281 | 0.165423493  | 10.290408912  | -1.002250664 |
| H282 | 0.381780169  | 13.198047887  | -0.746814335 |
| H283 | 2.338225120  | 10.012528052  | 1.555976926  |
| H284 | -2.093764508 | 11.028987700  | 0.089937956  |
| H285 | 6.750068689  | -3.505317983  | -7.514738309 |
| H286 | 6.521114966  | -4.946203068  | -6.505974313 |
| H287 | 8.640033521  | -5.529478234  | -2.142038716 |
| H288 | 7.445146630  | -5.607254496  | -8.607662629 |
| H289 | 5.879105706  | -6.082412290  | -8.642015625 |
| H290 | 5.935688946  | 4.877340559   | 0.547794669  |
| H291 | 5.855126354  | 7.755446156   | 1.643067420  |
| H292 | 6.158203775  | 7.716658819   | -2.628665391 |
| H293 | 4.455430499  | 5.844598440   | 0.8471179713 |
| H294 | 7.196106030  | 8.231729741   | 0.839564458  |
| H295 | 6.537274318  | 2.789784529   | -5.054274293 |
| H296 | 6.861331915  | 6.640675010   | -0.878083588 |
| H297 | 3.490028445  | -6.354333083  | 6.578807814  |
| H298 | 5.766589624  | -7.663010506  | 4.997551889  |
| H299 | 5.204907713  | 0.966785375   | -5.784344817 |
| H300 | 3.756221827  | 0.307940047   | 4.018930343  |
| H301 | 2.753979764  | 0.994499915   | -8.301474828 |
| H302 | 0.137935608  | -2.550038960  | -4.320511221 |
| H303 | 2.073745520  | 1.564376126   | -6.780413476 |
| H304 | 2.819426871  | -3.960561204  | 5.512678626  |
| H305 | 3.687612022  | -0.323841966  | -5.755952540 |
| H306 | 3.058231866  | -4.651162116  | 3.904717306  |
| H307 | 3.475982194  | -6.829601419  | 4.866032818  |
| H308 | 5.433977627  | -5.194038431  | 4.485743469  |
| H309 | 5.171406885  | -4.591193628  | 6.134328780  |
| H310 | -3.309215398 | -1.305769710  | -7.333677982 |
| H311 | 3.989365247  | -8.816649911  | 7.121035344  |
| H312 | 3.278039218  | -11.395918786 | 5.611615586  |
| H313 | 1.417501596  | -0.434036056  | -3.889601475 |
| H314 | 4.064709100  | -11.016178616 | 8.394290236  |
| H315 | 2.592943141  | -11.357004313 | 7.759740963  |
| H316 | 4.633497610  | -2.952480825  | 3.364614489  |

|       |              |               |              |
|-------|--------------|---------------|--------------|
| H317  | 0.680946492  | 1.666270561   | -4.888099427 |
| H318  | -1.781379594 | -2.526782989  | -5.897068737 |
| H319  | 7.313431289  | -10.100090736 | 1.412618849  |
| H320  | 7.242121775  | -8.172212980  | -1.469891992 |
| H321  | 5.980352878  | -8.259375112  | 2.301601309  |
| H322  | 6.836286575  | -10.884880475 | 0.172275642  |
| H323  | 7.276365569  | 1.855012686   | -7.849455788 |
| H324  | 6.152857343  | -5.182818620  | 1.701842865  |
| H325  | 1.899361067  | -7.216234473  | 2.047753862  |
| H326  | 5.112103797  | -2.446219050  | -6.352161677 |
| H327  | 2.761831051  | -9.100779882  | 0.609622657  |
| H328  | 4.778493958  | -7.343669054  | -5.575026428 |
| H329  | 3.537544038  | -5.678016216  | -4.104344403 |
| H330  | 4.760278298  | -11.978766724 | 6.375319640  |
| H331  | 4.425189988  | -0.788565049  | 2.843730729  |
| H332  | 7.707654487  | -5.885402222  | 3.380915194  |
| H333  | 6.902496385  | -3.851070346  | 1.973552336  |
| H334  | 7.643079883  | -6.721506578  | 5.633393779  |
| H335  | 3.040705769  | -2.107760335  | 6.459767672  |
| H336  | 3.178494896  | -11.930088457 | -2.008387389 |
| H337  | 4.019382116  | -8.485184104  | -2.116414840 |
| H338  | 4.982248658  | -8.660987040  | -0.637095104 |
| H339  | 1.914059482  | -8.643221474  | -0.896477803 |
| H340  | 2.912822967  | -2.493374090  | -5.372615711 |
| H341  | -1.234783028 | 1.707308494   | -6.523473123 |
| H342  | -3.208303171 | 0.461502959   | -7.533002088 |
| H343  | 1.818795985  | -5.579817991  | 1.318180170  |
| H344  | 7.706286540  | -7.439683757  | 3.421161091  |
| H345  | 6.382494739  | -9.271964518  | 3.409967056  |
| H346  | 2.598414647  | -0.535310127  | 5.913889829  |
| H347  | 6.914747656  | -8.211968476  | -4.451046609 |
| H348  | 6.818310523  | -6.611115874  | -0.760686293 |
| H349  | 2.333625336  | -3.404805613  | -6.802007376 |
| H350  | 5.858813950  | 3.800993672   | -6.352215895 |
| H351  | 5.769419069  | 0.198138138   | 6.109369710  |
| H352  | 6.441182634  | 0.475105264   | 4.483002005  |
| H353  | 10.234927536 | -6.898530589  | -3.166288545 |
| H354  | 9.479845667  | -8.285444417  | -2.737634965 |
| H355  | 10.072308457 | -8.937216694  | 1.762175523  |
| H356  | 8.683432504  | -8.514191169  | -0.000932597 |
| H357  | 11.979029821 | -8.001731813  | 0.047734167  |
| H358  | 9.876567258  | -7.217887276  | 2.167521288  |
| H359  | 9.018247919  | -0.056378244  | 5.418097158  |
| H360  | -3.112285593 | 13.535772538  | 1.870049190  |
| H361  | 8.052417206  | -6.542555397  | 8.610817624  |
| H362  | 7.924601674  | -4.192988061  | 7.178118986  |
| H363  | -4.387676544 | 12.548960096  | -0.693055344 |
| H364  | -4.044159429 | 10.596447383  | 1.665357963  |
| H365  | -5.587078337 | 11.206044388  | 1.037687744  |
| H366  | 1.447209922  | -3.182174156  | -0.144409918 |
| H367  | -5.230103848 | 7.048357479   | -3.917673509 |
| H368  | 2.387748291  | -1.116756235  | 0.540646915  |
| H369  | 0.074362758  | -1.290043984  | -0.194496825 |
| H370  | -1.133655536 | 0.132073421   | -1.271741091 |
| Mo371 | 4.212847775  | -4.524930453  | -1.076270879 |
| N372  | -6.652151087 | -6.909356433  | -1.903155844 |
| N373  | -9.060972124 | -4.288628345  | -0.755375090 |
| N374  | -9.578626033 | -4.416072988  | 2.031285260  |
| N375  | -7.233603315 | -5.550858737  | 3.083426188  |
| N376  | -5.313195773 | -3.518093316  | 2.406847384  |
| N377  | -6.322021792 | -1.374443770  | 3.990304394  |

|      |              |               |              |
|------|--------------|---------------|--------------|
| N378 | -6.449802225 | -2.441032584  | 6.694776519  |
| N379 | -4.046544179 | -3.921992243  | 7.261203181  |
| N380 | -1.865332256 | -2.456800480  | 6.397541619  |
| N381 | -2.121141448 | 0.518253338   | 6.412221233  |
| N382 | -3.565350630 | 0.815795789   | 8.927026119  |
| N383 | 3.433333961  | -10.794242004 | 7.621378868  |
| N384 | 4.593790440  | -8.769409324  | 6.293514196  |
| N385 | 4.111906267  | -2.886542821  | 4.243346348  |
| N386 | 2.940979934  | -1.463151230  | 5.682303334  |
| N387 | 3.840259173  | -0.651969130  | 3.692080031  |
| N388 | 7.407886972  | -6.722369878  | 6.649575320  |
| N389 | -4.996570088 | -2.962954337  | -4.013573915 |
| N390 | -1.077494545 | -5.489578673  | -3.042792866 |
| N391 | -5.331124986 | -0.375587574  | -3.671867468 |
| N392 | -7.856931745 | 0.599655202   | -3.126986886 |
| N393 | -7.915409998 | 0.679305041   | -0.362685615 |
| N394 | -5.832050161 | 2.365992063   | 0.563051851  |
| N395 | -2.497980700 | 2.838122480   | -2.084743643 |
| N396 | -1.742107626 | 0.963790971   | -1.328423194 |
| N397 | -6.585960805 | 5.030632045   | 0.682622717  |
| N398 | -9.200673991 | 7.916576519   | -2.023554934 |
| N399 | -9.485926268 | 9.824282622   | -0.927137654 |
| N400 | 8.215451160  | 2.394337326   | 5.207036449  |
| N401 | 6.618801841  | 7.412828036   | 1.051059250  |
| N402 | 5.396078123  | 8.208025797   | -2.169832854 |
| N403 | 3.009254682  | 7.331468381   | -3.317014668 |
| N404 | -1.171565178 | 5.963095481   | -5.575553384 |
| N405 | -0.692598486 | 7.736412718   | -7.022999704 |
| N406 | -2.345540571 | 7.963452866   | -5.413076046 |
| N407 | 1.361211479  | 6.376631705   | -1.188762190 |
| N408 | 1.209875409  | 8.680976001   | 0.410353174  |
| N409 | 0.137253155  | 11.157992939  | -0.464985512 |
| N410 | -0.437219422 | 10.073993068  | -3.546546545 |
| N411 | -2.473622684 | 11.959545531  | -0.064849830 |
| N412 | 6.485797055  | -5.257436869  | -8.656254736 |
| N413 | 4.377186455  | -3.031736522  | -6.761986463 |
| N414 | 3.203792089  | -0.210853733  | -6.672825274 |
| N415 | 5.170131428  | 1.833689262   | -6.335767326 |
| N416 | 0.947030236  | -3.657852503  | -9.908111325 |
| N417 | -0.973266363 | -1.742549281  | -8.913060193 |
| N418 | 9.311052965  | -7.309805200  | -3.003592497 |
| N419 | 5.144725821  | -6.012562912  | -2.709454867 |
| N420 | 5.108406067  | -7.040350207  | -4.662893943 |
| N421 | 9.386914596  | -7.796723193  | 0.173181162  |
| N422 | 0.340468235  | 1.815438758   | 0.889223164  |
| N423 | 1.134317493  | 1.208097787   | 0.351921269  |
| O424 | -6.978514437 | -4.793405374  | 0.013131593  |
| O425 | -8.546579831 | -2.397075590  | 2.261845461  |
| O426 | -7.753793226 | -4.646598761  | 5.115906358  |
| O427 | -4.245058149 | -4.116585919  | 4.324433920  |
| O428 | -4.195115311 | -0.566419899  | 4.090911558  |
| O429 | -5.802842123 | -0.349728097  | 7.345071329  |
| O430 | -4.400082518 | -3.516475798  | 9.491287111  |
| O431 | -0.382478003 | -3.990866126  | 7.257821838  |
| O432 | 0.031366537  | 0.281029583   | 7.141071583  |
| O433 | -1.950216009 | 2.335767523   | 9.405221103  |
| O434 | -2.670111331 | 0.598027268   | 12.392599760 |
| O435 | 5.575055197  | -10.164655419 | 4.730726630  |
| O436 | 5.779139797  | -7.064892704  | 8.238218128  |
| O437 | 9.813151294  | -4.375480919  | 7.927264908  |
| O438 | -5.338221171 | -0.471421886  | -1.382890716 |

|  |                                    |               |               |              |
|--|------------------------------------|---------------|---------------|--------------|
|  | O439                               | -2.655854519  | -4.557487363  | -4.389308636 |
|  | O440                               | -7.159653990  | 2.768081227   | -3.346194470 |
|  | O441                               | -5.073660324  | 3.092678582   | -5.028840822 |
|  | O442                               | -10.026779392 | 1.589068477   | -0.379154464 |
|  | O443                               | -6.670917876  | 2.263778169   | 2.682689024  |
|  | O444                               | -4.921839345  | 5.442446905   | 2.195914357  |
|  | O445                               | -7.673526777  | 7.753068947   | 2.673860172  |
|  | O446                               | 8.409490839   | -0.428762690  | 7.331824067  |
|  | O447                               | 2.482401377   | 5.198619665   | 4.527057907  |
|  | O448                               | 4.174309144   | 8.464063068   | -0.262207323 |
|  | O449                               | 2.395084102   | 9.495507181   | -3.792885201 |
|  | O450                               | -0.430819236  | 6.886120957   | -2.522455317 |
|  | O451                               | -0.731632940  | 7.893581604   | 1.343636527  |
|  | O452                               | 2.210257820   | 6.052525896   | 1.757905093  |
|  | O453                               | 0.882265650   | 12.199792870  | 1.431516787  |
|  | O454                               | -2.091680369  | 14.009144948  | -0.986570644 |
|  | O455                               | -2.258577763  | 11.444016832  | -3.406013308 |
|  | O456                               | -5.064554990  | 13.942401645  | 1.425787222  |
|  | O457                               | -4.410195686  | 6.999864022   | -3.388926276 |
|  | O458                               | 3.890237476   | -5.079419113  | -7.686993476 |
|  | O459                               | 1.901478523   | -1.318725817  | -8.198525136 |
|  | O460                               | 3.946881386   | 3.227828701   | -7.678856855 |
|  | O461                               | 8.541596032   | 3.046370979   | -6.780919177 |
|  | O462                               | -2.539379126  | -3.221746263  | -9.667065791 |
|  | O463                               | 0.072106548   | -6.872169720  | -5.609230891 |
|  | O464                               | 2.129486339   | -6.098848132  | -5.990871319 |
|  | O465                               | -1.665761735  | 1.750677655   | -9.122714688 |
|  | O466                               | 10.362784386  | -5.819767216  | -0.338252343 |
|  | O467                               | 12.487428034  | -7.378993315  | 1.924758029  |
|  | O468                               | -0.264890382  | -6.147611993  | -0.152540338 |
|  | O469                               | -0.164090950  | -8.151929328  | 0.802987041  |
|  | O470                               | 5.050262811   | -11.168924518 | -0.942464613 |
|  | O471                               | 3.033934255   | -10.962151858 | -1.937954770 |
|  | O472                               | 5.094955887   | -5.988719876  | 0.413167662  |
|  | O473                               | 4.466908161   | -7.551419111  | 1.909736455  |
|  | O474                               | 2.868636335   | -6.152822956  | -0.980330826 |
|  | O475                               | 8.092632151   | -6.648159388  | 3.881387433  |
|  | O476                               | 6.671256830   | -4.701896439  | 2.394927925  |
|  | O477                               | -3.178327144  | 4.741116555   | -3.934325088 |
|  | O478                               | 7.635350073   | -10.725141491 | 0.715195952  |
|  | O479                               | 6.766108429   | -8.775668932  | 2.640843318  |
|  | S480                               | 4.423052679   | 4.893892797   | -1.376415549 |
|  | S481                               | 2.610217010   | 1.720527448   | -2.377940458 |
|  | S482                               | 2.765684322   | -3.494343146  | -2.612844010 |
|  | S483                               | 3.813560895   | 1.627227218   | 0.956249385  |
|  | S484                               | 0.784447809   | -1.156460205  | -1.354224327 |
|  | S485                               | 5.193692417   | -0.905132871  | -4.246876636 |
|  | S486                               | 3.553636337   | -3.475266054  | 0.956293467  |
|  | S487                               | 6.281530185   | 1.541083782   | -1.622613289 |
|  | S488                               | 6.261328534   | -3.362637100  | -1.476964149 |
|  | S489                               | 6.281461500   | -1.059629779  | 1.426085282  |
|  | <b>1(d)</b>                        |               |               |              |
|  | Fe( 139)                           | 0.565         | -2.509        |              |
|  | Fe( 140)                           | 0.352         | -0.190        |              |
|  | Fe( 141)                           | 0.549         | -2.675        |              |
|  | Fe( 142)                           | 0.546         | 2.584         |              |
|  | Fe( 143)                           | 0.505         | 1.703         |              |
|  | Fe( 144)                           | 0.487         | 1.504         |              |
|  | bm2cnx2b6x2hn2n2xd135tfadtf0.car_2 |               |               |              |
|  | C1                                 | -2.650643146  | -4.308431621  | -7.952003838 |
|  | C2                                 | -1.624004618  | -4.443082049  | -9.081841118 |
|  | C3                                 | -4.967583900  | -3.749841445  | -7.362829207 |
|  | C4                                 | -5.328283446  | -4.954569414  | -6.497172352 |
|  | C5                                 | -5.502024884  | -7.382986224  | -6.312472840 |
|  | C6                                 | -4.496010038  | -7.646681580  | -5.186992032 |
|  | C7                                 | -2.202146371  | -7.332094628  | -4.386514504 |
|  | C8                                 | -2.399003821  | -6.314884334  | -3.258015057 |

Fe( 145) 0.207 -0.592  
S=0

|     |               |               |              |
|-----|---------------|---------------|--------------|
| C9  | -2.995914014  | -4.037207408  | -2.628702612 |
| C10 | -4.213269856  | -4.354977359  | -1.746842406 |
| C11 | -6.458577808  | -5.272083124  | -1.596234447 |
| C12 | -6.291190750  | -6.521834345  | -0.719735274 |
| C13 | -5.682890967  | -8.894466335  | -0.655234602 |
| C14 | -4.476731352  | -9.193570540  | 0.242090620  |
| C15 | -2.073083792  | -8.862403345  | 0.635530258  |
| C16 | -1.563206839  | -7.747887608  | 1.552637110  |
| C17 | -1.845269132  | -5.375728774  | 2.217004243  |
| C18 | -2.926291578  | -4.945192756  | 3.225009389  |
| C19 | -1.414958855  | -4.241219782  | 1.246630909  |
| C20 | -1.157304857  | -2.918906762  | 1.973516189  |
| C21 | -0.184996691  | -4.660429399  | 0.433680528  |
| C22 | -5.259560137  | -4.230726924  | 3.582347016  |
| C23 | -5.928241498  | -5.454972712  | 4.240719426  |
| C24 | -6.272548328  | -3.338548641  | 2.824034096  |
| C25 | -7.492192071  | -3.025499144  | 3.698803691  |
| C26 | -5.610202672  | -2.038648984  | 2.349004748  |
| C27 | -6.987077720  | -7.625060876  | 3.968762211  |
| C28 | -6.219095654  | -8.270184911  | 5.106395526  |
| C29 | 7.129870904   | -11.303181391 | 1.332631308  |
| C30 | 7.247279260   | -9.930465742  | 1.998131397  |
| C31 | 6.033277885   | -8.351806015  | 3.511249920  |
| C32 | 6.091928321   | -8.701412832  | 5.010471059  |
| C33 | 4.709451989   | -7.657399695  | 3.143621849  |
| C34 | 4.470595820   | -6.345876545  | 3.896878633  |
| C35 | 3.333666804   | -5.544935362  | 3.261734004  |
| C36 | 2.001735709   | -3.715982814  | 4.335910662  |
| C37 | 7.129890867   | -8.169230997  | 7.165106072  |
| C38 | 6.517763408   | -7.084730962  | 8.026362492  |
| C39 | -1.119698644  | -0.671805303  | -5.859527633 |
| C40 | -2.324795284  | 0.141032934   | -5.357867779 |
| C41 | -0.111357092  | -0.786182328  | -4.692350647 |
| C42 | 1.026852770   | -1.810026695  | -4.884302721 |
| C43 | 2.292219195   | -1.256978590  | -5.537739185 |
| C44 | -3.324285505  | 2.382281281   | -5.343169306 |
| C45 | -4.764054091  | 2.209283165   | -5.845996838 |
| C46 | -2.847200419  | 3.830279668   | -5.574023829 |
| C47 | -6.344594010  | 0.761348997   | -7.033543609 |
| C48 | -6.943295233  | -0.210671403  | -6.005446788 |
| C49 | -6.531586062  | -1.607830115  | -4.019444878 |
| C50 | -6.543038412  | -1.033340556  | -2.601275895 |
| C51 | -5.823297080  | 0.716978224   | -1.039714864 |
| C52 | -7.222494690  | 1.194130108   | -0.583313532 |
| C53 | -4.947167250  | 1.978529580   | -0.985287168 |
| C54 | -3.488953482  | 1.823574570   | -1.266361560 |
| C55 | -2.614497809  | 0.768081406   | -1.202171009 |
| C56 | -1.440936824  | 2.583691740   | -1.721015530 |
| C57 | -9.207899488  | 2.459967615   | -1.321611248 |
| C58 | -10.228689377 | 1.547701709   | -0.644862861 |
| C59 | -9.743081668  | 2.967916882   | -2.680554495 |
| C60 | -10.708321099 | 4.116023996   | -2.633457267 |
| C61 | -11.766818042 | 4.379034135   | -1.785562775 |
| C62 | -11.576373854 | 5.982593526   | -3.303915117 |
| C63 | 2.507702443   | -2.020947235  | 9.241485800  |
| C64 | 3.786178560   | -2.828664816  | 9.364746497  |
| C65 | 2.058735312   | -2.120835035  | 7.759624005  |
| C66 | 0.766113070   | -1.389200338  | 7.488346436  |
| C67 | -0.480433861  | -2.021871807  | 7.647962421  |
| C68 | 0.772860599   | -0.042890587  | 7.084388664  |
| C69 | -1.678476289  | -1.339393076  | 7.410424159  |



|      |               |              |              |
|------|---------------|--------------|--------------|
| C70  | -0.413261999  | 0.654241607  | 6.853701755  |
| C71  | -1.639820422  | 0.003966660  | 7.015918540  |
| C72  | 0.549214058   | 5.888676383  | 6.964407746  |
| C73  | -0.480735986  | 6.899757394  | 6.449326108  |
| C74  | 0.602258735   | 4.669507629  | 6.033903651  |
| C75  | -0.835163696  | 9.117376816  | 5.450212829  |
| C76  | -1.416844871  | 8.856753125  | 4.060493960  |
| C77  | -1.331340371  | 7.437766737  | 2.036656064  |
| C78  | -2.416077806  | 6.342486868  | 2.135193487  |
| C79  | -0.123590070  | 7.018911163  | 1.178349536  |
| C80  | -0.393847544  | 6.597419248  | -0.269388224 |
| C81  | -0.850429847  | 7.694962422  | -1.244868199 |
| C82  | -3.034423511  | 8.899562578  | -1.225864434 |
| C83  | -3.261758944  | 4.359427120  | 3.274409662  |
| C84  | -4.475505486  | 4.788096763  | 4.119796042  |
| C85  | -2.681339186  | 3.072248624  | 3.881834281  |
| C86  | -5.197619941  | 5.952371802  | 6.145692216  |
| C87  | -6.163002480  | 7.133285462  | 6.087281583  |
| C88  | -6.959686073  | 9.108321128  | 4.857086715  |
| C89  | -8.409635148  | 8.887444566  | 4.373873771  |
| C90  | -6.252845699  | 10.181251392 | 4.002256324  |
| C91  | -6.086682500  | 9.736627309  | 2.553261298  |
| C92  | -9.977324405  | 7.381476788  | 3.235544834  |
| C93  | -11.100092190 | 7.380782754  | 4.265934128  |
| C94  | -9.922584898  | 6.010861852  | 2.508766925  |
| C95  | -8.925920692  | 6.011279759  | 1.372937559  |
| C96  | -9.289417853  | 6.521099804  | 0.116321251  |
| C97  | -7.604316290  | 5.568635008  | 1.553182929  |
| C98  | -8.361576202  | 6.613129775  | -0.923107263 |
| C99  | -6.653327740  | 5.678759844  | 0.532985868  |
| C100 | -7.046859599  | 6.206253515  | -0.695060836 |
| C101 | 9.797637802   | 3.438965285  | -2.471202063 |
| C102 | 8.505063448   | 3.253399557  | -3.245947242 |
| C103 | 6.030676966   | 3.403891828  | -3.124406623 |
| C104 | 5.279469091   | 4.738775677  | -3.197928214 |
| C105 | 4.123396285   | 6.458331325  | -1.892102283 |
| C106 | 4.300833969   | 7.261131889  | -0.607015480 |
| C107 | 5.158152552   | 7.388633084  | 1.687351327  |
| C108 | 6.512181001   | 8.050855964  | 1.848596057  |
| C109 | 5.443691515   | 3.819620144  | -7.657045075 |
| C110 | 4.038459030   | 4.397432890  | -7.860332204 |
| C111 | 5.328963909   | 2.427560291  | -6.995120828 |
| C112 | 6.644230150   | 1.637645532  | -7.112992360 |
| C113 | 6.614126710   | 0.425162839  | -6.209839212 |
| C114 | 2.122624154   | 5.541386577  | -6.863842612 |
| C115 | 2.043117384   | 6.918629624  | -6.234551264 |
| C116 | 1.021703614   | 4.553424767  | -6.407937842 |
| C117 | 1.329030393   | 3.977184899  | -5.052677937 |
| C118 | 1.018674728   | 4.681557993  | -3.877913356 |
| C119 | 2.064525085   | 2.782965133  | -4.951481030 |
| C120 | 1.497515048   | 4.229650265  | -2.642767398 |
| C121 | 2.542236862   | 2.335336587  | -3.718782281 |
| C122 | 2.285894465   | 3.079891717  | -2.563385338 |
| C123 | 10.835016628  | -1.522178351 | 1.488163996  |
| C124 | 11.061690004  | -2.342056358 | 2.769545227  |
| C125 | 9.988694728   | -2.277183686 | 0.450154503  |
| C126 | 9.551857794   | -1.483169308 | -0.743574316 |
| C127 | 10.340192024  | -1.044625085 | -1.788541464 |
| C128 | 8.216233717   | -0.597744444 | -2.231181993 |
| C129 | 11.563380900  | -4.474288522 | 3.829389625  |
| C130 | 12.617171944  | -3.873941255 | 4.733878579  |

|       |              |              |              |
|-------|--------------|--------------|--------------|
| C131  | 4.078775026  | -4.995254377 | -2.622048402 |
| C132  | 4.719603067  | -4.972086925 | -1.261980332 |
| C133  | 6.138897605  | -4.271373838 | -1.255660986 |
| C134  | 7.084910409  | -4.994943509 | -2.260018819 |
| C135  | 8.542327435  | -4.511872780 | -2.158509542 |
| C136  | 9.518097532  | -5.377170897 | -2.904025180 |
| C137  | 6.741507711  | -4.495271877 | 0.163831541  |
| C138  | 3.958218017  | 0.940018628  | 1.591806945  |
| Fe139 | 5.562814349  | 1.159893616  | 0.496744708  |
| Fe140 | 1.788126476  | 0.956330099  | 1.399050169  |
| Fe141 | 3.710072844  | 1.160462926  | 3.599481818  |
| Fe142 | 3.991180772  | 2.866936205  | 1.655770141  |
| Fe143 | 2.183610028  | 3.301177872  | 3.587180343  |
| Fe144 | 4.999161449  | -0.556450409 | 2.303027117  |
| Fe145 | 3.464687505  | -0.654022726 | 0.233267113  |
| H146  | -0.108091009 | -5.243761841 | -7.975967344 |
| H147  | 0.048525397  | -3.638491583 | -8.224457478 |
| H148  | -4.092701180 | -3.764275600 | -9.315466119 |
| H149  | -1.762412776 | -3.609452862 | -9.789054879 |
| H150  | -1.885496606 | -5.358015426 | -9.640692366 |
| H151  | -4.672840547 | -2.949091408 | -6.669633870 |
| H152  | -4.923165312 | -6.242736685 | -8.044341034 |
| H153  | -5.869151845 | -3.425987666 | -7.900201706 |
| H154  | -5.493627436 | -8.239131082 | -6.999757615 |
| H155  | -3.026727244 | -6.675779226 | -6.242236633 |
| H156  | -6.493795464 | -7.326352522 | -5.845326889 |
| H157  | -2.139711207 | -3.924138806 | -1.949990763 |
| H158  | -2.752715037 | -4.803840581 | -4.626438900 |
| H159  | -1.219466399 | -7.175805195 | -4.852537181 |
| H160  | -6.731199987 | -4.442716961 | -0.931470981 |
| H161  | -5.278657044 | -5.050519863 | -3.383031556 |
| H162  | -2.214242164 | -8.327661051 | -3.927582651 |
| H163  | -3.155752427 | -3.078324149 | -3.142535374 |
| H164  | -5.454204213 | -7.561160619 | -2.304159007 |
| H165  | -7.288198368 | -5.445128300 | -2.296177584 |
| H166  | -0.365808716 | -5.579482788 | -0.142258231 |
| H167  | 0.089005633  | -3.863216569 | -0.274959482 |
| H168  | 0.683187315  | -4.825414320 | 1.090915284  |
| H169  | -2.252299377 | -4.084644999 | 0.546908880  |
| H170  | -5.716475868 | -9.674946812 | -1.429475188 |
| H171  | -4.769173317 | -2.222594104 | 1.665383286  |
| H172  | -6.208160329 | -6.397431208 | 2.402354961  |
| H173  | -8.030940670 | -3.933840535 | 4.003746848  |
| H174  | -0.949269947 | -2.125269230 | 1.243276870  |
| H175  | -0.279455009 | -2.979545891 | 2.632071461  |
| H176  | 1.738327148  | -2.514033861 | 9.865962032  |
| H177  | -6.347123999 | -1.416407233 | 1.819221081  |
| H178  | -8.194923751 | -2.385346391 | 3.146203559  |
| H179  | -5.236760891 | -1.458124946 | 3.208632500  |
| H180  | -7.189615124 | -2.490410855 | 4.612551733  |
| H181  | -6.618396537 | -3.902301805 | 1.938695948  |
| H182  | -4.839271522 | -3.658926735 | 4.422792354  |
| H183  | -4.279284927 | -4.567569871 | 1.700783959  |
| H184  | -2.017805786 | -2.592373604 | 2.575913992  |
| H185  | -1.724765959 | 2.839188806  | 3.382245255  |
| H186  | -3.394486126 | 2.259284610  | 3.672252686  |
| H187  | -2.620190713 | 2.356096133  | 5.712807102  |
| H188  | -3.566893698 | 0.156267696  | 6.823484509  |
| H189  | -0.390029713 | 1.690790208  | 6.517236090  |
| H190  | 1.723579821  | 0.464556317  | 6.911921702  |
| H191  | -0.519816437 | -3.070126475 | 7.956459445  |

|      |               |              |              |
|------|---------------|--------------|--------------|
| H192 | -2.997763402  | -6.509177868 | 0.809727739  |
| H193 | -1.263219842  | -9.085648286 | -0.074981794 |
| H194 | -2.233662897  | -9.750505264 | 1.259930619  |
| H195 | -3.233601571  | -8.013669113 | -0.934854607 |
| H196 | -6.571860464  | -9.002860050 | -0.020931949 |
| H197 | -2.637824853  | -1.851754350 | 7.526915605  |
| H198 | -0.984794692  | -5.672070538 | 2.831477141  |
| H199 | -8.003875301  | -7.381234286 | 4.316239240  |
| H200 | -7.075002973  | -8.376564672 | 3.168418555  |
| H201 | -5.116399332  | -8.106380337 | 5.084043226  |
| H202 | 8.195667947   | -8.277017134 | 7.417440266  |
| H203 | 4.335453707   | -1.402713421 | -5.475731888 |
| H204 | 4.854338045   | -6.743028728 | -2.878700851 |
| H205 | 6.770896230   | 1.294818897  | -8.150168937 |
| H206 | 7.498628542   | 2.279976522  | -6.854348991 |
| H207 | 4.522586367   | 1.847703375  | -7.470108381 |
| H208 | 2.998939874   | 7.491969017  | -6.269569801 |
| H209 | 5.815777908   | 3.669598257  | -8.681877772 |
| H210 | 0.312753933   | 0.212300147  | -4.495988855 |
| H211 | 0.679631955   | -2.652149555 | -5.507893289 |
| H212 | 3.985635619   | 5.081618414  | -5.898988695 |
| H213 | 1.952141449   | 5.737409096  | -7.942565434 |
| H214 | 6.137522356   | 4.872395659  | -6.007021340 |
| H215 | 3.500386314   | -2.381615967 | -4.272050433 |
| H216 | 5.044614601   | 2.560941653  | -5.939553173 |
| H217 | 7.307343113   | 4.471604898  | -7.094889500 |
| H218 | -0.860826255  | -0.470947215 | -7.899224677 |
| H219 | -0.682281885  | -1.079915143 | -3.799634451 |
| H220 | 7.679215286   | 1.451465283  | -4.912450308 |
| H221 | 1.285986910   | -2.246872294 | -3.909600502 |
| H222 | -5.491502159  | -0.028134960 | -0.301611976 |
| H223 | -2.772683857  | -0.276072171 | -0.958340437 |
| H224 | -7.564463888  | -1.903474593 | -4.243626059 |
| H225 | -5.084016186  | -0.485555776 | -5.115726929 |
| H226 | -7.660768408  | 1.609937668  | -2.539247333 |
| H227 | -12.160630530 | 3.854112138  | -0.922792213 |
| H228 | -10.187834175 | 0.485148946  | -0.986446181 |
| H229 | -10.169008598 | 2.116882198  | -3.241666710 |
| H230 | -9.002262525  | 3.309428258  | -0.650934075 |
| H231 | -11.795745583 | 6.899541867  | -3.843381824 |
| H232 | -5.064355060  | 2.396684191  | 0.028360009  |
| H233 | -5.364965409  | 2.726578538  | -1.678746046 |
| H234 | -13.096698860 | 6.053814267  | -1.814656166 |
| H235 | -8.877801051  | 3.318355854  | -3.265679337 |
| H236 | -5.161036039  | 0.430638133  | -3.066970311 |
| H237 | -5.929394656  | -2.528601685 | -4.013662521 |
| H238 | -7.019834334  | 1.625054215  | -7.083915336 |
| H239 | -0.602144927  | 3.226864763  | -1.971170975 |
| H240 | -6.347190333  | 0.272737144  | -8.016768170 |
| H241 | 2.860587062   | -0.546511617 | 10.621766177 |
| H242 | 1.995085917   | -0.041061310 | 9.329706093  |
| H243 | -1.334532989  | 5.298366561  | 3.573697736  |
| H244 | -3.664082043  | 4.112195553  | 2.281143543  |
| H245 | -3.297239631  | 6.050608612  | 5.225812783  |
| H246 | -3.101612528  | 3.915896965  | -1.753568060 |
| H247 | -3.645537170  | 5.282447819  | -3.241380484 |
| H248 | -4.617551387  | 5.595437419  | -2.023354017 |
| H249 | -1.838197105  | 3.952564107  | -5.157070865 |
| H250 | -2.812145562  | 4.047165636  | -6.654953018 |
| H251 | -5.286443569  | 10.418679181 | 4.470027028  |
| H252 | -6.881514780  | 11.081307396 | 4.014305323  |

|      |               |               |              |
|------|---------------|---------------|--------------|
| H253 | -4.020999760  | 9.370994640   | 2.814156064  |
| H254 | -4.728197003  | 8.896957096   | 1.282076046  |
| H255 | -3.049858205  | 10.929588246  | -0.968637368 |
| H256 | -0.443364241  | 7.497169403   | -2.248165980 |
| H257 | -8.663497914  | 7.003728347   | -1.897752483 |
| H258 | -7.288467716  | 5.126438392   | 2.502849702  |
| H259 | -4.848504668  | 7.916137824   | -1.246874618 |
| H260 | 0.388465777   | 6.180116744   | 1.676632575  |
| H261 | -0.126563926  | 7.276312700   | 3.791960543  |
| H262 | -1.093959924  | 5.748040236   | -0.303340395 |
| H263 | -4.198359514  | 0.701429257   | -7.085290064 |
| H264 | -0.269047821  | 10.057650388  | 5.408218317  |
| H265 | -1.630021572  | 1.607327945   | -6.528521728 |
| H266 | 0.582830224   | 7.865411498   | 1.177712859  |
| H267 | -5.613419121  | 5.395904196   | 0.711092555  |
| H268 | -4.631634841  | 4.405992026   | -5.046556391 |
| H269 | -1.690446117  | 9.270144050   | 6.123089133  |
| H270 | -1.521741464  | 10.276256179  | -1.437297316 |
| H271 | -4.932755200  | 9.631596925   | -1.398213471 |
| H272 | 0.504425191   | -0.125700756  | -6.999879123 |
| H273 | -1.512451776  | -1.685358756  | -6.062810500 |
| H274 | -10.315500198 | 6.854067827   | -0.057887931 |
| H275 | -3.405365424  | 2.231349940   | -4.253334452 |
| H276 | -1.835014456  | 8.303062038   | 1.585539355  |
| H277 | -0.441507568  | 8.660816760   | -0.922497060 |
| H278 | 0.565551987   | 6.218293275   | -0.644629940 |
| H279 | -2.810459239  | 6.922642053   | -1.615004286 |
| H280 | -5.818683466  | 5.048778314   | 6.236764339  |
| H281 | -5.441086742  | 7.696067013   | 4.251430128  |
| H282 | -7.064874172  | 9.503124582   | 5.878141545  |
| H283 | -4.624334525  | 6.062498018   | 7.076707018  |
| H284 | -7.935354428  | 6.996453985   | 3.772263563  |
| H285 | 9.668427027   | 4.218144115   | -1.706631261 |
| H286 | 9.963899461   | 2.483260340   | -1.931587977 |
| H287 | 10.286836631  | -0.624795053  | 1.809215760  |
| H288 | 11.773299531  | 3.726739528   | -2.886114159 |
| H289 | 10.910581588  | 3.139360941   | -4.148556318 |
| H290 | 1.389457773   | 3.996746083   | 6.400046073  |
| H291 | -0.738055587  | 5.103109665   | 8.337513851  |
| H292 | 1.032319337   | 8.205205854   | 5.954867325  |
| H293 | -0.365188965  | 4.148165154   | 6.066671009  |
| H294 | 0.266332631   | 6.227674029   | 8.970062690  |
| H295 | 4.989523167   | 6.684621928   | 2.516600764  |
| H296 | 1.542975509   | 6.362495323   | 6.985841622  |
| H297 | 3.878487682   | -8.359569462  | 3.324714385  |
| H298 | 6.872028174   | -7.697201635  | 3.243827880  |
| H299 | 5.337995962   | 5.738144113   | 0.367280155  |
| H300 | 1.131108082   | -1.995021016  | 5.008716045  |
| H301 | 4.421160213   | 7.105030406   | -2.728187891 |
| H302 | 3.113148057   | 1.407762925   | -3.651026288 |
| H303 | 3.040402642   | 6.285073520   | -2.002274803 |
| H304 | 2.384769322   | -6.095991156  | 3.301247617  |
| H305 | 4.936650975   | 4.560200340   | -1.195425610 |
| H306 | 3.557307746   | -5.368734383  | 2.196269785  |
| H307 | 4.743285555   | -7.463220929  | 2.059156502  |
| H308 | 5.377481886   | -5.722956036  | 3.873561863  |
| H309 | 4.231898504   | -6.539354455  | 4.955164207  |
| H310 | 0.958862540   | 3.754357835   | -7.160311492 |
| H311 | 5.467199928   | -10.314758685 | 2.824674749  |
| H312 | 6.974180927   | -11.105155089 | 0.261197764  |
| H313 | 2.680518577   | 2.768357874   | -1.596923257 |

|       |               |               |              |
|-------|---------------|---------------|--------------|
| H314  | 6.324212073   | -12.693613326 | 2.621051739  |
| H315  | 5.674134467   | -12.742543868 | 1.117988579  |
| H316  | 3.891153891   | -3.545423178  | 3.680796007  |
| H317  | 1.275980274   | 4.776504799   | -1.725403683 |
| H318  | 2.270640958   | 2.198256968   | -5.850081196 |
| H319  | 10.685188334  | -6.493550515  | 0.980254557  |
| H320  | 10.575317295  | -3.138341676  | 0.082951130  |
| H321  | 8.327929786   | -6.136830324  | 1.483450723  |
| H322  | 11.224483261  | -6.230384210  | -0.441495701 |
| H323  | 7.077254002   | 8.204978225   | 0.896239675  |
| H324  | 6.897826091   | -3.596549659  | 2.651560038  |
| H325  | 4.822272849   | -5.988175806  | -0.853610789 |
| H326  | 7.428990992   | 3.813624087   | -1.593515960 |
| H327  | 7.051858511   | -6.076727293  | -2.052067299 |
| H328  | 9.737122378   | -0.104458171  | -3.617008272 |
| H329  | 7.340357447   | -0.267503926  | -2.775626647 |
| H330  | 8.120649683   | -11.780499533 | 1.425686695  |
| H331  | 2.660771935   | -1.764770562  | 4.210423820  |
| H332  | 7.841839068   | -4.994094173  | 4.356435719  |
| H333  | 6.587363415   | -2.763359438  | 3.924242091  |
| H334  | 7.480338020   | -7.173647962  | 5.287858987  |
| H335  | 1.149261461   | -5.497603820  | 4.907756821  |
| H336  | 9.941247605   | -6.026794292  | -4.629554239 |
| H337  | 8.610891743   | -3.485395066  | -2.546638540 |
| H338  | 8.874141549   | -4.501101214  | -1.114541019 |
| H339  | 6.712158767   | -4.823673281  | -3.280420278 |
| H340  | 5.487033429   | 2.682442845   | -2.494208597 |
| H341  | 0.436407132   | 5.604237703   | -3.941589120 |
| H342  | 0.068888248   | 5.104510503   | -6.413185326 |
| H343  | 4.083152362   | -4.371586945  | -0.599827154 |
| H344  | 8.727152230   | -6.069154833  | 3.663075030  |
| H345  | 8.813507472   | -7.539771069  | 1.946308621  |
| H346  | 0.096778941   | -4.136587601  | 4.995665247  |
| H347  | 11.412242844  | -1.091595615  | -1.943943941 |
| H348  | 9.096046218   | -2.684269311  | 0.939521763  |
| H349  | 6.119610809   | 3.009524359   | -4.138396429 |
| H350  | 4.395013996   | 8.181971529   | 1.751162742  |
| H351  | 1.946852555   | -3.188914473  | 7.518816439  |
| H352  | 2.863040048   | -1.713145853  | 7.126484137  |
| H353  | 12.627363115  | -0.529462784  | 1.613517513  |
| H354  | 12.707189201  | -1.897910041  | 0.720757931  |
| H355  | 11.940416076  | -5.455813023  | 3.500002973  |
| H356  | 11.292252731  | -4.150496876  | 1.741367355  |
| H357  | 13.382893116  | -3.248343720  | 4.216265471  |
| H358  | 10.635485595  | -4.643814024  | 4.399200124  |
| H359  | 4.706433099   | -2.276529931  | 9.056191583  |
| H360  | -10.779298169 | 7.220069997   | 5.322148357  |
| H361  | 6.623085725   | -9.114428639  | 7.426636531  |
| H362  | 5.703159450   | -6.495308474  | 7.539743494  |
| H363  | -10.211641140 | 8.168573198   | 2.500203133  |
| H364  | -9.678282052  | 5.223454274   | 3.238579665  |
| H365  | -10.933950258 | 5.805623403   | 2.129916808  |
| H366  | 2.917059968   | -1.780050046  | -0.626584726 |
| H367  | -6.511587012  | 6.621484517   | -2.523883873 |
| H368  | 2.201340710   | -0.753628709  | 1.310792984  |
| H369  | 0.883689680   | -0.632892437  | -0.739710301 |
| H370  | -0.459925608  | 0.769159592   | -1.442498198 |
| Mo371 | 6.085221592   | -1.525993248  | 0.019556942  |
| N372  | -0.230600227  | -4.511046217  | -8.679347490 |
| N373  | -3.919777103  | -4.001790170  | -8.341639602 |
| N374  | -5.223034779  | -6.176547497  | -7.074821964 |

|      |               |               |              |
|------|---------------|---------------|--------------|
| N375 | -3.220284340  | -7.248696476  | -5.422305514 |
| N376 | -2.726290275  | -5.052239230  | -3.636100954 |
| N377 | -5.275833392  | -4.925692613  | -2.367573118 |
| N378 | -5.714193185  | -7.598468347  | -1.315110770 |
| N379 | -3.302482355  | -8.586628565  | -0.088299669 |
| N380 | -2.247674597  | -6.575694332  | 1.494079424  |
| N381 | -4.149682719  | -4.625874632  | 2.712173080  |
| N382 | -6.292238927  | -6.472864994  | 3.418490526  |
| N383 | 6.014398578   | -12.108731541 | 1.842125599  |
| N384 | 6.181057974   | -9.582550992  | 2.744071838  |
| N385 | 3.159969464   | -4.230699822  | 3.893585368  |
| N386 | 0.970833617   | -4.530202878  | 4.658943248  |
| N387 | 1.850643599   | -2.387965536  | 4.405365822  |
| N388 | 6.947474996   | -7.946279589  | 5.743503613  |
| N389 | -0.527378099  | -0.031930157  | -7.038737998 |
| N390 | 3.459120338   | -1.722051568  | -5.051934591 |
| N391 | -2.383479482  | 1.405141529   | -5.850604570 |
| N392 | -5.000029478  | 1.215385427   | -6.727443802 |
| N393 | -6.081977998  | -0.718194708  | -5.076046419 |
| N394 | -5.853433276  | 0.133823938   | -2.381006781 |
| N395 | -2.725906465  | 2.939358171   | -1.596433290 |
| N396 | -1.362188810  | 1.268423928   | -1.497398180 |
| N397 | -7.984236865  | 1.712451215   | -1.580008166 |
| N398 | -10.600619407 | 5.124947141   | -3.578312881 |
| N399 | -12.303189849 | 5.570898469   | -2.227041951 |
| N400 | 2.785897077   | -0.630384366  | 9.605017673  |
| N401 | 0.233380024   | 5.431006905   | 8.327120641  |
| N402 | 0.024159224   | 8.075703022   | 5.975751269  |
| N403 | -0.843952758  | 7.865565470   | 3.344488705  |
| N404 | -2.309304776  | 7.792811230   | -1.365434328 |
| N405 | -2.460361113  | 10.112112492  | -1.089646713 |
| N406 | -4.383402156  | 8.818958436   | -1.129603750 |
| N407 | -2.258611790  | 5.405668075   | 3.108865927  |
| N408 | -4.267722422  | 5.779210821   | 5.037645641  |
| N409 | -6.164365094  | 7.886142906   | 4.946250284  |
| N410 | -4.854469991  | 9.272222023   | 2.221386927  |
| N411 | -8.695831123  | 7.665588795   | 3.862850798  |
| N412 | 10.883372495  | 3.817092985   | -3.381250617 |
| N413 | 7.375115784   | 3.580200449   | -2.589632211 |
| N414 | 4.848953055   | 5.207043151   | -2.009519840 |
| N415 | 5.010132153   | 6.711705404   | 0.411915638  |
| N416 | 6.338687691   | 4.787088820   | -7.010939248 |
| N417 | 3.476739263   | 5.024842293   | -6.787914994 |
| N418 | 12.120651862  | -1.079617137  | 0.913656833  |
| N419 | 8.220384904   | -1.188438928  | -1.038430934 |
| N420 | 9.480642939   | -0.487983935  | -2.711329686 |
| N421 | 11.341149991  | -3.669026254  | 2.638801776  |
| N422 | -1.104847083  | 0.625918686   | 1.558448388  |
| N423 | 0.020823845   | 0.753072031   | 1.482247429  |
| O424 | -2.364818645  | -4.506141442  | -6.756388185 |
| O425 | -5.711008265  | -4.800196895  | -5.325468507 |
| O426 | -4.844694285  | -8.220710391  | -4.142377092 |
| O427 | -2.275532587  | -6.636934075  | -2.065794673 |
| O428 | -4.218075195  | -4.085174878  | -0.535285526 |
| O429 | -6.709451996  | -6.539945193  | 0.450730054  |
| O430 | -4.601857756  | -9.987383210  | 1.184570028  |
| O431 | -0.569320652  | -7.945556970  | 2.266018449  |
| O432 | -2.681034124  | -4.899469457  | 4.440338854  |
| O433 | -6.132532795  | -5.504067072  | 5.465118763  |
| O434 | -6.746059144  | -8.972547177  | 5.955721741  |
| O435 | 8.264907727   | -9.233344051  | 1.801315314  |

|  |             |               |                           |                                        |
|--|-------------|---------------|---------------------------|----------------------------------------|
|  | O436        | 5.392526344   | -9.619896196              | 5.474598378                            |
|  | O437        | 6.864494545   | -6.863864918              | 9.175313923                            |
|  | O438        | -3.171560149  | -0.319442451              | -4.560681070                           |
|  | O439        | 2.244690445   | -0.435962667              | -6.482608819                           |
|  | O440        | -5.660438881  | 2.949201713               | -5.388458284                           |
|  | O441        | -3.714908814  | 4.763011313               | -4.910665343                           |
|  | O442        | -8.145731942  | -0.492194452              | -6.067624189                           |
|  | O443        | -7.179118679  | -1.598102575              | -1.709191141                           |
|  | O444        | -7.543411790  | 1.216379752               | 0.606834121                            |
|  | O445        | -11.051658964 | 1.924269528               | 0.171492256                            |
|  | O446        | 3.833924869   | -3.990496768              | 9.741703195                            |
|  | O447        | -2.784273476  | 0.733955245               | 6.755803995                            |
|  | O448        | -1.704981478  | 6.676532121               | 6.470788154                            |
|  | O449        | -2.350488667  | 9.574964117               | 3.647064964                            |
|  | O450        | -3.382610955  | 6.358196034               | 1.352186865                            |
|  | O451        | -5.561578552  | 4.209595207               | 3.976443691                            |
|  | O452        | -2.497410084  | 3.232277242               | 5.293061991                            |
|  | O453        | -6.918928441  | 7.357008294               | 7.041339243                            |
|  | O454        | -9.252847749  | 9.789214571               | 4.476460738                            |
|  | O455        | -7.041286329  | 9.739455839               | 1.759220118                            |
|  | O456        | -12.275519639 | 7.509858104               | 3.963100803                            |
|  | O457        | -6.069029608  | 6.349404740               | -1.696714975                           |
|  | O458        | 8.525383475   | 2.790328398               | -4.414900333                           |
|  | O459        | 5.111012422   | 5.340378661               | -4.281678802                           |
|  | O460        | 3.768801035   | 8.382194051               | -0.541512300                           |
|  | O461        | 6.960993357   | 8.411260032               | 2.924400359                            |
|  | O462        | 3.433834661   | 4.258476151               | -8.937205988                           |
|  | O463        | 6.015167752   | -0.610866721              | -6.482693673                           |
|  | O464        | 7.252509962   | 0.545319016               | -5.028850144                           |
|  | O465        | 1.025853807   | 7.411685287               | -5.768862027                           |
|  | O466        | 11.075972733  | -1.799551813              | 3.890292427                            |
|  | O467        | 12.691171151  | -4.111284010              | 5.931425729                            |
|  | O468        | 3.387906015   | -4.108294812              | -3.103303965                           |
|  | O469        | 4.305473799   | -6.113468233              | -3.384399468                           |
|  | O470        | 10.468175310  | -5.976080362              | -2.405597845                           |
|  | O471        | 9.257444029   | -5.443433704              | -4.236145502                           |
|  | O472        | 7.040495455   | -3.418724805              | 0.816923401                            |
|  | O473        | 6.955031164   | -5.658296127              | 0.577608669                            |
|  | O474        | 6.004492381   | -2.931835906              | -1.549311593                           |
|  | O475        | 8.397751188   | -5.789013273              | 4.558079938                            |
|  | O476        | 6.752188499   | -3.679784785              | 3.627500041                            |
|  | O477        | -3.668350801  | 5.431069802               | -2.253762963                           |
|  | O478        | 11.529706791  | -6.365519652              | 0.479121817                            |
|  | O479        | 9.080554805   | -6.584162379              | 1.966594916                            |
|  | S480        | 0.937472464   | 5.089821915               | 4.257487923                            |
|  | S481        | 1.787007254   | 3.287174997               | 1.366718681                            |
|  | S482        | 4.997419227   | 0.021924538               | -1.365171344                           |
|  | S483        | 1.515335955   | 1.182087935               | 3.804183513                            |
|  | S484        | 1.765536291   | 0.400616541               | -0.867605353                           |
|  | S485        | 5.818080456   | 3.377347679               | 0.440287216                            |
|  | S486        | 4.260687697   | -2.391899999              | 1.280427147                            |
|  | S487        | 4.387216524   | 3.283260584               | 3.891646118                            |
|  | S488        | 7.061626049   | -0.084341803              | 1.664277299                            |
|  | S489        | 4.681017744   | -0.652269447              | 4.472912789                            |
|  | <b>1(e)</b> |               |                           |                                        |
|  | Fe( 139)    | 0.548 2.381   | bm2cnx2b6x262n2x471.car_3 |                                        |
|  | Fe( 140)    | 0.269 0.190   | C1                        | -8.054412250 -4.894172318 0.298230252  |
|  | Fe( 141)    | 0.517 1.809   | C2                        | -8.173713110 -6.131411953 -0.598952778 |
|  | Fe( 142)    | 0.545 -2.627  | C3                        | -9.135868273 -2.835050519 1.087986081  |
|  |             |               | C4                        | -8.921492306 -2.973478761 2.594096907  |
|  |             |               | C5                        | -9.219277367 -4.323085993 4.605135363  |

Fe( 143) 0.604 3.117  
 Fe( 144) 0.492 -2.209  
 Fe( 145) 0.335 -1.038  
 S=1

|     |              |               |              |
|-----|--------------|---------------|--------------|
| C6  | -7.755515142 | -4.580682020  | 4.983086829  |
| C7  | -5.575680948 | -5.417843006  | 4.241671452  |
| C8  | -4.767121364 | -4.121841073  | 4.130238580  |
| C9  | -4.424588351 | -2.009879958  | 2.961523144  |
| C10 | -4.669114677 | -1.043881181  | 4.130743186  |
| C11 | -6.213814011 | -0.177850219  | 5.793589318  |
| C12 | -5.623683108 | -0.662860493  | 7.125226776  |
| C13 | -5.443177282 | -2.512597266  | 8.721911704  |
| C14 | -4.001639153 | -2.994394161  | 8.922079373  |
| C15 | -2.040659192 | -4.075149313  | 7.906289411  |
| C16 | -0.895966026 | -3.258585046  | 7.300208135  |
| C17 | -0.322556995 | -1.256316874  | 5.949269610  |
| C18 | -0.290939543 | 0.146817120   | 6.583072025  |
| C19 | -0.585790394 | -1.248007901  | 4.419012817  |
| C20 | 0.276820659  | -0.214919296  | 3.686256437  |
| C21 | -0.376305523 | -2.647451245  | 3.829192739  |
| C22 | -1.543701588 | 2.193870353   | 7.147999087  |
| C23 | -1.676671528 | 2.123460942   | 8.682369691  |
| C24 | -2.670231734 | 3.023205012   | 6.486110233  |
| C25 | -2.839005119 | 4.378320076   | 7.185122048  |
| C26 | -2.389635702 | 3.222403462   | 4.991293370  |
| C27 | -2.859067947 | 1.255129665   | 10.616796304 |
| C28 | -1.584534873 | 0.948481037   | 11.377083590 |
| C29 | 4.475830115  | -10.903520883 | 6.419388198  |
| C30 | 5.201376679  | -9.787286874  | 5.669425219  |
| C31 | 5.646101896  | -7.327558346  | 5.726646377  |
| C32 | 6.725179234  | -6.873264911  | 6.729161421  |
| C33 | 4.555871364  | -6.258235675  | 5.540828967  |
| C34 | 5.088404972  | -4.928643255  | 5.003229767  |
| C35 | 3.943527393  | -4.014099393  | 4.569027266  |
| C36 | 4.025336870  | -1.535419878  | 4.232931212  |
| C37 | 9.048893452  | -6.146881006  | 6.996537005  |
| C38 | 9.379799938  | -4.675526153  | 6.861738474  |
| C39 | -5.068263375 | -2.519011238  | -2.026377249 |
| C40 | -5.419362336 | -1.027204201  | -1.908005636 |
| C41 | -3.552205858 | -2.661256165  | -1.750884269 |
| C42 | -3.031959829 | -4.096301874  | -1.528392226 |
| C43 | -2.589215004 | -4.831774950  | -2.792755985 |
| C44 | -5.823647175 | 1.014706328   | -3.202795433 |
| C45 | -7.187442345 | 1.547039342   | -2.741815629 |
| C46 | -5.485434417 | 1.540803201   | -4.611996612 |
| C47 | -9.300982330 | 1.021674038   | -1.618109661 |
| C48 | -9.076179737 | 1.271081863   | -0.119117760 |
| C49 | -7.541319384 | 1.046412203   | 1.790719302  |
| C50 | -6.461193462 | 2.090379372   | 2.080420999  |
| C51 | -4.639011020 | 3.510322695   | 1.270729028  |
| C52 | -5.214785686 | 4.879732979   | 1.710774709  |
| C53 | -3.827307525 | 3.812036159   | 0.001170489  |
| C54 | -3.038098023 | 2.699309400   | -0.612692341 |
| C55 | -2.478498923 | 1.540210426   | -0.131547688 |
| C56 | -1.876332837 | 1.741112181   | -2.259137760 |
| C57 | -6.952728079 | 6.554726691   | 1.162061748  |
| C58 | -7.284059440 | 6.912042980   | 2.608163458  |
| C59 | -8.226839070 | 6.553814947   | 0.286131242  |
| C60 | -8.727625108 | 7.891855267   | -0.173701185 |
| C61 | -8.832064457 | 9.097757680   | 0.492307059  |
| C62 | -9.577203672 | 9.295807611   | -1.585033301 |
| C63 | 8.118177654  | 1.550070820   | 5.223775162  |
| C64 | 8.988809793  | 0.316977333   | 5.385063569  |
| C65 | 6.735401711  | 1.062842002   | 4.721832239  |
| C66 | 5.740790714  | 2.188683869   | 4.561460089  |



|      |              |              |              |
|------|--------------|--------------|--------------|
| C67  | 4.928188417  | 2.608872212  | 5.630533061  |
| C68  | 5.608719094  | 2.857903508  | 3.331866432  |
| C69  | 4.010449607  | 3.653844756  | 5.477695559  |
| C70  | 4.704840705  | 3.908061240  | 3.166360412  |
| C71  | 3.904722305  | 4.303354430  | 4.241014578  |
| C72  | 6.081838978  | 6.735348721  | -1.104091448 |
| C73  | 5.126891560  | 7.755237508  | -1.737050512 |
| C74  | 5.303053836  | 5.489973693  | -0.655469941 |
| C75  | 4.447441944  | 8.896896986  | -3.808453850 |
| C76  | 3.015249674  | 8.427750069  | -4.070415749 |
| C77  | 1.447926014  | 6.515542056  | -4.065888015 |
| C78  | 0.629386881  | 6.524268105  | -2.755542264 |
| C79  | 1.605953632  | 5.109068437  | -4.673486920 |
| C80  | 0.329926996  | 4.319278404  | -4.980514525 |
| C81  | -0.548823704 | 4.825734548  | -6.137840446 |
| C82  | -1.874863120 | 6.943210108  | -6.176625489 |
| C83  | 0.608283553  | 6.349153424  | -0.320087871 |
| C84  | 0.455453507  | 7.765003094  | 0.264258362  |
| C85  | 1.264404044  | 5.458807588  | 0.746135879  |
| C86  | 1.583395152  | 9.890554268  | 0.690652437  |
| C87  | 1.014901234  | 11.198715061 | 0.148196390  |
| C88  | -0.178239544 | 12.352323470 | -1.665718130 |
| C89  | -1.544951039 | 12.865295947 | -1.164447443 |
| C90  | -0.173617958 | 12.198945309 | -3.201304499 |
| C91  | -1.153932967 | 11.132997439 | -3.677723713 |
| C92  | -3.619433804 | 12.306274976 | 0.029282419  |
| C93  | -3.633060520 | 13.469823196 | 1.014295496  |
| C94  | -4.250768963 | 11.047981255 | 0.686241729  |
| C95  | -4.392271591 | 9.907698434  | -0.296087639 |
| C96  | -5.500284456 | 9.850670581  | -1.155158010 |
| C97  | -3.403547218 | 8.919039543  | -0.422131166 |
| C98  | -5.613373168 | 8.854864917  | -2.126782066 |
| C99  | -3.487051088 | 7.926666364  | -1.404905667 |
| C100 | -4.593054747 | 7.911541039  | -2.251606771 |
| C101 | 5.337566436  | -4.954588009 | -7.812350772 |
| C102 | 3.870623372  | -4.655179666 | -7.554091167 |
| C103 | 2.279149804  | -2.986258369 | -6.628547499 |
| C104 | 1.878031423  | -1.708584685 | -7.375688234 |
| C105 | 2.240931760  | 0.709971039  | -7.536861086 |
| C106 | 3.395299651  | 1.707486688  | -7.579148951 |
| C107 | 5.645323917  | 2.349441602  | -6.852544298 |
| C108 | 6.755970914  | 2.072513517  | -7.845220134 |
| C109 | -1.328682321 | -4.499476774 | -9.004918898 |
| C110 | -2.364308125 | -3.369037872 | -8.982954736 |
| C111 | -1.095510315 | -5.004798410 | -7.562672675 |
| C112 | -0.381096590 | -6.368565801 | -7.549112490 |
| C113 | 0.096612386  | -6.698308727 | -6.153238241 |
| C114 | -2.809929475 | -0.996766099 | -8.592284584 |
| C115 | -2.227044791 | 0.222494905  | -9.278830592 |
| C116 | -3.355513501 | -0.738339624 | -7.165881117 |
| C117 | -2.250812921 | -0.691322730 | -6.143253159 |
| C118 | -1.495791600 | 0.478288479  | -5.944119181 |
| C119 | -1.879400638 | -1.858609330 | -5.452496533 |
| C120 | -0.360700247 | 0.453667854  | -5.128245502 |
| C121 | -0.745419759 | -1.880062984 | -4.635807706 |
| C122 | 0.034108490  | -0.728319150 | -4.494822282 |
| C123 | 8.309762757  | -6.895610905 | -2.446973256 |
| C124 | 9.279734220  | -6.930311698 | -1.254800692 |
| C125 | 6.885991762  | -7.328434254 | -2.064087432 |
| C126 | 5.837431601  | -7.136139346 | -3.116623168 |
| C127 | 5.703480452  | -7.828442159 | -4.303655030 |

|       |               |               |              |
|-------|---------------|---------------|--------------|
| C128  | 3.973069989   | -6.470497433  | -4.041248846 |
| C129  | 10.130695700  | -8.066025853  | 0.720692898  |
| C130  | 11.571119598  | -7.985470573  | 0.264553487  |
| C131  | 0.318387080   | -6.905842305  | 0.807018976  |
| C132  | 1.732929063   | -6.635324913  | 1.238539852  |
| C133  | 2.809311823   | -7.069714494  | 0.162870891  |
| C134  | 2.658825056   | -8.588842171  | -0.140970730 |
| C135  | 3.777038020   | -9.112625185  | -1.057661636 |
| C136  | 3.799518707   | -10.607625767 | -1.195523640 |
| C137  | 4.205362757   | -6.881238085  | 0.831108560  |
| C138  | 3.959454237   | -1.057712550  | -1.506260966 |
| Fe139 | 4.327264300   | -2.457950489  | -2.858802926 |
| Fe140 | 2.497248416   | 0.319060263   | -0.617595881 |
| Fe141 | 5.291285778   | 0.095910247   | -0.685049834 |
| Fe142 | 4.309301495   | 0.107268371   | -3.037956820 |
| Fe143 | 4.215516857   | 2.413296350   | -1.686681896 |
| Fe144 | 4.976770853   | -2.380044645  | -0.382693426 |
| Fe145 | 2.453119565   | -2.546195559  | -1.000019482 |
| H146  | -6.434114620  | -7.025135860  | -0.017469556 |
| H147  | -6.314435500  | -6.240671980  | -1.444887782 |
| H148  | -9.935330490  | -4.281446037  | -0.268720510 |
| H149  | -8.660287618  | -5.841749609  | -1.543993602 |
| H150  | -8.874000875  | -6.821174815  | -0.096569644 |
| H151  | -8.328957920  | -2.183346356  | 0.723557504  |
| H152  | -9.910798551  | -4.772560310  | 2.616145784  |
| H153  | -10.094204843 | -2.325657793  | 0.920124907  |
| H154  | -9.820724629  | -5.192622115  | 4.902124258  |
| H155  | -7.390965401  | -5.363332799  | 3.121142492  |
| H156  | -9.552260091  | -3.458384403  | 5.194060072  |
| H157  | -3.337906479  | -2.154197575  | 2.898705436  |
| H158  | -5.799583022  | -3.580133892  | 2.422942984  |
| H159  | -5.222403316  | -6.134935450  | 3.488505667  |
| H160  | -5.816295638  | 0.828227457   | 5.610787720  |
| H161  | -6.661960334  | -1.600903768  | 4.241147205  |
| H162  | -5.381600880  | -5.835217340  | 5.237315475  |
| H163  | -4.763237213  | -1.547494251  | 2.022630703  |
| H164  | -6.312235192  | -2.584350948  | 6.773580022  |
| H165  | -7.305650574  | -0.108885148  | 5.896363788  |
| H166  | -1.028069438  | -3.393995927  | 4.305298259  |
| H167  | -0.595753935  | -2.643988490  | 2.749997506  |
| H168  | 0.669503228   | -2.972403531  | 3.949466952  |
| H169  | -1.642434255  | -0.967941748  | 4.274979080  |
| H170  | -6.107404122  | -3.364557004  | 8.928544953  |
| H171  | -2.332922084  | 2.267782236   | 4.449747846  |
| H172  | -3.315581743  | 0.838757940   | 8.571235628  |
| H173  | -3.119760910  | 4.267950501   | 8.243234615  |
| H174  | -0.001535610  | -0.183798541  | 2.623231059  |
| H175  | 1.343919331   | -0.475450299  | 3.723418455  |
| H176  | 7.978003938   | 1.995582339   | 6.227617181  |
| H177  | -3.187398282  | 3.824604199   | 4.532624133  |
| H178  | -3.626061077  | 4.961879656   | 6.685295172  |
| H179  | -1.437471480  | 3.757448142   | 4.845303219  |
| H180  | -1.905046759  | 4.960472525   | 7.141964087  |
| H181  | -3.615187420  | 2.460591209   | 6.597076425  |
| H182  | -0.580797477  | 2.697646524   | 6.978648797  |
| H183  | -2.259656000  | 0.497378632   | 6.038014162  |
| H184  | 0.152551312   | 0.800606912   | 4.090042928  |
| H185  | 1.493625453   | 4.478553046   | 0.295771535  |
| H186  | 0.525278353   | 5.308749714   | 1.548133338  |
| H187  | 2.558029682   | 5.802578375   | 2.186557819  |
| H188  | 2.477589497   | 5.486981995   | 4.819345969  |

|      |               |              |               |
|------|---------------|--------------|---------------|
| H189 | 4.593371276   | 4.396444146  | 2.197555277   |
| H190 | 6.200480174   | 2.529851495  | 2.474784889   |
| H191 | 5.000408987   | 2.106516849  | 6.599182327   |
| H192 | -2.259489538  | -1.938471092 | 6.566332379   |
| H193 | -2.036451194  | -5.053929009 | 7.404020290   |
| H194 | -1.798277050  | -4.236584959 | 8.964896477   |
| H195 | -3.867241567  | -3.585970769 | 6.934120998   |
| H196 | -5.621616250  | -1.745397343 | 9.486091823   |
| H197 | 3.377524487   | 3.960576628  | 6.315086945   |
| H198 | 0.673007247   | -1.678898907 | 6.140552921   |
| H199 | -3.301032249  | 2.183805468  | 11.013604930  |
| H200 | -3.560383926  | 0.429576874  | 10.818961038  |
| H201 | -0.830570755  | 0.350189023  | 10.813505288  |
| H202 | 9.943156056   | -6.746472129 | 6.770225102   |
| H203 | -1.184310742  | -6.161231230 | -3.475124350  |
| H204 | 0.446674041   | -8.613181570 | 1.695703966   |
| H205 | -1.083343395  | -7.151204933 | -7.870401560  |
| H206 | 0.469123166   | -6.358583653 | -8.246237809  |
| H207 | -2.056431536  | -5.099820517 | -7.033310309  |
| H208 | -1.518597367  | -0.011140314 | -10.108263972 |
| H209 | -1.831783926  | -5.304867946 | -9.562016397  |
| H210 | -2.999884039  | -2.186274218 | -2.577864711  |
| H211 | -3.809778893  | -4.713984952 | -1.046412097  |
| H212 | -0.902237780  | -1.977169916 | -8.494394004  |
| H213 | -3.678851199  | -1.272853895 | -9.224401717  |
| H214 | 0.461087922   | -3.474849142 | -9.248511176  |
| H215 | -1.006385940  | -5.718743882 | -1.779392049  |
| H216 | -0.506537375  | -4.251603563 | -7.016407525  |
| H217 | 0.426342515   | -4.958569293 | -9.963995616  |
| H218 | -6.339735951  | -3.512470694 | -3.318419160  |
| H219 | -3.332825575  | -2.078652419 | -0.844321606  |
| H220 | 1.886654806   | -6.087601879 | -6.691932012  |
| H221 | -2.192514887  | -4.064598238 | -0.819581333  |
| H222 | -3.984392609  | 3.172532150  | 2.087354657   |
| H223 | -2.503636764  | 1.093181820  | 0.855065555   |
| H224 | -8.444752607  | 1.377274483  | 2.318325021   |
| H225 | -7.211520907  | 0.352015004  | -0.200553129  |
| H226 | -6.855371812  | 4.502268195  | 0.549343307   |
| H227 | -8.563459441  | 9.404641583  | 1.496627154   |
| H228 | -7.642135762  | 6.049280701  | 3.219261907   |
| H229 | -9.022116341  | 5.991224628  | 0.806683925   |
| H230 | -6.227356602  | 7.289804613  | 0.777966169   |
| H231 | -10.001878058 | 9.760450724  | -2.470887300  |
| H232 | -3.130898188  | 4.626326295  | 0.263654617   |
| H233 | -4.509320630  | 4.224002529  | -0.760547393  |
| H234 | -9.572584322  | 10.960084830 | -0.258299687  |
| H235 | -7.992635247  | 5.982757792  | -0.626266903  |
| H236 | -5.677821779  | 1.976977019  | 0.171034436   |
| H237 | -7.231615574  | 0.097201930  | 2.252818948   |
| H238 | -9.717217322  | 1.945708842  | -2.039210961  |
| H239 | -1.417166546  | 1.530939605  | -3.220948404  |
| H240 | -10.055778054 | 0.232163874  | -1.729620801  |
| H241 | 9.534037373   | 2.927855539  | 4.679127352   |
| H242 | 8.076614677   | 3.176275362  | 3.979846228   |
| H243 | 2.272825996   | 5.920923639  | -1.635099443  |
| H244 | -0.413942077  | 5.979228078  | -0.486040454  |
| H245 | 2.220792803   | 8.347781635  | -0.605051962  |
| H246 | -2.919606136  | 3.559309221  | -2.616626919  |
| H247 | -4.191467242  | 4.057421296  | -4.213841770  |
| H248 | -3.952550422  | 5.422689136  | -3.443643869  |
| H249 | -4.474425065  | 1.211090065  | -4.886492564  |

|      |              |              |              |
|------|--------------|--------------|--------------|
| H250 | -6.200293092 | 1.138945045  | -5.348955986 |
| H251 | 0.854451878  | 11.981084621 | -3.524937636 |
| H252 | -0.481997388 | 13.160549878 | -3.632249072 |
| H253 | 0.397375650  | 9.748683257  | -4.052186649 |
| H254 | -1.246804198 | 9.164152178  | -4.206266979 |
| H255 | -1.431169197 | 8.377791228  | -7.570158931 |
| H256 | -1.023240036 | 3.972194851  | -6.645835376 |
| H257 | -6.488756368 | 8.817728190  | -2.780341456 |
| H258 | -2.543328254 | 8.901521446  | 0.253540637  |
| H259 | -3.262495454 | 7.404178794  | -4.721387992 |
| H260 | 2.216910677  | 4.497165099  | -3.990725981 |
| H261 | 3.514662467  | 6.507014266  | -3.523881188 |
| H262 | -0.283518356 | 4.200236625  | -4.073831940 |
| H263 | -7.883581337 | -0.344101523 | -2.471533436 |
| H264 | 4.914791775  | 9.097640276  | -4.782223130 |
| H265 | -5.625456519 | -1.069835585 | -3.898861439 |
| H266 | 2.188739408  | 5.221951478  | -5.602502366 |
| H267 | -2.675982699 | 7.206461663  | -1.533355107 |
| H268 | -6.264428986 | 3.239940931  | -4.057291206 |
| H269 | 4.371540103  | 9.850801299  | -3.268033838 |
| H270 | -0.791309643 | 6.809664023  | -7.923163575 |
| H271 | -3.208967030 | 8.484484083  | -6.061233209 |
| H272 | -4.718022909 | -3.697505099 | -3.678424745 |
| H273 | -5.608666774 | -3.018107449 | -1.200532971 |
| H274 | -6.293837146 | 10.595444109 | -1.065630695 |
| H275 | -5.111010056 | 1.477426166  | -2.499464011 |
| H276 | 0.888203796  | 7.162682617  | -4.753995648 |
| H277 | 0.078517134  | 5.330921033  | -6.883754485 |
| H278 | 0.664191293  | 3.309840836  | -5.254871634 |
| H279 | -2.251038407 | 5.364847877  | -4.961821879 |
| H280 | 1.131490900  | 9.741457250  | 1.682794280  |
| H281 | 0.256995961  | 10.242535495 | -1.503338241 |
| H282 | 0.531472938  | 13.151410059 | -1.405114495 |
| H283 | 2.660219426  | 10.053765904 | 0.833087430  |
| H284 | -1.878957526 | 11.080171276 | -0.237123383 |
| H285 | 5.887833514  | -4.016473792 | -7.974584846 |
| H286 | 5.721919852  | -5.394611738 | -6.868229669 |
| H287 | 8.286663713  | -5.844453388 | -2.769352203 |
| H288 | 6.433437094  | -6.193947329 | -9.004602630 |
| H289 | 4.858252433  | -6.625381558 | -8.873088194 |
| H290 | 6.020502169  | 4.758630638  | -0.262111576 |
| H291 | 6.094932928  | 7.701161617  | 0.692219671  |
| H292 | 5.992800021  | 7.438682442  | -3.574780327 |
| H293 | 4.595503746  | 5.770471873  | 0.137334791  |
| H294 | 7.384942887  | 8.069194705  | -0.244581141 |
| H295 | 6.063476274  | 2.358915162  | -5.834431488 |
| H296 | 6.835733603  | 6.433066915  | -1.847401852 |
| H297 | 4.039950259  | -6.104127517 | 6.503094864  |
| H298 | 6.105260995  | -7.543813108 | 4.754428245  |
| H299 | 4.623181226  | 0.559160490  | -6.346801974 |
| H300 | 4.111164444  | 0.405765247  | 3.591263728  |
| H301 | 1.904077626  | 0.553968629  | -8.570334168 |
| H302 | -0.455372991 | -2.795780592 | -4.115177020 |
| H303 | 1.413580615  | 1.220458746  | -7.016704008 |
| H304 | 3.297829526  | -3.755553817 | 5.418804784  |
| H305 | 3.063712079  | -0.678699645 | -6.076944942 |
| H306 | 3.311538079  | -4.535140708 | 3.830504599  |
| H307 | 3.820345074  | -6.675893404 | 4.834908903  |
| H308 | 5.735822380  | -5.103293394 | 4.130956622  |
| H309 | 5.698439700  | -4.415255494 | 5.764082834  |
| H310 | -4.061188304 | -1.548465119 | -6.930688535 |

|       |              |               |              |
|-------|--------------|---------------|--------------|
| H311  | 4.529979103  | -8.558774837  | 7.096673809  |
| H312  | 3.619159247  | -11.189016175 | 5.789319895  |
| H313  | 0.939094714  | -0.736518666  | -3.887807670 |
| H314  | 4.689808946  | -10.684648740 | 8.456293917  |
| H315  | 3.159659240  | -11.042864407 | 7.996183307  |
| H316  | 4.827623311  | -2.903713314  | 2.998180606  |
| H317  | 0.244797107  | 1.348988453   | -4.978947387 |
| H318  | -2.477322289 | -2.766079097  | -5.561866133 |
| H319  | 7.226301056  | -10.168998724 | 1.162047775  |
| H320  | 6.901573390  | -8.400535148  | -1.797031336 |
| H321  | 6.027230787  | -8.258080630  | 2.104610006  |
| H322  | 6.609585799  | -11.015388205 | 0.026324884  |
| H323  | 6.497365523  | 1.357576825   | -8.664119572 |
| H324  | 6.181236280  | -5.220145300  | 1.332899091  |
| H325  | 1.957492310  | -7.137225831  | 2.191577054  |
| H326  | 4.384576003  | -2.859248083  | -6.713147982 |
| H327  | 2.681202511  | -9.136889903  | 0.814221114  |
| H328  | 4.110716350  | -7.730874172  | -5.734787542 |
| H329  | 3.022282997  | -5.986110771  | -4.225988821 |
| H330  | 5.160038986  | -11.769273474 | 6.430583966  |
| H331  | 4.540083323  | -0.767576688  | 2.388722262  |
| H332  | 7.894668980  | -5.885033200  | 2.867543643  |
| H333  | 7.042406855  | -3.930783643  | 1.433330589  |
| H334  | 8.050547025  | -6.602385631  | 5.143325960  |
| H335  | 3.672370476  | -1.862139304  | 6.235999762  |
| H336  | 2.763946546  | -12.079772223 | -1.776902320 |
| H337  | 3.652040264  | -8.664577999  | -2.054789789 |
| H338  | 4.759743548  | -8.818413271  | -0.673735025 |
| H339  | 1.684450888  | -8.757948237  | -0.621583384 |
| H340  | 2.274145049  | -2.819807607  | -5.539654779 |
| H341  | -1.786574040 | 1.396429008   | -6.461470816 |
| H342  | -3.917688821 | 0.207304935   | -7.201022537 |
| H343  | 1.843946031  | -5.550471588  | 1.363171290  |
| H344  | 7.880425232  | -7.434175202  | 2.987935955  |
| H345  | 6.530056896  | -9.237298255  | 3.201086490  |
| H346  | 3.159501733  | -0.320681926  | 5.655912258  |
| H347  | 6.333594578  | -8.577642001  | -4.770307478 |
| H348  | 6.575989382  | -6.783886530  | -1.163915478 |
| H349  | 1.559391854  | -3.767233645  | -6.881337666 |
| H350  | 5.253058408  | 3.356930232   | -7.065919321 |
| H351  | 6.360752616  | 0.327031408   | 5.449931427  |
| H352  | 6.877450936  | 0.545530784   | 3.759274865  |
| H353  | 9.749985709  | -7.321211526  | -3.843549551 |
| H354  | 9.006065745  | -8.655320348  | -3.257934988 |
| H355  | 9.992053065  | -9.049872471  | 1.196552628  |
| H356  | 8.464385223  | -8.686039700  | -0.455104560 |
| H357  | 11.749589599 | -8.302575252  | -0.790774928 |
| H358  | 9.939015299  | -7.297373749  | 1.486122791  |
| H359  | 9.461453998  | -0.034581146  | 4.436599915  |
| H360  | -2.672116461 | 13.642732966  | 1.554032706  |
| H361  | 8.775094064  | -6.319846436  | 8.052447042  |
| H362  | 8.523243519  | -4.024499417  | 6.559328606  |
| H363  | -4.230877791 | 12.603966003  | -0.838400907 |
| H364  | -3.631905465 | 10.742491788  | 1.544584205  |
| H365  | -5.233670686 | 11.345150014  | 1.078996343  |
| H366  | 1.340945390  | -3.429765298  | -0.484167083 |
| H367  | -5.499251994 | 6.989518953   | -3.713032089 |
| H368  | 2.540899802  | -0.559613158  | 0.619208717  |
| H369  | 0.188192679  | -1.338593023  | 0.065651144  |
| H370  | -1.119411276 | 0.153828356   | -1.143384622 |
| Mo371 | 4.020582729  | -4.718441210  | -1.305603824 |

|      |              |               |              |
|------|--------------|---------------|--------------|
| N372 | -6.935300647 | -6.833290333  | -0.888645184 |
| N373 | -9.158278403 | -4.097063945  | 0.361283353  |
| N374 | -9.423114398 | -4.084937188  | 3.185462481  |
| N375 | -7.005550099 | -5.224996646  | 4.054522526  |
| N376 | -5.103652580 | -3.289189315  | 3.111504835  |
| N377 | -5.915576626 | -1.043375892  | 4.663505414  |
| N378 | -5.786851764 | -1.980955709  | 7.411391920  |
| N379 | -3.365497127 | -3.485516757  | 7.821549912  |
| N380 | -1.262323852 | -2.122320071  | 6.652658851  |
| N381 | -1.455737192 | 0.856948039   | 6.555544692  |
| N382 | -2.642691197 | 1.309943513   | 9.180438593  |
| N383 | 3.983914871  | -10.497318029 | 7.741137040  |
| N384 | 5.052797952  | -8.564940111  | 6.214109598  |
| N385 | 4.428342384  | -2.780662669  | 3.933999432  |
| N386 | 3.488482572  | -1.257664074  | 5.442265757  |
| N387 | 4.109925889  | -0.571497636  | 3.308775423  |
| N388 | 7.922508923  | -6.555022818  | 6.178206513  |
| N389 | -5.439870320 | -3.028946531  | -3.351082597 |
| N390 | -1.516519504 | -5.634970783  | -2.661206856 |
| N391 | -5.672595183 | -0.420806123  | -3.096536569 |
| N392 | -8.108207999 | 0.641338711   | -2.352797384 |
| N393 | -7.888883477 | 0.837001975   | 0.396567190  |
| N394 | -5.695512180 | 2.528551302   | 1.027897210  |
| N395 | -2.647238457 | 2.790865701   | -1.944524515 |
| N396 | -1.773833567 | 0.969925940   | -1.174416283 |
| N397 | -6.386073226 | 5.210908033   | 1.108961865  |
| N398 | -9.197788811 | 8.028558817   | -1.469990561 |
| N399 | -9.371121278 | 9.977518338   | -0.423318373 |
| N400 | 8.742257924  | 2.445436854   | 4.246888918  |
| N401 | 6.789905895  | 7.292873105   | 0.058799082  |
| N402 | 5.287729395  | 7.972399868   | -3.073230222 |
| N403 | 2.772534733  | 7.108320568   | -3.911276640 |
| N404 | -1.620004311 | 5.728592894   | -5.698005062 |
| N405 | -1.238046896 | 7.431538586   | -7.258401360 |
| N406 | -2.740664138 | 7.757777985   | -5.525855197 |
| N407 | 1.311860754  | 6.310517429   | -1.598857372 |
| N408 | 1.391986540  | 8.686588525   | -0.106257811 |
| N409 | 0.283235133  | 11.133117603  | -1.004927469 |
| N410 | -0.610531899 | 9.916940426   | -3.946281236 |
| N411 | -2.262314980 | 12.007837757  | -0.399904131 |
| N412 | 5.481896953  | -5.820743504  | -8.986254630 |
| N413 | 3.603963420  | -3.442872470  | -7.031008782 |
| N414 | 2.491251858  | -0.588790858  | -6.941145618 |
| N415 | 4.550161708  | 1.399268245   | -6.933802508 |
| N416 | -0.135360257 | -4.126138481  | -9.773610961 |
| N417 | -1.897117533 | -2.120998847  | -8.697504039 |
| N418 | 8.835863977  | -7.694145991  | -3.571650578 |
| N419 | 4.745624734  | -6.282223131  | -2.974905744 |
| N420 | 4.523682125  | -7.393721441  | -4.869496041 |
| N421 | 9.199859104  | -7.982671575  | -0.393161563 |
| N422 | 0.580062688  | 2.029254653   | 0.768183235  |
| N423 | 1.320535705  | 1.379116610   | 0.205137088  |
| O424 | -7.034231139 | -4.648919402  | 0.968271499  |
| O425 | -8.323109599 | -2.091708424  | 3.231625091  |
| O426 | -7.313683329 | -4.236067571  | 6.091346465  |
| O427 | -3.863268694 | -3.847299033  | 4.935452315  |
| O428 | -3.767279508 | -0.300844690  | 4.549997764  |
| O429 | -5.069973940 | 0.132173928   | 7.903559724  |
| O430 | -3.494891351 | -2.960324135  | 10.051241167 |
| O431 | 0.271443189  | -3.660530855  | 7.409514803  |
| O432 | 0.748913959  | 0.590747960   | 7.093565556  |

|                      |                           |              |               |              |
|----------------------|---------------------------|--------------|---------------|--------------|
|                      | O433                      | -0.936518582 | 2.784563985   | 9.429192287  |
|                      | O434                      | -1.411823080 | 1.257547952   | 12.547130917 |
|                      | O435                      | 5.838130233  | -10.057313473 | 4.628635178  |
|                      | O436                      | 6.479495730  | -6.820023931  | 7.947239883  |
|                      | O437                      | 10.488256594 | -4.211483463  | 7.075084159  |
|                      | O438                      | -5.456407732 | -0.422166086  | -0.814159135 |
|                      | O439                      | -3.199674326 | -4.705894183  | -3.878954866 |
|                      | O440                      | -7.377134794 | 2.781056632   | -2.696482635 |
|                      | O441                      | -5.502504744 | 2.977380346   | -4.637863776 |
|                      | O442                      | -9.960761491 | 1.822853954   | 0.545187925  |
|                      | O443                      | -6.315889873 | 2.528772742   | 3.224134342  |
|                      | O444                      | -4.582060154 | 5.640142065   | 2.447250400  |
|                      | O445                      | -7.208093111 | 8.036595769   | 3.071812065  |
|                      | O446                      | 9.159921781  | -0.272406044  | 6.442685386  |
|                      | O447                      | 3.016252883  | 5.338992271   | 4.020428691  |
|                      | O448                      | 4.265004333  | 8.360311712   | -1.073491885 |
|                      | O449                      | 2.165647323  | 9.260103094   | -4.446642570 |
|                      | O450                      | -0.595111207 | 6.738966982   | -2.797327247 |
|                      | O451                      | -0.458324203 | 8.009358667   | 1.064709854  |
|                      | O452                      | 2.446241806  | 6.083906080   | 1.255317599  |
|                      | O453                      | 1.207429364  | 12.256759606  | 0.760075600  |
|                      | O454                      | -1.936038825 | 14.006545849  | -1.448739188 |
|                      | O455                      | -2.373915757 | 11.352880109  | -3.742373449 |
|                      | O456                      | -4.626597830 | 14.143502676  | 1.233408552  |
|                      | O457                      | -4.633160609 | 6.935634636   | -3.264234009 |
|                      | O458                      | 2.992999422  | -5.521513705  | -7.799176397 |
|                      | O459                      | 1.060423740  | -1.726573207  | -8.322096815 |
|                      | O460                      | 3.220854880  | 2.778798134   | -8.184387654 |
|                      | O461                      | 7.858513354  | 2.591182324   | -7.774654336 |
|                      | O462                      | -3.570580675 | -3.594448886  | -9.179679727 |
|                      | O463                      | -0.639125856 | -7.123571274  | -5.267252840 |
|                      | O464                      | 1.396235362  | -6.458147206  | -5.893055298 |
|                      | O465                      | -2.525505459 | 1.376990618   | -9.009474266 |
|                      | O466                      | 10.174392868 | -6.073730352  | -1.124948573 |
|                      | O467                      | 12.495265059 | -7.668098936  | 0.999995267  |
|                      | O468                      | -0.387929918 | -6.149135930  | 0.156058381  |
|                      | O469                      | -0.213878941 | -8.115737830  | 1.176372700  |
|                      | O470                      | 4.732967205  | -11.342651067 | -0.880611412 |
|                      | O471                      | 2.652839366  | -11.106225098 | -1.728425091 |
|                      | O472                      | 5.010477668  | -6.074380767  | 0.221778841  |
|                      | O473                      | 4.499972017  | -7.532371185  | 1.861553317  |
|                      | O474                      | 2.687493743  | -6.310212565  | -0.980152955 |
|                      | O475                      | 8.327406546  | -6.628008927  | 3.360040611  |
|                      | O476                      | 6.782395434  | -4.720985969  | 1.944004378  |
|                      | O477                      | -3.482659663 | 4.635418301   | -3.814009197 |
|                      | O478                      | 7.463086856  | -10.842195995 | 0.474860512  |
|                      | O479                      | 6.838117254  | -8.779576581  | 2.376806806  |
|                      | S480                      | 4.316627823  | 4.714801875   | -2.016894373 |
|                      | S481                      | 2.522422295  | 1.465877424   | -2.815890100 |
|                      | S482                      | 2.489885335  | -3.752630101  | -2.858075611 |
|                      | S483                      | 4.132775868  | 1.569849759   | 0.435657455  |
|                      | S484                      | 0.701764369  | -1.100426527  | -1.173873604 |
|                      | S485                      | 4.754525880  | -1.279709899  | -4.722763139 |
|                      | S486                      | 3.404953699  | -3.539253330  | 0.700690506  |
|                      | S487                      | 6.080698222  | 1.336982760   | -2.379875458 |
|                      | S488                      | 6.043538095  | -3.598998947  | -1.904274330 |
|                      | S489                      | 6.321975525  | -1.098072384  | 0.839156450  |
| <b>2(a)</b>          | bm12cnx2b266x2n2x47.car_1 |              |               |              |
| Fe( 139) 0.558 2.443 | C1                        | -8.031518957 | -4.923699625  | 0.103121967  |
|                      | C2                        | -8.060899030 | -6.264440870  | -0.639255738 |

Fe( 140) 0.345 0.158  
 Fe( 141) 0.568 2.768  
 Fe( 142) 0.543 -2.578  
 Fe( 143) 0.614 3.188  
 Fe( 144) 0.512 -2.328  
 Fe( 145) 0.197 -0.151

S=2

|     |              |              |              |
|-----|--------------|--------------|--------------|
| C3  | -9.178984221 | -2.782546689 | 0.490343869  |
| C4  | -9.134298639 | -2.732372513 | 2.015509925  |
| C5  | -9.659757648 | -3.828958390 | 4.130901263  |
| C6  | -8.248272024 | -4.007734492 | 4.701959029  |
| C7  | -5.991747166 | -4.881513203 | 4.315514495  |
| C8  | -5.178035800 | -3.598605311 | 4.121549456  |
| C9  | -4.716839220 | -1.644219249 | 2.738261725  |
| C10 | -5.081883150 | -0.553928485 | 3.757008962  |
| C11 | -6.803800986 | 0.495834685  | 5.112169037  |
| C12 | -6.370568787 | 0.188651418  | 6.552360632  |
| C13 | -6.348151284 | -1.456173781 | 8.367651701  |
| C14 | -4.932799853 | -1.880014639 | 8.776028501  |
| C15 | -2.863376282 | -3.030194524 | 8.108228700  |
| C16 | -1.664034862 | -2.265101701 | 7.539426135  |
| C17 | -0.949625977 | -0.465518298 | 5.984564281  |
| C18 | -0.994177041 | 1.008624756  | 6.430401408  |
| C19 | -1.048585513 | -0.663341295 | 4.449091342  |
| C20 | -0.105578172 | 0.270320636  | 3.685085288  |
| C21 | -0.781640900 | -2.127650672 | 4.079493746  |
| C22 | -2.302748263 | 3.091747252  | 6.585407431  |
| C23 | -2.602985970 | 3.219596566  | 8.091611428  |
| C24 | -3.356474653 | 3.812521628  | 5.709058148  |
| C25 | -3.605796755 | 5.241948971  | 6.205912726  |
| C26 | -2.921350597 | 3.827591201  | 4.238190307  |
| C27 | -3.985309590 | 2.587941428  | 9.983520194  |
| C28 | -2.807890755 | 2.405291369  | 10.919682851 |
| C29 | 3.778631262  | -9.894527775 | 8.204254322  |
| C30 | 4.586535000  | -8.875412135 | 7.399315755  |
| C31 | 5.031629849  | -6.425582916 | 7.186982088  |
| C32 | 5.998482731  | -5.838097994 | 8.230873759  |
| C33 | 3.975225084  | -5.394432187 | 6.747613847  |
| C34 | 4.575945089  | -4.131757622 | 6.125640473  |
| C35 | 3.501554133  | -3.277267229 | 5.454919506  |
| C36 | 3.620089253  | -0.881968952 | 4.733574101  |
| C37 | 8.270298721  | -5.019524407 | 8.637134882  |
| C38 | 8.636847355  | -3.584348052 | 8.325884811  |
| C39 | -4.823465998 | -2.812458428 | -2.222397916 |
| C40 | -5.205251264 | -1.322738707 | -2.286195332 |
| C41 | -3.342625194 | -2.890033572 | -1.781832904 |
| C42 | -2.846495606 | -4.267376877 | -1.295853697 |
| C43 | -2.282075151 | -5.181620343 | -2.382160140 |
| C44 | -5.356362832 | 0.621687287  | -3.814584040 |
| C45 | -6.718530962 | 1.208995636  | -3.428168788 |
| C46 | -4.971426880 | 0.874706383  | -5.299316773 |
| C47 | -9.022715405 | 0.724348546  | -2.744989994 |
| C48 | -8.983376433 | 1.127391266  | -1.263351091 |
| C49 | -7.682672892 | 1.158313031  | 0.824631809  |
| C50 | -6.640018214 | 2.248054838  | 1.095804051  |
| C51 | -4.769485473 | 3.615187708  | 0.279256113  |
| C52 | -5.413118051 | 5.001650042  | 0.470868645  |
| C53 | -3.851611359 | 3.748220992  | -0.948063232 |
| C54 | -3.026507026 | 2.557251366  | -1.322674973 |
| C55 | -2.628504981 | 1.461100335  | -0.590015897 |
| C56 | -1.766985744 | 1.356656962  | -2.628341750 |
| C57 | -7.055198685 | 6.555524363  | -0.493903764 |
| C58 | -7.490972380 | 7.085904040  | 0.869785666  |
| C59 | -8.272917724 | 6.435833857  | -1.441652168 |
| C60 | -8.719051096 | 7.702498164  | -2.110796434 |
| C61 | -8.864835881 | 8.983958798  | -1.615056055 |
| C62 | -9.424053411 | 8.916523767  | -3.758474595 |
| C63 | 7.534047689  | 2.340336328  | 5.784906556  |



|      |              |              |              |
|------|--------------|--------------|--------------|
| C64  | 8.373011757  | 1.149859461  | 6.208461418  |
| C65  | 6.208790707  | 1.778550982  | 5.213788409  |
| C66  | 5.239777801  | 2.861084263  | 4.801242297  |
| C67  | 4.313192403  | 3.402469923  | 5.710040411  |
| C68  | 5.238956218  | 3.355690128  | 3.484441381  |
| C69  | 3.414200765  | 4.402021696  | 5.319353775  |
| C70  | 4.354850596  | 4.358415784  | 3.082742968  |
| C71  | 3.440335285  | 4.877116391  | 4.001334123  |
| C72  | 6.158638752  | 6.670471341  | -1.324267038 |
| C73  | 5.278035061  | 7.579463140  | -2.189574270 |
| C74  | 5.333673149  | 5.484730908  | -0.803585693 |
| C75  | 4.804991207  | 8.405606061  | -4.453542935 |
| C76  | 3.416817049  | 7.871296512  | -4.811309618 |
| C77  | 1.864217120  | 5.953876121  | -4.717883589 |
| C78  | 0.914105511  | 6.160878623  | -3.517753881 |
| C79  | 2.076868682  | 4.473518382  | -5.081432980 |
| C80  | 0.834496223  | 3.632317717  | -5.392518239 |
| C81  | 0.075954859  | 3.955992196  | -6.691086748 |
| C82  | -1.249530658 | 6.015252087  | -7.146333799 |
| C83  | 0.602017828  | 6.237851011  | -1.103886920 |
| C84  | 0.388707640  | 7.719796270  | -0.740172871 |
| C85  | 1.122328448  | 5.505817550  | 0.141030847  |
| C86  | 1.478512223  | 9.894602761  | -0.493575973 |
| C87  | 1.004883807  | 11.117579267 | -1.273721391 |
| C88  | -0.029716482 | 12.009541267 | -3.316079661 |
| C89  | -1.439697253 | 12.573351488 | -3.033921024 |
| C90  | 0.134364160  | 11.655320356 | -4.810301827 |
| C91  | -0.792547059 | 10.520910065 | -5.232644070 |
| C92  | -3.640210749 | 12.154473696 | -2.021395454 |
| C93  | -3.755820734 | 13.426736957 | -1.192026801 |
| C94  | -4.355640442 | 10.984191105 | -1.292967785 |
| C95  | -4.374758002 | 9.716778637  | -2.118513545 |
| C96  | -5.364535976 | 9.512799135  | -3.091246800 |
| C97  | -3.382803168 | 8.734446468  | -1.967788752 |
| C98  | -5.360341253 | 8.374783325  | -3.900127762 |
| C99  | -3.349964716 | 7.599445013  | -2.783078158 |
| C100 | -4.342026543 | 7.432051090  | -3.746659355 |
| C101 | 6.118181982  | -5.855146954 | -6.490533907 |
| C102 | 4.632266091  | -5.542447867 | -6.429003272 |
| C103 | 2.953079789  | -3.788885604 | -5.899755268 |
| C104 | 2.644059399  | -2.643320368 | -6.870786169 |
| C105 | 3.036600067  | -0.277965998 | -7.364815530 |
| C106 | 4.178755531  | 0.732067796  | -7.403552429 |
| C107 | 6.314296777  | 1.525371741  | -6.501536817 |
| C108 | 7.522579178  | 1.123126049  | -7.322434361 |
| C109 | -0.368661206 | -5.675018601 | -8.411868233 |
| C110 | -1.398974377 | -4.567121433 | -8.662647089 |
| C111 | -0.282015655 | -5.968661306 | -6.896338933 |
| C112 | 0.406258222  | -7.319280025 | -6.627575178 |
| C113 | 0.748728523  | -7.456844661 | -5.161627730 |
| C114 | -1.886834855 | -2.169237954 | -8.641145788 |
| C115 | -1.218166406 | -1.052575495 | -9.419510262 |
| C116 | -2.600067224 | -1.718123846 | -7.342868378 |
| C117 | -1.602286637 | -1.496213601 | -6.240413901 |
| C118 | -0.884136841 | -0.293682560 | -6.147588461 |
| C119 | -1.263512946 | -2.557204524 | -5.382021799 |
| C120 | 0.198958879  | -0.189630956 | -5.270611492 |
| C121 | -0.181650370 | -2.449317762 | -4.505188990 |
| C122 | 0.574939149  | -1.275137106 | -4.478382526 |
| C123 | 8.491800902  | -7.023279849 | -0.652628518 |
| C124 | 9.351237751  | -6.896386270 | 0.616524783  |

|       |               |               |              |
|-------|---------------|---------------|--------------|
| C125  | 7.040139426   | -7.427060463  | -0.351109361 |
| C126  | 6.092385789   | -7.374861270  | -1.510854778 |
| C127  | 6.081413209   | -8.190268663  | -2.623831501 |
| C128  | 4.309747929   | -6.861854044  | -2.668586147 |
| C129  | 10.003678937  | -7.738102625  | 2.802622715  |
| C130  | 11.481056814  | -7.653916741  | 2.489105160  |
| C131  | 0.216786454   | -6.699496773  | 1.813343204  |
| C132  | 1.586379720   | -6.360983393  | 2.331307832  |
| C133  | 2.744907923   | -6.925153960  | 1.414866489  |
| C134  | 2.611470746   | -8.468706170  | 1.275422809  |
| C135  | 3.814704986   | -9.089335615  | 0.545791677  |
| C136  | 3.872143456   | -10.587797650 | 0.615818170  |
| C137  | 4.085446754   | -6.661187863  | 2.165839235  |
| C138  | 4.095954948   | -1.164158394  | -0.944650348 |
| Fe139 | 4.528428640   | -2.719435342  | -2.051867621 |
| Fe140 | 2.501222017   | 0.104601010   | -0.566099150 |
| Fe141 | 5.331417911   | 0.151366280   | -0.112354944 |
| Fe142 | 4.545635836   | -0.187788801  | -2.561182339 |
| Fe143 | 4.346407346   | 2.270474754   | -1.558061549 |
| Fe144 | 5.070427296   | -2.301176979  | 0.427261540  |
| Fe145 | 2.536694708   | -2.500660165  | -0.219135517 |
| H146  | -6.392181000  | -7.049090401  | 0.231452865  |
| H147  | -6.125115985  | -6.457219295  | -1.265427935 |
| H148  | -9.811389957  | -4.387989592  | -0.770947620 |
| H149  | -8.446532998  | -6.104755664  | -1.658188037 |
| H150  | -8.810296235  | -6.892381131  | -0.126253604 |
| H151  | -8.341168137  | -2.165784097  | 0.134475153  |
| H152  | -10.128362867 | -4.526079183  | 2.148382552  |
| H153  | -10.114488825 | -2.313003803  | 0.156467080  |
| H154  | -10.283624090 | -4.669209223  | 4.463862314  |
| H155  | -7.663114175  | -4.995630782  | 2.998840171  |
| H156  | -10.062871474 | -2.905330699  | 4.567387090  |
| H157  | -3.628493425  | -1.777167814  | 2.796227426  |
| H158  | -6.020168817  | -3.292468277  | 2.258010316  |
| H159  | -5.551935147  | -5.684938426  | 3.708879447  |
| H160  | -6.388803249  | 1.476245552   | 4.847526924  |
| H161  | -7.078373704  | -1.102915711  | 3.698320234  |
| H162  | -5.906370131  | -5.158088028  | 5.373225370  |
| H163  | -4.966992165  | -1.302990263  | 1.723525037  |
| H164  | -6.995651272  | -1.776143971  | 6.358798538  |
| H165  | -7.900465662  | 0.559595708   | 5.081954442  |
| H166  | -1.501049645  | -2.806690469  | 4.559112627  |
| H167  | -0.855590673  | -2.264301784  | 2.989905280  |
| H168  | 0.236049342   | -2.427264286  | 4.376842862  |
| H169  | -2.082069988  | -0.414456060  | 4.158328253  |
| H170  | -7.023430940  | -2.292355467  | 8.602231263  |
| H171  | -2.783923423  | 2.815284316   | 3.832681665  |
| H172  | -4.205759433  | 1.890072113   | 7.978100238  |
| H173  | -3.974157768  | 5.267178984   | 7.241474928  |
| H174  | -0.280572492  | 0.176652431   | 2.605304690  |
| H175  | 0.947528239   | 0.011276109   | 3.862903910  |
| H176  | 7.293659015   | 2.919851312   | 6.697035778  |
| H177  | -3.680089843  | 4.335710153   | 3.624624977  |
| H178  | -4.354617204  | 5.732811611   | 5.566868444  |
| H179  | -1.970784794  | 4.374181193   | 4.123667450  |
| H180  | -2.680122745  | 5.837165834   | 6.163661919  |
| H181  | -4.304875912  | 3.250949801   | 5.790324490  |
| H182  | -1.328721284  | 3.585285135   | 6.451923029  |
| H183  | -2.891856482  | 1.256474441   | 5.629836226  |
| H184  | -0.254092093  | 1.327600087   | 3.951476041  |
| H185  | 1.388370157   | 4.470988260   | -0.135582206 |

|      |              |              |               |
|------|--------------|--------------|---------------|
| H186 | 0.294281762  | 5.475591180  | 0.866247913   |
| H187 | 2.279597577  | 6.016483293  | 1.644861561   |
| H188 | 1.927912810  | 6.069099738  | 4.250278968   |
| H189 | 4.341871765  | 4.697022487  | 2.046748036   |
| H190 | 5.909578146  | 2.917400440  | 2.742083802   |
| H191 | 4.284306907  | 3.039575638  | 6.740808011   |
| H192 | -2.940051757 | -1.103231824 | 6.458750774   |
| H193 | -2.794875603 | -4.058168580 | 7.722632078   |
| H194 | -2.737765121 | -3.069298915 | 9.198041659   |
| H195 | -4.578106360 | -2.693963900 | 6.896200484   |
| H196 | -6.617779662 | -0.607408269 | 9.009371387   |
| H197 | 2.687472154  | 4.801090215  | 6.031512625   |
| H198 | 0.020554706  | -0.840771559 | 6.335851070   |
| H199 | -4.462011427 | 3.558478777  | 10.197650948  |
| H200 | -4.710558263 | 1.791345840  | 10.213078925  |
| H201 | -1.978574419 | 1.773714299  | 10.524995782  |
| H202 | 9.177465433  | -5.642180137 | 8.613340749   |
| H203 | -0.808977438 | -6.568716693 | -2.717249082  |
| H204 | 0.240208950  | -8.232469800 | 2.983146835   |
| H205 | -0.276492972 | -8.136460634 | -6.902078083  |
| H206 | 1.316529648  | -7.406485917 | -7.238292794  |
| H207 | -1.288675773 | -5.985346682 | -6.451177131  |
| H208 | -0.396219101 | -1.391650384 | -10.093726953 |
| H209 | -0.815543045 | -6.558336602 | -8.893254516  |
| H210 | -2.712948980 | -2.534666489 | -2.613606742  |
| H211 | -3.670458598 | -4.817209379 | -0.808216638  |
| H212 | -0.011138069 | -3.102779261 | -8.172948677  |
| H213 | -2.672064381 | -2.538731480 | -9.332052141  |
| H214 | 1.430711779  | -4.663451162 | -8.618353351  |
| H215 | -0.792280750 | -5.866842684 | -1.102230059  |
| H216 | 0.262685600  | -5.147666611 | -6.406281269  |
| H217 | 1.483055042  | -6.239024326 | -9.094126257  |
| H218 | -5.955393037 | -3.910899637 | -3.553155894  |
| H219 | -3.212388425 | -2.178850176 | -0.952807633  |
| H220 | 2.576340895  | -6.872691701 | -5.600868765  |
| H221 | -2.084079302 | -4.119371988 | -0.518245321  |
| H222 | -4.185834550 | 3.410368338  | 1.188439446   |
| H223 | -2.818476800 | 1.159725576  | 0.434254569   |
| H224 | -8.639521003 | 1.534129170  | 1.208775719   |
| H225 | -7.124442612 | 0.227769300  | -1.009975932  |
| H226 | -6.845766559 | 4.459326350  | -0.894010516  |
| H227 | -8.675378127 | 9.417000342  | -0.638672260  |
| H228 | -7.854226562 | 6.290382099  | 1.564232734   |
| H229 | -9.105334270 | 5.957789032  | -0.895240011  |
| H230 | -6.309166492 | 7.245563619  | -0.920540688  |
| H231 | -9.760358344 | 9.266601282  | -4.730474280  |
| H232 | -3.183736342 | 4.602903926  | -0.748703277  |
| H233 | -4.465919524 | 4.033047650  | -1.817663324  |
| H234 | -9.507067122 | 10.737922186 | -2.657796609  |
| H235 | -7.996241042 | 5.740979245  | -2.250229672  |
| H236 | -5.783314303 | 2.039625484  | -0.775341089  |
| H237 | -7.411099553 | 0.284127641  | 1.434617861   |
| H238 | -9.438651207 | 1.584486838  | -3.286307081  |
| H239 | -1.196363604 | 0.975478694  | -3.470963054  |
| H240 | -9.730448250 | -0.109315006 | -2.855291023  |
| H241 | 8.990950590  | 3.663042203  | 5.214962985   |
| H242 | 7.630333066  | 3.761753666  | 4.313058350   |
| H243 | 2.399208673  | 5.629170612  | -2.150229790  |
| H244 | -0.396437958 | 5.837517091  | -1.333426293  |
| H245 | 2.237930303  | 8.196203405  | -1.490610763  |
| H246 | -2.832217506 | 3.444813258  | -3.938666193  |

|      |              |              |              |
|------|--------------|--------------|--------------|
| H247 | -4.339064226 | 2.767051458  | -5.306150255 |
| H248 | -3.602524572 | 4.743695485  | -4.455928897 |
| H249 | -3.952442968 | 0.466243795  | -5.430148012 |
| H250 | -5.650774470 | 0.291563057  | -5.941867514 |
| H251 | 1.190197719  | 11.405373797 | -4.991027309 |
| H252 | -0.125360608 | 12.547364136 | -5.394851083 |
| H253 | 0.785551683  | 9.120709510  | -5.225885929 |
| H254 | -0.831761920 | 8.488716355  | -5.451614008 |
| H255 | -0.681516629 | 7.255474968  | -8.669254855 |
| H256 | -0.328771495 | 3.030148739  | -7.128136005 |
| H257 | -6.150065813 | 8.220099775  | -4.639688263 |
| H258 | -2.614070092 | 8.834074218  | -1.196443600 |
| H259 | -2.808907047 | 6.619275946  | -5.942797379 |
| H260 | 2.609496591  | 3.978657233  | -4.253810100 |
| H261 | 3.853798721  | 6.056127504  | -3.940908704 |
| H262 | 0.135614993  | 3.629517209  | -4.541912867 |
| H263 | -7.564419119 | -0.658592997 | -3.489437763 |
| H264 | 5.377142734  | 8.505754085  | -5.385309109 |
| H265 | -5.058175053 | -1.508388262 | -4.268869217 |
| H266 | 2.754366850  | 4.449170286  | -5.951571757 |
| H267 | -2.538041018 | 6.875918051  | -2.690802932 |
| H268 | 4.653783403  | 9.411114812  | -4.036402183 |
| H269 | 0.009490818  | 5.678920352  | -8.735109125 |
| H270 | -2.601909904 | 7.522138822  | -7.398555942 |
| H271 | -4.311978396 | -4.187368419 | -3.660589263 |
| H272 | -5.438512019 | -3.236188902 | -1.405694128 |
| H273 | -6.162504203 | 10.248449244 | -3.218601679 |
| H274 | -4.634543667 | 1.161702618  | -3.182933558 |
| H275 | 1.386155168  | 6.486124268  | -5.550868210 |
| H276 | 0.770335551  | 4.376323792  | -7.429496507 |
| H277 | 1.197509769  | 2.600956218  | -5.485215007 |
| H278 | -1.765834488 | 4.586578383  | -5.791150894 |
| H279 | 0.901396659  | 9.884410733  | 0.443364736  |
| H280 | 0.336863942  | 9.939750965  | -2.816871672 |
| H281 | 0.654507279  | 12.840507529 | -3.088602873 |
| H282 | 2.532588775  | 10.071466933 | -0.237162525 |
| H283 | -1.893976363 | 10.910823390 | -1.942534547 |
| H284 | 6.685860518  | -4.941965613 | -6.720882131 |
| H285 | 6.402855732  | -6.158333028 | -5.461128580 |
| H286 | 8.492550727  | -6.020554719 | -1.103701320 |
| H287 | 7.318889036  | -7.250675589 | -7.369048813 |
| H288 | 5.728207554  | -7.646918676 | -7.369341551 |
| H289 | 6.001361138  | 4.806668410  | -0.261092249 |
| H290 | 5.970582594  | 7.853814994  | 0.325965481  |
| H291 | 6.311214612  | 7.000442834  | -3.870481793 |
| H292 | 4.557999560  | 5.853658860  | -0.118309109 |
| H293 | 7.331493417  | 8.155060349  | -0.525358831 |
| H294 | 6.615554379  | 1.680589770  | -5.453835014 |
| H295 | 6.991690578  | 6.283860968  | -1.934173967 |
| H296 | 3.348792119  | -5.132878728 | 7.616991196  |
| H297 | 5.592639443  | -6.762763156 | 6.307019089  |
| H298 | 5.236992590  | -0.186940190 | -5.859202198 |
| H299 | 3.720257887  | 0.915716405  | 3.751752413  |
| H300 | 2.846037680  | -0.593794413 | -8.399084136 |
| H301 | 0.076941824  | -3.276454162 | -3.839422714 |
| H302 | 2.140634606  | 0.277724765  | -7.041414314 |
| H303 | 2.772524158  | -2.909334007 | 6.188189156  |
| H304 | 3.679951440  | -1.414649353 | -5.620524085 |
| H305 | 2.942645208  | -3.888610909 | 4.725784866  |
| H306 | 3.328671154  | -5.898180408 | 6.010927541  |
| H307 | 5.318541079  | -4.405480707 | 5.361413768  |

|      |              |               |              |
|------|--------------|---------------|--------------|
| H308 | 5.094444586  | -3.526697745  | 6.886639991  |
| H309 | -3.317317488 | -2.503537233  | -7.064555516 |
| H310 | 3.769103758  | -7.481609732  | 8.576245962  |
| H311 | 2.988154850  | -10.256037106 | 7.529137551  |
| H312 | 1.439398774  | -1.178289275  | -3.823300364 |
| H313 | 3.787683355  | -9.423847791  | 10.210017760 |
| H314 | 2.309824428  | -9.848312241  | 9.644603118  |
| H315 | 4.611107334  | -2.406226763  | 3.885616529  |
| H316 | 0.766171214  | 0.737443497   | -5.189007639 |
| H317 | -1.848732208 | -3.479483435  | -5.406399506 |
| H318 | 7.079587488  | -9.802863406  | 3.216329429  |
| H319 | 7.035349765  | -8.458126284  | 0.046075039  |
| H320 | 5.788950482  | -7.807249332  | 3.770864379  |
| H321 | 6.581937970  | -10.786813483 | 2.134150939  |
| H322 | 7.349927878  | 0.283436369   | -8.039013398 |
| H323 | 6.036028715  | -4.887675648  | 2.624713446  |
| H324 | 1.727475903  | -6.730426634  | 3.357333063  |
| H325 | 5.053382062  | -3.650757877  | -5.762187215 |
| H326 | 2.529380925  | -8.906370987  | 2.282855561  |
| H327 | 4.629123683  | -8.289302866  | -4.196737424 |
| H328 | 3.375015784  | -6.424556303  | -2.998081299 |
| H329 | 4.452371620  | -10.748114361 | 8.390097683  |
| H330 | 4.411670106  | -0.416373716  | 2.879159964  |
| H331 | 7.573093020  | -5.312405154  | 4.407892823  |
| H332 | 6.789321618  | -3.529328220  | 2.666772120  |
| H333 | 7.476435846  | -5.729120876  | 6.765443868  |
| H334 | 2.999302099  | -0.881833257  | 6.689126382  |
| H335 | 2.895738217  | -12.154331696 | 0.204264284  |
| H336 | 3.788560373  | -8.784187879  | -0.510931245 |
| H337 | 4.757497957  | -8.728593739  | 0.972191346  |
| H338 | 1.689958579  | -8.695855773  | 0.720014150  |
| H339 | 2.833578880  | -3.459191133  | -4.856125831 |
| H340 | -1.162618083 | 0.547250695   | -6.787624408 |
| H341 | -3.164173237 | -0.803840630  | -7.579634872 |
| H342 | 1.696246617  | -5.268603432  | 2.315142176  |
| H343 | 7.537023021  | -6.834070352  | 4.727051466  |
| H344 | 6.185127348  | -8.623955813  | 5.031310105  |
| H345 | 2.596791522  | 0.539658859   | 5.811032834  |
| H346 | 6.763249758  | -8.967905141  | -2.946161364 |
| H347 | 6.648531282  | -6.781841666  | 0.444473449  |
| H348 | 2.260078599  | -4.607146655  | -6.105806619 |
| H349 | 5.953800971  | 2.489561406   | -6.896550367 |
| H350 | 5.754065523  | 1.140649267   | 5.987324923  |
| H351 | 6.447518935  | 1.141517966   | 4.346930348  |
| H352 | 10.060824631 | -7.598200246  | -1.841445064 |
| H353 | 9.258768175  | -8.860063397  | -1.176869856 |
| H354 | 9.846515806  | -8.664099153  | 3.378526501  |
| H355 | 8.465395446  | -8.540997060  | 1.564508151  |
| H356 | 11.786934726 | -8.133187763  | 1.528389786  |
| H357 | 9.706826233  | -6.891169676  | 3.442365671  |
| H358 | 8.926827435  | 0.657431675   | 5.372533150  |
| H359 | -2.858030409 | 13.673622831  | -0.576607505 |
| H360 | 7.872746161  | -5.034967210  | 9.667140661  |
| H361 | 7.835550136  | -2.981969510  | 7.834160117  |
| H362 | -4.142131670 | 12.336845969  | -2.985408502 |
| H363 | -3.858377550 | 10.804924446  | -0.326834856 |
| H364 | -5.381059064 | 11.315945137  | -1.076130719 |
| H365 | -5.095658800 | 6.246631240   | -5.095731802 |
| H366 | 2.370547573  | -1.072823121  | 0.682291367  |
| H367 | 0.075352516  | -1.270193315  | -0.156638267 |
| H368 | 1.352701944  | -3.169025808  | 0.443122373  |

|       |              |              |              |
|-------|--------------|--------------|--------------|
| H369  | -1.307889968 | -0.125190228 | -1.208546647 |
| Mo370 | 4.096788329  | -4.760244114 | -0.207322037 |
| N371  | -6.799686665 | -6.983818618 | -0.705036568 |
| N372  | -9.119916664 | -4.125117221 | -0.072932433 |
| N373  | -9.701234010 | -3.771086354 | 2.678899422  |
| N374  | -7.392459563 | -4.743037730 | 3.948753353  |
| N375  | -5.400904669 | -2.908797092 | 2.974042788  |
| N376  | -6.380290115 | -0.502616191 | 4.144086175  |
| N377  | -6.550499638 | -1.090658593 | 6.974262278  |
| N378  | -4.177863792 | -2.484323012 | 7.816135130  |
| N379  | -1.959704205 | -1.247113547 | 6.691561367  |
| N380  | -2.150158994 | 1.691039722  | 6.182461617  |
| N381  | -3.605976610 | 2.450780951  | 8.587499904  |
| N382  | 3.158372180  | -9.331797628 | 9.409456364  |
| N383  | 4.381159806  | -7.595214963 | 7.761085428  |
| N384  | 4.086929938  | -2.143408722 | 4.725586709  |
| N385  | 2.896677633  | -0.430752711 | 5.785465622  |
| N386  | 3.833730266  | -0.092397920 | 3.678529821  |
| N387  | 7.240387057  | -5.552759220 | 7.766402939  |
| N388  | -5.037166139 | -3.463490629 | -3.517994852 |
| N389  | -1.222389228 | -5.936318500 | -2.026379655 |
| N390  | -5.241237255 | -0.806610267 | -3.537474743 |
| N391  | -7.752503591 | 0.326441783  | -3.322564347 |
| N392  | -7.877933449 | 0.760419520  | -0.557330557 |
| N393  | -5.778885275 | 2.574908851  | 0.090839699  |
| N394  | -2.483806454 | 2.476234665  | -2.597572058 |
| N395  | -1.840809958 | 0.713385793  | -1.439062503 |
| N396  | -6.488897093 | 5.226535090  | -0.327566204 |
| N397  | -9.072635894 | 7.674466062  | -3.451152761 |
| N398  | -9.309972350 | 9.740982888  | -2.678879431 |
| N399  | 8.264996201  | 3.098501325  | 4.766913502  |
| N400  | 6.735752941  | 7.396039178  | -0.180285464 |
| N401  | 5.570367709  | 7.602669751  | -3.521330314 |
| N402  | 3.168350012  | 6.579309406  | -4.508611026 |
| N403  | -1.048756832 | 4.877051715  | -6.492157962 |
| N404  | -0.473389742 | 6.385224021  | -8.189815091 |
| N405  | -2.195507777 | 6.885715932  | -6.717704497 |
| N406  | 1.450904171  | 6.035876392  | -2.273552354 |
| N407  | 1.363349046  | 8.593056288  | -1.133559569 |
| N408  | 0.353971237  | 10.894251992 | -2.454736687 |
| N409  | -0.226806232 | 9.288036698  | -5.266558328 |
| N410  | -2.243829350 | 11.814784240 | -2.249882032 |
| N411  | 6.380813479  | -6.870829034 | -7.514312787 |
| N412  | 4.312412979  | -4.281119900 | -6.085579001 |
| N413  | 3.218552358  | -1.466721306 | -6.552382873 |
| N414  | 5.234478596  | 0.557102695  | -6.567492685 |
| N415  | 0.899333040  | -5.399596637 | -9.100068583 |
| N416  | -0.972670834 | -3.286523924 | -8.479158345 |
| N417  | 9.123351160  | -7.944530057 | -1.617914139 |
| N418  | 4.973882219  | -6.543262914 | -1.561583964 |
| N419  | 4.953471787  | -7.850653846 | -3.339561306 |
| N420  | 9.195751928  | -7.830052329 | 1.596880162  |
| N421  | 0.447153203  | 1.891551409  | 0.557838727  |
| N422  | 1.205169519  | 1.177064060  | 0.114821269  |
| O423  | -7.098859994 | -4.600953662 | 0.862829463  |
| O424  | -8.615552405 | -1.771165504 | 2.604491256  |
| O425  | -7.942091834 | -3.524028092 | 5.804418653  |
| O426  | -4.364603931 | -3.214499186 | 4.976910707  |
| O427  | -4.227451239 | 0.236107919  | 4.188155754  |
| O428  | -5.920716612 | 1.082873367  | 7.289522851  |
| O429  | -4.552730704 | -1.705879151 | 9.942405762  |

|             |                           |               |              |
|-------------|---------------------------|---------------|--------------|
| O430        | -0.515132724              | -2.614465739  | 7.847651941  |
| O431        | -0.020733710              | 1.529450601   | 6.996007364  |
| O432        | -1.964052230              | 3.998482627   | 8.819275471  |
| O433        | -2.785468325              | 2.852346993   | 12.057624326 |
| O434        | 5.334915004               | -9.269802082  | 6.479652132  |
| O435        | 5.629817224               | -5.652579247  | 9.404473694  |
| O436        | 9.720766488               | -3.094600210  | 8.602916436  |
| O437        | -5.436685690              | -0.653589306  | -1.256464724 |
| O438        | -2.787759693              | -5.243923817  | -3.524958654 |
| O439        | -6.845485572              | 2.415916025   | -3.176873743 |
| O440        | -5.065160597              | 2.220092369   | -5.710045163 |
| O441        | -9.946984752              | 1.736589371   | -0.776773883 |
| O442        | -6.605346454              | 2.793514770   | 2.206014112  |
| O443        | -4.924502766              | 5.868973859   | 1.203446389  |
| O444        | -7.505525893              | 8.264332294   | 1.184072578  |
| O445        | 8.442200693               | 0.728273501   | 7.354430752  |
| O446        | 2.572053516               | 5.853775714   | 3.550956319  |
| O447        | 4.353973422               | 8.263315564   | -1.711518124 |
| O448        | 2.609381237               | 8.628905548   | -5.388458791 |
| O449        | -0.278682727              | 6.447550187   | -3.714657588 |
| O450        | -0.604736015              | 8.064626355   | -0.086487831 |
| O451        | 2.247896510               | 6.202941051   | 0.684467538  |
| O452        | 1.190678959               | 12.251580292  | -0.814158584 |
| O453        | -1.786685495              | 13.668680708  | -3.498155354 |
| O454        | -1.998845079              | 10.717337953  | -5.452997040 |
| O455        | -4.765583825              | 14.111230738  | -1.159685707 |
| O456        | -4.268435442              | 6.305776787   | -4.579702600 |
| O457        | 3.785340051               | -6.444386505  | -6.657621848 |
| O458        | 1.934971950               | -2.814300535  | -7.886483987 |
| O459        | 4.083426520               | 1.693429076   | -8.185384066 |
| O460        | 8.610121685               | 1.668443471   | -7.227590658 |
| O461        | -2.567303410              | -4.837000886  | -8.988881614 |
| O462        | -0.063942378              | -7.785572187  | -4.302423636 |
| O463        | 2.013508967               | -7.148567366  | -4.810924853 |
| O464        | -1.558748448              | 0.120326409   | -9.378483143 |
| O465        | 10.229255818              | -6.018798893  | 0.712780866  |
| O466        | 12.309836657              | -7.178746563  | 3.252598939  |
| O467        | -0.408824406              | -6.069155610  | 0.974719749  |
| O468        | -0.362607426              | -7.835445049  | 2.325638789  |
| O469        | 4.809000564               | -11.246096339 | 1.063969534  |
| O470        | 2.761119700               | -11.187089673 | 0.112412041  |
| O471        | 4.949405038               | -5.941163719  | 1.528504960  |
| O472        | 4.288880643               | -7.184426755  | 3.286785771  |
| O473        | 2.719477474               | -6.302882856  | 0.187079865  |
| O474        | 7.942968012               | -5.981365141  | 5.037248291  |
| O475        | 6.562319149               | -4.300953329  | 3.223138670  |
| O476        | -3.143824633              | 3.936590888   | -4.777462472 |
| O477        | 7.382788300               | -10.556612158 | 2.649085741  |
| O478        | 6.574047958               | -8.268599408  | 4.191308559  |
| S479        | 4.502499316               | 4.532136457   | -2.149649571 |
| S480        | 2.746566594               | 1.174381150   | -2.684019585 |
| S481        | 2.667128733               | -4.006160152  | -1.910830002 |
| S482        | 3.882622325               | 1.709217487   | 0.645839191  |
| S483        | 0.860829556               | -1.410492677  | -1.257758251 |
| S484        | 5.162968858               | -1.807309558  | -3.988812036 |
| S485        | 3.461423615               | -3.335750966  | 1.586266612  |
| S486        | 6.269283659               | 1.103379851   | -1.966927869 |
| S487        | 6.159958434               | -3.752795217  | -0.868570008 |
| S488        | 6.297855321               | -0.916004729  | 1.596899699  |
| <b>2(b)</b> | bm12cnx2b266x2n2x35.car_3 |               |              |

Fe( 139) 0.558 -2.423  
 Fe( 140) 0.340 -0.015  
 Fe( 141) 0.543 -2.608  
 Fe( 142) 0.541 2.548  
 Fe( 143) 0.511 1.825  
 Fe( 144) 0.512 2.347  
 Fe( 145) 0.194 0.228

S=1

|     |              |              |              |
|-----|--------------|--------------|--------------|
| C1  | -8.039427552 | -4.921863423 | 0.108697197  |
| C2  | -8.071843027 | -6.263579819 | -0.631032865 |
| C3  | -9.173420802 | -2.773623687 | 0.487917281  |
| C4  | -9.135036458 | -2.724821791 | 2.013634180  |
| C5  | -9.668223246 | -3.825311564 | 4.125870146  |
| C6  | -8.258296567 | -4.007010332 | 4.699341036  |
| C7  | -6.002632345 | -4.884192955 | 4.319117042  |
| C8  | -5.185330869 | -3.601921085 | 4.133514562  |
| C9  | -4.719106575 | -1.639555045 | 2.762178255  |
| C10 | -5.086412457 | -0.557440118 | 3.789286158  |
| C11 | -6.817000882 | 0.497079766  | 5.127528839  |
| C12 | -6.388346325 | 0.184383892  | 6.567875070  |
| C13 | -6.361783646 | -1.468764650 | 8.375776813  |
| C14 | -4.943234554 | -1.883854819 | 8.782546357  |
| C15 | -2.871985525 | -3.031551587 | 8.117949455  |
| C16 | -1.670971128 | -2.266762532 | 7.550798194  |
| C17 | -0.952190514 | -0.470520549 | 5.990513914  |
| C18 | -1.002612617 | 1.004348459  | 6.435134099  |
| C19 | -1.044579878 | -0.668656354 | 4.455688518  |
| C20 | -0.093836194 | 0.264076852  | 3.699770315  |
| C21 | -0.781718123 | -2.134890505 | 4.087767069  |
| C22 | -2.315972976 | 3.084441810  | 6.584150917  |
| C23 | -2.621222778 | 3.210262513  | 8.089911343  |
| C24 | -3.369566275 | 3.802159487  | 5.704244495  |
| C25 | -3.624388335 | 5.231558801  | 6.199042597  |
| C26 | -2.931263135 | 3.817354257  | 4.234515324  |
| C27 | -4.013469104 | 2.579136134  | 9.974271855  |
| C28 | -2.839856123 | 2.412410055  | 10.919869911 |
| C29 | 3.784761198  | -9.890712368 | 8.203978208  |
| C30 | 4.594513801  | -8.872621368 | 7.402210750  |
| C31 | 5.043914091  | -6.426871619 | 7.190858364  |
| C32 | 6.011558317  | -5.837303531 | 8.231810775  |
| C33 | 3.991398446  | -5.393504429 | 6.747910153  |
| C34 | 4.598198324  | -4.131763490 | 6.130211119  |
| C35 | 3.527424020  | -3.273170554 | 5.459638632  |
| C36 | 3.647736200  | -0.885380741 | 4.719058594  |
| C37 | 8.276289006  | -5.003499923 | 8.635086919  |
| C38 | 8.647233350  | -3.573872089 | 8.305082167  |
| C39 | -4.826171834 | -2.831097673 | -2.237757813 |
| C40 | -5.205583301 | -1.341792117 | -2.295874969 |
| C41 | -3.349727103 | -2.903374152 | -1.780912710 |
| C42 | -2.841174497 | -4.276081836 | -1.294289157 |
| C43 | -2.279687982 | -5.192096629 | -2.380935541 |
| C44 | -5.287567181 | 0.628062002  | -3.795776575 |
| C45 | -6.613529026 | 1.231395045  | -3.329961403 |
| C46 | -5.000274278 | 0.899366716  | -5.299289466 |
| C47 | -8.960358055 | 0.797427191  | -2.765277914 |
| C48 | -8.944988250 | 1.172302846  | -1.276299900 |
| C49 | -7.683675099 | 1.159871366  | 0.834736692  |
| C50 | -6.621109970 | 2.229178548  | 1.112420416  |
| C51 | -4.785685224 | 3.624436642  | 0.267412514  |
| C52 | -5.430374074 | 5.008654518  | 0.457206836  |
| C53 | -3.872866242 | 3.748730767  | -0.965358824 |
| C54 | -3.043855726 | 2.555223252  | -1.321825746 |
| C55 | -2.677558693 | 1.456809790  | -0.578213818 |
| C56 | -1.779021736 | 1.329037116  | -2.599221118 |
| C57 | -7.061557392 | 6.565382241  | -0.509349376 |
| C58 | -7.484809311 | 7.083612845  | 0.863518919  |
| C59 | -8.292694723 | 6.454650756  | -1.442096867 |
| C60 | -8.736416933 | 7.726279724  | -2.103794250 |
| C61 | -8.878047115 | 9.004480120  | -1.598689796 |



|      |              |              |              |
|------|--------------|--------------|--------------|
| C62  | -9.439588655 | 8.954700062  | -3.741630601 |
| C63  | 7.546520616  | 2.330800682  | 5.781260383  |
| C64  | 8.388355969  | 1.141437593  | 6.202314611  |
| C65  | 6.223360849  | 1.766804581  | 5.206806901  |
| C66  | 5.251147565  | 2.847750012  | 4.796206230  |
| C67  | 4.327750138  | 3.388966218  | 5.708519123  |
| C68  | 5.246490932  | 3.343834955  | 3.479863658  |
| C69  | 3.424833543  | 4.385783736  | 5.320774435  |
| C70  | 4.357902461  | 4.343755770  | 3.081119120  |
| C71  | 3.444459297  | 4.859958482  | 4.002361294  |
| C72  | 6.154166605  | 6.617351178  | -1.333768608 |
| C73  | 5.271399766  | 7.528160061  | -2.194374639 |
| C74  | 5.340145536  | 5.428055140  | -0.799403161 |
| C75  | 4.803483583  | 8.381871356  | -4.449085911 |
| C76  | 3.410426015  | 7.856345868  | -4.801429942 |
| C77  | 1.853813064  | 5.939008147  | -4.708262515 |
| C78  | 0.903129530  | 6.149135739  | -3.508605649 |
| C79  | 2.063801151  | 4.458167297  | -5.068644026 |
| C80  | 0.816970021  | 3.623169058  | -5.375970046 |
| C81  | 0.058244717  | 3.942929440  | -6.675248467 |
| C82  | -1.255116525 | 6.013063512  | -7.123615313 |
| C83  | 0.584614564  | 6.231305159  | -1.097152204 |
| C84  | 0.380204432  | 7.715125027  | -0.739897304 |
| C85  | 1.098188405  | 5.497504752  | 0.149108233  |
| C86  | 1.480289433  | 9.884512496  | -0.500150892 |
| C87  | 1.013135074  | 11.109999634 | -1.281506051 |
| C88  | -0.031145113 | 12.006270491 | -3.318411375 |
| C89  | -1.440542153 | 12.571487224 | -3.037354083 |
| C90  | 0.129278064  | 11.652316185 | -4.813578326 |
| C91  | -0.798225620 | 10.516852348 | -5.231891312 |
| C92  | -3.647491527 | 12.159000081 | -2.038238411 |
| C93  | -3.764948035 | 13.431310939 | -1.208381758 |
| C94  | -4.372715237 | 10.988775158 | -1.318028014 |
| C95  | -4.388374119 | 9.719347839  | -2.140798344 |
| C96  | -5.373235201 | 9.517519887  | -3.119728799 |
| C97  | -3.402825036 | 8.731754382  | -1.978775090 |
| C98  | -5.372045438 | 8.374762830  | -3.922192750 |
| C99  | -3.372561070 | 7.592316063  | -2.788088980 |
| C100 | -4.361358008 | 7.425900790  | -3.755685555 |
| C101 | 6.119050513  | -5.861381725 | -6.477425978 |
| C102 | 4.634209357  | -5.544635931 | -6.422078728 |
| C103 | 2.958788890  | -3.789024979 | -5.898173689 |
| C104 | 2.653070918  | -2.654787637 | -6.883869109 |
| C105 | 3.058240469  | -0.297469972 | -7.408572260 |
| C106 | 4.198553456  | 0.716806118  | -7.438190237 |
| C107 | 6.313473121  | 1.528256315  | -6.498964369 |
| C108 | 7.529856325  | 1.113241641  | -7.302161902 |
| C109 | -0.369509830 | -5.678267270 | -8.411990587 |
| C110 | -1.398585043 | -4.569660228 | -8.667538078 |
| C111 | -0.279158426 | -5.967998674 | -6.897148583 |
| C112 | 0.398797011  | -7.323818529 | -6.625982289 |
| C113 | 0.743215032  | -7.456444967 | -5.160109629 |
| C114 | -1.878604544 | -2.169007058 | -8.654054068 |
| C115 | -1.202590142 | -1.056493071 | -9.432042818 |
| C116 | -2.587997386 | -1.708086708 | -7.356959683 |
| C117 | -1.585123955 | -1.484761516 | -6.258911016 |
| C118 | -0.869471694 | -0.281019959 | -6.166315872 |
| C119 | -1.236614392 | -2.547832720 | -5.406674056 |
| C120 | 0.221253583  | -0.177699926 | -5.298267159 |
| C121 | -0.145992628 | -2.441310322 | -4.540381829 |
| C122 | 0.607870795  | -1.264934786 | -4.513931439 |

|       |               |               |              |
|-------|---------------|---------------|--------------|
| C123  | 8.491638853   | -7.030300800  | -0.663821767 |
| C124  | 9.356740949   | -6.900232072  | 0.600532902  |
| C125  | 7.039154746   | -7.424890343  | -0.357805786 |
| C126  | 6.094040552   | -7.365094603  | -1.518377679 |
| C127  | 6.082792532   | -8.178218723  | -2.633204638 |
| C128  | 4.308735384   | -6.852282975  | -2.669454600 |
| C129  | 10.008851774  | -7.726491274  | 2.791917428  |
| C130  | 11.485502314  | -7.646872351  | 2.474315344  |
| C131  | 0.217240831   | -6.686624138  | 1.827173927  |
| C132  | 1.590961978   | -6.344937792  | 2.334768493  |
| C133  | 2.750202022   | -6.903015304  | 1.410541452  |
| C134  | 2.614412682   | -8.449021405  | 1.282619465  |
| C135  | 3.814419287   | -9.084612503  | 0.559931862  |
| C136  | 3.863881768   | -10.584342960 | 0.629681858  |
| C137  | 4.091319102   | -6.640498148  | 2.165899890  |
| C138  | 4.086669775   | -1.159416872  | -0.944564316 |
| Fe139 | 4.570150319   | -2.694956262  | -2.049128269 |
| Fe140 | 2.473386777   | 0.124614199   | -0.585960984 |
| Fe141 | 5.330879652   | 0.170656926   | -0.084949034 |
| Fe142 | 4.493234631   | -0.147237525  | -2.527599689 |
| Fe143 | 4.544119944   | 2.285800361   | -1.440308162 |
| Fe144 | 5.059613582   | -2.279053896  | 0.435557672  |
| Fe145 | 2.534723719   | -2.482297229  | -0.250214187 |
| H146  | -6.397700937  | -7.041946700  | 0.233955629  |
| H147  | -6.138375867  | -6.453123360  | -1.265911652 |
| H148  | -9.806915123  | -4.371577232  | -0.781932582 |
| H149  | -8.462303771  | -6.105907038  | -1.648510421 |
| H150  | -8.817905389  | -6.892956099  | -0.113488770 |
| H151  | -8.331026350  | -2.160987480  | 0.135477336  |
| H152  | -10.137591200 | -4.514395262  | 2.140465120  |
| H153  | -10.104638352 | -2.298039440  | 0.150982176  |
| H154  | -10.293562227 | -4.666176002  | 4.454653533  |
| H155  | -7.668563557  | -4.992158299  | 2.996023386  |
| H156  | -10.071578954 | -2.902925072  | 4.564606477  |
| H157  | -3.631026021  | -1.774279209  | 2.821289480  |
| H158  | -6.025532266  | -3.284056040  | 2.272297678  |
| H159  | -5.560884034  | -5.685548117  | 3.711084938  |
| H160  | -6.402887962  | 1.479161665   | 4.868128246  |
| H161  | -7.086111082  | -1.088720569  | 3.699047116  |
| H162  | -5.920979389  | -5.164492915  | 5.376092855  |
| H163  | -4.967156651  | -1.291585796  | 1.749127023  |
| H164  | -7.012124836  | -1.780323465  | 6.365768438  |
| H165  | -7.913554318  | 0.559622512   | 5.093721983  |
| H166  | -1.508099181  | -2.809022801  | 4.564265221  |
| H167  | -0.850911364  | -2.273234321  | 2.997492475  |
| H168  | 0.232591025   | -2.440028226  | 4.391906344  |
| H169  | -2.075433397  | -0.416519326  | 4.158651416  |
| H170  | -7.031742116  | -2.310657213  | 8.605207891  |
| H171  | -2.791573489  | 2.805430908   | 3.830252184  |
| H172  | -4.222710591  | 1.880252913   | 7.970223382  |
| H173  | -3.987310823  | 5.258638964   | 7.236874230  |
| H174  | -0.250884972  | 0.168276753   | 2.6171115706 |
| H175  | 0.957167794   | 0.008530766   | 3.895006722  |
| H176  | 7.302578869   | 2.907281878   | 6.694255821  |
| H177  | -3.689756003  | 4.323634376   | 3.619694182  |
| H178  | -4.378877875  | 5.716627697   | 5.561994049  |
| H179  | -1.981827353  | 4.365642401   | 4.122802342  |
| H180  | -2.702505236  | 5.832425033   | 6.149824137  |
| H181  | -4.316613857  | 3.238224183   | 5.784187363  |
| H182  | -1.342620247  | 3.581035056   | 6.453208642  |
| H183  | -2.899769936  | 1.244670119   | 5.630750292  |

|      |              |              |               |
|------|--------------|--------------|---------------|
| H184 | -0.250307934 | 1.321622938  | 3.961071524   |
| H185 | 1.348436150  | 4.458556941  | -0.126141757  |
| H186 | 0.273448783  | 5.479396059  | 0.878757895   |
| H187 | 2.272419914  | 5.993210748  | 1.644591571   |
| H188 | 1.931292904  | 6.050981611  | 4.254794908   |
| H189 | 4.344258338  | 4.686998609  | 2.046839200   |
| H190 | 5.919513753  | 2.910115394  | 2.736689381   |
| H191 | 4.304518638  | 3.027123349  | 6.739834572   |
| H192 | -2.943528245 | -1.112818608 | 6.456543849   |
| H193 | -2.801907013 | -4.059476568 | 7.732849526   |
| H194 | -2.747229841 | -3.069561436 | 9.207920562   |
| H195 | -4.587185309 | -2.700724576 | 6.904991056   |
| H196 | -6.637703052 | -0.625201539 | 9.021893934   |
| H197 | 2.700177224  | 4.783373108  | 6.035492672   |
| H198 | 0.017581362  | -0.842313880 | 6.346315528   |
| H199 | -4.500524532 | 3.546928822  | 10.180118193  |
| H200 | -4.733242415 | 1.776692630  | 10.203139935  |
| H201 | -2.004957973 | 1.781779493  | 10.534781539  |
| H202 | 9.181913600  | -5.629055188 | 8.630125251   |
| H203 | -0.806053720 | -6.577330446 | -2.718675514  |
| H204 | 0.239191877  | -8.204641770 | 3.018755811   |
| H205 | -0.292262054 | -8.136582929 | -6.892822239  |
| H206 | 1.306839039  | -7.423002872 | -7.238734353  |
| H207 | -1.284167563 | -5.977053906 | -6.448107260  |
| H208 | -0.368313847 | -1.397324221 | -10.089703540 |
| H209 | -0.820624359 | -6.562417531 | -8.889966175  |
| H210 | -2.714659672 | -2.538912394 | -2.604468424  |
| H211 | -3.656278516 | -4.830389899 | -0.796964017  |
| H212 | -0.007808527 | -3.108985099 | -8.182309432  |
| H213 | -2.667075579 | -2.535057494 | -9.344072721  |
| H214 | 1.432535410  | -4.674737753 | -8.629933685  |
| H215 | -0.780375283 | -5.867209553 | -1.106701065  |
| H216 | 0.274346013  | -5.150540313 | -6.411711475  |
| H217 | 1.477269015  | -6.252539225 | -9.095701235  |
| H218 | -5.949083367 | -3.896860839 | -3.601142039  |
| H219 | -3.235204589 | -2.194955708 | -0.947201222  |
| H220 | 2.569729114  | -6.873173712 | -5.602678128  |
| H221 | -2.072242018 | -4.119459807 | -0.524524569  |
| H222 | -4.199702546 | 3.422081764  | 1.175140097   |
| H223 | -2.894532071 | 1.161577526  | 0.442193108   |
| H224 | -8.638921125 | 1.552028241  | 1.206895451   |
| H225 | -7.112866147 | 0.224179808  | -0.991916357  |
| H226 | -6.835889088 | 4.481302491  | -0.946056586  |
| H227 | -8.684814797 | 9.428973842  | -0.619265702  |
| H228 | -7.840142349 | 6.280022009  | 1.552798435   |
| H229 | -9.121496651 | 5.983045634  | -0.884923429  |
| H230 | -6.322745559 | 7.261077463  | -0.939309974  |
| H231 | -9.775026069 | 9.314169579  | -4.710495331  |
| H232 | -3.210720905 | 4.611678053  | -0.781662469  |
| H233 | -4.492376889 | 4.013122099  | -1.838138488  |
| H234 | -9.516244617 | 10.767561071 | -2.626605516  |
| H235 | -8.035699996 | 5.756878648  | -2.254831624  |
| H236 | -5.910281424 | 2.158920035  | -0.830256131  |
| H237 | -7.431976205 | 0.282875557  | 1.448367227   |
| H238 | -9.358894550 | 1.671874525  | -3.297295363  |
| H239 | -1.199979847 | 0.934102715  | -3.429299478  |
| H240 | -9.672215696 | -0.027629420 | -2.906720874  |
| H241 | 9.004887413  | 3.652586906  | 5.211578541   |
| H242 | 7.641365046  | 3.758663950  | 4.315024519   |
| H243 | 2.378503636  | 5.598917630  | -2.135074798  |
| H244 | -0.415519442 | 5.836029401  | -1.327160012  |

|      |              |              |              |
|------|--------------|--------------|--------------|
| H245 | 2.231115290  | 8.178553496  | -1.492533389 |
| H246 | -2.843444158 | 3.425479525  | -3.946555852 |
| H247 | -4.402578910 | 2.801290397  | -5.295438828 |
| H248 | -3.617761143 | 4.728189830  | -4.446047926 |
| H249 | -3.984944922 | 0.510886813  | -5.506657306 |
| H250 | -5.714304056 | 0.317593137  | -5.905829133 |
| H251 | 1.184819502  | 11.403036196 | -4.997799981 |
| H252 | -0.133307226 | 12.544063718 | -5.397340339 |
| H253 | 0.776254249  | 9.112846063  | -5.209005796 |
| H254 | -0.842216101 | 8.482461908  | -5.430681054 |
| H255 | -0.665729388 | 7.274300132  | -8.621805722 |
| H256 | -0.351879686 | 3.016514753  | -7.105607417 |
| H257 | -6.157654260 | 8.220142782  | -4.666754260 |
| H258 | -2.639232533 | 8.828422641  | -1.202180804 |
| H259 | -2.828100520 | 6.602759208  | -5.932421664 |
| H260 | 2.593551545  | 3.962881095  | -4.239472576 |
| H261 | 3.848223022  | 6.032834399  | -3.950863877 |
| H262 | 0.118365012  | 3.630053636  | -4.525323137 |
| H263 | -7.535031892 | -0.576187871 | -3.586287431 |
| H264 | 5.369877853  | 8.487579038  | -5.384572354 |
| H265 | -4.985501547 | -1.493180716 | -4.277761550 |
| H266 | 2.741043409  | 4.429380425  | -5.938951227 |
| H267 | -2.566325652 | 6.863224390  | -2.687215030 |
| H268 | 4.657014885  | 9.385558875  | -4.024493260 |
| H269 | 0.035022830  | 5.701926486  | -8.696255255 |
| H270 | -2.606846181 | 7.520150597  | -7.376253020 |
| H271 | -4.307991985 | -4.212059667 | -3.668575172 |
| H272 | -5.450392149 | -3.262134940 | -1.431163080 |
| H273 | -6.166334183 | 10.257305948 | -3.256080757 |
| H274 | -4.521158343 | 1.146762999  | -3.201692591 |
| H275 | 1.373865827  | 6.467987164  | -5.541960123 |
| H276 | 0.752707428  | 4.354305016  | -7.418368342 |
| H277 | 1.172726792  | 2.589129418  | -5.461324853 |
| H278 | -1.787510448 | 4.573977521  | -5.784118248 |
| H279 | 0.900285280  | 9.879157652  | 0.435044751  |
| H280 | 0.330404895  | 9.935823115  | -2.820649327 |
| H281 | 0.653994101  | 12.836565099 | -3.091959070 |
| H282 | 2.533963747  | 10.058383212 | -0.240444195 |
| H283 | -1.904254145 | 10.911948576 | -1.942221981 |
| H284 | 6.685968233  | -4.950019161 | -6.715974538 |
| H285 | 6.403667223  | -6.156287977 | -5.445860374 |
| H286 | 8.494329113  | -6.030193601 | -1.120576097 |
| H287 | 7.313942337  | -7.271478345 | -7.344203558 |
| H288 | 5.719289911  | -7.653912689 | -7.353164734 |
| H289 | 6.023713451  | 4.752044281  | -0.268475206 |
| H290 | 5.980252366  | 7.792547022  | 0.328701149  |
| H291 | 6.315280489  | 6.976254911  | -3.881469023 |
| H292 | 4.580256519  | 5.804201261  | -0.099369547 |
| H293 | 7.322590143  | 8.112759959  | -0.545728941 |
| H294 | 6.599294175  | 1.695867576  | -5.448737464 |
| H295 | 6.982862309  | 6.233014023  | -1.949705196 |
| H296 | 3.361304071  | -5.131447175 | 7.614611642  |
| H297 | 5.604411478  | -6.767719959 | 6.311984848  |
| H298 | 5.220863983  | -0.171815211 | -5.850166783 |
| H299 | 3.764590332  | 0.906918220  | 3.742697700  |
| H300 | 2.886126947  | -0.621875775 | -8.443694845 |
| H301 | 0.123083266  | -3.272123541 | -3.883812673 |
| H302 | 2.154700583  | 0.255275004  | -7.104096563 |
| H303 | 2.807907797  | -2.894849578 | 6.196482817  |
| H304 | 3.686969732  | -1.413840041 | -5.645842301 |
| H305 | 2.959696589  | -3.884351992 | 4.737309512  |

|      |              |               |              |
|------|--------------|---------------|--------------|
| H306 | 3.347031068  | -5.895067513  | 6.007682071  |
| H307 | 5.342668230  | -4.407334084  | 5.368785457  |
| H308 | 5.117073837  | -3.530836534  | 6.894524010  |
| H309 | -3.309219671 | -2.487598649  | -7.071666329 |
| H310 | 3.776737927  | -7.478669388  | 8.580314878  |
| H311 | 2.994485315  | -10.250862640 | 7.528049598  |
| H312 | 1.480361717  | -1.174567461  | -3.868266772 |
| H313 | 3.791730564  | -9.418877762  | 10.209411553 |
| H314 | 2.313302607  | -9.841194109  | 9.643212213  |
| H315 | 4.649912152  | -2.413693086  | 3.891018744  |
| H316 | 0.783752772  | 0.751511015   | -5.219092015 |
| H317 | -1.820396098 | -3.471289337  | -5.430563772 |
| H318 | 7.080602028  | -9.796899619  | 3.215962949  |
| H319 | 7.027338784  | -8.456232849  | 0.038895162  |
| H320 | 5.795152137  | -7.796523721  | 3.770760801  |
| H321 | 6.581292137  | -10.784522506 | 2.136769546  |
| H322 | 7.358622614  | 0.269252407   | -8.014004250 |
| H323 | 6.022244358  | -4.875262360  | 2.629718408  |
| H324 | 1.740635873  | -6.718014935  | 3.358841743  |
| H325 | 5.062636721  | -3.655885471  | -5.751884499 |
| H326 | 2.535935722  | -8.871096712  | 2.297098332  |
| H327 | 4.623279612  | -8.280306117  | -4.199632073 |
| H328 | 3.370584576  | -6.418264323  | -2.993814264 |
| H329 | 4.456168102  | -10.746084154 | 8.392242057  |
| H330 | 4.470690832  | -0.428268614  | 2.877872897  |
| H331 | 7.578849457  | -5.300456091  | 4.401298432  |
| H332 | 6.828364938  | -3.547021391  | 2.648764269  |
| H333 | 7.486305977  | -5.720114462  | 6.762419638  |
| H334 | 3.020067826  | -0.858865907  | 6.673300924  |
| H335 | 2.883124916  | -12.147583937 | 0.217289800  |
| H336 | 3.797591258  | -8.784164206  | -0.498878882 |
| H337 | 4.758295039  | -8.731198993  | 0.990824415  |
| H338 | 1.689347072  | -8.681312340  | 0.734687860  |
| H339 | 2.834202019  | -3.450048425  | -4.858049174 |
| H340 | -1.154240757 | 0.561203949   | -6.801848590 |
| H341 | -3.147433572 | -0.791855191  | -7.597757490 |
| H342 | 1.693228160  | -5.251452732  | 2.323940173  |
| H343 | 7.550301138  | -6.822347576  | 4.722360023  |
| H344 | 6.190974929  | -8.610973759  | 5.033274183  |
| H345 | 2.625267200  | 0.548257185   | 5.774470461  |
| H346 | 6.768417056  | -8.950660217  | -2.961021108 |
| H347 | 6.650857918  | -6.777399546  | 0.437442688  |
| H348 | 2.270038235  | -4.611325065  | -6.102432672 |
| H349 | 5.962563509  | 2.488647882   | -6.911647375 |
| H350 | 5.769858528  | 1.125751197   | 5.978592659  |
| H351 | 6.465315265  | 1.132325202   | 4.338935108  |
| H352 | 10.053521730 | -7.620865381  | -1.854294115 |
| H353 | 9.246851965  | -8.874481077  | -1.179921586 |
| H354 | 9.851314151  | -8.647874605  | 3.374781712  |
| H355 | 8.462103975  | -8.531008291  | 1.563697186  |
| H356 | 11.788105517 | -8.129947203  | 1.514613451  |
| H357 | 9.715003653  | -6.875078310  | 3.427131234  |
| H358 | 8.943883896  | 0.652913488   | 5.365142305  |
| H359 | -2.866312326 | 13.678886948  | -0.594013619 |
| H360 | 7.865122730  | -5.002166531  | 9.660088256  |
| H361 | 7.844779556  | -2.974604872  | 7.810990635  |
| H362 | -4.139286409 | 12.344275822  | -3.006982936 |
| H363 | -3.886324918 | 10.810328314  | -0.346406156 |
| H364 | -5.399298228 | 11.323660511  | -1.111556370 |
| H365 | -5.119527863 | 6.231942295   | -5.097298787 |
| H366 | 2.330274247  | -1.084614458  | 0.671547594  |

|       |              |              |              |
|-------|--------------|--------------|--------------|
| H367  | 0.049342503  | -1.279523513 | -0.210231796 |
| H368  | 1.350535868  | -3.215509241 | 0.334075496  |
| H369  | -1.374901615 | -0.153265220 | -1.163286770 |
| Mo370 | 4.103384688  | -4.733805568 | -0.215319560 |
| N371  | -6.809038606 | -6.980539399 | -0.701323129 |
| N372  | -9.121642431 | -4.116896279 | -0.074682727 |
| N373  | -9.707797251 | -3.762707765 | 2.673761087  |
| N374  | -7.401383374 | -4.742188167 | 3.947565707  |
| N375  | -5.404211392 | -2.905698986 | 2.989176856  |
| N376  | -6.389269679 | -0.496812267 | 4.157342553  |
| N377  | -6.566672532 | -1.097173890 | 6.983878367  |
| N378  | -4.186493102 | -2.487364688 | 7.823788120  |
| N379  | -1.964018851 | -1.253936711 | 6.695567195  |
| N380  | -2.158193164 | 1.684234790  | 6.180345309  |
| N381  | -3.623345348 | 2.438251792  | 8.582398657  |
| N382  | 3.163079709  | -9.326150142 | 9.408329817  |
| N383  | 4.390385556  | -7.593066049 | 7.766380505  |
| N384  | 4.115274525  | -2.145975610 | 4.722710307  |
| N385  | 2.913919361  | -0.425676324 | 5.761212128  |
| N386  | 3.864792927  | -0.101961929 | 3.659860613  |
| N387  | 7.250924107  | -5.545842056 | 7.764027681  |
| N388  | -5.020836817 | -3.472393701 | -3.541195271 |
| N389  | -1.215364962 | -5.941860756 | -2.028108147 |
| N390  | -5.194546773 | -0.806022898 | -3.540555433 |
| N391  | -7.685398479 | 0.395936772  | -3.328099047 |
| N392  | -7.869597605 | 0.762599123  | -0.549006376 |
| N393  | -5.789417775 | 2.578319583  | 0.092522759  |
| N394  | -2.478016967 | 2.460981682  | -2.587018118 |
| N395  | -1.887501077 | 0.692115905  | -1.409341423 |
| N396  | -6.494691721 | 5.236751737  | -0.355380332 |
| N397  | -9.091779485 | 7.709193331  | -3.444231533 |
| N398  | -9.321683337 | 9.770567066  | -2.656177495 |
| N399  | 8.275513793  | 3.092019788  | 4.764352930  |
| N400  | 6.740464576  | 7.345918689  | -0.194968764 |
| N401  | 5.565448682  | 7.563362464  | -3.526389561 |
| N402  | 3.157994134  | 6.564230748  | -4.501291150 |
| N403  | -1.064432435 | 4.867202351  | -6.480465729 |
| N404  | -0.468787832 | 6.395431878  | -8.154033052 |
| N405  | -2.205944743 | 6.879277494  | -6.696428855 |
| N406  | 1.435867230  | 6.019883358  | -2.263477239 |
| N407  | 1.359223708  | 8.581946792  | -1.136638094 |
| N408  | 0.353067518  | 10.890169844 | -2.458025693 |
| N409  | -0.235832721 | 9.281867040  | -5.250117087 |
| N410  | -2.249200156 | 11.815850046 | -2.255206318 |
| N411  | 6.379997749  | -6.884265202 | -7.494443629 |
| N412  | 4.318777415  | -4.284464764 | -6.071280292 |
| N413  | 3.235813042  | -1.478111937 | -6.583466568 |
| N414  | 5.232001858  | 0.561824031  | -6.570577835 |
| N415  | 0.896767463  | -5.410961010 | -9.106486695 |
| N416  | -0.970012943 | -3.289621415 | -8.487968422 |
| N417  | 9.114880312  | -7.960735945 | -1.625952422 |
| N418  | 4.976541313  | -6.532310240 | -1.564796665 |
| N419  | 4.951430337  | -7.839583943 | -3.344552468 |
| N420  | 9.196806436  | -7.823919428 | 1.589146702  |
| N421  | 0.433695843  | 1.912507342  | 0.546374741  |
| N422  | 1.194582148  | 1.199219383  | 0.107913950  |
| O423  | -7.110415499 | -4.604640769 | 0.875644570  |
| O424  | -8.614639988 | -1.766749082 | 2.606244793  |
| O425  | -7.954261428 | -3.525667987 | 5.803319490  |
| O426  | -4.372091149 | -3.224010669 | 4.991915078  |
| O427  | -4.229533852 | 0.216115466  | 4.244448519  |

|      |              |               |              |
|------|--------------|---------------|--------------|
| O428 | -5.941710898 | 1.075785757   | 7.310435573  |
| O429 | -4.563176698 | -1.704760442  | 9.948185722  |
| O430 | -0.523096710 | -2.612432387  | 7.867030623  |
| O431 | -0.031969963 | 1.527294276   | 7.004161717  |
| O432 | -1.986175175 | 3.991439697   | 8.818757543  |
| O433 | -2.826659467 | 2.870313050   | 12.053824175 |
| O434 | 5.343989327  | -9.264676285  | 6.482484763  |
| O435 | 5.646390085  | -5.654406743  | 9.406976546  |
| O436 | 9.734369834  | -3.084330646  | 8.569629568  |
| O437 | -5.474367960 | -0.690799269  | -1.264689952 |
| O438 | -2.791217139 | -5.260956863  | -3.520696461 |
| O439 | -6.685047781 | 2.410908129   | -2.946539242 |
| O440 | -5.142219355 | 2.251784896   | -5.677587640 |
| O441 | -9.904346163 | 1.801117576   | -0.805268442 |
| O442 | -6.540325286 | 2.725761932   | 2.243412555  |
| O443 | -4.961658919 | 5.872742359   | 1.207152788  |
| O444 | -7.505512552 | 8.259452916   | 1.187198600  |
| O445 | 8.457163940  | 0.716287104   | 7.346855476  |
| O446 | 2.571559258  | 5.832055753   | 3.552999895  |
| O447 | 4.348957765  | 8.213111349   | -1.715657036 |
| O448 | 2.601499255  | 8.618952617   | -5.369489310 |
| O449 | -0.287880468 | 6.442749841   | -3.707867497 |
| O450 | -0.612297904 | 8.068622965   | -0.089305329 |
| O451 | 2.235764500  | 6.181506972   | 0.684971668  |
| O452 | 1.210113241  | 12.242709287  | -0.823294358 |
| O453 | -1.785244558 | 13.666255340  | -3.504570841 |
| O454 | -2.002834134 | 10.714065000  | -5.460912775 |
| O455 | -4.774619740 | 14.115635652  | -1.175351553 |
| O456 | -4.293817377 | 6.290734254   | -4.578440680 |
| O457 | 3.783006900  | -6.439292321  | -6.663085370 |
| O458 | 1.938550659  | -2.835390253  | -7.894399992 |
| O459 | 4.121365272  | 1.664486596   | -8.238937753 |
| O460 | 8.619348515  | 1.652983723   | -7.199830497 |
| O461 | -2.566961764 | -4.839796904  | -8.993574968 |
| O462 | -0.069022726 | -7.782132217  | -4.299247216 |
| O463 | 2.008291826  | -7.146311424  | -4.811411589 |
| O464 | -1.548434827 | 0.115208072   | -9.404915086 |
| O465 | 10.242375791 | -6.028900634  | 0.685629156  |
| O466 | 12.316518222 | -7.171890640  | 3.235713679  |
| O467 | -0.411282340 | -6.064863847  | 0.983989498  |
| O468 | -0.365475059 | -7.813104301  | 2.359404976  |
| O469 | 4.803563055  | -11.246918719 | 1.065790337  |
| O470 | 2.745988114  | -11.179535481 | 0.136385713  |
| O471 | 4.952967027  | -5.912644723  | 1.535219565  |
| O472 | 4.294701029  | -7.174125935  | 3.283053459  |
| O473 | 2.722847527  | -6.281216430  | 0.182477975  |
| O474 | 7.954520829  | -5.968131079  | 5.030726281  |
| O475 | 6.559273970  | -4.291191067  | 3.223303105  |
| O476 | -3.166533602 | 3.922848161   | -4.776551955 |
| O477 | 7.383765813  | -10.549170973 | 2.646824773  |
| O478 | 6.579766003  | -8.257926392  | 4.192335032  |
| S479 | 4.445851322  | 4.454193348   | -2.100737996 |
| S480 | 2.806401299  | 1.376519524   | -2.538331638 |
| S481 | 2.709736172  | -3.975038689  | -1.948314810 |
| S482 | 3.908933988  | 1.710689157   | 0.617263763  |
| S483 | 0.868121621  | -1.368694228  | -1.299277486 |
| S484 | 5.123894319  | -1.737677366  | -3.993998849 |
| S485 | 3.427862131  | -3.315341827  | 1.563860183  |
| S486 | 6.335009997  | 1.055711346   | -1.905064867 |
| S487 | 6.185804332  | -3.722931787  | -0.836524660 |
| S488 | 6.309468720  | -0.902018694  | 1.615295158  |

|             |       |        |                              |              |               |              |
|-------------|-------|--------|------------------------------|--------------|---------------|--------------|
| <b>3(a)</b> |       |        | bm1cnx2b6x2hn2n2x35unh.car_3 |              |               |              |
| Fe( 139)    | 0.556 | -2.426 | C1                           | -7.896835691 | -5.082363387  | -0.942234980 |
| Fe( 140)    | 0.333 | -0.018 | C2                           | -7.884476055 | -6.252301404  | -1.933168682 |
| Fe( 141)    | 0.544 | -2.590 | C3                           | -9.108840971 | -3.096466492  | -0.146879968 |
| Fe( 142)    | 0.548 | 2.605  | C4                           | -9.059593161 | -3.333405998  | 1.360538402  |
| Fe( 143)    | 0.506 | 1.750  | C5                           | -9.536111520 | -4.830092903  | 3.230230086  |
| Fe( 144)    | 0.514 | 2.330  | C6                           | -8.120296110 | -5.097986884  | 3.753584429  |
| Fe( 145)    | 0.195 | 0.243  | C7                           | -5.843568747 | -5.808636467  | 3.196786534  |
| <b>S=1</b>  |       |        | C8                           | -5.072177094 | -4.487668025  | 3.275361762  |
|             |       |        | C9                           | -4.666153822 | -2.282219532  | 2.315148581  |
|             |       |        | C10                          | -5.073214093 | -1.432497713  | 3.527274520  |
|             |       |        | C11                          | -6.830099605 | -0.731031611  | 5.051570111  |
|             |       |        | C12                          | -6.380437648 | -1.304668816  | 6.403380816  |
|             |       |        | C13                          | -6.324662628 | -3.271195670  | 7.863457114  |
|             |       |        | C14                          | -4.896097437 | -3.722403823  | 8.189654521  |
|             |       |        | C15                          | -2.801308395 | -4.675107262  | 7.322050816  |
|             |       |        | C16                          | -1.620294042 | -3.777579002  | 6.939275749  |
|             |       |        | C17                          | -0.949894323 | -1.687114336  | 5.784466280  |
|             |       |        | C18                          | -1.035879154 | -0.331484608  | 6.508128595  |
|             |       |        | C19                          | -1.028778453 | -1.577594418  | 4.238360099  |
|             |       |        | C20                          | -0.091123341 | -0.498904967  | 3.685862148  |
|             |       |        | C21                          | -0.737039159 | -2.934966084  | 3.586652608  |
|             |       |        | C22                          | -2.407542822 | 1.639393390   | 7.059565417  |
|             |       |        | C23                          | -2.710394052 | 1.461692643   | 8.560965887  |
|             |       |        | C24                          | -3.479500131 | 2.487849663   | 6.333900696  |
|             |       |        | C25                          | -3.767933563 | 3.781956450   | 7.103857103  |
|             |       |        | C26                          | -3.042309063 | 2.807586566   | 4.898624885  |
|             |       |        | C27                          | -4.072443471 | 0.443862904   | 10.291578823 |
|             |       |        | C28                          | -2.879818138 | 0.093741195   | 11.159344212 |
|             |       |        | C29                          | 4.056390657  | -11.236827502 | 6.103666713  |
|             |       |        | C30                          | 4.840508813  | -10.053486570 | 5.530896258  |
|             |       |        | C31                          | 5.183743171  | -7.591529008  | 5.792610544  |
|             |       |        | C32                          | 6.122641524  | -7.190307033  | 6.946809302  |
|             |       |        | C33                          | 4.097465344  | -6.529755301  | 5.549622354  |
|             |       |        | C34                          | 4.659060108  | -5.148766589  | 5.201784715  |
|             |       |        | C35                          | 3.562127101  | -4.224949451  | 4.672533778  |
|             |       |        | C36                          | 3.620835562  | -1.728590705  | 4.518095024  |
|             |       |        | C37                          | 8.377309016  | -6.430108007  | 7.534956169  |
|             |       |        | C38                          | 8.699351150  | -4.951243098  | 7.523211673  |
|             |       |        | C39                          | -4.731589210 | -2.510052670  | -2.796826726 |
|             |       |        | C40                          | -5.217162652 | -1.069358827  | -2.578300664 |
|             |       |        | C41                          | -3.248281453 | -2.589081326  | -2.372088775 |
|             |       |        | C42                          | -2.698944299 | -4.015804509  | -2.160043280 |
|             |       |        | C43                          | -2.084189216 | -4.669602998  | -3.395177962 |
|             |       |        | C44                          | -5.458196910 | 1.106443125   | -3.724340298 |
|             |       |        | C45                          | -6.885849468 | 1.588336273   | -3.435824829 |
|             |       |        | C46                          | -4.936956778 | 1.724811731   | -5.037656574 |
|             |       |        | C47                          | -9.095035044 | 0.961639616   | -2.574958002 |
|             |       |        | C48                          | -9.048262929 | 1.106467025   | -1.045239662 |
|             |       |        | C49                          | -7.736164078 | 0.797046471   | 1.008960643  |
|             |       |        | C50                          | -6.769472854 | 1.873331084   | 1.511138087  |
|             |       |        | C51                          | -4.877151765 | 3.371860141   | 1.035241936  |
|             |       |        | C52                          | -5.530804582 | 4.695338929   | 1.466489436  |
|             |       |        | C53                          | -3.920483713 | 3.718938883   | -0.120022321 |
|             |       |        | C54                          | -3.179841913 | 2.550611732   | -0.681299972 |
|             |       |        | C55                          | -2.919879961 | 1.277671455   | -0.212683618 |
|             |       |        | C56                          | -1.925325944 | 1.406721921   | -2.113703577 |
|             |       |        | C57                          | -7.219956636 | 6.359067360   | 0.802914886  |
|             |       |        | C58                          | -7.699917585 | 6.598445922   | 2.232709252  |
|             |       |        | C59                          | -8.412649160 | 6.385148051   | -0.182932461 |



|      |              |              |              |
|------|--------------|--------------|--------------|
| C60  | -8.895689936 | 7.740037052  | -0.609068131 |
| C61  | -9.090759556 | 8.900134552  | 0.115668201  |
| C62  | -9.621819160 | 9.220661257  | -2.011648200 |
| C63  | 7.467417372  | 1.343138097  | 6.192238009  |
| C64  | 8.342261202  | 0.118990220  | 6.391873675  |
| C65  | 6.165088576  | 0.861592073  | 5.505293206  |
| C66  | 5.159403102  | 1.971760606  | 5.307880763  |
| C67  | 4.203461710  | 2.273270570  | 6.295699685  |
| C68  | 5.154447800  | 2.739961907  | 4.130803107  |
| C69  | 3.268505501  | 3.297599686  | 6.114676160  |
| C70  | 4.236280662  | 3.773480992  | 3.941055557  |
| C71  | 3.291696960  | 4.050105325  | 4.933521770  |
| C72  | 6.008885277  | 6.906663158  | 0.028395154  |
| C73  | 5.091855352  | 7.948468535  | -0.621991397 |
| C74  | 5.222179361  | 5.622275119  | 0.318117803  |
| C75  | 4.594502586  | 9.235466732  | -2.656529962 |
| C76  | 3.222532615  | 8.749130650  | -3.123435460 |
| C77  | 1.726220261  | 6.809670010  | -3.433741675 |
| C78  | 0.772812262  | 6.742642165  | -2.220319989 |
| C79  | 1.983347576  | 5.441353490  | -4.085881414 |
| C80  | 0.769833679  | 4.671318173  | -4.612774790 |
| C81  | 0.038239388  | 5.271436845  | -5.826310444 |
| C82  | -1.355405844 | 7.338578188  | -5.868615992 |
| C83  | 0.460913486  | 6.321878726  | 0.157642793  |
| C84  | 0.201726920  | 7.694665583  | 0.806413567  |
| C85  | 1.011670951  | 5.375748706  | 1.235434705  |
| C86  | 1.228026495  | 9.803917513  | 1.501776049  |
| C87  | 0.700823988  | 11.145139480 | 1.000312082  |
| C88  | -0.348664918 | 12.416964223 | -0.823736124 |
| C89  | -1.774405614 | 12.874417099 | -0.444515778 |
| C90  | -0.175587505 | 12.378929990 | -2.357458567 |
| C91  | -1.062736458 | 11.322361028 | -3.006262513 |
| C92  | -3.955191239 | 12.218164925 | 0.471805883  |
| C93  | -4.117121419 | 13.307584490 | 1.524193679  |
| C94  | -4.644774138 | 10.913547987 | 0.954562635  |
| C95  | -4.639297964 | 9.842200239  | -0.111119724 |
| C96  | -5.622445065 | 9.832609606  | -1.113509404 |
| C97  | -3.622240097 | 8.874453993  | -0.170591260 |
| C98  | -5.579968670 | 8.907184998  | -2.158837493 |
| C99  | -3.551436060 | 7.953047067  | -1.220425638 |
| C100 | -4.531382779 | 7.987653048  | -2.212415566 |
| C101 | 6.332305124  | -4.255272195 | -7.463989225 |
| C102 | 4.835738861  | -4.016620916 | -7.344571685 |
| C103 | 3.100261163  | -2.456197025 | -6.490025088 |
| C104 | 2.758765386  | -1.150486203 | -7.217278985 |
| C105 | 3.078047762  | 1.275708995  | -7.212653343 |
| C106 | 4.192842629  | 2.303831086  | -7.048577505 |
| C107 | 6.292910986  | 2.972346424  | -5.982356590 |
| C108 | 7.520948926  | 2.747522295  | -6.843850433 |
| C109 | -0.180049192 | -3.882876984 | -9.380971825 |
| C110 | -1.242677518 | -2.776517883 | -9.409287278 |
| C111 | -0.084967602 | -4.471814819 | -7.954829122 |
| C112 | 0.652816947  | -5.823930904 | -7.950297766 |
| C113 | 0.990073698  | -6.240740397 | -6.535721958 |
| C114 | -1.811254498 | -0.453066904 | -8.906302563 |
| C115 | -1.186702137 | 0.821254780  | -9.439671595 |
| C116 | -2.556935780 | -0.294539972 | -7.558259613 |
| C117 | -1.572973335 | -0.237724593 | -6.426993044 |
| C118 | -0.943154868 | 0.968028038  | -6.080529474 |
| C119 | -1.133959059 | -1.431216782 | -5.827796633 |
| C120 | 0.161841029  | 0.959463698  | -5.225023547 |

|       |               |               |              |
|-------|---------------|---------------|--------------|
| C121  | -0.028151152  | -1.435477670  | -4.978181233 |
| C122  | 0.648507764   | -0.241527790  | -4.711306837 |
| C123  | 8.708610732   | -6.509432732  | -1.959738123 |
| C124  | 9.555581767   | -6.611306264  | -0.680690711 |
| C125  | 7.270428136   | -7.012018130  | -1.757632673 |
| C126  | 6.321944527   | -6.760250721  | -2.889793386 |
| C127  | 6.320323730   | -7.369202811  | -4.129285469 |
| C128  | 4.544450737   | -6.058647296  | -3.949702542 |
| C129  | 10.215576503  | -7.858158268  | 1.300431376  |
| C130  | 11.690949352  | -7.682782622  | 1.023780854  |
| C131  | 0.419703880   | -6.949914708  | 0.411457647  |
| C132  | 1.772859728   | -6.673246341  | 1.005946440  |
| C133  | 2.959427040   | -7.003044243  | 0.013220122  |
| C134  | 2.885150194   | -8.494942749  | -0.424220273 |
| C135  | 4.103056371   | -8.914218545  | -1.263911362 |
| C136  | 4.192470820   | -10.394370805 | -1.497448859 |
| C137  | 4.278830522   | -6.847142315  | 0.830460995  |
| C138  | 4.117521710   | -0.847552694  | -1.113100763 |
| Fe139 | 4.630325529   | -2.128759992  | -2.499266623 |
| Fe140 | 2.489112021   | 0.300657784   | -0.574436373 |
| Fe141 | 5.302399104   | 0.303703133   | 0.038546599  |
| Fe142 | 4.567568076   | 0.458891119   | -2.457868659 |
| Fe143 | 4.555005306   | 2.639316417   | -0.893652669 |
| Fe144 | 5.095407498   | -2.209806590  | 0.028357053  |
| Fe145 | 2.592594216   | -2.333206427  | -0.726255046 |
| H146  | -6.179782834  | -7.128158597  | -1.238026931 |
| H147  | -5.948041274  | -6.248454465  | -2.592618280 |
| H148  | -9.704226670  | -4.449100166  | -1.689876556 |
| H149  | -8.288579001  | -5.912984205  | -2.899959090 |
| H150  | -8.603523323  | -6.997180931  | -1.549067675 |
| H151  | -8.286705005  | -2.402375054  | -0.374362077 |
| H152  | -9.990875532  | -5.151571791  | 1.150183880  |
| H153  | -10.056870416 | -2.597223828  | -0.388144889 |
| H154  | -10.152013772 | -5.722761274  | 3.401647010  |
| H155  | -7.513972462  | -5.677048859  | 1.878742517  |
| H156  | -9.945219489  | -4.006970365  | 3.831186109  |
| H157  | -3.574428848  | -2.388764201  | 2.358047782  |
| H158  | -5.903284790  | -3.846060894  | 1.493842329  |
| H159  | -5.382215136  | -6.457194550  | 2.439149474  |
| H160  | -6.450603363  | 0.296327712   | 4.990965760  |
| H161  | -7.052393472  | -2.020083527  | 3.341413409  |
| H162  | -5.747649235  | -6.294298676  | 4.175157861  |
| H163  | -4.923284101  | -1.753559539  | 1.385776506  |
| H164  | -6.965624937  | -3.207986623  | 5.829174696  |
| H165  | -7.928215399  | -0.699077383  | 5.031495968  |
| H166  | -1.437445828  | -3.711560516  | 3.924766548  |
| H167  | -0.817517449  | -2.854849214  | 2.491970827  |
| H168  | 0.288328406   | -3.266694251  | 3.813469063  |
| H169  | -2.062593402  | -1.289323329  | 3.986932325  |
| H170  | -6.971136565  | -4.159127680  | 7.921068277  |
| H171  | -2.878398970  | 1.902366834   | 4.297664045  |
| H172  | -4.287013620  | 0.147565289   | 8.185160227  |
| H173  | -4.155726004  | 3.590795687   | 8.115056843  |
| H174  | -0.230773042  | -0.403024459  | 2.600741607  |
| H175  | 0.963164151   | -0.763476851  | 3.849483422  |
| H176  | 7.199228913   | 1.722988430   | 7.196969263  |
| H177  | -3.812342339  | 3.413173935   | 4.398394352  |
| H178  | -4.514422502  | 4.382816627   | 6.563485854  |
| H179  | -2.106656556  | 3.389965248   | 4.903097662  |
| H180  | -2.853258431  | 4.388081071   | 7.200787874  |
| H181  | -4.410278020  | 1.893609803   | 6.296077243  |

|      |              |              |               |
|------|--------------|--------------|---------------|
| H182 | -1.447143783 | 2.175471959  | 7.034379374   |
| H183 | -2.940109918 | 0.009515381  | 5.762271885   |
| H184 | -0.273934262 | 0.489551879  | 4.134433493   |
| H185 | 1.334800771  | 4.434256974  | 0.758387694   |
| H186 | 0.182441091  | 5.154643054  | 1.925837726   |
| H187 | 2.122644756  | 5.631961489  | 2.835790075   |
| H188 | 1.756817965  | 5.135503751  | 5.419391140   |
| H189 | 4.225153041  | 4.338448275  | 3.007877037   |
| H190 | 5.851284760  | 2.500996454  | 3.324149359   |
| H191 | 4.178750455  | 1.692240319  | 7.221728823   |
| H192 | -2.923527037 | -2.466716983 | 6.088438890   |
| H193 | -2.706988347 | -5.597604672 | 6.730150557   |
| H194 | -2.678200699 | -4.937709203 | 8.381042426   |
| H195 | -4.521907585 | -4.153543736 | 6.189973993   |
| H196 | -6.622155720 | -2.577692652 | 8.660281255   |
| H197 | 2.519794301  | 3.503836111  | 6.884322108   |
| H198 | 0.025873313  | -2.101176059 | 6.070538085   |
| H199 | -4.558449344 | 1.344137728  | 10.700959752  |
| H200 | -4.784707753 | -0.393412498 | 10.362758036  |
| H201 | -2.054818773 | -0.441070135 | 10.633441782  |
| H202 | 9.304831904  | -7.005011386 | 7.390120965   |
| H203 | -0.546270498 | -5.891714078 | -3.975102417  |
| H204 | 0.488322039  | -8.679948014 | 1.260339243   |
| H205 | 0.002323965  | -6.591854738 | -8.393718739  |
| H206 | 1.569902050  | -5.759584610 | -8.553634190  |
| H207 | -1.091406148 | -4.615137245 | -7.531386625  |
| H208 | -0.341697222 | 0.654577617  | -10.148864553 |
| H209 | -0.600900523 | -4.660486258 | -10.036171115 |
| H210 | -2.638441149 | -2.057303588 | -3.119205152  |
| H211 | -3.506022136 | -4.684617467 | -1.812784390  |
| H212 | 0.094994844  | -1.401526719 | -8.613357086  |
| H213 | -2.574832064 | -0.705708387 | -9.669780864  |
| H214 | 1.592849075  | -2.805073869 | -9.362214020  |
| H215 | -0.566433060 | -5.518688155 | -2.253960267  |
| H216 | 0.425550297  | -3.742179339 | -7.307624849  |
| H217 | 1.683833930  | -4.242140634 | -10.160803644 |
| H218 | -5.799957855 | -3.388892135 | -4.333075648  |
| H219 | -3.128856742 | -2.026167256 | -1.436515414  |
| H220 | 2.804871095  | -5.530184747 | -6.823876941  |
| H221 | -1.953961736 | -3.997707262 | -1.352248870  |
| H222 | -4.315703995 | 2.994057181  | 1.902117137   |
| H223 | -3.241289720 | 0.836876008  | 0.728577763   |
| H224 | -8.713748848 | 1.017727701  | 1.455406994   |
| H225 | -7.146610998 | 0.260265159  | -0.972642427  |
| H226 | -6.969368023 | 4.369634218  | 0.047722065   |
| H227 | -8.924771099 | 9.145979091  | 1.158888397   |
| H228 | -8.040559885 | 5.669627869  | 2.750479529   |
| H229 | -9.240153434 | 5.781349172  | 0.231289754   |
| H230 | -6.494452753 | 7.145926279  | 0.540518304   |
| H231 | -9.957357903 | 9.736984342  | -2.907596431  |
| H232 | -3.216243494 | 4.474313311  | 0.266094262   |
| H233 | -4.499882334 | 4.214584164  | -0.917875542  |
| H234 | -9.781769730 | 10.797901400 | -0.590395313  |
| H235 | -8.090086792 | 5.871776703  | -1.102601557  |
| H236 | -5.688580100 | 1.871959220  | -0.247369726  |
| H237 | -7.407448954 | -0.169567297 | 1.419139234   |
| H238 | -9.470558754 | 1.911556731  | -2.976234114  |
| H239 | -1.323928588 | 1.197740958  | -2.995217116  |
| H240 | -9.823155669 | 0.178136030  | -2.823674857  |
| H241 | 8.888929645  | 2.793099911  | 5.911529031   |
| H242 | 7.526511228  | 3.035288671  | 5.042475659   |

|      |              |              |              |
|------|--------------|--------------|--------------|
| H243 | 2.266406375  | 5.966303406  | -0.985602677 |
| H244 | -0.523596352 | 5.942251467  | -0.152083538 |
| H245 | 2.036280641  | 8.368273350  | 0.181681573  |
| H246 | -2.553283461 | 3.422789623  | -2.544696475 |
| H247 | -3.790715653 | 4.235393365  | -4.332972633 |
| H248 | -3.708774967 | 5.556588803  | -3.462737631 |
| H249 | -3.886791445 | 1.434261785  | -5.181161005 |
| H250 | -5.529350095 | 1.346363483  | -5.888962588 |
| H251 | 0.887405173  | 12.213785734 | -2.585862553 |
| H252 | -0.473325940 | 13.360062107 | -2.749352629 |
| H253 | 0.564030257  | 10.003096538 | -3.276799715 |
| H254 | -1.028829845 | 9.380805304  | -3.646026601 |
| H255 | -0.814520227 | 8.882952919  | -7.101838032 |
| H256 | -0.327754203 | 4.461681089  | -6.476223301 |
| H257 | -6.360318587 | 8.903596876  | -2.923254963 |
| H258 | -2.860599130 | 8.819139569  | 0.612844237  |
| H259 | -2.907340737 | 7.645960549  | -4.548688499 |
| H260 | 2.496991760  | 4.792978826  | -3.358037577 |
| H261 | 3.717358704  | 6.804274972  | -2.660141901 |
| H262 | 0.049695345  | 4.464111992  | -3.806416542 |
| H263 | -7.539810801 | -0.326884178 | -3.299981989 |
| H264 | 5.161344089  | 9.551065842  | -3.543013689 |
| H265 | -5.055610756 | -0.884066035 | -4.560741922 |
| H266 | 2.689706641  | 5.606359796  | -4.916662467 |
| H267 | -2.722765003 | 7.244908783  | -1.281457892 |
| H268 | -5.834799292 | 3.368320274  | -4.505275515 |
| H269 | 4.413412286  | 10.124558682 | -2.037033881 |
| H270 | -0.091801445 | 7.362521592  | -7.492288767 |
| H271 | -2.751230920 | 8.828207590  | -5.793884669 |
| H272 | -4.141651699 | -3.546371183 | -4.471115947 |
| H273 | -5.319100130 | -3.124752082 | -2.088659301 |
| H274 | -6.437447620 | 10.558947105 | -1.084513529 |
| H275 | -4.856646311 | 1.521781217  | -2.896584485 |
| H276 | 1.233411365  | 7.485790574  | -4.144966037 |
| H277 | 0.741665582  | 5.865955060  | -6.424173622 |
| H278 | 1.160147244  | 3.696052988  | -4.927969726 |
| H279 | -1.820330514 | 5.662128645  | -4.828647278 |
| H280 | 0.671077978  | 9.575816001  | 2.422766931  |
| H281 | 0.079950842  | 10.300620658 | -0.762611580 |
| H282 | 0.311759782  | 13.200668298 | -0.424569655 |
| H283 | 2.280054509  | 9.965635474  | 1.776356561  |
| H284 | -2.174132323 | 11.031266566 | 0.333978512  |
| H285 | 6.860756222  | -3.291411946 | -7.504104700 |
| H286 | 6.636638180  | -4.746955357 | -6.516755920 |
| H287 | 8.679392682  | -5.437082291 | -2.202912941 |
| H288 | 7.580174324  | -5.401451349 | -8.596928660 |
| H289 | 6.006966387  | -5.848171810 | -8.683663380 |
| H290 | 5.912602724  | 4.885343129  | 0.750054572  |
| H291 | 5.831119637  | 7.726368550  | 1.889191450  |
| H292 | 6.142739532  | 7.785850801  | -2.383574146 |
| H293 | 4.426774649  | 5.841845815  | 1.044748435  |
| H294 | 7.157060164  | 8.240619714  | 1.086088055  |
| H295 | 6.582903409  | 2.948844904  | -4.920662075 |
| H296 | 6.836152666  | 6.671867870  | -0.660568736 |
| H297 | 3.450183639  | -6.470685484 | 6.441000803  |
| H298 | 5.761042268  | -7.732063811 | 4.871213015  |
| H299 | 5.248946394  | 1.148834456  | -5.667578621 |
| H300 | 3.715647522  | 0.250085936  | 4.020015322  |
| H301 | 2.882953021  | 1.173460839  | -8.287847226 |
| H302 | 0.304647022  | -2.365186802 | -4.510201985 |
| H303 | 2.170817981  | 1.726750626  | -6.774419623 |

|      |              |               |              |
|------|--------------|---------------|--------------|
| H304 | 2.795630582  | -4.041740609  | 5.436839756  |
| H305 | 3.759319483  | -0.174504917  | -5.735467539 |
| H306 | 3.053563804  | -4.705821603  | 3.819872670  |
| H307 | 3.477835455  | -6.896132610  | 4.714944728  |
| H308 | 5.431048540  | -5.240014599  | 4.423367787  |
| H309 | 5.132941653  | -4.685490162  | 6.082382843  |
| H310 | -3.239025485 | -1.150193986  | -7.446891274 |
| H311 | 3.936433522  | -8.937254050  | 6.923427735  |
| H312 | 3.284662048  | -11.476097404 | 5.356113865  |
| H313 | 1.524332969  | -0.233088411  | -4.065777037 |
| H314 | 4.029241769  | -11.159383318 | 8.161687597  |
| H315 | 2.574492148  | -11.523952394 | 7.501267776  |
| H316 | 4.601280128  | -2.989254542  | 3.304865020  |
| H317 | 0.654281473  | 1.888917213   | -4.940893300 |
| H318 | -1.653777519 | -2.367498541  | -6.040773753 |
| H319 | 7.335167086  | -10.057234868 | 1.250440118  |
| H320 | 7.298549449  | -8.102205000  | -1.579499182 |
| H321 | 5.994688349  | -8.250409810  | 2.192420403  |
| H322 | 6.875203567  | -10.815940809 | -0.015093653 |
| H323 | 7.385424534  | 2.021974928   | -7.682792985 |
| H324 | 6.161116487  | -5.152647385  | 1.651655872  |
| H325 | 1.920238690  | -7.230229633  | 1.943497571  |
| H326 | 5.193906708  | -2.282030884  | -6.310042437 |
| H327 | 2.831476738  | -9.126837983  | 0.476678375  |
| H328 | 4.881973733  | -7.188192667  | -5.705850580 |
| H329 | 3.611716850  | -5.570594665  | -4.203017624 |
| H330 | 4.750409890  | -12.094121612 | 6.127562555  |
| H331 | 4.390798599  | -0.825004319  | 2.829199430  |
| H332 | 7.704142670  | -5.884470981  | 3.326849401  |
| H333 | 6.880403292  | -3.809074621  | 1.962909272  |
| H334 | 7.613178260  | -6.774844492  | 5.550903595  |
| H335 | 3.015031721  | -2.212436681  | 6.425268255  |
| H336 | 3.251236376  | -11.857908652 | -2.238701140 |
| H337 | 4.057809991  | -8.401465474  | -2.236620679 |
| H338 | 5.037574352  | -8.617881788  | -0.773750934 |
| H339 | 1.967694320  | -8.644067901  | -1.011698048 |
| H340 | 2.973395278  | -2.345251422  | -5.402062877 |
| H341 | -1.293491215 | 1.904475685   | -6.522492921 |
| H342 | -3.163221409 | 0.620956703   | -7.625859229 |
| H343 | 1.840531104  | -5.595652341  | 1.205573612  |
| H344 | 7.709611393  | -7.440051577  | 3.329029998  |
| H345 | 6.422020500  | -9.292579657  | 3.264299196  |
| H346 | 2.559427003  | -0.632651047  | 5.903955240  |
| H347 | 7.007328379  | -8.078879505  | -4.575120113 |
| H348 | 6.855460682  | -6.552362822  | -0.852054812 |
| H349 | 2.432210326  | -3.236469474  | -6.857945101 |
| H350 | 5.910829781  | 3.982299847   | -6.203747291 |
| H351 | 5.730923692  | 0.072006981   | 6.137621751  |
| H352 | 6.426519614  | 0.411436697   | 4.533993627  |
| H353 | 10.301141979 | -6.787535822  | -3.223020386 |
| H354 | 9.540234968  | -8.180839980  | -2.828317832 |
| H355 | 10.074487622 | -8.882439477  | 1.680245717  |
| H356 | 8.703372095  | -8.428626756  | -0.090196225 |
| H357 | 12.005534271 | -7.939250496  | -0.016359705 |
| H358 | 9.895946547  | -7.163094308  | 2.093165940  |
| H359 | 8.956006243  | -0.159263634  | 5.501378701  |
| H360 | -3.218807640 | 13.495306329  | 2.158664804  |
| H361 | 7.978701817  | -6.662981635  | 8.537945402  |
| H362 | 7.873689565  | -4.290496939  | 7.164271973  |
| H363 | -4.457453413 | 12.569143913  | -0.444873031 |
| H364 | -4.139002774 | 10.556089620  | 1.865279383  |

|       |              |               |              |
|-------|--------------|---------------|--------------|
| H365  | -5.675508377 | 11.176908657  | 1.232847499  |
| H366  | 1.371710259  | -3.126559884  | -0.293958828 |
| H367  | -5.223661516 | 7.149698317   | -3.827165708 |
| H368  | 2.303350179  | -1.143156275  | 0.424390977  |
| H369  | -0.020768281 | -1.051034021  | -0.834069659 |
| Mo370 | 4.248769942  | -4.507198700  | -1.114811964 |
| N371  | -6.599227939 | -6.896786425  | -2.142667401 |
| N372  | -9.015231356 | -4.303345599  | -0.955939630 |
| N373  | -9.584404342 | -4.498705671  | 1.815718307  |
| N374  | -7.249296965 | -5.636981377  | 2.862824717  |
| N375  | -5.309594298 | -3.590160630  | 2.284594946  |
| N376  | -6.374760162 | -1.500655632  | 3.904738437  |
| N377  | -6.538834823 | -2.644191464  | 6.568852956  |
| N378  | -4.127488561 | -4.113684022  | 7.134685753  |
| N379  | -1.941760527 | -2.618931564  | 6.309612499  |
| N380  | -2.212121514 | 0.350551317   | 6.392830710  |
| N381  | -3.701772649 | 0.595622004   | 8.894345949  |
| N382  | 3.403374642  | -10.939696305 | 7.383688956  |
| N383  | 4.567307138  | -8.872263161  | 6.117215903  |
| N384  | 4.095835177  | -2.943219016  | 4.195743340  |
| N385  | 2.922781225  | -1.549695937  | 5.662971600  |
| N386  | 3.801590450  | -0.704100742  | 3.678413860  |
| N387  | 7.366825520  | -6.806938245  | 6.564678344  |
| N388  | -4.909324535 | -2.905274362  | -4.199863777 |
| N389  | -0.985503579 | -5.419260087  | -3.180484812 |
| N390  | -5.293033107 | -0.334734418  | -3.720211035 |
| N391  | -7.822017276 | 0.645147016   | -3.196076446 |
| N392  | -7.906786059 | 0.691416591   | -0.429332352 |
| N393  | -5.879296146 | 2.392904348   | 0.608087813  |
| N394  | -2.535378883 | 2.616035981   | -1.906142050 |
| N395  | -2.146444089 | 0.573868015   | -1.106967065 |
| N396  | -6.610231184 | 5.044405483   | 0.718857911  |
| N397  | -9.232482483 | 7.954013658   | -1.936585249 |
| N398  | -9.550658229 | 9.829423389   | -0.794359874 |
| N399  | 8.179502456  | 2.310805632   | 5.353809015  |
| N400  | 6.594781089  | 7.407475026   | 1.283716589  |
| N401  | 5.383194795  | 8.272170462   | -1.915233365 |
| N402  | 3.011388523  | 7.416315665   | -3.094427336 |
| N403  | -1.111687895 | 6.101110475   | -5.450862807 |
| N404  | -0.611957795 | 7.926588889   | -6.829262765 |
| N405  | -2.316648519 | 8.077758434   | -5.263322151 |
| N406  | 1.314226384  | 6.383428838   | -1.025899407 |
| N407  | 1.149231455  | 8.660423127   | 0.603348700  |
| N408  | 0.062550067  | 11.157277830  | -0.207088121 |
| N409  | -0.453637926 | 10.142275580  | -3.287624578 |
| N410  | -2.550422303 | 11.965690669  | 0.192508385  |
| N411  | 6.628922808  | -5.034228719  | -8.670010274 |
| N412  | 4.474991545  | -2.859626482  | -6.759829640 |
| N413  | 3.297917148  | -0.047156198  | -6.662999704 |
| N414  | 5.237939860  | 2.008443116   | -6.232652744 |
| N415  | 1.078882714  | -3.436036550  | -9.990356133 |
| N416  | -0.858257292 | -1.547582709  | -8.962877755 |
| N417  | 9.374902269  | -7.201041291  | -3.080954895 |
| N418  | 5.199969065  | -5.938306606  | -2.798748618 |
| N419  | 5.195489624  | -6.912012776  | -4.780069376 |
| N420  | 9.417364000  | -7.724252288  | 0.092120126  |
| N421  | 0.308153930  | 1.723829615   | 0.782769320  |
| N422  | 1.134106676  | 1.164934209   | 0.248079559  |
| O423  | -6.970861630 | -4.884169440  | -0.133813302 |
| O424  | -8.571116327 | -2.479496092  | 2.117180165  |
| O425  | -7.822304682 | -4.858155187  | 4.934918397  |

|      |               |               |              |
|------|---------------|---------------|--------------|
| O426 | -4.284657336  | -4.251473303  | 4.205542154  |
| O427 | -4.249626744  | -0.714616434  | 4.117049645  |
| O428 | -5.943027539  | -0.564093730  | 7.300755135  |
| O429 | -4.517809470  | -3.761703893  | 9.368140002  |
| O430 | -0.463788934  | -4.145176618  | 7.192444758  |
| O431 | -0.075655713  | 0.101066107   | 7.164205487  |
| O432 | -2.080695959  | 2.089689675   | 9.428897997  |
| O433 | -2.837834664  | 0.310211206   | 12.361784332 |
| O434 | 5.628746966   | -10.233633817 | 4.578288428  |
| O435 | 5.732413756   | -7.230383578  | 8.126966948  |
| O436 | 9.767990193   | -4.491941644  | 7.893398883  |
| O437 | -5.516509674  | -0.623303755  | -1.451487481 |
| O438 | -2.582200816  | -4.537894719  | -4.537306873 |
| O439 | -7.119714379  | 2.814752024   | -3.379303071 |
| O440 | -4.997122404  | 3.158125129   | -4.996507181 |
| O441 | -10.033730683 | 1.569043577   | -0.453812164 |
| O442 | -6.821742548  | 2.251980888   | 2.684974415  |
| O443 | -5.044979111  | 5.424514280   | 2.337542651  |
| O444 | -7.764231059  | 7.692641615   | 2.767146397  |
| O445 | 8.375175073   | -0.540196293  | 7.421370235  |
| O446 | 2.394733853   | 5.071132490   | 4.685016281  |
| O447 | 4.148559491   | 8.481922838   | -0.010933138 |
| O448 | 2.390977482   | 9.587079503   | -3.529454125 |
| O449 | -0.427841487  | 7.035276967   | -2.362321451 |
| O450 | -0.802742026  | 7.870644421   | 1.509360533  |
| O451 | 2.094664875   | 6.003175694   | 1.930898280  |
| O452 | 0.839702965   | 12.159030194  | 1.697370258  |
| O453 | -2.158372674  | 14.024072363  | -0.705793392 |
| O454 | -2.274333677  | 11.518729352  | -3.194727277 |
| O455 | -5.165104042  | 13.909948848  | 1.697886637  |
| O456 | -4.417435750  | 7.085631947   | -3.279799830 |
| O457 | 4.019407805   | -4.884094661  | -7.750298201 |
| O458 | 2.058447075   | -1.135736915  | -8.254716002 |
| O459 | 4.081987599   | 3.386945328   | -7.648736404 |
| O460 | 8.583816939   | 3.318163128   | -6.657319751 |
| O461 | -2.401972608  | -3.010136969  | -9.792726098 |
| O462 | 0.182130387   | -6.758269943  | -5.770793158 |
| O463 | 2.241080743   | -5.971045289  | -6.113075552 |
| O464 | -1.583590904  | 1.949576766   | -9.184590433 |
| O465 | 10.409646149  | -5.749624226  | -0.400250482 |
| O466 | 12.508141071  | -7.366062097  | 1.877412020  |
| O467 | -0.222441630  | -6.190009682  | -0.296931059 |
| O468 | -0.122603458  | -8.183792285  | 0.682986409  |
| O469 | 5.128040843   | -11.120162817 | -1.166709413 |
| O470 | 3.102271959   | -10.893608319 | -2.139207770 |
| O471 | 5.124120339   | -5.986048227  | 0.366965737  |
| O472 | 4.484515529   | -7.574414676  | 1.831212296  |
| O473 | 2.926316675   | -6.154658862  | -1.069079542 |
| O474 | 8.087540990   | -6.658141738  | 3.812759809  |
| O475 | 6.679613238   | -4.683472575  | 2.353065126  |
| O476 | -3.159050299  | 4.855347735   | -3.879131676 |
| O477 | 7.663385524   | -10.676012459 | 0.549616443  |
| O478 | 6.793395528   | -8.766015430  | 2.510398608  |
| S479 | 4.400106151   | 4.885104658   | -1.171100942 |
| S480 | 2.873768879   | 1.939840898   | -2.205519963 |
| S481 | 2.817540652   | -3.486094420  | -2.663933489 |
| S482 | 3.827655165   | 1.657902105   | 0.962222198  |
| S483 | 1.027035353   | -1.051041535  | -1.704295009 |
| S484 | 5.219664238   | -0.806550280  | -4.205788325 |
| S485 | 3.485588463   | -3.506079224  | 0.899011309  |
| S486 | 6.374435780   | 1.527730496   | -1.525696891 |

|                       |                           |              |               |              |
|-----------------------|---------------------------|--------------|---------------|--------------|
|                       | S487                      | 6.282350080  | -3.315009568  | -1.498562147 |
|                       | S488                      | 6.275211343  | -1.076894058  | 1.506417807  |
| <b>3(b)</b>           | bm1cnx2b6x2hn2n2x47.car_1 |              |               |              |
| Fe( 139) 0.558 2.451  | C1                        | -7.891859361 | -5.076657805  | -0.949239324 |
| Fe( 140) 0.333 0.167  | C2                        | -7.878459882 | -6.247778611  | -1.938979012 |
| Fe( 141) 0.570 2.773  | C3                        | -9.120042834 | -3.103186549  | -0.146136270 |
| Fe( 142) 0.545 -2.588 | C4                        | -9.064620664 | -3.342997882  | 1.361118843  |
| Fe( 143) 0.613 3.187  | C5                        | -9.528961831 | -4.842993874  | 3.230506659  |
| Fe( 144) 0.512 -2.330 | C6                        | -8.110209380 | -5.096302033  | 3.752660595  |
| Fe( 145) 0.193 -0.155 | C7                        | -5.831869052 | -5.806919113  | 3.196398377  |
| <b>S=2</b>            | C8                        | -5.065538736 | -4.482499826  | 3.267484111  |
|                       | C9                        | -4.662766977 | -2.283052448  | 2.293882060  |
|                       | C10                       | -5.065552781 | -1.429656881  | 3.504826934  |
|                       | C11                       | -6.812000323 | -0.724800739  | 5.037674351  |
|                       | C12                       | -6.355517861 | -1.294492016  | 6.388469005  |
|                       | C13                       | -6.307948878 | -3.256349495  | 7.856726092  |
|                       | C14                       | -4.884578988 | -3.724295959  | 8.182593128  |
|                       | C15                       | -2.790672708 | -4.678895982  | 7.316459738  |
|                       | C16                       | -1.609002146 | -3.780625888  | 6.936303917  |
|                       | C17                       | -0.942442344 | -1.682670790  | 5.786990958  |
|                       | C18                       | -1.029526468 | -0.328495930  | 6.513747205  |
|                       | C19                       | -1.034142988 | -1.573459864  | 4.242732286  |
|                       | C20                       | -0.112596549 | -0.485917827  | 3.681466322  |
|                       | C21                       | -0.733626668 | -2.928155377  | 3.589701985  |
|                       | C22                       | -2.397212781 | 1.644453545   | 7.066889274  |
|                       | C23                       | -2.698700461 | 1.467848698   | 8.568074998  |
|                       | C24                       | -3.467771723 | 2.496014369   | 6.342655431  |
|                       | C25                       | -3.749282383 | 3.792772632   | 7.111238062  |
|                       | C26                       | -3.031477755 | 2.812183619   | 4.906247104  |
|                       | C27                       | -4.055137766 | 0.446686712   | 10.298739177 |
|                       | C28                       | -2.861933823 | 0.097158518   | 11.166005037 |
|                       | C29                       | 4.044076714  | -11.241493177 | 6.109324296  |
|                       | C30                       | 4.828573431  | -10.060665383 | 5.533986727  |
|                       | C31                       | 5.180874028  | -7.599082511  | 5.796475656  |
|                       | C32                       | 6.121854839  | -7.200329302  | 6.949751838  |
|                       | C33                       | 4.093737451  | -6.537269462  | 5.554950117  |
|                       | C34                       | 4.651974001  | -5.155224393  | 5.204478338  |
|                       | C35                       | 3.552548646  | -4.233563648  | 4.675520523  |
|                       | C36                       | 3.594452726  | -1.734906720  | 4.527443859  |
|                       | C37                       | 8.378323034  | -6.444756529  | 7.536821934  |
|                       | C38                       | 8.690014084  | -4.963543701  | 7.531002695  |
|                       | C39                       | -4.731988157 | -2.486319427  | -2.771676158 |
|                       | C40                       | -5.198642861 | -1.037889495  | -2.566412687 |
|                       | C41                       | -3.249611215 | -2.578684050  | -2.345620955 |
|                       | C42                       | -2.711177167 | -4.011238626  | -2.144052051 |
|                       | C43                       | -2.099592866 | -4.657670995  | -3.384591594 |
|                       | C44                       | -5.458467813 | 1.120693295   | -3.731030399 |
|                       | C45                       | -6.887782199 | 1.594711415   | -3.438821242 |
|                       | C46                       | -4.947335068 | 1.737189159   | -5.048514478 |
|                       | C47                       | -9.094357009 | 0.950831961   | -2.582008494 |
|                       | C48                       | -9.048696394 | 1.088967429   | -1.051490681 |
|                       | C49                       | -7.725799131 | 0.785091206   | 0.998779803  |
|                       | C50                       | -6.744802688 | 1.851226530   | 1.495948188  |
|                       | C51                       | -4.866155671 | 3.360275422   | 1.020507731  |
|                       | C52                       | -5.542462287 | 4.664841618   | 1.467077632  |
|                       | C53                       | -3.932942966 | 3.745635538   | -0.142448494 |
|                       | C54                       | -3.152764163 | 2.606631845   | -0.710090157 |
|                       | C55                       | -2.863177122 | 1.336614120   | -0.251823929 |
|                       | C56                       | -1.877549702 | 1.502123101   | -2.153104559 |
|                       | C57                       | -7.229289250 | 6.323391084   | 0.801935025  |



|      |              |              |              |
|------|--------------|--------------|--------------|
| C58  | -7.720972556 | 6.571838381  | 2.226400735  |
| C59  | -8.414310435 | 6.360877107  | -0.191707793 |
| C60  | -8.890306975 | 7.719299359  | -0.615525548 |
| C61  | -9.078151956 | 8.881765504  | 0.107728081  |
| C62  | -9.616701057 | 9.200213439  | -2.018289421 |
| C63  | 7.449998574  | 1.344922675  | 6.204629228  |
| C64  | 8.324531503  | 0.119331314  | 6.393823850  |
| C65  | 6.142072244  | 0.865160874  | 5.524553751  |
| C66  | 5.142770002  | 1.979569673  | 5.318769032  |
| C67  | 4.194512856  | 2.298985955  | 6.308739675  |
| C68  | 5.136628984  | 2.734298549  | 4.132895340  |
| C69  | 3.267497343  | 3.329857062  | 6.122313418  |
| C70  | 4.225455978  | 3.772885427  | 3.936925864  |
| C71  | 3.291452932  | 4.070094177  | 4.933303994  |
| C72  | 6.007395973  | 6.951684333  | 0.047630729  |
| C73  | 5.095277241  | 7.994769772  | -0.610853862 |
| C74  | 5.209914741  | 5.668961284  | 0.318425268  |
| C75  | 4.593328687  | 9.253636518  | -2.660798392 |
| C76  | 3.224115887  | 8.760186321  | -3.130602779 |
| C77  | 1.729934816  | 6.819021331  | -3.437569781 |
| C78  | 0.779862595  | 6.743859037  | -2.221430949 |
| C79  | 1.986096682  | 5.452355035  | -4.097004877 |
| C80  | 0.774318248  | 4.675673703  | -4.621441487 |
| C81  | 0.034990478  | 5.267060836  | -5.834975609 |
| C82  | -1.361674875 | 7.333917277  | -5.877316102 |
| C83  | 0.484262322  | 6.328091891  | 0.160359637  |
| C84  | 0.211629590  | 7.696702638  | 0.812336047  |
| C85  | 1.049886776  | 5.389186614  | 1.237882589  |
| C86  | 1.219503233  | 9.811337368  | 1.514191529  |
| C87  | 0.692636295  | 11.150204356 | 1.007797166  |
| C88  | -0.345273406 | 12.417843638 | -0.825269988 |
| C89  | -1.771839015 | 12.870825087 | -0.446060137 |
| C90  | -0.170839898 | 12.378584270 | -2.358728148 |
| C91  | -1.060006218 | 11.324954920 | -3.009639275 |
| C92  | -3.950813422 | 12.208978163 | 0.467198266  |
| C93  | -4.113987586 | 13.298329686 | 1.518286093  |
| C94  | -4.638854004 | 10.904079195 | 0.953324600  |
| C95  | -4.632269234 | 9.830530581  | -0.109834010 |
| C96  | -5.613183403 | 9.821821510  | -1.114587280 |
| C97  | -3.616747787 | 8.860975969  | -0.164937500 |
| C98  | -5.569767110 | 8.894524751  | -2.158076947 |
| C99  | -3.545352958 | 7.937602563  | -1.212704308 |
| C100 | -4.522572673 | 7.973073695  | -2.206989743 |
| C101 | 6.321806997  | -4.248443819 | -7.475580455 |
| C102 | 4.825144195  | -4.012593693 | -7.356369351 |
| C103 | 3.088829104  | -2.455830825 | -6.494630659 |
| C104 | 2.749389916  | -1.142443858 | -7.209657665 |
| C105 | 3.056081643  | 1.286347862  | -7.175820101 |
| C106 | 4.172295076  | 2.313493093  | -7.015266834 |
| C107 | 6.292459416  | 2.971319219  | -5.979525597 |
| C108 | 7.518453318  | 2.747897604  | -6.842426688 |
| C109 | -0.180609909 | -3.874110855 | -9.378755793 |
| C110 | -1.243456395 | -2.768351162 | -9.401319020 |
| C111 | -0.091678192 | -4.471356478 | -7.955557895 |
| C112 | 0.650926299  | -5.820324774 | -7.955206699 |
| C113 | 0.987027252  | -6.237233085 | -6.540603482 |
| C114 | -1.816604651 | -0.449560747 | -8.891730289 |
| C115 | -1.202731748 | 0.826856035  | -9.432114523 |
| C116 | -2.556027699 | -0.295501150 | -7.540066348 |
| C117 | -1.572319613 | -0.256598336 | -6.406910400 |
| C118 | -0.920760615 | 0.938696272  | -6.064549656 |

|       |               |               |              |
|-------|---------------|---------------|--------------|
| C119  | -1.160519904  | -1.455439648  | -5.797691277 |
| C120  | 0.179837308   | 0.914364791   | -5.204498272 |
| C121  | -0.056143425  | -1.475175815  | -4.945300495 |
| C122  | 0.642731304   | -0.293179585  | -4.684781471 |
| C123  | 8.713814347   | -6.511258451  | -1.956189643 |
| C124  | 9.556732474   | -6.616836287  | -0.673876929 |
| C125  | 7.276557682   | -7.019844012  | -1.763234705 |
| C126  | 6.331104252   | -6.770371299  | -2.898577393 |
| C127  | 6.332027349   | -7.376413581  | -4.139710379 |
| C128  | 4.552270857   | -6.070735890  | -3.958922614 |
| C129  | 10.215203028  | -7.874084960  | 1.301849273  |
| C130  | 11.691794551  | -7.685994008  | 1.038413364  |
| C131  | 0.413106469   | -6.951810814  | 0.389538039  |
| C132  | 1.766963102   | -6.688725259  | 0.988995525  |
| C133  | 2.957292755   | -7.025113896  | 0.004142374  |
| C134  | 2.881387771   | -8.516122667  | -0.435230184 |
| C135  | 4.105038404   | -8.933854499  | -1.266592970 |
| C136  | 4.200279584   | -10.412591900 | -1.506074310 |
| C137  | 4.275205430   | -6.873823731  | 0.824654342  |
| C138  | 4.127060637   | -0.854432511  | -1.110411511 |
| Fe139 | 4.631043807   | -2.143111411  | -2.496781672 |
| Fe140 | 2.516241479   | 0.299464340   | -0.539822987 |
| Fe141 | 5.298715592   | 0.304424896   | 0.008615195  |
| Fe142 | 4.597968660   | 0.436051094   | -2.493581920 |
| Fe143 | 4.296433363   | 2.647268557   | -1.024136643 |
| Fe144 | 5.106302447   | -2.221653040  | 0.037050746  |
| Fe145 | 2.613768340   | -2.343250064  | -0.705247341 |
| H146  | -6.179784224  | -7.128100420  | -1.236967666 |
| H147  | -5.939397443  | -6.245074597  | -2.587351854 |
| H148  | -9.708494314  | -4.460323700  | -1.687856966 |
| H149  | -8.278680486  | -5.907628145  | -2.907169985 |
| H150  | -8.600928349  | -6.990976190  | -1.557846934 |
| H151  | -8.304601216  | -2.401243854  | -0.373629343 |
| H152  | -9.989086714  | -5.165692245  | 1.151826609  |
| H153  | -10.072971287 | -2.611976036  | -0.384787997 |
| H154  | -10.135742728 | -5.741769002  | 3.401597772  |
| H155  | -7.510107511  | -5.702164383  | 1.885037673  |
| H156  | -9.946102698  | -4.024593291  | 3.831910428  |
| H157  | -3.570538438  | -2.386681124  | 2.333193628  |
| H158  | -5.896324157  | -3.853791874  | 1.480592009  |
| H159  | -5.370736002  | -6.455585438  | 2.438623809  |
| H160  | -6.430892506  | 0.301493742   | 4.970619255  |
| H161  | -7.045277734  | -2.022558734  | 3.334880144  |
| H162  | -5.729350383  | -6.289336011  | 4.175912564  |
| H163  | -4.925001970  | -1.758145706  | 1.363884680  |
| H164  | -6.950040399  | -3.196448512  | 5.823417083  |
| H165  | -7.910091157  | -0.691808182  | 5.024503270  |
| H166  | -1.421223254  | -3.712466167  | 3.935785992  |
| H167  | -0.826505360  | -2.850993709  | 2.495757967  |
| H168  | 0.298251672   | -3.246414059  | 3.806764566  |
| H169  | -2.072891539  | -1.295695097  | 4.000198534  |
| H170  | -6.964981039  | -4.136372052  | 7.920956719  |
| H171  | -2.870275065  | 1.905872999   | 4.306208538  |
| H172  | -4.272527731  | 0.151286471   | 8.192159363  |
| H173  | -4.131775634  | 3.605395217   | 8.125138955  |
| H174  | -0.265218817  | -0.390966031  | 2.598174415  |
| H175  | 0.945608037   | -0.740215071  | 3.834261166  |
| H176  | 7.190493758   | 1.723895679   | 7.211912819  |
| H177  | -3.800091802  | 3.419027090   | 4.405411425  |
| H178  | -4.497618367  | 4.393655670   | 6.573359606  |
| H179  | -2.093694501  | 3.391191860   | 4.909873395  |

|      |              |              |               |
|------|--------------|--------------|---------------|
| H180 | -2.832901306 | 4.397325750  | 7.201460574   |
| H181 | -4.401258599 | 1.905792025  | 6.308273726   |
| H182 | -1.435378184 | 2.177932239  | 7.040326999   |
| H183 | -2.935102112 | 0.015229934  | 5.771027194   |
| H184 | -0.300627111 | 0.500555044  | 4.131912711   |
| H185 | 1.375210472  | 4.446746036  | 0.764347877   |
| H186 | 0.226147597  | 5.168084277  | 1.934786469   |
| H187 | 2.160968449  | 5.664157301  | 2.834015526   |
| H188 | 1.765944499  | 5.171996430  | 5.413716705   |
| H189 | 4.208735214  | 4.321243803  | 2.994192570   |
| H190 | 5.824347905  | 2.478628836  | 3.323686520   |
| H191 | 4.170656462  | 1.727977682  | 7.241209256   |
| H192 | -2.913780109 | -2.462153986 | 6.101542207   |
| H193 | -2.694824262 | -5.600961068 | 6.724434111   |
| H194 | -2.670211852 | -4.942455017 | 8.375477223   |
| H195 | -4.508042310 | -4.148424246 | 6.181473866   |
| H196 | -6.593459300 | -2.555560118 | 8.651800997   |
| H197 | 2.527263992  | 3.552774400  | 6.895303445   |
| H198 | 0.035786098  | -2.094604182 | 6.067142642   |
| H199 | -4.540279934 | 1.346873434  | 10.709656301  |
| H200 | -4.767352440 | -0.390502589 | 10.371618796  |
| H201 | -2.035943112 | -0.436974857 | 10.640879843  |
| H202 | 9.309135352  | -7.012501873 | 7.386730506   |
| H203 | -0.561145062 | -5.874684644 | -3.975950756  |
| H204 | 0.482571917  | -8.701807928 | 1.197253574   |
| H205 | 0.004250816  | -6.589388758 | -8.402188616  |
| H206 | 1.568720823  | -5.749547765 | -8.556555997  |
| H207 | -1.100345023 | -4.621041175 | -7.539903903  |
| H208 | -0.372347483 | 0.662464596  | -10.159039488 |
| H209 | -0.599618264 | -4.648916122 | -10.039318946 |
| H210 | -2.632728849 | -2.043093463 | -3.083907748  |
| H211 | -3.524246274 | -4.675466836 | -1.802032678  |
| H212 | 0.095142073  | -1.389904466 | -8.610678726  |
| H213 | -2.584931454 | -0.708102088 | -9.649911860  |
| H214 | 1.586962704  | -2.785992010 | -9.355536733  |
| H215 | -0.584397232 | -5.519962310 | -2.251400041  |
| H216 | 0.411428385  | -3.744300376 | -7.299783127  |
| H217 | 1.690534652  | -4.227247918 | -10.144337910 |
| H218 | -5.812518960 | -3.379258541 | -4.290724030  |
| H219 | -3.132166788 | -2.026625675 | -1.403298858  |
| H220 | 2.801144519  | -5.527976877 | -6.830479138  |
| H221 | -1.966515753 | -4.005339379 | -1.335939283  |
| H222 | -4.283104460 | 2.987208558  | 1.875369697   |
| H223 | -3.176919794 | 0.881632836  | 0.684996729   |
| H224 | -8.698145133 | 1.023209427  | 1.447779141   |
| H225 | -7.139307985 | 0.261918027  | -0.985400759  |
| H226 | -6.979441916 | 4.333101229  | 0.046198073   |
| H227 | -8.910020672 | 9.129649570  | 1.150125070   |
| H228 | -8.074856748 | 5.648842883  | 2.745717076   |
| H229 | -9.247220560 | 5.759564255  | 0.214785802   |
| H230 | -6.493246516 | 7.102118702  | 0.545264603   |
| H231 | -9.953895246 | 9.716155058  | -2.914031805  |
| H232 | -3.256898274 | 4.530126163  | 0.238175211   |
| H233 | -4.538516210 | 4.220606450  | -0.934604679  |
| H234 | -9.764583063 | 10.781398760 | -0.599924079  |
| H235 | -8.089332577 | 5.850233356  | -1.111787601  |
| H236 | -5.647828213 | 1.835838041  | -0.255925154  |
| H237 | -7.409965787 | -0.184636363 | 1.412177432   |
| H238 | -9.475624929 | 1.900635413  | -2.978112217  |
| H239 | -1.275400471 | 1.310511490  | -3.037893998  |
| H240 | -9.817850587 | 0.164282471  | -2.835508520  |

|      |              |              |              |
|------|--------------|--------------|--------------|
| H241 | 8.868776560  | 2.795164571  | 5.910574512  |
| H242 | 7.498214861  | 3.034878443  | 5.052063597  |
| H243 | 2.295477609  | 6.013131895  | -0.988182465 |
| H244 | -0.495724538 | 5.935848064  | -0.148140428 |
| H245 | 2.042828543  | 8.385811785  | 0.192024300  |
| H246 | -2.565007401 | 3.503177876  | -2.577394757 |
| H247 | -3.790725341 | 4.233975712  | -4.342081961 |
| H248 | -3.693541542 | 5.548367954  | -3.465943524 |
| H249 | -3.897640032 | 1.448203507  | -5.198399722 |
| H250 | -5.544387558 | 1.358418176  | -5.896409465 |
| H251 | 0.892065945  | 12.211395330 | -2.586436054 |
| H252 | -0.465861896 | 13.360441875 | -2.751063419 |
| H253 | 0.566786615  | 10.008681187 | -3.296135604 |
| H254 | -1.028179301 | 9.391173979  | -3.669844827 |
| H255 | -0.832457958 | 8.874603445  | -7.119082257 |
| H256 | -0.336413836 | 4.451030122  | -6.473969247 |
| H257 | -6.346620836 | 8.891747412  | -2.926413346 |
| H258 | -2.857267515 | 8.806198917  | 0.619912324  |
| H259 | -2.901427193 | 7.644152840  | -4.543913663 |
| H260 | 2.504914029  | 4.802882427  | -3.373910384 |
| H261 | 3.716504901  | 6.818352563  | -2.647263896 |
| H262 | 0.056934627  | 4.466883862  | -3.812798630 |
| H263 | -7.532929255 | -0.324678644 | -3.316035467 |
| H264 | 5.163829565  | 9.562017357  | -3.546887073 |
| H265 | -5.068159641 | -0.880453095 | -4.554738535 |
| H266 | 2.689231180  | 5.621874883  | -4.929589982 |
| H267 | -2.717765791 | 7.228348321  | -1.270626911 |
| H268 | -5.843780502 | 3.379929050  | -4.508906110 |
| H269 | 4.409820185  | 10.146459435 | -2.047682713 |
| H270 | -0.117081541 | 7.351456243  | -7.514597029 |
| H271 | -2.761761642 | 8.818725725  | -5.797856624 |
| H272 | -4.155365074 | -3.533758945 | -4.445477389 |
| H273 | -5.324981969 | -3.088382079 | -2.057214295 |
| H274 | -6.426647534 | 10.550384213 | -1.089420392 |
| H275 | -4.855822514 | 1.543512530  | -2.908091182 |
| H276 | 1.234631240  | 7.496941672  | -4.145416004 |
| H277 | 0.733632152  | 5.855739095  | -6.443944396 |
| H278 | 1.168404717  | 3.701053235  | -4.936117701 |
| H279 | -1.818303714 | 5.658560909  | -4.832062838 |
| H280 | 0.652261028  | 9.578603458  | 2.427799842  |
| H281 | 0.094301619  | 10.302962460 | -0.761547755 |
| H282 | 0.313137114  | 13.203870047 | -0.427314346 |
| H283 | 2.268321590  | 9.975673848  | 1.799249317  |
| H284 | -2.168597882 | 11.023338979 | 0.321937860  |
| H285 | 6.849647968  | -3.284163744 | -7.512435658 |
| H286 | 6.625218497  | -4.743914515 | -6.530086847 |
| H287 | 8.683244947  | -5.437599633 | -2.193212777 |
| H288 | 7.575222234  | -5.385019467 | -8.612980614 |
| H289 | 6.005386141  | -5.841360463 | -8.699285663 |
| H290 | 5.889574398  | 4.913057941  | 0.727139364  |
| H291 | 5.811069695  | 7.763356984  | 1.909284245  |
| H292 | 6.131309936  | 7.794393038  | -2.375249581 |
| H293 | 4.421791684  | 5.877431939  | 1.055406851  |
| H294 | 7.147447188  | 8.278216358  | 1.124265653  |
| H295 | 6.583060247  | 2.946421329  | -4.917827002 |
| H296 | 6.843146015  | 6.718020172  | -0.632736874 |
| H297 | 3.448747651  | -6.477877599 | 6.447841676  |
| H298 | 5.756328602  | -7.741217537 | 4.874109663  |
| H299 | 5.261406655  | 1.138307953  | -5.679516173 |
| H300 | 3.653506296  | 0.247094310  | 4.013344166  |
| H301 | 2.853881818  | 1.190050334  | -8.250205628 |

|      |              |               |              |
|------|--------------|---------------|--------------|
| H302 | 0.260095948  | -2.407457894  | -4.470393653 |
| H303 | 2.153678681  | 1.737611229   | -6.729175774 |
| H304 | 2.780225222  | -4.059010624  | 5.436080779  |
| H305 | 3.734842441  | -0.175119235  | -5.711382586 |
| H306 | 3.051930471  | -4.711722048  | 3.816695310  |
| H307 | 3.472201297  | -6.905668798  | 4.722588004  |
| H308 | 5.422894069  | -5.245870371  | 4.424625739  |
| H309 | 5.125871477  | -4.689948193  | 6.084138425  |
| H310 | -3.245860394 | -1.145756004  | -7.432821428 |
| H311 | 3.939199949  | -8.943235296  | 6.934769463  |
| H312 | 3.268382893  | -11.479877075 | 5.365717178  |
| H313 | 1.518856518  | -0.293834722  | -4.039928557 |
| H314 | 4.024991206  | -11.176379096 | 8.168175560  |
| H315 | 2.565986036  | -11.526805602 | 7.511393645  |
| H316 | 4.585270537  | -2.987057025  | 3.314582792  |
| H317 | 0.690440606  | 1.834431796   | -4.920998831 |
| H318 | -1.699823292 | -2.382459884  | -6.003660716 |
| H319 | 7.336983382  | -10.067681640 | 1.254728395  |
| H320 | 7.308345645  | -8.109674757  | -1.585297481 |
| H321 | 5.982574050  | -8.268040903  | 2.193653598  |
| H322 | 6.882035457  | -10.828559646 | -0.011571939 |
| H323 | 7.365252286  | 2.065938469   | -7.713949974 |
| H324 | 6.170802143  | -5.172986485  | 1.644165080  |
| H325 | 1.905578545  | -7.249796080  | 1.925025116  |
| H326 | 5.180610446  | -2.279146818  | -6.319193906 |
| H327 | 2.821363329  | -9.147019095  | 0.465726066  |
| H328 | 4.894097164  | -7.195805289  | -5.717095251 |
| H329 | 3.617719515  | -5.585872538  | -4.212941058 |
| H330 | 4.736784602  | -12.099977652 | 6.129610359  |
| H331 | 4.346514917  | -0.822502041  | 2.832044969  |
| H332 | 7.707506809  | -5.898889882  | 3.326820218  |
| H333 | 6.831689092  | -3.805536071  | 1.979401049  |
| H334 | 7.613958030  | -6.790739021  | 5.553866400  |
| H335 | 3.000269985  | -2.223693363  | 6.433949858  |
| H336 | 3.267862107  | -11.875436175 | -2.261777067 |
| H337 | 4.065477079  | -8.418293440  | -2.238037798 |
| H338 | 5.036104631  | -8.637085842  | -0.770356369 |
| H339 | 1.968465362  | -8.665763776  | -1.029972305 |
| H340 | 2.963806807  | -2.356800847  | -5.405430985 |
| H341 | -1.253286596 | 1.878699656   | -6.512580669 |
| H342 | -3.153438434 | 0.626727920   | -7.599181358 |
| H343 | 1.841689607  | -5.612448360  | 1.192173666  |
| H344 | 7.704340474  | -7.454791726  | 3.331839337  |
| H345 | 6.414013906  | -9.307438387  | 3.266343410  |
| H346 | 2.534554832  | -0.645970427  | 5.919821782  |
| H347 | 7.019885310  | -8.083532056  | -4.588315032 |
| H348 | 6.854728938  | -6.563078046  | -0.859707273 |
| H349 | 2.419631880  | -3.232300353  | -6.869179389 |
| H350 | 5.907759505  | 3.980500931   | -6.200371141 |
| H351 | 5.704315697  | 0.082714604   | 6.163428118  |
| H352 | 6.399465433  | 0.407071750   | 4.555846029  |
| H353 | 10.312526002 | -6.780364910  | -3.214366887 |
| H354 | 9.551524551  | -8.176744660  | -2.829651349 |
| H355 | 10.080782995 | -8.903062529  | 1.671219265  |
| H356 | 8.708999182  | -8.440386902  | -0.095593656 |
| H357 | 12.018268614 | -7.927071266  | -0.001437585 |
| H358 | 9.885855717  | -7.189333973  | 2.099548151  |
| H359 | 8.936849879  | -0.151299549  | 5.499993944  |
| H360 | -3.216235509 | 13.486912722  | 2.152911807  |
| H361 | 7.985674824  | -6.684886181  | 8.540215202  |
| H362 | 7.858081251  | -4.306981535  | 7.178917450  |

|       |              |               |              |
|-------|--------------|---------------|--------------|
| H363  | -4.454506491 | 12.556701473  | -0.449907637 |
| H364  | -4.133812787 | 10.548553438  | 1.865127936  |
| H365  | -5.670065002 | 11.167329359  | 1.230383685  |
| H366  | 1.398691694  | -3.123503525  | -0.268254961 |
| H367  | -5.216900413 | 7.129109240   | -3.818756158 |
| H368  | 2.376014181  | -1.118635985  | 0.449154044  |
| H369  | 0.040396561  | -1.027278807  | -0.709034294 |
| Mo370 | 4.250402702  | -4.527272960  | -1.114200053 |
| N371  | -6.593780810 | -6.894279101  | -2.143442898 |
| N372  | -9.017040192 | -4.307330922  | -0.957773974 |
| N373  | -9.580826394 | -4.512552635  | 1.815984547  |
| N374  | -7.239858646 | -5.643531378  | 2.866345088  |
| N375  | -5.304275991 | -3.592074705  | 2.270744137  |
| N376  | -6.364825090 | -1.498639395  | 3.890470336  |
| N377  | -6.518877127 | -2.632492485  | 6.560253639  |
| N378  | -4.116157832 | -4.116189581  | 7.127790780  |
| N379  | -1.931035259 | -2.617102033  | 6.316116129  |
| N380  | -2.205774229 | 0.354391917   | 6.400798194  |
| N381  | -3.687505403 | 0.599223928   | 8.901682024  |
| N382  | 3.397962957  | -10.946813713 | 7.393843059  |
| N383  | 4.563669468  | -8.879243953  | 6.123519214  |
| N384  | 4.082063609  | -2.946047947  | 4.206980982  |
| N385  | 2.890101577  | -1.564330268  | 5.670574791  |
| N386  | 3.768597116  | -0.710023132  | 3.688041894  |
| N387  | 7.367982551  | -6.823838694  | 6.567524761  |
| N388  | -4.921731571 | -2.892445492  | -4.170476682 |
| N389  | -0.999275156 | -5.406961099  | -3.178095348 |
| N390  | -5.286916606 | -0.319103254  | -3.716916593 |
| N391  | -7.819128789 | 0.645322331   | -3.203765549 |
| N392  | -7.904320789 | 0.678520998   | -0.438441450 |
| N393  | -5.851644804 | 2.365155270   | 0.592347993  |
| N394  | -2.511111609 | 2.697612795   | -1.934734153 |
| N395  | -2.077202081 | 0.656717609   | -1.152458243 |
| N396  | -6.629664853 | 5.004012066   | 0.726003661  |
| N397  | -9.231323004 | 7.932442087   | -1.942186412 |
| N398  | -9.538821819 | 9.811067380   | -0.802262177 |
| N399  | 8.154782527  | 2.312061776   | 5.359839294  |
| N400  | 6.581309126  | 7.444691258   | 1.311755530  |
| N401  | 5.386685981  | 8.304658526   | -1.907268777 |
| N402  | 3.016459714  | 7.426853130   | -3.101557547 |
| N403  | -1.112840941 | 6.098209618   | -5.458024346 |
| N404  | -0.627489394 | 7.918746180   | -6.846651607 |
| N405  | -2.318036323 | 8.074631163   | -5.265496919 |
| N406  | 1.331523339  | 6.403576799   | -1.026233923 |
| N407  | 1.152434616  | 8.669725558   | 0.612685257  |
| N408  | 0.068488052  | 11.159884811  | -0.206938229 |
| N409  | -0.450941400 | 10.148804765  | -3.306365396 |
| N410  | -2.545801273 | 11.958466473  | 0.187841035  |
| N411  | 6.621644136  | -5.023143273  | -8.684099899 |
| N412  | 4.462709869  | -2.855657748  | -6.771936853 |
| N413  | 3.273944258  | -0.041503747  | -6.635658624 |
| N414  | 5.238407371  | 2.005449198   | -6.231571970 |
| N415  | 1.079712006  | -3.423652218  | -9.982476638 |
| N416  | -0.859372192 | -1.539261637  | -8.954768226 |
| N417  | 9.386200774  | -7.195869702  | -3.078203416 |
| N418  | 5.206212904  | -5.951877943  | -2.807051543 |
| N419  | 5.206582612  | -6.920400234  | -4.790658762 |
| N420  | 9.423325747  | -7.736952220  | 0.089618779  |
| N421  | 0.332632686  | 1.715613095   | 0.840602124  |
| N422  | 1.146450116  | 1.156550527   | 0.288837023  |
| O423  | -6.962848403 | -4.870302690  | -0.146618104 |

|      |               |               |              |
|------|---------------|---------------|--------------|
| O424 | -8.578796103  | -2.487822709  | 2.117901544  |
| O425 | -7.807781672  | -4.837222325  | 4.928618585  |
| O426 | -4.280233309  | -4.236907653  | 4.197100087  |
| O427 | -4.240530520  | -0.708327702  | 4.088085715  |
| O428 | -5.910455365  | -0.551744241  | 7.280260401  |
| O429 | -4.510731528  | -3.773884017  | 9.362198307  |
| O430 | -0.452315440  | -4.151436465  | 7.183343933  |
| O431 | -0.069915661  | 0.102514849   | 7.171643332  |
| O432 | -2.070815762  | 2.098354585   | 9.435474797  |
| O433 | -2.820814638  | 0.313409097   | 12.368506799 |
| O434 | 5.610657995   | -10.243835853 | 4.576843561  |
| O435 | 5.731561556   | -7.238511096  | 8.129977799  |
| O436 | 9.756846623   | -4.499136913  | 7.899530260  |
| O437 | -5.475993276  | -0.570645374  | -1.442462852 |
| O438 | -2.600205173  | -4.518863862  | -4.524669900 |
| O439 | -7.127490983  | 2.819582001   | -3.378020206 |
| O440 | -5.009760757  | 3.170947099   | -5.006739336 |
| O441 | -10.037532905 | 1.541983838   | -0.458101230 |
| O442 | -6.795534696  | 2.234362415   | 2.668465860  |
| O443 | -5.065176168  | 5.396547860   | 2.340624200  |
| O444 | -7.782368992  | 7.669483404   | 2.755373787  |
| O445 | 8.360072506   | -0.548109451  | 7.417838726  |
| O446 | 2.404464145   | 5.099530643   | 4.680724913  |
| O447 | 4.151297994   | 8.531406891   | -0.002825641 |
| O448 | 2.393145388   | 9.596677211   | -3.541690946 |
| O449 | -0.427072119  | 7.008758927   | -2.364901606 |
| O450 | -0.794149493  | 7.862876664   | 1.515892651  |
| O451 | 2.133985355   | 6.024013864   | 1.924293755  |
| O452 | 0.818821926   | 12.164579904  | 1.706373114  |
| O453 | -2.158009968  | 14.020717208  | -0.702823835 |
| O454 | -2.273010422  | 11.521016190  | -3.189485402 |
| O455 | -5.162960435  | 13.899177289  | 1.691223471  |
| O456 | -4.408153467  | 7.071060632   | -3.274426181 |
| O457 | 4.010702422   | -4.881820312  | -7.761299114 |
| O458 | 2.064519813   | -1.120599301  | -8.256775876 |
| O459 | 4.045347731   | 3.406412200   | -7.593389080 |
| O460 | 8.599248661   | 3.270741640   | -6.622100273 |
| O461 | -2.404284995  | -3.003310424  | -9.778720470 |
| O462 | 0.178606483   | -6.753603849  | -5.775529359 |
| O463 | 2.237741704   | -5.966160659  | -6.117720856 |
| O464 | -1.591859386  | 1.954759331   | -9.163283975 |
| O465 | 10.404984434  | -5.752273370  | -0.384746242 |
| O466 | 12.499053882  | -7.375086160  | 1.903795564  |
| O467 | -0.231309530  | -6.173985675  | -0.297478260 |
| O468 | -0.129503640  | -8.190888855  | 0.634085501  |
| O469 | 5.139447118   | -11.135268045 | -1.179132597 |
| O470 | 3.112725426   | -10.913302602 | -2.151409928 |
| O471 | 5.125050310   | -6.017717620  | 0.360382739  |
| O472 | 4.473654911   | -7.601035931  | 1.826877583  |
| O473 | 2.932280164   | -6.176238478  | -1.078190016 |
| O474 | 8.087069527   | -6.673694288  | 3.813268321  |
| O475 | 6.686291452   | -4.701500535  | 2.345497316  |
| O476 | -3.151724799  | 4.842276603   | -3.883368376 |
| O477 | 7.669196066   | -10.684050383 | 0.553406232  |
| O478 | 6.784624146   | -8.778635117  | 2.514015389  |
| S479 | 4.414516216   | 4.988988420   | -1.200681062 |
| S480 | 2.773523991   | 1.760299949   | -2.406365717 |
| S481 | 2.811939081   | -3.495261578  | -2.650803923 |
| S482 | 3.797845769   | 1.666263354   | 1.015003587  |
| S483 | 1.036180345   | -1.065051446  | -1.637715845 |
| S484 | 5.267559995   | -0.847938453  | -4.208464683 |

|                       |                        |              |               |              |
|-----------------------|------------------------|--------------|---------------|--------------|
|                       | S485                   | 3.508270323  | -3.528899555  | 0.914803342  |
|                       | S486                   | 6.260174665  | 1.625700797   | -1.589072582 |
|                       | S487                   | 6.282060018  | -3.337436607  | -1.500118218 |
|                       | S488                   | 6.259173104  | -1.063987635  | 1.500093557  |
| <b>4u(a)</b>          | bm2cnx2b262n2x35.car_4 |              |               |              |
| Fe( 139) 0.564 -2.477 | C1                     | -8.257765531 | -4.501987211  | -0.020558279 |
| Fe( 140) 0.346 0.276  | C2                     | -8.432040583 | -5.695973584  | -0.965671997 |
| Fe( 141) 0.543 -2.654 | C3                     | -9.269452140 | -2.440548310  | 0.856141009  |
| Fe( 142) 0.568 2.727  | C4                     | -9.079991093 | -2.659857428  | 2.355603080  |
| Fe( 143) 0.592 3.099  | C5                     | -9.467427758 | -4.089825328  | 4.295923139  |
| Fe( 144) 0.514 2.334  | C6                     | -8.022099772 | -4.423690632  | 4.680022456  |
| Fe( 145) 0.394 -0.847 | C7                     | -5.872376577 | -5.332835660  | 3.935719614  |
| <b>S=3/2</b>          | C8                     | -5.000402676 | -4.075871146  | 3.888593939  |
|                       | C9                     | -4.549142609 | -1.927597363  | 2.830081063  |
|                       | C10                    | -4.761816105 | -1.006820303  | 4.041195874  |
|                       | C11                    | -6.286164865 | -0.157724290  | 5.734253602  |
|                       | C12                    | -5.739778776 | -0.734107950  | 7.047609355  |
|                       | C13                    | -5.661993763 | -2.671796396  | 8.545069819  |
|                       | C14                    | -4.245394614 | -3.228689701  | 8.730072249  |
|                       | C15                    | -2.321712924 | -4.340448847  | 7.676826908  |
|                       | C16                    | -1.132223170 | -3.533974422  | 7.144927505  |
|                       | C17                    | -0.453418507 | -1.519128749  | 5.861386893  |
|                       | C18                    | -0.370084774 | -0.150852328  | 6.563893530  |
|                       | C19                    | -0.691159451 | -1.429739682  | 4.330921807  |
|                       | C20                    | 0.239340161  | -0.408816757  | 3.668378014  |
|                       | C21                    | -0.538508875 | -2.812264894  | 3.687421145  |
|                       | C22                    | -1.528389660 | 1.924492819   | 7.213044483  |
|                       | C23                    | -1.681038656 | 1.791497574   | 8.740908181  |
|                       | C24                    | -2.602216770 | 2.845399578   | 6.584798512  |
|                       | C25                    | -2.715014191 | 4.166193257   | 7.355806223  |
|                       | C26                    | -2.284990130 | 3.115449285   | 5.108400475  |
|                       | C27                    | -2.919087571 | 0.894237875   | 10.623386510 |
|                       | C28                    | -1.678501470 | 0.460483196   | 11.379862604 |
|                       | C29                    | 3.878336469  | -11.391934333 | 5.921176568  |
|                       | C30                    | 4.659898415  | -10.272833181 | 5.235918090  |
|                       | C31                    | 5.236508733  | -7.853263460  | 5.438627346  |
|                       | C32                    | 6.333232764  | -7.517809531  | 6.466999329  |
|                       | C33                    | 4.207411301  | -6.717883523  | 5.310935650  |
|                       | C34                    | 4.817037071  | -5.398990501  | 4.832494554  |
|                       | C35                    | 3.736037840  | -4.402556680  | 4.418614921  |
|                       | C36                    | 3.955468920  | -1.924451696  | 4.147905259  |
|                       | C37                    | 8.683322868  | -6.900935838  | 6.769329583  |
|                       | C38                    | 9.084787786  | -5.442189545  | 6.736212132  |
|                       | C39                    | -5.132660857 | -2.179231902  | -2.205031773 |
|                       | C40                    | -5.427339432 | -0.682549950  | -2.016251117 |
|                       | C41                    | -3.632814032 | -2.406820480  | -1.917950827 |
|                       | C42                    | -3.186434440 | -3.871276147  | -1.747360946 |
|                       | C43                    | -2.778941016 | -4.587072861  | -3.032256852 |
|                       | C44                    | -5.733954519 | 1.432321362   | -3.223672769 |
|                       | C45                    | -7.085058502 | 2.003542247   | -2.769833975 |
|                       | C46                    | -5.337244443 | 2.000391395   | -4.600628519 |
|                       | C47                    | -9.215753323 | 1.533033853   | -1.656172884 |
|                       | C48                    | -8.994848652 | 1.698489978   | -0.144053486 |
|                       | C49                    | -7.482031100 | 1.319521810   | 1.761791751  |
|                       | C50                    | -6.365202791 | 2.310176437   | 2.096141376  |
|                       | C51                    | -4.463076794 | 3.659859136   | 1.351739541  |
|                       | C52                    | -4.973948225 | 5.047213994   | 1.824826024  |
|                       | C53                    | -3.607493706 | 3.938559645   | 0.104904805  |
|                       | C54                    | -2.895398854 | 2.785564746   | -0.535243069 |
|                       | C55                    | -2.461862422 | 1.557211077   | -0.100200825 |



|      |              |              |              |
|------|--------------|--------------|--------------|
| C56  | -1.767253030 | 1.801286683  | -2.193150950 |
| C57  | -6.640926606 | 6.818051646  | 1.377763930  |
| C58  | -6.936909377 | 7.114506234  | 2.845993714  |
| C59  | -7.927575584 | 6.926756768  | 0.525749727  |
| C60  | -8.351046660 | 8.312634191  | 0.132387250  |
| C61  | -8.392904624 | 9.487832362  | 0.858259068  |
| C62  | -9.117135600 | 9.829216396  | -1.208731318 |
| C63  | 8.140413740  | 0.902944833  | 5.373405846  |
| C64  | 8.946489035  | -0.376695660 | 5.491765986  |
| C65  | 6.747435893  | 0.502074102  | 4.819339674  |
| C66  | 5.805658982  | 1.676532563  | 4.699413449  |
| C67  | 4.986979751  | 2.068823327  | 5.774336818  |
| C68  | 5.736323093  | 2.425358838  | 3.511238641  |
| C69  | 4.124849976  | 3.165696006  | 5.668509843  |
| C70  | 4.889189423  | 3.528346705  | 3.393161947  |
| C71  | 4.081792464  | 3.895133951  | 4.473183766  |
| C72  | 6.423971525  | 6.510757929  | -0.699730488 |
| C73  | 5.519757102  | 7.591564253  | -1.305135125 |
| C74  | 5.583861733  | 5.284883512  | -0.323851405 |
| C75  | 4.917406915  | 8.846146440  | -3.332229328 |
| C76  | 3.472254758  | 8.450588268  | -3.641903198 |
| C77  | 1.819208320  | 6.615185045  | -3.731522702 |
| C78  | 0.982837300  | 6.609199357  | -2.433463544 |
| C79  | 1.917688413  | 5.226888002  | -4.391092975 |
| C80  | 0.605932958  | 4.514769645  | -4.738457384 |
| C81  | -0.228240755 | 5.103465762  | -5.889272211 |
| C82  | -1.451664629 | 7.278902509  | -5.868298587 |
| C83  | 0.899956928  | 6.301603848  | -0.014508471 |
| C84  | 0.820949202  | 7.700700615  | 0.631235830  |
| C85  | 1.474105794  | 5.322182508  | 1.018054076  |
| C86  | 2.059775046  | 9.747324522  | 1.146091910  |
| C87  | 1.572244055  | 11.106329706 | 0.653470201  |
| C88  | 0.430597740  | 12.398072787 | -1.101038420 |
| C89  | -0.919815829 | 12.956426826 | -0.601436421 |
| C90  | 0.458684863  | 12.312346804 | -2.642563282 |
| C91  | -0.566043425 | 11.319301704 | -3.177100474 |
| C92  | -3.029989719 | 12.454756096 | 0.558001166  |
| C93  | -3.006392493 | 13.573773156 | 1.592862893  |
| C94  | -3.729680967 | 11.199002325 | 1.147118933  |
| C95  | -3.913617590 | 10.113489189 | 0.111103916  |
| C96  | -5.023924170 | 10.131096956 | -0.746913239 |
| C97  | -2.960195473 | 9.096831587  | -0.059114394 |
| C98  | -5.170238760 | 9.181179173  | -1.760398134 |
| C99  | -3.076081801 | 8.153098320  | -1.084346120 |
| C100 | -4.181735591 | 8.212173504  | -1.929411446 |
| C101 | 5.183498285  | -4.842409916 | -7.983496733 |
| C102 | 3.732388018  | -4.480386698 | -7.712350409 |
| C103 | 2.232486242  | -2.783574131 | -6.689784611 |
| C104 | 1.898455380  | -1.470893246 | -7.409689733 |
| C105 | 2.372888113  | 0.933406904  | -7.507540230 |
| C106 | 3.575437378  | 1.874494605  | -7.489341862 |
| C107 | 5.845487602  | 2.375395470  | -6.707249710 |
| C108 | 6.927633531  | 2.115792895  | -7.737085020 |
| C109 | -1.412957058 | -4.039424311 | -9.204926587 |
| C110 | -2.391817316 | -2.860432684 | -9.148796456 |
| C111 | -1.228343244 | -4.618916586 | -7.784439752 |
| C112 | -0.598409261 | -6.023276542 | -7.827709797 |
| C113 | -0.138396944 | -6.433699745 | -6.447397575 |
| C114 | -2.725174702 | -0.485826939 | -8.668042129 |
| C115 | -2.077551799 | 0.731142518  | -9.297814285 |
| C116 | -3.263235832 | -0.264256059 | -7.232412748 |

|       |               |               |              |
|-------|---------------|---------------|--------------|
| C117  | -2.168330605  | -0.308749497  | -6.197328167 |
| C118  | -1.376778777  | 0.819931956   | -5.926771450 |
| C119  | -1.855705603  | -1.518040322  | -5.550464549 |
| C120  | -0.277821539  | 0.722968349   | -5.064945152 |
| C121  | -0.760041212  | -1.611477825  | -4.686430763 |
| C122  | 0.041576924   | -0.491122433  | -4.446119681 |
| C123  | 7.957704430   | -7.146712045  | -2.665732442 |
| C124  | 8.930631360   | -7.296970518  | -1.483938339 |
| C125  | 6.511079439   | -7.511142136  | -2.295029380 |
| C126  | 5.472420780   | -7.213919079  | -3.335777453 |
| C127  | 5.314549691   | -7.833839540  | -4.559610340 |
| C128  | 3.632426478   | -6.434089336  | -4.221559156 |
| C129  | 9.727293192   | -8.573975126  | 0.427119350  |
| C130  | 11.173224949  | -8.520159551  | -0.015734733 |
| C131  | -0.057184279  | -6.930965004  | 0.553023264  |
| C132  | 1.370480054   | -6.755969612  | 0.998176733  |
| C133  | 2.411028346   | -7.151326595  | -0.124268455 |
| C134  | 2.195334769   | -8.639255844  | -0.522500357 |
| C135  | 3.281196168   | -9.167966196  | -1.475861840 |
| C136  | 3.261146787   | -10.661469430 | -1.642137176 |
| C137  | 3.822933105   | -7.058462834  | 0.527186898  |
| C138  | 3.944921407   | -1.162344964  | -1.520165370 |
| Fe139 | 4.201468090   | -2.509524142  | -2.947080726 |
| Fe140 | 2.710427283   | 0.289724892   | -0.840700663 |
| Fe141 | 5.383307072   | -0.066353519  | -0.531284750 |
| Fe142 | 4.399114038   | 0.079579007   | -2.956277839 |
| Fe143 | 4.557696364   | 2.305228882   | -1.461222295 |
| Fe144 | 4.845251142   | -2.556294505  | -0.424770046 |
| Fe145 | 2.341579536   | -2.281320821  | -1.048474068 |
| H146  | -6.762375450  | -6.719946820  | -0.398889962 |
| H147  | -6.566960307  | -5.872423367  | -1.780011302 |
| H148  | -10.107405472 | -3.790366372  | -0.573733458 |
| H149  | -8.890736098  | -5.346022145  | -1.904283949 |
| H150  | -9.177494478  | -6.361867548  | -0.496723959 |
| H151  | -8.436814604  | -1.800991793  | 0.530220699  |
| H152  | -10.155389485 | -4.409045731  | 2.280373477  |
| H153  | -10.207534509 | -1.890719297  | 0.702490715  |
| H154  | -10.104251375 | -4.950209033  | 4.541709648  |
| H155  | -7.667406502  | -5.154670110  | 2.795167154  |
| H156  | -9.776772126  | -3.240685156  | 4.919591702  |
| H157  | -3.469871324  | -2.120610417  | 2.769624810  |
| H158  | -5.995669663  | -3.398248168  | 2.206256603  |
| H159  | -5.539810970  | -6.034278935  | 3.159143440  |
| H160  | -5.842317550  | 0.837455299   | 5.604503262  |
| H161  | -6.774720297  | -1.488571927  | 4.115075890  |
| H162  | -5.712688557  | -5.798902207  | 4.915544954  |
| H163  | -4.855786293  | -1.406077594  | 1.911849066  |
| H164  | -6.515017520  | -2.600041292  | 6.590655602  |
| H165  | -7.375305115  | -0.046374822  | 5.825434313  |
| H166  | -1.230881649  | -3.544564988  | 4.126216172  |
| H167  | -0.740600197  | -2.760101994  | 2.606633813  |
| H168  | 0.488382047   | -3.190950063  | 3.810567678  |
| H169  | -1.729204871  | -1.090117904  | 4.183079338  |
| H170  | -6.364836394  | -3.503636971  | 8.700416168  |
| H171  | -2.255785671  | 2.191764167   | 4.513497807  |
| H172  | -3.370210140  | 0.580984003   | 8.559893785  |
| H173  | -3.008157874  | 4.014640656   | 8.405050296  |
| H174  | -0.005520210  | -0.310062762  | 2.601137124  |
| H175  | 1.290199412   | -0.724030787  | 3.729478688  |
| H176  | 7.999211101   | 1.309697019   | 6.392765467  |
| H177  | -3.048673943  | 3.775406954   | 4.670739108  |

|      |              |              |               |
|------|--------------|--------------|---------------|
| H178 | -3.469423846 | 4.810926712  | 6.881473396   |
| H179 | -1.308737901 | 3.618267766  | 5.011411045   |
| H180 | -1.753348301 | 4.703630683  | 7.348357329   |
| H181 | -3.575253442 | 2.324391591  | 6.647071939   |
| H182 | -0.539605440 | 2.386968048  | 7.074758609   |
| H183 | -2.315875771 | 0.319166578  | 6.015843971   |
| H184 | 0.151142695  | 0.591653553  | 4.118307577   |
| H185 | 1.641851044  | 4.346391259  | 0.529905147   |
| H186 | 0.714645040  | 5.194744547  | 1.805072912   |
| H187 | 2.784045736  | 5.497983790  | 2.475266213   |
| H188 | 2.691712833  | 5.101058009  | 5.091173822   |
| H189 | 4.826161900  | 4.082885674  | 2.456071107   |
| H190 | 6.331562641  | 2.122980499  | 2.647062560   |
| H191 | 5.015978411  | 1.507550584  | 6.712144749   |
| H192 | -2.429619393 | -2.154917862 | 6.396996230   |
| H193 | -2.346167712 | -5.281170789 | 7.106988461   |
| H194 | -2.108406902 | -4.586321345 | 8.725405924   |
| H195 | -4.119165381 | -3.730123622 | 6.716277169   |
| H196 | -5.813670728 | -1.941248804 | 9.350036549   |
| H197 | 3.487384546  | 3.451267401  | 6.510385760   |
| H198 | 0.520031668  | -1.991672113 | 6.047233734   |
| H199 | -3.288636759 | 1.835781071  | 11.062139998  |
| H200 | -3.685320291 | 0.120231777  | 10.785031948  |
| H201 | -0.949249509 | -0.139495573 | 10.786287265  |
| H202 | 9.548510883  | -7.524509481 | 6.498246005   |
| H203 | -1.416078890 | -5.942540941 | -3.750224555  |
| H204 | -0.030135220 | -8.669903739 | 1.392122754   |
| H205 | -1.348195764 | -6.748530378 | -8.175046210  |
| H206 | 0.250289966  | -6.036863450 | -8.526604412  |
| H207 | -2.199670720 | -4.679940743 | -7.269088866  |
| H208 | -1.379940080 | 0.498609174  | -10.136479459 |
| H209 | -1.948501544 | -4.793221322 | -9.804036403  |
| H210 | -3.042415146 | -1.924697028 | -2.712659542  |
| H211 | -3.990762423 | -4.465644123 | -1.279950787  |
| H212 | -0.868574584 | -1.561358076 | -8.600284018  |
| H213 | -3.603344631 | -0.689719744 | -9.313916925  |
| H214 | 0.431605054  | -3.103868940 | -9.377840065  |
| H215 | -1.212120908 | -5.528328855 | -2.048875414  |
| H216 | -0.603860523 | -3.927641213 | -7.197828296  |
| H217 | 0.328447224  | -4.547785314 | -10.162065488 |
| H218 | -6.440297383 | -3.035011521 | -3.556244330  |
| H219 | -3.397041386 | -1.878579425 | -0.983536393  |
| H220 | 1.671223564  | -5.842097388 | -6.950429908  |
| H221 | -2.336745911 | -3.890629614 | -1.050537549  |
| H222 | -3.843544424 | 3.271959881  | 2.174635425   |
| H223 | -2.578079622 | 1.065827686  | 0.857729217   |
| H224 | -8.372404926 | 1.659761461  | 2.304963513   |
| H225 | -7.170902322 | 0.704595060  | -0.258041675  |
| H226 | -6.645578192 | 4.792188321  | 0.668357381   |
| H227 | -8.108401376 | 9.730573731  | 1.876025972   |
| H228 | -7.299322423 | 6.231799389  | 3.426083490   |
| H229 | -8.747826263 | 6.394988684  | 1.039665790   |
| H230 | -5.888422196 | 7.540129435  | 1.022711624   |
| H231 | -9.507819933 | 10.361431256 | -2.071601690  |
| H232 | -2.857022950 | 4.687496496  | 0.407430525   |
| H233 | -4.241363941 | 4.426220205  | -0.654329552  |
| H234 | -9.029181798 | 11.421975552 | 0.201469843   |
| H235 | -7.749824245 | 6.381598495  | -0.414603511  |
| H236 | -5.548944020 | 2.203424425  | 0.200388093   |
| H237 | -7.207780841 | 0.339671792  | 2.180455092   |
| H238 | -9.568307852 | 2.500381759  | -2.035162855  |

|      |               |              |              |
|------|---------------|--------------|--------------|
| H239 | -1.297373732  | 1.602746733  | -3.153117066 |
| H240 | -10.017313544 | 0.798448017  | -1.811606379 |
| H241 | 9.624807029   | 2.240019091  | 4.910094800  |
| H242 | 8.192939955   | 2.578178811  | 4.196640113  |
| H243 | 2.563002357   | 5.836793702  | -1.322264932 |
| H244 | -0.141284110  | 6.009548465  | -0.216361813 |
| H245 | 2.618690938   | 8.225886492  | -0.208649541 |
| H246 | -2.645668877  | 3.719652403  | -2.482364119 |
| H247 | -3.944169919  | 4.429437602  | -4.052242218 |
| H248 | -3.649460139  | 5.745382637  | -3.213326223 |
| H249 | -4.336613178  | 1.634494272  | -4.866606030 |
| H250 | -6.052106088  | 1.665107385  | -5.370706293 |
| H251 | 1.480937353   | 12.051848835 | -2.954329531 |
| H252 | 0.213414563   | 13.307564975 | -3.035990678 |
| H253 | 0.915954171   | 9.870355864  | -3.577269380 |
| H254 | -0.751684407  | 9.374168819  | -3.769660144 |
| H255 | -0.903950225  | 8.746694485  | -7.188891918 |
| H256 | -0.726435700  | 4.293047684  | -6.442199107 |
| H257 | -6.048120444  | 9.199660035  | -2.412117802 |
| H258 | -2.105103314  | 9.016656864  | 0.618394652  |
| H259 | -2.847023996  | 7.748304698  | -4.424135067 |
| H260 | 2.488541622   | 4.560026104  | -3.725379543 |
| H261 | 3.874403816   | 6.489008886  | -3.157923403 |
| H262 | -0.025068217  | 4.401601813  | -3.843118342 |
| H263 | -7.847498074  | 0.134073900  | -2.538865838 |
| H264 | 5.411410582   | 9.082379271  | -4.284409040 |
| H265 | -5.608910975  | -0.626373572 | -4.006772557 |
| H266 | 2.515929485   | 5.344539085  | -5.309824111 |
| H267 | -2.292123750  | 7.410272582  | -1.243510174 |
| H268 | -6.056433164  | 3.706521341  | -3.995685228 |
| H269 | 4.866734981   | 9.771003026  | -2.741817557 |
| H270 | -0.323958342  | 7.165554683  | -7.589168026 |
| H271 | -2.711660894  | 8.879252517  | -5.716880557 |
| H272 | -4.828124974  | -3.307917700 | -3.899799902 |
| H273 | -5.708327464  | -2.691844862 | -1.411456454 |
| H274 | -5.793254700  | 10.897070880 | -0.623990598 |
| H275 | -5.021119657  | 1.836964685  | -2.484419806 |
| H276 | 1.300845505   | 7.318449935  | -4.397174655 |
| H277 | 0.431978094   | 5.610453405  | -6.604359195 |
| H278 | 0.892401451   | 3.497391144  | -5.036644219 |
| H279 | -1.935343019  | 5.672883139  | -4.729814193 |
| H280 | 1.591889673   | 9.585920144  | 2.128828440  |
| H281 | 0.733850550   | 10.261330801 | -1.020257067 |
| H282 | 1.174636032   | 13.145358777 | -0.788403041 |
| H283 | 3.143629932   | 9.835622995  | 1.302463313  |
| H284 | -1.337445393  | 11.165806708 | 0.281457055  |
| H285 | 5.780843823   | -3.927423947 | -8.107129587 |
| H286 | 5.544942155   | -5.335669985 | -7.056730047 |
| H287 | 7.994047060   | -6.081725356 | -2.937282888 |
| H288 | 6.216570279   | -6.090519619 | -9.221741021 |
| H289 | 4.618960333   | -6.439175839 | -9.109008371 |
| H290 | 6.260798170   | 4.508865249  | 0.053291340  |
| H291 | 6.449876893   | 7.403559319  | 1.133965777  |
| H292 | 6.387506649   | 7.305024599  | -3.147005433 |
| H293 | 4.869297372   | 5.556497104  | 0.465791210  |
| H294 | 7.768979915   | 7.753078336  | 0.229916522  |
| H295 | 6.274424409   | 2.283629350  | -5.697469448 |
| H296 | 7.176100900   | 6.205766862  | -1.443821861 |
| H297 | 3.704510780   | -6.581322223 | 6.282590680  |
| H298 | 5.690134228   | -8.040966252 | 4.457531787  |
| H299 | 4.729677600   | 0.615324316  | -6.296184029 |

|      |              |               |              |
|------|--------------|---------------|--------------|
| H300 | 4.159313001  | 0.024685646   | 3.576384256  |
| H301 | 2.073764485  | 0.807641994   | -8.556913150 |
| H302 | -0.523486999 | -2.559681638  | -4.199399485 |
| H303 | 1.549757168  | 1.475006623   | -7.012052421 |
| H304 | 3.099795727  | -4.132283509  | 5.270822079  |
| H305 | 3.089888352  | -0.522865450  | -6.056539050 |
| H306 | 3.077273290  | -4.860075052  | 3.661271397  |
| H307 | 3.446193482  | -7.058893928  | 4.590669708  |
| H308 | 5.467152356  | -5.577059609  | 3.963388102  |
| H309 | 5.443846401  | -4.947005299  | 5.617585586  |
| H310 | -4.005486648 | -1.051045232  | -7.034223808 |
| H311 | 4.050139386  | -9.098786847  | 6.734815349  |
| H312 | 3.017063114  | -11.607504713 | 5.270082798  |
| H313 | 0.902249150  | -0.543926626  | -3.776028730 |
| H314 | 4.076505064  | -11.314350441 | 7.970782692  |
| H315 | 2.532469181  | -11.536462822 | 7.472500485  |
| H316 | 4.765752174  | -3.302650491  | 2.928075862  |
| H317 | 0.351030664  | 1.592099918   | -4.862997606 |
| H318 | -2.478236156 | -2.398382582  | -5.723118628 |
| H319 | 6.736318092  | -10.549669628 | 0.746565591  |
| H320 | 6.470580276  | -8.593841273  | -2.076232026 |
| H321 | 5.618359656  | -8.625443912  | 1.739391731  |
| H322 | 6.085900547  | -11.281587240 | -0.444769049 |
| H323 | 6.620867381  | 1.471654381   | -8.596371825 |
| H324 | 5.898222969  | -5.532450488  | 1.156417938  |
| H325 | 1.583204937  | -7.344614864  | 1.902767420  |
| H326 | 4.340865532  | -2.766089311  | -6.766786210 |
| H327 | 2.199543212  | -9.240655677  | 0.399575686  |
| H328 | 3.727845119  | -7.604707520  | -5.981594826 |
| H329 | 2.698564429  | -5.912114560  | -4.385215458 |
| H330 | 4.527418009  | -12.283445586 | 5.893947163  |
| H331 | 4.649514063  | -1.133774840  | 2.372120134  |
| H332 | 7.571009157  | -6.388585073  | 2.659654574  |
| H333 | 6.839075891  | -4.311348829  | 1.336184980  |
| H334 | 7.666117816  | -7.202059237  | 4.896829746  |
| H335 | 3.497238782  | -2.285175252  | 6.118911083  |
| H336 | 2.181567425  | -12.097959709 | -2.229700095 |
| H337 | 3.150530676  | -8.698623982  | -2.462160339 |
| H338 | 4.280763942  | -8.915156861  | -1.106448502 |
| H339 | 1.209868080  | -8.739623534  | -1.000651796 |
| H340 | 2.239176666  | -2.638407172  | -5.598246832 |
| H341 | -1.613728062 | 1.768299350   | -6.416464551 |
| H342 | -3.783251434 | 0.706100797   | -7.228569956 |
| H343 | 1.526519532  | -5.690359712  | 1.211629048  |
| H344 | 7.488885932  | -7.938512214  | 2.705216063  |
| H345 | 6.043087651  | -9.667765682  | 2.811581584  |
| H346 | 3.150399165  | -0.690454879  | 5.578882204  |
| H347 | 5.918858995  | -8.579936557  | -5.064663301 |
| H348 | 6.234841107  | -6.990349965  | -1.369877045 |
| H349 | 1.472213160  | -3.519928910  | -6.956185317 |
| H350 | 5.506795323  | 3.416266043   | -6.840157578 |
| H351 | 6.323738299  | -0.253602547  | 5.497832942  |
| H352 | 6.891652355  | 0.031052414   | 3.833718987  |
| H353 | 9.363962433  | -7.583272541  | -4.095277496 |
| H354 | 8.551724765  | -8.901132913  | -3.565262631 |
| H355 | 9.554586750  | -9.580821560  | 0.840552033  |
| H356 | 8.038137044  | -9.056198434  | -0.777598620 |
| H357 | 11.351480830 | -8.816194026  | -1.077413280 |
| H358 | 9.557690295  | -7.848163954  | 1.238290845  |
| H359 | 9.426215331  | -0.702548764  | 4.537918647  |
| H360 | -2.037287786 | 13.707042871  | 2.128736865  |

|       |              |               |              |
|-------|--------------|---------------|--------------|
| H361  | 8.402716611  | -7.132879294  | 7.812036395  |
| H362  | 8.258608151  | -4.727376626  | 6.504244120  |
| H363  | -3.613972198 | 12.819509455  | -0.302879449 |
| H364  | -3.134368282 | 10.826112874  | 1.995157917  |
| H365  | -4.701598410 | 11.523310332  | 1.545652534  |
| H366  | -5.121929401 | 7.386220345   | -3.424522768 |
| H367  | 2.224719272  | -1.102726721  | 0.068102462  |
| H368  | -0.012563591 | -1.501969594  | 0.292831925  |
| H369  | -1.240055586 | 0.067502359   | -1.127242678 |
| Mo370 | 3.678973776  | -4.755827662  | -1.452852828 |
| N371  | -7.232794136 | -6.455970060  | -1.268181534 |
| N372  | -9.328307198 | -3.663029855  | 0.068052096  |
| N373  | -9.636032450 | -3.777708119  | 2.885062313  |
| N374  | -7.288429528 | -5.064898606  | 3.736595083  |
| N375  | -5.291228323 | -3.177873960  | 2.912417789  |
| N376  | -6.010600461 | -0.981601602  | 4.567880801  |
| N377  | -5.967287942 | -2.056087279  | 7.262780479  |
| N378  | -3.622026464 | -3.695021135  | 7.611275593  |
| N379  | -1.442347043 | -2.373092872  | 6.511795573  |
| N380  | -1.500134244 | 0.615713458   | 6.554899158  |
| N381  | -2.684741701 | 0.997147611   | 9.194358793  |
| N382  | 3.395952345  | -11.034831015 | 7.261174564  |
| N383  | 4.573351533  | -9.080260848  | 5.852548909  |
| N384  | 4.306412140  | -3.181574184  | 3.834775056  |
| N385  | 3.366572218  | -1.652791949  | 5.335661383  |
| N386  | 4.134532952  | -0.941612638  | 3.257268939  |
| N387  | 7.538249256  | -7.201862405  | 5.932643602  |
| N388  | -5.511859612 | -2.607224747  | -3.557267092 |
| N389  | -1.731956327 | -5.428250782  | -2.922840593 |
| N390  | -5.639348990 | -0.010663192  | -3.176944017 |
| N391  | -8.037685460 | 1.123318273   | -2.397441030 |
| N392  | -7.832886032 | 1.187274161   | 0.358656983  |
| N393  | -5.564772638 | 2.741216041   | 1.066240508  |
| N394  | -2.447358044 | 2.904803265   | -1.847892565 |
| N395  | -1.776603868 | 0.968697245   | -1.148014386 |
| N396  | -6.131478045 | 5.456203013   | 1.243061417  |
| N397  | -8.804859665 | 8.540312492   | -1.157343787 |
| N398  | -8.879849776 | 10.439725543  | -0.013443800 |
| N399  | 8.821910439  | 1.809057248   | 4.445540864  |
| N400  | 7.136476027  | 6.991932259   | 0.493751817  |
| N401  | 5.707313902  | 7.855101893   | -2.629076556 |
| N402  | 3.167492437  | 7.139265084   | -3.533847947 |
| N403  | -1.268515849 | 6.034220184   | -5.434685585 |
| N404  | -0.765923056 | 7.779379628   | -6.913853025 |
| N405  | -2.291993213 | 8.108557564   | -5.203088675 |
| N406  | 1.624947892  | 6.278065075   | -1.281324593 |
| N407  | 1.806838033  | 8.585767512   | 0.303374050  |
| N408  | 0.819406933  | 11.128417323  | -0.488116592 |
| N409  | -0.083593396 | 10.083161552  | -3.470389619 |
| N410  | -1.682731219 | 12.110645073  | 0.132563945  |
| N411  | 5.286692788  | -5.666817169  | -9.189796941 |
| N412  | 3.531245248  | -3.293687874  | -7.108331938 |
| N413  | 2.541192419  | -0.386910397  | -6.928762056 |
| N414  | 4.702787321  | 1.486925522   | -6.838875075 |
| N415  | -0.190999316 | -3.695868374  | -9.941061417 |
| N416  | -1.867001653 | -1.647690073  | -8.817558162 |
| N417  | 8.432736103  | -7.918105445  | -3.831050543 |
| N418  | 4.405969511  | -6.333614512  | -3.144937705 |
| N419  | 4.151967105  | -7.328566533  | -5.100047663 |
| N420  | 8.805019475  | -8.390878667  | -0.682029395 |
| N421  | 0.557902945  | 1.698285269   | 0.562668902  |

|      |              |               |              |
|------|--------------|---------------|--------------|
| N422 | 1.330763883  | 1.133304953   | -0.046138395 |
| O423 | -7.233691665 | -4.328592365  | 0.665868776  |
| O424 | -8.452704442 | -1.836506837  | 3.041918386  |
| O425 | -7.579894290 | -4.140864450  | 5.806029740  |
| O426 | -4.085837041 | -3.890288889  | 4.706581816  |
| O427 | -3.832724217 | -0.319156837  | 4.495624332  |
| O428 | -5.159632046 | -0.007096400  | 7.872642076  |
| O429 | -3.747452906 | -3.272843632  | 9.862902228  |
| O430 | 0.019472490  | -3.969244059  | 7.287512908  |
| O431 | 0.679667257  | 0.217849209   | 7.112236399  |
| O432 | -0.926513821 | 2.393471932   | 9.522875607  |
| O433 | -1.505223555 | 0.685937799   | 12.568106660 |
| O434 | 5.284558672  | -10.512808474 | 4.180314644  |
| O435 | 6.093656867  | -7.548456739  | 7.686999880  |
| O436 | 10.219383384 | -5.053061014  | 6.962641628  |
| O437 | -5.460744031 | -0.133196781  | -0.893334767 |
| O438 | -3.386090527 | -4.418879289  | -4.115153324 |
| O439 | -7.233599277 | 3.242217851   | -2.706769252 |
| O440 | -5.287969261 | 3.435742019   | -4.564681309 |
| O441 | -9.860541870 | 2.257969512   | 0.539204959  |
| O442 | -6.219800172 | 2.714415965   | 3.252503799  |
| O443 | -4.305598788 | 5.752377687   | 2.585344793  |
| O444 | -6.832114596 | 8.215538807   | 3.358107706  |
| O445 | 9.061075943  | -1.028399997  | 6.520104573  |
| O446 | 3.243629547  | 4.979051137   | 4.296636794  |
| O447 | 4.671065917  | 8.202493589   | -0.629201425 |
| O448 | 2.667477617  | 9.334552072   | -4.001691043 |
| O449 | -0.220970963 | 6.917628731   | -2.478355927 |
| O450 | -0.087614070 | 7.961993442   | 1.432502854  |
| O451 | 2.688795978  | 5.843703529   | 1.564242628  |
| O452 | 1.846756354  | 12.126807407  | 1.296618780  |
| O453 | -1.257663828 | 14.120126525  | -0.858011332 |
| O454 | -1.769675572 | 11.610044568  | -3.263401803 |
| O455 | -3.982721704 | 14.258426804  | 1.850046103  |
| O456 | -4.256223872 | 7.285585057   | -2.983510300 |
| O457 | 2.809241773  | -5.277401233  | -8.017199208 |
| O458 | 1.106594876  | -1.434529082  | -8.377022715 |
| O459 | 3.460058699  | 2.975983553   | -8.051769726 |
| O460 | 8.054481782  | 2.575844143   | -7.653778819 |
| O461 | -3.606322520 | -3.022346756  | -9.357487914 |
| O462 | -0.885984174 | -6.884389379  | -5.584793457 |
| O463 | 1.165308466  | -6.230075653  | -6.168867649 |
| O464 | -2.313370168 | 1.886285699   | -8.974407978 |
| O465 | 9.865215161  | -6.492301027  | -1.312479548 |
| O466 | 12.099904397 | -8.249901603  | 0.734972805  |
| O467 | -0.709111517 | -6.117225531  | -0.081419601 |
| O468 | -0.657750784 | -8.121737343  | 0.883317487  |
| O469 | 4.181447887  | -11.423397355 | -1.352944230 |
| O470 | 2.095615278  | -11.122565424 | -2.166300760 |
| O471 | 4.633237490  | -6.210576697  | -0.020955261 |
| O472 | 4.125245698  | -7.806920837  | 1.483933392  |
| O473 | 2.285811694  | -6.303530114  | -1.207938816 |
| O474 | 7.962260383  | -7.170573589  | 3.122062324  |
| O475 | 6.526830142  | -5.114411304  | 1.797638432  |
| O476 | -3.212782746 | 4.958152743   | -3.624751494 |
| O477 | 6.943179986  | -11.190994105 | 0.020303116  |
| O478 | 6.392763295  | -9.194939169  | 2.012199657  |
| S479 | 4.615249873  | 4.614509354   | -1.753615680 |
| S480 | 2.715860023  | 1.615572007   | -2.718496534 |
| S481 | 2.229827468  | -3.603244999  | -2.930346380 |
| S482 | 4.123545541  | 1.409579425   | 0.551113115  |

|                       |                        |              |               |              |
|-----------------------|------------------------|--------------|---------------|--------------|
|                       | S483                   | 0.053498441  | -1.970595058  | -0.982138027 |
|                       | S484                   | 4.779397732  | -1.282988421  | -4.717624961 |
|                       | S485                   | 3.108392374  | -3.593572480  | 0.537976677  |
|                       | S486                   | 6.343649794  | 1.081921557   | -2.201534524 |
|                       | S487                   | 5.801242712  | -3.804455856  | -1.999760885 |
|                       | S488                   | 6.298064880  | -1.536094811  | 0.880145855  |
| <b>4u(b)</b>          | bm2cnx2b262n2x47.car_4 |              |               |              |
| Fe( 139) 0.566 2.493  | C1                     | -8.238300071 | -4.492280541  | -0.020911322 |
| Fe( 140) 0.330 0.113  | C2                     | -8.414336138 | -5.691626139  | -0.959109510 |
| Fe( 141) 0.512 1.851  | C3                     | -9.260697753 | -2.433100091  | 0.853046972  |
| Fe( 142) 0.542 -2.563 | C4                     | -9.075887889 | -2.653274184  | 2.352836183  |
| Fe( 143) 0.585 3.031  | C5                     | -9.474019333 | -4.084289657  | 4.290477843  |
| Fe( 144) 0.491 -2.073 | C6                     | -8.030554633 | -4.421532250  | 4.679532065  |
| Fe( 145) 0.382 0.055  | C7                     | -5.880890667 | -5.335594154  | 3.940173989  |
| <b>S=3/2</b>          | C8                     | -5.007434876 | -4.079563718  | 3.895762901  |
|                       | C9                     | -4.548421343 | -1.931960197  | 2.841347299  |
|                       | C10                    | -4.763758293 | -1.013248223  | 4.053409453  |
|                       | C11                    | -6.295946066 | -0.161209917  | 5.738778224  |
|                       | C12                    | -5.750407160 | -0.736157848  | 7.052718108  |
|                       | C13                    | -5.662263731 | -2.674729664  | 8.547661410  |
|                       | C14                    | -4.241324790 | -3.221743008  | 8.729479807  |
|                       | C15                    | -2.317125818 | -4.330041150  | 7.673845249  |
|                       | C16                    | -1.128379212 | -3.525651011  | 7.137058845  |
|                       | C17                    | -0.447743187 | -1.521103236  | 5.838692002  |
|                       | C18                    | -0.363765720 | -0.152514358  | 6.539693645  |
|                       | C19                    | -0.683442270 | -1.431358372  | 4.308215201  |
|                       | C20                    | 0.248978816  | -0.412156122  | 3.644582728  |
|                       | C21                    | -0.534366548 | -2.815366602  | 3.667548527  |
|                       | C22                    | -1.527563486 | 1.919030004   | 7.193704352  |
|                       | C23                    | -1.681369534 | 1.780824711   | 8.720898825  |
|                       | C24                    | -2.604662792 | 2.837516366   | 6.566845676  |
|                       | C25                    | -2.725142197 | 4.154410126   | 7.343531940  |
|                       | C26                    | -2.285686585 | 3.115238422   | 5.092534672  |
|                       | C27                    | -2.923282741 | 0.878720839   | 10.598577100 |
|                       | C28                    | -1.683930148 | 0.447438810   | 11.358824035 |
|                       | C29                    | 3.880629401  | -11.381605781 | 5.919191623  |
|                       | C30                    | 4.664336649  | -10.263955229 | 5.233370351  |
|                       | C31                    | 5.245793797  | -7.841730249  | 5.434729523  |
|                       | C32                    | 6.347483814  | -7.510370821  | 6.460000979  |
|                       | C33                    | 4.216048267  | -6.704900842  | 5.314108074  |
|                       | C34                    | 4.816562195  | -5.385256864  | 4.823675063  |
|                       | C35                    | 3.719312494  | -4.400059716  | 4.422879065  |
|                       | C36                    | 3.914365622  | -1.917086392  | 4.193029073  |
|                       | C37                    | 8.699763603  | -6.895888116  | 6.759898290  |
|                       | C38                    | 9.092693805  | -5.434012854  | 6.737930478  |
|                       | C39                    | -5.113406182 | -2.175682536  | -2.211668219 |
|                       | C40                    | -5.414508685 | -0.679781980  | -2.021979013 |
|                       | C41                    | -3.614366029 | -2.401001378  | -1.923443427 |
|                       | C42                    | -3.163050846 | -3.863050430  | -1.746802486 |
|                       | C43                    | -2.764974117 | -4.589026482  | -3.028812671 |
|                       | C44                    | -5.731612327 | 1.433296980   | -3.232618056 |
|                       | C45                    | -7.084538072 | 2.001036997   | -2.779727308 |
|                       | C46                    | -5.335185414 | 2.000374977   | -4.610539929 |
|                       | C47                    | -9.210977596 | 1.528176526   | -1.661030147 |
|                       | C48                    | -8.989400187 | 1.695873963   | -0.149409309 |
|                       | C49                    | -7.477766447 | 1.317155037   | 1.757332060  |
|                       | C50                    | -6.360403143 | 2.307869935   | 2.089646202  |
|                       | C51                    | -4.451594248 | 3.644142256   | 1.339000044  |
|                       | C52                    | -4.950952943 | 5.042443581   | 1.790860975  |
|                       | C53                    | -3.580402401 | 3.889330219   | 0.096074532  |



|      |              |              |              |
|------|--------------|--------------|--------------|
| C54  | -2.892748171 | 2.709043116  | -0.519281905 |
| C55  | -2.465439080 | 1.488254289  | -0.054929151 |
| C56  | -1.791690647 | 1.662951483  | -2.157574102 |
| C57  | -6.627948845 | 6.808971154  | 1.367090531  |
| C58  | -6.911941934 | 7.090549526  | 2.840333042  |
| C59  | -7.923711988 | 6.918848113  | 0.528340363  |
| C60  | -8.348975066 | 8.306436459  | 0.144105434  |
| C61  | -8.392782721 | 9.475749765  | 0.878975380  |
| C62  | -9.110319853 | 9.833549010  | -1.187670086 |
| C63  | 8.148935180  | 0.894964875  | 5.369273119  |
| C64  | 8.960596672  | -0.382131248 | 5.479960857  |
| C65  | 6.759344367  | 0.493543606  | 4.807977557  |
| C66  | 5.815141038  | 1.666905457  | 4.688941330  |
| C67  | 4.995550413  | 2.055515027  | 5.764707342  |
| C68  | 5.742982734  | 2.417210464  | 3.501185167  |
| C69  | 4.130061497  | 3.149959322  | 5.660372074  |
| C70  | 4.892750171  | 3.518072532  | 3.385844742  |
| C71  | 4.085404684  | 3.881971304  | 4.466935077  |
| C72  | 6.451819630  | 6.556841101  | -0.686975652 |
| C73  | 5.531486176  | 7.624187465  | -1.294001363 |
| C74  | 5.631330540  | 5.318941020  | -0.305983348 |
| C75  | 4.908534534  | 8.864007147  | -3.325218866 |
| C76  | 3.465936431  | 8.459321889  | -3.633316324 |
| C77  | 1.817337917  | 6.621296335  | -3.718345076 |
| C78  | 0.978994734  | 6.610787935  | -2.422484505 |
| C79  | 1.916078048  | 5.236488867  | -4.384872731 |
| C80  | 0.605603054  | 4.515542215  | -4.721746540 |
| C81  | -0.237232451 | 5.094071482  | -5.872622822 |
| C82  | -1.445709121 | 7.278421755  | -5.851780384 |
| C83  | 0.890983000  | 6.315750617  | -0.001604330 |
| C84  | 0.823705889  | 7.713775600  | 0.647209271  |
| C85  | 1.453464396  | 5.329495311  | 1.029182649  |
| C86  | 2.070647964  | 9.759333062  | 1.151540030  |
| C87  | 1.586632968  | 11.117357449 | 0.653180223  |
| C88  | 0.431880680  | 12.402345997 | -1.098075151 |
| C89  | -0.920992484 | 12.955831419 | -0.600722926 |
| C90  | 0.460981870  | 12.313803381 | -2.639685532 |
| C91  | -0.566698927 | 11.324873475 | -3.175057432 |
| C92  | -3.029924265 | 12.444453874 | 0.554087963  |
| C93  | -3.016771361 | 13.565182423 | 1.588084024  |
| C94  | -3.729003817 | 11.188301222 | 1.142218244  |
| C95  | -3.913317880 | 10.104567850 | 0.105290381  |
| C96  | -5.025969490 | 10.118196863 | -0.749311398 |
| C97  | -2.955610446 | 9.093143420  | -0.068963730 |
| C98  | -5.173057813 | 9.167194742  | -1.761817527 |
| C99  | -3.071826605 | 8.148559050  | -1.093010482 |
| C100 | -4.181113416 | 8.201977897  | -1.933942684 |
| C101 | 5.174195621  | -4.852439244 | -7.996438999 |
| C102 | 3.723904620  | -4.488158029 | -7.722175708 |
| C103 | 2.233971264  | -2.787685274 | -6.690113144 |
| C104 | 1.901742890  | -1.475409599 | -7.410815463 |
| C105 | 2.381091424  | 0.927708177  | -7.519060864 |
| C106 | 3.582418111  | 1.870147142  | -7.503111483 |
| C107 | 5.851977999  | 2.374848137  | -6.727525859 |
| C108 | 6.929355028  | 2.125764509  | -7.764268404 |
| C109 | -1.411834406 | -4.041243732 | -9.204418660 |
| C110 | -2.388299098 | -2.859953683 | -9.147730775 |
| C111 | -1.230344072 | -4.623539211 | -7.783975364 |
| C112 | -0.607410431 | -6.031668093 | -7.828474924 |
| C113 | -0.145516963 | -6.444582635 | -6.450435674 |
| C114 | -2.709326596 | -0.479476948 | -8.677621649 |

|       |               |               |              |
|-------|---------------|---------------|--------------|
| C115  | -2.061382383  | 0.734237087   | -9.313662023 |
| C116  | -3.227769824  | -0.252451407  | -7.234403195 |
| C117  | -2.135606599  | -0.322164357  | -6.196377486 |
| C118  | -1.312615438  | 0.783867631   | -5.922376065 |
| C119  | -1.873914450  | -1.532233995  | -5.530521900 |
| C120  | -0.239218838  | 0.664287075   | -5.030863015 |
| C121  | -0.804809174  | -1.649058618  | -4.636045071 |
| C122  | 0.025544229   | -0.551172876  | -4.389485920 |
| C123  | 7.927621750   | -7.128675559  | -2.656081368 |
| C124  | 8.909384134   | -7.289635059  | -1.480941694 |
| C125  | 6.477048139   | -7.470419604  | -2.278221340 |
| C126  | 5.436429948   | -7.170571357  | -3.318110101 |
| C127  | 5.282555627   | -7.786659266  | -4.544243769 |
| C128  | 3.598693068   | -6.389441135  | -4.205556067 |
| C129  | 9.725562098   | -8.590137784  | 0.410439948  |
| C130  | 11.166388439  | -8.525390680  | -0.044970909 |
| C131  | -0.096099937  | -6.947081881  | 0.586189769  |
| C132  | 1.329013177   | -6.744302045  | 1.022516132  |
| C133  | 2.372224164   | -7.122794332  | -0.105352835 |
| C134  | 2.159323864   | -8.607499584  | -0.525436505 |
| C135  | 3.250455939   | -9.125427189  | -1.480023055 |
| C136  | 3.245334499   | -10.619092155 | -1.644616529 |
| C137  | 3.782983683   | -7.044350651  | 0.552813812  |
| C138  | 3.964956328   | -1.160863022  | -1.534116874 |
| Fe139 | 4.247606406   | -2.507305165  | -2.945925920 |
| Fe140 | 2.748199033   | 0.359994508   | -0.941700143 |
| Fe141 | 5.364717184   | -0.084218374  | -0.602114993 |
| Fe142 | 4.457725744   | 0.074611514   | -3.005636654 |
| Fe143 | 4.574190943   | 2.347115446   | -1.556142445 |
| Fe144 | 4.824860196   | -2.543992576  | -0.388697854 |
| Fe145 | 2.390154626   | -2.237406727  | -1.056398032 |
| H146  | -6.749263968  | -6.720467460  | -0.387298090 |
| H147  | -6.549300366  | -5.876730692  | -1.771526150 |
| H148  | -10.090489667 | -3.789481203  | -0.576071314 |
| H149  | -8.872795174  | -5.345216534  | -1.899090242 |
| H150  | -9.161791723  | -6.352991918  | -0.486466484 |
| H151  | -8.429988582  | -1.789513124  | 0.530232744  |
| H152  | -10.155273714 | -4.399876819  | 2.272164322  |
| H153  | -10.201169001 | -1.887885105  | 0.695977424  |
| H154  | -10.115161772 | -4.942584766  | 4.533012934  |
| H155  | -7.673263683  | -5.154350540  | 2.796700966  |
| H156  | -9.783751636  | -3.234543030  | 4.913126857  |
| H157  | -3.469503379  | -2.127341822  | 2.784646982  |
| H158  | -5.993145905  | -3.400415349  | 2.207926455  |
| H159  | -5.548381975  | -6.037142768  | 3.163446846  |
| H160  | -5.854333860  | 0.835052870   | 5.609889669  |
| H161  | -6.778318641  | -1.488210953  | 4.114979291  |
| H162  | -5.723459841  | -5.802494821  | 4.919956524  |
| H163  | -4.851257418  | -1.408340194  | 1.922949099  |
| H164  | -6.518681943  | -2.604541309  | 6.594217488  |
| H165  | -7.385902613  | -0.052737812  | 5.826713138  |
| H166  | -1.228048396  | -3.545027294  | 4.108967714  |
| H167  | -0.738007402  | -2.766709266  | 2.586889847  |
| H168  | 0.491634941   | -3.196771436  | 3.790050654  |
| H169  | -1.720663972  | -1.089268362  | 4.160158910  |
| H170  | -6.359166313  | -3.511695028  | 8.702470767  |
| H171  | -2.250587873  | 2.194352768   | 4.493982294  |
| H172  | -3.370495642  | 0.570988983   | 8.535175075  |
| H173  | -3.020107024  | 3.997227879   | 8.391575052  |
| H174  | -0.006172297  | -0.300755139  | 2.580407760  |
| H175  | 1.298836614   | -0.733882490  | 3.688211483  |

|      |              |              |               |
|------|--------------|--------------|---------------|
| H176 | 8.004014409  | 1.293508557  | 6.391207376   |
| H177 | -3.051550714 | 3.773033842  | 4.655954941   |
| H178 | -3.481203853 | 4.797847460  | 6.870003653   |
| H179 | -1.311967693 | 3.623547795  | 5.000179951   |
| H180 | -1.765983008 | 4.696489363  | 7.340749617   |
| H181 | -3.575398701 | 2.311881463  | 6.625371748   |
| H182 | -0.540322328 | 2.385274495  | 7.057000834   |
| H183 | -2.309778436 | 0.314465871  | 5.992381336   |
| H184 | 0.174366542  | 0.584800858  | 4.105127693   |
| H185 | 1.596745950  | 4.348216005  | 0.544094519   |
| H186 | 0.698886375  | 5.219798849  | 1.823608801   |
| H187 | 2.780476197  | 5.489017154  | 2.472705273   |
| H188 | 2.698393887  | 5.087800265  | 5.089268371   |
| H189 | 4.830602686  | 4.074782997  | 2.450223456   |
| H190 | 6.340158375  | 2.116720550  | 2.636970322   |
| H191 | 5.025454056  | 1.492312999  | 6.701534806   |
| H192 | -2.426259535 | -2.156821529 | 6.367856410   |
| H193 | -2.343579394 | -5.272939057 | 7.107239503   |
| H194 | -2.100708236 | -4.572205201 | 8.722474865   |
| H195 | -4.117198849 | -3.723139634 | 6.716506161   |
| H196 | -5.818576735 | -1.946564583 | 9.354005305   |
| H197 | 3.491594248  | 3.432007477  | 6.502330958   |
| H198 | 0.524248213  | -1.995702328 | 6.026726088   |
| H199 | -3.296255867 | 1.818606624  | 11.037511278  |
| H200 | -3.688025026 | 0.102525874  | 10.757141228  |
| H201 | -0.953240372 | -0.153104538 | 10.767323136  |
| H202 | 9.566811725  | -7.511857927 | 6.477410467   |
| H203 | -1.407283936 | -5.951683997 | -3.742865177  |
| H204 | -0.037562871 | -8.673635829 | 1.447453651   |
| H205 | -1.362622766 | -6.751707894 | -8.173867416  |
| H206 | 0.238812326  | -6.049089572 | -8.530080266  |
| H207 | -2.202420102 | -4.679638596 | -7.268872204  |
| H208 | -1.372418478 | 0.499411484  | -10.158749800 |
| H209 | -1.949006073 | -4.793615830 | -9.803007473  |
| H210 | -3.025102415 | -1.918926743 | -2.718677168  |
| H211 | -3.959877158 | -4.456670840 | -1.265057782  |
| H212 | -0.857137009 | -1.562569181 | -8.622740972  |
| H213 | -3.596597016 | -0.678615704 | -9.312154978  |
| H214 | 0.439567454  | -3.119347013 | -9.374232897  |
| H215 | -1.196313665 | -5.525718416 | -2.045041200  |
| H216 | -0.603020477 | -3.935111943 | -7.196694060  |
| H217 | 0.325485192  | -4.560135094 | -10.162094381 |
| H218 | -6.420317397 | -3.026597185 | -3.566549482  |
| H219 | -3.379038609 | -1.869185030 | -0.991201864  |
| H220 | 1.661857666  | -5.850397234 | -6.955070340  |
| H221 | -2.303910391 | -3.871438650 | -1.060918383  |
| H222 | -3.843283312 | 3.262120402  | 2.172698351   |
| H223 | -2.575411586 | 1.025266419  | 0.918394004   |
| H224 | -8.368442523 | 1.656773179  | 2.300428781   |
| H225 | -7.165538388 | 0.702326733  | -0.262556562  |
| H226 | -6.641353150 | 4.782907220  | 0.660027557   |
| H227 | -8.110129115 | 9.710693581  | 1.898952434   |
| H228 | -7.264430149 | 6.200739833  | 3.415013106   |
| H229 | -8.738211962 | 6.385506689  | 1.049878229   |
| H230 | -5.883061784 | 7.538319369  | 1.011370324   |
| H231 | -9.496908843 | 10.373054103 | -2.048291112  |
| H232 | -2.815227432 | 4.624992860  | 0.394964739   |
| H233 | -4.196876328 | 4.379072314  | -0.675554262  |
| H234 | -9.026035909 | 11.415678632 | 0.234452637   |
| H235 | -7.754314421 | 6.376113729  | -0.414797732  |
| H236 | -5.544542914 | 2.188862940  | 0.195529451   |

|      |               |              |              |
|------|---------------|--------------|--------------|
| H237 | -7.202378794  | 0.337627535  | 2.175762941  |
| H238 | -9.564340793  | 2.494631173  | -2.041421688 |
| H239 | -1.327384974  | 1.436796426  | -3.113794186 |
| H240 | -10.011992822 | 0.792933872  | -1.814056751 |
| H241 | 9.631077912   | 2.240727142  | 4.921661471  |
| H242 | 8.201882303   | 2.578370392  | 4.203145888  |
| H243 | 2.563767794   | 5.863740720  | -1.299422464 |
| H244 | -0.151634836  | 6.033603284  | -0.208485323 |
| H245 | 2.618596025   | 8.234867227  | -0.202944330 |
| H246 | -2.633141848  | 3.596323427  | -2.476937848 |
| H247 | -3.949523824  | 4.421092650  | -4.052163944 |
| H248 | -3.648242962  | 5.719009243  | -3.195131316 |
| H249 | -4.330926143  | 1.641035910  | -4.870696409 |
| H250 | -6.044619543  | 1.656929382  | -5.381908337 |
| H251 | 1.482595926   | 12.049059304 | -2.949072900 |
| H252 | 0.220485858   | 13.309043938 | -3.035233102 |
| H253 | 0.907890685   | 9.868536012  | -3.569359774 |
| H254 | -0.761729181  | 9.380385996  | -3.765237750 |
| H255 | -0.876554981  | 8.750752706  | -7.156192186 |
| H256 | -0.739658304  | 4.277272755  | -6.412328410 |
| H257 | -6.053609881  | 9.182507762  | -2.409766051 |
| H258 | -2.097627100  | 9.018037236  | 0.605518318  |
| H259 | -2.865741129  | 7.742956264  | -4.429234034 |
| H260 | 2.500163815   | 4.571511833  | -3.729287889 |
| H261 | 3.874443412   | 6.502463729  | -3.140177611 |
| H262 | -0.022753326  | 4.401411441  | -3.824600360 |
| H263 | -7.840432875  | 0.129525818  | -2.542305202 |
| H264 | 5.399712561   | 9.101180407  | -4.278674847 |
| H265 | -5.595999578  | -0.625599194 | -4.011926999 |
| H266 | 2.503580379   | 5.362465482  | -5.309250374 |
| H267 | -2.285855860  | 7.408325880  | -1.255498271 |
| H268 | -6.064787594  | 3.703690368  | -4.010950821 |
| H269 | 4.853039025   | 9.790145745  | -2.736974116 |
| H270 | -0.303463781  | 7.172816225  | -7.560608763 |
| H271 | -2.698510066  | 8.885699341  | -5.710241813 |
| H272 | -4.808899655  | -3.307922256 | -3.903048393 |
| H273 | -5.689514651  | -2.690221819 | -1.419344102 |
| H274 | -5.797520025  | 10.880997397 | -0.623149103 |
| H275 | -5.021557858  | 1.842397837  | -2.493410898 |
| H276 | 1.299041481   | 7.327552664  | -4.380768215 |
| H277 | 0.420699870   | 5.589200889  | -6.598264804 |
| H278 | 0.894486754   | 3.498032149  | -5.020195127 |
| H279 | -1.952354486  | 5.666412323  | -4.726513802 |
| H280 | 1.605857413   | 9.603157073  | 2.136774970  |
| H281 | 0.728635306   | 10.265594457 | -1.007785079 |
| H282 | 1.173835038   | 13.152056753 | -0.785757410 |
| H283 | 3.155363360   | 9.845410139  | 1.302515566  |
| H284 | -1.328546700  | 11.165644373 | 0.288256249  |
| H285 | 5.768148247   | -3.936899270 | -8.133384252 |
| H286 | 5.540303996   | -5.334408248 | -7.065288463 |
| H287 | 7.978468205   | -6.065346316 | -2.931508885 |
| H288 | 6.205205464   | -6.113161593 | -9.221775118 |
| H289 | 4.607555664   | -6.461427174 | -9.104961447 |
| H290 | 6.318289872   | 4.546978985  | 0.060900874  |
| H291 | 6.468835372   | 7.455351670  | 1.145043222  |
| H292 | 6.394388281   | 7.338435433  | -3.138449485 |
| H293 | 4.917278252   | 5.578432510  | 0.488164000  |
| H294 | 7.784791056   | 7.813833924  | 0.240672013  |
| H295 | 6.284549937   | 2.283429249  | -5.719254573 |
| H296 | 7.207366494   | 6.260667756  | -1.430858104 |
| H297 | 3.722504184   | -6.563582313 | 6.290270434  |

|      |              |               |              |
|------|--------------|---------------|--------------|
| H298 | 5.693446698  | -8.025897910  | 4.450107176  |
| H299 | 4.745057788  | 0.609037177   | -6.321236272 |
| H300 | 4.113312680  | 0.042524781   | 3.659125066  |
| H301 | 2.079542376  | 0.798704386   | -8.567773008 |
| H302 | -0.613627016 | -2.596793058  | -4.128341413 |
| H303 | 1.559386215  | 1.471227120   | -7.024249164 |
| H304 | 3.081884245  | -4.149442617  | 5.280858624  |
| H305 | 3.099932314  | -0.525521008  | -6.065384370 |
| H306 | 3.065534724  | -4.862047691  | 3.664354170  |
| H307 | 3.446705303  | -7.048142427  | 4.603143419  |
| H308 | 5.455912864  | -5.562782757  | 3.946307326  |
| H309 | 5.450645106  | -4.927668533  | 5.600021614  |
| H310 | -3.983779052 | -1.025098603  | -7.033928845 |
| H311 | 4.059889093  | -9.088044605  | 6.731766145  |
| H312 | 3.019909070  | -11.593264913 | 5.266819649  |
| H313 | 0.864366775  | -0.634052341  | -3.694664778 |
| H314 | 4.075670583  | -11.302166501 | 7.968356061  |
| H315 | 2.532128760  | -11.523297526 | 7.469110512  |
| H316 | 4.672879130  | -3.262736143  | 2.909682259  |
| H317 | 0.410492034  | 1.517913303   | -4.826614923 |
| H318 | -2.517686210 | -2.396577467  | -5.707013327 |
| H319 | 6.729309517  | -10.552042818 | 0.752842205  |
| H320 | 6.424129393  | -8.549680838  | -2.047551350 |
| H321 | 5.603143289  | -8.629118719  | 1.734074240  |
| H322 | 6.083130669  | -11.269236856 | -0.448738441 |
| H323 | 6.620075124  | 1.482785070   | -8.623702798 |
| H324 | 5.872862394  | -5.532163241  | 1.153663627  |
| H325 | 1.555645218  | -7.326633764  | 1.928009896  |
| H326 | 4.342320170  | -2.775154849  | -6.782519283 |
| H327 | 2.161947975  | -9.222142672  | 0.388641772  |
| H328 | 3.697375861  | -7.556104663  | -5.968189511 |
| H329 | 2.667713688  | -5.863001665  | -4.371460795 |
| H330 | 4.526504188  | -12.275948061 | 5.892297840  |
| H331 | 4.551029449  | -1.087509961  | 2.416532708  |
| H332 | 7.574324001  | -6.394943833  | 2.645931916  |
| H333 | 6.843552463  | -4.331694515  | 1.313467503  |
| H334 | 7.678795608  | -7.194891011  | 4.887696800  |
| H335 | 3.510471981  | -2.316156217  | 6.169024983  |
| H336 | 2.178288110  | -12.066318681 | -2.230652943 |
| H337 | 3.116594454  | -8.659113846  | -2.467212812 |
| H338 | 4.246731293  | -8.862218615  | -1.110254363 |
| H339 | 1.175541646  | -8.705619307  | -1.007814529 |
| H340 | 2.243672291  | -2.643447621  | -5.598593733 |
| H341 | -1.503653620 | 1.733581882   | -6.427997379 |
| H342 | -3.730448949 | 0.726569240   | -7.224246959 |
| H343 | 1.473725149  | -5.675902880  | 1.230146248  |
| H344 | 7.484166026  | -7.944287714  | 2.699727610  |
| H345 | 6.021227271  | -9.666184942  | 2.813132542  |
| H346 | 3.107532654  | -0.720855856  | 5.661483552  |
| H347 | 5.889049571  | -8.529566372  | -5.050699785 |
| H348 | 6.209105394  | -6.937399736  | -1.358249621 |
| H349 | 1.471014589  | -3.522034573  | -6.954090383 |
| H350 | 5.506939153  | 3.413676470   | -6.855717964 |
| H351 | 6.334263236  | -0.264683532  | 5.483009387  |
| H352 | 6.904887036  | 0.025467983   | 3.820894948  |
| H353 | 9.319921148  | -7.591005829  | -4.089123236 |
| H354 | 8.492025678  | -8.894923114  | -3.551831136 |
| H355 | 9.554428852  | -9.600522106  | 0.815495350  |
| H356 | 8.021679600  | -9.054552731  | -0.784408578 |
| H357 | 11.337631226 | -8.812599657  | -1.109826249 |
| H358 | 9.562982873  | -7.872133778  | 1.230744973  |

|       |              |               |              |
|-------|--------------|---------------|--------------|
| H359  | 9.434667970  | -0.705056508  | 4.522027841  |
| H360  | -2.049378978 | 13.705421219  | 2.126020187  |
| H361  | 8.425925387  | -7.140874816  | 7.801164639  |
| H362  | 8.261292184  | -4.722431775  | 6.514651888  |
| H363  | -3.612014807 | 12.805869462  | -0.309699060 |
| H364  | -3.133178861 | 10.814008666  | 1.989423280  |
| H365  | -4.700988272 | 11.512177819  | 1.541115259  |
| H366  | -5.119747218 | 7.366726153   | -3.425477004 |
| H367  | 2.205946918  | -0.967282203  | -0.032898733 |
| H368  | -0.017674519 | -1.750564786  | 0.438325539  |
| H369  | -1.241240253 | -0.046811533  | -1.038710313 |
| Mo370 | 3.647851263  | -4.708852774  | -1.405988103 |
| N371  | -7.217328051 | -6.456456326  | -1.257957694 |
| N372  | -9.311826404 | -3.656158567  | 0.065133378  |
| N373  | -9.636800910 | -3.770098610  | 2.879267153  |
| N374  | -7.295753876 | -5.064812397  | 3.738536037  |
| N375  | -5.293782932 | -3.180477296  | 2.919400191  |
| N376  | -6.015113310 | -0.984800099  | 4.573361258  |
| N377  | -5.973368533 | -2.058859974  | 7.266834971  |
| N378  | -3.617776348 | -3.685403519  | 7.609937243  |
| N379  | -1.439073995 | -2.373315826  | 6.488150159  |
| N380  | -1.494475898 | 0.612464595   | 6.531510534  |
| N381  | -2.684621989 | 0.984072023   | 9.170794506  |
| N382  | 3.396390085  | -11.022974416 | 7.257694158  |
| N383  | 4.583226819  | -9.070470739  | 5.849419118  |
| N384  | 4.260513487  | -3.165123779  | 3.842286848  |
| N385  | 3.361452324  | -1.669577552  | 5.401643303  |
| N386  | 4.062255481  | -0.914851030  | 3.316793558  |
| N387  | 7.551942338  | -7.193901093  | 5.923968003  |
| N388  | -5.490182818 | -2.602648557  | -3.565024640 |
| N389  | -1.716357849 | -5.427882066  | -2.919142400 |
| N390  | -5.631674875 | -0.009213124  | -3.182825838 |
| N391  | -8.033484149 | 1.118612529   | -2.402979023 |
| N392  | -7.828259443 | 1.184013247   | 0.354044830  |
| N393  | -5.558348664 | 2.731171935   | 1.058489641  |
| N394  | -2.457259159 | 2.785490098   | -1.839032488 |
| N395  | -1.798230758 | 0.859310563   | -1.090210815 |
| N396  | -6.112002065 | 5.451004664   | 1.215887330  |
| N397  | -8.800437583 | 8.543726459   | -1.144454569 |
| N398  | -8.875956428 | 10.434855855  | 0.013121480  |
| N399  | 8.831905980  | 1.809747461   | 4.450536961  |
| N400  | 7.158276655  | 7.048206076   | 0.505135839  |
| N401  | 5.707421187  | 7.880568171   | -2.620947051 |
| N402  | 3.164295653  | 7.147541047   | -3.517434258 |
| N403  | -1.277004182 | 6.029062841   | -5.425521933 |
| N404  | -0.728921793 | 7.786585290   | -6.874490416 |
| N405  | -2.297175189 | 8.104494352   | -5.198160668 |
| N406  | 1.618791961  | 6.286199591   | -1.266751610 |
| N407  | 1.810680604  | 8.595427963   | 0.314128208  |
| N408  | 0.823521885  | 11.135221693  | -0.481774037 |
| N409  | -0.090727395 | 10.083674948  | -3.458823244 |
| N410  | -1.680128569 | 12.107067611  | 0.133727808  |
| N411  | 5.275160928  | -5.689828205  | -9.193399454 |
| N412  | 3.528825225  | -3.302460845  | -7.114064880 |
| N413  | 2.547789932  | -0.390813813  | -6.935014960 |
| N414  | 4.712722637  | 1.483221711   | -6.858618899 |
| N415  | -0.187292785 | -3.704704001  | -9.939128602 |
| N416  | -1.857203899 | -1.645299238  | -8.834289496 |
| N417  | 8.385054144  | -7.911387054  | -3.820940440 |
| N418  | 4.370109555  | -6.289436166  | -3.128246709 |
| N419  | 4.120483611  | -7.281547150  | -5.085985462 |

|      |              |               |              |
|------|--------------|---------------|--------------|
| N420 | 8.791231483  | -8.391879307  | -0.688374489 |
| N421 | 0.584807176  | 1.775012906   | 0.436084114  |
| N422 | 1.352174666  | 1.195529305   | -0.167027197 |
| O423 | -7.214863229 | -4.315077059  | 0.664766700  |
| O424 | -8.452469434 | -1.830048457  | 3.042883633  |
| O425 | -7.592024283 | -4.139178056  | 5.807115399  |
| O426 | -4.092886109 | -3.896440435  | 4.714430211  |
| O427 | -3.835231353 | -0.327469334  | 4.512264261  |
| O428 | -5.175776719 | -0.007219017  | 7.879915643  |
| O429 | -3.740960624 | -3.262167522  | 9.861363585  |
| O430 | 0.023699187  | -3.957967282  | 7.286124775  |
| O431 | 0.686491038  | 0.216865056   | 7.087277402  |
| O432 | -0.927756317 | 2.380497692   | 9.505475971  |
| O433 | -1.513046861 | 0.674027490   | 12.547277440 |
| O434 | 5.288622973  | -10.509203841 | 4.178736034  |
| O435 | 6.111471597  | -7.543645343  | 7.680682905  |
| O436 | 10.226165297 | -5.039208421  | 6.960878614  |
| O437 | -5.452443109 | -0.130896664  | -0.899035032 |
| O438 | -3.378743810 | -4.430880771  | -4.109936478 |
| O439 | -7.238139283 | 3.239447064   | -2.720980452 |
| O440 | -5.295652028 | 3.435660552   | -4.580146555 |
| O441 | -9.853743433 | 2.258198639   | 0.533297393  |
| O442 | -6.216546721 | 2.718842715   | 3.243896002  |
| O443 | -4.272745595 | 5.753253353   | 2.537443282  |
| O444 | -6.811262177 | 8.187414235   | 3.361935692  |
| O445 | 9.082925606  | -1.036653034  | 6.505733519  |
| O446 | 3.246169595  | 4.964908331   | 4.292211077  |
| O447 | 4.679335899  | 8.228417103   | -0.616559870 |
| O448 | 2.658669944  | 9.337978753   | -3.998776764 |
| O449 | -0.226870187 | 6.908305200   | -2.471735767 |
| O450 | -0.077335140 | 7.977042031   | 1.455949618  |
| O451 | 2.684607048  | 5.828918057   | 1.559548244  |
| O452 | 1.870886141  | 12.141192440  | 1.286601623  |
| O453 | -1.265284465 | 14.116908087  | -0.860508204 |
| O454 | -1.767972162 | 11.622524078  | -3.268384181 |
| O455 | -3.998061368 | 14.244929345  | 1.840036028  |
| O456 | -4.252946943 | 7.271443633   | -2.985276100 |
| O457 | 2.797787001  | -5.282526407  | -8.024181975 |
| O458 | 1.108570959  | -1.439351362  | -8.376788894 |
| O459 | 3.465279895  | 2.970583928   | -8.067215709 |
| O460 | 8.052950822  | 2.594734175   | -7.686939369 |
| O461 | -3.604567690 | -3.022073574  | -9.345185127 |
| O462 | -0.891085580 | -6.898216625  | -5.587849847 |
| O463 | 1.158309170  | -6.241017679  | -6.173963969 |
| O464 | -2.286970560 | 1.890174424   | -8.985220189 |
| O465 | 9.845872612  | -6.486394409  | -1.310900624 |
| O466 | 12.097517587 | -8.252693481  | 0.699460211  |
| O467 | -0.765901195 | -6.155359630  | -0.058095088 |
| O468 | -0.677201894 | -8.141604215  | 0.937062424  |
| O469 | 4.170368352  | -11.374497294 | -1.353887688 |
| O470 | 2.083871060  | -11.091639733 | -2.168160122 |
| O471 | 4.590064883  | -6.183296023  | 0.024321592  |
| O472 | 4.085287208  | -7.815240087  | 1.492955261  |
| O473 | 2.252811674  | -6.255103645  | -1.173473322 |
| O474 | 7.965705219  | -7.178073239  | 3.110804049  |
| O475 | 6.526924233  | -5.128375237  | 1.780709158  |
| O476 | -3.216300661 | 4.938846948   | -3.618725184 |
| O477 | 6.935466556  | -11.194497913 | 0.027498011  |
| O478 | 6.374787549  | -9.199345933  | 2.010965872  |
| S479 | 4.655433367  | 4.645986666   | -1.727646594 |
| S480 | 2.857408269  | 1.631319793   | -2.839455001 |

|                       |                         |              |               |              |
|-----------------------|-------------------------|--------------|---------------|--------------|
|                       | S481                    | 2.249551047  | -3.531228691  | -2.922029352 |
|                       | S482                    | 4.145057238  | 1.380516964   | 0.472474447  |
|                       | S483                    | 0.042860196  | -1.961389095  | -0.902549431 |
|                       | S484                    | 4.807652585  | -1.286363827  | -4.744401410 |
|                       | S485                    | 3.072832342  | -3.527254810  | 0.591739940  |
|                       | S486                    | 6.335315895  | 1.111518342   | -2.237494373 |
|                       | S487                    | 5.801738411  | -3.808973518  | -1.928439486 |
|                       | S488                    | 6.237595026  | -1.436937154  | 0.903980832  |
| <b>5u(a)</b>          | bm12cnx2b262n2x47.car_7 |              |               |              |
| Fe( 139) 0.556 2.401  | C1                      | -7.867989450 | -4.908330350  | -1.491379980 |
| Fe( 140) 0.381 -1.564 | C2                      | -7.926000706 | -5.784715931  | -2.747260584 |
| Fe( 141) 0.557 2.745  | C3                      | -9.043039813 | -3.234192356  | -0.124322891 |
| Fe( 142) 0.548 -2.587 | C4                      | -8.864587376 | -3.849274691  | 1.260691324  |
| Fe( 143) 0.573 2.938  | C5                      | -9.176379805 | -5.780299732  | 2.717673009  |
| Fe( 144) 0.505 -2.263 | C6                      | -7.717303202 | -6.114407224  | 3.046765022  |
| Fe( 145) 0.391 1.022  | C7                      | -5.490644457 | -6.607713741  | 2.150350253  |
| <b>S=3/2</b>          | C8                      | -4.715108465 | -5.328956934  | 2.482073662  |
|                       | C9                      | -4.407986986 | -2.944421957  | 2.076017748  |
|                       | C10                     | -4.708684600 | -2.433824879  | 3.493018421  |
|                       | C11                     | -6.331119479 | -2.166422129  | 5.279546585  |
|                       | C12                     | -5.767588744 | -3.044191828  | 6.404811999  |
|                       | C13                     | -5.547225236 | -5.309411834  | 7.307439124  |
|                       | C14                     | -4.093141941 | -5.788658043  | 7.387094414  |
|                       | C15                     | -2.061197997 | -6.402983017  | 6.146446697  |
|                       | C16                     | -0.936749213 | -5.396487351  | 5.883353575  |
|                       | C17                     | -0.399323576 | -3.070954301  | 5.199210900  |
|                       | C18                     | -0.431068918 | -1.941019656  | 6.246546619  |
|                       | C19                     | -0.629508196 | -2.586922128  | 3.745397204  |
|                       | C20                     | 0.226785750  | -1.363876933  | 3.406317426  |
|                       | C21                     | -0.374050723 | -3.726016596  | 2.752207605  |
|                       | C22                     | -1.765134466 | -0.220172302  | 7.402064922  |
|                       | C23                     | -1.933605942 | -0.780640739  | 8.828015442  |
|                       | C24                     | -2.906497579 | 0.748033598   | 7.007475559  |
|                       | C25                     | -3.145205164 | 1.798822006   | 8.098062447  |
|                       | C26                     | -2.603511238 | 1.429701043   | 5.667210836  |
|                       | C27                     | -3.120085539 | -2.257233858  | 10.341157321 |
|                       | C28                     | -1.853654532 | -2.757487553  | 11.007171390 |
|                       | C29                     | 4.689652920  | -12.235986163 | 2.733027358  |
|                       | C30                     | 5.409791806  | -10.928450428 | 2.409211066  |
|                       | C31                     | 5.771414639  | -8.607194964  | 3.261466166  |
|                       | C32                     | 6.819801127  | -8.483385994  | 4.383135537  |
|                       | C33                     | 4.659166094  | -7.552697403  | 3.406517630  |
|                       | C34                     | 5.171214997  | -6.112705027  | 3.334780179  |
|                       | C35                     | 4.017088371  | -5.123976273  | 3.187274319  |
|                       | C36                     | 4.028670915  | -2.655713965  | 3.595217082  |
|                       | C37                     | 9.103684456  | -7.802067390  | 4.940534108  |
|                       | C38                     | 9.431939577  | -6.360959122  | 5.265492922  |
|                       | C39                     | -4.920473318 | -1.822320363  | -2.889597480 |
|                       | C40                     | -5.344042385 | -0.483676450  | -2.264219904 |
|                       | C41                     | -3.416291338 | -2.022726369  | -2.620027520 |
|                       | C42                     | -2.870083384 | -3.449289507  | -2.835307097 |
|                       | C43                     | -2.388263507 | -3.768070560  | -4.247277577 |
|                       | C44                     | -5.662531190 | 1.924166888   | -2.755351338 |
|                       | C45                     | -6.988055823 | 2.193282741   | -2.035759552 |
|                       | C46                     | -5.430578095 | 2.814839337   | -4.006225729 |
|                       | C47                     | -9.226439283 | 1.350733106   | -1.508261729 |
|                       | C48                     | -9.063902313 | 1.074499467   | -0.005508614 |
|                       | C49                     | -7.612731908 | 0.233923444   | 1.788408110  |
|                       | C50                     | -6.549992059 | 1.132461155   | 2.427695468  |
|                       | C51                     | -4.790722142 | 2.823815395   | 2.146399393  |



|      |              |              |              |
|------|--------------|--------------|--------------|
| C52  | -5.428732067 | 3.968241976  | 2.968230586  |
| C53  | -3.979484888 | 3.501225075  | 1.031256856  |
| C54  | -3.148122277 | 2.632606571  | 0.132964938  |
| C55  | -2.637401775 | 1.360226859  | 0.287491404  |
| C56  | -1.991202059 | 2.192107163  | -1.657219593 |
| C57  | -7.182106728 | 5.697451693  | 2.931360551  |
| C58  | -7.482081728 | 5.574761792  | 4.421994599  |
| C59  | -8.485633930 | 5.936874504  | 2.131927957  |
| C60  | -9.007911690 | 7.342995264  | 2.107227845  |
| C61  | -9.136724135 | 8.282151653  | 3.112020142  |
| C62  | -9.886929566 | 9.099139701  | 1.193653042  |
| C63  | 7.992153548  | 0.012084475  | 5.663736477  |
| C64  | 8.896923488  | -1.183969913 | 5.435152977  |
| C65  | 6.636189913  | -0.318052166 | 4.987491242  |
| C66  | 5.603482213  | 0.768943834  | 5.170047329  |
| C67  | 4.760616012  | 0.797732243  | 6.296226953  |
| C68  | 5.458471989  | 1.788006725  | 4.212863697  |
| C69  | 3.800580945  | 1.801401751  | 6.459432510  |
| C70  | 4.509559173  | 2.798961752  | 4.364974695  |
| C71  | 3.678278030  | 2.802407098  | 5.487331192  |
| C72  | 5.879998546  | 6.907954391  | 1.284086307  |
| C73  | 4.904078887  | 8.050296954  | 0.973668042  |
| C74  | 5.138117292  | 5.566897091  | 1.278568228  |
| C75  | 4.222689700  | 9.771963513  | -0.642008843 |
| C76  | 2.821606367  | 9.366984575  | -1.105340232 |
| C77  | 1.326425686  | 7.509454640  | -1.757154321 |
| C78  | 0.485452147  | 7.122881412  | -0.520929983 |
| C79  | 1.538551880  | 6.341335251  | -2.738411693 |
| C80  | 0.288799072  | 5.645117728  | -3.289166570 |
| C81  | -0.589400012 | 6.455637262  | -4.260077235 |
| C82  | -1.992596886 | 8.429435721  | -3.675486373 |
| C83  | 0.389105592  | 6.124883003  | 1.698868489  |
| C84  | 0.186895630  | 7.283330596  | 2.695176514  |
| C85  | 1.026523308  | 4.946104602  | 2.447313713  |
| C86  | 1.242627616  | 9.197268551  | 3.790296811  |
| C87  | 0.641237949  | 10.595505232 | 3.674849524  |
| C88  | -0.561971339 | 12.236718422 | 2.293397227  |
| C89  | -1.956573738 | 12.535328790 | 2.886759977  |
| C90  | -0.515271161 | 12.578471068 | 0.788198814  |
| C91  | -1.451852503 | 11.696506175 | -0.031000239 |
| C92  | -4.050386818 | 11.588382676 | 3.761851538  |
| C93  | -4.114686215 | 12.369400670 | 5.068159807  |
| C94  | -4.662076956 | 10.175515571 | 3.965638986  |
| C95  | -4.731445351 | 9.385620904  | 2.677874379  |
| C96  | -5.810840348 | 9.553365934  | 1.795287216  |
| C97  | -3.698522346 | 8.508337291  | 2.303388130  |
| C98  | -5.856082159 | 8.884391079  | 0.569456049  |
| C99  | -3.714369739 | 7.849697580  | 1.070020318  |
| C100 | -4.792704141 | 8.054027658  | 0.209879638  |
| C101 | 5.635013688  | -2.114159213 | -8.825223944 |
| C102 | 4.154840768  | -1.945593810 | -8.521082079 |
| C103 | 2.497653652  | -0.689028845 | -7.155769358 |
| C104 | 2.083218528  | 0.749451118  | -7.490142029 |
| C105 | 2.382200035  | 3.109484032  | -6.906069349 |
| C106 | 3.509717759  | 4.093744550  | -6.612030429 |
| C107 | 5.707557460  | 4.553390787  | -5.636758975 |
| C108 | 6.823375318  | 4.671881354  | -6.654524370 |
| C109 | -1.004678130 | -1.468502278 | -9.990203576 |
| C110 | -2.067888604 | -0.414340275 | -9.655008577 |
| C111 | -0.779831118 | -2.390300210 | -8.770338709 |
| C112 | -0.022616959 | -3.668710160 | -9.173571296 |

|       |               |              |              |
|-------|---------------|--------------|--------------|
| C113  | 0.435285719   | -4.432590637 | -7.951311386 |
| C114  | -2.571822787  | 1.722492466  | -8.574664375 |
| C115  | -1.998070459  | 3.100145347  | -8.842252560 |
| C116  | -3.131430583  | 1.514421400  | -7.146985886 |
| C117  | -2.048398504  | 1.238325122  | -6.134928566 |
| C118  | -1.312567035  | 2.280199353  | -5.545379747 |
| C119  | -1.702856606  | -0.087256901 | -5.823193369 |
| C120  | -0.240983462  | 1.992794970  | -4.692835447 |
| C121  | -0.633130065  | -0.372329280 | -4.969243651 |
| C122  | 0.107337986   | 0.670152275  | -4.403598053 |
| C123  | 8.503293551   | -5.536539322 | -4.245287473 |
| C124  | 9.471501893   | -5.933244664 | -3.117446185 |
| C125  | 7.087462189   | -6.101792704 | -4.037412907 |
| C126  | 6.037893146   | -5.613418923 | -4.991206219 |
| C127  | 5.943940448   | -5.896053451 | -6.339256681 |
| C128  | 4.159073264   | -4.752361032 | -5.700141155 |
| C129  | 10.353559177  | -7.624949496 | -1.606697214 |
| C130  | 11.790349514  | -7.310908459 | -1.958828203 |
| C131  | 0.467612942   | -6.820748441 | -1.323029585 |
| C132  | 1.868297441   | -6.636279364 | -0.805768679 |
| C133  | 2.950098100   | -6.647903022 | -1.957690666 |
| C134  | 2.861738506   | -7.984883478 | -2.749666891 |
| C135  | 4.001168946   | -8.140377230 | -3.769625749 |
| C136  | 4.103512125   | -9.519713875 | -4.356364432 |
| C137  | 4.343564057   | -6.633935270 | -1.254084164 |
| C138  | 4.042964031   | -0.390752510 | -1.659550835 |
| Fe139 | 4.420574770   | -1.313974333 | -3.381346227 |
| Fe140 | 2.742052722   | 0.759296361  | -0.643687005 |
| Fe141 | 5.396557235   | 0.468775827  | -0.426408741 |
| Fe142 | 4.464378778   | 1.189337213  | -2.754020349 |
| Fe143 | 4.266505534   | 3.015951916  | -0.824836421 |
| Fe144 | 5.062027663   | -1.975923520 | -0.955902332 |
| Fe145 | 2.547394195   | -1.752030557 | -1.588714101 |
| H146  | -6.186649772  | -6.796277211 | -2.422271095 |
| H147  | -6.040177662  | -5.590085997 | -3.511553606 |
| H148  | -9.732079617  | -4.158540242 | -1.923558418 |
| H149  | -8.393496611  | -5.211127871 | -3.562880819 |
| H150  | -8.623958041  | -6.610660273 | -2.519739806 |
| H151  | -8.260572654  | -2.469823098 | -0.230467629 |
| H152  | -9.800383894  | -5.579571803 | 0.666110060  |
| H153  | -10.018778930 | -2.729915769 | -0.153688767 |
| H154  | -9.757288998  | -6.712052411 | 2.699865531  |
| H155  | -7.269544651  | -6.208890225 | 1.045991229  |
| H156  | -9.550832484  | -5.156267713 | 3.540129302  |
| H157  | -3.316506233  | -3.029553063 | 1.996087532  |
| H158  | -5.714833960  | -4.283979664 | 1.004722411  |
| H159  | -5.096369661  | -7.047738286 | 1.223703512  |
| H160  | -5.960716621  | -1.146626876 | 5.442408423  |
| H161  | -6.696014832  | -2.997920980 | 3.327878339  |
| H162  | -5.310549444  | -7.311060723 | 2.972470847  |
| H163  | -4.748729639  | -2.205024065 | 1.336568154  |
| H164  | -6.365899341  | -4.761667191 | 5.413672438  |
| H165  | -7.427324756  | -2.155000178 | 5.355993034  |
| H166  | -1.010066452  | -4.598586862 | 2.958242701  |
| H167  | -0.580990405  | -3.390756425 | 1.724592579  |
| H168  | 0.679481178   | -4.046393175 | 2.782871161  |
| H169  | -1.688498086  | -2.291934590 | 3.668705786  |
| H170  | -6.184182217  | -6.200431262 | 7.206479294  |
| H171  | -2.477958676  | 0.706613894  | 4.848860822  |
| H172  | -3.518469062  | -2.013297635 | 8.259191079  |
| H173  | -3.451338411  | 1.348501041  | 9.053606798  |

|      |               |              |               |
|------|---------------|--------------|---------------|
| H174 | -0.009425788  | -1.005590216 | 2.394771526   |
| H175 | 1.298730670   | -1.608784740 | 3.416031970   |
| H176 | 7.815631517   | 0.093110995  | 6.753269188   |
| H177 | -3.426037244  | 2.107789488  | 5.395678519   |
| H178 | -3.939796423  | 2.488625171  | 7.778536207   |
| H179 | -1.681183110  | 2.028442516  | 5.740069699   |
| H180 | -2.234145376  | 2.391641689  | 8.277601946   |
| H181 | -3.830126353  | 0.151613629  | 6.896738272   |
| H182 | -0.816233546  | 0.335241060  | 7.433074228   |
| H183 | -2.403064864  | -1.493438177 | 5.790963097   |
| H184 | 0.057762647   | -0.526548869 | 4.100095912   |
| H185 | 1.293084303   | 4.161690295  | 1.717905127   |
| H186 | 0.263511657   | 4.541050782  | 3.129932239   |
| H187 | 2.279550394   | 4.807600298  | 3.957989237   |
| H188 | 2.170429908   | 3.668311792  | 6.351852642   |
| H189 | 4.385016948   | 3.558770880  | 3.592964170   |
| H190 | 6.070964829   | 1.771706795  | 3.308494363   |
| H191 | 4.846843781   | 0.018729560  | 7.058232356   |
| H192 | -2.328611010  | -3.964614180 | 5.474318775   |
| H193 | -2.002771813  | -7.161728859 | 5.351704870   |
| H194 | -1.840894027  | -6.894222824 | 7.102747250   |
| H195 | -3.883860411  | -5.677968294 | 5.321888640   |
| H196 | -5.768136121  | -4.838480360 | 8.273934461   |
| H197 | 3.139681302   | 1.797708025  | 7.330879704   |
| H198 | 0.604463087   | -3.507409259 | 5.284474708   |
| H199 | -3.595197235  | -1.510060787 | 10.998277371  |
| H200 | -3.803467928  | -3.116796124 | 10.253246317  |
| H201 | -1.053920586  | -3.094242993 | 10.307823827  |
| H202 | 10.012049348  | -8.308042028 | 4.580346574   |
| H203 | -0.914189469  | -4.776880809 | -5.251356773  |
| H204 | 0.668532298   | -8.705703708 | -0.959879158  |
| H205 | -0.693105541  | -4.319090341 | -9.753139376  |
| H206 | 0.842031344   | -3.412585739 | -9.802935085  |
| H207 | -1.744581731  | -2.673643384 | -8.321788716  |
| H208 | -1.286390958  | 3.137132451  | -9.700911449  |
| H209 | -1.482712629  | -2.073303617 | -10.776337993 |
| H210 | -2.849994211  | -1.305154194 | -3.233464919  |
| H211 | -3.645072171  | -4.194342011 | -2.581398008  |
| H212 | -0.650373269  | 0.781080417  | -8.723823624  |
| H213 | -3.428012848  | 1.646549376  | -9.276191585  |
| H214 | 0.760596977   | -0.383790947 | -9.867641024  |
| H215 | -0.757760542  | -4.817135730 | -3.498069177  |
| H216 | -0.227902228  | -1.830662069 | -7.999717011  |
| H217 | 0.781954492   | -1.583880288 | -10.993738863 |
| H218 | -6.140347558  | -2.267774426 | -4.495675696  |
| H219 | -3.234381240  | -1.753258811 | -1.569598855  |
| H220 | 2.210875978   | -3.625842734 | -8.202763333  |
| H221 | -2.037732749  | -3.609168444 | -2.135214935  |
| H222 | -4.139303848  | 2.275609835  | 2.842527137   |
| H223 | -2.716024479  | 0.636397996  | 1.092523436   |
| H224 | -8.536907456  | 0.386027441  | 2.360064657   |
| H225 | -7.188092427  | 0.221669013  | -0.301523708  |
| H226 | -6.988355676  | 4.001888652  | 1.635265493   |
| H227 | -8.863150576  | 8.270583677  | 4.161340170   |
| H228 | -7.763536522  | 4.541501650  | 4.740290058   |
| H229 | -9.260210134  | 5.233589766  | 2.485684145   |
| H230 | -6.489441930  | 6.541699136  | 2.783748214   |
| H231 | -10.318655332 | 9.808360593  | 0.492196177   |
| H232 | -3.328493369  | 4.242534109  | 1.523527101   |
| H233 | -4.674340753  | 4.076771412  | 0.399468414   |
| H234 | -9.913305587  | 10.271502245 | 2.971103422   |

|      |              |              |               |
|------|--------------|--------------|---------------|
| H235 | -8.285769061 | 5.666511390  | 1.082918216   |
| H236 | -5.912154484 | 1.851830352  | 0.594191618   |
| H237 | -7.307246616 | -0.810949242 | 1.945380004   |
| H238 | -9.714163201 | 2.332317723  | -1.585653480  |
| H239 | -1.508522842 | 2.244645683  | -2.627844589  |
| H240 | -9.918922280 | 0.604908701  | -1.921649894  |
| H241 | 9.354341394  | 1.545225733  | 5.664583323   |
| H242 | 7.914322093  | 1.950185970  | 5.005170242   |
| H243 | 2.090740842  | 6.128508132  | 0.360333052   |
| H244 | -0.620050681 | 5.819462865  | 1.386253127   |
| H245 | 1.951077990  | 8.147349897  | 2.100797724   |
| H246 | -3.230913986 | 4.623605002  | -1.840419341  |
| H247 | -4.859429657 | 4.554562358  | -3.227637626  |
| H248 | -4.054107857 | 5.976625066  | -1.633148037  |
| H249 | -4.414598163 | 2.572381155  | -4.369539097  |
| H250 | -6.146435550 | 2.520634267  | -4.791277185  |
| H251 | 0.526416082  | 12.490642431 | 0.446277223   |
| H252 | -0.837299647 | 13.621779969 | 0.672338025   |
| H253 | 0.144861880  | 10.511274953 | -0.738848642  |
| H254 | -1.474238460 | 9.962776000  | -1.115454639  |
| H255 | -1.577684397 | 10.239836444 | -4.530252180  |
| H256 | -1.015779508 | 5.789331686  | -5.025528881  |
| H257 | -6.710257455 | 9.012961027  | -0.099657795  |
| H258 | -2.861044079 | 8.312547664  | 2.979671403   |
| H259 | -3.444934643 | 8.364104179  | -2.216519823  |
| H260 | 2.153682295  | 5.572659548  | -2.244173490  |
| H261 | 3.378843806  | 7.386206447  | -1.177609595  |
| H262 | -0.331823136 | 5.247352367  | -2.471260727  |
| H263 | -7.817781504 | 0.531492974  | -2.901437120  |
| H264 | 4.707919217  | 10.314799941 | -1.464312083  |
| H265 | -5.343485450 | 0.240304336  | -4.125818318  |
| H266 | 2.139319207  | 6.726136296  | -3.579347079  |
| H267 | -2.877772254 | 7.217975868  | 0.766138002   |
| H268 | 4.080713212  | 10.480803473 | 0.185740398   |
| H269 | -0.876036658 | 8.888128916  | -5.341117340  |
| H270 | -3.392374856 | 9.814321643  | -3.146230166  |
| H271 | -4.508530713 | -2.409603696 | -4.815806460  |
| H272 | -5.471145414 | -2.591041028 | -2.313362908  |
| H273 | -6.637593340 | 10.212452019 | 2.071088775   |
| H274 | -4.891452649 | 2.182959217  | -2.014902023  |
| H275 | 0.763522580  | 8.317474950  | -2.243090852  |
| H276 | 0.028937229  | 7.193440428  | -4.788475684  |
| H277 | 0.655562900  | 4.770548517  | -3.842884056  |
| H278 | -2.356939593 | 6.527599290  | -3.048946570  |
| H279 | 0.782714967  | 8.734301492  | 4.676418851   |
| H280 | -0.082513086 | 10.188924145 | 1.798194221   |
| H281 | 0.116103787  | 12.926380808 | 2.817202881   |
| H282 | 2.312279241  | 9.334251856  | 4.000363625   |
| H283 | -2.284124602 | 10.539474156 | 3.151473269   |
| H284 | 6.162771002  | -1.162836274 | -8.665035366  |
| H285 | 6.017604585  | -2.824130407 | -8.061814966  |
| H286 | 8.456113420  | -4.438776907 | -4.212072544  |
| H287 | 6.782064608  | -2.905228680 | -10.311916087 |
| H288 | 5.208164541  | -3.355946110 | -10.380383501 |
| H289 | 5.861910834  | 4.763475050  | 1.468784762   |
| H290 | 5.807311227  | 7.247722453  | 3.290126166   |
| H291 | 5.806368095  | 8.351957155  | -0.852384839  |
| H292 | 4.383277448  | 5.559725644  | 2.076340722   |
| H293 | 7.104164865  | 7.933846087  | 2.564100800   |
| H294 | 6.131543773  | 4.230394747  | -4.672824669  |
| H295 | 6.666891143  | 6.888980858  | 0.514132239   |

|      |              |               |              |
|------|--------------|---------------|--------------|
| H296 | 4.125066748  | -7.726122735  | 4.355760484  |
| H297 | 6.253079791  | -8.485874310  | 2.283358095  |
| H298 | 4.736923202  | 2.662002145   | -5.720682319 |
| H299 | 4.071804820  | -0.612121383  | 3.558713908  |
| H300 | 2.085874243  | 3.259239300   | -7.953319509 |
| H301 | -0.374287358 | -1.406498370  | -4.732368666 |
| H302 | 1.524945078  | 3.431416627   | -6.291303820 |
| H303 | 3.359660275  | -5.148961965  | 4.065729737  |
| H304 | 3.193928640  | 1.359079202   | -5.894369373 |
| H305 | 3.396274726  | -5.404406467  | 2.319888439  |
| H306 | 3.945128945  | -7.732568127  | 2.586368360  |
| H307 | 5.837859556  | -5.990640899  | 2.467760570  |
| H308 | 5.757029724  | -5.859251981  | 4.232496270  |
| H309 | -3.830080661 | 0.666024781   | -7.186497489 |
| H310 | 4.646134135  | -10.232485654 | 4.119277208  |
| H311 | 3.860328057  | -12.315778024 | 2.013687339  |
| H312 | 0.935096338  | 0.458725998   | -3.723612609 |
| H313 | 4.838221369  | -12.678694068 | 4.738190608  |
| H314 | 3.331116392  | -12.892835156 | 4.133375411  |
| H315 | 4.936076427  | -3.582717232  | 2.062765490  |
| H316 | 0.330421312  | 2.796375588   | -4.224534492 |
| H317 | -2.283630318 | -0.910682356  | -6.245269643 |
| H318 | 7.510167575  | -9.815253916  | -1.913826074 |
| H319 | 7.136770471  | -7.202256330  | -4.124303892 |
| H320 | 6.238902746  | -8.320829934  | -0.460034250 |
| H321 | 6.938643489  | -10.233122162 | -3.285116719 |
| H322 | 6.626348244  | 4.188638430   | -7.641672204 |
| H323 | 6.302282422  | -5.170361618  | -0.205599278 |
| H324 | 2.123212729  | -7.409301014  | -0.065255380 |
| H325 | 4.598340502  | -0.501780178  | -7.135632987 |
| H326 | 2.899166154  | -8.821157030  | -2.033450335 |
| H327 | 4.365914311  | -5.403310729  | -7.703393139 |
| H328 | 3.194849612  | -4.262529530  | -5.748910796 |
| H329 | 5.395356278  | -13.049835350 | 2.495845261  |
| H330 | 4.646748898  | -1.371620153  | 2.105301797  |
| H331 | 8.023710335  | -6.276563491  | 1.068889238  |
| H332 | 7.092173446  | -3.957054912  | 0.356534763  |
| H333 | 8.154806706  | -7.662456733  | 3.010836719  |
| H334 | 3.598810315  | -3.567654900  | 5.388309733  |
| H335 | 3.131846636  | -10.804633336 | -5.351526918 |
| H336 | 3.851060475  | -7.417950602  | -4.585473925 |
| H337 | 4.970818071  | -7.929430061  | -3.305192726 |
| H338 | 1.896121726  | -8.020739160  | -3.273934041 |
| H339 | 2.466961887  | -0.862357320  | -6.068591532 |
| H340 | -1.582543179 | 3.316369862   | -5.765623290 |
| H341 | -3.707824285 | 2.415042406   | -6.886831702 |
| H342 | 1.928866963  | -5.644860188  | -0.337261428 |
| H343 | 8.045357389  | -7.785083002  | 0.696414529  |
| H344 | 6.740805643  | -9.588122814  | 0.289263490  |
| H345 | 3.081967340  | -1.928808433  | 5.271942972  |
| H346 | 6.606424191  | -6.440413849  | -7.001710642 |
| H347 | 6.761428959  | -5.877109653  | -3.014221030 |
| H348 | 1.800221733  | -1.367017835  | -7.651916801 |
| H349 | 5.272786768  | 5.557059177   | -5.495994328 |
| H350 | 6.274683362  | -1.261321883  | 5.425236934  |
| H351 | 6.813887346  | -0.491993628  | 3.914164891  |
| H352 | 9.960168426  | -5.452540396  | -5.688291076 |
| H353 | 9.251810288  | -6.922925914  | -5.573381332 |
| H354 | 10.276155021 | -8.719131598  | -1.505588295 |
| H355 | 8.720173042  | -7.881363005  | -2.952087805 |
| H356 | 12.009335134 | -7.289472321  | -3.053252552 |

|       |              |               |               |
|-------|--------------|---------------|---------------|
| H357  | 10.100117462 | -7.178184101  | -0.631399920  |
| H358  | 9.407742465  | -1.186937850  | 4.442318006   |
| H359  | -3.169150578 | 12.375617980  | 5.659628398   |
| H360  | 8.795304008  | -8.282053268  | 5.885767908   |
| H361  | 8.587007626  | -5.639496809  | 5.150459755   |
| H362  | -4.650762540 | 12.134936870  | 3.015980532   |
| H363  | -4.061075067 | 9.633548989   | 4.713548449   |
| H364  | -5.668009470 | 10.312345455  | 4.388728262   |
| H365  | -5.633602432 | 7.529929374   | -1.467317926  |
| H366  | 2.238003394  | -0.862154316  | -0.283100625  |
| H367  | 0.034393014  | -1.540067539  | -0.229281473  |
| H368  | -1.351812157 | 0.262734434   | -1.065774283  |
| Mo369 | 4.056939516  | -3.900526519  | -2.555637775  |
| N370  | -6.664088462 | -6.339450412  | -3.203322622  |
| N371  | -8.995722660 | -4.191938824  | -1.222451310  |
| N372  | -9.347374141 | -5.103984374  | 1.442321285   |
| N373  | -6.920161133 | -6.396432192  | 1.985404972   |
| N374  | -5.046148623 | -4.219184116  | 1.774341415   |
| N375  | -5.973198732 | -2.619759125  | 3.944837356   |
| N376  | -5.880163600 | -4.387581571  | 6.232824656   |
| N377  | -3.409546763 | -5.864823876  | 6.210926512   |
| N378  | -1.329437108 | -4.137103214  | 5.562795775   |
| N379  | -1.619129950 | -1.293139764  | 6.415433403   |
| N380  | -2.871001190 | -1.747771303  | 9.004869465   |
| N381  | 4.148414503  | -12.281956411 | 4.096627249   |
| N382  | 5.197705735  | -9.945286507  | 3.303388778   |
| N383  | 4.491181014  | -3.750849747  | 2.969801263   |
| N384  | 3.422557051  | -2.760764668  | 4.799442696   |
| N385  | 4.122411506  | -1.460986013  | 2.998677193   |
| N386  | 8.007208458  | -7.949878962  | 4.003104610   |
| N387  | -5.224820785 | -1.844507646  | -4.325907725  |
| N388  | -1.278174440 | -4.529575771  | -4.328234446  |
| N389  | -5.494297520 | 0.529745273   | -3.149184610  |
| N390  | -8.004603422 | 1.322298529   | -2.289888027  |
| N391  | -7.912764922 | 0.463496364   | 0.387411109   |
| N392  | -5.800020031 | 1.918599658   | 1.604164801   |
| N393  | -2.733702132 | 3.141661047   | -1.092024740  |
| N394  | -1.916965581 | 1.098205186   | -0.860908199  |
| N395  | -6.590154454 | 4.455367154   | 2.455059068   |
| N396  | -9.481798138 | 7.866369908   | 0.913136737   |
| N397  | -9.694299977 | 9.391661921   | 2.511225578   |
| N398  | 8.605978943  | 1.197266503   | 5.059994065   |
| N399  | 6.535270991  | 7.083320257   | 2.587498546   |
| N400  | 5.086679076  | 8.688243240   | -0.217876244  |
| N401  | 2.628866564  | 8.061282556   | -1.388555808  |
| N402  | -1.709666384 | 7.133973971   | -3.596968468  |
| N403  | -1.329004235 | 9.256268632   | -4.512356583  |
| N404  | -2.907878137 | 8.975083714   | -2.838121249  |
| N405  | 1.134050457  | 6.500823909   | 0.502242328   |
| N406  | 1.101803575  | 8.297035602   | 2.654356106   |
| N407  | -0.076607205 | 10.881999048  | 2.547948169   |
| N408  | -0.870148278 | 10.622750925  | -0.626028894  |
| N409  | -2.674803629 | 11.465982105  | 3.303821773   |
| N410  | 5.826288551  | -2.557497043  | -10.209468804 |
| N411  | 3.842368863  | -0.971538432  | -7.645648123  |
| N412  | 2.648358916  | 1.695398656   | -6.712132439  |
| N413  | 4.652646425  | 3.636026190   | -6.036780590  |
| N414  | 0.192719507  | -0.857450476  | -10.581167652 |
| N415  | -1.633243003 | 0.700733126   | -9.006209649  |
| N416  | 9.055790220  | -5.916545116  | -5.561008475  |
| N417  | 4.907582629  | -4.889522818  | -4.610253173  |

|      |              |               |              |
|------|--------------|---------------|--------------|
| N418 | 4.755494788  | -5.343650246  | -6.766650332 |
| N419 | 9.433642837  | -7.215191469  | -2.657430478 |
| N420 | 0.465064942  | 1.451536981   | 1.104611851  |
| N421 | 1.288474090  | 1.191523031   | 0.372669294  |
| O422 | -6.886910025 | -4.896204750  | -0.724682187 |
| O423 | -8.316396643 | -3.209734254  | 2.172063390  |
| O424 | -7.320837164 | -6.148697095  | 4.223398656  |
| O425 | -3.840931238 | -5.314002836  | 3.363766165  |
| O426 | -3.838234607 | -1.870313543  | 4.175843172  |
| O427 | -5.279083088 | -2.535398628  | 7.428438105  |
| O428 | -3.619807629 | -6.121326841  | 8.482668642  |
| O429 | 0.243736312  | -5.769947521  | 5.947442992  |
| O430 | 0.586948408  | -1.651882180  | 6.894624562  |
| O431 | -1.247415191 | -0.362249157  | 9.776189598  |
| O432 | -1.728845995 | -2.859319463  | 12.218524122 |
| O433 | 6.099907372  | -10.841344193 | 1.370995710  |
| O434 | 6.556306197  | -8.854477713  | 5.540841498  |
| O435 | 10.533032339 | -5.996281709  | 5.646317551  |
| O436 | -5.522718759 | -0.355184908  | -1.034436224 |
| O437 | -2.993145917 | -3.372288427  | -5.269746477 |
| O438 | -7.101799701 | 3.126912291   | -1.226793770 |
| O439 | -5.601525878 | 4.197665879   | -3.780930265 |
| O440 | -9.983649606 | 1.385870009   | 0.766238418  |
| O441 | -6.402463897 | 1.125397096   | 3.657068544  |
| O442 | -4.868870992 | 4.460847761   | 3.954737501  |
| O443 | -7.480099840 | 6.511692878   | 5.204143947  |
| O444 | 9.054449135  | -2.094259525  | 6.237010782  |
| O445 | 2.742411515  | 3.814702129   | 5.576164445  |
| O446 | 4.007431222  | 8.390603271   | 1.767374979  |
| O447 | 1.948925458  | 10.251232410  | -1.227253710 |
| O448 | -0.725285837 | 7.397963588   | -0.482745974 |
| O449 | -0.750526125 | 7.250691355   | 3.504628403  |
| O450 | 2.177327637  | 5.388329207   | 3.176562575  |
| O451 | 0.803128588  | 11.408055430  | 4.594604313  |
| O452 | -2.365668312 | 13.701642987  | 2.980411638  |
| O453 | -2.673097828 | 11.915167722  | -0.078365290 |
| O454 | -5.130284529 | 12.913612442  | 5.471940764  |
| O455 | -4.763840057 | 7.415253777   | -1.037437530 |
| O456 | 3.308372763  | -2.709906780  | -9.051996780 |
| O457 | 1.300308117  | 1.007291370   | -8.431020963 |
| O458 | 3.325650569  | 5.291015214   | -6.888689743 |
| O459 | 7.870255593  | 5.257605986   | -6.429805261 |
| O460 | -3.263637743 | -0.592016362  | -9.944427557 |
| O461 | -0.299835981 | -5.153865970  | -7.285713514 |
| O462 | 1.721338409  | -4.253856783  | -7.584427192 |
| O463 | -2.304387235 | 4.113239501   | -8.230858922 |
| O464 | 10.332523054 | -5.138128421  | -2.696114453 |
| O465 | 12.678342294 | -7.175693125  | -1.129204622 |
| O466 | -0.262875983 | -5.939285746  | -1.745827457 |
| O467 | -0.011122965 | -8.109680071  | -1.327843080 |
| O468 | 5.084263020  | -10.256973257 | -4.287140651 |
| O469 | 2.973044143  | -9.899838180  | -5.007455325 |
| O470 | 5.098437708  | -5.622909314  | -1.538495289 |
| O471 | 4.682787371  | -7.580283662  | -0.506455219 |
| O472 | 2.779355813  | -5.552088526  | -2.780188958 |
| O473 | 8.462913279  | -7.129116958  | 1.314772444  |
| O474 | 6.896562572  | -4.898038756  | 0.539143003  |
| O475 | -3.628765214 | 5.424733177   | -2.328303235 |
| O476 | 7.774831682  | -10.227698075 | -2.774930586 |
| O477 | 7.052414436  | -8.887866669  | -0.342596748 |
| S478 | 4.247535487  | 5.261330325   | -0.311835502 |

|                       |                          |              |               |              |
|-----------------------|--------------------------|--------------|---------------|--------------|
|                       | S479                     | 2.655500274  | 2.451591132   | -2.230688477 |
|                       | S480                     | 2.558391282  | -2.496811981  | -3.751149673 |
|                       | S481                     | 4.059067289  | 1.633453241   | 0.990963997  |
|                       | S482                     | 0.259443351  | -1.840803451  | -1.538460412 |
|                       | S483                     | 4.921223116  | 0.357226021   | -4.785301757 |
|                       | S484                     | 3.414596981  | -3.342303374  | -0.330651943 |
|                       | S485                     | 6.204704673  | 2.165183223   | -1.747652791 |
|                       | S486                     | 6.101233781  | -2.698347386  | -2.771876228 |
|                       | S487                     | 6.401378176  | -1.229933913  | 0.616461593  |
| <b>5u(b)</b>          | bm12cnx2b262n2x35a.car_6 |              |               |              |
| Fe( 139) 0.550 -2.278 | C1                       | -7.864254637 | -4.927869384  | -1.552435723 |
| Fe( 140) 0.361 -1.118 | C2                       | -7.941139920 | -5.751923877  | -2.841732252 |
| Fe( 141) 0.502 -1.967 | C3                       | -9.012722677 | -3.312656271  | -0.097526786 |
| Fe( 142) 0.574 2.903  | C4                       | -8.805752382 | -3.979918774  | 1.259570486  |
| Fe( 143) 0.566 2.919  | C5                       | -9.070256227 | -5.975311221  | 2.639878505  |
| Fe( 144) 0.513 2.367  | C6                       | -7.603666707 | -6.322373495  | 2.919302783  |
| Fe( 145) 0.401 -0.856 | C7                       | -5.392913926 | -6.742178011  | 1.945170442  |
| <b>S=3/2</b>          | C8                       | -4.616866381 | -5.478626019  | 2.328635201  |
|                       | C9                       | -4.329743019 | -3.074437168  | 2.049306846  |
|                       | C10                      | -4.611539334 | -2.645756294  | 3.496715378  |
|                       | C11                      | -6.199312908 | -2.490202408  | 5.324352550  |
|                       | C12                      | -5.599726384 | -3.420861471  | 6.387526227  |
|                       | C13                      | -5.347965426 | -5.726743101  | 7.172331583  |
|                       | C14                      | -3.884335572 | -6.184180880  | 7.188229124  |
|                       | C15                      | -1.886419572 | -6.708775660  | 5.852670521  |
|                       | C16                      | -0.772331564 | -5.685761648  | 5.612718543  |
|                       | C17                      | -0.259000994 | -3.321566603  | 5.060877902  |
|                       | C18                      | -0.271559330 | -2.236412399  | 6.154428183  |
|                       | C19                      | -0.521631128 | -2.768578990  | 3.634870888  |
|                       | C20                      | 0.329792057  | -1.531613324  | 3.332143279  |
|                       | C21                      | -0.290526914 | -3.860685114  | 2.584539896  |
|                       | C22                      | -1.600712635 | -0.587268660  | 7.416635179  |
|                       | C23                      | -1.733990296 | -1.210557771  | 8.819521670  |
|                       | C24                      | -2.756008982 | 0.387120305   | 7.085372599  |
|                       | C25                      | -2.980079412 | 1.388468518   | 8.225302930  |
|                       | C26                      | -2.482146891 | 1.127981529   | 5.770518104  |
|                       | C27                      | -2.875258574 | -2.765368214  | 10.290687315 |
|                       | C28                      | -1.591260815 | -3.304211998  | 10.889232925 |
|                       | C29                      | 4.840805295  | -12.322061706 | 2.049348232  |
|                       | C30                      | 5.537308533  | -10.991318231 | 1.769447687  |
|                       | C31                      | 5.930974517  | -8.720476892  | 2.733516925  |
|                       | C32                      | 7.000765573  | -8.626381760  | 3.836886759  |
|                       | C33                      | 4.809958202  | -7.686348763  | 2.943466075  |
|                       | C34                      | 5.308341448  | -6.239255371  | 2.933124061  |
|                       | C35                      | 4.148634031  | -5.250358110  | 2.838731178  |
|                       | C36                      | 4.160621610  | -2.800989278  | 3.354914572  |
|                       | C37                      | 9.288571799  | -7.935562214  | 4.371380265  |
|                       | C38                      | 9.605603365  | -6.501406874  | 4.737734127  |
|                       | C39                      | -4.976412961 | -1.736433771  | -2.881611705 |
|                       | C40                      | -5.398165696 | -0.438054857  | -2.177331040 |
|                       | C41                      | -3.461683009 | -1.924389178  | -2.658899971 |
|                       | C42                      | -2.903108832 | -3.334107297  | -2.936510931 |
|                       | C43                      | -2.457015961 | -3.590604490  | -4.372295045 |
|                       | C44                      | -5.716092492 | 1.992368854   | -2.529168142 |
|                       | C45                      | -7.014601862 | 2.221741624   | -1.751263332 |
|                       | C46                      | -5.542935512 | 2.955702335   | -3.736892833 |
|                       | C47                      | -9.254662509 | 1.367980102   | -1.227963917 |
|                       | C48                      | -9.068803849 | 0.995639862   | 0.251273575  |
|                       | C49                      | -7.575475041 | 0.069678473   | 1.966426088  |
|                       | C50                      | -6.499444753 | 0.941002505   | 2.622990226  |



|      |              |              |               |
|------|--------------|--------------|---------------|
| C51  | -4.774925243 | 2.673804736  | 2.385383865   |
| C52  | -5.402477956 | 3.765673517  | 3.276121169   |
| C53  | -3.993343355 | 3.413178200  | 1.286583370   |
| C54  | -3.186353410 | 2.596098882  | 0.322846562   |
| C55  | -2.684736746 | 1.313026321  | 0.388698876   |
| C56  | -2.046170790 | 2.268600275  | -1.499232778  |
| C57  | -7.161084416 | 5.486325217  | 3.349698676   |
| C58  | -7.406749850 | 5.296916886  | 4.843587040   |
| C59  | -8.495686466 | 5.743945581  | 2.609667037   |
| C60  | -9.026607099 | 7.146242236  | 2.664892342   |
| C61  | -9.116552529 | 8.040706657  | 3.713869429   |
| C62  | -9.943715555 | 8.936428556  | 1.862833132   |
| C63  | 8.117317717  | -0.184795668 | 5.472310595   |
| C64  | 9.024254890  | -1.368223319 | 5.192000798   |
| C65  | 6.748113481  | -0.505044706 | 4.819655253   |
| C66  | 5.711549478  | 0.565291501  | 5.067325687   |
| C67  | 4.887342047  | 0.539955088  | 6.207006293   |
| C68  | 5.548182654  | 1.628083900  | 4.160814979   |
| C69  | 3.925887701  | 1.529944088  | 6.430043975   |
| C70  | 4.597672327  | 2.626353326  | 4.372964636   |
| C71  | 3.783576319  | 2.573708268  | 5.506467942   |
| C72  | 5.840300313  | 6.899212413  | 1.496859504   |
| C73  | 4.853065447  | 8.046903142  | 1.252276709   |
| C74  | 5.098291213  | 5.556048224  | 1.450293432   |
| C75  | 4.128944549  | 9.820143601  | -0.287469182  |
| C76  | 2.717603448  | 9.422646947  | -0.726676262  |
| C77  | 1.221553651  | 7.584670185  | -1.426035446  |
| C78  | 0.406694164  | 7.139849827  | -0.193541459  |
| C79  | 1.419985019  | 6.458535622  | -2.456564562  |
| C80  | 0.163143026  | 5.787342503  | -3.021544292  |
| C81  | -0.734049727 | 6.642087109  | -3.932859728  |
| C82  | -2.138495948 | 8.573765876  | -3.225649271  |
| C83  | 0.360218528  | 6.044126314  | 1.983543863   |
| C84  | 0.176520752  | 7.144673956  | 3.045773262   |
| C85  | 1.016862011  | 4.830733733  | 2.655000074   |
| C86  | 1.242562694  | 9.015753194  | 4.206034806   |
| C87  | 0.646183017  | 10.419684594 | 4.157117195   |
| C88  | -0.609129739 | 12.104475814 | 2.879658012   |
| C89  | -1.991948166 | 12.358508440 | 3.516497535   |
| C90  | -0.602858101 | 12.514741323 | 1.391065665   |
| C91  | -1.551200372 | 11.659686832 | 0.557623038   |
| C92  | -4.053153897 | 11.351502702 | 4.395051313   |
| C93  | -4.099598539 | 12.066133940 | 5.739156788   |
| C94  | -4.659954740 | 9.928377947  | 4.538401831   |
| C95  | -4.752887817 | 9.204449596  | 3.214573676   |
| C96  | -5.847359695 | 9.419376325  | 2.361322510   |
| C97  | -3.732465674 | 8.342523882  | 2.778922056   |
| C98  | -5.919550527 | 8.811889922  | 1.104981310   |
| C99  | -3.774903155 | 7.745099563  | 1.514774641   |
| C100 | -4.868707935 | 7.993180242  | 0.686576748   |
| C101 | 5.451635901  | -1.613896417 | -9.048033632  |
| C102 | 3.978520502  | -1.486518284 | -8.694358071  |
| C103 | 2.348147740  | -0.330307994 | -7.213241087  |
| C104 | 1.910472601  | 1.114279065  | -7.482002857  |
| C105 | 2.193796097  | 3.450289399  | -6.807295387  |
| C106 | 3.314692914  | 4.432655446  | -6.482533566  |
| C107 | 5.530067072  | 4.858641019  | -5.532810523  |
| C108 | 6.630982511  | 5.008444916  | -6.563350432  |
| C109 | -1.202962187 | -0.997900631 | -10.042860539 |
| C110 | -2.269817178 | 0.026840262  | -9.636908775  |
| C111 | -0.954969698 | -1.979010575 | -8.875221587  |

|       |              |              |              |
|-------|--------------|--------------|--------------|
| C112  | -0.200089327 | -3.233513873 | -9.351961447 |
| C113  | 0.295759897  | -4.036954177 | -8.170703853 |
| C114  | -2.775548580 | 2.097240629  | -8.433563351 |
| C115  | -2.225660924 | 3.495294228  | -8.639635433 |
| C116  | -3.301241159 | 1.811334018  | -7.006199731 |
| C117  | -2.192338632 | 1.508442134  | -6.031786453 |
| C118  | -1.475085707 | 2.533459903  | -5.394476987 |
| C119  | -1.804321446 | 0.175971356  | -5.806125581 |
| C120  | -0.377338226 | 2.226150166  | -4.584181478 |
| C121  | -0.707281728 | -0.129013824 | -4.995084168 |
| C122  | 0.016371046  | 0.899090759  | -4.384960213 |
| C123  | 8.459515211  | -5.247494512 | -4.692845070 |
| C124  | 9.460717108  | -5.694989039 | -3.614012686 |
| C125  | 7.050344839  | -5.822287219 | -4.472323757 |
| C126  | 5.976579547  | -5.303089704 | -5.381924675 |
| C127  | 5.849906778  | -5.524169931 | -6.739342035 |
| C128  | 4.069116628  | -4.434275534 | -6.000620595 |
| C129  | 10.384143026 | -7.447659169 | -2.202839221 |
| C130  | 11.811118269 | -7.114225454 | -2.582129618 |
| C131  | 0.505409002  | -6.715396697 | -1.649315214 |
| C132  | 1.914861336  | -6.548157483 | -1.147358188 |
| C133  | 2.977446765  | -6.495886959 | -2.315855118 |
| C134  | 2.880765466  | -7.797508103 | -3.165124022 |
| C135  | 4.005023265  | -7.912313990 | -4.206980351 |
| C136  | 4.077591148  | -9.251746108 | -4.884284798 |
| C137  | 4.381503964  | -6.499612846 | -1.638635341 |
| C138  | 4.000076736  | -0.291204666 | -1.768262855 |
| Fe139 | 4.369585171  | -1.073973334 | -3.529383746 |
| Fe140 | 2.697284348  | 0.824260812  | -0.603336771 |
| Fe141 | 5.264091762  | 0.563272850  | -0.496683793 |
| Fe142 | 4.323819341  | 1.395267001  | -2.769257316 |
| Fe143 | 4.265230229  | 3.035654931  | -0.651272575 |
| Fe144 | 5.093097776  | -1.863030246 | -1.167983559 |
| Fe145 | 2.487060150  | -1.572086653 | -1.746794545 |
| H146  | -6.177762052 | -6.743662689 | -2.592061834 |
| H147  | -6.079817669 | -5.497297356 | -3.641233761 |
| H148  | -9.738887791 | -4.166924868 | -1.915399283 |
| H149  | -8.429773797 | -5.149529008 | -3.623694190 |
| H150  | -8.625794085 | -6.593607740 | -2.637217099 |
| H151  | -8.231938795 | -2.545345314 | -0.190621008 |
| H152  | -9.737304362 | -5.693419698 | 0.611736748  |
| H153  | -9.988419092 | -2.807482912 | -0.087850640 |
| H154  | -9.651109958 | -6.905953135 | 2.598487844  |
| H155  | -7.195152176 | -6.280782103 | 0.909163186  |
| H156  | -9.426446501 | -5.384397371 | 3.494176664  |
| H157  | -3.239134786 | -3.149448209 | 1.949445257  |
| H158  | -5.648309385 | -4.359968247 | 0.928508752  |
| H159  | -5.020064863 | -7.124416461 | 0.984939485  |
| H160  | -5.836238912 | -1.476193069 | 5.532059809  |
| H161  | -6.598014965 | -3.216067875 | 3.337363362  |
| H162  | -5.189792553 | -7.489819650 | 2.720840405  |
| H163  | -4.685355235 | -2.298845877 | 1.355791760  |
| H164  | -6.234173117 | -5.090379369 | 5.336772788  |
| H165  | -7.293390921 | -2.498185698 | 5.427048552  |
| H166  | -0.932948414 | -4.735719391 | 2.756599048  |
| H167  | -0.504402047 | -3.473257735 | 1.576844298  |
| H168  | 0.760208390  | -4.191997779 | 2.589720785  |
| H169  | -1.581301989 | -2.468378511 | 3.598386368  |
| H170  | -5.971565856 | -6.621512255 | 7.033560164  |
| H171  | -2.371484022 | 0.439882889  | 4.920591474  |
| H172  | -3.324822604 | -2.428040569 | 8.232132833  |

|      |               |              |               |
|------|---------------|--------------|---------------|
| H173 | -3.257950867  | 0.895589241  | 9.168634200   |
| H174 | 0.064638974   | -1.123893679 | 2.346818070   |
| H175 | 1.400384714   | -1.779309232 | 3.303973814   |
| H176 | 7.966943546   | -0.134535553 | 6.568100696   |
| H177 | -3.311808464  | 1.814575036  | 5.546372770   |
| H178 | -3.789736182  | 2.083007528  | 7.956432969   |
| H179 | -1.559916260  | 1.725878466  | 5.851110299   |
| H180 | -2.070900201  | 1.983333560  | 8.407823475   |
| H181 | -3.678198618  | -0.210201881 | 6.965334102   |
| H182 | -0.656344642  | -0.024715873 | 7.452642434   |
| H183 | -2.263070077  | -1.804834877 | 5.773872652   |
| H184 | 0.180660013   | -0.727455679 | 4.068295343   |
| H185 | 1.264369227   | 4.086865062  | 1.878502564   |
| H186 | 0.272175179   | 4.389885380  | 3.335740190   |
| H187 | 2.320467917   | 4.618120105  | 4.113843696   |
| H188 | 2.281748254   | 3.383272333  | 6.432650222   |
| H189 | 4.461659476   | 3.426364439  | 3.644161320   |
| H190 | 6.149147145   | 1.656839950  | 3.249225253   |
| H191 | 4.989936754   | -0.272597962 | 6.931812092   |
| H192 | -2.177619818  | -4.235517060 | 5.349244269   |
| H193 | -1.854934583  | -7.416642572 | 5.010888518   |
| H194 | -1.631425389  | -7.257948597 | 6.767789309   |
| H195 | -3.735989516  | -5.953335407 | 5.129130822   |
| H196 | -5.552760839  | -5.314225318 | 8.168741653   |
| H197 | 3.279865797   | 1.484793943  | 7.311246189   |
| H198 | 0.747597440   | -3.757946867 | 5.099069873   |
| H199 | -3.328674249  | -2.055810726 | 11.001780106  |
| H200 | -3.565127789  | -3.616577029 | 10.174274193  |
| H201 | -0.821095845  | -3.622448796 | 10.148321083  |
| H202 | 10.194372815  | -8.417424817 | 3.972603836   |
| H203 | -0.976311556  | -4.510327577 | -5.453616500  |
| H204 | 0.722762034   | -8.614910289 | -1.397073859  |
| H205 | -0.881001726  | -3.865265551 | -9.940168490  |
| H206 | 0.646015424   | -2.943196208 | -9.991775369  |
| H207 | -1.911457356  | -2.288233617 | -8.425847561  |
| H208 | -1.506168688  | 3.586631950  | -9.488339927  |
| H209 | -1.686861307  | -1.567023873 | -10.851503397 |
| H210 | -2.922718301  | -1.177414120 | -3.262746541  |
| H211 | -3.661342772  | -4.098187559 | -2.691057087  |
| H212 | -0.847895475  | 1.187022222  | -8.670191964  |
| H213 | -3.646044204  | 2.047486427  | -9.117814149  |
| H214 | 0.554787838   | 0.095752087  | -9.892122499  |
| H215 | -0.774394603  | -4.607937534 | -3.706770331  |
| H216 | -0.389440481  | -1.459874196 | -8.086361873  |
| H217 | 0.569559438   | -1.047198107 | -11.076180620 |
| H218 | -6.239592531  | -2.089698632 | -4.474641449  |
| H219 | -3.256074766  | -1.687648477 | -1.605246217  |
| H220 | 2.054925515   | -3.195574063 | -8.428986416  |
| H221 | -2.052802484  | -3.508942107 | -2.263138814  |
| H222 | -4.099177192  | 2.097393301  | 3.032088742   |
| H223 | -2.761958788  | 0.540778854  | 1.145936593   |
| H224 | -8.485887020  | 0.185496745  | 2.568309770   |
| H225 | -7.199584578  | 0.165988870  | -0.130371415  |
| H226 | -6.981011924  | 3.861442435  | 1.964787172   |
| H227 | -8.805804447  | 7.985182757  | 4.750980763   |
| H228 | -7.688850883  | 4.252872073  | 5.124313666   |
| H229 | -9.251323114  | 5.019627179  | 2.962901895   |
| H230 | -6.479526391  | 6.341958717  | 3.210276537   |
| H231 | -10.403452893 | 9.674647963  | 1.209910534   |
| H232 | -3.328381031  | 4.126407129  | 1.802315984   |
| H233 | -4.704099567  | 4.023528408  | 0.705804423   |

|      |              |              |               |
|------|--------------|--------------|---------------|
| H234 | -9.902153901 | 10.030697922 | 3.689229269   |
| H235 | -8.332029821 | 5.518083138  | 1.544407002   |
| H236 | -5.971059674 | 1.816168930  | 0.821849668   |
| H237 | -7.257455624 | -0.978849314 | 2.062891026   |
| H238 | -9.737167587 | 2.355432402  | -1.234073803  |
| H239 | -1.569026060 | 2.386586156  | -2.465894499  |
| H240 | -9.957680600 | 0.651987095  | -1.675339608  |
| H241 | 9.474172910  | 1.352303258  | 5.474730655   |
| H242 | 8.010031345  | 1.771762114  | 4.880412113   |
| H243 | 2.037810541  | 6.130575139  | 0.617564793   |
| H244 | -0.654495953 | 5.751963501  | 1.675932524   |
| H245 | 1.909951381  | 8.062521969  | 2.443038771   |
| H246 | -3.306024103 | 4.678546229  | -1.528684703  |
| H247 | -4.958906011 | 4.664908707  | -2.892898259  |
| H248 | -4.145317852 | 6.017605244  | -1.263269072  |
| H249 | -4.541575764 | 2.749539302  | -4.159958904  |
| H250 | -6.288244819 | 2.693439715  | -4.505093269  |
| H251 | 0.430779251  | 12.452373037 | 1.021202509   |
| H252 | -0.936158742 | 13.558830010 | 1.333085525   |
| H253 | 0.037580227  | 10.520754013 | -0.234006969  |
| H254 | -1.582808764 | 9.969047439  | -0.593254194  |
| H255 | -1.751917186 | 10.429114845 | -3.997103570  |
| H256 | -1.169683889 | 6.012667359  | -4.723352613  |
| H257 | -6.786233686 | 8.976010281  | 0.460301077   |
| H258 | -2.882595302 | 8.112530045  | 3.428069609   |
| H259 | -3.569652024 | 8.424209806  | -1.751817064  |
| H260 | 2.038441120  | 5.669081468  | -2.000138955  |
| H261 | 3.288198820  | 7.451044369  | -0.896883104  |
| H262 | -0.441518267 | 5.338347508  | -2.218416206  |
| H263 | -7.890084625 | 0.641791070  | -2.714032391  |
| H264 | 4.593470828  | 10.384846554 | -1.107114024  |
| H265 | -5.414376380 | 0.387488526  | -3.996356749  |
| H266 | 2.009155835  | 6.878431089  | -3.289041215  |
| H267 | -2.946475211 | 7.125218339  | 1.166639561   |
| H268 | 4.004092828  | 10.504617900 | 0.563368309   |
| H269 | -1.046482157 | 9.127037338  | -4.878569589  |
| H270 | -3.540255418 | 9.920935414  | -2.608204334  |
| H271 | -4.619026763 | -2.239208120 | -4.840803882  |
| H272 | -5.498520944 | -2.542465946 | -2.331125458  |
| H273 | -6.667833835 | 10.064536740 | 2.684482836   |
| H274 | -4.916659139 | 2.213175635  | -1.806163010  |
| H275 | 0.644003769  | 8.408502893  | -1.866235891  |
| H276 | -0.127233073 | 7.407431948  | -4.433980606  |
| H277 | 0.525726883  | 4.944668556  | -3.626256140  |
| H278 | -2.479400405 | 6.640266817  | -2.684830415  |
| H279 | 0.787957496  | 8.518688745  | 5.075998948   |
| H280 | -0.132585891 | 10.082679670 | 2.285952578   |
| H281 | 0.075325478  | 12.775601365 | 3.418692508   |
| H282 | 2.315201489  | 9.136081604  | 4.409643159   |
| H283 | -2.283232582 | 10.347735475 | 3.716830808   |
| H284 | 5.958450352  | -0.652083246 | -8.883617916  |
| H285 | 5.876853966  | -2.328845160 | -8.313287489  |
| H286 | 8.410118563  | -4.152211946 | -4.609590276  |
| H287 | 6.561421724  | -2.363724079 | -10.586352030 |
| H288 | 4.988142055  | -2.820610833 | -10.618153851 |
| H289 | 5.830436856  | 4.751844408  | 1.595165219   |
| H290 | 5.816669564  | 7.167042901  | 3.519648013   |
| H291 | 5.712756763  | 8.413409462  | -0.577987068  |
| H292 | 4.353764821  | 5.521506049  | 2.258634819   |
| H293 | 7.088504506  | 7.888894669  | 2.789822637   |
| H294 | 5.966189586  | 4.514228116  | -4.582676960  |

|      |              |               |              |
|------|--------------|---------------|--------------|
| H295 | 6.606868239  | 6.903714612   | 0.705947977  |
| H296 | 4.292029812  | -7.909602000  | 3.891054621  |
| H297 | 6.390574832  | -8.557322304  | 1.751000772  |
| H298 | 4.575643476  | 2.965629897   | -5.700195943 |
| H299 | 4.192360607  | -0.762445840  | 3.411729577  |
| H300 | 1.887662931  | 3.637837170   | -7.845363939 |
| H301 | -0.417066184 | -1.169066901  | -4.827678073 |
| H302 | 1.337424994  | 3.737569174   | -6.174043241 |
| H303 | 3.498439760  | -5.314599542  | 3.720802853  |
| H304 | 3.040399842  | 1.671071053   | -5.879746543 |
| H305 | 3.521711264  | -5.493692333  | 1.964447043  |
| H306 | 4.085832541  | -7.835120739  | 2.125948812  |
| H307 | 5.966698902  | -6.074919515  | 2.067435083  |
| H308 | 5.900763160  | -6.022823812  | 3.836598466  |
| H309 | -3.986583177 | 0.953506065   | -7.071335501 |
| H310 | 4.865778580  | -10.401926377 | 3.558637039  |
| H311 | 3.973338994  | -12.357716978 | 1.372175461  |
| H312 | 0.867427685  | 0.677699622   | -3.738835444 |
| H313 | 5.098886597  | -12.890388383 | 4.013311612  |
| H314 | 3.561647791  | -13.075187323 | 3.475768759  |
| H315 | 5.060618472  | -3.661096707  | 1.777658509  |
| H316 | 0.184417334  | 3.015707114   | -4.082332917 |
| H317 | -2.372437655 | -0.633415073  | -6.270432630 |
| H318 | 7.533190105  | -9.657688307  | -2.548003774 |
| H319 | 7.097135699  | -6.919073426  | -4.598454668 |
| H320 | 6.302842560  | -8.235194885  | -0.987974541 |
| H321 | 6.925829447  | -10.026526196 | -3.918430883 |
| H322 | 6.395320228  | 4.602507209   | -7.577093712 |
| H323 | 6.335262783  | -5.096162373  | -0.568491039 |
| H324 | 2.186738288  | -7.354003524  | -0.449203236 |
| H325 | 4.447479822  | -0.120401769  | -7.239675759 |
| H326 | 2.929928167  | -8.661927606  | -2.483570561 |
| H327 | 4.230750790  | -4.988387352  | -8.036326975 |
| H328 | 3.097532987  | -3.955229830  | -6.001585268 |
| H329 | 5.533283561  | -13.114367959 | 1.717468161  |
| H330 | 4.779700577  | -1.447279767  | 1.922340787  |
| H331 | 8.093939333  | -6.255121568  | 0.595463120  |
| H332 | 7.178531192  | -3.923763003  | 0.003731157  |
| H333 | 8.295077596  | -7.732802475  | 2.471155708  |
| H334 | 3.761517809  | -3.785677683  | 5.114984933  |
| H335 | 3.077757933  | -10.456520124 | -5.946387275 |
| H336 | 3.856479996  | -7.137671582  | -4.973268990 |
| H337 | 4.984055593  | -7.746110919  | -3.743474538 |
| H338 | 1.907428771  | -7.813169349  | -3.676628229 |
| H339 | 2.347778175  | -0.545633807  | -6.133239526 |
| H340 | -1.776205261 | 3.573569928   | -5.548538701 |
| H341 | -3.887183820 | 2.688293746   | -6.691924915 |
| H342 | 1.974634732  | -5.579724034  | -0.632031195 |
| H343 | 8.131158816  | -7.743775050  | 0.150272974  |
| H344 | 6.818095613  | -9.540087361  | -0.319140890 |
| H345 | 3.238186269  | -2.148583143  | 5.074871382  |
| H346 | 6.501393549  | -6.023735781  | -7.447720079 |
| H347 | 6.747222588  | -5.633526535  | -3.434602605 |
| H348 | 1.645853784  | -0.997139953  | -7.717396322 |
| H349 | 5.097397482  | 5.858712744   | -5.363625469 |
| H350 | 6.404752356  | -1.467484166  | 5.229062873  |
| H351 | 6.903855197  | -0.632963725  | 3.736330984  |
| H352 | 9.875975697  | -5.098751593  | -6.169281969 |
| H353 | 9.169031243  | -6.572324001  | -6.101894882 |
| H354 | 10.310374258 | -8.545464711  | -2.141998696 |
| H355 | 8.711847542  | -7.648553122  | -3.509143929 |

|       |              |               |               |
|-------|--------------|---------------|---------------|
| H356  | 12.003408868 | -7.066114530  | -3.681120970  |
| H357  | 10.163125799 | -7.040649951  | -1.203010440  |
| H358  | 9.511580687  | -1.347816380  | 4.187934716   |
| H359  | -3.139882503 | 12.062795113  | 6.307631449   |
| H360  | 9.006355135  | -8.451947690  | 5.305857230   |
| H361  | 8.740453804  | -5.796557502  | 4.688536673   |
| H362  | -4.666230129 | 11.934084029  | 3.688104320   |
| H363  | -4.049752097 | 9.350783753   | 5.250508317   |
| H364  | -5.658513522 | 10.048227379  | 4.983172078   |
| H365  | -5.744241822 | 7.540355647   | -0.995726744  |
| H366  | 2.262615505  | -0.802080611  | -0.341118659  |
| H367  | 0.095323328  | -1.434705807  | -0.281710085  |
| H368  | -1.393908900 | 0.310637184   | -1.037850246  |
| Mo369 | 4.046951477  | -3.707352696  | -2.820366558  |
| N370  | -6.681575348 | -6.270038648  | -3.346388071  |
| N371  | -8.987120649 | -4.225007425  | -1.233041669  |
| N372  | -9.274442718 | -5.245844519  | 1.398712129   |
| N373  | -6.826968842 | -6.529499093  | 1.827214375   |
| N374  | -4.965968484 | -4.334870104  | 1.687900994   |
| N375  | -5.865637933 | -2.868612018  | 3.960665204   |
| N376  | -5.723550251 | -4.754402800  | 6.157423468   |
| N377  | -3.232767524 | -6.180568859  | 5.992418223   |
| N378  | -1.175438536 | -4.407736983  | 5.395225352   |
| N379  | -1.464663984 | -1.615936751  | 6.383491575   |
| N380  | -2.667240529 | -2.184741144  | 8.976868364   |
| N381  | 4.374753818  | -12.459103538 | 3.434548803   |
| N382  | 5.376927053  | -10.067413962 | 2.734802896   |
| N383  | 4.618360548  | -3.867083968  | 2.678288713   |
| N384  | 3.561356568  | -2.961497995  | 4.558314473   |
| N385  | 4.248187043  | -1.582338258  | 2.811008683   |
| N386  | 8.172817550  | -8.061996094  | 3.453441403   |
| N387  | -5.314278880 | -1.687530577  | -4.308336507  |
| N388  | -1.321026620 | -4.303092547  | -4.513195773  |
| N389  | -5.562793822 | 0.621538811   | -3.004629589  |
| N390  | -8.046215837 | 1.379142144   | -2.031100270  |
| N391  | -7.908848672 | 0.368973400   | 0.586793108   |
| N392  | -5.788518387 | 1.785072995   | 1.823692244   |
| N393  | -2.781054819 | 3.182449957   | -0.868181629  |
| N394  | -1.974156722 | 1.124232005   | -0.778996828  |
| N395  | -6.575964142 | 4.267712473   | 2.805822757   |
| N396  | -9.547498965 | 7.718299511   | 1.514812983   |
| N397  | -9.699191272 | 9.172937487   | 3.183285637   |
| N398  | 8.706070113  | 1.021056682   | 4.885938658   |
| N399  | 6.526448460  | 7.032459484   | 2.792133246   |
| N400  | 5.006780193  | 8.727818580   | 0.082061394   |
| N401  | 2.528963456  | 8.128811215   | -1.062573742  |
| N402  | -1.846876349 | 7.278348213   | -3.218871656  |
| N403  | -1.488903942 | 9.449149632   | -4.024441608  |
| N404  | -3.046715761 | 9.070182876   | -2.349328749  |
| N405  | 1.080821297  | 6.486027414   | 0.793274724   |
| N406  | 1.079234317  | 8.169343116   | 3.033023799   |
| N407  | -0.105806619 | 10.744847672  | 3.062724701   |
| N408  | -0.974764119 | 10.613196429  | -0.088239458  |
| N409  | -2.685700878 | 11.262291227  | 3.906744857   |
| N410  | 5.607542297  | -2.022924991  | -10.447497715 |
| N411  | 3.682324720  | -0.577631938  | -7.746786029  |
| N412  | 2.477587375  | 2.033165641   | -6.674657059  |
| N413  | 4.471215495  | 3.956985166   | -5.950795604  |
| N414  | -0.019780340 | -0.347585788  | -10.619774649 |
| N415  | -1.835516209 | 1.110745259   | -8.936753273  |
| N416  | 8.974626331  | -5.567604942  | -6.039909339  |

|      |              |               |              |
|------|--------------|---------------|--------------|
| N417 | 4.848999844  | -4.611239579  | -4.938843769 |
| N418 | 4.645118465  | -4.966472983  | -7.108738446 |
| N419 | 9.434728644  | -6.996210252  | -3.208116057 |
| N420 | 0.425091611  | 1.451582150   | 1.141413454  |
| N421 | 1.244859596  | 1.190626695   | 0.404148447  |
| O422 | -6.869088903 | -4.939996875  | -0.804155549 |
| O423 | -8.248470068 | -3.372177316  | 2.187052810  |
| O424 | -7.187571885 | -6.433416310  | 4.084730588  |
| O425 | -3.727262968 | -5.505075164  | 3.194502515  |
| O426 | -3.732488770 | -2.115045164  | 4.194603706  |
| O427 | -5.070856211 | -2.964426510  | 7.415995869  |
| O428 | -3.376799951 | -6.574865478  | 8.248390812  |
| O429 | 0.408682715  | -6.062728654  | 5.605274184  |
| O430 | 0.761768956  | -1.955735853  | 6.781515348  |
| O431 | -1.021634482 | -0.836712441  | 9.766843800  |
| O432 | -1.426121417 | -3.455263704  | 12.090857549 |
| O433 | 6.163488964  | -10.836958184 | 0.698930514  |
| O434 | 6.766917630  | -9.044077272  | 4.984990697  |
| O435 | 10.714159898 | -6.128341148  | 5.087069038  |
| O436 | -5.562670349 | -0.377479951  | -0.940556786 |
| O437 | -3.110147297 | -3.184466851  | -5.359892344 |
| O438 | -7.088304179 | 3.100249775   | -0.878286429 |
| O439 | -5.722992449 | 4.320760781   | -3.429466775 |
| O440 | -9.975993846 | 1.257467995   | 1.055573728  |
| O441 | -6.304450353 | 0.857365512   | 3.842776777  |
| O442 | -4.834155222 | 4.217560884   | 4.277664536  |
| O443 | -7.368490918 | 6.193186938   | 5.671152519  |
| O444 | 9.205605672  | -2.292869584  | 5.972203919  |
| O445 | 2.845258290  | 3.575244175   | 5.660654824  |
| O446 | 3.971234485  | 8.351431179   | 2.076297292  |
| O447 | 1.834247893  | 10.302296737  | -0.783025147 |
| O448 | -0.807086724 | 7.394449958   | -0.127950649 |
| O449 | -0.733155641 | 7.052783881   | 3.881400991  |
| O450 | 2.184518902  | 5.242284976   | 3.372113963  |
| O451 | 0.832818525  | 11.202103964  | 5.098394701  |
| O452 | -2.417340645 | 13.513776996  | 3.663039817  |
| O453 | -2.774745300 | 11.870749535  | 0.544732555  |
| O454 | -5.113920346 | 12.572815997  | 6.191484565  |
| O455 | -4.865245958 | 7.413083266   | -0.589088987 |
| O456 | 3.125796556  | -2.224892539  | -9.250824310 |
| O457 | 1.112536385  | 1.402380278   | -8.401309106 |
| O458 | 3.113993636  | 5.640820665   | -6.692920728 |
| O459 | 7.704568713  | 5.537443816   | -6.322359296 |
| O460 | -3.468477021 | -0.148644378  | -9.916209922 |
| O461 | -0.416153926 | -4.788080842  | -7.512311654 |
| O462 | 1.587480938  | -3.855860426  | -7.827412320 |
| O463 | -2.559010418 | 4.472843721   | -7.987161123 |
| O464 | 10.335595487 | -4.920687359  | -3.182870278 |
| O465 | 12.717396232 | -6.988264462  | -1.770695293 |
| O466 | -0.233866689 | -5.812334841  | -2.004279724 |
| O467 | 0.034354524  | -8.002444819  | -1.725083370 |
| O468 | 5.046940647  | -10.007847306 | -4.878357125 |
| O469 | 2.933173991  | -9.574092959  | -5.542638106 |
| O470 | 5.113102385  | -5.461084999  | -1.883145125 |
| O471 | 4.751252102  | -7.479850621  | -0.950301580 |
| O472 | 2.785227068  | -5.364660169  | -3.082196802 |
| O473 | 8.552263619  | -7.111699786  | 0.790358065  |
| O474 | 6.943102172  | -4.856428985  | 0.178588012  |
| O475 | -3.718356901 | 5.497066945   | -1.978487090 |
| O476 | 7.775899920  | -10.033513155 | -3.431688420 |
| O477 | 7.118425675  | -8.808662709  | -0.919199597 |

|                          |                        |              |               |              |
|--------------------------|------------------------|--------------|---------------|--------------|
|                          | S478                   | 4.207708178  | 5.291739148   | -0.154340031 |
|                          | S479                   | 2.504745567  | 2.589068554   | -2.071304543 |
|                          | S480                   | 2.497814707  | -2.265462036  | -3.929130500 |
|                          | S481                   | 4.044759225  | 1.591102823   | 1.025764179  |
|                          | S482                   | 0.214357542  | -1.546613301  | -1.630909682 |
|                          | S483                   | 4.817378672  | 0.683252855   | -4.841891511 |
|                          | S484                   | 3.410400674  | -3.208814582  | -0.570181476 |
|                          | S485                   | 6.159426991  | 2.236027370   | -1.665893843 |
|                          | S486                   | 6.080960896  | -2.477209072  | -3.054887666 |
|                          | S487                   | 6.425463747  | -1.120646474  | 0.418272943  |
| <b>6<sup>-2</sup>(a)</b> | bmlcnx2b262n2x47.car_3 |              |               |              |
| Fe( 139) 0.558 2.408     | C1                     | -8.250172796 | -4.458490299  | -0.963581726 |
| Fe( 140) 0.341 0.294     | C2                     | -8.333409923 | -5.587970346  | -1.995550555 |
| Fe( 141) 0.587 2.922     | C3                     | -9.290521948 | -2.404343908  | -0.110433712 |
| Fe( 142) 0.532 -2.364    | C4                     | -9.259006629 | -2.683657742  | 1.389242375  |
| Fe( 143) 0.608 3.166     | C5                     | -9.847313070 | -4.179110437  | 3.222796413  |
| Fe( 144) 0.499 -2.295    | C6                     | -8.451192350 | -4.562333130  | 3.727592287  |
| Fe( 145) 0.331 0.494     | C7                     | -6.242173874 | -5.443489115  | 3.143204923  |
| <b>S=5/2</b>             | C8                     | -5.364474219 | -4.191178190  | 3.244073158  |
|                          | C9                     | -4.791709025 | -2.001541984  | 2.337190408  |
|                          | C10                    | -5.125907680 | -1.156457042  | 3.574326503  |
|                          | C11                    | -6.811976382 | -0.361303908  | 5.129827545  |
|                          | C12                    | -6.398504314 | -0.996546347  | 6.464482731  |
|                          | C13                    | -6.451204701 | -3.000568233  | 7.872421387  |
|                          | C14                    | -5.059556844 | -3.573644340  | 8.166908056  |
|                          | C15                    | -3.038034380 | -4.630803718  | 7.249676021  |
|                          | C16                    | -1.808235017 | -3.811859401  | 6.850218133  |
|                          | C17                    | -1.006440309 | -1.756919578  | 5.717615439  |
|                          | C18                    | -0.978263531 | -0.413862218  | 6.468500117  |
|                          | C19                    | -1.094630703 | -1.614851265  | 4.174152650  |
|                          | C20                    | -0.100686269 | -0.586495579  | 3.625033970  |
|                          | C21                    | -0.893432872 | -2.977510484  | 3.500411004  |
|                          | C22                    | -2.194987952 | 1.632462186   | 7.101489923  |
|                          | C23                    | -2.492932446 | 1.432524334   | 8.601207642  |
|                          | C24                    | -3.211219273 | 2.580199533   | 6.421375163  |
|                          | C25                    | -3.384073862 | 3.872275223   | 7.229529199  |
|                          | C26                    | -2.781257408 | 2.904251126   | 4.984793150  |
|                          | C27                    | -3.907216991 | 0.452841232   | 10.313700482 |
|                          | C28                    | -2.731817603 | 0.044583718   | 11.177203515 |
|                          | C29                    | 3.283322686  | -11.667249644 | 5.798857247  |
|                          | C30                    | 4.125086541  | -10.525553185 | 5.226941896  |
|                          | C31                    | 4.685723426  | -8.112112506  | 5.555191072  |
|                          | C32                    | 5.674200447  | -7.821336885  | 6.700004169  |
|                          | C33                    | 3.681857228  | -6.959090945  | 5.361825586  |
|                          | C34                    | 4.346189787  | -5.625602333  | 5.009322618  |
|                          | C35                    | 3.318953217  | -4.578589053  | 4.580819942  |
|                          | C36                    | 3.544670994  | -2.094924369  | 4.415099302  |
|                          | C37                    | 7.981918877  | -7.229294511  | 7.268754629  |
|                          | C38                    | 8.429747945  | -5.782906027  | 7.267442517  |
|                          | C39                    | -4.919185312 | -2.100089648  | -2.794200200 |
|                          | C40                    | -5.299154655 | -0.635422860  | -2.529766640 |
|                          | C41                    | -3.446023813 | -2.306014262  | -2.388413321 |
|                          | C42                    | -3.015453696 | -3.777060924  | -2.214774243 |
|                          | C43                    | -2.475696020 | -4.450310834  | -3.473441938 |
|                          | C44                    | -5.375550057 | 1.590380695   | -3.618696224 |
|                          | C45                    | -6.767278823 | 2.170885571   | -3.329086263 |
|                          | C46                    | -4.807878995 | 2.194144052   | -4.919691959 |
|                          | C47                    | -9.001266439 | 1.684106408   | -2.431655278 |
|                          | C48                    | -8.925878175 | 1.797109851   | -0.901896915 |
|                          | C49                    | -7.631062864 | 1.342591421   | 1.132703973  |



|      |              |              |              |
|------|--------------|--------------|--------------|
| C50  | -6.583693410 | 2.332316311  | 1.653567066  |
| C51  | -4.578056417 | 3.682695784  | 1.199565698  |
| C52  | -5.117920151 | 5.042699790  | 1.663004562  |
| C53  | -3.608340821 | 3.976289933  | 0.040976052  |
| C54  | -2.988986311 | 2.758082675  | -0.555181211 |
| C55  | -2.889627431 | 1.449428954  | -0.130733680 |
| C56  | -1.894228672 | 1.510827715  | -2.031128838 |
| C57  | -6.660664193 | 6.854809465  | 1.029454069  |
| C58  | -7.097822729 | 7.115037590  | 2.471071827  |
| C59  | -7.865338460 | 6.984506679  | 0.068083802  |
| C60  | -8.280513998 | 8.380033648  | -0.289606478 |
| C61  | -8.352350772 | 9.524893497  | 0.479810015  |
| C62  | -8.961330729 | 9.956796475  | -1.607615266 |
| C63  | 7.627045582  | 0.597775241  | 6.105025633  |
| C64  | 8.406568665  | -0.698244479 | 6.225656939  |
| C65  | 6.275773659  | 0.247814536  | 5.428644135  |
| C66  | 5.361883180  | 1.441299721  | 5.279564066  |
| C67  | 4.471930497  | 1.810549180  | 6.306064021  |
| C68  | 5.370032605  | 2.216366808  | 4.106919339  |
| C69  | 3.619534976  | 2.912119132  | 6.170345636  |
| C70  | 4.533568161  | 3.324762934  | 3.961062394  |
| C71  | 3.656507263  | 3.670179247  | 4.993337273  |
| C72  | 6.465052267  | 6.508303994  | 0.183853054  |
| C73  | 5.643767759  | 7.636764556  | -0.453320987 |
| C74  | 5.572813401  | 5.281477082  | 0.418912209  |
| C75  | 5.222490834  | 8.957157534  | -2.485127383 |
| C76  | 3.819796403  | 8.572048917  | -2.961895273 |
| C77  | 2.181162329  | 6.749522092  | -3.270349676 |
| C78  | 1.232059357  | 6.714602113  | -2.051493787 |
| C79  | 2.341335612  | 5.383693668  | -3.962825464 |
| C80  | 1.071965524  | 4.700285968  | -4.480157052 |
| C81  | 0.371921993  | 5.358772691  | -5.680216880 |
| C82  | -0.834477220 | 7.545990347  | -5.666954095 |
| C83  | 0.920799698  | 6.287055563  | 0.326683620  |
| C84  | 0.776252339  | 7.658303133  | 1.013967540  |
| C85  | 1.402671312  | 5.272533952  | 1.374205081  |
| C86  | 1.968424315  | 9.668815545  | 1.739724967  |
| C87  | 1.548586874  | 11.053345278 | 1.256645985  |
| C88  | 0.579302807  | 12.421113562 | -0.538391042 |
| C89  | -0.807392947 | 12.958988244 | -0.123031336 |
| C90  | 0.737788141  | 12.398940975 | -2.074016522 |
| C91  | -0.240411726 | 11.430597859 | -2.728804028 |
| C92  | -3.013325593 | 12.414335806 | 0.800462599  |
| C93  | -3.085999807 | 13.483908035 | 1.884669062  |
| C94  | -3.787337648 | 11.149533202 | 1.260034766  |
| C95  | -3.884125108 | 10.114927905 | 0.162340840  |
| C96  | -4.883173444 | 10.208469224 | -0.817884102 |
| C97  | -2.937871212 | 9.082967740  | 0.050232886  |
| C98  | -4.928130641 | 9.316700103  | -1.892107376 |
| C99  | -2.952075745 | 8.197117189  | -1.031739820 |
| C100 | -3.947177835 | 8.330009039  | -1.997653849 |
| C101 | 5.893891729  | -4.570419232 | -7.681246690 |
| C102 | 4.424380255  | -4.210408885 | -7.536065338 |
| C103 | 2.825268316  | -2.537668887 | -6.625680992 |
| C104 | 2.575222977  | -1.184856975 | -7.305888454 |
| C105 | 3.080555891  | 1.213753447  | -7.228961893 |
| C106 | 4.278824717  | 2.142433320  | -7.051221255 |
| C107 | 6.444143067  | 2.613268592  | -6.011203733 |
| C108 | 7.629505465  | 2.344065235  | -6.916521383 |
| C109 | -0.585709796 | -3.648666070 | -9.477413410 |
| C110 | -1.551803445 | -2.456908067 | -9.460933897 |

|       |               |               |              |
|-------|---------------|---------------|--------------|
| C111  | -0.516607947  | -4.281372457  | -8.068090850 |
| C112  | 0.124510347   | -5.681525719  | -8.108877144 |
| C113  | 0.445593014   | -6.160408749  | -6.710960164 |
| C114  | -1.897036463  | -0.095894477  | -8.922747046 |
| C115  | -1.152487578  | 1.126382720   | -9.421858574 |
| C116  | -2.613765435  | 0.098556449   | -7.564033982 |
| C117  | -1.630347870  | 0.007549751   | -6.432101424 |
| C118  | -0.870683621  | 1.122041491   | -6.046367839 |
| C119  | -1.347705153  | -1.242238348  | -5.853891986 |
| C120  | 0.193381488   | 0.970402120   | -5.152808162 |
| C121  | -0.279302292  | -1.392039249  | -4.967396448 |
| C122  | 0.514289226   | -0.289062354  | -4.644224465 |
| C123  | 8.140759625   | -7.081611314  | -2.219595072 |
| C124  | 9.007717408   | -7.304982380  | -0.968796072 |
| C125  | 6.670858361   | -7.476637443  | -2.004909826 |
| C126  | 5.730974614   | -7.124356447  | -3.116706929 |
| C127  | 5.656817531   | -7.697572841  | -4.371443642 |
| C128  | 3.994631645   | -6.255848536  | -4.119286868 |
| C129  | 9.624661210   | -8.683176100  | 0.936133634  |
| C130  | 11.104833078  | -8.596125947  | 0.635570699  |
| C131  | -0.105040218  | -6.882395234  | 0.295603323  |
| C132  | 1.276005585   | -6.769238982  | 0.878094309  |
| C133  | 2.413267677   | -7.144442381  | -0.159072657 |
| C134  | 2.201095985   | -8.605932114  | -0.657438017 |
| C135  | 3.374697839   | -9.098448104  | -1.519751010 |
| C136  | 3.373329645   | -10.576908436 | -1.779679909 |
| C137  | 3.759482056   | -7.135513532  | 0.633087223  |
| C138  | 4.054281948   | -1.165007683  | -1.210496255 |
| Fe139 | 4.573846032   | -2.405214594  | -2.624541507 |
| Fe140 | 2.459191474   | 0.209279197   | -0.634646543 |
| Fe141 | 5.261603366   | -0.025492157  | -0.031565490 |
| Fe142 | 4.567456511   | 0.173731494   | -2.526948306 |
| Fe143 | 4.436046650   | 2.373625775   | -1.033815727 |
| Fe144 | 5.001408161   | -2.561188183  | -0.070403598 |
| Fe145 | 2.563572407   | -2.365497813  | -0.871997014 |
| H146  | -6.731187838  | -6.642427582  | -1.305948507 |
| H147  | -6.394886572  | -5.739463142  | -2.621112068 |
| H148  | -10.006840428 | -3.665451020  | -1.679192857 |
| H149  | -8.676458745  | -5.170020635  | -2.955190051 |
| H150  | -9.131137988  | -6.272313996  | -1.659055245 |
| H151  | -8.410280665  | -1.781890080  | -0.325372850 |
| H152  | -10.334074883 | -4.416810047  | 1.138011179  |
| H153  | -10.190364707 | -1.816097341  | -0.335007571 |
| H154  | -10.526298263 | -5.028009097  | 3.378456093  |
| H155  | -7.905417403  | -5.159119157  | 1.840345942  |
| H156  | -10.191306325 | -3.343656706  | 3.846860084  |
| H157  | -3.710581616  | -2.190355971  | 2.364131079  |
| H158  | -6.155433466  | -3.437847720  | 1.487209147  |
| H159  | -5.837562857  | -6.111383006  | 2.370717698  |
| H160  | -6.351031337  | 0.633853631   | 5.093393138  |
| H161  | -7.146779583  | -1.588818650  | 3.392547649  |
| H162  | -6.183133046  | -5.954942268  | 4.111598229  |
| H163  | -5.014401284  | -1.426935182  | 1.426342599  |
| H164  | -7.100090154  | -2.843657008  | 5.845520230  |
| H165  | -7.904027874  | -0.238888465  | 5.120940711  |
| H166  | -1.636514886  | -3.715057787  | 3.836665713  |
| H167  | -0.981726459  | -2.879629371  | 2.407236678  |
| H168  | 0.112172383   | -3.375915539  | 3.710188401  |
| H169  | -2.111105947  | -1.259424124  | 3.940776591  |
| H170  | -7.165285786  | -3.835485705  | 7.924369962  |
| H171  | -2.705247375  | 2.005223457   | 4.357273016  |

|      |              |              |               |
|------|--------------|--------------|---------------|
| H172 | -4.150412595 | 0.230510816  | 8.204843430   |
| H173 | -3.748539992 | 3.683161290  | 8.249490009   |
| H174 | -0.231999260 | -0.482371150 | 2.538703251   |
| H175 | 0.939049898  | -0.902647855 | 3.790686071   |
| H176 | 7.413858039  | 0.957490911  | 7.129460069   |
| H177 | -3.514712745 | 3.578532386  | 4.519133949   |
| H178 | -4.110005511 | 4.528405232  | 6.727206391   |
| H179 | -1.802646890 | 3.411356647  | 4.980685206   |
| H180 | -2.427754359 | 4.413975354  | 7.305469430   |
| H181 | -4.186858490 | 2.061446769  | 6.389137543   |
| H182 | -1.199111303 | 2.098566370  | 7.078900238   |
| H183 | -2.865522454 | 0.083341430  | 5.769285658   |
| H184 | -0.236686630 | 0.409511462  | 4.073513173   |
| H185 | 1.653104735  | 4.323095929  | 0.870156012   |
| H186 | 0.563085707  | 5.093554653  | 2.064558026   |
| H187 | 2.562228283  | 5.374175023  | 2.959232639   |
| H188 | 2.208756691  | 4.850394402  | 5.527373769   |
| H189 | 4.526824824  | 3.890255148  | 3.028384280   |
| H190 | 6.002904627  | 1.922874544  | 3.265920873   |
| H191 | 4.431694057  | 1.221070605  | 7.226070859   |
| H192 | -3.029090130 | -2.386723233 | 6.053193518   |
| H193 | -3.015062151 | -5.553339504 | 6.650641944   |
| H194 | -2.915248144 | -4.908301243 | 8.305029349   |
| H195 | -4.730928824 | -3.961136407 | 6.151125232   |
| H196 | -6.675892465 | -2.302345183 | 8.689184973   |
| H197 | 2.918738081  | 3.169193574  | 6.969506578   |
| H198 | -0.059855496 | -2.246374043 | 5.981733913   |
| H199 | -4.369737776 | 1.359918942  | 10.737397499  |
| H200 | -4.644591308 | -0.364559014 | 10.366333351  |
| H201 | -1.952084163 | -0.556564907 | 10.655763937  |
| H202 | 8.853300541  | -7.881835034 | 7.110089337   |
| H203 | -1.047500672 | -5.779804594 | -4.100232664  |
| H204 | -0.176347342 | -8.677911608 | 1.000175825   |
| H205 | -0.580932417 | -6.392530064 | -8.562034070  |
| H206 | 1.037779739  | -5.663368895 | -8.720649595  |
| H207 | -1.526385878 | -4.365423553 | -7.637301128  |
| H208 | -0.307345000 | 0.901919562  | -10.114370193 |
| H209 | -1.077443247 | -4.375230301 | -10.142841988 |
| H210 | -2.801844301 | -1.804792891 | -3.127011807  |
| H211 | -3.869940689 | -4.383789776 | -1.865416057  |
| H212 | -0.081259638 | -1.212845614 | -8.684576266  |
| H213 | -2.688623908 | -0.251224570 | -9.684448170  |
| H214 | 1.265765884  | -2.711081199 | -9.467586809  |
| H215 | -1.024275236 | -5.447553623 | -2.370625216  |
| H216 | 0.052214254  | -3.610639676 | -7.406995533  |
| H217 | 1.236174880  | -4.140556993 | -10.281807441 |
| H218 | -6.082029067 | -2.845186469 | -4.330835355  |
| H219 | -3.277000995 | -1.776610124 | -1.441473889  |
| H220 | 2.303681647  | -5.584986981 | -7.009947583  |
| H221 | -2.260511248 | -3.838983278 | -1.418450345  |
| H222 | -4.038831278 | 3.242373529  | 2.049999783   |
| H223 | -3.259364829 | 1.019226412  | 0.793598155   |
| H224 | -8.585171147 | 1.638611359  | 1.586625226   |
| H225 | -7.094520629 | 0.802818817  | -0.864002213  |
| H226 | -6.577297852 | 4.868280096  | 0.238986253   |
| H227 | -8.119702639 | 9.721815235  | 1.519802727   |
| H228 | -7.567668281 | 6.224206645  | 2.958781371   |
| H229 | -8.713568533 | 6.404383150  | 0.472673597   |
| H230 | -5.875028200 | 7.579207721  | 0.758646001   |
| H231 | -9.301361842 | 10.528713519 | -2.468933117  |
| H232 | -2.838318321 | 4.661999406  | 0.432091197   |

|      |              |              |              |
|------|--------------|--------------|--------------|
| H233 | -4.150582212 | 4.541776193  | -0.738116049 |
| H234 | -8.931557835 | 11.493670449 | -0.131925573 |
| H235 | -7.578889915 | 6.493162795  | -0.874351928 |
| H236 | -5.509096574 | 2.279907714  | -0.108028832 |
| H237 | -7.385508849 | 0.342680405  | 1.521782884  |
| H238 | -9.321876769 | 2.661111628  | -2.814840499 |
| H239 | -1.326991284 | 1.249194104  | -2.921033564 |
| H240 | -9.783110385 | 0.953989262  | -2.681164099 |
| H241 | 9.132869950  | 1.965417877  | 5.852093480  |
| H242 | 7.790961639  | 2.301761106  | 4.978825429  |
| H243 | 2.691998399  | 5.843747625  | -0.843486965 |
| H244 | -0.093497519 | 5.994669690  | 0.018435900  |
| H245 | 2.649951510  | 8.206484769  | 0.380532547  |
| H246 | -2.280105620 | 3.601565541  | -2.398840782 |
| H247 | -3.478650277 | 4.590472674  | -4.168888024 |
| H248 | -3.303035523 | 5.874898486  | -3.275850646 |
| H249 | -3.780723846 | 1.833209547  | -5.066992292 |
| H250 | -5.423477055 | 1.868837193  | -5.776510698 |
| H251 | 1.781623696  | 12.143551233 | -2.308784971 |
| H252 | 0.528924456  | 13.409396394 | -2.448603309 |
| H253 | 1.270958949  | 9.997792668  | -3.063190474 |
| H254 | -0.373658426 | 9.506977745  | -3.405016009 |
| H255 | -0.173477335 | 9.073789497  | -6.858031207 |
| H256 | -0.080582609 | 4.587004473  | -6.321633190 |
| H257 | -5.720905371 | 9.392773179  | -2.639903293 |
| H258 | -2.167218358 | 8.947162935  | 0.814350682  |
| H259 | -2.375582828 | 7.937204380  | -4.358063808 |
| H260 | 2.830145074  | 4.686643789  | -3.264013694 |
| H261 | 4.157702376  | 6.595771195  | -2.472700130 |
| H262 | 0.346839316  | 4.544887216  | -3.666285063 |
| H263 | -7.540927202 | 0.303469190  | -3.176381606 |
| H264 | 5.810251081  | 9.241822474  | -3.368407871 |
| H265 | -5.120962999 | -0.397084700 | -4.504834324 |
| H266 | 3.039891159  | 5.527835011  | -4.804205787 |
| H267 | -2.171886575 | 7.441716837  | -1.140144971 |
| H268 | -5.592638030 | 3.885068843  | -4.361001992 |
| H269 | 5.100843086  | 9.850559539  | -1.856861995 |
| H270 | 0.447403106  | 7.517409247  | -7.277660248 |
| H271 | -2.111603678 | 9.132907944  | -5.570689327 |
| H272 | -4.447602885 | -3.145175868 | -4.500717396 |
| H273 | -5.543673468 | -2.686030978 | -2.092831876 |
| H274 | -5.644699193 | 10.987442302 | -0.745535535 |
| H275 | -4.750582367 | 1.946129975  | -2.780824814 |
| H276 | 1.731949560  | 7.478191451  | -3.957834482 |
| H277 | 1.112171418  | 5.887251978  | -6.295607420 |
| H278 | 1.383705427  | 3.696648998  | -4.797816471 |
| H279 | -1.438542836 | 5.889064104  | -4.661311326 |
| H280 | 1.396446208  | 9.475184125  | 2.659638400  |
| H281 | 0.860409534  | 10.278005526 | -0.516072237 |
| H282 | 1.294411461  | 13.150848885 | -0.131343593 |
| H283 | 3.030319420  | 9.739661651  | 2.012461256  |
| H284 | -1.318436270 | 11.115932876 | 0.590690892  |
| H285 | 6.503540783  | -3.655618466 | -7.705677288 |
| H286 | 6.166145844  | -5.109828654 | -6.750247359 |
| H287 | 8.186659300  | -6.000494744 | -2.415333215 |
| H288 | 7.028016290  | -5.792437288 | -8.855156557 |
| H289 | 5.421182341  | -6.101247486 | -8.933309572 |
| H290 | 6.194306368  | 4.467488842  | 0.815832714  |
| H291 | 6.323231491  | 7.319621416  | 2.048716375  |
| H292 | 6.631806456  | 7.369150605  | -2.235643647 |
| H293 | 4.786203347  | 5.530997393  | 1.145285810  |

|      |              |               |              |
|------|--------------|---------------|--------------|
| H294 | 7.730593394  | 7.680149147   | 1.294410991  |
| H295 | 6.758979088  | 2.502574668   | -4.961125119 |
| H296 | 7.282700488  | 6.225329118   | -0.498857498 |
| H297 | 3.077340747  | -6.859218291  | 6.278777882  |
| H298 | 5.231656178  | -8.273211593  | 4.617827788  |
| H299 | 5.269212519  | 0.868970166   | -5.722465190 |
| H300 | 3.691672392  | -0.126898183  | 3.862433631  |
| H301 | 2.866705403  | 1.165539028   | -8.305114079 |
| H302 | -0.069920527 | -2.363985078  | -4.514465327 |
| H303 | 2.217805263  | 1.719546109   | -6.762193987 |
| H304 | 2.625979135  | -4.348612109  | 5.400127497  |
| H305 | 3.671419113  | -0.334471799  | -5.814506794 |
| H306 | 2.709776592  | -4.968620689  | 3.747458345  |
| H307 | 3.004423925  | -7.265743770  | 4.548514279  |
| H308 | 5.055459912  | -5.766557732  | 4.179655560  |
| H309 | 4.921734267  | -5.237783090  | 5.865127715  |
| H310 | -3.385123672 | -0.680006513  | -7.475073523 |
| H311 | 3.372605786  | -9.386441679  | 6.690227636  |
| H312 | 2.484885206  | -11.851110774 | 5.063563591  |
| H313 | 1.364531107  | -0.388969534  | -3.972955796 |
| H314 | 3.296295504  | -11.646757879 | 7.859240463  |
| H315 | 1.810052281  | -11.887440374 | 7.215792256  |
| H316 | 4.448587681  | -3.428221492  | 3.220035989  |
| H317 | 0.788271344  | 1.827399073   | -4.835631543 |
| H318 | -1.962768860 | -2.107608748  | -6.111408124 |
| H319 | 6.595103420  | -10.644599642 | 0.937696212  |
| H320 | 6.617460735  | -8.568702443  | -1.847071525 |
| H321 | 5.393950617  | -8.755830573  | 1.914749957  |
| H322 | 6.059927410  | -11.297076043 | -0.353238106 |
| H323 | 7.427635740  | 1.654482418   | -7.772300990 |
| H324 | 5.798893504  | -5.630782972  | 1.464234051  |
| H325 | 1.380484256  | -7.401866663  | 1.771812924  |
| H326 | 4.930900426  | -2.524001023  | -6.484946100 |
| H327 | 2.095251362  | -9.264896405  | 0.219323023  |
| H328 | 4.207044051  | -7.357453024  | -5.912709216 |
| H329 | 3.095381914  | -5.695318912  | -4.339414438 |
| H330 | 3.931053165  | -12.560669286 | 5.793975637  |
| H331 | 4.340386756  | -1.247738273  | 2.699439084  |
| H332 | 7.295876156  | -6.554012735  | 3.075547926  |
| H333 | 6.666092847  | -4.382144357  | 1.789461370  |
| H334 | 7.164440171  | -7.463424207  | 5.289000289  |
| H335 | 2.923558936  | -2.514621568  | 6.331935965  |
| H336 | 2.342198156  | -11.978896597 | -2.518885086 |
| H337 | 3.352461344  | -8.570896280  | -2.485132531 |
| H338 | 4.331369409  | -8.873768637  | -1.036293590 |
| H339 | 1.270550978  | -8.651974527  | -1.240730325 |
| H340 | 2.714711440  | -2.450997794  | -5.533509921 |
| H341 | -1.095468196 | 2.101550572   | -6.476652927 |
| H342 | -3.116029925 | 1.077701605   | -7.596509751 |
| H343 | 1.445045053  | -5.719077152  | 1.150181661  |
| H344 | 7.177329976  | -8.108169010  | 3.059230933  |
| H345 | 5.734014377  | -9.850741747  | 2.962594149  |
| H346 | 2.561496052  | -0.921079557  | 5.791641910  |
| H347 | 6.277242838  | -8.443444437  | -4.856212364 |
| H348 | 6.307030248  | -7.005040266  | -1.083618333 |
| H349 | 2.095611618  | -3.251655153  | -7.012054204 |
| H350 | 6.134773502  | 3.660131257   | -6.164259739 |
| H351 | 5.789409027  | -0.521912082  | 6.047462565  |
| H352 | 6.478603643  | -0.194618929  | 4.439631401  |
| H353 | 9.672987773  | -7.421282160  | -3.540431948 |
| H354 | 8.827598813  | -8.772826881  | -3.172534044 |

|       |              |               |               |
|-------|--------------|---------------|---------------|
| H355  | 9.423943973  | -9.711983612  | 1.274675739   |
| H356  | 8.041446845  | -9.083150244  | -0.432375897  |
| H357  | 11.389483491 | -8.842687290  | -0.415752835  |
| H358  | 9.374796021  | -8.001590416  | 1.765397871   |
| H359  | 8.911323496  | -1.015223248  | 5.281373790   |
| H360  | -2.188731237 | 13.553277940  | 2.544511274   |
| H361  | 7.573746292  | -7.437806931  | 8.273278200   |
| H362  | 7.659528205  | -5.046350764  | 6.930386601   |
| H363  | -3.503043636 | 12.826171194  | -0.097110748  |
| H364  | -3.293412871 | 10.724680541  | 2.147867063   |
| H365  | -4.790156169 | 11.477940261  | 1.569637399   |
| H366  | -4.726878094 | 7.585886977   | -3.619606359  |
| H367  | 2.313298152  | -1.228953820  | 0.329404505   |
| H368  | -0.014623397 | -1.113667202  | -0.488782763  |
| Mo369 | 3.896511583  | -4.724654683  | -1.239225084  |
| N370  | -7.109979843 | -6.343835653  | -2.208567503  |
| N371  | -9.304322547 | -3.595316307  | -0.947326399  |
| N372  | -9.881855138 | -3.809551668  | 1.817690374   |
| N373  | -7.631251035 | -5.153363289  | 2.822423358   |
| N374  | -5.533620662 | -3.254066906  | 2.276234115   |
| N375  | -6.426895427 | -1.135064904  | 3.960612223   |
| N376  | -6.631921836 | -2.328675295  | 6.595498137   |
| N377  | -4.326288874 | -3.978479380  | 7.092428854   |
| N378  | -2.057363348 | -2.624149420  | 6.240689901   |
| N379  | -2.105582072 | 0.352111192   | 6.397249398   |
| N380  | -3.529195904 | 0.614798620   | 8.920414542   |
| N381  | 2.676259345  | -11.360259446 | 7.098689294   |
| N382  | 3.975858342  | -9.348088347  | 5.862020764   |
| N383  | 3.963657673  | -3.340179279  | 4.118466457   |
| N384  | 2.850424151  | -1.865604456  | 5.555067260   |
| N385  | 3.781182309  | -1.095372659  | 3.563760968   |
| N386  | 6.932237300  | -7.504034252  | 6.305759455   |
| N387  | -5.150000918 | -2.444183770  | -4.203304984  |
| N388  | -1.438415347 | -5.291680369  | -3.290802318  |
| N389  | -5.312954518 | 0.141372566   | -3.646576541  |
| N390  | -7.760540534 | 1.291638451   | -3.075369518  |
| N391  | -7.812711112 | 1.286396076   | -0.307013985  |
| N392  | -5.658099668 | 2.797976855   | 0.757734525   |
| N393  | -2.344747095 | 2.781967834   | -1.780729732  |
| N394  | -2.216097765 | 0.682629264   | -1.048752736  |
| N395  | -6.166158682 | 5.493312657   | 0.927769170   |
| N396  | -8.663940168 | 8.663165535   | -1.590883391  |
| N397  | -8.785134984 | 10.517023139  | -0.375704043  |
| N398  | 8.397496191  | 1.535954254   | 5.285401415   |
| N399  | 7.064756375  | 6.920346726   | 1.463044584   |
| N400  | 5.943872188  | 7.938625369   | -1.749592110  |
| N401  | 3.505986777  | 7.260898268   | -2.922704463  |
| N402  | -0.697501236 | 6.282044501   | -5.283286475  |
| N403  | -0.039062681 | 8.100290559   | -6.605496168  |
| N404  | -1.739272759 | 8.344269275   | -5.047725936  |
| N405  | 1.763088406  | 6.313693413   | -0.864937247  |
| N406  | 1.793006736  | 8.551090623   | 0.823883095   |
| N407  | 0.911657890  | 11.126312009  | 0.050140156   |
| N408  | 0.265585642  | 10.208027407  | -3.032203424  |
| N409  | -1.633131023 | 12.078011303  | 0.492280777   |
| N410  | 6.110499507  | -5.344000818  | -8.908580347  |
| N411  | 4.161968824  | -3.039548512  | -6.924928235  |
| N412  | 3.201239959  | -0.142904274  | -6.725197308  |
| N413  | 5.315551428  | 1.737596466   | -6.273745641  |
| N414  | 0.697497811  | -3.291575945  | -10.097290473 |
| N415  | -1.052298535 | -1.272647857  | -9.009581439  |

|      |              |               |              |
|------|--------------|---------------|--------------|
| N416 | 8.724462727  | -7.775126839  | -3.385106186 |
| N417 | 4.681337676  | -6.217664317  | -2.981726855 |
| N418 | 4.559130845  | -7.135372864  | -4.985862108 |
| N419 | 8.811483779  | -8.441996590  | -0.244604985 |
| N420 | 0.361779764  | 1.762997085   | 0.690174379  |
| N421 | 1.156524681  | 1.141303428   | 0.178506519  |
| O422 | -7.307067660 | -4.351250682  | -0.158267272 |
| O423 | -8.694316565 | -1.897274445  | 2.166293740  |
| O424 | -8.128244361 | -4.361721471  | 4.909822020  |
| O425 | -4.554559043 | -4.041319457  | 4.172869386  |
| O426 | -4.249030268 | -0.515335409  | 4.174839130  |
| O427 | -5.920673598 | -0.302269220  | 7.378783507  |
| O428 | -4.680527232 | -3.684556346  | 9.341396461  |
| O429 | -0.674941071 | -4.263231075  | 7.069867687  |
| O430 | 0.026143946  | -0.066253031  | 7.107613561  |
| O431 | -1.820951265 | 2.001551360   | 9.478142531  |
| O432 | -2.667618373 | 0.274952442   | 12.376213698 |
| O433 | 4.850954902  | -10.737199008 | 4.232328860  |
| O434 | 5.306656443  | -7.886163784  | 7.886414538  |
| O435 | 9.541314527  | -5.424524936  | 7.622497988  |
| O436 | -5.578288049 | -0.211453786  | -1.389329653 |
| O437 | -2.974440654 | -4.250290711  | -4.603827636 |
| O438 | -6.924108216 | 3.410451105   | -3.284701679 |
| O439 | -4.769309627 | 3.626245176   | -4.855730951 |
| O440 | -9.869439615 | 2.315321488   | -0.290050918 |
| O441 | -6.607874975 | 2.697063404   | 2.832814014  |
| O442 | -4.567651149 | 5.713778749   | 2.542282216  |
| O443 | -7.008313398 | 8.187541064   | 3.043971882  |
| O444 | 8.476682274  | -1.371708862  | 7.244236316  |
| O445 | 2.832929037  | 4.759733863   | 4.784066218  |
| O446 | 4.764781801  | 8.253651115   | 0.175947352  |
| O447 | 3.061843284  | 9.469527860   | -3.388286598 |
| O448 | 0.046095988  | 7.066123111   | -2.182384219 |
| O449 | -0.207032806 | 7.892095763   | 1.730022593  |
| O450 | 2.532416405  | 5.799848684   | 2.078200029  |
| O451 | 1.766257350  | 12.047346203  | 1.961390216  |
| O452 | -1.118028337 | 14.140257052  | -0.331632262 |
| O453 | -1.434575838 | 11.729033619  | -2.893580066 |
| O454 | -4.068669235 | 14.187913075  | 2.057076734  |
| O455 | -3.916723441 | 7.451839524   | -3.090970254 |
| O456 | 3.535894528  | -5.000131389  | -7.948746298 |
| O457 | 1.862998364  | -1.084692409  | -8.330017685 |
| O458 | 4.246035092  | 3.253289098   | -7.609073535 |
| O459 | 8.731379771  | 2.837818389   | -6.740190320 |
| O460 | -2.737616090 | -2.585228497  | -9.813173360 |
| O461 | -0.391199206 | -6.634305924  | -5.949006771 |
| O462 | 1.720387986  | -6.003372288  | -6.301151929 |
| O463 | -1.461288091 | 2.279062023   | -9.157309457 |
| O464 | 9.928960500  | -6.520589355  | -0.672382800 |
| O465 | 11.952596327 | -8.358291555  | 1.484700774  |
| O466 | -0.688718472 | -6.013849980  | -0.335219597 |
| O467 | -0.748642932 | -8.082503345  | 0.479687792  |
| O468 | 4.285050857  | -11.352187085 | -1.496624314 |
| O469 | 2.239425468  | -11.011701760 | -2.390287957 |
| O470 | 4.653970597  | -6.310722127  | 0.196235898  |
| O471 | 3.932509495  | -7.932256584  | 1.585790062  |
| O472 | 2.426198492  | -6.242843443  | -1.199480774 |
| O473 | 7.621804585  | -7.364263456  | 3.546615327  |
| O474 | 6.362696072  | -5.228756996  | 2.173298412  |
| O475 | -2.803955209 | 5.149117616   | -3.704271141 |
| O476 | 6.858585489  | -11.266800229 | 0.212904848  |

|                          |                         |              |               |              |
|--------------------------|-------------------------|--------------|---------------|--------------|
|                          | O477                    | 6.148258859  | -9.340683422  | 2.219618693  |
|                          | S478                    | 4.734822042  | 4.702114999   | -1.125109393 |
|                          | S479                    | 2.845841847  | 1.618662846   | -2.441283632 |
|                          | S480                    | 2.627752150  | -3.519211231  | -2.821583883 |
|                          | S481                    | 3.821118223  | 1.408944667   | 0.970059284  |
|                          | S482                    | 0.789589216  | -1.193715357  | -1.583334915 |
|                          | S483                    | 5.163957237  | -1.060673807  | -4.314277674 |
|                          | S484                    | 3.214932446  | -3.653345994  | 0.780755966  |
|                          | S485                    | 6.328758923  | 1.244452569   | -1.611907560 |
|                          | S486                    | 6.071169975  | -3.768629302  | -1.597215555 |
|                          | S487                    | 6.227362544  | -1.469739090  | 1.396733741  |
| <b>6<sup>-2</sup>(b)</b> | bm1cnx2b262n2x353.car_1 |              |               |              |
| Fe( 139) 0.556 -2.387    | C1                      | -8.257344594 | -4.457364908  | -0.970126526 |
| Fe( 140) 0.345 -0.080    | C2                      | -8.337520441 | -5.590249944  | -1.998909798 |
| Fe( 141) 0.564 -2.806    | C3                      | -9.312219228 | -2.413775421  | -0.108737221 |
| Fe( 142) 0.553 2.572     | C4                      | -9.267549894 | -2.694922623  | 1.391318442  |
| Fe( 143) 0.607 3.204     | C5                      | -9.839185886 | -4.195925948  | 3.227603600  |
| Fe( 144) 0.498 2.282     | C6                      | -8.438915247 | -4.566735668  | 3.728746839  |
| Fe( 145) 0.333 -0.469    | C7                      | -6.229315781 | -5.442616124  | 3.140032750  |
| <b>S=3/2</b>             | C8                      | -5.355971782 | -4.186945901  | 3.233161584  |
|                          | C9                      | -4.791761173 | -1.999961903  | 2.312034017  |
|                          | C10                     | -5.118168002 | -1.150624764  | 3.548402746  |
|                          | C11                     | -6.790601824 | -0.354268861  | 5.116532556  |
|                          | C12                     | -6.373590371 | -0.988934755  | 6.450699369  |
|                          | C13                     | -6.440527705 | -2.988203425  | 7.864853106  |
|                          | C14                     | -5.052414882 | -3.570319416  | 8.158286204  |
|                          | C15                     | -3.036115354 | -4.637997822  | 7.241569261  |
|                          | C16                     | -1.804124721 | -3.817337481  | 6.852303787  |
|                          | C17                     | -1.004648011 | -1.754779820  | 5.730371248  |
|                          | C18                     | -0.975163855 | -0.413619301  | 6.484660682  |
|                          | C19                     | -1.100252806 | -1.606657679  | 4.188343956  |
|                          | C20                     | -0.113228568 | -0.570565899  | 3.643071998  |
|                          | C21                     | -0.897859302 | -2.965346327  | 3.507482907  |
|                          | C22                     | -2.182009294 | 1.637670716   | 7.117339092  |
|                          | C23                     | -2.477280004 | 1.439979662   | 8.617737575  |
|                          | C24                     | -3.194449646 | 2.589234017   | 6.436607631  |
|                          | C25                     | -3.366978051 | 3.881783407   | 7.244015448  |
|                          | C26                     | -2.760270280 | 2.912208676   | 5.000832124  |
|                          | C27                     | -3.889720413 | 0.466714272   | 10.335414713 |
|                          | C28                     | -2.721735714 | 0.028693605   | 11.194998006 |
|                          | C29                     | 3.275347619  | -11.672354077 | 5.793030273  |
|                          | C30                     | 4.119213858  | -10.530735837 | 5.224073449  |
|                          | C31                     | 4.671401407  | -8.117177590  | 5.555213831  |
|                          | C32                     | 5.660818279  | -7.823965971  | 6.698007616  |
|                          | C33                     | 3.665960704  | -6.966432460  | 5.360719019  |
|                          | C34                     | 4.331250226  | -5.631520363  | 5.016476835  |
|                          | C35                     | 3.301545894  | -4.593090940  | 4.572719885  |
|                          | C36                     | 3.537145624  | -2.109207125  | 4.411603404  |
|                          | C37                     | 7.969287137  | -7.242194556  | 7.266050558  |
|                          | C38                     | 8.409783684  | -5.794052174  | 7.289030531  |
|                          | C39                     | -4.932619657 | -2.070948552  | -2.768949078 |
|                          | C40                     | -5.283250189 | -0.596370572  | -2.518703238 |
|                          | C41                     | -3.457004221 | -2.293030392  | -2.367746337 |
|                          | C42                     | -3.030071874 | -3.767664950  | -2.205782136 |
|                          | C43                     | -2.491146025 | -4.432482119  | -3.470153096 |
|                          | C44                     | -5.393391911 | 1.606698519   | -3.631312000 |
|                          | C45                     | -6.784652324 | 2.177935142   | -3.327803153 |
|                          | C46                     | -4.839778679 | 2.208967002   | -4.938120898 |
|                          | C47                     | -9.014701946 | 1.676156578   | -2.435607516 |
|                          | C48                     | -8.933556346 | 1.778297977   | -0.904285409 |



|      |              |              |              |
|------|--------------|--------------|--------------|
| C49  | -7.611979940 | 1.326827992  | 1.117090469  |
| C50  | -6.545032216 | 2.299295908  | 1.629455829  |
| C51  | -4.567485718 | 3.681272195  | 1.168097147  |
| C52  | -5.139878954 | 5.020676674  | 1.652477417  |
| C53  | -3.617890583 | 4.023966358  | 0.006085353  |
| C54  | -2.943421762 | 2.839698079  | -0.600679599 |
| C55  | -2.752888084 | 1.541046329  | -0.172428661 |
| C56  | -1.787990626 | 1.663082140  | -2.087664175 |
| C57  | -6.697134133 | 6.819319872  | 1.033049885  |
| C58  | -7.133854471 | 7.079548919  | 2.474334061  |
| C59  | -7.896408962 | 6.956952312  | 0.065523354  |
| C60  | -8.293877754 | 8.355424113  | -0.302761267 |
| C61  | -8.371844654 | 9.502887077  | 0.462258235  |
| C62  | -8.946686640 | 9.932337116  | -1.635240840 |
| C63  | 7.603791746  | 0.612809589  | 6.115931609  |
| C64  | 8.381527122  | -0.682422279 | 6.255759064  |
| C65  | 6.253880359  | 0.256073534  | 5.441492409  |
| C66  | 5.341474299  | 1.449425958  | 5.285870464  |
| C67  | 4.443899998  | 1.819350017  | 6.305426882  |
| C68  | 5.365023732  | 2.229223111  | 4.116564098  |
| C69  | 3.597404768  | 2.924493153  | 6.164774688  |
| C70  | 4.535821483  | 3.342479716  | 3.966326783  |
| C71  | 3.649035577  | 3.686822863  | 4.991132634  |
| C72  | 6.469870560  | 6.495307080  | 0.168807841  |
| C73  | 5.650742633  | 7.627471946  | -0.463024895 |
| C74  | 5.582776413  | 5.263382664  | 0.400303385  |
| C75  | 5.234081791  | 8.953534243  | -2.491433789 |
| C76  | 3.824845217  | 8.576456984  | -2.955682005 |
| C77  | 2.187377630  | 6.753066979  | -3.279266710 |
| C78  | 1.240289218  | 6.714889916  | -2.060305738 |
| C79  | 2.345837220  | 5.386625878  | -3.970275311 |
| C80  | 1.074680894  | 4.705799379  | -4.486452731 |
| C81  | 0.371168458  | 5.360084919  | -5.687133454 |
| C82  | -0.850279186 | 7.541092267  | -5.681484183 |
| C83  | 0.930317145  | 6.284631035  | 0.316235684  |
| C84  | 0.780292218  | 7.653679549  | 1.005669974  |
| C85  | 1.416263403  | 5.270532444  | 1.362208423  |
| C86  | 1.964806844  | 9.665413480  | 1.738702051  |
| C87  | 1.543501707  | 11.050454487 | 1.257088720  |
| C88  | 0.579313741  | 12.420867524 | -0.541026507 |
| C89  | -0.807794054 | 12.961820846 | -0.129572601 |
| C90  | 0.738318339  | 12.399814076 | -2.076658115 |
| C91  | -0.241622004 | 11.436023472 | -2.736566387 |
| C92  | -3.014841702 | 12.421536530 | 0.797563920  |
| C93  | -3.081670967 | 13.492266832 | 1.880136567  |
| C94  | -3.785132136 | 11.156169424 | 1.263684852  |
| C95  | -3.878862235 | 10.113833497 | 0.172592966  |
| C96  | -4.883506017 | 10.197762466 | -0.803079581 |
| C97  | -2.930446214 | 9.083460672  | 0.062775639  |
| C98  | -4.931095710 | 9.299388371  | -1.871653214 |
| C99  | -2.947184616 | 8.191052936  | -1.014061605 |
| C100 | -3.945347327 | 8.317419119  | -1.977825911 |
| C101 | 5.888879653  | -4.555067492 | -7.681029576 |
| C102 | 4.419820959  | -4.194790660 | -7.533390600 |
| C103 | 2.822202625  | -2.530125865 | -6.608658332 |
| C104 | 2.568937147  | -1.177233273 | -7.285079870 |
| C105 | 3.066097824  | 1.219502998  | -7.205774872 |
| C106 | 4.260819727  | 2.151918681  | -7.032019788 |
| C107 | 6.435514350  | 2.613399990  | -6.007814992 |
| C108 | 7.615306745  | 2.359066530  | -6.924742097 |
| C109 | -0.584811865 | -3.641840205 | -9.477129773 |

|       |               |               |              |
|-------|---------------|---------------|--------------|
| C110  | -1.555710121  | -2.455022401  | -9.459517631 |
| C111  | -0.521464104  | -4.275500023  | -8.067817629 |
| C112  | 0.123365047   | -5.673776917  | -8.107603082 |
| C113  | 0.445328731   | -6.150724723  | -6.709106178 |
| C114  | -1.920181247  | -0.102628159  | -8.905749056 |
| C115  | -1.201294919  | 1.130241385   | -9.414013671 |
| C116  | -2.621705830  | 0.075135622   | -7.537668268 |
| C117  | -1.629231723  | -0.006392389  | -6.412146503 |
| C118  | -0.864249557  | 1.110845152   | -6.045149659 |
| C119  | -1.352398806  | -1.247584412  | -5.812831281 |
| C120  | 0.196806098   | 0.969564852   | -5.146703014 |
| C121  | -0.285982434  | -1.386884430  | -4.921871253 |
| C122  | 0.510408350   | -0.281626341  | -4.613782816 |
| C123  | 8.160114367   | -7.091077818  | -2.220199257 |
| C124  | 9.016371978   | -7.307599321  | -0.960889847 |
| C125  | 6.689587275   | -7.489330547  | -2.011591596 |
| C126  | 5.749001830   | -7.135463386  | -3.122924279 |
| C127  | 5.678490435   | -7.708979136  | -4.377838428 |
| C128  | 4.016185475   | -6.266597720  | -4.130468221 |
| C129  | 9.616942414   | -8.676677256  | 0.955985690  |
| C130  | 11.098272930  | -8.592230963  | 0.660413840  |
| C131  | -0.094949314  | -6.920539607  | 0.269560876  |
| C132  | 1.281611177   | -6.792383372  | 0.858881671  |
| C133  | 2.423970298   | -7.165237823  | -0.174488180 |
| C134  | 2.218602045   | -8.627923660  | -0.672832392 |
| C135  | 3.393161747   | -9.124644450  | -1.532856822 |
| C136  | 3.383518409   | -10.604252214 | -1.787440347 |
| C137  | 3.762756810   | -7.148304898  | 0.625082840  |
| C138  | 4.046904461   | -1.162188907  | -1.204371263 |
| Fe139 | 4.545353846   | -2.421324685  | -2.622062974 |
| Fe140 | 2.444270025   | 0.204458516   | -0.634632655 |
| Fe141 | 5.344691537   | -0.047537852  | -0.051439995 |
| Fe142 | 4.518709669   | 0.169601673   | -2.501049340 |
| Fe143 | 4.524985026   | 2.329602059   | -0.923792610 |
| Fe144 | 5.003828983   | -2.569811460  | -0.079094050 |
| Fe145 | 2.550485342   | -2.371261716  | -0.875632794 |
| H146  | -6.725709493  | -6.636460519  | -1.315325233 |
| H147  | -6.401748579  | -5.738082806  | -2.637450682 |
| H148  | -10.025262203 | -3.678997344  | -1.675984810 |
| H149  | -8.685367792  | -5.175721390  | -2.958314961 |
| H150  | -9.130956684  | -6.277256848  | -1.657734455 |
| H151  | -8.440165494  | -1.781038012  | -0.326942601 |
| H152  | -10.335438390 | -4.433224663  | 1.145264694  |
| H153  | -10.219481940 | -1.834274946  | -0.326318958 |
| H154  | -10.508407315 | -5.052429418  | 3.383092024  |
| H155  | -7.900766191  | -5.172691411  | 1.842890899  |
| H156  | -10.190359535 | -3.364871333  | 3.853418800  |
| H157  | -3.709620824  | -2.185192304  | 2.331071723  |
| H158  | -6.154204175  | -3.445354510  | 1.475491259  |
| H159  | -5.825527859  | -6.112955679  | 2.369349788  |
| H160  | -6.324181400  | 0.638053100   | 5.074604847  |
| H161  | -7.139793772  | -1.586016796  | 3.385492262  |
| H162  | -6.165923416  | -5.950474365  | 4.110084447  |
| H163  | -5.023802899  | -1.428818799  | 1.401419523  |
| H164  | -7.092859915  | -2.831513224  | 5.839058336  |
| H165  | -7.882137846  | -0.226304948  | 5.113846133  |
| H166  | -1.638510960  | -3.705581744  | 3.842896732  |
| H167  | -0.990529448  | -2.862335303  | 2.415355276  |
| H168  | 0.109351535   | -3.362065991  | 3.712167863  |
| H169  | -2.119404502  | -1.254598147  | 3.961709856  |
| H170  | -7.161350489  | -3.817018932  | 7.921909472  |

|      |              |              |               |
|------|--------------|--------------|---------------|
| H171 | -2.681709878 | 2.012504033  | 4.374542320   |
| H172 | -4.137200259 | 0.240404406  | 8.225727167   |
| H173 | -3.743593632 | 3.694195387  | 8.259878297   |
| H174 | -0.253184782 | -0.454103850 | 2.559958143   |
| H175 | 0.929017363  | -0.882423521 | 3.800899898   |
| H176 | 7.388809992  | 0.984422204  | 7.136070093   |
| H177 | -3.492375175 | 3.585735957  | 4.531722338   |
| H178 | -4.083532824 | 4.542703755  | 6.734552314   |
| H179 | -1.781620596 | 3.419340774  | 4.999149114   |
| H180 | -2.408440434 | 4.417980389  | 7.330223298   |
| H181 | -4.171197146 | 2.072844811  | 6.401992286   |
| H182 | -1.183995127 | 2.099066229  | 7.092718580   |
| H183 | -2.859258283 | 0.093167990  | 5.782704892   |
| H184 | -0.251388678 | 0.420274068  | 4.101711060   |
| H185 | 1.662886506  | 4.321593209  | 0.855669220   |
| H186 | 0.579732583  | 5.091308222  | 2.055710763   |
| H187 | 2.561299677  | 5.400346832  | 2.956694522   |
| H188 | 2.204792400  | 4.870383200  | 5.521175987   |
| H189 | 4.545545171  | 3.917616899  | 3.039581867   |
| H190 | 6.013509555  | 1.939223090  | 3.286398265   |
| H191 | 4.395881072  | 1.229729922  | 7.224774883   |
| H192 | -3.024754988 | -2.389668950 | 6.063484693   |
| H193 | -3.013318422 | -5.555725852 | 6.635092642   |
| H194 | -2.918277097 | -4.923553097 | 8.295339582   |
| H195 | -4.724950249 | -3.958142033 | 6.141657983   |
| H196 | -6.658202500 | -2.286115416 | 8.680102109   |
| H197 | 2.891677452  | 3.183782399  | 6.958702489   |
| H198 | -0.056067162 | -2.243490502 | 5.988538747   |
| H199 | -4.326494139 | 1.383766210  | 10.764249598  |
| H200 | -4.649051646 | -0.329569524 | 10.388979676  |
| H201 | -1.940353271 | -0.564658190 | 10.666123495  |
| H202 | 8.844197816  | -7.887193273 | 7.095371911   |
| H203 | -1.067128602 | -5.761979238 | -4.110243891  |
| H204 | -0.161024032 | -8.703738043 | 1.001800829   |
| H205 | -0.582285244 | -6.385552362 | -8.559352949  |
| H206 | 1.035777343  | -5.654961717 | -8.720857362  |
| H207 | -1.534256693 | -4.364064977 | -7.644998828  |
| H208 | -0.367726713 | 0.918847462  | -10.124568424 |
| H209 | -1.070366837 | -4.369817700 | -10.145176537 |
| H210 | -2.811153841 | -1.789591282 | -3.103564097  |
| H211 | -3.885322811 | -4.376193507 | -1.861476928  |
| H212 | -0.094458440 | -1.206610632 | -8.670687955  |
| H213 | -2.718616408 | -0.269086030 | -9.657251478  |
| H214 | 1.264187448  | -2.699742203 | -9.456914244  |
| H215 | -1.041658259 | -5.446701615 | -2.378424893  |
| H216 | 0.039400226  | -3.603022435 | -7.401582357  |
| H217 | 1.241582191  | -4.126197637 | -10.276114470 |
| H218 | -6.104489199 | -2.831147962 | -4.291940398  |
| H219 | -3.284723406 | -1.773181363 | -1.415718824  |
| H220 | 2.303209368  | -5.576604761 | -7.009570390  |
| H221 | -2.274291355 | -3.836958084 | -1.410719160  |
| H222 | -4.011159346 | 3.241630535  | 2.008290381   |
| H223 | -3.078255316 | 1.094901880  | 0.764671412   |
| H224 | -8.557432024 | 1.636555701  | 1.580071771   |
| H225 | -7.087021873 | 0.815547590  | -0.886877324  |
| H226 | -6.604278364 | 4.832563257  | 0.235206731   |
| H227 | -8.152662478 | 9.701675801  | 1.504750956   |
| H228 | -7.596721131 | 6.188186417  | 2.966118844   |
| H229 | -8.753377579 | 6.390732890  | 0.471049167   |
| H230 | -5.909052950 | 7.542978282  | 0.768842002   |
| H231 | -9.267895216 | 10.503640681 | -2.503631619  |

|      |              |              |              |
|------|--------------|--------------|--------------|
| H232 | -2.875888727 | 4.738938362  | 0.399990280  |
| H233 | -4.192910372 | 4.563498289  | -0.767127056 |
| H234 | -8.938134862 | 11.470729757 | -0.161760113 |
| H235 | -7.613833071 | 6.456860689  | -0.873986046 |
| H236 | -5.466660959 | 2.246930705  | -0.132837639 |
| H237 | -7.379337324 | 0.323631383  | 1.503785905  |
| H238 | -9.335447781 | 2.656977422  | -2.808797831 |
| H239 | -1.213802109 | 1.439252560  | -2.983740339 |
| H240 | -9.798530864 | 0.949756955  | -2.690295331 |
| H241 | 9.122923300  | 1.961836997  | 5.840565106  |
| H242 | 7.771810017  | 2.315764196  | 4.990485967  |
| H243 | 2.699221698  | 5.841564733  | -0.856451198 |
| H244 | -0.083716809 | 5.991347262  | 0.006817348  |
| H245 | 2.653600608  | 8.206224231  | 0.378109010  |
| H246 | -2.305463987 | 3.727536765  | -2.454712029 |
| H247 | -3.495703869 | 4.588830356  | -4.186575984 |
| H248 | -3.301613500 | 5.871223818  | -3.288237761 |
| H249 | -3.814614831 | 1.846701319  | -5.093327456 |
| H250 | -5.462314777 | 1.885938796  | -5.790819332 |
| H251 | 1.781789531  | 12.143802651 | -2.312143454 |
| H252 | 0.530985730  | 13.411617429 | -2.448672731 |
| H253 | 1.266157534  | 9.996909426  | -3.063978625 |
| H254 | -0.378726828 | 9.515741944  | -3.421626333 |
| H255 | -0.200621912 | 9.064483530  | -6.888459443 |
| H256 | -0.081194431 | 4.585458861  | -6.325384563 |
| H257 | -5.730433129 | 9.366262274  | -2.613514135 |
| H258 | -2.157259982 | 8.952253646  | 0.825069106  |
| H259 | -2.375287803 | 7.928766289  | -4.354328821 |
| H260 | 2.829056223  | 4.687630644  | -3.269110995 |
| H261 | 4.170180871  | 6.595553156  | -2.500157499 |
| H262 | 0.351769374  | 4.551921237  | -3.670397430 |
| H263 | -7.557089705 | 0.305566767  | -3.207807609 |
| H264 | 5.817651588  | 9.230858597  | -3.379699841 |
| H265 | -5.162710331 | -0.396063112 | -4.503137961 |
| H266 | 3.045973180  | 5.527849515  | -4.810901966 |
| H267 | -2.166843622 | 7.435572481  | -1.120677639 |
| H268 | -5.618528633 | 3.900335524  | -4.372523595 |
| H269 | 5.126008137  | 9.850981944  | -1.866812149 |
| H270 | 0.417342348  | 7.501912168  | -7.303031636 |
| H271 | -2.137639165 | 9.121415960  | -5.573866253 |
| H272 | -4.467384868 | -3.114825114 | -4.478261366 |
| H273 | -5.562665043 | -2.640495330 | -2.059184191 |
| H274 | -5.647799835 | 10.974109011 | -0.729278458 |
| H275 | -4.761377926 | 1.967580949  | -2.800971120 |
| H276 | 1.735630904  | 7.481252600  | -3.965674324 |
| H277 | 1.107828321  | 5.890363713  | -6.305205451 |
| H278 | 1.384821050  | 3.700876643  | -4.800526500 |
| H279 | -1.436319341 | 5.886717507  | -4.665471423 |
| H280 | 1.388816996  | 9.467662168  | 2.655410002  |
| H281 | 0.866817512  | 10.279086847 | -0.521080939 |
| H282 | 1.294674974  | 13.150448064 | -0.134188915 |
| H283 | 3.025462823  | 9.737534067  | 2.016292056  |
| H284 | -1.320729705 | 11.121948336 | 0.588016041  |
| H285 | 6.499139546  | -3.640601249 | -7.702644134 |
| H286 | 6.160683728  | -5.098199434 | -6.752191575 |
| H287 | 8.206431945  | -6.011102827 | -2.422107406 |
| H288 | 7.026900026  | -5.762609671 | -8.865873002 |
| H289 | 5.422389695  | -6.087141223 | -8.935272952 |
| H290 | 6.214089856  | 4.459872600  | 0.803669167  |
| H291 | 6.332483734  | 7.295713553  | 2.040496918  |
| H292 | 6.640767123  | 7.362535374  | -2.245581164 |

|      |              |               |              |
|------|--------------|---------------|--------------|
| H293 | 4.798355716  | 5.511293607   | 1.129247376  |
| H294 | 7.734211819  | 7.667893541   | 1.285098144  |
| H295 | 6.757609390  | 2.499199425   | -4.961181805 |
| H296 | 7.287061868  | 6.215908011   | -0.514944666 |
| H297 | 3.052967298  | -6.869794674  | 6.272427022  |
| H298 | 5.215784400  | -8.276468871  | 4.616676319  |
| H299 | 5.267450320  | 0.860326806   | -5.737562785 |
| H300 | 3.719272976  | -0.139458348  | 3.886043666  |
| H301 | 2.847861054  | 1.170157666   | -8.281007839 |
| H302 | -0.081974011 | -2.351626952  | -4.451934690 |
| H303 | 2.203696970  | 1.720249581   | -6.733957538 |
| H304 | 2.600394977  | -4.362769910  | 5.385342986  |
| H305 | 3.652853774  | -0.325446001  | -5.784946562 |
| H306 | 2.701120945  | -4.994777310  | 3.738818982  |
| H307 | 2.995174669  | -7.271813910  | 4.541250032  |
| H308 | 5.050868150  | -5.770772201  | 4.195371152  |
| H309 | 4.893995427  | -5.240640149  | 5.879316730  |
| H310 | -3.378952511 | -0.716684802  | -7.444738137 |
| H311 | 3.361623011  | -9.398731669  | 6.688922931  |
| H312 | 2.475349494  | -11.853904264 | 5.058880261  |
| H313 | 1.356831883  | -0.365546380  | -3.934746142 |
| H314 | 3.291995435  | -11.658536817 | 7.852981220  |
| H315 | 1.800518225  | -11.881472100 | 7.212841374  |
| H316 | 4.420389352  | -3.442221144  | 3.201734378  |
| H317 | 0.795122685  | 1.826915346   | -4.836590152 |
| H318 | -1.972981683 | -2.114413886  | -6.052272509 |
| H319 | 6.594318296  | -10.639699206 | 0.927727387  |
| H320 | 6.640348871  | -8.582879622  | -1.861711050 |
| H321 | 5.397352808  | -8.753875087  | 1.906172648  |
| H322 | 6.060258221  | -11.305845458 | -0.358260979 |
| H323 | 7.402517304  | 1.698741045   | -7.801115541 |
| H324 | 5.776354078  | -5.632365403  | 1.464304837  |
| H325 | 1.391835453  | -7.417505065  | 1.757355204  |
| H326 | 4.928220737  | -2.516252808  | -6.467404093 |
| H327 | 2.112706058  | -9.284035129  | 0.206127713  |
| H328 | 4.230428570  | -7.373363101  | -5.921565837 |
| H329 | 3.122163006  | -5.699458017  | -4.356100154 |
| H330 | 3.919378029  | -12.568458946 | 5.786141462  |
| H331 | 4.366242754  | -1.258146570  | 2.718632812  |
| H332 | 7.284792270  | -6.556003299  | 3.078441047  |
| H333 | 6.662719678  | -4.395490274  | 1.789240038  |
| H334 | 7.152770327  | -7.471162099  | 5.285320434  |
| H335 | 2.908306447  | -2.538021802  | 6.319357532  |
| H336 | 2.345269060  | -12.000725384 | -2.528396664 |
| H337 | 3.375200252  | -8.602475784  | -2.501188354 |
| H338 | 4.351620408  | -8.902581036  | -1.051692742 |
| H339 | 1.290518895  | -8.676063166  | -1.260148627 |
| H340 | 2.715534439  | -2.446655754  | -5.515832122 |
| H341 | -1.085579585 | 2.084214378   | -6.490943539 |
| H342 | -3.139330778 | 1.046414350   | -7.560805046 |
| H343 | 1.442945468  | -5.738682162  | 1.122808774  |
| H344 | 7.174875328  | -8.108798720  | 3.056323315  |
| H345 | 5.729836482  | -9.846242163  | 2.958209015  |
| H346 | 2.574229954  | -0.932920732  | 5.797279641  |
| H347 | 6.301396764  | -8.454380355  | -4.860291835 |
| H348 | 6.323382117  | -7.023655461  | -1.087795164 |
| H349 | 2.093574964  | -3.244585098  | -6.995594814 |
| H350 | 6.121879979  | 3.660372993   | -6.153856886 |
| H351 | 5.766457976  | -0.511030374  | 6.062774233  |
| H352 | 6.461246867  | -0.189629298  | 4.454969404  |
| H353 | 9.703987393  | -7.436633072  | -3.526418037 |

|       |              |               |               |
|-------|--------------|---------------|---------------|
| H354  | 8.854100864  | -8.785772192  | -3.161054816  |
| H355  | 9.409966944  | -9.701843350  | 1.301045205   |
| H356  | 8.045219047  | -9.082983525  | -0.425457834  |
| H357  | 11.384103124 | -8.834970676  | -0.391608484  |
| H358  | 9.363848133  | -7.989016417  | 1.779411157   |
| H359  | 8.911722166  | -0.999274299  | 5.325529535   |
| H360  | -2.171426105 | 13.577367947  | 2.519401279   |
| H361  | 7.565123451  | -7.469481921  | 8.268260026   |
| H362  | 7.640225847  | -5.056377395  | 6.953296840   |
| H363  | -3.508430510 | 12.830152839  | -0.099336288  |
| H364  | -3.291122705 | 10.739589430  | 2.155337820   |
| H365  | -4.789875035 | 11.482388183  | 1.569109615   |
| H366  | -4.725293506 | 7.565025104   | -3.597571311  |
| H367  | 2.325608453  | -1.217041379  | 0.325678717   |
| H368  | -0.038855744 | -1.129614652  | -0.474165538  |
| Mo369 | 3.895767117  | -4.733162072  | -1.240061301  |
| N370  | -7.112137062 | -6.341870040  | -2.216027292  |
| N371  | -9.319475909 | -3.603567157  | -0.947709226  |
| N372  | -9.879964183 | -3.825770006  | 1.822521379   |
| N373  | -7.620462076 | -5.158720706  | 2.822972144   |
| N374  | -5.530200989 | -3.255153820  | 2.261300559   |
| N375  | -6.415387659 | -1.132658651  | 3.947505750   |
| N376  | -6.619081906 | -2.318543623  | 6.586788699   |
| N377  | -4.322522080 | -3.981537136  | 7.083928294   |
| N378  | -2.052921729 | -2.624605095  | 6.253067764   |
| N379  | -2.099953278 | 0.356286411   | 6.413733152   |
| N380  | -3.515207177 | 0.625557138   | 8.940390044   |
| N381  | 2.672664366  | -11.364598044 | 7.094861453   |
| N382  | 3.965580238  | -9.355068188  | 5.861117258   |
| N383  | 3.939114818  | -3.354695206  | 4.102456548   |
| N384  | 2.840812548  | -1.880738651  | 5.549276336   |
| N385  | 3.794516726  | -1.103370060  | 3.571168312   |
| N386  | 6.919187638  | -7.509709526  | 6.302064428   |
| N387  | -5.174872181 | -2.423088246  | -4.172961177  |
| N388  | -1.459385804 | -5.282515275  | -3.295707075  |
| N389  | -5.328031575 | 0.158421591   | -3.648655029  |
| N390  | -7.775408904 | 1.291720066   | -3.085900816  |
| N391  | -7.812465409 | 1.273951021   | -0.319751778  |
| N392  | -5.630926410 | 2.774916623   | 0.725119502   |
| N393  | -2.316658438 | 2.903282172   | -1.834486608  |
| N394  | -2.044745590 | 0.815785866   | -1.101801541  |
| N395  | -6.202677000 | 5.458266283   | 0.929352248   |
| N396  | -8.654811624 | 8.637664274   | -1.611046598  |
| N397  | -8.787203850 | 10.494344444  | -0.402234215  |
| N398  | 8.373354121  | 1.541574159   | 5.285643468   |
| N399  | 7.072426310  | 6.903126487   | 1.448756419   |
| N400  | 5.951976293  | 7.930489877   | -1.758929221  |
| N401  | 3.512871461  | 7.264054116   | -2.933399505  |
| N402  | -0.700375979 | 6.281036040   | -5.289690093  |
| N403  | -0.075263355 | 8.089063053   | -6.639307674  |
| N404  | -1.751092499 | 8.337878127   | -5.053623384  |
| N405  | 1.774677607  | 6.317836894   | -0.873724195  |
| N406  | 1.795212351  | 8.549374914   | 0.819768717   |
| N407  | 0.910096706  | 11.125482049  | 0.048428400   |
| N408  | 0.261870758  | 10.214070742  | -3.046050579  |
| N409  | -1.635692041 | 12.083472518  | 0.485658468   |
| N410  | 6.104601887  | -5.323386755  | -8.912034769  |
| N411  | 4.159419979  | -3.028909869  | -6.912837349  |
| N412  | 3.194543925  | -0.135952043  | -6.703751252  |
| N413  | 5.307657857  | 1.738824231   | -6.272659447  |
| N414  | 0.699780934  | -3.279113437  | -10.091241803 |

|      |              |               |              |
|------|--------------|---------------|--------------|
| N415 | -1.061991620 | -1.269047854  | -9.006057926 |
| N416 | 8.753544754  | -7.788839558  | -3.378320802 |
| N417 | 4.697690889  | -6.229894054  | -2.989930493 |
| N418 | 4.582824009  | -7.146553389  | -4.995889712 |
| N419 | 8.811831828  | -8.439660287  | -0.231305833 |
| N420 | 0.418049500  | 1.703665298   | 0.863898158  |
| N421 | 1.170856105  | 1.104630191   | 0.266616815  |
| O422 | -7.310240411 | -4.339569345  | -0.171104149 |
| O423 | -8.703783699 | -1.905275999  | 2.165700459  |
| O424 | -8.111594022 | -4.359027994  | 4.908467812  |
| O425 | -4.545378766 | -4.030818125  | 4.160274538  |
| O426 | -4.238170121 | -0.504463458  | 4.138591359  |
| O427 | -5.885199889 | -0.296829558  | 7.361033863  |
| O428 | -4.673353238 | -3.683110633  | 9.332591695  |
| O429 | -0.671402178 | -4.271297729  | 7.069360915  |
| O430 | 0.029426605  | -0.069193559  | 7.125170308  |
| O431 | -1.801968075 | 2.007962630   | 9.492744601  |
| O432 | -2.662688105 | 0.235478758   | 12.398538801 |
| O433 | 4.849799747  | -10.739272479 | 4.232186848  |
| O434 | 5.294441453  | -7.884293754  | 7.884953846  |
| O435 | 9.515612207  | -5.435999678  | 7.662051000  |
| O436 | -5.516320285 | -0.144314667  | -1.378723946 |
| O437 | -2.989154103 | -4.217900019  | -4.598107716 |
| O438 | -6.944710855 | 3.415461905   | -3.262155466 |
| O439 | -4.798592522 | 3.642099034   | -4.871312571 |
| O440 | -9.879105117 | 2.284249213   | -0.284950336 |
| O441 | -6.550769803 | 2.651350711   | 2.812563425  |
| O442 | -4.599769295 | 5.693329665   | 2.536812416  |
| O443 | -7.047830682 | 8.154173791   | 3.044054474  |
| O444 | 8.422869406  | -1.354374900  | 7.276524450  |
| O445 | 2.833995834  | 4.782188089   | 4.781685353  |
| O446 | 4.775428049  | 8.247917188   | 0.167652800  |
| O447 | 3.061387302  | 9.478959830   | -3.360289085 |
| O448 | 0.052547109  | 7.059867593   | -2.189551358 |
| O449 | -0.204692010 | 7.882791286   | 1.720944944  |
| O450 | 2.550599572  | 5.794935967   | 2.061135176  |
| O451 | 1.756070526  | 12.042837551  | 1.965557671  |
| O452 | -1.116762145 | 14.142848335  | -0.342212485 |
| O453 | -1.434525558 | 11.738369199  | -2.903485472 |
| O454 | -4.071648533 | 14.181139233  | 2.072904626  |
| O455 | -3.913549860 | 7.437814002   | -3.069894885 |
| O456 | 3.529704418  | -4.980315058  | -7.951712098 |
| O457 | 1.855679576  | -1.077008250  | -8.309110763 |
| O458 | 4.217944772  | 3.269064212   | -7.576556083 |
| O459 | 8.722871300  | 2.837286752   | -6.739969379 |
| O460 | -2.740964009 | -2.588386754  | -9.812643824 |
| O461 | -0.392597705 | -6.621167210  | -5.945898731 |
| O462 | 1.720847537  | -5.996664220  | -6.300869628 |
| O463 | -1.518991622 | 2.278010455   | -9.138005620 |
| O464 | 9.935411267  | -6.521846466  | -0.660924150 |
| O465 | 11.944264040 | -8.357312549  | 1.512065058  |
| O466 | -0.678674209 | -6.062320399  | -0.375651709 |
| O467 | -0.732349322 | -8.122174567  | 0.464673974  |
| O468 | 4.286774200  | -11.385748237 | -1.493798280 |
| O469 | 2.251356262  | -11.031793925 | -2.406533457 |
| O470 | 4.653991209  | -6.316570384  | 0.194519394  |
| O471 | 3.933231737  | -7.945029864  | 1.578737607  |
| O472 | 2.435901303  | -6.263361195  | -1.213650029 |
| O473 | 7.615767139  | -7.365023248  | 3.547066993  |
| O474 | 6.344741955  | -5.236250637  | 2.174217850  |
| O475 | -2.812435994 | 5.140618861   | -3.723609844 |

|                          |                         |              |               |              |
|--------------------------|-------------------------|--------------|---------------|--------------|
|                          | O476                    | 6.860557270  | -11.263339057 | 0.205069628  |
|                          | O477                    | 6.149242452  | -9.339889877  | 2.215786904  |
|                          | S478                    | 4.745667277  | 4.663160048   | -1.138665182 |
|                          | S479                    | 2.817489654  | 1.695361239   | -2.405297153 |
|                          | S480                    | 2.594035103  | -3.534621499  | -2.817752883 |
|                          | S481                    | 3.883525135  | 1.308079535   | 0.957550922  |
|                          | S482                    | 0.762097046  | -1.186326180  | -1.572400370 |
|                          | S483                    | 5.128649775  | -1.069081424  | -4.304581897 |
|                          | S484                    | 3.223515551  | -3.649673551  | 0.770928420  |
|                          | S485                    | 6.397556996  | 1.180014960   | -1.598953556 |
|                          | S486                    | 6.060313956  | -3.774779059  | -1.614135776 |
|                          | S487                    | 6.292606382  | -1.499015594  | 1.359136788  |
| <b>6<sup>-2</sup>(c)</b> | bmlcnx2b262n2x351.car_1 |              |               |              |
| Fe( 139) 0.567 -2.514    | C1                      | -8.245065003 | -4.452516935  | -0.970747421 |
| Fe( 140) 0.333 -0.249    | C2                      | -8.329628809 | -5.587442147  | -1.997294845 |
| Fe( 141) 0.567 -2.830    | C3                      | -9.303577854 | -2.409861062  | -0.108571674 |
| Fe( 142) 0.562 2.679     | C4                      | -9.264502062 | -2.690827762  | 1.391539734  |
| Fe( 143) 0.610 3.203     | C5                      | -9.840846948 | -4.191318299  | 3.226107169  |
| Fe( 144) 0.482 1.770     | C6                      | -8.441835108 | -4.565126905  | 3.729136034  |
| Fe( 145) 0.386 -1.623    | C7                      | -6.232420885 | -5.443166388  | 3.141056042  |
| <b>S=3/2</b>             | C8                      | -5.358302077 | -4.188283151  | 3.235688839  |
|                          | C9                      | -4.792268438 | -2.000619687  | 2.318322579  |
|                          | C10                     | -5.119642175 | -1.151950419  | 3.555086729  |
|                          | C11                     | -6.796012159 | -0.355837021  | 5.120208951  |
|                          | C12                     | -6.379986713 | -0.991284138  | 6.454284617  |
|                          | C13                     | -6.443764811 | -2.991617768  | 7.866637556  |
|                          | C14                     | -5.054479012 | -3.570756885  | 8.160358511  |
|                          | C15                     | -3.035939201 | -4.634472944  | 7.242931306  |
|                          | C16                     | -1.803159718 | -3.815365896  | 6.850478794  |
|                          | C17                     | -1.001525163 | -1.754642277  | 5.722080912  |
|                          | C18                     | -0.974136398 | -0.413188683  | 6.478133248  |
|                          | C19                     | -1.098148088 | -1.608670287  | 4.180407832  |
|                          | C20                     | -0.109669072 | -0.573546863  | 3.636484758  |
|                          | C21                     | -0.896610164 | -2.969016622  | 3.503205875  |
|                          | C22                     | -2.184990318 | 1.636393660   | 7.112393664  |
|                          | C23                     | -2.480078070 | 1.436389349   | 8.611521882  |
|                          | C24                     | -3.199169071 | 2.587243737   | 6.432594913  |
|                          | C25                     | -3.371919040 | 3.879897624   | 7.240167551  |
|                          | C26                     | -2.765846411 | 2.910085479   | 4.996461024  |
|                          | C27                     | -3.892258023 | 0.461947673   | 10.326398108 |
|                          | C28                     | -2.723340353 | 0.031962305   | 11.189655147 |
|                          | C29                     | 3.275393103  | -11.665181981 | 5.786311280  |
|                          | C30                     | 4.122008143  | -10.525090413 | 5.221782259  |
|                          | C31                     | 4.675772632  | -8.114228355  | 5.555599891  |
|                          | C32                     | 5.665122151  | -7.821271057  | 6.698339501  |
|                          | C33                     | 3.669300467  | -6.965205380  | 5.361686145  |
|                          | C34                     | 4.334114248  | -5.631490729  | 5.014977792  |
|                          | C35                     | 3.304733754  | -4.592877568  | 4.572345120  |
|                          | C36                     | 3.542601743  | -2.110117052  | 4.408006462  |
|                          | C37                     | 7.973339734  | -7.236845114  | 7.264395751  |
|                          | C38                     | 8.415067811  | -5.789327224  | 7.282135551  |
|                          | C39                     | -4.919733977 | -2.075978699  | -2.773108975 |
|                          | C40                     | -5.277648472 | -0.603687883  | -2.520036515 |
|                          | C41                     | -3.443587521 | -2.295185745  | -2.372304023 |
|                          | C42                     | -3.021470266 | -3.769678154  | -2.207507964 |
|                          | C43                     | -2.484220743 | -4.438014546  | -3.470767502 |
|                          | C44                     | -5.389642056 | 1.601155285   | -3.627946254 |
|                          | C45                     | -6.780979112 | 2.171744177   | -3.325855975 |
|                          | C46                     | -4.831769373 | 2.203668251   | -4.933303346 |
|                          | C47                     | -9.012222581 | 1.676888103   | -2.436077059 |



|      |              |              |              |
|------|--------------|--------------|--------------|
| C48  | -8.935191129 | 1.783916262  | -0.904110793 |
| C49  | -7.617289093 | 1.332523980  | 1.122542202  |
| C50  | -6.553791906 | 2.307361980  | 1.636012463  |
| C51  | -4.569710988 | 3.682135737  | 1.175176984  |
| C52  | -5.135877582 | 5.026075249  | 1.654747126  |
| C53  | -3.614518009 | 4.014861588  | 0.013825095  |
| C54  | -2.953135465 | 2.822843108  | -0.591079623 |
| C55  | -2.787740020 | 1.521527978  | -0.161006731 |
| C56  | -1.810982459 | 1.626843429  | -2.071604161 |
| C57  | -6.686989038 | 6.827076164  | 1.034195544  |
| C58  | -7.125607229 | 7.088179413  | 2.473299083  |
| C59  | -7.887603609 | 6.965065529  | 0.066886489  |
| C60  | -8.289017951 | 8.364146822  | -0.299535447 |
| C61  | -8.366374416 | 9.511388926  | 0.466598369  |
| C62  | -8.950837546 | 9.940042192  | -1.627955545 |
| C63  | 7.610522972  | 0.611880681  | 6.118800031  |
| C64  | 8.388133082  | -0.683773246 | 6.251197050  |
| C65  | 6.261947367  | 0.256033573  | 5.441171765  |
| C66  | 5.348115629  | 1.448232683  | 5.284638404  |
| C67  | 4.451134367  | 1.817024113  | 6.305164396  |
| C68  | 5.368214300  | 2.226716758  | 4.114399756  |
| C69  | 3.602360242  | 2.920450826  | 6.164997966  |
| C70  | 4.535654839  | 3.337370782  | 3.964034990  |
| C71  | 3.649976529  | 3.681170723  | 4.990094508  |
| C72  | 6.466433997  | 6.491439135  | 0.169231157  |
| C73  | 5.646218117  | 7.621910693  | -0.464912179 |
| C74  | 5.578696705  | 5.260123488  | 0.405108876  |
| C75  | 5.231182807  | 8.951754305  | -2.491370432 |
| C76  | 3.823450511  | 8.574261453  | -2.958512805 |
| C77  | 2.185674953  | 6.750963593  | -3.278401213 |
| C78  | 1.238101701  | 6.714926967  | -2.059047793 |
| C79  | 2.343711158  | 5.383701436  | -3.967703847 |
| C80  | 1.072590143  | 4.703559412  | -4.484682157 |
| C81  | 0.369601470  | 5.358641952  | -5.685241954 |
| C82  | -0.848942299 | 7.540676777  | -5.677360131 |
| C83  | 0.927805937  | 6.283690784  | 0.318807983  |
| C84  | 0.780880679  | 7.653565847  | 1.008358507  |
| C85  | 1.411577718  | 5.268555776  | 1.364813100  |
| C86  | 1.966260608  | 9.665970716  | 1.738382698  |
| C87  | 1.544287083  | 11.051071497 | 1.257515088  |
| C88  | 0.577903930  | 12.422021555 | -0.539385036 |
| C89  | -0.808868803 | 12.964182352 | -0.128253242 |
| C90  | 0.736736665  | 12.399802971 | -2.075176848 |
| C91  | -0.242977291 | 11.435326124 | -2.734281638 |
| C92  | -3.016975915 | 12.424174055 | 0.797285110  |
| C93  | -3.085015836 | 13.493136134 | 1.882287711  |
| C94  | -3.786982540 | 11.158621842 | 1.261891144  |
| C95  | -3.879702585 | 10.117246076 | 0.169892848  |
| C96  | -4.883060674 | 10.203021731 | -0.806976129 |
| C97  | -2.932086642 | 9.086215124  | 0.060251313  |
| C98  | -4.930621072 | 9.304699640  | -1.875736811 |
| C99  | -2.948586168 | 8.194181420  | -1.016905107 |
| C100 | -3.945776645 | 8.321734064  | -1.981288772 |
| C101 | 5.890955934  | -4.558396458 | -7.678475020 |
| C102 | 4.421736572  | -4.197813353 | -7.532856492 |
| C103 | 2.824972597  | -2.532287025 | -6.610486586 |
| C104 | 2.573547850  | -1.179028496 | -7.284972333 |
| C105 | 3.069409662  | 1.217753675  | -7.207599671 |
| C106 | 4.264071564  | 2.151930616  | -7.039444541 |
| C107 | 6.441098804  | 2.617945729  | -6.016258627 |
| C108 | 7.622451851  | 2.356337687  | -6.928849153 |

|       |               |               |              |
|-------|---------------|---------------|--------------|
| C109  | -0.581546064  | -3.642490715  | -9.471460598 |
| C110  | -1.550376537  | -2.453936945  | -9.455813107 |
| C111  | -0.518041632  | -4.276025206  | -8.062208114 |
| C112  | 0.124510013   | -5.674916189  | -8.106012184 |
| C113  | 0.446294495   | -6.154851550  | -6.708466003 |
| C114  | -1.910651777  | -0.100480810  | -8.907417095 |
| C115  | -1.187064354  | 1.130201898   | -9.415370673 |
| C116  | -2.616725106  | 0.081180050   | -7.542120707 |
| C117  | -1.627397169  | -0.001945039  | -6.413846370 |
| C118  | -0.864189905  | 1.114861428   | -6.041400191 |
| C119  | -1.347812262  | -1.245037703  | -5.820156806 |
| C120  | 0.195300450   | 0.971698374   | -5.140875779 |
| C121  | -0.281894770  | -1.386491099  | -4.928234713 |
| C122  | 0.509643262   | -0.280773159  | -4.609408362 |
| C123  | 8.157723776   | -7.087753629  | -2.219634185 |
| C124  | 9.016651919   | -7.305177942  | -0.962614866 |
| C125  | 6.688240012   | -7.485726648  | -2.006591567 |
| C126  | 5.746567108   | -7.129571151  | -3.115693265 |
| C127  | 5.674303422   | -7.705693016  | -4.369477315 |
| C128  | 4.012714705   | -6.262600978  | -4.123630098 |
| C129  | 9.617871423   | -8.674816232  | 0.952904479  |
| C130  | 11.098582796  | -8.591238576  | 0.655545883  |
| C131  | -0.098400936  | -6.909738122  | 0.276494806  |
| C132  | 1.280352561   | -6.784180223  | 0.860997712  |
| C133  | 2.417843394   | -7.154709546  | -0.178340518 |
| C134  | 2.214104320   | -8.620367764  | -0.667351281 |
| C135  | 3.387983639   | -9.117448999  | -1.527625204 |
| C136  | 3.380098193   | -10.596532293 | -1.784086610 |
| C137  | 3.762623279   | -7.130311895  | 0.610979288  |
| C138  | 4.057869527   | -1.152516612  | -1.206120171 |
| Fe139 | 4.565154015   | -2.435668113  | -2.631614433 |
| Fe140 | 2.425835420   | 0.155740171   | -0.646375894 |
| Fe141 | 5.336065841   | -0.056035529  | -0.041413382 |
| Fe142 | 4.537819225   | 0.164406356   | -2.534510826 |
| Fe143 | 4.486791921   | 2.316695472   | -0.948895275 |
| Fe144 | 4.936671787   | -2.561109457  | -0.086628393 |
| Fe145 | 2.544820630   | -2.350783198  | -0.885334045 |
| H146  | -6.722627348  | -6.641976457  | -1.315325749 |
| H147  | -6.395523570  | -5.743962240  | -2.637031859 |
| H148  | -10.013164474 | -3.675054770  | -1.676816810 |
| H149  | -8.678412565  | -5.172937995  | -2.956388335 |
| H150  | -9.125708958  | -6.270625694  | -1.653686703 |
| H151  | -8.431091528  | -1.776369121  | -0.323076872 |
| H152  | -10.335375429 | -4.426852571  | 1.143355124  |
| H153  | -10.210114641 | -1.830601851  | -0.330464171 |
| H154  | -10.511650388 | -5.046680345  | 3.380534951  |
| H155  | -7.902359172  | -5.168686932  | 1.843267112  |
| H156  | -10.191259863 | -3.359886410  | 3.851827544  |
| H157  | -3.710395988  | -2.187522330  | 2.338525046  |
| H158  | -6.152645537  | -3.444794492  | 1.476461471  |
| H159  | -5.829140543  | -6.113351320  | 2.369974955  |
| H160  | -6.331946956  | 0.637648321   | 5.080788155  |
| H161  | -7.140765173  | -1.586489621  | 3.387943314  |
| H162  | -6.169960517  | -5.951786032  | 4.110726487  |
| H163  | -5.022028205  | -1.428378868  | 1.407678761  |
| H164  | -7.095997357  | -2.834622467  | 5.840582430  |
| H165  | -7.887765616  | -0.230250074  | 5.115783021  |
| H166  | -1.638298733  | -3.707383391  | 3.840290666  |
| H167  | -0.988573020  | -2.869091494  | 2.411043012  |
| H168  | 0.109857638   | -3.366459890  | 3.709374748  |
| H169  | -2.117198076  | -1.256034046  | 3.954206881  |

|      |              |              |               |
|------|--------------|--------------|---------------|
| H170 | -7.163518728 | -3.821424571 | 7.922823006   |
| H171 | -2.687893826 | 2.009672448  | 4.371254069   |
| H172 | -4.140897212 | 0.238646830  | 8.218493564   |
| H173 | -3.746046944 | 3.692379162  | 8.257035442   |
| H174 | -0.245419307 | -0.458934775 | 2.552738785   |
| H175 | 0.931545757  | -0.886440076 | 3.798317649   |
| H176 | 7.394961451  | 0.981156468  | 7.139910563   |
| H177 | -3.497751018 | 3.583762669  | 4.527089582   |
| H178 | -4.090690442 | 4.539762846  | 6.732297350   |
| H179 | -1.786899213 | 3.416651939  | 4.994711450   |
| H180 | -2.414105906 | 4.417834875  | 7.324210769   |
| H181 | -4.175919023 | 2.070668478  | 6.398611918   |
| H182 | -1.188048850 | 2.100263362  | 7.087303225   |
| H183 | -2.862312119 | 0.087832425  | 5.781187748   |
| H184 | -0.249056383 | 0.417654127  | 4.094116946   |
| H185 | 1.651524676  | 4.317826550  | 0.858758361   |
| H186 | 0.575730002  | 5.094521312  | 2.060334726   |
| H187 | 2.558952001  | 5.394945215  | 2.957444375   |
| H188 | 2.207502688  | 4.865224838  | 5.524223993   |
| H189 | 4.542185720  | 3.911665928  | 3.036897462   |
| H190 | 6.016831183  | 1.938045230  | 3.284027210   |
| H191 | 4.404769488  | 1.227125690  | 7.224561367   |
| H192 | -3.022107638 | -2.388747430 | 6.057240428   |
| H193 | -3.013385792 | -5.553273085 | 6.638169932   |
| H194 | -2.915961558 | -4.918294068 | 8.296852265   |
| H195 | -4.727031036 | -3.959685729 | 6.144629095   |
| H196 | -6.663244182 | -2.290015190 | 8.681849193   |
| H197 | 2.897320537  | 3.178774445  | 6.960028202   |
| H198 | -0.052510631 | -2.242333329 | 5.981319277   |
| H199 | -4.334694523 | 1.376873547  | 10.754138909  |
| H200 | -4.647356681 | -0.338477658 | 10.381514727  |
| H201 | -1.938982103 | -0.559970670 | 10.663225650  |
| H202 | 8.846778440  | -7.884115296 | 7.095994403   |
| H203 | -1.059505010 | -5.768117937 | -4.108815251  |
| H204 | -0.162353960 | -8.696209300 | 1.001162351   |
| H205 | -0.582263770 | -6.384436146 | -8.559883226  |
| H206 | 1.037414011  | -5.655267730 | -8.718653678  |
| H207 | -1.530686038 | -4.364308112 | -7.639151742  |
| H208 | -0.351538780 | 0.915731210  | -10.123473699 |
| H209 | -1.067956101 | -4.371035681 | -10.137976411 |
| H210 | -2.797024404 | -1.794323980 | -3.109094242  |
| H211 | -3.879318614 | -4.375059773 | -1.864075727  |
| H212 | -0.086207774 | -1.206063341 | -8.670645290  |
| H213 | -2.706075977 | -0.267620201 | -9.662627618  |
| H214 | 1.268094664  | -2.701163747 | -9.456548678  |
| H215 | -1.030680028 | -5.444408803 | -2.377575593  |
| H216 | 0.044108550  | -3.607030001 | -7.393766694  |
| H217 | 1.243600148  | -4.127147132 | -10.277251806 |
| H218 | -6.092331338 | -2.827576412 | -4.302376754  |
| H219 | -3.270440173 | -1.772420689 | -1.422502612  |
| H220 | 2.303279825  | -5.579281325 | -7.008878044  |
| H221 | -2.266994245 | -3.841563985 | -1.411803387  |
| H222 | -4.015333289 | 3.243838548  | 2.017627864   |
| H223 | -3.128243943 | 1.080187370  | 0.773788007   |
| H224 | -8.564631884 | 1.638113131  | 1.584639640   |
| H225 | -7.093275624 | 0.813454403  | -0.881284352  |
| H226 | -6.598460160 | 4.840980900  | 0.234579132   |
| H227 | -8.143821416 | 9.708935197  | 1.509111183   |
| H228 | -7.589649704 | 6.198390931  | 2.964840318   |
| H229 | -8.744524790 | 6.397183164  | 0.472308414   |
| H230 | -5.899281696 | 7.550250128  | 0.767977404   |

|      |              |              |              |
|------|--------------|--------------|--------------|
| H231 | -9.278277319 | 10.509980615 | -2.493582678 |
| H232 | -2.865772865 | 4.722076408  | 0.408657809  |
| H233 | -4.180939820 | 4.561410082  | -0.760368104 |
| H234 | -8.938117349 | 11.476864990 | -0.153978097 |
| H235 | -7.605979652 | 6.466426668  | -0.874672798 |
| H236 | -5.480659968 | 2.257586267  | -0.128446936 |
| H237 | -7.381640743 | 0.329161658  | 1.507655937  |
| H238 | -9.329694131 | 2.657393094  | -2.811857183 |
| H239 | -1.237327391 | 1.391491307  | -2.964041838 |
| H240 | -9.797982577 | 0.952413758  | -2.688952212 |
| H241 | 9.128761079  | 1.961434272  | 5.844376767  |
| H242 | 7.777990966  | 2.314722176  | 4.992383147  |
| H243 | 2.695031616  | 5.838325387  | -0.854795465 |
| H244 | -0.087141222 | 5.992151776  | 0.011004646  |
| H245 | 2.654155129  | 8.205946936  | 0.377970171  |
| H246 | -2.298665029 | 3.697063442  | -2.442499295 |
| H247 | -3.495430787 | 4.593165203  | -4.184542208 |
| H248 | -3.301900078 | 5.881110359  | -3.286343664 |
| H249 | -3.806422458 | 1.839916831  | -5.086508305 |
| H250 | -5.452781166 | 1.880771347  | -5.787298496 |
| H251 | 1.780266363  | 12.143528396 | -2.310215804 |
| H252 | 0.529445473  | 13.411342996 | -2.447934003 |
| H253 | 1.265244858  | 9.997146909  | -3.063178174 |
| H254 | -0.379318370 | 9.514325891  | -3.417740162 |
| H255 | -0.193662420 | 9.065970343  | -6.879312679 |
| H256 | -0.081541960 | 4.583871833  | -6.324190598 |
| H257 | -5.729210894 | 9.372927823  | -2.618583478 |
| H258 | -2.159237995 | 8.954924043  | 0.822723468  |
| H259 | -2.376492047 | 7.933750299  | -4.352995693 |
| H260 | 2.825438988  | 4.684572919  | -3.265681101 |
| H261 | 4.169369281  | 6.594265380  | -2.501546469 |
| H262 | 0.349576552  | 4.550116665  | -3.668687411 |
| H263 | -7.558575546 | 0.300652931  | -3.204197360 |
| H264 | 5.816750767  | 9.232443636  | -3.377375164 |
| H265 | -5.149653893 | -0.398346387 | -4.504058359 |
| H266 | 3.045111245  | 5.523126218  | -4.807594409 |
| H267 | -2.168641332 | 7.438530819  | -1.123170730 |
| H268 | -5.610018676 | 3.897440073  | -4.374047748 |
| H269 | 5.120544630  | 9.846868322  | -1.863609833 |
| H270 | 0.425519649  | 7.503763512  | -7.294161988 |
| H271 | -2.129936598 | 9.125823680  | -5.572051917 |
| H272 | -4.455931164 | -3.122871829 | -4.480804999 |
| H273 | -5.547761286 | -2.650613475 | -2.065810644 |
| H274 | -5.645933957 | 10.981249546 | -0.734584020 |
| H275 | -4.759187178 | 1.960527951  | -2.795646126 |
| H276 | 1.733986747  | 7.478223474  | -3.965829079 |
| H277 | 1.106819008  | 5.889001600  | -6.302958820 |
| H278 | 1.382797258  | 3.698470180  | -4.798460707 |
| H279 | -1.437865439 | 5.885789145  | -4.666329225 |
| H280 | 1.391283032  | 9.468279138  | 2.655695529  |
| H281 | 0.865490401  | 10.280354275 | -0.519711674 |
| H282 | 1.293617561  | 13.151685992 | -0.133131032 |
| H283 | 3.027113872  | 9.738232660  | 2.015225240  |
| H284 | -1.323684237 | 11.124924361 | 0.589653935  |
| H285 | 6.500090113  | -3.643129727 | -7.699635687 |
| H286 | 6.161725851  | -5.100407666 | -6.748511231 |
| H287 | 8.203395213  | -6.007596826 | -2.419998570 |
| H288 | 7.026835610  | -5.769924080 | -8.861674040 |
| H289 | 5.421001466  | -6.088009952 | -8.932433542 |
| H290 | 6.209200217  | 4.459567372  | 0.814380864  |
| H291 | 6.326790155  | 7.295846085  | 2.039795211  |

|      |              |               |              |
|------|--------------|---------------|--------------|
| H292 | 6.640314963  | 7.361941014   | -2.246192833 |
| H293 | 4.793782059  | 5.512576842   | 1.132050455  |
| H294 | 7.729329059  | 7.666352118   | 1.285151771  |
| H295 | 6.761275076  | 2.508550477   | -4.968542242 |
| H296 | 7.284653252  | 6.211335628   | -0.513246345 |
| H297 | 3.058167548  | -6.868844934  | 6.274605745  |
| H298 | 5.221513743  | -8.273047321  | 4.617703943  |
| H299 | 5.274106160  | 0.864048692   | -5.745153468 |
| H300 | 3.733456438  | -0.142540694  | 3.885045655  |
| H301 | 2.846969697  | 1.164632728   | -8.281635233 |
| H302 | -0.072596331 | -2.354986499  | -4.468232171 |
| H303 | 2.208620377  | 1.721127609   | -6.735805879 |
| H304 | 2.605794425  | -4.359975958  | 5.386095402  |
| H305 | 3.660951869  | -0.325691913  | -5.788836510 |
| H306 | 2.703183793  | -4.993342508  | 3.738615619  |
| H307 | 2.996847191  | -7.270545275  | 4.543730285  |
| H308 | 5.051260731  | -5.772315141  | 4.192093806  |
| H309 | 4.900026061  | -5.241091303  | 5.875963258  |
| H310 | -3.376952342 | -0.707828285  | -7.451347103 |
| H311 | 3.365011809  | -9.393733016  | 6.688536487  |
| H312 | 2.474420642  | -11.842795401 | 5.052149949  |
| H313 | 1.354710558  | -0.365763968  | -3.927106200 |
| H314 | 3.294650375  | -11.651976729 | 7.846610682  |
| H315 | 1.802490124  | -11.877987725 | 7.208460938  |
| H316 | 4.424615660  | -3.445208082  | 3.199131286  |
| H317 | 0.794090097  | 1.828691496   | -4.830321550 |
| H318 | -1.965606696 | -2.112201802  | -6.065415130 |
| H319 | 6.593254414  | -10.633910690 | 0.927335321  |
| H320 | 6.638526432  | -8.579488905  | -1.857928264 |
| H321 | 5.396949918  | -8.745731216  | 1.904924319  |
| H322 | 6.057962451  | -11.301273744 | -0.357274869 |
| H323 | 7.411917457  | 1.688254409   | -7.799331231 |
| H324 | 5.776798071  | -5.628167773  | 1.463597556  |
| H325 | 1.394202416  | -7.413288179  | 1.756642922  |
| H326 | 4.929652722  | -2.520830641  | -6.464068855 |
| H327 | 2.110872256  | -9.272950197  | 0.214699637  |
| H328 | 4.222606041  | -7.372669557  | -5.911803368 |
| H329 | 3.118886062  | -5.695360757  | -4.346483643 |
| H330 | 3.916787960  | -12.563357398 | 5.777525238  |
| H331 | 4.381733701  | -1.263123457  | 2.717318363  |
| H332 | 7.287810757  | -6.551586488  | 3.079178732  |
| H333 | 6.658357465  | -4.390468953  | 1.778442004  |
| H334 | 7.155161899  | -7.467777642  | 5.284194628  |
| H335 | 2.910211896  | -2.536579622  | 6.315674956  |
| H336 | 2.345394573  | -11.994010964 | -2.526182382 |
| H337 | 3.369030322  | -8.593490966  | -2.494997784 |
| H338 | 4.346290168  | -8.895472614  | -1.046198805 |
| H339 | 1.285017912  | -8.671347265  | -1.252491168 |
| H340 | 2.717284754  | -2.453078755  | -5.517464522 |
| H341 | -1.087251568 | 2.089516372   | -6.483856767 |
| H342 | -3.131837576 | 1.053652261   | -7.568910231 |
| H343 | 1.442639273  | -5.731883728  | 1.130316909  |
| H344 | 7.174998750  | -8.102818254  | 3.051314348  |
| H345 | 5.729073398  | -9.838878734  | 2.957901105  |
| H346 | 2.591851932  | -0.928052251  | 5.796035113  |
| H347 | 6.297215412  | -8.451971981  | -4.851658294 |
| H348 | 6.324694387  | -7.021411508  | -1.081414657 |
| H349 | 2.097106792  | -3.245872356  | -7.000295103 |
| H350 | 6.129449523  | 3.664801065   | -6.167046969 |
| H351 | 5.773445740  | -0.512648992  | 6.059628872  |
| H352 | 6.473136900  | -0.188249985  | 4.454847906  |

|       |              |               |              |
|-------|--------------|---------------|--------------|
| H353  | 9.696942336  | -7.432504673  | -3.531123902 |
| H354  | 8.848235043  | -8.782033008  | -3.163618071 |
| H355  | 9.412010859  | -9.700655833  | 1.297053315  |
| H356  | 8.043482808  | -9.079773007  | -0.425902591 |
| H357  | 11.382904207 | -8.835638599  | -0.396204028 |
| H358  | 9.365060964  | -7.987579559  | 1.776806055  |
| H359  | 8.910525661  | -0.997530769  | 5.315674033  |
| H360  | -2.177293991 | 13.572902050  | 2.526245045  |
| H361  | 7.567964221  | -7.460025453  | 8.266892263  |
| H362  | 7.645115316  | -5.052244752  | 6.946522251  |
| H363  | -3.510532957 | 12.835162961  | -0.098648200 |
| H364  | -3.292446955 | 10.741634152  | 2.152939044  |
| H365  | -4.792191289 | 11.483520383  | 1.567422302  |
| H366  | -4.727043705 | 7.573193665   | -3.600809692 |
| H367  | 2.321023380  | -1.179542992  | 0.360991955  |
| H368  | -0.085647992 | -1.085100744  | -0.376847524 |
| Mo369 | 3.871042114  | -4.726797068  | -1.264643022 |
| N370  | -7.108228265 | -6.344584269  | -2.215357974 |
| N371  | -9.307555012 | -3.599284647  | -0.948310308 |
| N372  | -9.878342241 | -3.821362079  | 1.821128406  |
| N373  | -7.623144260 | -5.157224827  | 2.823650955  |
| N374  | -5.532451410 | -3.254753481  | 2.265442168  |
| N375  | -6.417755038 | -1.132269340  | 3.951030474  |
| N376  | -6.623285263 | -2.321369780  | 6.588885182  |
| N377  | -4.322871620 | -3.979126012  | 7.086071760  |
| N378  | -2.050298471 | -2.624083321  | 6.247231856  |
| N379  | -2.099752765 | 0.355965841   | 6.406497942  |
| N380  | -3.516751249 | 0.620339333   | 8.932658522  |
| N381  | 2.673579170  | -11.359443443 | 7.089241929  |
| N382  | 3.970430634  | -9.351229230  | 5.861819228  |
| N383  | 3.943407519  | -3.356261345  | 4.100045177  |
| N384  | 2.844680301  | -1.879232975  | 5.545400472  |
| N385  | 3.799295306  | -1.105911014  | 3.566075007  |
| N386  | 6.922708476  | -7.505750995  | 6.301263066  |
| N387  | -5.160113969 | -2.425778429  | -4.178838400 |
| N388  | -1.451986325 | -5.287296650  | -3.294784437 |
| N389  | -5.322315496 | 0.153257902   | -3.648981633 |
| N390  | -7.772698780 | 1.287307660   | -3.081396389 |
| N391  | -7.815887214 | 1.278562540   | -0.315683578 |
| N392  | -5.636498321 | 2.779452445   | 0.734243270  |
| N393  | -2.319536838 | 2.875319961   | -1.821328624 |
| N394  | -2.087193327 | 0.784918782   | -1.086803181 |
| N395  | -6.195220746 | 5.466023847   | 0.928727450  |
| N396  | -8.656225084 | 8.646286359   | -1.606495820 |
| N397  | -8.787560291 | 10.501551806  | -0.396007662 |
| N398  | 8.379516163  | 1.541353642   | 5.289347933  |
| N399  | 7.066966675  | 6.902348123   | 1.448976512  |
| N400  | 5.949087809  | 7.927369813   | -1.759895579 |
| N401  | 3.511275176  | 7.262035346   | -2.934150987 |
| N402  | -0.702716912 | 6.279238528   | -5.287894825 |
| N403  | -0.069391931 | 8.089866013   | -6.631119653 |
| N404  | -1.749723021 | 8.339055452   | -5.052033441 |
| N405  | 1.770539299  | 6.313950206   | -0.872652958 |
| N406  | 1.795885112  | 8.549096779   | 0.820181804  |
| N407  | 0.908397818  | 11.126512544  | 0.050206819  |
| N408  | 0.260906362  | 10.213257364  | -3.042792314 |
| N409  | -1.638110574 | 12.086352975  | 0.485853349  |
| N410  | 6.106398961  | -5.327262797  | -8.908536361 |
| N411  | 4.161795345  | -3.030412307  | -6.915049616 |
| N412  | 3.199184987  | -0.136969291  | -6.703286832 |
| N413  | 5.311344375  | 1.743700745   | -6.277204900 |

|      |              |               |               |
|------|--------------|---------------|---------------|
| N414 | 0.701938007  | -3.280643580  | -10.089110549 |
| N415 | -1.054536184 | -1.268345482  | -9.003651796  |
| N416 | 8.747339456  | -7.784926683  | -3.379459524  |
| N417 | 4.696374979  | -6.221817765  | -2.984248851  |
| N418 | 4.578000416  | -7.143966626  | -4.987566882  |
| N419 | 8.811526133  | -8.437375072  | -0.233376319  |
| N420 | 0.413523716  | 1.727325004   | 0.793679694   |
| N421 | 1.157586559  | 1.099657663   | 0.218493612   |
| O422 | -7.296912652 | -4.334701333  | -0.172685213  |
| O423 | -8.702366638 | -1.901645014  | 2.167491807   |
| O424 | -8.115908515 | -4.359515446  | 4.909637335   |
| O425 | -4.547819999 | -4.033519677  | 4.163129627   |
| O426 | -4.239766056 | -0.507670004  | 4.147624396   |
| O427 | -5.894001375 | -0.299222506  | 7.366034606   |
| O428 | -4.675915472 | -3.682798432  | 9.334857659   |
| O429 | -0.671055803 | -4.270198898  | 7.069148238   |
| O430 | 0.029399995  | -0.068041778  | 7.119887140   |
| O431 | -1.805309488 | 2.003428700   | 9.487456523   |
| O432 | -2.666755320 | 0.242431772   | 12.392847856  |
| O433 | 4.853216590  | -10.732576994 | 4.230123929   |
| O434 | 5.299800045  | -7.883306364  | 7.885661780   |
| O435 | 9.522053150  | -5.430917024  | 7.651110829   |
| O436 | -5.515853014 | -0.154141734  | -1.380206358  |
| O437 | -2.983428971 | -4.227889450  | -4.599342402  |
| O438 | -6.939758389 | 3.409353987   | -3.261002954  |
| O439 | -4.788582415 | 3.636968440   | -4.868470808  |
| O440 | -9.880414203 | 2.293814960   | -0.287474498  |
| O441 | -6.563515557 | 2.660959232   | 2.818659151   |
| O442 | -4.593590090 | 5.698497263   | 2.538170048   |
| O443 | -7.038172768 | 8.162906383   | 3.042352582   |
| O444 | 8.436755271  | -1.359176075  | 7.269156302   |
| O445 | 2.831028299  | 4.773408570   | 4.780343394   |
| O446 | 4.767819187  | 8.239295651   | 0.164496846   |
| O447 | 3.061111808  | 9.476502071   | -3.365614400  |
| O448 | 0.051887755  | 7.064864332   | -2.188194487  |
| O449 | -0.202222700 | 7.883582178   | 1.725830968   |
| O450 | 2.549922553  | 5.787305782   | 2.060917730   |
| O451 | 1.758506154  | 12.043170155  | 1.965882697   |
| O452 | -1.116295326 | 14.145678641  | -0.340553030  |
| O453 | -1.435983323 | 11.737147455  | -2.901277193  |
| O454 | -4.073148634 | 14.184804966  | 2.072591854   |
| O455 | -3.914597966 | 7.443532675   | -3.074723530  |
| O456 | 3.531729644  | -4.982960849  | -7.951787638  |
| O457 | 1.861419886  | -1.076670384  | -8.308868721  |
| O458 | 4.220202730  | 3.266849364   | -7.587841284  |
| O459 | 8.728952145  | 2.836905872   | -6.744783639  |
| O460 | -2.735681772 | -2.585216517  | -9.809432623  |
| O461 | -0.391583522 | -6.625671243  | -5.945558092  |
| O462 | 1.721896211  | -6.000321522  | -6.300129965  |
| O463 | -1.503396204 | 2.279083719   | -9.142127512  |
| O464 | 9.937034070  | -6.520723739  | -0.663105227  |
| O465 | 11.945934407 | -8.356287446  | 1.505782588   |
| O466 | -0.683766962 | -6.050209856  | -0.365276529  |
| O467 | -0.736419386 | -8.111604337  | 0.470438371   |
| O468 | 4.285340165  | -11.376673769 | -1.492674752  |
| O469 | 2.248065939  | -11.025726052 | -2.402229573  |
| O470 | 4.653724059  | -6.306540965  | 0.167943854   |
| O471 | 3.939690384  | -7.917572808  | 1.571160811   |
| O472 | 2.422743052  | -6.260936695  | -1.226222875  |
| O473 | 7.616369745  | -7.361606952  | 3.544919015   |
| O474 | 6.351325407  | -5.233019561  | 2.167669406   |

|  |                             |              |               |              |
|--|-----------------------------|--------------|---------------|--------------|
|  | O475                        | -2.811849927 | 5.143246504   | -3.714670002 |
|  | O476                        | 6.859628081  | -11.256874080 | 0.204025034  |
|  | O477                        | 6.146599407  | -9.334176140  | 2.212908221  |
|  | S478                        | 4.743220221  | 4.655582159   | -1.134900406 |
|  | S479                        | 2.801355958  | 1.653290160   | -2.433925715 |
|  | S480                        | 2.604766911  | -3.519861030  | -2.867855367 |
|  | S481                        | 3.855531538  | 1.293079993   | 0.936348282  |
|  | S482                        | 0.661032381  | -1.271448879  | -1.498741867 |
|  | S483                        | 5.181282880  | -1.096970873  | -4.310521351 |
|  | S484                        | 3.171932237  | -3.695434129  | 0.779949265  |
|  | S485                        | 6.381932645  | 1.173625371   | -1.583444501 |
|  | S486                        | 6.052953731  | -3.774706939  | -1.578912056 |
|  | S487                        | 6.230482346  | -1.534571066  | 1.368694929  |
|  | <b>6<sup>-2</sup>(d)</b>    |              |               |              |
|  | Fe( 139)                    | 0.569        | 2.486         |              |
|  | Fe( 140)                    | 0.329        | 0.093         |              |
|  | Fe( 141)                    | 0.489        | 0.958         |              |
|  | Fe( 142)                    | 0.537        | -2.584        |              |
|  | Fe( 143)                    | 0.595        | 3.105         |              |
|  | Fe( 144)                    | 0.487        | -2.312        |              |
|  | Fe( 145)                    | 0.355        | -1.140        |              |
|  | <b>S=1/2</b>                |              |               |              |
|  | bm1cnx2b262n2x35147ta.car_2 |              |               |              |
|  | C1                          | -8.354999421 | -4.297789178  | 0.481378171  |
|  | C2                          | -8.515191197 | -5.636565366  | -0.248959303 |
|  | C3                          | -9.323150135 | -2.073211518  | 0.885558374  |
|  | C4                          | -9.212495098 | -1.999127546  | 2.407258434  |
|  | C5                          | -9.743560947 | -3.034518019  | 4.560801827  |
|  | C6                          | -8.330447208 | -3.317263665  | 5.084989550  |
|  | C7                          | -6.164648491 | -4.374300388  | 4.613356421  |
|  | C8                          | -5.259636773 | -3.161730520  | 4.375680743  |
|  | C9                          | -4.697401060 | -1.260241620  | 2.957900604  |
|  | C10                         | -4.944344288 | -0.146428108  | 3.985003913  |
|  | C11                         | -6.527434461 | 1.042090284   | 5.390862086  |
|  | C12                         | -6.055151464 | 0.711356686   | 6.814080970  |
|  | C13                         | -6.087552604 | -0.912132204  | 8.646295662  |
|  | C14                         | -4.689679130 | -1.436431494  | 8.997748254  |
|  | C15                         | -2.735823681 | -2.733272700  | 8.264052490  |
|  | C16                         | -1.508890663 | -2.073376864  | 7.628614440  |
|  | C17                         | -0.723590581 | -0.364770246  | 6.006706127  |
|  | C18                         | -0.649306186 | 1.111812320   | 6.439963916  |
|  | C19                         | -0.892797296 | -0.572350445  | 4.478392722  |
|  | C20                         | 0.081870790  | 0.281705786   | 3.661206383  |
|  | C21                         | -0.756776402 | -2.056305442  | 4.117566196  |
|  | C22                         | -1.790289459 | 3.283542902   | 6.620450385  |
|  | C23                         | -2.003740212 | 3.443153530   | 8.139208683  |
|  | C24                         | -2.823882543 | 4.080482188   | 5.789779813  |
|  | C25                         | -2.935420401 | 5.527502762   | 6.285325109  |
|  | C26                         | -2.452011849 | 4.059107584   | 4.301553227  |
|  | C27                         | -3.337865879 | 2.941217249   | 10.100820453 |
|  | C28                         | -2.139248877 | 2.685162916   | 10.991302046 |
|  | C29                         | 3.353661971  | -10.103221133 | 8.146971738  |
|  | C30                         | 4.208470462  | -9.158263058  | 7.303639535  |
|  | C31                         | 4.820571348  | -6.749733958  | 7.040758615  |
|  | C32                         | 5.873764052  | -6.236144409  | 8.041397650  |
|  | C33                         | 3.831481216  | -5.640601386  | 6.642860302  |
|  | C34                         | 4.499602509  | -4.447509310  | 5.957239938  |
|  | C35                         | 3.458896635  | -3.514549191  | 5.339750350  |
|  | C36                         | 3.736482184  | -1.144418934  | 4.600686387  |
|  | C37                         | 8.222957454  | -5.599727404  | 8.338717423  |
|  | C38                         | 8.683762879  | -4.198443434  | 7.997283898  |
|  | C39                         | -5.085904275 | -2.533938941  | -1.995550624 |
|  | C40                         | -5.427245578 | -1.037263172  | -2.063246177 |
|  | C41                         | -3.596558845 | -2.680611201  | -1.620388365 |
|  | C42                         | -3.172139268 | -4.081561791  | -1.137307396 |
|  | C43                         | -2.720034530 | -5.050704246  | -2.226421687 |
|  | C44                         | -5.536500411 | 0.868262717   | -3.634754347 |
|  | C45                         | -6.895078007 | 1.541354195   | -3.405479428 |
|  | C46                         | -5.029915753 | 1.140680392   | -5.065962739 |



|      |              |              |              |
|------|--------------|--------------|--------------|
| C47  | -9.089091470 | 1.348626577  | -2.330220733 |
| C48  | -8.932623882 | 1.813222362  | -0.873314267 |
| C49  | -7.528012570 | 1.805706941  | 1.144618600  |
| C50  | -6.436781885 | 2.854359453  | 1.372461547  |
| C51  | -4.438618073 | 4.014285759  | 0.525359336  |
| C52  | -4.937104370 | 5.456653224  | 0.690833037  |
| C53  | -3.527033555 | 4.010899367  | -0.715078573 |
| C54  | -2.958913147 | 2.671905153  | -1.045563238 |
| C55  | -2.839800356 | 1.496045012  | -0.331431195 |
| C56  | -1.955701732 | 1.097592776  | -2.248118027 |
| C57  | -6.473122372 | 7.119866229  | -0.265817544 |
| C58  | -6.818965591 | 7.711748669  | 1.099577891  |
| C59  | -7.736636774 | 7.071937974  | -1.158395861 |
| C60  | -8.131110147 | 8.356961834  | -1.823988252 |
| C61  | -8.148715305 | 9.654709929  | -1.350829893 |
| C62  | -8.847740745 | 9.590647461  | -3.452166665 |
| C63  | 7.936831724  | 1.763744718  | 5.450378669  |
| C64  | 8.721232838  | 0.526521781  | 5.847939306  |
| C65  | 6.557197843  | 1.286992385  | 4.926004633  |
| C66  | 5.651674463  | 2.433428466  | 4.540153866  |
| C67  | 4.824189922  | 3.068806253  | 5.486436056  |
| C68  | 5.621092239  | 2.907880663  | 3.216346062  |
| C69  | 3.994424335  | 4.136560918  | 5.126623519  |
| C70  | 4.806378961  | 3.978551150  | 2.845374639  |
| C71  | 3.988929545  | 4.589398635  | 3.800918940  |
| C72  | 6.573438931  | 6.125211605  | -1.631690925 |
| C73  | 5.736667865  | 7.095849182  | -2.473244137 |
| C74  | 5.673398906  | 5.031772265  | -1.039083209 |
| C75  | 5.260495845  | 7.961032796  | -4.724866325 |
| C76  | 3.821389367  | 7.537091958  | -5.024114621 |
| C77  | 2.126097339  | 5.747218073  | -4.837609144 |
| C78  | 1.236811836  | 6.023667736  | -3.604770576 |
| C79  | 2.223210016  | 4.255675534  | -5.205325693 |
| C80  | 0.920427842  | 3.505679633  | -5.496611258 |
| C81  | 0.161986654  | 3.893337510  | -6.776528258 |
| C82  | -1.010298228 | 6.054545959  | -7.210411578 |
| C83  | 1.035167478  | 6.167971336  | -1.180098902 |
| C84  | 0.973531509  | 7.663669610  | -0.813321409 |
| C85  | 1.537817596  | 5.394899758  | 0.047519543  |
| C86  | 2.246354422  | 9.743321825  | -0.641842198 |
| C87  | 1.819934691  | 10.995059675 | -1.403292332 |
| C88  | 0.778365656  | 11.946020273 | -3.421397829 |
| C89  | -0.580300316 | 12.605028489 | -3.098589503 |
| C90  | 0.857856612  | 11.565049801 | -4.915705108 |
| C91  | -0.166940943 | 10.497591385 | -5.286017666 |
| C92  | -2.744759276 | 12.374450734 | -1.963035495 |
| C93  | -2.723073165 | 13.661314017 | -1.146984489 |
| C94  | -3.518560864 | 11.275619616 | -1.186145428 |
| C95  | -3.687309663 | 10.017269142 | -2.003577727 |
| C96  | -4.730702654 | 9.904666121  | -2.935286869 |
| C97  | -2.764466570 | 8.963378290  | -1.907034051 |
| C98  | -4.841842079 | 8.783288015  | -3.760287907 |
| C99  | -2.847313566 | 7.844117248  | -2.739602920 |
| C100 | -3.885638508 | 7.771738674  | -3.665845847 |
| C101 | 5.393417609  | -6.389778541 | -6.669910549 |
| C102 | 3.942402193  | -5.952209736 | -6.551815542 |
| C103 | 2.442083396  | -4.065608748 | -5.949486994 |
| C104 | 2.171715959  | -2.906196349 | -6.914457175 |
| C105 | 2.725412540  | -0.578366336 | -7.442169355 |
| C106 | 3.949622646  | 0.324340467  | -7.549923575 |
| C107 | 6.175291919  | 0.963019684  | -6.774057767 |

|       |               |               |              |
|-------|---------------|---------------|--------------|
| C108  | 7.307342936   | 0.471755323   | -7.653806054 |
| C109  | -1.140386282  | -5.706587347  | -8.333969073 |
| C110  | -2.084982380  | -4.518603551  | -8.557130490 |
| C111  | -1.026155568  | -6.004670254  | -6.821503261 |
| C112  | -0.420753102  | -7.398140736  | -6.567519020 |
| C113  | -0.029101135  | -7.553952581  | -5.115384304 |
| C114  | -2.372790690  | -2.088262419  | -8.553273330 |
| C115  | -1.640549507  | -1.031799516  | -9.357883185 |
| C116  | -3.003030099  | -1.569665835  | -7.236030833 |
| C117  | -1.964041429  | -1.424991740  | -6.158392616 |
| C118  | -1.169944398  | -0.271077640  | -6.069443640 |
| C119  | -1.676249153  | -2.511894264  | -5.314525901 |
| C120  | -0.069471991  | -0.241123676  | -5.207800351 |
| C121  | -0.571670290  | -2.481675176  | -4.460359519 |
| C122  | 0.253837674   | -1.354575296  | -4.431953638 |
| C123  | 7.882322652   | -7.643770265  | -0.908370455 |
| C124  | 8.804115951   | -7.587602217  | 0.320161697  |
| C125  | 6.419070952   | -7.930755962  | -0.537301173 |
| C126  | 5.425944985   | -7.816949232  | -1.652263777 |
| C127  | 5.277116048   | -8.666893849  | -2.730506221 |
| C128  | 3.658001121   | -7.155294469  | -2.748157965 |
| C129  | 9.486351046   | -8.498490742  | 2.469654879  |
| C130  | 10.948922620  | -8.529736501  | 2.084778671  |
| C131  | -0.227173050  | -6.651232243  | 1.888325567  |
| C132  | 1.182553044   | -6.440130372  | 2.361158890  |
| C133  | 2.261906742   | -7.077745903  | 1.394817254  |
| C134  | 2.005444863   | -8.607697854  | 1.255949698  |
| C135  | 3.127449035   | -9.319805823  | 0.482394602  |
| C136  | 3.063731447   | -10.816976211 | 0.573231035  |
| C137  | 3.639059949   | -6.919065668  | 2.107081198  |
| C138  | 3.972331053   | -1.501530633  | -1.107793014 |
| Fe139 | 4.395494009   | -3.103250778  | -2.188802133 |
| Fe140 | 2.443904219   | -0.081271825  | -0.846539851 |
| Fe141 | 5.373679207   | -0.334483186  | -0.424708596 |
| Fe142 | 4.418671912   | -0.583331492  | -2.786914614 |
| Fe143 | 4.437633939   | 1.871874173   | -1.734891543 |
| Fe144 | 4.868228500   | -2.674878937  | 0.348757886  |
| Fe145 | 2.453021563   | -2.604900465  | -0.421641566 |
| H146  | -6.897907435  | -6.554925331  | 0.586636168  |
| H147  | -6.619705958  | -6.001801365  | -0.922259434 |
| H148  | -10.124606921 | -3.634799659  | -0.328908470 |
| H149  | -8.908953609  | -5.450550124  | -1.260601610 |
| H150  | -9.303924994  | -6.197037459  | 0.282381888  |
| H151  | -8.454079618  | -1.530355156  | 0.487680237  |
| H152  | -10.336584822 | -3.702996699  | 2.604690480  |
| H153  | -10.231720304 | -1.536636161  | 0.580511600  |
| H154  | -10.414508550 | -3.828160842  | 4.914831928  |
| H155  | -7.889111142  | -4.349586284  | 3.367145340  |
| H156  | -10.066221962 | -2.084858014  | 5.007960463  |
| H157  | -3.619817985  | -1.470979199  | 2.974065986  |
| H158  | -6.125514109  | -2.817055312  | 2.530533400  |
| H159  | -5.823083609  | -5.213893319  | 3.992319492  |
| H160  | -6.053025799  | 1.988986820   | 5.102530355  |
| H161  | -6.981771054  | -0.530359933  | 3.992112675  |
| H162  | -6.054658423  | -4.654755682  | 5.667947031  |
| H163  | -4.959427177  | -0.905600659  | 1.950215756  |
| H164  | -6.856943702  | -1.193088534  | 6.675242663  |
| H165  | -7.616085654  | 1.192547376   | 5.408002440  |
| H166  | -1.479401844  | -2.678287117  | 4.666003206  |
| H167  | -0.935256023  | -2.200110558  | 3.040853258  |
| H168  | 0.257790237   | -2.426324891  | 4.334346917  |

|      |              |              |               |
|------|--------------|--------------|---------------|
| H169 | -1.915593645 | -0.252093455 | 4.224242401   |
| H170 | -6.808342590 | -1.695289420 | 8.921988529   |
| H171 | -2.428203127 | 3.041209368  | 3.888472650   |
| H172 | -3.702905940 | 2.236643333  | 8.118533115   |
| H173 | -3.265354331 | 5.588568744  | 7.332327809   |
| H174 | -0.124307155 | 0.161817123  | 2.588756486   |
| H175 | 1.124818884  | -0.026851495 | 3.821895320   |
| H176 | 7.765163129  | 2.359673762  | 6.367139688   |
| H177 | -3.181798516 | 4.643428998  | 3.722355106   |
| H178 | -3.662900449 | 6.075402836  | 5.668008279   |
| H179 | -1.459895694 | 4.514317971  | 4.149453327   |
| H180 | -1.964821204 | 6.042993977  | 6.206217826   |
| H181 | -3.809082062 | 3.595389514  | 5.918319798   |
| H182 | -0.790739919 | 3.706222776  | 6.440126631   |
| H183 | -2.548116965 | 1.493668892  | 5.695174835   |
| H184 | -0.001823135 | 1.353607119  | 3.895913195   |
| H185 | 1.707677759  | 4.341976843  | -0.236093048  |
| H186 | 0.739225363  | 5.428574061  | 0.804424072   |
| H187 | 2.789142738  | 5.822249616  | 1.505739898   |
| H188 | 2.620343684  | 5.929093252  | 4.114868456   |
| H189 | 4.776822214  | 4.314388152  | 1.808339865   |
| H190 | 6.220695731  | 2.412039744  | 2.449711962   |
| H191 | 4.820738032  | 2.727502670  | 6.525639599   |
| H192 | -2.736590693 | -0.852961371 | 6.553070894   |
| H193 | -2.760196974 | -3.776088624 | 7.913734365   |
| H194 | -2.565978866 | -2.748678237 | 9.348919042   |
| H195 | -4.471619198 | -2.288044516 | 7.113862829   |
| H196 | -6.261354808 | -0.042885333 | 9.292867577   |
| H197 | 3.348346508  | 4.608450194  | 5.872215113   |
| H198 | 0.228305390  | -0.805255441 | 6.331816656   |
| H199 | -3.732317034 | 3.948379423  | 10.314485767  |
| H200 | -4.113138861 | 2.209806201  | 10.379794685  |
| H201 | -1.369150472 | 2.003500778  | 10.562459749  |
| H202 | 9.080980293  | -6.286646583 | 8.271297218   |
| H203 | -1.359971841 | -6.541988333 | -2.585216769  |
| H204 | -0.282344158 | -8.225653041 | 3.001588994   |
| H205 | -1.167622397 | -8.168696411 | -6.805894262  |
| H206 | 0.456056448  | -7.554513598 | -7.212829035  |
| H207 | -2.018201727 | -5.957733742 | -6.346549097  |
| H208 | -0.868508465 | -1.439134046 | -10.053650393 |
| H209 | -1.673358617 | -6.549690037 | -8.800146407  |
| H210 | -2.980562881 | -2.372521865 | -2.479021051  |
| H211 | -4.004628085 | -4.571349357 | -0.601890128  |
| H212 | -0.564302823 | -3.168255951 | -8.139340304  |
| H213 | -3.209716181 | -2.398902313 | -9.210960465  |
| H214 | 0.728316400  | -4.847060475 | -8.604315512  |
| H215 | -1.221415164 | -5.794187710 | -0.995539853  |
| H216 | -0.414447166 | -5.221704858 | -6.348248018  |
| H217 | 0.634023989  | -6.419578127 | -9.078084720  |
| H218 | -6.332292078 | -3.586972594 | -3.263824685  |
| H219 | -3.374693919 | -1.956592333 | -0.824704261  |
| H220 | 1.816736764  | -7.105642868 | -5.631070391  |
| H221 | -2.363460142 | -3.971407590 | -0.401747470  |
| H222 | -3.864557112 | 3.764323441  | 1.428902250   |
| H223 | -3.157806333 | 1.301766285  | 0.690724798   |
| H224 | -8.451036449 | 2.215535553  | 1.574755694   |
| H225 | -7.117270471 | 0.807767316  | -0.698700796  |
| H226 | -6.460885691 | 5.003137904  | -0.597504866  |
| H227 | -7.859599401 | 10.088671760 | -0.400575334  |
| H228 | -7.246527165 | 6.964607807  | 1.811610954   |
| H229 | -8.575178293 | 6.658438383  | -0.569718049  |

|      |              |              |              |
|------|--------------|--------------|--------------|
| H230 | -5.696344915 | 7.742180448  | -0.739085029 |
| H231 | -9.219387867 | 9.946942256  | -4.409385279 |
| H232 | -2.724811570 | 4.743790538  | -0.527718870 |
| H233 | -4.103797612 | 4.394520282  | -1.574771051 |
| H234 | -8.731031103 | 11.432291865 | -2.386555920 |
| H235 | -7.545377000 | 6.352003978  | -1.970098838 |
| H236 | -5.473578072 | 2.388164756  | -0.391559195 |
| H237 | -7.266259704 | 0.913554859  | 1.733059742  |
| H238 | -9.402232490 | 2.222912633  | -2.914908468 |
| H239 | -1.441761405 | 0.627536215  | -3.082521107 |
| H240 | -9.902733093 | 0.611874595  | -2.368460905 |
| H241 | 9.457699771  | 2.981785280  | 4.812430779  |
| H242 | 8.070940460  | 3.169886339  | 3.964572092  |
| H243 | 2.734085402  | 5.409503767  | -2.287681709 |
| H244 | -0.003692958 | 5.860873124  | -1.370305455 |
| H245 | 2.817247204  | 7.982825284  | -1.657284364 |
| H246 | -2.356368020 | 3.052234311  | -3.072119525 |
| H247 | -3.640173874 | 3.610756351  | -4.958435995 |
| H248 | -3.373160092 | 5.063222498  | -4.390160318 |
| H249 | -4.014882946 | 0.734003212  | -5.169213271 |
| H250 | -5.686931545 | 0.637958347  | -5.796941710 |
| H251 | 1.885530238  | 11.241415101 | -5.137493184 |
| H252 | 0.636003434  | 12.467749041 | -5.500466490 |
| H253 | 1.301151573  | 8.982355335  | -5.333376986 |
| H254 | -0.367059431 | 8.473880910  | -5.486494178 |
| H255 | -0.360762460 | 7.254455299  | -8.740251897 |
| H256 | -0.330490910 | 3.004959784  | -7.199559565 |
| H257 | -5.667185731 | 8.697335180  | -4.471312180 |
| H258 | -1.959588711 | 8.992963531  | -1.167455483 |
| H259 | -2.460061616 | 6.794200587  | -5.945457147 |
| H260 | 2.732484726  | 3.721213861  | -4.387706002 |
| H261 | 4.144547862  | 5.705656579  | -4.139448404 |
| H262 | 0.239450188  | 3.544083229  | -4.632312028 |
| H263 | -7.709857895 | -0.220189332 | -2.813185680 |
| H264 | 5.800633895  | 8.008012327  | -5.680573845 |
| H265 | -5.365525962 | -1.281152055 | -4.044557375 |
| H266 | 2.882829193  | 4.185138683  | -6.086749624 |
| H267 | -2.089258391 | 7.061391698  | -2.694093693 |
| H268 | -5.759777264 | 2.935206493  | -4.874561079 |
| H269 | 5.203157079  | 8.980265000  | -4.318686930 |
| H270 | 0.185364239  | 5.614926589  | -8.829418946 |
| H271 | -2.240971768 | 7.669677076  | -7.415278948 |
| H272 | -4.711494205 | -3.949097595 | -3.438520241 |
| H273 | -5.686414368 | -2.924727224 | -1.151230348 |
| H274 | -5.472935625 | 10.701314673 | -3.022146703 |
| H275 | -4.856508449 | 1.385435410  | -2.934821025 |
| H276 | 1.657737528  | 6.311251578  | -5.654765279 |
| H277 | 0.872592566  | 4.250565986  | -7.533378732 |
| H278 | 1.207223103  | 2.451115839  | -5.605305544 |
| H279 | -1.586136283 | 4.689175181  | -5.824818680 |
| H280 | 1.732852781  | 9.779673300  | 0.331221240  |
| H281 | 1.022116483  | 9.861596734  | -2.914975876 |
| H282 | 1.523621780  | 12.731837003 | -3.229877888 |
| H283 | 3.324413702  | 9.840925446  | -0.456164052 |
| H284 | -1.081314276 | 11.018965534 | -1.916270434 |
| H285 | 6.022536843  | -5.529037791 | -6.941184421 |
| H286 | 5.694426713  | -6.698145137 | -5.646630772 |
| H287 | 7.940106496  | -6.644516224 | -1.363284905 |
| H288 | 6.442793327  | -7.886707571 | -7.573243112 |
| H289 | 4.828536031  | -8.161931852 | -7.496217530 |
| H290 | 6.306651972  | 4.321426268  | -0.492104829 |

|      |              |               |              |
|------|--------------|---------------|--------------|
| H291 | 6.575077371  | 7.349772222   | -0.000082146 |
| H292 | 6.678110483  | 6.452489177   | -4.186408672 |
| H293 | 4.952584775  | 5.489409428   | -0.346994921 |
| H294 | 7.916555440  | 7.509721374   | -0.923304164 |
| H295 | 6.547868262  | 1.117544068   | -5.749614265 |
| H296 | 7.334576390  | 5.651529914   | -2.271981423 |
| H297 | 3.285328593  | -5.311346529  | 7.542916795  |
| H298 | 5.312550866  | -7.131975976  | 6.139005988  |
| H299 | 5.001535697  | -0.646792324  | -6.026373776 |
| H300 | 3.965446778  | 0.649577953   | 3.647946380  |
| H301 | 2.459178460  | -0.884205295  | -8.462455349 |
| H302 | -0.359516389 | -3.327120489  | -3.801540395 |
| H303 | 1.897037178  | 0.055426044   | -7.081993618 |
| H304 | 2.811565680  | -3.077217819  | 6.111087757  |
| H305 | 3.356039316  | -1.755679001  | -5.723459858 |
| H306 | 2.805859090  | -4.088038705  | 4.660712573  |
| H307 | 3.096331902  | -6.098357879  | 5.960732606  |
| H308 | 5.165178748  | -4.794910094  | 5.153275716  |
| H309 | 5.119493984  | -3.882142154  | 6.671533519  |
| H310 | -3.781427227 | -2.284480870  | -6.931073071 |
| H311 | 3.525081826  | -7.691952169  | 8.478730970  |
| H312 | 2.510049601  | -10.409654326 | 7.509526201  |
| H313 | 1.126274274  | -1.314889178  | -3.781280632 |
| H314 | 3.488546744  | -9.614644292  | 10.141757131 |
| H315 | 1.959589182  | -9.939177054  | 9.651428573  |
| H316 | 4.480240907  | -2.749606891  | 3.657142591  |
| H317 | 0.551316409  | 0.650931378   | -5.123412486 |
| H318 | -2.322224214 | -3.393238958  | -5.330693397 |
| H319 | 6.425999599  | -10.313182129 | 3.037487076  |
| H320 | 6.352879931  | -8.954756476  | -0.127969172 |
| H321 | 5.307868167  | -8.220794821  | 3.627573804  |
| H322 | 5.807552331  | -11.260076682 | 1.987596579  |
| H323 | 7.053836288  | -0.388218596  | -8.320144861 |
| H324 | 5.733453764  | -5.311548523  | 2.456894729  |
| H325 | 1.328838573  | -6.841053015  | 3.375078750  |
| H326 | 4.549503745  | -4.100881704  | -5.909504066 |
| H327 | 1.928087182  | -9.043052230  | 2.264735381  |
| H328 | 3.746955594  | -8.658209788  | -4.233020397 |
| H329 | 2.761122902  | -6.630158580  | -3.051873911 |
| H330 | 3.965104890  | -11.006531708 | 8.316858926  |
| H331 | 4.480118822  | -0.720854675  | 2.717261955  |
| H332 | 7.316830746  | -5.866270525  | 4.156395489  |
| H333 | 6.660367467  | -4.064437706  | 2.396652869  |
| H334 | 7.291097217  | -6.257181850  | 6.514533279  |
| H335 | 3.221870358  | -1.105403592  | 6.591837722  |
| H336 | 1.956688452  | -12.302089051 | 0.196901352  |
| H337 | 3.076678029  | -9.021943494  | -0.575360959 |
| H338 | 4.110587982  | -9.023729993  | 0.863862546  |
| H339 | 1.049474104  | -8.760302908  | 0.734546706  |
| H340 | 2.409730906  | -3.724372144  | -4.903537886 |
| H341 | -1.400797815 | 0.591086092   | -6.700681703 |
| H342 | -3.490195480 | -0.610041258  | -7.466959700 |
| H343 | 1.382831076  | -5.360757983  | 2.362044652  |
| H344 | 7.169474519  | -7.379314152  | 4.489621231  |
| H345 | 5.709688311  | -9.056873447  | 4.874302506  |
| H346 | 2.901253277  | 0.352461346   | 5.739017123  |
| H347 | 5.860758910  | -9.522002162  | -3.054322684 |
| H348 | 6.112728077  | -7.247605592  | 0.264637645  |
| H349 | 1.676064319  | -4.825658338  | -6.110627004 |
| H350 | 5.855280938  | 1.940891262   | -7.171290349 |
| H351 | 6.087107169  | 0.684332095   | 5.718714933  |

|       |              |              |              |
|-------|--------------|--------------|--------------|
| H352  | 6.722001195  | 0.631668785  | 4.055527719  |
| H353  | 9.345849251  | -8.345777675 | -2.162749795 |
| H354  | 8.476407417  | -9.537018760 | -1.457190190 |
| H355  | 9.282096251  | -9.412436649 | 3.049108123  |
| H356  | 7.825396495  | -9.152575908 | 1.307827245  |
| H357  | 11.164372474 | -9.000817562 | 1.096235358  |
| H358  | 9.292805186  | -7.636881363 | 3.128611901  |
| H359  | 9.228957856  | 0.015901701  | 4.993846351  |
| H360  | -1.791242471 | 13.828847277 | -0.556568549 |
| H361  | 7.885406955  | -5.585004551 | 9.390285211  |
| H362  | 7.911738689  | -3.542335897 | 7.526922317  |
| H363  | -3.274314565 | 12.588487871 | -2.905813720 |
| H364  | -2.984984057 | 11.056497645 | -0.248248769 |
| H365  | -4.496280980 | 11.698354098 | -0.914682120 |
| H366  | -4.762546821 | 6.691233307  | -5.027450225 |
| H367  | 2.307072965  | -1.151959195 | 0.443532037  |
| H368  | -0.031010988 | -1.121437004 | -0.128269305 |
| Mo369 | 3.723031382  | -5.011461907 | -0.281464714 |
| N370  | -7.323288605 | -6.462332192 | -0.339599906 |
| N371  | -9.392684146 | -3.424310289 | 0.345554123  |
| N372  | -9.832579639 | -2.979055293 | 3.110695561  |
| N373  | -7.563464340 | -4.120707104 | 4.305725949  |
| N374  | -5.463712223 | -2.470051488 | 3.226508771  |
| N375  | -6.222200337 | 0.011070803  | 4.411840454  |
| N376  | -6.328150309 | -0.542184575 | 7.261073030  |
| N377  | -4.018774991 | -2.098997157 | 8.013806188  |
| N378  | -1.762098106 | -1.062417363 | 6.758965149  |
| N379  | -1.759342823 | 1.874863778  | 6.221968283  |
| N380  | -3.031495261 | 2.750560356  | 8.694276342  |
| N381  | 2.829780917  | -9.485185692 | 9.370614970  |
| N382  | 4.102877762  | -7.861801347 | 7.648752060  |
| N383  | 4.078032975  | -2.442565405 | 4.550151452  |
| N384  | 3.125766599  | -0.637088688 | 5.697515182  |
| N385  | 3.953427085  | -0.362070640 | 3.539268658  |
| N386  | 7.114451690  | -6.056542393 | 7.523618498  |
| N387  | -5.392173543 | -3.185485380 | -3.276601777 |
| N388  | -1.699100560 | -5.866690701 | -1.895484293 |
| N389  | -5.500683551 | -0.548514723 | -3.330474874 |
| N390  | -7.894229762 | 0.774436659  | -2.919722156 |
| N391  | -7.794890590 | 1.426544220  | -0.232018789 |
| N392  | -5.554602613 | 3.081254625  | 0.351635590  |
| N393  | -2.388554879 | 2.399099237  | -2.277643785 |
| N394  | -2.222453322 | 0.524959971  | -1.083937417 |
| N395  | -6.009010144 | 5.757288823  | -0.086106776 |
| N396  | -8.570580117 | 8.331428539  | -3.138446068 |
| N397  | -8.604113227 | 10.423716133 | -2.400360867 |
| N398  | 8.675586586  | 2.467996203  | 4.400411019  |
| N399  | 7.270160053  | 6.816928832  | -0.533840019 |
| N400  | 5.994331262  | 7.104988241  | -3.812676246 |
| N401  | 3.478017628  | 6.278630417  | -4.679171830 |
| N402  | -0.874206681 | 4.908522955  | -6.552245292 |
| N403  | -0.261681992 | 6.349438541  | -8.292865389 |
| N404  | -1.861272709 | 7.003484845  | -6.747946468 |
| N405  | 1.814822400  | 5.887975262  | -2.380814984 |
| N406  | 1.994798307  | 8.451291604  | -1.263692815 |
| N407  | 1.117411174  | 10.814682754 | -2.560947867 |
| N408  | 0.302219355  | 9.223696995  | -5.314049059 |
| N409  | -1.391428501 | 11.927333757 | -2.251272402 |
| N410  | 5.529975218  | -7.439552139 | -7.684074217 |
| N411  | 3.746071299  | -4.666193357 | -6.205606222 |
| N412  | 2.841806121  | -1.772936374 | -6.627214622 |

|      |              |               |              |
|------|--------------|---------------|--------------|
| N413 | 5.026124677  | 0.075431463   | -6.759677425 |
| N414 | 0.120954957  | -5.535499207  | -9.066224058 |
| N415 | -1.547331392 | -3.275008035  | -8.412400737 |
| N416 | 8.394082882  | -8.614254043  | -1.896363258 |
| N417 | 4.402203344  | -6.872895627  | -1.683779608 |
| N418 | 4.157257562  | -8.232048858  | -3.406988145 |
| N419 | 8.618857305  | -8.512274282  | 1.303867427  |
| N420 | 0.445244243  | 1.805450653   | 0.203128221  |
| N421 | 1.180037438  | 1.055505008   | -0.218652132 |
| O422 | -7.371631073 | -4.039703064  | 1.198892067  |
| O423 | -8.594403198 | -1.070122887  | 2.950521418  |
| O424 | -7.954058476 | -2.856912561  | 6.175098766  |
| O425 | -4.399684286 | -2.824797818  | 5.205171058  |
| O426 | -4.019649143 | 0.575955117   | 4.389979639  |
| O427 | -5.497592362 | 1.570380018   | 7.518748727  |
| O428 | -4.253256316 | -1.282449203  | 10.147150979 |
| O429 | -0.375273476 | -2.490170050  | 7.910720657  |
| O430 | 0.374803924  | 1.566589413   | 6.973292836  |
| O431 | -1.275302910 | 4.183751679   | 8.820848975  |
| O432 | -2.043182362 | 3.132475507   | 12.124868031 |
| O433 | 4.904872440  | -9.617333437  | 6.373072179  |
| O434 | 5.568375380  | -6.015849802  | 9.226658085  |
| O435 | 9.812068149  | -3.789948600  | 8.222925115  |
| O436 | -5.626035919 | -0.344195543  | -1.044791469 |
| O437 | -3.276723595 | -5.107206971  | -3.346396514 |
| O438 | -7.016160407 | 2.767913142   | -3.615061699 |
| O439 | -4.973614955 | 2.547380148   | -5.343685691 |
| O440 | -9.834441643 | 2.485409079   | -0.355241011 |
| O441 | -6.386666268 | 3.467973750   | 2.443542249  |
| O442 | -4.343475193 | 6.294116938   | 1.379859601  |
| O443 | -6.709098156 | 8.889595850   | 1.396060379  |
| O444 | 8.796255810  | 0.091984079   | 6.988453669  |
| O445 | 3.183290017  | 5.628641677   | 3.377972647  |
| O446 | 4.883427736  | 7.848796195   | -1.969750975 |
| O447 | 3.060542842  | 8.347287094   | -5.593852381 |
| O448 | 0.053362451  | 6.371903216   | -3.763473983 |
| O449 | 0.046796889  | 8.092201540   | -0.110495088 |
| O450 | 2.736534946  | 5.998554054   | 0.544192579  |
| O451 | 2.095274599  | 12.113230697  | -0.948538367 |
| O452 | -0.879824534 | 13.703423743  | -3.587790382 |
| O453 | -1.361751239 | 10.782048719  | -5.469100783 |
| O454 | -3.662646376 | 14.439268942  | -1.105661301 |
| O455 | -3.927369919 | 6.661476951   | -4.521980447 |
| O456 | 3.011330645  | -6.777028520  | -6.739127570 |
| O457 | 1.408868312  | -3.031018344  | -7.898466214 |
| O458 | 3.905872142  | 1.276708579   | -8.348514854 |
| O459 | 8.419246718  | 0.976505615   | -7.656593579 |
| O460 | -3.285490151 | -4.694892833  | -8.828860639 |
| O461 | -0.825153277 | -7.822736882  | -4.220573757 |
| O462 | 1.268148257  | -7.338621590  | -4.818285689 |
| O463 | -1.880434462 | 0.166119374   | -9.310614508 |
| O464 | 9.755811131  | -6.785681434  | 0.376783367  |
| O465 | 11.850003126 | -8.148986644  | 2.818849226  |
| O466 | -0.833496528 | -5.937449938  | 1.102643606  |
| O467 | -0.876023872 | -7.758394851  | 2.382871695  |
| O468 | 3.941310388  | -11.547033888 | 1.030581786  |
| O469 | 1.904560062  | -11.329434845 | 0.081522511  |
| O470 | 4.525435922  | -6.243019399  | 1.456325078  |
| O471 | 3.840168777  | -7.483948035  | 3.210013959  |
| O472 | 2.244850536  | -6.448208049  | 0.171635234  |
| O473 | 7.656897456  | -6.561284935  | 4.775314748  |

|  |                          |              |               |              |
|--|--------------------------|--------------|---------------|--------------|
|  | O474                     | 6.361404337  | -4.771142132  | 3.002543923  |
|  | O475                     | -2.923942426 | 4.234681435   | -4.665852699 |
|  | O476                     | 6.645728444  | -11.093768795 | 2.466883802  |
|  | O477                     | 6.077453520  | -8.738053801  | 4.010145259  |
|  | S478                     | 4.697878745  | 4.120877093   | -2.322675491 |
|  | S479                     | 2.762328417  | 0.928371268   | -2.934711390 |
|  | S480                     | 2.405717803  | -4.168353881  | -2.057699185 |
|  | S481                     | 3.971931860  | 1.146274133   | 0.376447716  |
|  | S482                     | 0.568889571  | -1.689080901  | -1.208967886 |
|  | S483                     | 4.955761938  | -2.252941851  | -4.194923827 |
|  | S484                     | 3.095255767  | -3.515206032  | 1.491199034  |
|  | S485                     | 6.259975955  | 0.615893842   | -2.220471916 |
|  | S486                     | 5.894695273  | -4.224138464  | -0.892908685 |
|  | S487                     | 6.283640524  | -1.279475901  | 1.351667139  |
|  | <b>6-2u(a)</b>           |              |               |              |
|  | Fe( 139)                 | 0.553        | -2.354        |              |
|  | Fe( 140)                 | 0.357        | -1.308        |              |
|  | Fe( 141)                 | 0.532        | -2.538        |              |
|  | Fe( 142)                 | 0.579        | 2.851         |              |
|  | Fe( 143)                 | 0.569        | 2.970         |              |
|  | Fe( 144)                 | 0.515        | 2.373         |              |
|  | Fe( 145)                 | 0.414        | -1.572        |              |
|  | <b>S=1/2</b>             |              |               |              |
|  | bmlcnx2b262n2x351u.car_1 |              |               |              |
|  | C1                       | -8.160627614 | -4.400737028  | -1.526012751 |
|  | C2                       | -8.199703236 | -5.493143048  | -2.602527804 |
|  | C3                       | -9.253009799 | -2.378966267  | -0.646065144 |
|  | C4                       | -9.303360866 | -2.720788747  | 0.840701183  |
|  | C5                       | -9.984941651 | -4.290532373  | 2.577099065  |
|  | C6                       | -8.617699911 | -4.696558111  | 3.139694570  |
|  | C7                       | -6.381982042 | -5.557926596  | 2.633879291  |
|  | C8                       | -5.513300623 | -4.309119893  | 2.822776554  |
|  | C9                       | -4.897376011 | -2.089634606  | 2.028080251  |
|  | C10                      | -5.287395247 | -1.293049914  | 3.281561674  |
|  | C11                      | -7.050369768 | -0.552255862  | 4.780558496  |
|  | C12                      | -6.703783207 | -1.241039064  | 6.108079644  |
|  | C13                      | -6.820498420 | -3.298344265  | 7.431792510  |
|  | C14                      | -5.440189468 | -3.873559516  | 7.770792188  |
|  | C15                      | -3.374300369 | -4.893030026  | 6.910230914  |
|  | C16                      | -2.124695911 | -4.062850308  | 6.599690452  |
|  | C17                      | -1.269627876 | -1.969162480  | 5.573558472  |
|  | C18                      | -1.286872177 | -0.658713062  | 6.383110564  |
|  | C19                      | -1.286859112 | -1.769784957  | 4.033818301  |
|  | C20                      | -0.270945107 | -0.717635151  | 3.577909437  |
|  | C21                      | -1.051908862 | -3.106135034  | 3.319866654  |
|  | C22                      | -2.535280956 | 1.360541208   | 7.038426677  |
|  | C23                      | -2.901105840 | 1.094899696   | 8.511583158  |
|  | C24                      | -3.522245107 | 2.332639923   | 6.350115255  |
|  | C25                      | -3.739315806 | 3.592646266   | 7.197641497  |
|  | C26                      | -3.024079700 | 2.713606473   | 4.949802442  |
|  | C27                      | -4.394891741 | 0.055263937   | 10.114090509 |
|  | C28                      | -3.264942425 | -0.392224654  | 11.019886664 |
|  | C29                      | 3.002303420  | -11.855449794 | 5.459717644  |
|  | C30                      | 3.883760445  | -10.699613183 | 4.991585226  |
|  | C31                      | 4.426816980  | -8.307972057  | 5.453405187  |
|  | C32                      | 5.360017705  | -8.057747196  | 6.651893143  |
|  | C33                      | 3.428990953  | -7.151938032  | 5.256860886  |
|  | C34                      | 4.103304232  | -5.805367546  | 4.984890121  |
|  | C35                      | 3.085057038  | -4.761612435  | 4.527442171  |
|  | C36                      | 3.317817973  | -2.271617452  | 4.492206451  |
|  | C37                      | 7.639254726  | -7.489873389  | 7.342255057  |
|  | C38                      | 8.085130101  | -6.046380141  | 7.428962281  |
|  | C39                      | -4.755632139 | -1.984877155  | -3.097243990 |
|  | C40                      | -5.154219313 | -0.532848398  | -2.796705798 |
|  | C41                      | -3.303440590 | -2.211599494  | -2.636957118 |
|  | C42                      | -2.879933662 | -3.688053930  | -2.502088659 |
|  | C43                      | -2.298252072 | -4.323122491  | -3.760623467 |
|  | C44                      | -5.202499235 | 1.723392522   | -3.808139297 |
|  | C45                      | -6.603758278 | 2.288995340   | -3.553156109 |



|      |              |              |              |
|------|--------------|--------------|--------------|
| C46  | -4.576688035 | 2.376007976  | -5.058264726 |
| C47  | -8.879115492 | 1.776206911  | -2.802171414 |
| C48  | -8.882749047 | 1.834986475  | -1.265105049 |
| C49  | -7.681452260 | 1.313890972  | 0.813565050  |
| C50  | -6.654750525 | 2.275956136  | 1.416084650  |
| C51  | -4.641708539 | 3.648498713  | 1.118147112  |
| C52  | -5.205996778 | 4.989424703  | 1.605941071  |
| C53  | -3.602901175 | 3.988020794  | 0.032438610  |
| C54  | -2.959897428 | 2.793784388  | -0.589377267 |
| C55  | -2.858390515 | 1.471485972  | -0.202206360 |
| C56  | -1.801047520 | 1.609126592  | -2.066333207 |
| C57  | -6.712970066 | 6.827546856  | 0.979916773  |
| C58  | -7.218949022 | 7.029821699  | 2.404632355  |
| C59  | -7.867405672 | 7.002664026  | -0.036684819 |
| C60  | -8.263617424 | 8.413738023  | -0.364108087 |
| C61  | -8.369037961 | 9.530736967  | 0.442995420  |
| C62  | -8.896283143 | 10.036325201 | -1.648899707 |
| C63  | 7.330578720  | 0.360049804  | 6.494036733  |
| C64  | 8.110418569  | -0.937569569 | 6.595701823  |
| C65  | 6.016564782  | 0.032811696  | 5.738279504  |
| C66  | 5.106873174  | 1.229341360  | 5.591743877  |
| C67  | 4.159265092  | 1.550439323  | 6.581731619  |
| C68  | 5.181517558  | 2.058702647  | 4.458866777  |
| C69  | 3.311089210  | 2.655400301  | 6.446963360  |
| C70  | 4.349518494  | 3.170653236  | 4.314791673  |
| C71  | 3.408142482  | 3.462753770  | 5.306111301  |
| C72  | 6.435080265  | 6.461459952  | 0.735975313  |
| C73  | 5.645203732  | 7.616240297  | 0.108820090  |
| C74  | 5.538658280  | 5.221878703  | 0.872432790  |
| C75  | 5.328143011  | 9.026409813  | -1.878625057 |
| C76  | 3.946866091  | 8.668849150  | -2.432497590 |
| C77  | 2.323381693  | 6.864457889  | -2.897948989 |
| C78  | 1.314367305  | 6.785079873  | -1.731303413 |
| C79  | 2.513192214  | 5.523880106  | -3.632478065 |
| C80  | 1.270259697  | 4.862746012  | -4.237579082 |
| C81  | 0.622688886  | 5.566282893  | -5.441844863 |
| C82  | -0.580137072 | 7.754003917  | -5.402509470 |
| C83  | 0.883015857  | 6.271797565  | 0.613873428  |
| C84  | 0.712590752  | 7.617926737  | 1.345416185  |
| C85  | 1.304839705  | 5.214065849  | 1.644029961  |
| C86  | 1.871396402  | 9.593575104  | 2.201902114  |
| C87  | 1.465626013  | 10.997418615 | 1.763015575  |
| C88  | 0.583873783  | 12.441143353 | -0.024858923 |
| C89  | -0.821822589 | 12.971866878 | 0.332935519  |
| C90  | 0.818180274  | 12.474224114 | -1.551370799 |
| C91  | -0.124815747 | 11.531826327 | -2.292255721 |
| C92  | -3.076381545 | 12.404479817 | 1.130822271  |
| C93  | -3.194021798 | 13.424426156 | 2.256148624  |
| C94  | -3.864677611 | 11.118432586 | 1.503130513  |
| C95  | -3.898472649 | 10.124123235 | 0.364856828  |
| C96  | -4.851412381 | 10.253327915 | -0.656562610 |
| C97  | -2.947866408 | 9.095123712  | 0.260464663  |
| C98  | -4.846566197 | 9.401790949  | -1.763664569 |
| C99  | -2.913236206 | 8.248233216  | -0.851068727 |
| C100 | -3.862558476 | 8.416291085  | -1.856856408 |
| C101 | 6.263909627  | -4.281329266 | -7.542325874 |
| C102 | 4.790246087  | -3.914787516 | -7.460915285 |
| C103 | 3.154031361  | -2.288144260 | -6.539065343 |
| C104 | 2.938468082  | -0.909329239 | -7.168119138 |
| C105 | 3.422117829  | 1.482257950  | -6.970317915 |
| C106 | 4.609972093  | 2.410304306  | -6.730494871 |

|       |               |               |              |
|-------|---------------|---------------|--------------|
| C107  | 6.748055878   | 2.847566665   | -5.620794950 |
| C108  | 7.975501307   | 2.607948080   | -6.477099142 |
| C109  | -0.111829024  | -3.273522734  | -9.618011348 |
| C110  | -1.077758302  | -2.081506493  | -9.609713102 |
| C111  | -0.122613186  | -3.964986738  | -8.234602289 |
| C112  | 0.513785855   | -5.366095895  | -8.308195960 |
| C113  | 0.778457348   | -5.911618033  | -6.922417414 |
| C114  | -1.449037859  | 0.262256203   | -9.007308010 |
| C115  | -0.685980090  | 1.502314295   | -9.431772440 |
| C116  | -2.190041669  | 0.393853874   | -7.653727931 |
| C117  | -1.271592760  | 0.228038728   | -6.470228370 |
| C118  | -0.519832628  | 1.306976042   | -5.973671873 |
| C119  | -1.090192768  | -1.039988856  | -5.892016771 |
| C120  | 0.411764316   | 1.108178226   | -4.948593798 |
| C121  | -0.158748855  | -1.236204155  | -4.868334924 |
| C122  | 0.603679753   | -0.161918591  | -4.399438501 |
| C123  | 8.244360751   | -6.989938693  | -2.104671103 |
| C124  | 9.046295641   | -7.253195186  | -0.821183312 |
| C125  | 6.765246961   | -7.389476491  | -1.973979880 |
| C126  | 5.880093051   | -7.000861403  | -3.119409012 |
| C127  | 5.874175079   | -7.538820937  | -4.391595866 |
| C128  | 4.194126076   | -6.111603993  | -4.184425648 |
| C129  | 9.562999355   | -8.696629504  | 1.066763950  |
| C130  | 11.055988933  | -8.607716083  | 0.842568406  |
| C131  | -0.135398838  | -6.938543712  | 0.009374005  |
| C132  | 1.221182796   | -6.783520950  | 0.644741869  |
| C133  | 2.410016832   | -7.125920344  | -0.337139052 |
| C134  | 2.240309904   | -8.574111029  | -0.882651167 |
| C135  | 3.455176178   | -9.033655044  | -1.704865067 |
| C136  | 3.462605487   | -10.501282935 | -2.023141927 |
| C137  | 3.707928725   | -7.118649781  | 0.522024585  |
| C138  | 4.128639850   | -1.074281543  | -1.061039806 |
| Fe139 | 4.664914081   | -2.339455486  | -2.490791309 |
| Fe140 | 2.836434801   | 0.370736349   | -0.567364622 |
| Fe141 | 5.361586107   | -0.040958817  | 0.206669177  |
| Fe142 | 4.863732611   | 0.235318480   | -2.354342937 |
| Fe143 | 4.651667157   | 2.367256085   | -0.658614860 |
| Fe144 | 4.914294184   | -2.538866430  | 0.088707594  |
| Fe145 | 2.531972073   | -2.281182788  | -0.975892835 |
| H146  | -6.637738839  | -6.586107962  | -1.882306382 |
| H147  | -6.234850323  | -5.640626828  | -3.149467846 |
| H148  | -9.876310769  | -3.575609322  | -2.301882114 |
| H149  | -8.504987524  | -5.043490287  | -3.560689228 |
| H150  | -9.012812686  | -6.184812787  | -2.319288672 |
| H151  | -8.369470658  | -1.740201878  | -0.786361415 |
| H152  | -10.363464700 | -4.440462616  | 0.461457218  |
| H153  | -10.144739244 | -1.788721862  | -0.896007346 |
| H154  | -10.670791519 | -5.144136568  | 2.661703117  |
| H155  | -7.976319982  | -5.220219973  | 1.261515550  |
| H156  | -10.359925727 | -3.478349407  | 3.213557385  |
| H157  | -3.819170304  | -2.283433916  | 2.096540288  |
| H158  | -6.207003068  | -3.496248358  | 1.050826780  |
| H159  | -5.936154994  | -6.197885649  | 1.859813449  |
| H160  | -6.592758891  | 0.444474006   | 4.805184400  |
| H161  | -7.296240208  | -1.705654635  | 2.979659000  |
| H162  | -6.367007184  | -6.102063790  | 3.585799769  |
| H163  | -5.076560730  | -1.478766444  | 1.131263120  |
| H164  | -7.377595695  | -3.061081538  | 5.384144095  |
| H165  | -8.141197579  | -0.433941908  | 4.721256915  |
| H166  | -1.811715673  | -3.851871654  | 3.592439818  |
| H167  | -1.085601610  | -2.963145331  | 2.229414201  |

|      |              |              |               |
|------|--------------|--------------|---------------|
| H168 | -0.059334680 | -3.515842718 | 3.564976720   |
| H169 | -2.293245668 | -1.408055982 | 3.769275431   |
| H170 | -7.530804557 | -4.137540299 | 7.417523175   |
| H171 | -2.912169412 | 1.839017918  | 4.293097179   |
| H172 | -4.545136504 | -0.078628602 | 7.989903904   |
| H173 | -4.162673053 | 3.367099731  | 8.187426101   |
| H174 | -0.339439655 | -0.574228069 | 2.490626961   |
| H175 | 0.758182982  | -1.035344049 | 3.795424808   |
| H176 | 7.065360437  | 0.673473853  | 7.521912668   |
| H177 | -3.735711880 | 3.405108169  | 4.474717788   |
| H178 | -4.432153026 | 4.273129468  | 6.681188775   |
| H179 | -2.047879355 | 3.222659730  | 5.011981083   |
| H180 | -2.788072027 | 4.127191453  | 7.350882816   |
| H181 | -4.493594679 | 1.814347325  | 6.249037391   |
| H182 | -1.541586126 | 1.830686665  | 7.077664390   |
| H183 | -3.140554529 | -0.135182739 | 5.613627049   |
| H184 | -0.437892850 | 0.259820677  | 4.054971982   |
| H185 | 1.555353244  | 4.278818951  | 1.114583815   |
| H186 | 0.435695193  | 5.028972271  | 2.293712088   |
| H187 | 2.392333733  | 5.252001463  | 3.282293561   |
| H188 | 1.934446466  | 4.619702088  | 5.816652713   |
| H189 | 4.399048459  | 3.785170188  | 3.415090400   |
| H190 | 5.878063425  | 1.815202348  | 3.653287254   |
| H191 | 4.074109863  | 0.924272466  | 7.474061517   |
| H192 | -3.302307797 | -2.618542022 | 5.773559694   |
| H193 | -3.323559230 | -5.792591521 | 6.278363249   |
| H194 | -3.301369959 | -5.209809821 | 7.958558886   |
| H195 | -5.017166484 | -4.186408470 | 5.760780304   |
| H196 | -7.091232732 | -2.634453571 | 8.262962965   |
| H197 | 2.568334952  | 2.878694045  | 7.217534038   |
| H198 | -0.333502599 | -2.464633022 | 5.864192423   |
| H199 | -4.866996727 | 0.950488032  | 10.551917023  |
| H200 | -5.141733208 | -0.754804937 | 10.103951965  |
| H201 | -2.450413372 | -0.961525330 | 10.514770803  |
| H202 | 8.517637338  | -8.135053910 | 7.189038470   |
| H203 | -0.829087472 | -5.617323733 | -4.371553724  |
| H204 | -0.183661754 | -8.729076008 | 0.732210174   |
| H205 | -0.176532249 | -6.051361913 | -8.820790677  |
| H206 | 1.451811760  | -5.327084305 | -8.880478894  |
| H207 | -1.154169702 | -4.061875635 | -7.863129830  |
| H208 | 0.161223454  | 1.306258331  | -10.131011181 |
| H209 | -0.566614690 | -3.969056502 | -10.339508032 |
| H210 | -2.628072144 | -1.684797155 | -3.327059170  |
| H211 | -3.741464326 | -4.307501604 | -2.193339053  |
| H212 | 0.353774687  | -0.866285434 | -8.725501096  |
| H213 | -2.219071814 | 0.133213446  | -9.793219757  |
| H214 | 1.740678420  | -2.349220568 | -9.467434028  |
| H215 | -0.856237243 | -5.303690921 | -2.637425549  |
| H216 | 0.411830928  | -3.328456622 | -7.512655198  |
| H217 | 1.748639623  | -3.740237563 | -10.345918276 |
| H218 | -5.843178669 | -2.653569459 | -4.725063228  |
| H219 | -3.166601529 | -1.719340092 | -1.664977270  |
| H220 | 2.645773082  | -5.314211766 | -7.113703546  |
| H221 | -2.135577865 | -3.762546713 | -1.696822421  |
| H222 | -4.158147491 | 3.168789071  | 1.981695056   |
| H223 | -3.257533917 | 1.009743007  | 0.699121285   |
| H224 | -8.654638039 | 1.600044536  | 1.231941882   |
| H225 | -7.052251141 | 0.843609882  | -1.174151619  |
| H226 | -6.611952425 | 4.864126095  | 0.124593537   |
| H227 | -8.178601198 | 9.687075553  | 1.498729517   |
| H228 | -7.684925378 | 6.117429661  | 2.847450522   |

|      |              |              |              |
|------|--------------|--------------|--------------|
| H229 | -8.738776746 | 6.415952900  | 0.307925315  |
| H230 | -5.914497401 | 7.559875821  | 0.778487018  |
| H231 | -9.202023268 | 10.637630386 | -2.500627545 |
| H232 | -2.848293353 | 4.639136400  | 0.504610218  |
| H233 | -4.093864278 | 4.596517718  | -0.746732527 |
| H234 | -8.935250921 | 11.514443981 | -0.117866090 |
| H235 | -7.543994770 | 6.541701656  | -0.984464301 |
| H236 | -5.503779311 | 2.302808872  | -0.297112702 |
| H237 | -7.459094834 | 0.300808518  | 1.180487791  |
| H238 | -9.171550772 | 2.771307457  | -3.158888964 |
| H239 | -1.203196053 | 1.386243230  | -2.945232900 |
| H240 | -9.653015300 | 1.065314673  | -3.121836011 |
| H241 | 8.853575693  | 1.726864968  | 6.361367130  |
| H242 | 7.542554528  | 2.119617580  | 5.464786909  |
| H243 | 2.707798393  | 5.867132217  | -0.484238644 |
| H244 | -0.116528369 | 6.002420785  | 0.243483396  |
| H245 | 2.614962560  | 8.182184664  | 0.819915261  |
| H246 | -2.194983910 | 3.708192555  | -2.375472853 |
| H247 | -3.303262887 | 4.751212124  | -4.152403859 |
| H248 | -3.168085523 | 6.010644285  | -3.202328024 |
| H249 | -3.543046585 | 2.019958416  | -5.169033110 |
| H250 | -5.148469816 | 2.082316743  | -5.955757386 |
| H251 | 1.873095929  | 12.228143019 | -1.743600325 |
| H252 | 0.624196718  | 13.497752526 | -1.897419393 |
| H253 | 1.403518581  | 10.111012096 | -2.605287270 |
| H254 | -0.221253468 | 9.637073152  | -3.051802707 |
| H255 | 0.144027673  | 9.325273529  | -6.500020675 |
| H256 | 0.199118240  | 4.816904465  | -6.127269203 |
| H257 | -5.603909009 | 9.507162169  | -2.544367070 |
| H258 | -2.215413837 | 8.930673861  | 1.056072186  |
| H259 | -2.178355035 | 8.103085016  | -4.151942563 |
| H260 | 2.967988982  | 4.797957292  | -2.939799675 |
| H261 | 4.267060115  | 6.671463241  | -2.034016414 |
| H262 | 0.508120549  | 4.672542015  | -3.466377545 |
| H263 | -7.389735797 | 0.419244091  | -3.535167950 |
| H264 | 5.955328626  | 9.345511311  | -2.722415706 |
| H265 | -4.895198757 | -0.233336323 | -4.754151879 |
| H266 | 3.249890543  | 5.697801714  | -4.434579703 |
| H267 | -2.133509065 | 7.491587687  | -0.948941469 |
| H268 | -5.390704544 | 4.044947153  | -4.477922603 |
| H269 | 5.181631858  | 9.894397305  | -1.221230452 |
| H270 | 0.779146067  | 7.779910332  | -6.949832783 |
| H271 | -1.853332369 | 9.343883978  | -5.300279580 |
| H272 | -4.204714145 | -2.964340078 | -4.818442856 |
| H273 | -5.414189081 | -2.602000343 | -2.455400682 |
| H274 | -5.614676405 | 11.032068611 | -0.590975294 |
| H275 | -4.610363781 | 2.047521225  | -2.934206486 |
| H276 | 1.906636975  | 7.617615369  | -3.579453026 |
| H277 | 1.388774800  | 6.115707419  | -6.004928357 |
| H278 | 1.600594468  | 3.874239477  | -4.583156470 |
| H279 | -1.230118082 | 6.065400311  | -4.489089986 |
| H280 | 1.263944525  | 9.356761841  | 3.088373100  |
| H281 | 0.868344060  | 10.300730676 | -0.072281511 |
| H282 | 1.278341783  | 13.156122982 | 0.439887370  |
| H283 | 2.921422142  | 9.653159396  | 2.519378652  |
| H284 | -1.374584926 | 11.110835198 | 0.959636122  |
| H285 | 6.881168710  | -3.372545602 | -7.493712703 |
| H286 | 6.477050179  | -4.864304402 | -6.621742975 |
| H287 | 8.300829150  | -5.904116436 | -2.267179587 |
| H288 | 7.452089617  | -5.461176715 | -8.704568141 |
| H289 | 5.849413371  | -5.751127549 | -8.885030910 |

|      |              |               |              |
|------|--------------|---------------|--------------|
| H290 | 6.146545954  | 4.402836242   | 1.278825246  |
| H291 | 6.208062085  | 7.198055502   | 2.625795046  |
| H292 | 6.726372876  | 7.428776093   | -1.628956653 |
| H293 | 4.710787690  | 5.439653558   | 1.562681741  |
| H294 | 7.647349687  | 7.584302201   | 1.952098266  |
| H295 | 7.015714139  | 2.720238326   | -4.560561007 |
| H296 | 7.285851217  | 6.206873342   | 0.084055398  |
| H297 | 2.778455593  | -7.087743487  | 6.145605679  |
| H298 | 5.017016881  | -8.430977785  | 4.537675293  |
| H299 | 5.581148607  | 1.077975414   | -5.455040405 |
| H300 | 3.573180456  | -0.286439228  | 4.108571034  |
| H301 | 3.238644293  | 1.464376778   | -8.053081018 |
| H302 | -0.030434332 | -2.219473385  | -4.410529545 |
| H303 | 2.544855373  | 1.969739908   | -6.512107629 |
| H304 | 2.344982310  | -4.566204122  | 5.313908496  |
| H305 | 3.948554140  | -0.112888609  | -5.585981350 |
| H306 | 2.527477063  | -5.140832655  | 3.654809692  |
| H307 | 2.791910645  | -7.428048054  | 4.400704038  |
| H308 | 4.859637524  | -5.916579275  | 4.193748489  |
| H309 | 4.622212296  | -5.438716941  | 5.884864094  |
| H310 | -2.976538594 | -0.374761614  | -7.633315121 |
| H311 | 3.057067526  | -9.628762037  | 6.464484013  |
| H312 | 2.236501906  | -11.993149182 | 4.681348901  |
| H313 | 1.314746807  | -0.307744018  | -3.583865594 |
| H314 | 2.929750144  | -11.933757660 | 7.516751183  |
| H315 | 1.467044129  | -12.126371640 | 6.804168542  |
| H316 | 4.263335745  | -3.544034422  | 3.260069507  |
| H317 | 0.991665191  | 1.942309222   | -4.550021171 |
| H318 | -1.693124677 | -1.883084796  | -6.239780165 |
| H319 | 6.545943466  | -10.642145439 | 0.825738870  |
| H320 | 6.704005386  | -8.486516872  | -1.856945297 |
| H321 | 5.299190391  | -8.787400237  | 1.817054266  |
| H322 | 6.075559843  | -11.264780044 | -0.505221431 |
| H323 | 7.816177842  | 1.947255383   | -7.363339901 |
| H324 | 5.688221064  | -5.666216424  | 1.512649118  |
| H325 | 1.306885421  | -7.410692906  | 1.544963587  |
| H326 | 5.247781739  | -2.297848383  | -6.279162290 |
| H327 | 2.100677947  | -9.256936305  | -0.029364972 |
| H328 | 4.497048526  | -7.167914866  | -5.991274847 |
| H329 | 3.308324398  | -5.544809299  | -4.438346164 |
| H330 | 3.637806704  | -12.757505372 | 5.440210635  |
| H331 | 4.238875812  | -1.340451319  | 2.896756586  |
| H332 | 7.136422796  | -6.650713329  | 3.158435663  |
| H333 | 6.558689407  | -4.444751465  | 1.916410449  |
| H334 | 6.909983906  | -7.645707342  | 5.321646135  |
| H335 | 2.613949375  | -2.792303181  | 6.353614134  |
| H336 | 2.460885134  | -11.868689740 | -2.859218851 |
| H337 | 3.477294696  | -8.468373617  | -2.648475930 |
| H338 | 4.389586576  | -8.831130465  | -1.170858132 |
| H339 | 1.339274059  | -8.613588291  | -1.511911762 |
| H340 | 2.988827814  | -2.255207716  | -5.450809698 |
| H341 | -0.663168609 | 2.301229331   | -6.405924373 |
| H342 | -2.680274367 | 1.379285346   | -7.649357574 |
| H343 | 1.348081682  | -5.728170492  | 0.921310753  |
| H344 | 7.026049732  | -8.198271979  | 3.066171347  |
| H345 | 5.579319420  | -9.924376496  | 2.838759183  |
| H346 | 2.294103477  | -1.164445702  | 5.892688129  |
| H347 | 6.521364241  | -8.271631505  | -4.861862496 |
| H348 | 6.357041341  | -6.945552046  | -1.056931875 |
| H349 | 2.443949094  | -2.981626245  | -6.993303386 |
| H350 | 6.437561720  | 3.895169419   | -5.768572544 |

|       |              |               |              |
|-------|--------------|---------------|--------------|
| H351  | 5.505968443  | -0.763698870  | 6.300615912  |
| H352  | 6.274236747  | -0.368842290  | 4.745167544  |
| H353  | 9.842514203  | -7.293568930  | -3.353389397 |
| H354  | 8.973157663  | -8.652001919  | -3.078856666 |
| H355  | 9.344666896  | -9.737530974  | 1.355408812  |
| H356  | 8.054081117  | -9.047162194  | -0.395214088 |
| H357  | 11.385969688 | -8.798218790  | -0.206313279 |
| H358  | 9.269382700  | -8.050398005  | 1.910105061  |
| H359  | 8.673462077  | -1.204233738  | 5.668558981  |
| H360  | -2.317870413 | 13.470301610  | 2.945587912  |
| H361  | 7.189649200  | -7.748998026  | 8.317235660  |
| H362  | 7.335586118  | -5.293863533  | 7.080466821  |
| H363  | -3.528426916 | 12.853362568  | 0.231045413  |
| H364  | -3.411576404 | 10.664660121  | 2.398689069  |
| H365  | -4.885151281 | 11.427756024  | 1.772604538  |
| H366  | -4.560000891 | 7.735739887   | -3.543767620 |
| H367  | 2.052459794  | -1.031517187  | -0.029713115 |
| H368  | -0.136778273 | -1.243008703  | -0.551812890 |
| Mo369 | 3.903702604  | -4.667568879  | -1.264724054 |
| N370  | -6.973048357 | -6.250436209  | -2.789068259 |
| N371  | -9.210180047 | -3.531798367  | -1.534461846 |
| N372  | -9.941357262 | -3.866270451  | 1.187253935  |
| N373  | -7.753698372 | -5.256913958  | 2.256081880  |
| N374  | -5.639718367 | -3.335785789  | 1.885114228  |
| N375  | -6.605865379 | -1.277546424  | 3.601362267  |
| N376  | -6.945836946 | -2.576286297  | 6.175165573  |
| N377  | -4.655040599 | -4.234906812  | 6.718137945  |
| N378  | -2.342162578 | -2.857735057  | 6.012630140  |
| N379  | -2.407564734 | 0.112709984   | 6.281548869  |
| N380  | -3.952241992 | 0.268079585   | 8.747182786  |
| N381  | 2.342873571  | -11.604868418 | 6.746830222  |
| N382  | 3.707221976  | -9.554029782  | 5.674671912  |
| N383  | 3.725671151  | -3.499838126  | 4.131362230  |
| N384  | 2.585784550  | -2.096822182  | 5.615913841  |
| N385  | 3.598176537  | -1.222352610  | 3.710220341  |
| N386  | 6.632274994  | -7.720434802  | 6.324830814  |
| N387  | -4.916062195 | -2.267135619  | -4.531824867 |
| N388  | -1.260266236 | -5.160883000  | -3.564297333 |
| N389  | -5.134843933 | 0.277941685   | -3.889569432 |
| N390  | -7.609061167 | 1.402173704   | -3.393885605 |
| N391  | -7.798316577 | 1.303978139   | -0.634425690 |
| N392  | -5.696127762 | 2.784672107   | 0.581299815  |
| N393  | -2.276833902 | 2.865405681   | -1.791994819 |
| N394  | -2.142675975 | 0.743758350   | -1.123848246 |
| N395  | -6.216044031 | 5.471373486   | 0.838991519  |
| N396  | -8.595203965 | 8.744074029   | -1.669842215 |
| N397  | -8.771526626 | 10.550475587  | -0.393133409 |
| N398  | 8.133523953  | 1.333620266   | 5.750330952  |
| N399  | 6.974058575  | 6.819422939   | 2.058569045  |
| N400  | 6.010946963  | 7.974000763   | -1.155077526 |
| N401  | 3.629617182  | 7.357639165   | -2.467795146 |
| N402  | -0.463176019 | 6.476550322   | -5.059192960 |
| N403  | 0.253435733  | 8.339010893   | -6.287116701 |
| N404  | -1.505402285 | 8.535513542   | -4.789960099 |
| N405  | 1.784175791  | 6.337883735   | -0.533665185 |
| N406  | 1.738353367  | 8.514272226   | 1.233817939  |
| N407  | 0.887957374  | 11.124799113  | 0.530723548  |
| N408  | 0.398212716  | 10.322491507  | -2.620050392 |
| N409  | -1.683746549 | 12.075340711  | 0.871162343  |
| N410  | 6.541998250  | -5.002946540  | -8.787952294 |
| N411  | 4.503262496  | -2.777697537  | -6.799307763 |

|      |              |               |               |
|------|--------------|---------------|---------------|
| N412 | 3.530232619  | 0.108969040   | -6.510923827  |
| N413 | 5.636295926  | 1.974908606   | -5.954733942  |
| N414 | 1.204080325  | -2.897225289  | -10.151602496 |
| N415 | -0.594485334 | -0.908431028  | -9.114241908  |
| N416 | 8.886070135  | -7.647039716  | -3.260384587  |
| N417 | 4.820772328  | -6.101121352  | -3.010845119  |
| N418 | 4.805401966  | -6.964177155  | -5.044685981  |
| N419 | 8.808275364  | -8.409486449  | -0.141631507  |
| N420 | 0.398259645  | 1.704048588   | 0.430769573   |
| N421 | 1.287919103  | 1.181822812   | -0.031895598  |
| O422 | -7.265862918 | -4.340278115  | -0.663309965  |
| O423 | -8.789361671 | -1.965207374  | 1.680577274   |
| O424 | -8.352313605 | -4.536719890  | 4.342748659   |
| O425 | -4.749216145 | -4.191905426  | 3.794740457   |
| O426 | -4.437019236 | -0.686990585  | 3.953423717   |
| O427 | -6.268520598 | -0.586792089  | 7.071232285   |
| O428 | -5.117661664 | -4.026053085  | 8.957451829   |
| O429 | -1.004950985 | -4.523411863  | 6.867394270   |
| O430 | -0.323916674 | -0.341967405  | 7.098960294   |
| O431 | -2.268496669 | 1.617510920   | 9.444388186   |
| O432 | -3.269788261 | -0.217534778  | 12.230268147  |
| O433 | 4.666827241  | -10.870618246 | 4.032641054   |
| O434 | 4.941589477  | -8.168815543  | 7.818057780   |
| O435 | 9.172980272  | -5.705581077  | 7.866480696   |
| O436 | -5.480055947 | -0.142714426  | -1.656485997  |
| O437 | -2.762676824 | -4.105392022  | -4.903841318  |
| O438 | -6.762278086 | 3.524074445   | -3.448786081  |
| O439 | -4.543803466 | 3.806285711   | -4.940195337  |
| O440 | -9.853962822 | 2.336093004   | -0.681964345  |
| O441 | -6.724545382 | 2.581022878   | 2.610766430   |
| O442 | -4.702226539 | 5.620189257   | 2.541154554   |
| O443 | -7.176345473 | 8.084666183   | 3.015411061   |
| O444 | 8.122726946  | -1.663459782  | 7.579730090   |
| O445 | 2.590514487  | 4.556611578   | 5.098199487   |
| O446 | 4.735905561  | 8.206932846   | 0.720239086   |
| O447 | 3.207802723  | 9.585908430   | -2.848453837  |
| O448 | 0.136778304  | 7.143179528   | -1.905308149  |
| O449 | -0.297886404 | 7.826846622   | 2.030378754   |
| O450 | 2.416614993  | 5.691856954   | 2.408214820   |
| O451 | 1.642518252  | 11.956204188  | 2.526336734   |
| O452 | -1.115868129 | 14.161073248  | 0.145661210   |
| O453 | -1.310207696 | 11.835143510  | -2.501471794  |
| O454 | -4.185803961 | 14.115972580  | 2.426727723   |
| O455 | -3.780726228 | 7.576117434   | -2.977175503  |
| O456 | 3.919880537  | -4.673268221  | -7.961381787  |
| O457 | 2.283607296  | -0.763646329  | -8.224369390  |
| O458 | 4.579504389  | 3.542691723   | -7.242437135  |
| O459 | 9.065760090  | 3.101238284   | -6.234656796  |
| O460 | -2.247417465 | -2.199370143  | -10.015651739 |
| O461 | -0.084502852 | -6.423472965  | -6.216502354  |
| O462 | 2.034905174  | -5.769735691  | -6.453472556  |
| O463 | -0.977020244 | 2.641322300   | -9.096221901  |
| O464 | 9.954123292  | -6.481242974  | -0.458288301  |
| O465 | 11.863233984 | -8.429770006  | 1.744361415   |
| O466 | -0.717758483 | -6.093955007  | -0.651269062  |
| O467 | -0.754701562 | -8.154998296  | 0.187033840   |
| O468 | 4.357472246  | -11.291554694 | -1.726713884  |
| O469 | 2.357101530  | -10.905926541 | -2.701979196  |
| O470 | 4.608241811  | -6.264774655  | 0.160021694   |
| O471 | 3.850419356  | -7.937109327  | 1.460439304   |
| O472 | 2.467912450  | -6.199799737  | -1.359423636  |

|  |                          |              |               |              |
|--|--------------------------|--------------|---------------|--------------|
|  | O473                     | 7.446838641  | -7.477474619  | 3.605519436  |
|  | O474                     | 6.230542441  | -5.300223386  | 2.258044728  |
|  | O475                     | -2.650052730 | 5.294020071   | -3.633307800 |
|  | O476                     | 6.851719975  | -11.232678672 | 0.091436853  |
|  | O477                     | 6.031377922  | -9.390564611  | 2.134445124  |
|  | S478                     | 4.799310539  | 4.680355172   | -0.737371747 |
|  | S479                     | 3.187230107  | 1.793747225   | -2.348456885 |
|  | S480                     | 2.763724424  | -3.433952857  | -2.921827351 |
|  | S481                     | 3.916801317  | 1.363464553   | 1.187335535  |
|  | S482                     | 0.311406976  | -2.276930735  | -1.311744091 |
|  | S483                     | 5.485055904  | -1.015768291  | -4.111334707 |
|  | S484                     | 3.062361260  | -3.634666286  | 0.726375163  |
|  | S485                     | 6.584489425  | 1.213169960   | -1.167933546 |
|  | S486                     | 6.093476142  | -3.711870235  | -1.390738619 |
|  | S487                     | 6.128177228  | -1.571352239  | 1.651014352  |
|  | <b>6-2u(b)</b>           |              |               |              |
|  | Fe( 139)                 | 0.557        | -2.461        |              |
|  | Fe( 140)                 | 0.355        | -1.231        |              |
|  | Fe( 141)                 | 0.523        | -2.431        |              |
|  | Fe( 142)                 | 0.583        | 2.936         |              |
|  | Fe( 143)                 | 0.564        | 2.929         |              |
|  | Fe( 144)                 | 0.508        | 2.220         |              |
|  | Fe( 145)                 | 0.388        | 0.357         |              |
|  | <b>S=3/2</b>             |              |               |              |
|  | bmlcnx2b262n2x353u.car_1 |              |               |              |
|  | C1                       | -8.155099467 | -4.400680501  | -1.521702276 |
|  | C2                       | -8.195960817 | -5.493025215  | -2.597238589 |
|  | C3                       | -9.242574914 | -2.373149599  | -0.646989765 |
|  | C4                       | -9.296986742 | -2.717458735  | 0.839245429  |
|  | C5                       | -9.985109651 | -4.288372834  | 2.572315688  |
|  | C6                       | -8.619620623 | -4.697076367  | 3.138305899  |
|  | C7                       | -6.383587140 | -5.560550079  | 2.638562213  |
|  | C8                       | -5.514769563 | -4.312084557  | 2.827495657  |
|  | C9                       | -4.897495292 | -2.092525338  | 2.034320177  |
|  | C10                      | -5.288674361 | -1.295764588  | 3.287399072  |
|  | C11                      | -7.054209763 | -0.552390855  | 4.782656317  |
|  | C12                      | -6.709698902 | -1.241859615  | 6.110232710  |
|  | C13                      | -6.823684337 | -3.301341427  | 7.430472815  |
|  | C14                      | -5.440120129 | -3.868734563  | 7.771259538  |
|  | C15                      | -3.373366143 | -4.888498756  | 6.912259900  |
|  | C16                      | -2.124879075 | -4.059085741  | 6.599032013  |
|  | C17                      | -1.267529304 | -1.970020383  | 5.567373444  |
|  | C18                      | -1.287690720 | -0.661910511  | 6.379553903  |
|  | C19                      | -1.283207116 | -1.768258738  | 4.029858382  |
|  | C20                      | -0.264605424 | -0.717896803  | 3.572520259  |
|  | C21                      | -1.048896586 | -3.103458827  | 3.311865897  |
|  | C22                      | -2.536662546 | 1.358717765   | 7.029339653  |
|  | C23                      | -2.902243823 | 1.090856067   | 8.503632581  |
|  | C24                      | -3.526343494 | 2.330056670   | 6.342980037  |
|  | C25                      | -3.746870777 | 3.587076914   | 7.194550530  |
|  | C26                      | -3.028178570 | 2.715759278   | 4.944889509  |
|  | C27                      | -4.397454882 | 0.051670839   | 10.105252527 |
|  | C28                      | -3.269287406 | -0.395882304  | 11.010941129 |
|  | C29                      | 3.003353078  | -11.852801529 | 5.458423659  |
|  | C30                      | 3.889671900  | -10.699763274 | 4.992513153  |
|  | C31                      | 4.432359304  | -8.304659805  | 5.451222158  |
|  | C32                      | 5.365213184  | -8.053979759  | 6.651121696  |
|  | C33                      | 3.432744532  | -7.149399568  | 5.252176278  |
|  | C34                      | 4.102878930  | -5.799536773  | 4.985592978  |
|  | C35                      | 3.083069290  | -4.758789665  | 4.524060201  |
|  | C36                      | 3.315072728  | -2.267232967  | 4.495543193  |
|  | C37                      | 7.644825663  | -7.484761148  | 7.342196050  |
|  | C38                      | 8.091948647  | -6.041874040  | 7.428956236  |
|  | C39                      | -4.749590259 | -1.991038490  | -3.099345522 |
|  | C40                      | -5.151968907 | -0.540560588  | -2.796734295 |
|  | C41                      | -3.297633479 | -2.219309240  | -2.638939953 |
|  | C42                      | -2.878173495 | -3.697005706  | -2.505133552 |
|  | C43                      | -2.295199826 | -4.330459930  | -3.763343405 |
|  | C44                      | -5.198183235 | 1.717696770   | -3.806063412 |



|      |              |              |              |
|------|--------------|--------------|--------------|
| C45  | -6.600004711 | 2.284740143  | -3.550991177 |
| C46  | -4.572714866 | 2.372447978  | -5.055124041 |
| C47  | -8.877752837 | 1.776440227  | -2.801997032 |
| C48  | -8.881778359 | 1.836527355  | -1.266370069 |
| C49  | -7.686179623 | 1.318095662  | 0.814179912  |
| C50  | -6.662633134 | 2.282875420  | 1.418534179  |
| C51  | -4.642392187 | 3.647160820  | 1.124693696  |
| C52  | -5.201615056 | 4.992621427  | 1.608547463  |
| C53  | -3.596255919 | 3.979943232  | 0.045192171  |
| C54  | -2.964880741 | 2.781347801  | -0.577178706 |
| C55  | -2.871784724 | 1.457692506  | -0.193708299 |
| C56  | -1.823591356 | 1.590474666  | -2.063247670 |
| C57  | -6.702636774 | 6.835361121  | 0.976153735  |
| C58  | -7.205111425 | 7.034331795  | 2.406021813  |
| C59  | -7.859977858 | 7.014322830  | -0.034271778 |
| C60  | -8.256877193 | 8.423968498  | -0.358156786 |
| C61  | -8.357686183 | 9.542127533  | 0.447027662  |
| C62  | -8.904316288 | 10.042453462 | -1.642018670 |
| C63  | 7.337941641  | 0.358291577  | 6.490668741  |
| C64  | 8.119866976  | -0.937895014 | 6.588864767  |
| C65  | 6.026576057  | 0.030777190  | 5.731882782  |
| C66  | 5.113549433  | 1.226405392  | 5.587570774  |
| C67  | 4.164888131  | 1.543411112  | 6.578160992  |
| C68  | 5.186828928  | 2.058872660  | 4.456483379  |
| C69  | 3.313392239  | 2.645768097  | 6.444710236  |
| C70  | 4.351809024  | 3.168807517  | 4.314786313  |
| C71  | 3.408772021  | 3.455400476  | 5.305760484  |
| C72  | 6.436917061  | 6.464725635  | 0.740411748  |
| C73  | 5.644761776  | 7.617108724  | 0.110069444  |
| C74  | 5.542461106  | 5.223524931  | 0.872156494  |
| C75  | 5.322099976  | 9.026140383  | -1.878141934 |
| C76  | 3.942671255  | 8.666642191  | -2.434797406 |
| C77  | 2.321756871  | 6.860550227  | -2.898973660 |
| C78  | 1.315002626  | 6.784248821  | -1.730432388 |
| C79  | 2.511136090  | 5.519360717  | -3.631154934 |
| C80  | 1.266785535  | 4.858857748  | -4.233804256 |
| C81  | 0.616723793  | 5.563061949  | -5.437025003 |
| C82  | -0.582441084 | 7.753083636  | -5.397308989 |
| C83  | 0.881623362  | 6.269012307  | 0.612791627  |
| C84  | 0.712951512  | 7.616078336  | 1.343095042  |
| C85  | 1.298953401  | 5.210957061  | 1.644397918  |
| C86  | 1.871565912  | 9.591693607  | 2.199918567  |
| C87  | 1.459616378  | 10.995599571 | 1.766440081  |
| C88  | 0.584191187  | 12.443185458 | -0.022142917 |
| C89  | -0.822698399 | 12.971952487 | 0.334516859  |
| C90  | 0.818858499  | 12.476404580 | -1.548313908 |
| C91  | -0.124729011 | 11.534034286 | -2.287883782 |
| C92  | -3.076101359 | 12.402303391 | 1.130373491  |
| C93  | -3.190573028 | 13.423788502 | 2.253715011  |
| C94  | -3.863749623 | 11.116773095 | 1.503536098  |
| C95  | -3.899977958 | 10.124028757 | 0.364161556  |
| C96  | -4.852519555 | 10.254921473 | -0.657308922 |
| C97  | -2.949112043 | 9.095149222  | 0.258410467  |
| C98  | -4.848346083 | 9.404166972  | -1.764823513 |
| C99  | -2.915246113 | 8.249165157  | -0.854097155 |
| C100 | -3.865102987 | 8.418358751  | -1.859357622 |
| C101 | 6.263907835  | -4.286263616 | -7.544302273 |
| C102 | 4.791486990  | -3.916719267 | -7.462059101 |
| C103 | 3.158924325  | -2.290327264 | -6.530980668 |
| C104 | 2.940581957  | -0.911502430 | -7.163155134 |
| C105 | 3.417937502  | 1.484746258  | -6.960917813 |

|       |               |               |              |
|-------|---------------|---------------|--------------|
| C106  | 4.610598536   | 2.407733746   | -6.729752254 |
| C107  | 6.753170577   | 2.844811187   | -5.627450542 |
| C108  | 7.979261067   | 2.602657794   | -6.485968970 |
| C109  | -0.107992342  | -3.272924282  | -9.620178018 |
| C110  | -1.072939833  | -2.079903333  | -9.614125639 |
| C111  | -0.124608172  | -3.966105428  | -8.237830813 |
| C112  | 0.509626955   | -5.368040996  | -8.311914759 |
| C113  | 0.776884053   | -5.912076287  | -6.926034593 |
| C114  | -1.442773371  | 0.264343980   | -9.010778403 |
| C115  | -0.677146158  | 1.501023806   | -9.438964196 |
| C116  | -2.182059315  | 0.397391031   | -7.656257136 |
| C117  | -1.268537957  | 0.225975112   | -6.468677540 |
| C118  | -0.513649592  | 1.301603517   | -5.968470864 |
| C119  | -1.099345409  | -1.041464455  | -5.885374129 |
| C120  | 0.406833762   | 1.099941200   | -4.933360683 |
| C121  | -0.180394824  | -1.240197290  | -4.850165508 |
| C122  | 0.584180440   | -0.169536436  | -4.377297724 |
| C123  | 8.242623967   | -6.986692889  | -2.102477690 |
| C124  | 9.046844219   | -7.249369062  | -0.819320851 |
| C125  | 6.762385116   | -7.382705813  | -1.969885076 |
| C126  | 5.878833081   | -6.996568964  | -3.117011348 |
| C127  | 5.872159238   | -7.533931168  | -4.389075106 |
| C128  | 4.189938282   | -6.109209859  | -4.180456645 |
| C129  | 9.564255337   | -8.698172701  | 1.065195484  |
| C130  | 11.058132190  | -8.605431729  | 0.844533790  |
| C131  | -0.142627276  | -6.957242318  | 0.012206907  |
| C132  | 1.209389262   | -6.780799883  | 0.646619620  |
| C133  | 2.402743489   | -7.120523573  | -0.334758984 |
| C134  | 2.238197786   | -8.569612623  | -0.878483579 |
| C135  | 3.452263047   | -9.030474353  | -1.700051477 |
| C136  | 3.456930053   | -10.497453309 | -2.021570185 |
| C137  | 3.697644343   | -7.102605725  | 0.533051961  |
| C138  | 4.134173131   | -1.073212528  | -1.064168400 |
| Fe139 | 4.695836517   | -2.313831385  | -2.529509042 |
| Fe140 | 2.853737593   | 0.395627572   | -0.547401521 |
| Fe141 | 5.342587706   | -0.042239454  | 0.211068990  |
| Fe142 | 4.909621555   | 0.250027007   | -2.350327937 |
| Fe143 | 4.687378421   | 2.369269814   | -0.689050336 |
| Fe144 | 4.875621072   | -2.534998029  | 0.062931465  |
| Fe145 | 2.542172665   | -2.245297818  | -1.008812158 |
| H146  | -6.630598144  | -6.584582948  | -1.881571437 |
| H147  | -6.232478659  | -5.638649784  | -3.149867495 |
| H148  | -9.854259876  | -3.559545972  | -2.314200980 |
| H149  | -8.503880426  | -5.043405158  | -3.554318156 |
| H150  | -9.007726129  | -6.184342461  | -2.310566648 |
| H151  | -8.358331047  | -1.734443484  | -0.784198630 |
| H152  | -10.358445256 | -4.435722363  | 0.455834709  |
| H153  | -10.133572249 | -1.782256172  | -0.898378725 |
| H154  | -10.672404640 | -5.141174491  | 2.654071874  |
| H155  | -7.974159038  | -5.222198211  | 1.261585637  |
| H156  | -10.360436703 | -3.476699988  | 3.209212604  |
| H157  | -3.819505952  | -2.286324416  | 2.104062122  |
| H158  | -6.208101749  | -3.497684108  | 1.056673057  |
| H159  | -5.936907359  | -6.201831623  | 1.866134951  |
| H160  | -6.596747898  | 0.444481065   | 4.807733180  |
| H161  | -7.297668927  | -1.703600133  | 2.979861857  |
| H162  | -6.371645874  | -6.103264346  | 3.591382123  |
| H163  | -5.075778645  | -1.481410563  | 1.137608149  |
| H164  | -7.381103402  | -3.061483275  | 5.383703411  |
| H165  | -8.145061457  | -0.434225686  | 4.721522085  |
| H166  | -1.809052552  | -3.849369839  | 3.584341242  |

|      |              |              |               |
|------|--------------|--------------|---------------|
| H167 | -1.079623394 | -2.959511297 | 2.220523739   |
| H168 | -0.056214744 | -3.514022399 | 3.557457679   |
| H169 | -2.288065790 | -1.403861584 | 3.762569471   |
| H170 | -7.526718032 | -4.146638550 | 7.411118597   |
| H171 | -2.909085825 | 1.843413389  | 4.287063997   |
| H172 | -4.548596244 | -0.080127147 | 7.979672832   |
| H173 | -4.176774027 | 3.358727787  | 8.180940865   |
| H174 | -0.335254897 | -0.572880178 | 2.484386830   |
| H175 | 0.764830682  | -1.039119018 | 3.786762793   |
| H176 | 7.068985975  | 0.666900659  | 7.519542322   |
| H177 | -3.743119009 | 3.403164384  | 4.470358040   |
| H178 | -4.434871542 | 4.270549722  | 6.675916543   |
| H179 | -2.055517119 | 3.230277639  | 5.009633578   |
| H180 | -2.795656320 | 4.119296347  | 7.354942951   |
| H181 | -4.495899978 | 1.808911102  | 6.240777165   |
| H182 | -1.544403003 | 1.831787265  | 7.070702448   |
| H183 | -3.134096626 | -0.132320464 | 5.597830918   |
| H184 | -0.428153756 | 0.259411298  | 4.052129174   |
| H185 | 1.544031258  | 4.272930843  | 1.116481914   |
| H186 | 0.429405190  | 5.030910163  | 2.295580887   |
| H187 | 2.387353740  | 5.245915471  | 3.282281347   |
| H188 | 1.933408978  | 4.607563076  | 5.819415076   |
| H189 | 4.400553033  | 3.785609585  | 3.416816521   |
| H190 | 5.884773995  | 1.818227302  | 3.650853681   |
| H191 | 4.081893942  | 0.914567626  | 7.468951990   |
| H192 | -3.300383096 | -2.619773732 | 5.760181638   |
| H193 | -3.323827119 | -5.790183866 | 6.283126587   |
| H194 | -3.301053468 | -5.201804348 | 7.961886015   |
| H195 | -5.017469115 | -4.184748858 | 5.761456603   |
| H196 | -7.102446889 | -2.643303728 | 8.263650702   |
| H197 | 2.569083968  | 2.864294629  | 7.214616842   |
| H198 | -0.332728066 | -2.466656781 | 5.858259469   |
| H199 | -4.869536282 | 0.947233758  | 10.541417334  |
| H200 | -5.143978380 | -0.758006596 | 10.093175707  |
| H201 | -2.456499102 | -0.968589704 | 10.508606226  |
| H202 | 8.522943073  | -8.130157005 | 7.189117079   |
| H203 | -0.822683773 | -5.621728344 | -4.371620670  |
| H204 | -0.182287706 | -8.732172393 | 0.772025734   |
| H205 | -0.183286190 | -6.052335993 | -8.822270334  |
| H206 | 1.446212274  | -5.331127089 | -8.886797348  |
| H207 | -1.157329782 | -4.062077481 | -7.869660581  |
| H208 | 0.156737827  | 1.301020027  | -10.152759054 |
| H209 | -0.560435092 | -3.967167969 | -10.344810620 |
| H210 | -2.621068233 | -1.694335640 | -3.329274277  |
| H211 | -3.741840964 | -4.315020228 | -2.199062253  |
| H212 | 0.358777030  | -0.865414955 | -8.729429207  |
| H213 | -2.214085154 | 0.134823927  | -9.795642907  |
| H214 | 1.745735725  | -2.352767826 | -9.460089894  |
| H215 | -0.847173914 | -5.297675681 | -2.639458859  |
| H216 | 0.408163783  | -3.331517668 | -7.513005389  |
| H217 | 1.754606153  | -3.740277556 | -10.343773357 |
| H218 | -5.837461385 | -2.656476205 | -4.727318158  |
| H219 | -3.158057003 | -1.725907538 | -1.667656333  |
| H220 | 2.642372561  | -5.309385030 | -7.118649146  |
| H221 | -2.134611233 | -3.772216729 | -1.699162430  |
| H222 | -4.167596386 | 3.167260433  | 1.992602024   |
| H223 | -3.268586984 | 0.998270475  | 0.708551156   |
| H224 | -8.660575437 | 1.602641703  | 1.230424289   |
| H225 | -7.052962875 | 0.843263355  | -1.170968178  |
| H226 | -6.603436237 | 4.872230823  | 0.122308945   |
| H227 | -8.159822416 | 9.703470459  | 1.500033703   |

|      |              |              |              |
|------|--------------|--------------|--------------|
| H228 | -7.666531556 | 6.117006590  | 2.848812866  |
| H229 | -8.728348825 | 6.427577869  | 0.314154824  |
| H230 | -5.902355762 | 7.566755132  | 0.779165594  |
| H231 | -9.219226946 | 10.642620211 | -2.493570420 |
| H232 | -2.838118311 | 4.622618107  | 0.523098613  |
| H233 | -4.078368187 | 4.596039976  | -0.733446607 |
| H234 | -8.934142760 | 11.526359105 | -0.114499446 |
| H235 | -7.539830424 | 6.553464756  | -0.981412919 |
| H236 | -5.508815195 | 2.308191428  | -0.292625414 |
| H237 | -7.461683966 | 0.306479941  | 1.183591174  |
| H238 | -9.167240984 | 2.771738148  | -3.161084605 |
| H239 | -1.230838261 | 1.364627912  | -2.946336351 |
| H240 | -9.652016931 | 1.066539655  | -3.123151795 |
| H241 | 8.857428858  | 1.728631597  | 6.365221947  |
| H242 | 7.545204959  | 2.124242373  | 5.472377724  |
| H243 | 2.704788329  | 5.856659272  | -0.486681688 |
| H244 | -0.118483334 | 6.001354069  | 0.242614493  |
| H245 | 2.614335923  | 8.182688392  | 0.815628052  |
| H246 | -2.200772845 | 3.694126087  | -2.365564167 |
| H247 | -3.297417995 | 4.748559716  | -4.142139647 |
| H248 | -3.172513403 | 6.010029481  | -3.201351671 |
| H249 | -3.540502251 | 2.014289196  | -5.166837296 |
| H250 | -5.146221122 | 2.080752844  | -5.951674869 |
| H251 | 1.873623033  | 12.229763835 | -1.739448970 |
| H252 | 0.625595605  | 13.500015617 | -1.894322049 |
| H253 | 1.403582588  | 10.113943748 | -2.603873428 |
| H254 | -0.220995166 | 9.640060688  | -3.048896729 |
| H255 | 0.149014024  | 9.322697320  | -6.492434638 |
| H256 | 0.189972375  | 4.813061029  | -6.120206864 |
| H257 | -5.604982507 | 9.510741767  | -2.545508213 |
| H258 | -2.215907007 | 8.929830728  | 1.053860381  |
| H259 | -2.179376500 | 8.105618713  | -4.145714783 |
| H260 | 2.965727696  | 4.794387644  | -2.937491995 |
| H261 | 4.267902847  | 6.670466813  | -2.038690770 |
| H262 | 0.505735101  | 4.669009523  | -3.461254548 |
| H263 | -7.389639647 | 0.415479654  | -3.534832022 |
| H264 | 5.949776452  | 9.348482250  | -2.720458395 |
| H265 | -4.888391894 | -0.236799954 | -4.753056500 |
| H266 | 3.247532579  | 5.691165916  | -4.434069124 |
| H267 | -2.135570911 | 7.491979272  | -0.952212460 |
| H268 | -5.383698278 | 4.041335670  | -4.472145184 |
| H269 | 5.172631025  | 9.892094632  | -1.218583107 |
| H270 | 0.780115274  | 7.775389577  | -6.942069259 |
| H271 | -1.853812422 | 9.344059140  | -5.295672591 |
| H272 | -4.200197397 | -2.969854334 | -4.821161593 |
| H273 | -5.407237142 | -2.610142857 | -2.458878732 |
| H274 | -5.614369134 | 11.034600700 | -0.591705200 |
| H275 | -4.607813561 | 2.041317212  | -2.930692097 |
| H276 | 1.904065760  | 7.612613959  | -3.580985703 |
| H277 | 1.382480698  | 6.109684917  | -6.003328560 |
| H278 | 1.595308974  | 3.869990414  | -4.580848681 |
| H279 | -1.235690624 | 6.063868824  | -4.481708502 |
| H280 | 1.270812396  | 9.351850888  | 3.090002721  |
| H281 | 0.872526761  | 10.303825569 | -0.073860619 |
| H282 | 1.277130861  | 13.158504892 | 0.444654991  |
| H283 | 2.923419123  | 9.655728646  | 2.510666954  |
| H284 | -1.372790032 | 11.108609330 | 0.956491839  |
| H285 | 6.883285069  | -3.378863041 | -7.497749977 |
| H286 | 6.477102891  | -4.869035558 | -6.623678061 |
| H287 | 8.302368993  | -5.901398926 | -2.268066533 |
| H288 | 7.450473236  | -5.470238709 | -8.705101321 |

|      |              |               |              |
|------|--------------|---------------|--------------|
| H289 | 5.847602552  | -5.758920693  | -8.884314106 |
| H290 | 6.149138103  | 4.409181791   | 1.288522362  |
| H291 | 6.194388646  | 7.194110648   | 2.630337132  |
| H292 | 6.726464215  | 7.433226486   | -1.628754204 |
| H293 | 4.710135285  | 5.440346238   | 1.557707006  |
| H294 | 7.637489424  | 7.588742626   | 1.969399355  |
| H295 | 7.025125088  | 2.717348797   | -4.567221218 |
| H296 | 7.291171616  | 6.212188358   | 0.092233443  |
| H297 | 2.778409085  | -7.090062348  | 6.138379869  |
| H298 | 5.024436379  | -8.428320657  | 4.536589936  |
| H299 | 5.592506172  | 1.072200234   | -5.463185012 |
| H300 | 3.582025315  | -0.280853491  | 4.125077794  |
| H301 | 3.225754214  | 1.467666493   | -8.041927120 |
| H302 | -0.062153733 | -2.221294255  | -4.385607365 |
| H303 | 2.546840857  | 1.976832454   | -6.495970411 |
| H304 | 2.341819893  | -4.561676650  | 5.308804165  |
| H305 | 3.952528042  | -0.110849512  | -5.583472013 |
| H306 | 2.526573565  | -5.140287828  | 3.652068024  |
| H307 | 2.800562566  | -7.427194493  | 4.393086433  |
| H308 | 4.864022924  | -5.906684340  | 4.198867594  |
| H309 | 4.615057892  | -5.432749224  | 5.889234858  |
| H310 | -2.972183147 | -0.367644808  | -7.636899989 |
| H311 | 3.059057324  | -9.624202253  | 6.460067623  |
| H312 | 2.239426628  | -11.987136718 | 4.677946196  |
| H313 | 1.287663663  | -0.318269196  | -3.555534090 |
| H314 | 2.923259099  | -11.933117729 | 7.514643991  |
| H315 | 1.463359925  | -12.121795774 | 6.797163794  |
| H316 | 4.264718601  | -3.533956918  | 3.260437772  |
| H317 | 0.989773290  | 1.932081258   | -4.534344362 |
| H318 | -1.703309604 | -1.881981889  | -6.237403140 |
| H319 | 6.544564266  | -10.642781533 | 0.823123986  |
| H320 | 6.700921692  | -8.478941286  | -1.849512689 |
| H321 | 5.296122250  | -8.788322607  | 1.820404453  |
| H322 | 6.078270107  | -11.264989990 | -0.509763322 |
| H323 | 7.818637056  | 1.933374855   | -7.366289219 |
| H324 | 5.677374041  | -5.664927684  | 1.522874193  |
| H325 | 1.303222299  | -7.399275509  | 1.551721917  |
| H326 | 5.254611062  | -2.300951762  | -6.281664041 |
| H327 | 2.097749983  | -9.251284574  | -0.024912067 |
| H328 | 4.491836015  | -7.164511879  | -5.987135342 |
| H329 | 3.301811078  | -5.542824095  | -4.430977049 |
| H330 | 3.635818794  | -12.757066515 | 5.440071467  |
| H331 | 4.240150116  | -1.333547754  | 2.904135517  |
| H332 | 7.136868908  | -6.649107834  | 3.155758056  |
| H333 | 6.562789732  | -4.449266864  | 1.906778819  |
| H334 | 6.915933448  | -7.642175878  | 5.321809543  |
| H335 | 2.609289037  | -2.795407353  | 6.355260503  |
| H336 | 2.452582066  | -11.862978817 | -2.858768765 |
| H337 | 3.477484464  | -8.465023101  | -2.643353919 |
| H338 | 4.386587900  | -8.831733059  | -1.164659760 |
| H339 | 1.337151639  | -8.606665533  | -1.506999689 |
| H340 | 2.994704652  | -2.253476914  | -5.442296862 |
| H341 | -0.646335011 | 2.295592454   | -6.405536382 |
| H342 | -2.668653778 | 1.384867254   | -7.650069115 |
| H343 | 1.328976388  | -5.721898924  | 0.913212185  |
| H344 | 7.030621910  | -8.198609671  | 3.068115253  |
| H345 | 5.584274777  | -9.926882212  | 2.839303680  |
| H346 | 2.295043094  | -1.163768449  | 5.900909754  |
| H347 | 6.517461915  | -8.266406197  | -4.860478212 |
| H348 | 6.354909491  | -6.935186161  | -1.054040579 |
| H349 | 2.445265994  | -2.984237597  | -6.980139969 |

|       |              |               |              |
|-------|--------------|---------------|--------------|
| H350  | 6.443049681  | 3.892170051   | -5.773910412 |
| H351  | 5.515303832  | -0.768393350  | 6.290330122  |
| H352  | 6.286301520  | -0.366418804  | 4.737215559  |
| H353  | 9.838287244  | -7.298953458  | -3.354361147 |
| H354  | 8.963973994  | -8.653931136  | -3.074736336 |
| H355  | 9.346839867  | -9.740746235  | 1.349676986  |
| H356  | 8.052195453  | -9.040806183  | -0.393649392 |
| H357  | 11.392313692 | -8.781060747  | -0.205673028 |
| H358  | 9.270057002  | -8.055862049  | 1.910945304  |
| H359  | 8.702450014  | -1.189446381  | 5.669793438  |
| H360  | -2.310947455 | 13.473830529  | 2.938099184  |
| H361  | 7.196277928  | -7.744131147  | 8.317444721  |
| H362  | 7.345419684  | -5.288287878  | 7.076786813  |
| H363  | -3.528305517 | 12.850073664  | 0.230213414  |
| H364  | -3.408801245 | 10.661508658  | 2.397389316  |
| H365  | -4.883137090 | 11.426213087  | 1.775503022  |
| H366  | -4.561652952 | 7.738499345   | -3.547152013 |
| H367  | 2.000001768  | -1.001378232  | -0.115715237 |
| H368  | -0.164087489 | -1.275714292  | -0.586688360 |
| Mo369 | 3.883234447  | -4.648471937  | -1.281663752 |
| N370  | -6.969195398 | -6.248660864  | -2.786908020 |
| N371  | -9.199303314 | -3.525315226  | -1.536645873 |
| N372  | -9.937744561 | -3.862240138  | 1.183044446  |
| N373  | -7.754342038 | -5.259147516  | 2.256983633  |
| N374  | -5.640183178 | -3.338220867  | 1.890525116  |
| N375  | -6.607850954 | -1.277466921  | 3.603687357  |
| N376  | -6.950130478 | -2.577273520  | 6.175364310  |
| N377  | -4.654734715 | -4.231199874  | 6.718979146  |
| N378  | -2.341249191 | -2.859101618  | 6.002319758  |
| N379  | -2.405676313 | 0.111981099   | 6.271492772  |
| N380  | -3.954375112 | 0.264359997   | 8.737792571  |
| N381  | 2.340150586  | -11.601756291 | 6.743148911  |
| N382  | 3.713022061  | -9.552235067  | 5.673041865  |
| N383  | 3.719075051  | -3.495007428  | 4.126739529  |
| N384  | 2.585518900  | -2.095821530  | 5.621462350  |
| N385  | 3.596333663  | -1.214223193  | 3.719002766  |
| N386  | 6.637763116  | -7.715719390  | 6.324937474  |
| N387  | -4.909938454 | -2.271637951  | -4.533863394 |
| N388  | -1.256462467 | -5.166435927  | -3.565508656 |
| N389  | -5.131824592 | 0.272184622   | -3.888522331 |
| N390  | -7.607505752 | 1.399217258   | -3.393567387 |
| N391  | -7.798574599 | 1.306306591   | -0.633563158 |
| N392  | -5.700890409 | 2.789526674   | 0.585765563  |
| N393  | -2.288659555 | 2.850350546   | -1.783647019 |
| N394  | -2.167053930 | 0.725949767   | -1.120017508 |
| N395  | -6.206319512 | 5.478655926   | 0.836264328  |
| N396  | -8.600141918 | 8.750432208   | -1.660984715 |
| N397  | -8.769675836 | 10.560508690  | -0.387606920 |
| N398  | 8.137894910  | 1.337703592   | 5.752493495  |
| N399  | 6.965672568  | 6.821609287   | 2.066655594  |
| N400  | 6.007570771  | 7.974233614   | -1.155039621 |
| N401  | 3.628126710  | 7.354880650   | -2.471702567 |
| N402  | -0.466362226 | 6.475848874   | -5.053109124 |
| N403  | 0.250144009  | 8.335150311   | -6.283835581 |
| N404  | -1.506592169 | 8.535816931   | -4.785205904 |
| N405  | 1.783009019  | 6.329457482   | -0.534839990 |
| N406  | 1.737752783  | 8.513234929   | 1.230566799  |
| N407  | 0.887719615  | 11.125951963  | 0.531892555  |
| N408  | 0.398590556  | 10.325899298  | -2.618400307 |
| N409  | -1.683676886 | 12.072998704  | 0.869871797  |
| N410  | 6.540767093  | -5.010719622  | -8.789591128 |

|      |              |               |               |
|------|--------------|---------------|---------------|
| N411 | 4.506576561  | -2.782527432  | -6.794034573  |
| N412 | 3.523049772  | 0.110510937   | -6.502179013  |
| N413 | 5.639701345  | 1.972608397   | -5.958268604  |
| N414 | 1.210522040  | -2.897003388  | -10.148515445 |
| N415 | -0.589552907 | -0.907250511  | -9.117650899  |
| N416 | 8.880583921  | -7.648804599  | -3.258149573  |
| N417 | 4.818129658  | -6.099243841  | -3.008049718  |
| N418 | 4.802148957  | -6.960702556  | -5.041402537  |
| N419 | 8.809936550  | -8.406899442  | -0.141608462  |
| N420 | 0.375433288  | 1.718941152   | 0.349612573   |
| N421 | 1.289724029  | 1.198967892   | -0.060812987  |
| O422 | -7.265194358 | -4.345104139  | -0.653945994  |
| O423 | -8.784037319 | -1.963615196  | 1.681400191   |
| O424 | -8.357388185 | -4.537499849  | 4.342218278   |
| O425 | -4.750571048 | -4.195870486  | 3.799488469   |
| O426 | -4.438962492 | -0.691791756  | 3.962168558   |
| O427 | -6.276917501 | -0.588044923  | 7.074739111   |
| O428 | -5.116322294 | -4.016129061  | 8.958328153   |
| O429 | -1.005355348 | -4.516292510  | 6.873517004   |
| O430 | -0.331167295 | -0.349835276  | 7.105897591   |
| O431 | -2.270523777 | 1.613250144   | 9.437450459   |
| O432 | -3.274042675 | -0.217928671  | 12.220706340  |
| O433 | 4.675709904  | -10.873636130 | 4.036516488   |
| O434 | 4.945917210  | -8.164571353  | 7.817015199   |
| O435 | 9.178471516  | -5.702251576  | 7.870546427   |
| O436 | -5.483900072 | -0.152938421  | -1.657504442  |
| O437 | -2.759750858 | -4.114658689  | -4.907092230  |
| O438 | -6.757058859 | 3.520184430   | -3.445959493  |
| O439 | -4.537338910 | 3.801455419   | -4.934418988  |
| O440 | -9.853352994 | 2.338730200   | -0.685080206  |
| O441 | -6.735499901 | 2.590568389   | 2.612444373   |
| O442 | -4.697628043 | 5.624528070   | 2.543216825   |
| O443 | -7.171955551 | 8.090020769   | 3.016394600   |
| O444 | 8.116101667  | -1.677417982  | 7.563150684   |
| O445 | 2.587267030  | 4.545814455   | 5.099017634   |
| O446 | 4.731297183  | 8.203568605   | 0.719488701   |
| O447 | 3.203175064  | 9.583221816   | -2.850850485  |
| O448 | 0.140343320  | 7.153296088   | -1.900047203  |
| O449 | -0.297336330 | 7.825192324   | 2.028206211   |
| O450 | 2.414521477  | 5.683790641   | 2.407167457   |
| O451 | 1.629097330  | 11.951603458  | 2.534919263   |
| O452 | -1.118507982 | 14.161027034  | 0.148258214   |
| O453 | -1.310744468 | 11.836691265  | -2.494341552  |
| O454 | -4.183273274 | 14.112870739  | 2.428311778   |
| O455 | -3.783032972 | 7.579076294   | -2.979929132  |
| O456 | 3.919477301  | -4.670863979  | -7.965137334  |
| O457 | 2.291177962  | -0.770094952  | -8.223363541  |
| O458 | 4.579330114  | 3.539552268   | -7.242567074  |
| O459 | 9.068881165  | 3.100720051   | -6.250567933  |
| O460 | -2.242077309 | -2.197151734  | -10.021445028 |
| O461 | -0.083791450 | -6.427455819  | -6.220012592  |
| O462 | 2.032684404  | -5.763997872  | -6.456857332  |
| O463 | -0.950735109 | 2.641059912   | -9.092182454  |
| O464 | 9.954114238  | -6.476528566  | -0.456730275  |
| O465 | 11.862519910 | -8.436174747  | 1.750919972   |
| O466 | -0.728597013 | -6.130156789  | -0.667028020  |
| O467 | -0.755387350 | -8.172392462  | 0.214741961   |
| O468 | 4.353094107  | -11.288716436 | -1.732165021  |
| O469 | 2.349123416  | -10.900760645 | -2.697171259  |
| O470 | 4.579929462  | -6.222589042  | 0.191332930   |
| O471 | 3.847136217  | -7.932979839  | 1.461423696   |

|  |                          |              |               |              |
|--|--------------------------|--------------|---------------|--------------|
|  | O472                     | 2.461121386  | -6.197896921  | -1.360584267 |
|  | O473                     | 7.450892331  | -7.475399446  | 3.604822549  |
|  | O474                     | 6.230836200  | -5.297707897  | 2.260067460  |
|  | O475                     | -2.650699568 | 5.294017681   | -3.622758964 |
|  | O476                     | 6.852362137  | -11.232792653 | 0.089426323  |
|  | O477                     | 6.031147500  | -9.389681343  | 2.134258689  |
|  | S478                     | 4.822206820  | 4.680422439   | -0.746749877 |
|  | S479                     | 3.204508480  | 1.765844769   | -2.356295104 |
|  | S480                     | 2.777666594  | -3.387827912  | -2.943262811 |
|  | S481                     | 3.934149577  | 1.405211586   | 1.170326348  |
|  | S482                     | 0.280168823  | -2.395387233  | -1.215469827 |
|  | S483                     | 5.560257017  | -0.983477056  | -4.119743560 |
|  | S484                     | 2.999705487  | -3.601896309  | 0.670150278  |
|  | S485                     | 6.620240240  | 1.196122407   | -1.124147875 |
|  | S486                     | 6.074146606  | -3.710791395  | -1.399558229 |
|  | S487                     | 6.059057934  | -1.582151453  | 1.662852280  |
|  | <b>6-2u(c)</b>           |              |               |              |
|  | Fe( 139)                 | 0.551        | 2.350         |              |
|  | Fe( 140)                 | 0.376        | -1.559        |              |
|  | Fe( 141)                 | 0.557        | 2.743         |              |
|  | Fe( 142)                 | 0.549        | -2.610        |              |
|  | Fe( 143)                 | 0.569        | 2.921         |              |
|  | Fe( 144)                 | 0.504        | -2.294        |              |
|  | Fe( 145)                 | 0.394        | 1.085         |              |
|  | <b>S=3/2</b>             |              |               |              |
|  | bm1cnx2b262n2x47u3.car_1 |              |               |              |
|  | C1                       | -8.214249955 | -4.445718054  | -0.964461266 |
|  | C2                       | -8.303929800 | -5.580274141  | -1.991049090 |
|  | C3                       | -9.266341792 | -2.394202351  | -0.111498411 |
|  | C4                       | -9.249936239 | -2.674349760  | 1.388924332  |
|  | C5                       | -9.846510462 | -4.174863863  | 3.217088976  |
|  | C6                       | -8.453654672 | -4.561017328  | 3.728453040  |
|  | C7                       | -6.244108396 | -5.445128944  | 3.148353979  |
|  | C8                       | -5.366728246 | -4.192652285  | 3.248080308  |
|  | C9                       | -4.791410490 | -2.004489898  | 2.340031097  |
|  | C10                      | -5.125037972 | -1.161150167  | 3.578732559  |
|  | C11                      | -6.813797162 | -0.364635743  | 5.131683649  |
|  | C12                      | -6.401334863 | -1.000556531  | 6.466625385  |
|  | C13                      | -6.453133992 | -3.003976758  | 7.874162146  |
|  | C14                      | -5.057751565 | -3.568871015  | 8.167209299  |
|  | C15                      | -3.033533702 | -4.619410306  | 7.247072807  |
|  | C16                      | -1.803349967 | -3.801568725  | 6.844549147  |
|  | C17                      | -1.002229813 | -1.752567212  | 5.696579849  |
|  | C18                      | -0.975683163 | -0.408743450  | 6.448309824  |
|  | C19                      | -1.090852224 | -1.612224634  | 4.151917324  |
|  | C20                      | -0.098916259 | -0.579233547  | 3.608906946  |
|  | C21                      | -0.887773738 | -2.975590038  | 3.482133198  |
|  | C22                      | -2.197799081 | 1.631064243   | 7.092288669  |
|  | C23                      | -2.492833358 | 1.426779558   | 8.590706667  |
|  | C24                      | -3.216226667 | 2.578585161   | 6.414977654  |
|  | C25                      | -3.391223166 | 3.870560817   | 7.222861456  |
|  | C26                      | -2.787710661 | 2.903529871   | 4.977539470  |
|  | C27                      | -3.904517923 | 0.448414029   | 10.304808033 |
|  | C28                      | -2.729409856 | 0.037487449   | 11.168945387 |
|  | C29                      | 3.271140260  | -11.636630701 | 5.758991391  |
|  | C30                      | 4.127617538  | -10.498844466 | 5.205066114  |
|  | C31                      | 4.691338810  | -8.092056069  | 5.551138338  |
|  | C32                      | 5.683906994  | -7.799682087  | 6.690919170  |
|  | C33                      | 3.683554062  | -6.943774691  | 5.360915437  |
|  | C34                      | 4.342854072  | -5.611234634  | 4.998120904  |
|  | C35                      | 3.304465774  | -4.583318241  | 4.549994976  |
|  | C36                      | 3.531025510  | -2.096507720  | 4.415132713  |
|  | C37                      | 7.992819062  | -7.208746569  | 7.250256762  |
|  | C38                      | 8.438403620  | -5.761989650  | 7.256991286  |
|  | C39                      | -4.889674330 | -2.099853289  | -2.789077035 |
|  | C40                      | -5.279411538 | -0.637860723  | -2.523120805 |
|  | C41                      | -3.416229974 | -2.310061677  | -2.389671434 |
|  | C42                      | -2.988562772 | -3.781014658  | -2.217338996 |
|  | C43                      | -2.470890506 | -4.467307548  | -3.477178458 |



|      |              |              |              |
|------|--------------|--------------|--------------|
| C44  | -5.377154714 | 1.580127487  | -3.616470803 |
| C45  | -6.767421218 | 2.155004357  | -3.319834050 |
| C46  | -4.813381135 | 2.183099215  | -4.919200817 |
| C47  | -9.003606940 | 1.674292907  | -2.440240508 |
| C48  | -8.932364486 | 1.794203113  | -0.909372714 |
| C49  | -7.637347465 | 1.353245812  | 1.130687036  |
| C50  | -6.582935506 | 2.334044640  | 1.647932310  |
| C51  | -4.587799602 | 3.693481694  | 1.198438279  |
| C52  | -5.127296255 | 5.054414387  | 1.661703885  |
| C53  | -3.599908305 | 3.989472458  | 0.055352863  |
| C54  | -2.990876637 | 2.770020063  | -0.550411374 |
| C55  | -2.872008079 | 1.463816766  | -0.117421688 |
| C56  | -1.908088765 | 1.524403365  | -2.035162915 |
| C57  | -6.663846328 | 6.868080570  | 1.036339066  |
| C58  | -7.098163976 | 7.129469309  | 2.476607820  |
| C59  | -7.866688261 | 7.006142681  | 0.071552545  |
| C60  | -8.278842974 | 8.404208047  | -0.287284249 |
| C61  | -8.348086822 | 9.550065863  | 0.481521208  |
| C62  | -8.971757413 | 9.977932187  | -1.601743921 |
| C63  | 7.638514425  | 0.601108203  | 6.122021441  |
| C64  | 8.422271713  | -0.693115485 | 6.229787058  |
| C65  | 6.289002436  | 0.248648599  | 5.442887996  |
| C66  | 5.372903473  | 1.439813426  | 5.292606154  |
| C67  | 4.473281574  | 1.801161121  | 6.313657509  |
| C68  | 5.390474829  | 2.221793042  | 4.124730891  |
| C69  | 3.617636196  | 2.899771512  | 6.174983424  |
| C70  | 4.550916805  | 3.327326013  | 3.976186674  |
| C71  | 3.661118984  | 3.662796071  | 5.001343369  |
| C72  | 6.461492055  | 6.481319328  | 0.182069017  |
| C73  | 5.638710699  | 7.609708035  | -0.452107885 |
| C74  | 5.575516948  | 5.250034943  | 0.418390173  |
| C75  | 5.224356710  | 8.939434920  | -2.478871728 |
| C76  | 3.818058350  | 8.562853109  | -2.951725268 |
| C77  | 2.174427030  | 6.743351731  | -3.266970252 |
| C78  | 1.223681674  | 6.709218053  | -2.049795042 |
| C79  | 2.330830486  | 5.376988756  | -3.959387908 |
| C80  | 1.059939529  | 4.694169860  | -4.475845915 |
| C81  | 0.354954117  | 5.351393053  | -5.674237405 |
| C82  | -0.845115976 | 7.542320072  | -5.660235195 |
| C83  | 0.906117467  | 6.291674729  | 0.330634478  |
| C84  | 0.768045430  | 7.664285519  | 1.017650442  |
| C85  | 1.376708683  | 5.273850730  | 1.379429898  |
| C86  | 1.965316420  | 9.672775374  | 1.740757984  |
| C87  | 1.538811582  | 11.057344924 | 1.261977415  |
| C88  | 0.569441551  | 12.429277993 | -0.532781451 |
| C89  | -0.815731505 | 12.978762540 | -0.124242262 |
| C90  | 0.729772208  | 12.403594288 | -2.068493838 |
| C91  | -0.246947482 | 11.434638301 | -2.725169138 |
| C92  | -3.028145352 | 12.446686634 | 0.800594936  |
| C93  | -3.099912738 | 13.507301033 | 1.893239884  |
| C94  | -3.800630810 | 11.178409320 | 1.254817378  |
| C95  | -3.888228727 | 10.140522732 | 0.158692836  |
| C96  | -4.885637052 | 10.231322503 | -0.823559314 |
| C97  | -2.943917409 | 9.105826214  | 0.053158048  |
| C98  | -4.932327310 | 9.333735694  | -1.893060970 |
| C99  | -2.959415529 | 8.214360627  | -1.024338639 |
| C100 | -3.952018251 | 8.345414654  | -1.992981780 |
| C101 | 5.897961097  | -4.576086790 | -7.657215257 |
| C102 | 4.429987730  | -4.205614067 | -7.522121368 |
| C103 | 2.839379691  | -2.542416583 | -6.587907990 |
| C104 | 2.593172696  | -1.185592410 | -7.254505307 |

|       |               |               |              |
|-------|---------------|---------------|--------------|
| C105  | 3.082146953   | 1.209168022   | -7.170663742 |
| C106  | 4.280622072   | 2.143237486   | -7.030553936 |
| C107  | 6.471359998   | 2.622614046   | -6.045867705 |
| C108  | 7.656865676   | 2.346169928   | -6.947951468 |
| C109  | -0.566473972  | -3.638144394  | -9.462640711 |
| C110  | -1.531961753  | -2.446427619  | -9.453528465 |
| C111  | -0.508012812  | -4.276350241  | -8.055305725 |
| C112  | 0.122900749   | -5.680585881  | -8.109830264 |
| C113  | 0.452312642   | -6.175138657  | -6.719916412 |
| C114  | -1.872774944  | -0.080896907  | -8.928869875 |
| C115  | -1.134300271  | 1.142240992   | -9.435536891 |
| C116  | -2.549929631  | 0.103839833   | -7.549249874 |
| C117  | -1.576070905  | -0.017135656  | -6.405719593 |
| C118  | -0.802006686  | 1.076374486   | -5.983553602 |
| C119  | -1.370540046  | -1.264868882  | -5.792229088 |
| C120  | 0.169229698   | 0.910905570   | -4.990352041 |
| C121  | -0.399020676  | -1.427635116  | -4.802243221 |
| C122  | 0.381450434   | -0.339300060  | -4.403867298 |
| C123  | 8.138994592   | -7.069901367  | -2.228714008 |
| C124  | 9.000858495   | -7.287034182  | -0.973991339 |
| C125  | 6.668799326   | -7.463851775  | -2.008865099 |
| C126  | 5.726482211   | -7.124002531  | -3.122733089 |
| C127  | 5.658806099   | -7.712174616  | -4.371320517 |
| C128  | 3.989130525   | -6.276547144  | -4.140452110 |
| C129  | 9.609144170   | -8.658377194  | 0.939109549  |
| C130  | 11.088918704  | -8.580709494  | 0.635992370  |
| C131  | -0.134707605  | -6.935372832  | 0.282662471  |
| C132  | 1.249076211   | -6.757278821  | 0.846917574  |
| C133  | 2.389821376   | -7.135745144  | -0.180617133 |
| C134  | 2.197014302   | -8.605083400  | -0.659557697 |
| C135  | 3.372448931   | -9.096653365  | -1.520701835 |
| C136  | 3.369903834   | -10.575598305 | -1.777997866 |
| C137  | 3.729765175   | -7.098628972  | 0.618152484  |
| C138  | 4.079254706   | -1.111637212  | -1.211945762 |
| Fe139 | 4.520639892   | -2.426145050  | -2.625740134 |
| Fe140 | 2.809714650   | 0.329063477   | -0.666253976 |
| Fe141 | 5.351857751   | -0.069803488  | -0.042395295 |
| Fe142 | 4.809750746   | 0.130648897   | -2.581977429 |
| Fe143 | 4.570368769   | 2.347035842   | -1.128454206 |
| Fe144 | 4.904619582   | -2.554241139  | -0.062904778 |
| Fe145 | 2.473594420   | -2.334074919  | -1.010944395 |
| H146  | -6.709868549  | -6.650891619  | -1.304007828 |
| H147  | -6.368413878  | -5.754520555  | -2.623461012 |
| H148  | -9.969273267  | -3.655059202  | -1.685836282 |
| H149  | -8.647398102  | -5.164374209  | -2.951471737 |
| H150  | -9.106716598  | -6.255880602  | -1.647979886 |
| H151  | -8.385758412  | -1.768327512  | -0.314822790 |
| H152  | -10.318248767 | -4.410239453  | 1.128866917  |
| H153  | -10.164957058 | -1.807500278  | -0.345419615 |
| H154  | -10.525964466 | -5.024478156  | 3.366699994  |
| H155  | -7.905073594  | -5.158592536  | 1.843497151  |
| H156  | -10.193800245 | -3.341147308  | 3.841499042  |
| H157  | -3.710143318  | -2.193330827  | 2.364439330  |
| H158  | -6.144428409  | -3.446864558  | 1.482348248  |
| H159  | -5.839880769  | -6.115246128  | 2.377687959  |
| H160  | -6.354839474  | 0.631455178   | 5.097546492  |
| H161  | -7.146339470  | -1.584464210  | 3.390168736  |
| H162  | -6.187023242  | -5.955057334  | 4.117664440  |
| H163  | -5.015999658  | -1.428647370  | 1.430268461  |
| H164  | -7.106665092  | -2.846491893  | 5.848075087  |
| H165  | -7.906210384  | -0.245013789  | 5.121457187  |

|      |              |              |               |
|------|--------------|--------------|---------------|
| H166 | -1.633265983 | -3.710314958 | 3.818767307   |
| H167 | -0.970659494 | -2.879538431 | 2.389344398   |
| H168 | 0.115811063  | -3.375068607 | 3.697291858   |
| H169 | -2.108667272 | -1.258813008 | 3.921380695   |
| H170 | -7.163353380 | -3.842192619 | 7.925892860   |
| H171 | -2.712112923 | 2.003842061  | 4.350469281   |
| H172 | -4.154485090 | 0.229515337  | 8.197767916   |
| H173 | -3.758937237 | 3.681437983  | 8.241606935   |
| H174 | -0.217002254 | -0.483554005 | 2.520722012   |
| H175 | 0.940462245  | -0.884895611 | 3.793237549   |
| H176 | 7.425582787  | 0.954511249  | 7.148568300   |
| H177 | -3.521335575 | 3.578543494  | 4.512135314   |
| H178 | -4.115741259 | 4.526914129  | 6.718568402   |
| H179 | -1.808667561 | 3.410379821  | 4.973021551   |
| H180 | -2.435514432 | 4.412812517  | 7.301787693   |
| H181 | -4.191552519 | 2.059139751  | 6.382061983   |
| H182 | -1.203005580 | 2.099417395  | 7.068509694   |
| H183 | -2.871002083 | 0.078522132  | 5.762751736   |
| H184 | -0.248891427 | 0.416755245  | 4.052393561   |
| H185 | 1.601334352  | 4.317128670  | 0.877012884   |
| H186 | 0.538598466  | 5.115802855  | 2.076436374   |
| H187 | 2.551565733  | 5.362502636  | 2.954472846   |
| H188 | 2.207562895  | 4.834958859  | 5.531903262   |
| H189 | 4.553859921  | 3.901989451  | 3.049232258   |
| H190 | 6.038735646  | 1.937971940  | 3.292433111   |
| H191 | 4.428592662  | 1.208094098  | 7.231097334   |
| H192 | -3.023524431 | -2.389178618 | 6.025150297   |
| H193 | -3.011683328 | -5.542549874 | 6.648820450   |
| H194 | -2.908183973 | -4.895931664 | 8.302246915   |
| H195 | -4.729890759 | -3.955209891 | 6.151515304   |
| H196 | -6.681162090 | -2.307367863 | 8.691323423   |
| H197 | 2.909235085  | 3.150594364  | 6.969557617   |
| H198 | -0.054190361 | -2.240043467 | 5.960928281   |
| H199 | -4.361781674 | 1.357161373  | 10.729824429  |
| H200 | -4.646844661 | -0.364074918 | 10.360285205  |
| H201 | -1.939567275 | -0.548761241 | 10.644362488  |
| H202 | 8.864545940  | -7.859503227 | 7.084693214   |
| H203 | -1.035266713 | -5.788517702 | -4.109573795  |
| H204 | -0.144597355 | -8.695830854 | 1.077526501   |
| H205 | -0.593292080 | -6.380809418 | -8.563177378  |
| H206 | 1.031180830  | -5.665148567 | -8.729477596  |
| H207 | -1.520687391 | -4.358824307 | -7.631212263  |
| H208 | -0.316474498 | 0.920338576  | -10.161568536 |
| H209 | -1.055203895 | -4.364608642 | -10.130408772 |
| H210 | -2.773459776 | -1.809447639 | -3.128934809  |
| H211 | -3.836465996 | -4.385119394 | -1.846583846  |
| H212 | -0.058220973 | -1.200184498 | -8.692284902  |
| H213 | -2.681611736 | -0.237866791 | -9.670837347  |
| H214 | 1.291269149  | -2.711954816 | -9.441798047  |
| H215 | -0.971350115 | -5.402322598 | -2.391126565  |
| H216 | 0.060717545  | -3.615505779 | -7.384219137  |
| H217 | 1.254795510  | -4.134775829 | -10.265781089 |
| H218 | -6.056956352 | -2.824005392 | -4.334710749  |
| H219 | -3.239504286 | -1.782038175 | -1.443514474  |
| H220 | 2.307047018  | -5.591440295 | -7.023771512  |
| H221 | -2.207364597 | -3.827462276 | -1.446061604  |
| H222 | -4.064632646 | 3.244619805  | 2.055087873   |
| H223 | -3.222584635 | 1.038860806  | 0.821537213   |
| H224 | -8.590770048 | 1.658191461  | 1.580364663   |
| H225 | -7.098286853 | 0.806181881  | -0.864806413  |
| H226 | -6.596290677 | 4.875100831  | 0.249191546   |

|      |              |              |              |
|------|--------------|--------------|--------------|
| H227 | -8.106278430 | 9.746913346  | 1.520159607  |
| H228 | -7.563153292 | 6.241254438  | 2.969063068  |
| H229 | -8.720776589 | 6.431808945  | 0.475154921  |
| H230 | -5.875900271 | 7.589383144  | 0.766918370  |
| H231 | -9.317941858 | 10.547059065 | -2.460472403 |
| H232 | -2.823134395 | 4.652231626  | 0.470989913  |
| H233 | -4.120397725 | 4.573838659  | -0.722589021 |
| H234 | -8.941404494 | 11.513051661 | -0.126387707 |
| H235 | -7.584860052 | 6.512973021  | -0.873172876 |
| H236 | -5.518706779 | 2.298553662  | -0.119879725 |
| H237 | -7.401008489 | 0.354101305  | 1.526329457  |
| H238 | -9.317202002 | 2.652463336  | -2.825209148 |
| H239 | -1.356528385 | 1.263863993  | -2.934200950 |
| H240 | -9.790684028 | 0.949944642  | -2.689247486 |
| H241 | 9.150485726  | 1.962897861  | 5.859235022  |
| H242 | 7.794475525  | 2.318182976  | 5.014858431  |
| H243 | 2.678343492  | 5.845702744  | -0.834020065 |
| H244 | -0.109807843 | 6.008183547  | 0.018963464  |
| H245 | 2.643911297  | 8.205140529  | 0.384817079  |
| H246 | -2.310897159 | 3.612481286  | -2.404034399 |
| H247 | -3.501555328 | 4.588739487  | -4.165878224 |
| H248 | -3.323679897 | 5.886698933  | -3.276190603 |
| H249 | -3.785351387 | 1.823370134  | -5.064719164 |
| H250 | -5.427336258 | 1.854765304  | -5.776230167 |
| H251 | 1.774062913  | 12.148863764 | -2.301938718 |
| H252 | 0.520803489  | 13.413734193 | -2.444070767 |
| H253 | 1.265417419  | 10.000501495 | -3.052805537 |
| H254 | -0.377623691 | 9.511225705  | -3.403375514 |
| H255 | -0.174413625 | 9.067502317  | -6.852348878 |
| H256 | -0.101680391 | 4.577738597  | -6.310294849 |
| H257 | -5.727203084 | 9.406600152  | -2.639418021 |
| H258 | -2.175751860 | 8.970444337  | 0.819577796  |
| H259 | -2.383480718 | 7.938615349  | -4.349282077 |
| H260 | 2.820343906  | 4.680565868  | -3.260138631 |
| H261 | 4.156907091  | 6.583559376  | -2.485084269 |
| H262 | 0.336450431  | 4.537488135  | -3.660765608 |
| H263 | -7.550572478 | 0.287386393  | -3.190857479 |
| H264 | 5.812350154  | 9.223762221  | -3.362112926 |
| H265 | -5.109715306 | -0.411268182 | -4.499201963 |
| H266 | 3.029782662  | 5.519511964  | -4.800500148 |
| H267 | -2.183974121 | 7.453773350  | -1.126581289 |
| H268 | -5.600817742 | 3.873108433  | -4.362842450 |
| H269 | 5.109888170  | 9.832594168  | -1.849174118 |
| H270 | 0.438557901  | 7.505326820  | -7.269156046 |
| H271 | -2.111773283 | 9.138736334  | -5.556173932 |
| H272 | -4.425627870 | -3.146171730 | -4.495997723 |
| H273 | -5.514204105 | -2.692282454 | -2.092556631 |
| H274 | -5.645654172 | 11.012612129 | -0.754273792 |
| H275 | -4.749507429 | 1.938277117  | -2.781580692 |
| H276 | 1.726274084  | 7.472950300  | -3.954182667 |
| H277 | 1.093391439  | 5.876467802  | -6.294637756 |
| H278 | 1.371110131  | 3.691425387  | -4.798155744 |
| H279 | -1.452270090 | 5.887720662  | -4.657365444 |
| H280 | 1.401844415  | 9.477470719  | 2.665603681  |
| H281 | 0.849640923  | 10.287278588 | -0.511658751 |
| H282 | 1.287804487  | 13.156748372 | -0.127252527 |
| H283 | 3.029114179  | 9.746231510  | 2.005511345  |
| H284 | -1.337488074 | 11.144055589 | 0.598231683  |
| H285 | 6.514228370  | -3.665437449 | -7.670106495 |
| H286 | 6.158492166  | -5.122843912 | -6.727370785 |
| H287 | 8.187336065  | -5.990661271 | -2.433652060 |

|      |              |               |              |
|------|--------------|---------------|--------------|
| H288 | 7.030588668  | -5.798762443  | -8.832060736 |
| H289 | 5.420030300  | -6.091337992  | -8.924710663 |
| H290 | 6.199628933  | 4.442598053   | 0.822060641  |
| H291 | 6.329819341  | 7.290746889   | 2.051135000  |
| H292 | 6.634904857  | 7.351691527   | -2.231842682 |
| H293 | 4.783859885  | 5.497985374   | 1.139851916  |
| H294 | 7.728412604  | 7.658762211   | 1.288372618  |
| H295 | 6.789230394  | 2.538736762   | -4.994803188 |
| H296 | 7.276846578  | 6.199163639   | -0.502750632 |
| H297 | 3.081843252  | -6.840028127  | 6.279345249  |
| H298 | 5.233672460  | -8.249155721  | 4.611178934  |
| H299 | 5.314578808  | 0.862818468   | -5.750610903 |
| H300 | 3.753114746  | -0.124151666  | 3.942519801  |
| H301 | 2.843542933  | 1.147525727   | -8.240657911 |
| H302 | -0.252352915 | -2.393531031  | -4.315235189 |
| H303 | 2.229777919  | 1.717517713   | -6.689495276 |
| H304 | 2.599015365  | -4.358986318  | 5.360546332  |
| H305 | 3.680313483  | -0.335130730  | -5.754074767 |
| H306 | 2.710104479  | -4.992021853  | 3.715231449  |
| H307 | 3.002370162  | -7.254511860  | 4.552221227  |
| H308 | 5.057662003  | -5.756084404  | 4.173799072  |
| H309 | 4.909189101  | -5.209278387  | 5.853653773  |
| H310 | -3.331961625 | -0.663759688  | -7.459904964 |
| H311 | 3.378211481  | -9.374423933  | 6.680144544  |
| H312 | 2.466692958  | -11.797031837 | 5.024584820  |
| H313 | 1.124333685  | -0.459384061  | -3.613778071 |
| H314 | 3.299659646  | -11.635820713 | 7.818448853  |
| H315 | 1.804149318  | -11.856161829 | 7.185427580  |
| H316 | 4.432529099  | -3.412066621  | 3.194521242  |
| H317 | 0.767212752  | 1.757456064   | -4.647529944 |
| H318 | -1.987263822 | -2.117742548  | -6.087014326 |
| H319 | 6.585507371  | -10.602291383 | 0.918368938  |
| H320 | 6.622226518  | -8.556488441  | -1.848755795 |
| H321 | 5.384936892  | -8.715073674  | 1.895558724  |
| H322 | 6.051815391  | -11.272266596 | -0.365441676 |
| H323 | 7.455809946  | 1.651982802   | -7.799558320 |
| H324 | 5.763036338  | -5.603195992  | 1.447832925  |
| H325 | 1.384555732  | -7.351759510  | 1.762626906  |
| H326 | 4.943891485  | -2.546283018  | -6.426799678 |
| H327 | 2.106714375  | -9.249606652  | 0.229479646  |
| H328 | 4.207934458  | -7.402518152  | -5.917625974 |
| H329 | 3.091304991  | -5.720156159  | -4.374206112 |
| H330 | 3.903394026  | -12.541067017 | 5.738606542  |
| H331 | 4.368157959  | -1.222232953  | 2.740734552  |
| H332 | 7.288988761  | -6.528251860  | 3.065100510  |
| H333 | 6.634830321  | -4.360450875  | 1.784119868  |
| H334 | 7.168814580  | -7.440907757  | 5.272704833  |
| H335 | 2.920610969  | -2.551586888  | 6.323164711  |
| H336 | 2.337691737  | -11.976195036 | -2.518061730 |
| H337 | 3.350149196  | -8.572414643  | -2.487997924 |
| H338 | 4.329578899  | -8.869902109  | -1.038753038 |
| H339 | 1.264768151  | -8.672671261  | -1.238451731 |
| H340 | 2.723543843  | -2.470005786  | -5.495363233 |
| H341 | -0.960089673 | 2.054759938   | -6.446024554 |
| H342 | -3.041080722 | 1.088948425   | -7.559272139 |
| H343 | 1.388116528  | -5.693162485  | 1.079670829  |
| H344 | 7.172749002  | -8.078546055  | 3.038626690  |
| H345 | 5.717004603  | -9.809110375  | 2.947027078  |
| H346 | 2.570600224  | -0.942494048  | 5.823075263  |
| H347 | 6.286752177  | -8.459522648  | -4.844886015 |
| H348 | 6.305264384  | -6.988769148  | -1.088683793 |

|       |              |               |              |
|-------|--------------|---------------|--------------|
| H349  | 2.110919212  | -3.250459451  | -6.986173362 |
| H350  | 6.153358769  | 3.663516027   | -6.220174716 |
| H351  | 5.802687381  | -0.525210409  | 6.056571842  |
| H352  | 6.499915206  | -0.188881491  | 4.453461107  |
| H353  | 9.672397511  | -7.421903371  | -3.544052378 |
| H354  | 8.822511798  | -8.768871698  | -3.170234829 |
| H355  | 9.399335495  | -9.681959860  | 1.286949481  |
| H356  | 8.033177024  | -9.065277655  | -0.437043280 |
| H357  | 11.368836884 | -8.825852917  | -0.416936335 |
| H358  | 9.363086603  | -7.967880581  | 1.762428037  |
| H359  | 8.926953293  | -0.996823927  | 5.281136531  |
| H360  | -2.198281259 | 13.576521722  | 2.546704703  |
| H361  | 7.588076765  | -7.425000045  | 8.254695143  |
| H362  | 7.668617978  | -5.025285603  | 6.919445185  |
| H363  | -3.517018253 | 12.864061451  | -0.094915535 |
| H364  | -3.310180325 | 10.757458570  | 2.146315118  |
| H365  | -4.807498347 | 11.501097882  | 1.557564320  |
| H366  | -4.728844821 | 7.595335741   | -3.614475645 |
| H367  | 2.014032034  | -1.079585464  | -0.093476672 |
| H368  | -0.169115680 | -1.290643051  | -0.523178152 |
| Mo369 | 3.840638178  | -4.722961758  | -1.278098151 |
| N370  | -7.088856718 | -6.348308353  | -2.205045842 |
| N371  | -9.269331255 | -3.583044482  | -0.951581554 |
| N372  | -9.872342402 | -3.802605608  | 1.812243959  |
| N373  | -7.632660710 | -5.154136890  | 2.825894520  |
| N374  | -5.534404362 | -3.256719215  | 2.279344141  |
| N375  | -6.426413830 | -1.136952227  | 3.962782605  |
| N376  | -6.638073670 | -2.331851478  | 6.598101253  |
| N377  | -4.322852386 | -3.968581098  | 7.091900578  |
| N378  | -2.052063568 | -2.620209821  | 6.222300398  |
| N379  | -2.106058743 | 0.353542367   | 6.382723715  |
| N380  | -3.528010804 | 0.608811573   | 8.911040588  |
| N381  | 2.675251871  | -11.337616959 | 7.066037424  |
| N382  | 3.986159135  | -9.329517168  | 5.855433140  |
| N383  | 3.927296584  | -3.336990991  | 4.082791719  |
| N384  | 2.845262516  | -1.884900920  | 5.562188289  |
| N385  | 3.773942862  | -1.076442790  | 3.584031947  |
| N386  | 6.939483095  | -7.479920981  | 6.290316263  |
| N387  | -5.120193585 | -2.435048753  | -4.201974827 |
| N388  | -1.425160393 | -5.299671087  | -3.300123426 |
| N389  | -5.309462648 | 0.132731840   | -3.644500744 |
| N390  | -7.763399556 | 1.275511124   | -3.078405973 |
| N391  | -7.819055799 | 1.288218832   | -0.309458556 |
| N392  | -5.669388097 | 2.814790942   | 0.746585454  |
| N393  | -2.367874861 | 2.792221127   | -1.786514674 |
| N394  | -2.205344257 | 0.697737176   | -1.044155156 |
| N395  | -6.176580832 | 5.505941659   | 0.928670291  |
| N396  | -8.671261463 | 8.685509995   | -1.586834256 |
| N397  | -8.789051377 | 10.539153441  | -0.372533997 |
| N398  | 8.401268697  | 1.545093202   | 5.302126882  |
| N399  | 7.066930951  | 6.895256379   | 1.457965124  |
| N400  | 5.940895054  | 7.914809563   | -1.747042590 |
| N401  | 3.500284009  | 7.251699013   | -2.919226747 |
| N402  | -0.711820493 | 6.277624898   | -5.276242637 |
| N403  | -0.050437324 | 8.091885681   | -6.601947992 |
| N404  | -1.745466075 | 8.343678788   | -5.038696643 |
| N405  | 1.751751791  | 6.312970052   | -0.859363926 |
| N406  | 1.787680977  | 8.553525059   | 0.826575710  |
| N407  | 0.895674155  | 11.133186509  | 0.058429191  |
| N408  | 0.260493838  | 10.212409152  | -3.028805523 |
| N409  | -1.648750921 | 12.106320739  | 0.492578774  |

|      |              |               |               |
|------|--------------|---------------|---------------|
| N410 | 6.117526813  | -5.342122345  | -8.888068986  |
| N411 | 4.174999944  | -3.044365653  | -6.890441822  |
| N412 | 3.213187654  | -0.144405767  | -6.663228231  |
| N413 | 5.344289261  | 1.738434112   | -6.288710334  |
| N414 | 0.720570942  | -3.283962038  | -10.076764759 |
| N415 | -1.024620127 | -1.255366584  | -9.031713619  |
| N416 | 8.722696200  | -7.772202247  | -3.388471448  |
| N417 | 4.670859253  | -6.221992400  | -2.999685748  |
| N418 | 4.560117941  | -7.162853507  | -4.994947929  |
| N419 | 8.798512181  | -8.419522641  | -0.244256076  |
| N420 | 0.398225585  | 1.726330447   | 0.332799615   |
| N421 | 1.282387117  | 1.171592538   | -0.103441902  |
| O422 | -7.272484901 | -4.338405221  | -0.157817777  |
| O423 | -8.696088998 | -1.885438268  | 2.171209653   |
| O424 | -8.134816668 | -4.362404883  | 4.912185518   |
| O425 | -4.560013330 | -4.040876405  | 4.179510328   |
| O426 | -4.247534618 | -0.524324572  | 4.183255244   |
| O427 | -5.922989555 | -0.307474266  | 7.381773266   |
| O428 | -4.677979947 | -3.678666548  | 9.341613984   |
| O429 | -0.670190812 | -4.249696643  | 7.072993438   |
| O430 | 0.031304306  | -0.057556056  | 7.082031116   |
| O431 | -1.818099254 | 1.992317992   | 9.467804221   |
| O432 | -2.674010562 | 0.254073473   | 12.371260188  |
| O433 | 4.856302428  | -10.704440373 | 4.211056613   |
| O434 | 5.323576025  | -7.865882318  | 7.879424516   |
| O435 | 9.547878321  | -5.403772368  | 7.618688745   |
| O436 | -5.558628581 | -0.209504249  | -1.383992221  |
| O437 | -2.994841852 | -4.295425469  | -4.602645129  |
| O438 | -6.922888883 | 3.393583706   | -3.256229556  |
| O439 | -4.777811300 | 3.616952862   | -4.858417817  |
| O440 | -9.877930104 | 2.314010421   | -0.301600503  |
| O441 | -6.591586017 | 2.681572889   | 2.832220091   |
| O442 | -4.574288000 | 5.723746416   | 2.540911123   |
| O443 | -7.004592562 | 8.203072104   | 3.046498737   |
| O444 | 8.494690469  | -1.378823016  | 7.239765428   |
| O445 | 2.833856564  | 4.748542041   | 4.789680817   |
| O446 | 4.758794890  | 8.225126194   | 0.177214553   |
| O447 | 3.060545382  | 9.464432432   | -3.368476449  |
| O448 | 0.037724272  | 7.056892213   | -2.183642029  |
| O449 | -0.213262038 | 7.900863093   | 1.734960225   |
| O450 | 2.522176537  | 5.781485165   | 2.070390256   |
| O451 | 1.757836810  | 12.049366780  | 1.968742638   |
| O452 | -1.117952005 | 14.160594822  | -0.341268295  |
| O453 | -1.440610771 | 11.732282231  | -2.893731591  |
| O454 | -4.085789916 | 14.203472548  | 2.079648021   |
| O455 | -3.920883722 | 7.462507777   | -3.082347876  |
| O456 | 3.536820469  | -4.976241341  | -7.959810435  |
| O457 | 1.885951326  | -1.077092518  | -8.280705287  |
| O458 | 4.225562972  | 3.255735714   | -7.582257412  |
| O459 | 8.758009357  | 2.842363835   | -6.773539438  |
| O460 | -2.721598389 | -2.579659173  | -9.790694008  |
| O461 | -0.378333185 | -6.657812153  | -5.957535886  |
| O462 | 1.730865123  | -6.022711227  | -6.318073010  |
| O463 | -1.412650614 | 2.292837138   | -9.131400441  |
| O464 | 9.921148886  | -6.501515658  | -0.677497309  |
| O465 | 11.939924817 | -8.347657746  | 1.483063150   |
| O466 | -0.751769257 | -6.115664741  | -0.377717520  |
| O467 | -0.741183042 | -8.145242025  | 0.535577044   |
| O468 | 4.279256634  | -11.352297955 | -1.490185379  |
| O469 | 2.237473320  | -11.008341747 | -2.392791782  |
| O470 | 4.609398011  | -6.256081956  | 0.183956148   |

|  |                           |              |               |              |
|--|---------------------------|--------------|---------------|--------------|
|  | O471                      | 3.913433327  | -7.887043652  | 1.575201023  |
|  | O472                      | 2.394424460  | -6.250191490  | -1.237187822 |
|  | O473                      | 7.620272862  | -7.338611095  | 3.528738456  |
|  | O474                      | 6.339265210  | -5.215684153  | 2.155850655  |
|  | O475                      | -2.825851311 | 5.152868998   | -3.701519131 |
|  | O476                      | 6.854406242  | -11.223850443 | 0.194495979  |
|  | O477                      | 6.134226352  | -9.304351741  | 2.201061848  |
|  | S478                      | 4.748758977  | 4.652095599   | -1.126744343 |
|  | S479                      | 3.078958894  | 1.603623546   | -2.593634901 |
|  | S480                      | 2.611325273  | -3.556263224  | -2.907992689 |
|  | S481                      | 3.987410851  | 1.472720045   | 0.906839913  |
|  | S482                      | 0.252286438  | -2.339829514  | -1.275919587 |
|  | S483                      | 5.263974781  | -1.180571255  | -4.340911812 |
|  | S484                      | 3.089793015  | -3.599355128  | 0.699800718  |
|  | S485                      | 6.505552217  | 1.184456004   | -1.579814968 |
|  | S486                      | 6.011660524  | -3.766477170  | -1.562239679 |
|  | S487                      | 6.191890841  | -1.546852849  | 1.410028750  |
|  | <b>6<sup>-2</sup>u(d)</b> |              |               |              |
|  | Fe( 139)                  | 0.566        | 2.527         |              |
|  | Fe( 140)                  | 0.366        | -1.581        |              |
|  | Fe( 141)                  | 0.554        | 2.649         |              |
|  | Fe( 142)                  | 0.555        | -2.710        |              |
|  | Fe( 143)                  | 0.565        | 2.873         |              |
|  | Fe( 144)                  | 0.492        | -2.091        |              |
|  | Fe( 145)                  | 0.396        | -0.888        |              |
|  | <b>S=1/2</b>              |              |               |              |
|  | bm1cnx2b262n2x471.car_3   |              |               |              |
|  | C1                        | -8.225054210 | -4.449043298  | -0.965326805 |
|  | C2                        | -8.314630313 | -5.582795945  | -1.992735231 |
|  | C3                        | -9.278117603 | -2.399054599  | -0.110245838 |
|  | C4                        | -9.255100593 | -2.678855019  | 1.389961013  |
|  | C5                        | -9.845521107 | -4.178933995  | 3.220535865  |
|  | C6                        | -8.450759728 | -4.561823270  | 3.729178687  |
|  | C7                        | -6.241333165 | -5.444208337  | 3.146472875  |
|  | C8                        | -5.365192678 | -4.190993226  | 3.245817226  |
|  | C9                        | -4.791375644 | -2.003367880  | 2.335677320  |
|  | C10                       | -5.123740853 | -1.158435952  | 3.573658039  |
|  | C11                       | -6.809897451 | -0.362300299  | 5.129348266  |
|  | C12                       | -6.396567381 | -0.997995734  | 6.463968919  |
|  | C13                       | -6.452099350 | -3.000751085  | 7.872469078  |
|  | C14                       | -5.058586506 | -3.570605196  | 8.166049108  |
|  | C15                       | -3.035338370 | -4.625008911  | 7.246988617  |
|  | C16                       | -1.804760063 | -3.805973732  | 6.848113792  |
|  | C17                       | -1.002601702 | -1.753110424  | 5.705905640  |
|  | C18                       | -0.976346531 | -0.410540122  | 6.458727021  |
|  | C19                       | -1.094770941 | -1.611840636  | 4.164432646  |
|  | C20                       | -0.102773151 | -0.579028414  | 3.619106078  |
|  | C21                       | -0.891009998 | -2.974323019  | 3.490657335  |
|  | C22                       | -2.196231672 | 1.632743620   | 7.098606407  |
|  | C23                       | -2.492180919 | 1.430645295   | 8.598316909  |
|  | C24                       | -3.213423533 | 2.581677082   | 6.420093663  |
|  | C25                       | -3.386835921 | 3.873986505   | 7.228389388  |
|  | C26                       | -2.782635119 | 2.904658553   | 4.983915665  |
|  | C27                       | -3.902855139 | 0.452317158   | 10.312052234 |
|  | C28                       | -2.729784627 | 0.038896696   | 11.176053553 |
|  | C29                       | 3.273523415  | -11.644068949 | 5.769035918  |
|  | C30                       | 4.125418648  | -10.506611200 | 5.210354317  |
|  | C31                       | 4.687131824  | -8.099701566  | 5.553080264  |
|  | C32                       | 5.678144762  | -7.807430110  | 6.693733631  |
|  | C33                       | 3.680014422  | -6.951111304  | 5.361701028  |
|  | C34                       | 4.341010524  | -5.618852233  | 5.002346726  |
|  | C35                       | 3.305130910  | -4.588595216  | 4.554825977  |
|  | C36                       | 3.536292248  | -2.103442611  | 4.408272729  |
|  | C37                       | 7.985968818  | -7.217501744  | 7.253987399  |
|  | C38                       | 8.431671286  | -5.771312773  | 7.263470274  |
|  | C39                       | -4.899751471 | -2.095209259  | -2.787743148 |
|  | C40                       | -5.282016144 | -0.631752721  | -2.523978349 |
|  | C41                       | -3.426011972 | -2.303538012  | -2.387350643 |
|  | C42                       | -2.992525047 | -3.772791891  | -2.214150421 |



|      |              |              |              |
|------|--------------|--------------|--------------|
| C43  | -2.474050544 | -4.456374325 | -3.474707623 |
| C44  | -5.379294495 | 1.584499075  | -3.619468102 |
| C45  | -6.770510988 | 2.160548945  | -3.321497339 |
| C46  | -4.816915019 | 2.188478968  | -4.922509639 |
| C47  | -9.005949751 | 1.677654628  | -2.436738473 |
| C48  | -8.932159926 | 1.793807226  | -0.906899586 |
| C49  | -7.632640927 | 1.348056591  | 1.129256699  |
| C50  | -6.576940131 | 2.328852134  | 1.646659915  |
| C51  | -4.582412254 | 3.690720381  | 1.190828097  |
| C52  | -5.128382029 | 5.047928429  | 1.660444793  |
| C53  | -3.606393058 | 3.995583408  | 0.041802284  |
| C54  | -2.985671681 | 2.781096950  | -0.560006647 |
| C55  | -2.859872267 | 1.475751304  | -0.127531899 |
| C56  | -1.887340008 | 1.542249638  | -2.040308035 |
| C57  | -6.671504358 | 6.858990244  | 1.033260794  |
| C58  | -7.104937479 | 7.120113536  | 2.476691659  |
| C59  | -7.872692612 | 6.995835754  | 0.069014671  |
| C60  | -8.281974638 | 8.392646554  | -0.290395062 |
| C61  | -8.353640363 | 9.538150703  | 0.477938266  |
| C62  | -8.966574878 | 9.967224687  | -1.608925841 |
| C63  | 7.631715840  | 0.603346760  | 6.120290276  |
| C64  | 8.413224532  | -0.691818747 | 6.234511983  |
| C65  | 6.281787925  | 0.250476575  | 5.443391025  |
| C66  | 5.366075063  | 1.442564972  | 5.291666846  |
| C67  | 4.466723700  | 1.805490809  | 6.312481879  |
| C68  | 5.385752185  | 2.225558748  | 4.124099637  |
| C69  | 3.613012124  | 2.905303798  | 6.173849448  |
| C70  | 4.548065489  | 3.332897561  | 3.976108414  |
| C71  | 3.657922228  | 3.668688931  | 5.000904341  |
| C72  | 6.462176360  | 6.478459418  | 0.180606837  |
| C73  | 5.639828945  | 7.607088746  | -0.455463942 |
| C74  | 5.573829077  | 5.250547112  | 0.427359354  |
| C75  | 5.226724754  | 8.939427619  | -2.481501404 |
| C76  | 3.819235674  | 8.565705671  | -2.953206449 |
| C77  | 2.175148720  | 6.746126066  | -3.269104666 |
| C78  | 1.224541262  | 6.710880399  | -2.051802342 |
| C79  | 2.333462110  | 5.380330735  | -3.962028014 |
| C80  | 1.063685819  | 4.696503773  | -4.479951750 |
| C81  | 0.358780080  | 5.353839746  | -5.678518989 |
| C82  | -0.845197893 | 7.542660576  | -5.665038959 |
| C83  | 0.908959584  | 6.291417643  | 0.328645256  |
| C84  | 0.769296451  | 7.662797784  | 1.016663323  |
| C85  | 1.383314719  | 5.273137417  | 1.376131117  |
| C86  | 1.965232632  | 9.671643124  | 1.740992522  |
| C87  | 1.541129673  | 11.056587864 | 1.260537153  |
| C88  | 0.571899231  | 12.427510448 | -0.534938261 |
| C89  | -0.813808070 | 12.974788024 | -0.125230962 |
| C90  | 0.731912005  | 12.402652666 | -2.070520795 |
| C91  | -0.245264212 | 11.434587486 | -2.727829386 |
| C92  | -3.025697086 | 12.441178300 | 0.799682246  |
| C93  | -3.096044152 | 13.503147807 | 1.890568896  |
| C94  | -3.796383649 | 11.172165169 | 1.256521416  |
| C95  | -3.885602356 | 10.134062851 | 0.161083691  |
| C96  | -4.884917439 | 10.223250151 | -0.819242413 |
| C97  | -2.940481437 | 9.100025045  | 0.054401568  |
| C98  | -4.931840645 | 9.325796863  | -1.888496756 |
| C99  | -2.956608492 | 8.208182492  | -1.023289179 |
| C100 | -3.950392797 | 8.339107267  | -1.990948459 |
| C101 | 5.895961675  | -4.572145255 | -7.661425832 |
| C102 | 4.427176405  | -4.206174754 | -7.524986675 |
| C103 | 2.832010630  | -2.542285789 | -6.596139411 |

|       |               |               |              |
|-------|---------------|---------------|--------------|
| C104  | 2.586531453   | -1.185655372  | -7.265700203 |
| C105  | 3.080510361   | 1.211561536   | -7.188871177 |
| C106  | 4.275689186   | 2.147287023   | -7.036848790 |
| C107  | 6.460593304   | 2.622712368   | -6.035510217 |
| C108  | 7.646828409   | 2.350050359   | -6.939094895 |
| C109  | -0.571934831  | -3.641275866  | -9.464603925 |
| C110  | -1.538080237  | -2.449580180  | -9.457218261 |
| C111  | -0.511133392  | -4.277549984  | -8.056865441 |
| C112  | 0.123731136   | -5.680338845  | -8.108320403 |
| C113  | 0.450769001   | -6.172398774  | -6.716488071 |
| C114  | -1.881028412  | -0.085202084  | -8.925692240 |
| C115  | -1.145147466  | 1.139139501   | -9.432906579 |
| C116  | -2.558249766  | 0.099475848   | -7.545760677 |
| C117  | -1.580007206  | -0.014921257  | -6.405669764 |
| C118  | -0.809862128  | 1.083432997   | -5.989786773 |
| C119  | -1.361271466  | -1.261609699  | -5.794326364 |
| C120  | 0.174385442   | 0.922332450   | -5.009164685 |
| C121  | -0.377897088  | -1.419344315  | -4.815031824 |
| C122  | 0.402747220   | -0.327453258  | -4.427530680 |
| C123  | 8.142798023   | -7.074174292  | -2.226931005 |
| C124  | 9.003359087   | -7.292896097  | -0.971283500 |
| C125  | 6.672536818   | -7.468123219  | -2.011967017 |
| C126  | 5.733442784   | -7.124019485  | -3.126790166 |
| C127  | 5.660484335   | -7.711633342  | -4.374870547 |
| C128  | 3.998611374   | -6.267226053  | -4.141746530 |
| C129  | 9.610115615   | -8.663385310  | 0.940672089  |
| C130  | 11.090282786  | -8.583722675  | 0.638621058  |
| C131  | -0.118695339  | -6.920561177  | 0.280039154  |
| C132  | 1.261595521   | -6.756305876  | 0.852127672  |
| C133  | 2.400152402   | -7.137790576  | -0.177771881 |
| C134  | 2.204204455   | -8.603859825  | -0.661679572 |
| C135  | 3.380425589   | -9.092201879  | -1.522409348 |
| C136  | 3.374864546   | -10.570532985 | -1.777633111 |
| C137  | 3.741548010   | -7.103301155  | 0.617432685  |
| C138  | 4.070785685   | -1.123346826  | -1.209594414 |
| Fe139 | 4.581605738   | -2.418810864  | -2.645873904 |
| Fe140 | 2.799535935   | 0.334177498   | -0.659460810 |
| Fe141 | 5.342418318   | -0.085005340  | -0.058603722 |
| Fe142 | 4.772057847   | 0.158816636   | -2.592328810 |
| Fe143 | 4.527381530   | 2.364297913   | -1.132574829 |
| Fe144 | 4.877816574   | -2.569304781  | -0.064812540 |
| Fe145 | 2.485276810   | -2.320805297  | -0.997179493 |
| H146  | -6.717190385  | -6.647975392  | -1.307058196 |
| H147  | -6.379168298  | -5.749702360  | -2.625730117 |
| H148  | -9.982942848  | -3.661496765  | -1.683132645 |
| H149  | -8.659786035  | -5.166549251  | -2.952447736 |
| H150  | -9.115374935  | -6.260452877  | -1.649447399 |
| H151  | -8.399247102  | -1.772107922  | -0.317730840 |
| H152  | -10.324697168 | -4.414837759  | 1.134304919  |
| H153  | -10.178863490 | -1.814522158  | -0.340969252 |
| H154  | -10.522841562 | -5.029879955  | 3.372321622  |
| H155  | -7.904535993  | -5.159997264  | 1.843719910  |
| H156  | -10.193089176 | -3.345602582  | 3.845280259  |
| H157  | -3.709968126  | -2.191777036  | 2.358960943  |
| H158  | -6.144886076  | -3.446424844  | 1.480422867  |
| H159  | -5.837167489  | -6.113388005  | 2.374987850  |
| H160  | -6.349907291  | 0.633309029   | 5.093736032  |
| H161  | -7.144948758  | -1.585895335  | 3.390314144  |
| H162  | -6.182561300  | -5.954564136  | 4.115429196  |
| H163  | -5.017076144  | -1.428444258  | 1.425743482  |
| H164  | -7.102804624  | -2.843543376  | 5.845941543  |

|      |              |              |               |
|------|--------------|--------------|---------------|
| H165 | -7.902189282 | -0.241401780 | 5.120301612   |
| H166 | -1.636243075 | -3.710338521 | 3.826422938   |
| H167 | -0.973523757 | -2.877431851 | 2.396705079   |
| H168 | 0.113506424  | -3.373647502 | 3.705164991   |
| H169 | -2.112295229 | -1.258509388 | 3.931954404   |
| H170 | -7.165552261 | -3.836148799 | 7.925220725   |
| H171 | -2.706351848 | 2.004609340  | 4.358418026   |
| H172 | -4.154059844 | 0.233268725  | 8.203837579   |
| H173 | -3.755558795 | 3.686046450  | 8.247183260   |
| H174 | -0.222093847 | -0.480867187 | 2.530062264   |
| H175 | 0.937297402  | -0.886856180 | 3.801062172   |
| H176 | 7.418839713  | 0.961288327  | 7.145696116   |
| H177 | -3.514846539 | 3.578954150  | 4.517074448   |
| H178 | -4.109932533 | 4.531144114  | 6.723297296   |
| H179 | -1.803783637 | 3.410779215  | 4.980936622   |
| H180 | -2.430211500 | 4.414633160  | 7.307539159   |
| H181 | -4.189117054 | 2.063091048  | 6.387967766   |
| H182 | -1.200974809 | 2.100292806  | 7.075981323   |
| H183 | -2.870198813 | 0.079980789  | 5.771891857   |
| H184 | -0.251015700 | 0.416812911  | 4.064792443   |
| H185 | 1.609888314  | 4.317815542  | 0.871587825   |
| H186 | 0.546368798  | 5.111055402  | 2.073835571   |
| H187 | 2.549283389  | 5.371352651  | 2.957489876   |
| H188 | 2.207089272  | 4.842949822  | 5.532867879   |
| H189 | 4.554266274  | 3.909857265  | 3.050621291   |
| H190 | 6.035699080  | 1.941784171  | 3.292592203   |
| H191 | 4.421372005  | 1.212403220  | 7.229809796   |
| H192 | -3.023860951 | -2.388916386 | 6.036940071   |
| H193 | -3.012905119 | -5.546393564 | 6.645871787   |
| H194 | -2.912234985 | -4.904518056 | 8.301854400   |
| H195 | -4.731362419 | -3.959484668 | 6.150564819   |
| H196 | -6.677198987 | -2.302655573 | 8.689143351   |
| H197 | 2.905581248  | 3.157221804  | 6.968431767   |
| H198 | -0.054941050 | -2.240789240 | 5.968293607   |
| H199 | -4.357400980 | 1.362564618  | 10.736348063  |
| H200 | -4.647356287 | -0.357674692 | 10.367075958  |
| H201 | -1.940913995 | -0.548991659 | 10.653301357  |
| H202 | 8.857231894  | -7.868472881 | 7.089433815   |
| H203 | -1.041701255 | -5.781025284 | -4.105253010  |
| H204 | -0.136767931 | -8.689793802 | 1.050432326   |
| H205 | -0.588641482 | -6.383781942 | -8.562869280  |
| H206 | 1.034000754  | -5.663246399 | -8.725028436  |
| H207 | -1.523403975 | -4.361630046 | -7.632070826  |
| H208 | -0.318797297 | 0.918737625  | -10.149533326 |
| H209 | -1.061031306 | -4.368996554 | -10.131081984 |
| H210 | -2.783368777 | -1.800912226 | -3.125539411  |
| H211 | -3.837440313 | -4.379534306 | -1.840144903  |
| H212 | -0.066239055 | -1.203491467 | -8.691972433  |
| H213 | -2.690331833 | -0.242354996 | -9.667074936  |
| H214 | 1.283470893  | -2.710726520 | -9.449652278  |
| H215 | -0.979457749 | -5.395192100 | -2.386916100  |
| H216 | 0.056469507  | -3.613925815 | -7.387689960  |
| H217 | 1.250159177  | -4.137442803 | -10.266926813 |
| H218 | -6.066670117 | -2.828386682 | -4.328748673  |
| H219 | -3.251218951 | -1.775315423 | -1.440761572  |
| H220 | 2.305747078  | -5.592809647 | -7.020691456  |
| H221 | -2.208547846 | -3.813736663 | -1.444692813  |
| H222 | -4.050863460 | 3.246458459  | 2.044285157   |
| H223 | -3.213056395 | 1.048295355  | 0.808120914   |
| H224 | -8.584416716 | 1.652265973  | 1.582738351   |
| H225 | -7.098112579 | 0.807195321  | -0.867798352  |

|      |              |              |              |
|------|--------------|--------------|--------------|
| H226 | -6.599949477 | 4.866960576  | 0.249492029  |
| H227 | -8.117885237 | 9.736139721  | 1.517092164  |
| H228 | -7.571149356 | 6.229692985  | 2.968410426  |
| H229 | -8.725052298 | 6.420912462  | 0.472633331  |
| H230 | -5.882724431 | 7.580947136  | 0.768636197  |
| H231 | -9.308286879 | 10.537730831 | -2.470340102 |
| H232 | -2.836313598 | 4.671233414  | 0.448585784  |
| H233 | -4.140463698 | 4.568510288  | -0.735499058 |
| H234 | -8.940405620 | 11.504496288 | -0.133834577 |
| H235 | -7.587323738 | 6.502309611  | -0.872816576 |
| H236 | -5.510787974 | 2.289163358  | -0.120520306 |
| H237 | -7.395155190 | 0.347998443  | 1.522036196  |
| H238 | -9.319974152 | 2.656227228  | -2.820441825 |
| H239 | -1.330204896 | 1.285392331  | -2.938625077 |
| H240 | -9.791927755 | 0.952984681  | -2.687555666 |
| H241 | 9.145227283  | 1.961602782  | 5.856063776  |
| H242 | 7.791760454  | 2.317207694  | 5.008834121  |
| H243 | 2.680460128  | 5.848074022  | -0.836335887 |
| H244 | -0.106447875 | 6.004620079  | 0.018515767  |
| H245 | 2.644579161  | 8.205031083  | 0.383977585  |
| H246 | -2.306004045 | 3.627522265  | -2.414691023 |
| H247 | -3.498388474 | 4.594341387  | -4.171654672 |
| H248 | -3.316331331 | 5.883813172  | -3.281988999 |
| H249 | -3.790102606 | 1.827157327  | -5.068813269 |
| H250 | -5.432516568 | 1.860477180  | -5.778136364 |
| H251 | 1.776069014  | 12.147856186 | -2.304362480 |
| H252 | 0.523043144  | 13.412972725 | -2.445512285 |
| H253 | 1.266476625  | 10.000103645 | -3.056437239 |
| H254 | -0.376873911 | 9.511772350  | -3.407510024 |
| H255 | -0.179991649 | 9.067747702  | -6.858565255 |
| H256 | -0.096061224 | 4.579779814  | -6.315539950 |
| H257 | -5.726804131 | 9.397407258  | -2.634374570 |
| H258 | -2.170401884 | 8.965251820  | 0.819533288  |
| H259 | -2.381933593 | 7.939480953  | -4.351242886 |
| H260 | 2.822383615  | 4.682992492  | -3.263195087 |
| H261 | 4.158560455  | 6.587446805  | -2.490491810 |
| H262 | 0.339961854  | 4.538284280  | -3.665292639 |
| H263 | -7.552687371 | 0.292029514  | -3.192204979 |
| H264 | 5.814697152  | 9.222358438  | -3.365344313 |
| H265 | -5.121604291 | -0.408012946 | -4.501347200 |
| H266 | 3.033057108  | 5.522654911  | -4.802839046 |
| H267 | -2.179583571 | 7.448767436  | -1.127361067 |
| H268 | -5.602263437 | 3.878726704  | -4.365176466 |
| H269 | 5.115134656  | 9.832853630  | -1.851184289 |
| H270 | 0.435494488  | 7.507104970  | -7.275858174 |
| H271 | -2.114732497 | 9.136377913  | -5.562258027 |
| H272 | -4.433994948 | -3.141251473 | -4.494444243 |
| H273 | -5.524047123 | -2.684564157 | -2.088940926 |
| H274 | -5.645636207 | 11.003276224 | -0.748972343 |
| H275 | -4.752019089 | 1.942287344  | -2.783889756 |
| H276 | 1.726449037  | 7.474665427  | -3.956910388 |
| H277 | 1.096942996  | 5.880520542  | -6.297650538 |
| H278 | 1.376298574  | 3.694124194  | -4.802457909 |
| H279 | -1.450721147 | 5.886169629  | -4.659323504 |
| H280 | 1.398601337  | 9.477141094  | 2.664209146  |
| H281 | 0.853037974  | 10.285372430 | -0.513338732 |
| H282 | 1.289300651  | 13.155715151 | -0.129235905 |
| H283 | 3.028425464  | 9.744181274  | 2.008762136  |
| H284 | -1.333878202 | 11.138851778 | 0.596105284  |
| H285 | 6.508820604  | -3.659167813 | -7.676084124 |
| H286 | 6.158928023  | -5.118290603 | -6.731612897 |

|      |              |               |              |
|------|--------------|---------------|--------------|
| H287 | 8.191976337  | -5.994397887  | -2.429175461 |
| H288 | 7.031500621  | -5.794010770  | -8.834532386 |
| H289 | 5.422443389  | -6.089788922  | -8.929628584 |
| H290 | 6.200227062  | 4.441966848   | 0.824871785  |
| H291 | 6.334096208  | 7.290747978   | 2.047844575  |
| H292 | 6.641617287  | 7.354524302   | -2.234560211 |
| H293 | 4.792182964  | 5.503786552   | 1.157139686  |
| H294 | 7.734308306  | 7.656704966   | 1.283928433  |
| H295 | 6.777083790  | 2.527618609   | -4.984889442 |
| H296 | 7.275069955  | 6.191575200   | -0.505273402 |
| H297 | 3.077380073  | -6.850379182  | 6.279723867  |
| H298 | 5.231113802  | -8.259101714  | 4.614317823  |
| H299 | 5.310743474  | 0.860325247   | -5.761550135 |
| H300 | 3.763169517  | -0.133391006  | 3.927316879  |
| H301 | 2.852377788  | 1.148366755   | -8.261050538 |
| H302 | -0.221293876 | -2.384492661  | -4.329660210 |
| H303 | 2.221846614  | 1.719140888   | -6.717313430 |
| H304 | 2.603405934  | -4.358496349  | 5.367053814  |
| H305 | 3.683656102  | -0.328918748  | -5.774457258 |
| H306 | 2.706730113  | -4.997066871  | 3.723066578  |
| H307 | 3.001079114  | -7.262515146  | 4.551464310  |
| H308 | 5.056061707  | -5.763856239  | 4.178554646  |
| H309 | 4.908263612  | -5.220611053  | 5.858868490  |
| H310 | -3.337205023 | -0.670960330  | -7.453516245 |
| H311 | 3.375073522  | -9.381155828  | 6.684520315  |
| H312 | 2.470818321  | -11.814538902 | 5.035489376  |
| H313 | 1.159284290  | -0.443553312  | -3.650423582 |
| H314 | 3.299340683  | -11.639459173 | 7.828334392  |
| H315 | 1.806124197  | -11.864149207 | 7.194710496  |
| H316 | 4.424518582  | -3.425174871  | 3.184935822  |
| H317 | 0.770995113  | 1.772212337   | -4.673219688 |
| H318 | -1.976814634 | -2.117625353  | -6.082529574 |
| H319 | 6.587386160  | -10.612428220 | 0.923912618  |
| H320 | 6.622053805  | -8.560007959  | -1.852979316 |
| H321 | 5.386027702  | -8.722900427  | 1.899966888  |
| H322 | 6.052173762  | -11.278669595 | -0.360513065 |
| H323 | 7.442986641  | 1.661395387   | -7.795564322 |
| H324 | 5.767105829  | -5.609389604  | 1.457314005  |
| H325 | 1.388584280  | -7.356664545  | 1.765516183  |
| H326 | 4.938990001  | -2.538170106  | -6.445654907 |
| H327 | 2.105757336  | -9.255907733  | 0.220868595  |
| H328 | 4.208743513  | -7.392901690  | -5.919477057 |
| H329 | 3.101582782  | -5.705977043  | -4.369383656 |
| H330 | 3.911884172  | -12.544036821 | 5.755272285  |
| H331 | 4.372819546  | -1.241818759  | 2.727941320  |
| H332 | 7.283985994  | -6.535859253  | 3.066746320  |
| H333 | 6.636489849  | -4.365168325  | 1.774865286  |
| H334 | 7.163085662  | -7.451364699  | 5.275593968  |
| H335 | 2.917700341  | -2.550822484  | 6.318464972  |
| H336 | 2.335612555  | -11.969201166 | -2.512393900 |
| H337 | 3.356540528  | -8.566856547  | -2.488735499 |
| H338 | 4.337456583  | -8.864231236  | -1.041171637 |
| H339 | 1.274750458  | -8.660933070  | -1.245032769 |
| H340 | 2.711153068  | -2.468548215  | -5.503764800 |
| H341 | -0.980790240 | 2.062126410   | -6.447371574 |
| H342 | -3.052933300 | 1.082801364   | -7.557097523 |
| H343 | 1.411545614  | -5.694797993  | 1.090759512  |
| H344 | 7.170110630  | -8.088462047  | 3.041205774  |
| H345 | 5.720668075  | -9.819399634  | 2.948755288  |
| H346 | 2.579434977  | -0.940000258  | 5.810198175  |
| H347 | 6.281272318  | -8.463011341  | -4.849893126 |

|       |              |               |              |
|-------|--------------|---------------|--------------|
| H348  | 6.307670185  | -6.994476087  | -1.091782671 |
| H349  | 2.103667927  | -3.250476256  | -6.995758432 |
| H350  | 6.146291399  | 3.666294038   | -6.199938456 |
| H351  | 5.794406776  | -0.520784350  | 6.059696378  |
| H352  | 6.489390392  | -0.190253464  | 4.454488367  |
| H353  | 9.680289976  | -7.424770935  | -3.539560875 |
| H354  | 8.827436808  | -8.771653226  | -3.170985254 |
| H355  | 9.403498634  | -9.688557174  | 1.285804518  |
| H356  | 8.034633285  | -9.070837457  | -0.435252245 |
| H357  | 11.370946453 | -8.830231160  | -0.414061380 |
| H358  | 9.361581267  | -7.975430289  | 1.765150514  |
| H359  | 8.920986011  | -0.999829536  | 5.289058617  |
| H360  | -2.193765761 | 13.573303798  | 2.542872054  |
| H361  | 7.580035206  | -7.433921633  | 8.257628135  |
| H362  | 7.662564420  | -5.033282414  | 6.927621657  |
| H363  | -3.515821326 | 12.856189856  | -0.096304314 |
| H364  | -3.303748059 | 10.751621279  | 2.147030671  |
| H365  | -4.802520635 | 11.494412814  | 1.561396481  |
| H366  | -4.728990375 | 7.591146497   | -3.611818483 |
| H367  | 2.076957199  | -1.055502541  | -0.017667622 |
| H368  | -0.109609684 | -1.247322119  | -0.468870367 |
| Mo369 | 3.841016886  | -4.716558861  | -1.285622630 |
| N370  | -7.097353257 | -6.346759864  | -2.208059793 |
| N371  | -9.282572691 | -3.588817009  | -0.949142871 |
| N372  | -9.875326049 | -3.807485794  | 1.815604500  |
| N373  | -7.630523889 | -5.154481512  | 2.825647905  |
| N374  | -5.534253944 | -3.255624110  | 2.276695134  |
| N375  | -6.424591401 | -1.135533274  | 3.960238489  |
| N376  | -6.634513351 | -2.328941782  | 6.596078205  |
| N377  | -4.324717334 | -3.973678245  | 7.091234387  |
| N378  | -2.052385844 | -2.621780281  | 6.231367873  |
| N379  | -2.105314407 | 0.353546565   | 6.391733008  |
| N380  | -3.527524074 | 0.612131792   | 8.918109579  |
| N381  | 2.675592429  | -11.343271345 | 7.074739728  |
| N382  | 3.981621791  | -9.336625569  | 5.858569632  |
| N383  | 3.929696326  | -3.345958825  | 4.079346573  |
| N384  | 2.855002953  | -1.883971198  | 5.556766470  |
| N385  | 3.776439077  | -1.087125014  | 3.571780026  |
| N386  | 6.933827619  | -7.488613803  | 6.293401002  |
| N387  | -5.131937842 | -2.434300829  | -4.198762254 |
| N388  | -1.432890381 | -5.293597036  | -3.296105847 |
| N389  | -5.314463745 | 0.136906103   | -3.646268343 |
| N390  | -7.766046219 | 1.280349364   | -3.077871550 |
| N391  | -7.818058164 | 1.286831789   | -0.310189273 |
| N392  | -5.661631909 | 2.806302084   | 0.745155149  |
| N393  | -2.355688731 | 2.808640445   | -1.792841241 |
| N394  | -2.184076326 | 0.713391016   | -1.050568122 |
| N395  | -6.180786321 | 5.497460789   | 0.928885954  |
| N396  | -8.667393297 | 8.674127426   | -1.591315608 |
| N397  | -8.789195987 | 10.528804805  | -0.377931998 |
| N398  | 8.396690061  | 1.543538878   | 5.298290204  |
| N399  | 7.070825950  | 6.894900318   | 1.454363289  |
| N400  | 5.941879154  | 7.911995374   | -1.750965559 |
| N401  | 3.500891168  | 7.254716763   | -2.922834118 |
| N402  | -0.708859899 | 6.278553261   | -5.280564345 |
| N403  | -0.052532776 | 8.092997831   | -6.607662315 |
| N404  | -1.746427433 | 8.342985254   | -5.043773695 |
| N405  | 1.753100249  | 6.314788783   | -0.861963146 |
| N406  | 1.788412535  | 8.552591539   | 0.826437981  |
| N407  | 0.899780077  | 11.131788781  | 0.055992253  |
| N408  | 0.261621932  | 10.212391554  | -3.032588826 |

|      |              |               |               |
|------|--------------|---------------|---------------|
| N409 | -1.646080605 | 12.100915924  | 0.490499111   |
| N410 | 6.117792100  | -5.338395615  | -8.892531928  |
| N411 | 4.168410537  | -3.043815254  | -6.895939989  |
| N412 | 3.210421691  | -0.142728623  | -6.678748186  |
| N413 | 5.334438829  | 1.742283137   | -6.289123233  |
| N414 | 0.713883369  | -3.287033689  | -10.081570379 |
| N415 | -1.033145536 | -1.259425205  | -9.029217416  |
| N416 | 8.729468560  | -7.774209083  | -3.387372382  |
| N417 | 4.683380955  | -6.215935584  | -3.003310198  |
| N418 | 4.563728371  | -7.156715559  | -4.997277104  |
| N419 | 8.800316205  | -8.425590249  | -0.242616577  |
| N420 | 0.411817019  | 1.720192463   | 0.411992384   |
| N421 | 1.276012284  | 1.188539631   | -0.085381554  |
| O422 | -7.281673429 | -4.339787545  | -0.161099426  |
| O423 | -8.698686338 | -1.889803709  | 2.170183154   |
| O424 | -8.129773803 | -4.361284016  | 4.912001481   |
| O425 | -4.558322534 | -4.037983130  | 4.176809472   |
| O426 | -4.246044034 | -0.519054328  | 4.175068608   |
| O427 | -5.917010273 | -0.304714694  | 7.378392130   |
| O428 | -4.679143244 | -3.680435922  | 9.340584212   |
| O429 | -0.672156020 | -4.256359935  | 7.074054452   |
| O430 | 0.028417475  | -0.061512326  | 7.096672207   |
| O431 | -1.818660863 | 1.998483066   | 9.475116488   |
| O432 | -2.674766247 | 0.255516249   | 12.378243252  |
| O433 | 4.854399169  | -10.712781885 | 4.216652059   |
| O434 | 5.316323810  | -7.871854018  | 7.881972367   |
| O435 | 9.540958536  | -5.414414932  | 7.627094869   |
| O436 | -5.552671283 | -0.198606957  | -1.384678896  |
| O437 | -2.992237627 | -4.277084009  | -4.601671399  |
| O438 | -6.925987611 | 3.399426561   | -3.259721681  |
| O439 | -4.780121894 | 3.621593159   | -4.861236297  |
| O440 | -9.876813930 | 2.311861218   | -0.296477022  |
| O441 | -6.587282104 | 2.679942240   | 2.829978155   |
| O442 | -4.577199421 | 5.719244243   | 2.539425982   |
| O443 | -7.013444104 | 8.193916873   | 3.047115071   |
| O444 | 8.480686061  | -1.373526250  | 7.247378565   |
| O445 | 2.832342527  | 4.755423698   | 4.789986833   |
| O446 | 4.758530884  | 8.221226419   | 0.173035112   |
| O447 | 3.062269975  | 9.468680502   | -3.367336554  |
| O448 | 0.038336948  | 7.057656257   | -2.185625387  |
| O449 | -0.212892663 | 7.898555256   | 1.733148814   |
| O450 | 2.529015219  | 5.780379875   | 2.068363117   |
| O451 | 1.759844384  | 12.048896228  | 1.967040114   |
| O452 | -1.117688161 | 14.156521948  | -0.340604736  |
| O453 | -1.438815083 | 11.732787807  | -2.895986198  |
| O454 | -4.082019427 | 14.199095803  | 2.077505438   |
| O455 | -3.918469887 | 7.459523425   | -3.083279430  |
| O456 | 3.536447856  | -4.981151384  | -7.958865326  |
| O457 | 1.877925559  | -1.077035774  | -8.290333900  |
| O458 | 4.220842523  | 3.261381911   | -7.584803543  |
| O459 | 8.749250350  | 2.841997663   | -6.760539953  |
| O460 | -2.725993504 | -2.582356184  | -9.800453885  |
| O461 | -0.381341172 | -6.652788224  | -5.954331179  |
| O462 | 1.728822902  | -6.019758498  | -6.313162686  |
| O463 | -1.436963177 | 2.289571433   | -9.141349811  |
| O464 | 9.923599271  | -6.507853101  | -0.672711981  |
| O465 | 11.940620961 | -8.350957295  | 1.486499025   |
| O466 | -0.727210213 | -6.090764876  | -0.375389172  |
| O467 | -0.732309026 | -8.129665310  | 0.517483840   |
| O468 | 4.280772262  | -11.350241148 | -1.487172258  |
| O469 | 2.241223553  | -11.000250923 | -2.392217130  |

|  |                          |              |               |              |
|--|--------------------------|--------------|---------------|--------------|
|  | O470                     | 4.623797244  | -6.266094390  | 0.181954564  |
|  | O471                     | 3.922653742  | -7.892546930  | 1.575185734  |
|  | O472                     | 2.411622550  | -6.255309494  | -1.237380501 |
|  | O473                     | 7.614610779  | -7.347222001  | 3.533061269  |
|  | O474                     | 6.348128766  | -5.217474458  | 2.158599182  |
|  | O475                     | -2.822207898 | 5.151563361   | -3.706521705 |
|  | O476                     | 6.855334131  | -11.232719799 | 0.198691525  |
|  | O477                     | 6.136639094  | -9.313092109  | 2.203970182  |
|  | S478                     | 4.726274734  | 4.659179134   | -1.105954102 |
|  | S479                     | 3.043230065  | 1.619372793   | -2.608978910 |
|  | S480                     | 2.643895562  | -3.514558048  | -2.928709131 |
|  | S481                     | 3.992573566  | 1.452617896   | 0.890844570  |
|  | S482                     | 0.257278977  | -2.306730408  | -1.232273147 |
|  | S483                     | 5.344503664  | -1.145961473  | -4.328274449 |
|  | S484                     | 3.059636498  | -3.631747150  | 0.696134743  |
|  | S485                     | 6.460136099  | 1.219288291   | -1.578209464 |
|  | S486                     | 6.026546377  | -3.775162053  | -1.541528449 |
|  | S487                     | 6.140532276  | -1.562947841  | 1.418837034  |
|  | <b>6-1</b>               |              |               |              |
|  | Fe1                      | 3.17         |               |              |
|  | Fe2                      | -0.15        |               |              |
|  | Fe3                      | -2.78        |               |              |
|  | Fe4                      | 2.60         |               |              |
|  | Fe5                      | -2.39        |               |              |
|  | Fe6                      | -1.32        |               |              |
|  | Fe7                      | 2.28         |               |              |
|  | S=1                      |              |               |              |
|  | bm2cnx262n2x352bti.car_4 |              |               |              |
|  | C1                       | -2.781377775 | -7.889543054  | -4.281855746 |
|  | C2                       | -1.795631541 | -8.572593244  | -5.235592731 |
|  | C3                       | -5.088753710 | -7.110022536  | -3.953832973 |
|  | C4                       | -5.364115493 | -7.692868410  | -2.569193643 |
|  | C5                       | -5.461344619 | -9.675091502  | -1.146987969 |
|  | C6                       | -4.392286638 | -9.321632964  | -0.106597722 |
|  | C7                       | -2.077701528 | -8.624242704  | 0.283972373  |
|  | C8                       | -2.262552632 | -7.173650380  | 0.740442729  |
|  | C9                       | -2.919105151 | -4.901477835  | 0.151018344  |
|  | C10                      | -4.079936237 | -4.740348120  | 1.144882402  |
|  | C11                      | -6.290976992 | -5.457038503  | 1.853084071  |
|  | C12                      | -6.044719331 | -6.076833719  | 3.234581619  |
|  | C13                      | -5.293909046 | -8.043736343  | 4.484271857  |
|  | C14                      | -4.055181498 | -7.760671444  | 5.342871742  |
|  | C15                      | -1.661281700 | -7.202296429  | 5.364723108  |
|  | C16                      | -1.142360934 | -5.767915710  | 5.488704811  |
|  | C17                      | -1.466884381 | -3.413998869  | 4.781804231  |
|  | C18                      | -2.525926030 | -2.534445510  | 5.470653579  |
|  | C19                      | -1.113923601 | -2.954733606  | 3.340591932  |
|  | C20                      | -0.853266161 | -1.446156574  | 3.259959102  |
|  | C21                      | 0.086940630  | -3.743565531  | 2.804770322  |
|  | C22                      | -4.874019187 | -1.788897437  | 5.535683482  |
|  | C23                      | -5.455832206 | -2.498413967  | 6.775118418  |
|  | C24                      | -5.956049602 | -1.448357060  | 4.482699038  |
|  | C25                      | -7.164423152 | -0.765304015  | 5.134210912  |
|  | C26                      | -5.374846541 | -0.558355712  | 3.376190522  |
|  | C27                      | -6.431744108 | -4.496799931  | 7.744235906  |
|  | C28                      | -5.578316794 | -4.451161199  | 8.995219763  |
|  | C29                      | 7.719637529  | -8.738886701  | 6.624557374  |
|  | C30                      | 7.803442436  | -7.219480988  | 6.489394506  |
|  | C31                      | 6.580296581  | -5.114968980  | 7.042459343  |
|  | C32                      | 6.738262791  | -4.604306063  | 8.487086540  |
|  | C33                      | 5.199476569  | -4.749449023  | 6.469039792  |
|  | C34                      | 4.948167388  | -3.240885345  | 6.429224515  |
|  | C35                      | 3.722122962  | -2.902264610  | 5.585868307  |
|  | C36                      | 2.396005961  | -0.776924544  | 5.554415766  |
|  | C37                      | 7.841239895  | -2.960015141  | 9.929690661  |
|  | C38                      | 7.221673609  | -1.591204899  | 10.108185324 |
|  | C39                      | -1.296140840 | -3.681747619  | -4.563717132 |
|  | C40                      | -2.540828232 | -2.782351999  | -4.492289764 |
|  | C41                      | -0.242716065 | -3.137780900  | -3.578521339 |



|      |               |              |              |
|------|---------------|--------------|--------------|
| C42  | 0.912359993   | -4.107109612 | -3.256394547 |
| C43  | 2.134234988   | -3.994833014 | -4.165286807 |
| C44  | -3.636265619  | -0.856554379 | -5.576538930 |
| C45  | -5.084705891  | -1.283943352 | -5.847741007 |
| C46  | -3.208467895  | 0.245617691  | -6.565986420 |
| C47  | -6.644066891  | -3.176097575 | -5.957726852 |
| C48  | -7.153334031  | -3.440302408 | -4.531895079 |
| C49  | -6.597228992  | -3.556422766 | -2.139156448 |
| C50  | -6.605575235  | -2.318030367 | -1.240847251 |
| C51  | -5.906992652  | 0.002646731  | -0.861648724 |
| C52  | -7.297731331  | 0.620685390  | -0.658313725 |
| C53  | -5.046129991  | 1.094164051  | -1.520871712 |
| C54  | -3.632639277  | 0.683306826  | -1.760144555 |
| C55  | -2.848498809  | -0.330232802 | -1.246947799 |
| C56  | -1.581822448  | 0.751470581  | -2.604249823 |
| C57  | -9.347911700  | 1.288549592  | -1.834219373 |
| C58  | -10.249688886 | 0.872541799  | -0.673281880 |
| C59  | -10.014512044 | 0.936485986  | -3.187417991 |
| C60  | -11.037935969 | 1.909164987  | -3.695114526 |
| C61  | -12.068837104 | 2.555576812  | -3.042274898 |
| C62  | -12.035094597 | 3.124566798  | -5.183655106 |
| C63  | 3.071506544   | 3.212806091  | 8.733694469  |
| C64  | 4.403018587   | 2.628276778  | 9.171773978  |
| C65  | 2.577538272   | 2.359686900  | 7.538510282  |
| C66  | 1.234319429   | 2.809695491  | 7.012370855  |
| C67  | 0.032633906   | 2.301224402  | 7.538126857  |
| C68  | 1.147818521   | 3.767701079  | 5.985822903  |
| C69  | -1.209222550  | 2.729214370  | 7.057915332  |
| C70  | -0.083417827  | 4.212552313  | 5.504626178  |
| C71  | -1.264226235  | 3.688451531  | 6.038065946  |
| C72  | 0.520563388   | 8.689700523  | 2.819308866  |
| C73  | -0.564495417  | 9.253852743  | 1.892544585  |
| C74  | 0.602661141   | 7.162844899  | 2.670620402  |
| C75  | -1.041148102  | 10.598457908 | -0.107161529 |
| C76  | -1.669742509  | 9.627982331  | -1.108762134 |
| C77  | -1.608816748  | 7.354508253  | -2.082940574 |
| C78  | -2.656985256  | 6.469896668  | -1.371648947 |
| C79  | -0.419938157  | 6.558460031  | -2.651148380 |
| C80  | -0.722560625  | 5.424953934  | -3.635102847 |
| C81  | -1.247958884  | 5.822371173  | -5.024447888 |
| C82  | -3.471621434  | 6.859791400  | -5.493332715 |
| C83  | -3.394782978  | 5.356977194  | 0.673464791  |
| C84  | -4.566030176  | 6.177180260  | 1.249017084  |
| C85  | -2.753040802  | 4.564154940  | 1.820579073  |
| C86  | -5.189605102  | 8.254501854  | 2.380491983  |
| C87  | -6.201386933  | 9.218526139  | 1.767797902  |
| C88  | -7.159490457  | 10.206698299 | -0.271802523 |
| C89  | -8.613963554  | 9.734030962  | -0.477854913 |
| C90  | -6.539150903  | 10.669188181 | -1.609070593 |
| C91  | -6.411055479  | 9.519993865  | -2.602041714 |
| C92  | -10.146189407 | 7.820688770  | -0.573656739 |
| C93  | -11.204513694 | 8.351881430  | 0.385381685  |
| C94  | -10.064626422 | 6.274630992  | -0.464832369 |
| C95  | -9.121450160  | 5.681139361  | -1.485399495 |
| C96  | -9.561808789  | 5.431594958  | -2.795017352 |
| C97  | -7.777088937  | 5.420166161  | -1.175672428 |
| C98  | -8.685187239  | 4.958824474  | -3.773057210 |
| C99  | -6.879362366  | 4.967119506  | -2.148091680 |
| C100 | -7.344924876  | 4.749724685  | -3.443488533 |
| C101 | 9.541658843   | 1.708983302  | -4.521161098 |
| C102 | 8.220703649   | 1.140081746  | -5.011336605 |

|       |              |               |              |
|-------|--------------|---------------|--------------|
| C103  | 5.749475741  | 1.330571932   | -4.829091991 |
| C104  | 4.971803162  | 2.427436372   | -5.565499987 |
| C105  | 3.815900602  | 4.575183702   | -5.319600634 |
| C106  | 4.008758732  | 5.930982290   | -4.648282645 |
| C107  | 4.983968993  | 7.250497702   | -2.824973689 |
| C108  | 6.240968677  | 8.004775747   | -3.213821361 |
| C109  | 4.962068285  | -0.769445756  | -8.836991197 |
| C110  | 3.530514426  | -0.385128810  | -9.230126808 |
| C111  | 4.929384872  | -1.592754276  | -7.528491561 |
| C112  | 6.253738163  | -2.346940816  | -7.301338183 |
| C113  | 6.329349397  | -2.866710810  | -5.884088349 |
| C114  | 1.649489659  | 1.142719658   | -8.908229761 |
| C115  | 1.582458629  | 2.649621395   | -9.056159930 |
| C116  | 0.570766956  | 0.531762152   | -7.980762891 |
| C117  | 0.934014167  | 0.743187616   | -6.538510916 |
| C118  | 0.646407745  | 1.953969560   | -5.887983753 |
| C119  | 1.717359769  | -0.216418256  | -5.873232747 |
| C120  | 1.201694648  | 2.223123605   | -4.634085482 |
| C121  | 2.276125195  | 0.058194999   | -4.623190364 |
| C122  | 2.049286974  | 1.298324874   | -4.020734834 |
| C123  | 10.918436555 | -0.364893250  | 1.366164640  |
| C124  | 11.246447365 | -0.354578052  | 2.869095712  |
| C125  | 9.978931697  | -1.521845199  | 0.988791146  |
| C126  | 9.455028036  | -1.513614391  | -0.413963000 |
| C127  | 10.177193313 | -1.662087150  | -1.580664167 |
| C128  | 8.014740361  | -1.662502195  | -2.055143196 |
| C129  | 11.932848668 | -1.559909306  | 4.867529370  |
| C130  | 13.037263855 | -0.581072799  | 5.201012430  |
| C131  | 4.061926531  | -5.559750434  | 0.220328857  |
| C132  | 4.785172566  | -4.850329170  | 1.334646221  |
| C133  | 6.148245570  | -4.211871385  | 0.861755072  |
| C134  | 7.081938370  | -5.324487312  | 0.301603016  |
| C135  | 8.510143441  | -4.826795643  | 0.023715474  |
| C136  | 9.510262600  | -5.924266888  | -0.217230379 |
| C137  | 6.836648916  | -3.636618914  | 2.132277618  |
| C138  | 3.996654852  | 1.735949917   | 0.588027094  |
| Fe139 | 5.603884858  | 1.321480586   | -0.478795449 |
| Fe140 | 1.854189558  | 1.734302575   | 0.397033316  |
| Fe141 | 3.842843554  | 3.025069257   | 2.173641288  |
| Fe142 | 4.004091728  | 3.368585228   | -0.417038571 |
| Fe143 | 2.100696362  | 4.658484475   | 0.985403289  |
| Fe144 | 5.122362337  | 0.825519184   | 2.012172390  |
| Fe145 | 3.537702292  | -0.134308083  | 0.267071759  |
| H146  | -0.228016790 | -8.638206496  | -3.933778515 |
| H147  | -0.112355207 | -7.431881073  | -5.025472422 |
| H148  | -4.283001565 | -8.095002057  | -5.671000357 |
| H149  | -1.983459650 | -8.220296966  | -6.261509439 |
| H150  | -2.047504204 | -9.647980865  | -5.233893575 |
| H151  | -4.804304289 | -6.059747398  | -3.793835455 |
| H152  | -5.002329932 | -9.597045653  | -3.248594492 |
| H153  | -6.023301703 | -7.128823867  | -4.530847036 |
| H154  | -5.468709361 | -10.763039856 | -1.295496347 |
| H155  | -3.010710735 | -9.015242629  | -1.593484474 |
| H156  | -6.427712875 | -9.376310380  | -0.720333708 |
| H157  | -2.036081071 | -4.446890291  | 0.618937923  |
| H158  | -2.738174071 | -6.584036650  | -1.182951457 |
| H159  | -1.122760128 | -8.720109803  | -0.250885070 |
| H160  | -6.564142159 | -4.405974511  | 2.013031265  |
| H161  | -5.201249458 | -6.158863655  | 0.134304233  |
| H162  | -2.034540847 | -9.241951274  | 1.188847630  |
| H163  | -3.142717036 | -4.343381118  | -0.769639748 |

|      |              |              |              |
|------|--------------|--------------|--------------|
| H164 | -5.191579887 | -7.756015581 | 2.372142482  |
| H165 | -7.142422182 | -5.968841956 | 1.383718526  |
| H166 | -0.104680857 | -4.826324054 | 2.802812571  |
| H167 | 0.314094300  | -3.437113027 | 1.772108130  |
| H168 | 0.985306045  | -3.551906552 | 3.413303002  |
| H169 | -1.987765438 | -3.179675556 | 2.707979135  |
| H170 | -5.280417029 | -9.114153852 | 4.229704037  |
| H171 | -4.535722734 | -1.037654387 | 2.852624884  |
| H172 | -5.794137981 | -4.268166080 | 5.721402305  |
| H173 | -7.647907780 | -1.399690121 | 5.891324156  |
| H174 | -0.676185702 | -1.155004229 | 2.214001903  |
| H175 | 0.042082411  | -1.160372720 | 3.829752691  |
| H176 | 2.356762846  | 3.076026638  | 9.568000611  |
| H177 | -6.153452543 | -0.329867387 | 2.634265382  |
| H178 | -7.912043473 | -0.522969814 | 4.365582130  |
| H179 | -5.020480985 | 0.395751952  | 3.799343834  |
| H180 | -6.862690985 | 0.174770117  | 5.622937169  |
| H181 | -6.297741912 | -2.396764050 | 4.029459951  |
| H182 | -4.446163204 | -0.853583740 | 5.925841233  |
| H183 | -3.952813687 | -3.054046375 | 4.061262247  |
| H184 | -1.702122964 | -0.850833174 | 3.629353516  |
| H185 | -1.849817991 | 4.058016817  | 1.440451011  |
| H186 | -3.478494490 | 3.798067792  | 2.135280989  |
| H187 | -2.466642248 | 4.918673764  | 3.733334665  |
| H188 | -3.201549788 | 3.666226078  | 5.920738333  |
| H189 | -0.131154601 | 4.939670534  | 4.693787029  |
| H190 | 2.062822794  | 4.156262950  | 5.532211615  |
| H191 | 0.059991845  | 1.554738166  | 8.336297199  |
| H192 | -2.631995829 | -5.134128798 | 4.249498625  |
| H193 | -0.877877293 | -7.786762007 | 4.858694460  |
| H194 | -1.769661057 | -7.595961048 | 6.383512001  |
| H195 | -2.913453975 | -7.362945782 | 3.653267041  |
| H196 | -6.164491662 | -7.854321570 | 5.124400658  |
| H197 | -2.131706939 | 2.308866067  | 7.467878192  |
| H198 | -0.573718886 | -3.334193887 | 5.415557473  |
| H199 | -7.435988715 | -4.107828599 | 7.977590627  |
| H200 | -6.537278737 | -5.556086592 | 7.460467797  |
| H201 | -4.484104321 | -4.339773780 | 8.811626685  |
| H202 | 8.922403384  | -2.904534421 | 10.125501073 |
| H203 | 4.181298440  | -4.111554448 | -4.129529209 |
| H204 | 4.897056762  | -7.196123413 | 0.811595964  |
| H205 | 6.306695038  | -3.203825582 | -7.988184440 |
| H206 | 7.106212351  | -1.682434569 | -7.504983436 |
| H207 | 4.104361202  | -2.320982369 | -7.554486975 |
| H208 | 2.543300348  | 3.125499975  | -9.363738621 |
| H209 | 5.281925178  | -1.444256362 | -9.645615538 |
| H210 | 0.155826435  | -2.190991819 | -3.974999334 |
| H211 | 0.560670277  | -5.151827319 | -3.321673663 |
| H212 | 3.562684668  | 1.241269830  | -7.940116298 |
| H213 | 1.439820110  | 0.769685647  | -9.931669662 |
| H214 | 5.704452517  | 1.005482015  | -8.055302950 |
| H215 | 3.408808363  | -4.316793273 | -2.557536231 |
| H216 | 4.718906545  | -0.910870336 | -6.690049039 |
| H217 | 6.831246927  | 0.076087090  | -8.813229936 |
| H218 | -1.134338222 | -4.557410584 | -6.430749695 |
| H219 | -0.754227064 | -2.875435490 | -2.642659404 |
| H220 | 7.380109789  | -1.264575645 | -5.422253693 |
| H221 | 1.225391577  | -3.963066655 | -2.212528169 |
| H222 | -5.521277520 | -0.238902474 | 0.139692832  |
| H223 | -3.133247615 | -1.083870984 | -0.517141700 |
| H224 | -7.613258928 | -3.969366535 | -2.113654707 |

|      |               |              |              |
|------|---------------|--------------|--------------|
| H225 | -5.247489917  | -3.156468089 | -3.746464276 |
| H226 | -7.777406406  | 0.021161930  | -2.556742507 |
| H227 | -12.389704340 | 2.554060879  | -2.006728608 |
| H228 | -10.120703295 | -0.194085020 | -0.366623853 |
| H229 | -10.432969337 | -0.083710398 | -3.128958675 |
| H230 | -9.169767486  | 2.374333414  | -1.772935102 |
| H231 | -12.329352431 | 3.615043892  | -6.108641590 |
| H232 | -5.088128942  | 1.974829195  | -0.857927002 |
| H233 | -5.520788401  | 1.395761347  | -2.470941551 |
| H234 | -13.485867799 | 3.937052719  | -3.853514844 |
| H235 | -9.218512664  | 0.900668236  | -3.947503365 |
| H236 | -5.268312480  | -1.294233396 | -2.435620095 |
| H237 | -5.934611720  | -4.307678462 | -1.682932590 |
| H238 | -7.366067161  | -2.502466944 | -6.436280673 |
| H239 | -0.733118126  | 1.102275273  | -3.188094730 |
| H240 | -6.658063469  | -4.127057420 | -6.506938055 |
| H241 | 3.396062474   | 5.188349315  | 9.164340200  |
| H242 | 2.433747662   | 4.953181961  | 7.864847485  |
| H243 | -1.487860698  | 6.323693361  | 0.342026968  |
| H244 | -3.843634499  | 4.636023619  | -0.024588395 |
| H245 | -3.363140146  | 7.829194313  | 1.413600949  |
| H246 | -3.094366829  | 2.167972028  | -3.217075697 |
| H247 | -3.992608806  | 2.658923050  | -5.305110299 |
| H248 | -4.942003165  | 3.524929637  | -4.381602737 |
| H249 | -2.195849628  | 0.585351984  | -6.310885775 |
| H250 | -3.198016157  | -0.160379649 | -7.591984431 |
| H251 | -5.564410439  | 11.133739162 | -1.399192431 |
| H252 | -7.205763584  | 11.426135392 | -2.042394109 |
| H253 | -4.341768655  | 9.325773664  | -2.244877516 |
| H254 | -5.092993314  | 8.089858190  | -3.228160693 |
| H255 | -3.559881403  | 8.749415695  | -6.276678055 |
| H256 | -0.889206192  | 5.102474987  | -5.775446210 |
| H257 | -9.045134514  | 4.754216540  | -4.784132762 |
| H258 | -7.403689991  | 5.559586034  | -0.156864405 |
| H259 | -5.241052679  | 5.954740439  | -4.947664925 |
| H260 | 0.145570548   | 6.121604904  | -1.812766684 |
| H261 | -0.328779870  | 8.163283402  | -0.574051684 |
| H262 | -1.391148333  | 4.674787496  | -3.184901741 |
| H263 | -4.502617061  | -3.213875432 | -6.062180122 |
| H264 | -0.512207139  | 11.371698205 | -0.680909677 |
| H265 | -1.942956316  | -2.080272801 | -6.264344934 |
| H266 | 0.250761605   | 7.287763630  | -3.135935272 |
| H267 | -5.824482950  | 4.825611932  | -1.907223545 |
| H268 | -4.994273813  | 0.992641181  | -6.365800495 |
| H269 | -1.873388586  | 11.083423398 | 0.421640079  |
| H270 | -2.018032136  | 7.985857751  | -6.414956063 |
| H271 | -5.401823743  | 7.378030975  | -5.909672068 |
| H272 | 0.251918143   | -3.784519302 | -5.914333143 |
| H273 | -1.631795687  | -4.666386069 | -4.186097449 |
| H274 | -10.608861682 | 5.602519426  | -3.058615134 |
| H275 | -3.664693011  | -0.406132763 | -4.569606373 |
| H276 | -2.159973298  | 7.847122233  | -2.894753822 |
| H277 | -0.842729587  | 6.801390847  | -5.310366633 |
| H278 | 0.235289842   | 4.912388098  | -3.790886559 |
| H279 | -3.195076396  | 4.951826062  | -4.860132616 |
| H280 | -5.765603545  | 7.550087713  | 2.998845413  |
| H281 | -5.630283402  | 8.689045811  | -0.133138765 |
| H282 | -7.236363854  | 11.082602728 | 0.389063660  |
| H283 | -4.556557340  | 8.850712949  | 3.052107184  |
| H284 | -8.062283752  | 7.812345484  | -0.062334295 |
| H285 | 9.420940619   | 2.773682931  | -4.272865573 |

|      |              |               |              |
|------|--------------|---------------|--------------|
| H286 | 9.759575739  | 1.182788196   | -3.568128598 |
| H287 | 10.402030866 | 0.587627720   | 1.180600860  |
| H288 | 11.488163206 | 1.738968782   | -5.130950346 |
| H289 | 10.585517690 | 0.578148216   | -5.853929349 |
| H290 | 1.428941366  | 6.803563502   | 3.297587651  |
| H291 | -0.703033604 | 8.751559966   | 4.451267243  |
| H292 | 0.876150077  | 10.135704110  | 0.719211194  |
| H293 | -0.340925989 | 6.711760293   | 3.009740383  |
| H294 | 0.314500955  | 10.029157382  | 4.360495677  |
| H295 | 4.991214354  | 7.056920124   | -1.741722033 |
| H296 | 1.494038117  | 9.124201721   | 2.542109228  |
| H297 | 4.420554842  | -5.253265475  | 7.065273044  |
| H298 | 7.359513334  | -4.679382126  | 6.404629241  |
| H299 | 5.235460258  | 5.168116426   | -3.150625116 |
| H300 | 1.532345155  | 1.047111312   | 5.229695916  |
| H301 | 4.088543560  | 4.693924017   | -6.377033171 |
| H302 | 2.887223114  | -0.693097367  | -4.117149186 |
| H303 | 2.733123476  | 4.366473451   | -5.299956012 |
| H304 | 2.811737772  | -3.334803099  | 6.019609071  |
| H305 | 4.660300621  | 3.320427158   | -3.762634441 |
| H306 | 3.832355589  | -3.336988852  | 4.577671888  |
| H307 | 5.156631111  | -5.163992897  | 5.448685862  |
| H308 | 5.817325158  | -2.727886592  | 5.991794604  |
| H309 | 4.811240902  | -2.839428882  | 7.445783006  |
| H310 | 0.506090866  | -0.541541515  | -8.210917368 |
| H311 | 6.084253421  | -7.163184028  | 7.506632899  |
| H312 | 7.505271757  | -9.122247938  | 5.615513011  |
| H313 | 2.491108928  | 1.549782123   | -3.057619915 |
| H314 | 7.048329601  | -9.292951724  | 8.491250872  |
| H315 | 6.320798334  | -10.104662311 | 7.268177624  |
| H316 | 4.298221593  | -0.978316006  | 4.918828859  |
| H317 | 0.986766847  | 3.156764834   | -4.115107850 |
| H318 | 1.899249156  | -1.185104527  | -6.344671579 |
| H319 | 11.015239402 | -4.807776825  | 3.580715135  |
| H320 | 10.513904813 | -2.476120970  | 1.143151698  |
| H321 | 8.649376469  | -4.282301432  | 3.976076136  |
| H322 | 11.476227611 | -5.305010479  | 2.196216364  |
| H323 | 6.732322172  | 7.651473409   | -4.152829175 |
| H324 | 7.082366980  | -1.528456615  | 3.754217688  |
| H325 | 4.979489655  | -5.526739580  | 2.179747346  |
| H326 | 7.216507747  | 2.485760824   | -3.838846647 |
| H327 | 7.120851337  | -6.141665106  | 1.039409388  |
| H328 | 9.452470412  | -1.906333992  | -3.582840597 |
| H329 | 7.106108347  | -1.730829696  | -2.638833563 |
| H330 | 8.735182330  | -9.085083118  | 6.880923460  |
| H331 | 3.001554427  | 0.783037252   | 4.345064806  |
| H332 | 8.238162079  | -1.804448023  | 5.824598669  |
| H333 | 7.000227367  | -0.129627493  | 4.426423589  |
| H334 | 8.044404884  | -3.135447672  | 7.794964070  |
| H335 | 1.569201082  | -1.979640219  | 7.005961285  |
| H336 | 9.875106157  | -7.408619265  | -1.332616961 |
| H337 | 8.496235086  | -4.170872123  | -0.859269032 |
| H338 | 8.893681103  | -4.243147184  | 0.868353695  |
| H339 | 6.641203697  | -5.714652086  | -0.627615986 |
| H340 | 5.251865597  | 1.063503282   | -3.884377627 |
| H341 | 0.014655425  | 2.695153264   | -6.384350068 |
| H342 | -0.389109849 | 1.001381261   | -8.243172663 |
| H343 | 4.147989876  | -4.023162817  | 1.672869704  |
| H344 | 9.161884364  | -3.052266015  | 5.750981328  |
| H345 | 9.231513212  | -5.203599832  | 5.080864549  |
| H346 | 0.490598050  | -0.801891135  | 6.347425659  |

|       |               |              |              |
|-------|---------------|--------------|--------------|
| H347  | 11.245324593  | -1.719871146 | -1.752378133 |
| H348  | 9.126153328   | -1.530094545 | 1.677912628  |
| H349  | 5.791153449   | 0.453629483  | -5.478860908 |
| H350  | 4.126645907   | 7.908835964  | -3.041887486 |
| H351  | 2.519995023   | 1.315030192  | 7.879590047  |
| H352  | 3.331909156   | 2.413481441  | 6.736746554  |
| H353  | 12.703383178  | 0.455299211  | 0.778423997  |
| H354  | 12.722956832  | -1.180297818 | 0.801533453  |
| H355  | 12.309773005  | -2.568708345 | 5.097026500  |
| H356  | 11.559427654  | -2.423600712 | 2.955288528  |
| H357  | 13.725222189  | -0.341888159 | 4.354414925  |
| H358  | 11.060247804  | -1.373773050 | 5.512993925  |
| H359  | 5.273369569   | 2.979599118  | 8.566187655  |
| H360  | -10.809660422 | 8.770751846  | 1.341104376  |
| H361  | 7.385483683   | -3.618471844 | 10.690169207 |
| H362  | 6.291713641   | -1.411181430 | 9.514366300  |
| H363  | -10.460197672 | 8.091088389  | -1.594968738 |
| H364  | -9.754161401  | 6.001244560  | 0.556001237  |
| H365  | -11.082588681 | 5.886583607  | -0.612975361 |
| H366  | -6.910204507  | 4.117754550  | -5.232073286 |
| H367  | 2.246953416   | 0.315618460  | 1.274728392  |
| H368  | 0.811685889   | -0.735894504 | -0.414552319 |
| Mo369 | 6.057415684   | -1.216137838 | 0.486600598  |
| N370  | -0.385850817  | -8.412035338 | -4.919407858 |
| N371  | -4.070705013  | -7.819191743 | -4.715583365 |
| N372  | -5.256915791  | -9.038144757 | -2.437881103 |
| N373  | -3.142855119  | -9.098650446 | -0.586436644 |
| N374  | -2.654958906  | -6.287348828 | -0.209205465 |
| N375  | -5.151753829  | -5.547348221 | 0.953266895  |
| N376  | -5.425468058  | -7.285374457 | 3.250033884  |
| N377  | -2.929308607  | -7.374679569 | 4.677607025  |
| N378  | -1.850417059  | -4.820116819 | 4.821400605  |
| N379  | -3.780405668  | -2.558389101 | 4.938236323  |
| N380  | -5.812057170  | -3.800655033 | 6.630746146  |
| N381  | 6.670917973   | -9.187534173 | 7.547280644  |
| N382  | 6.760369824   | -6.559176226 | 7.024957878  |
| N383  | 3.550511006   | -1.451828580 | 5.431680890  |
| N384  | 1.386658427   | -1.278310360 | 6.296022525  |
| N385  | 2.227079761   | 0.379958218  | 4.899210194  |
| N386  | 7.572461278   | -3.544393333 | 8.630043612  |
| N387  | -0.781149016  | -3.735088278 | -5.937638729 |
| N388  | 3.330033704   | -4.161795986 | -3.563516892 |
| N389  | -2.678876619  | -1.945089179 | -5.553584814 |
| N390  | -5.314606118  | -2.601506355 | -6.034383696 |
| N391  | -6.233561921  | -3.349953102 | -3.530666780 |
| N392  | -5.964886304  | -1.197557384 | -1.697103197 |
| N393  | -2.805032636  | 1.368832109  | -2.632951365 |
| N394  | -1.580090869  | -0.284255103 | -1.777305568 |
| N395  | -8.099495135  | 0.552376922  | -1.750795814 |
| N396  | -11.027396065 | 2.273462321  | -5.032752270 |
| N397  | -12.689093269 | 3.324302882  | -4.004494930 |
| N398  | 3.276167741   | 4.606204171  | 8.331909378  |
| N399  | 0.262812206   | 9.014860828  | 4.229695793  |
| N400  | -0.124149344  | 10.012298740 | 0.849590129  |
| N401  | -1.091439949  | 8.413162537  | -1.219617843 |
| N402  | -2.712442165  | 5.841062119  | -5.105436622 |
| N403  | -2.941628503  | 7.994533751  | -5.996652724 |
| N404  | -4.812482168  | 6.811274664  | -5.306016491 |
| N405  | -2.422455989  | 6.156078156  | -0.067802261 |
| N406  | -4.332340789  | 7.503776679  | 1.474876061  |
| N407  | -6.305557690  | 9.233611685  | 0.405523431  |

|      |               |              |               |
|------|---------------|--------------|---------------|
| N408 | -5.198203290  | 8.906788780  | -2.627368829  |
| N409 | -8.850487480  | 8.414169633  | -0.286026434  |
| N410 | 10.573449354  | 1.555527369  | -5.549148732  |
| N411 | 7.114709894   | 1.753358120  | -4.546266517  |
| N412 | 4.564292139   | 3.451671833  | -4.785461272  |
| N413 | 4.815631757   | 6.008437337  | -3.556752479  |
| N414 | 5.860067584   | 0.390382299  | -8.862775697  |
| N415 | 3.009935059   | 0.720417215  | -8.628137878  |
| N416 | 12.145711216  | -0.372052891 | 0.549004945   |
| N417 | 8.097212962   | -1.504171256 | -0.735483980  |
| N418 | 9.252827008   | -1.754010195 | -2.597798830  |
| N419 | 11.591465124  | -1.534794627 | 3.454733316   |
| N420 | -1.074749844  | 1.584276330  | 0.741141335   |
| N421 | 0.038617086   | 1.626920559  | 0.573498467   |
| O422 | -2.446508856  | -7.472458940 | -3.157348891  |
| O423 | -5.687753841  | -6.952495301 | -1.626669858  |
| O424 | -4.672911453  | -9.272670911 | 1.102061786   |
| O425 | -2.070043076  | -6.837389909 | 1.919932562   |
| O426 | -4.035405001  | -3.901314110 | 2.059446329   |
| O427 | -6.436359431  | -5.507845048 | 4.268207070   |
| O428 | -4.106865037  | -7.935248895 | 6.567808880   |
| O429 | -0.122881786  | -5.542564777 | 6.157078360   |
| O430 | -2.231976567  | -1.848924265 | 6.462921348   |
| O431 | -5.601225100  | -1.901655942 | 7.855174476   |
| O432 | -6.029697001  | -4.595016037 | 10.121398594  |
| O433 | 8.777619128   | -6.705862016 | 5.898486888   |
| O434 | 6.125329113   | -5.143749616 | 9.424014761   |
| O435 | 7.674155444   | -0.737758373 | 10.853902161  |
| O436 | -3.350614977  | -2.826959964 | -3.543391708  |
| O437 | 2.036318464   | -3.782440433 | -5.394364383  |
| O438 | -5.990230146  | -0.423424738 | -5.841471101  |
| O439 | -4.087629286  | 1.378292078  | -6.492304509  |
| O440 | -8.343989088  | -3.734087158 | -4.361258648  |
| O441 | -7.197136126  | -2.345761554 | -0.156870970  |
| O442 | -7.608428421  | 1.224947503  | 0.374339240   |
| O443 | -11.084151025 | 1.594032916  | -0.153334792  |
| O444 | 4.540226812   | 1.825662280  | 10.083476905  |
| O445 | -2.455955342  | 4.143702460  | 5.511801319   |
| O446 | -1.775819213  | 9.043550367  | 2.084831406   |
| O447 | -2.645554915  | 10.010104572 | -1.786003608  |
| O448 | -3.671105494  | 6.098208957  | -1.984461056  |
| O449 | -5.637155337  | 5.618668036  | 1.522843523   |
| O450 | -2.435935790  | 5.440852834  | 2.905806337   |
| O451 | -6.893655694  | 9.929816395  | 2.506141183   |
| O452 | -9.502783415  | 10.538997106 | -0.792169792  |
| O453 | -7.378776563  | 9.124774117  | -3.270584680  |
| O454 | -12.401776276 | 8.290238508  | 0.156756556   |
| O455 | -6.420501003  | 4.344184768  | -4.417988805  |
| O456 | 8.199215754   | 0.140173640  | -5.771979974  |
| O457 | 4.764266441   | 2.371819116  | -6.795610365  |
| O458 | 3.403628729   | 6.909653667  | -5.114133790  |
| O459 | 6.688378074   | 8.939396194  | -2.569498961  |
| O460 | 2.877720407   | -1.072977106 | -10.033328560 |
| O461 | 5.790237495   | -3.901763693 | -5.506570226  |
| O462 | 6.995723395   | -2.094210631 | -4.998442176  |
| O463 | 0.565945000   | 3.314310803  | -8.916009605  |
| O464 | 11.268255671  | 0.707617428  | 3.517981750   |
| O465 | 13.227889665  | -0.133387307 | 6.322224595   |
| O466 | 3.307438195   | -5.030272301 | -0.580587282  |
| O467 | 4.293804482   | -6.905053499 | 0.101001296   |
| O468 | 10.546335349  | -6.095402989 | 0.420335444   |

|                            |             |                          |              |               |              |
|----------------------------|-------------|--------------------------|--------------|---------------|--------------|
|                            | O469        | 9.165519896              | -6.736008855 | -1.249640390  |              |
|                            | O470        | 7.079740710              | -2.361594473 | 2.101668220   |              |
|                            | O471        | 7.157453568              | -4.390712233 | 3.074293963   |              |
|                            | O472        | 5.901700276              | -3.220665278 | -0.074475520  |              |
|                            | O473        | 8.852907529              | -2.346788490 | 6.379068202   |              |
|                            | O474        | 6.992200689              | -1.083211167 | 4.634251995   |              |
|                            | O475        | -3.997182386             | 3.334480604  | -4.575863484  |              |
|                            | O476        | 11.829704414             | -4.942149979 | 3.033986313   |              |
|                            | O477        | 9.449192926              | -4.385125864 | 4.562238959   |              |
|                            | S478        | 0.878131212              | 6.625115547  | 0.918516754   |              |
|                            | S479        | 1.834339719              | 3.572734456  | -1.075427564  |              |
|                            | S480        | 4.926507795              | -0.569040376 | -1.477122607  |              |
|                            | S481        | 1.634825211              | 3.016740311  | 2.428310357   |              |
|                            | S482        | 1.767042420              | -0.077394965 | -1.119778223  |              |
|                            | S483        | 5.785296017              | 3.126837849  | -1.753674003  |              |
|                            | S484        | 4.240499686              | -1.243480611 | 2.030935589   |              |
|                            | S485        | 4.364342876              | 4.951299654  | 1.204921155   |              |
|                            | S486        | 7.149476307              | 0.832800874  | 1.087780106   |              |
|                            | S487        | 4.967696402              | 2.054631770  | 3.822128401   |              |
| <b>6<sup>-1</sup>u Fe1</b> | <b>2.85</b> | bm2cnx262n2x352buh.car_3 |              |               |              |
| Fe2                        | -0.96       | C1                       | -8.160623346 | -4.543708850  | 1.071964460  |
| Fe3                        | -2.19       | C2                       | -8.363639405 | -5.851645299  | 0.299028300  |
| Fe4                        | 2.87        | C3                       | -9.146339735 | -2.387262374  | 1.718199488  |
| Fe5                        | -2.35       | C4                       | -8.861287782 | -2.405844481  | 3.217861671  |
| Fe6                        | -1.11       | C5                       | -9.132447166 | -3.565694924  | 5.351199886  |
| Fe7                        | 2.29        | C6                       | -7.666759374 | -3.851494117  | 5.694473000  |
| <b>S=1</b>                 |             | C7                       | -5.554283393 | -4.836526744  | 4.947816401  |
|                            |             | C8                       | -4.700355606 | -3.589155876  | 4.698357759  |
|                            |             | C9                       | -4.316277290 | -1.589476401  | 3.362342430  |
|                            |             | C10                      | -4.484361916 | -0.534971901  | 4.465894446  |
|                            |             | C11                      | -5.947127391 | 0.524093306   | 6.092511420  |
|                            |             | C12                      | -5.326670970 | 0.128843787   | 7.439931330  |
|                            |             | C13                      | -5.114634884 | -1.597056387  | 9.162518333  |
|                            |             | C14                      | -3.667983642 | -2.077536907  | 9.326260940  |
|                            |             | C15                      | -1.789293178 | -3.298270973  | 8.315126556  |
|                            |             | C16                      | -0.653571376 | -2.567664090  | 7.595608486  |
|                            |             | C17                      | -0.081625468 | -0.752505085  | 6.005248057  |
|                            |             | C18                      | 0.027241234  | 0.704302627   | 6.490835310  |
|                            |             | C19                      | -0.402388361 | -0.876655015  | 4.492158244  |
|                            |             | C20                      | 0.482262316  | 0.031983025   | 3.632921104  |
|                            |             | C21                      | -0.287927505 | -2.336528612  | 4.035561822  |
|                            |             | C22                      | -1.147692901 | 2.822348153   | 6.961507775  |
|                            |             | C23                      | -1.219180219 | 2.889267779   | 8.500179621  |
|                            |             | C24                      | -2.275546245 | 3.630884693   | 6.275863219  |
|                            |             | C25                      | -2.388080801 | 5.037833770   | 6.874949221  |
|                            |             | C26                      | -2.036482687 | 3.712320184   | 4.762477106  |
|                            |             | C27                      | -2.332676934 | 2.214254458   | 10.547602860 |
|                            |             | C28                      | -1.040676802 | 1.933743506   | 11.287239875 |
|                            |             | C29                      | 4.427832531  | -10.485256099 | 7.085764580  |
|                            |             | C30                      | 5.169451417  | -9.456087072  | 6.235052142  |
|                            |             | C31                      | 5.712362508  | -7.024652297  | 6.093769180  |
|                            |             | C32                      | 6.856692050  | -6.529041978  | 6.996845315  |
|                            |             | C33                      | 4.650833324  | -5.933119732  | 5.874758841  |
|                            |             | C34                      | 5.214957749  | -4.660303127  | 5.239361621  |
|                            |             | C35                      | 4.097211522  | -3.735000655  | 4.766134576  |
|                            |             | C36                      | 4.238763926  | -1.304781360  | 4.177505317  |
|                            |             | C37                      | 9.205611287  | -5.830584541  | 7.061464995  |
|                            |             | C38                      | 9.564613934  | -4.393382775  | 6.746167771  |
|                            |             | C39                      | -5.211860628 | -2.525449739  | -1.619027087 |
|                            |             | C40                      | -5.564135362 | -1.031485422  | -1.576390190 |



|      |              |              |              |
|------|--------------|--------------|--------------|
| C41  | -3.692759051 | -2.678563195 | -1.401295816 |
| C42  | -3.225820649 | -4.106058395 | -1.051797039 |
| C43  | -2.857493555 | -4.984452893 | -2.243591327 |
| C44  | -5.916591122 | 0.943161429  | -3.012189947 |
| C45  | -7.249975150 | 1.559557062  | -2.569799712 |
| C46  | -5.613072536 | 1.314976367  | -4.477543440 |
| C47  | -9.310518843 | 1.217317945  | -1.286604066 |
| C48  | -9.005072221 | 1.573795135  | 0.177314000  |
| C49  | -7.376150488 | 1.483875281  | 2.017161226  |
| C50  | -6.276727441 | 2.535404336  | 2.182791252  |
| C51  | -4.439878007 | 3.820701960  | 1.179911252  |
| C52  | -4.948353719 | 5.234471824  | 1.500121524  |
| C53  | -3.679119248 | 3.931607450  | -0.152036637 |
| C54  | -3.061980801 | 2.651823683  | -0.608989834 |
| C55  | -2.762145396 | 1.465408197  | 0.030794557  |
| C56  | -2.109428192 | 1.209905612  | -2.001324244 |
| C57  | -6.635024288 | 6.907664790  | 0.870074311  |
| C58  | -6.830090147 | 7.395807178  | 2.304366364  |
| C59  | -7.988256775 | 6.883928849  | 0.118475823  |
| C60  | -8.476341276 | 8.198185238  | -0.416533435 |
| C61  | -8.494316613 | 9.456358406  | 0.155987867  |
| C62  | -9.358581131 | 9.523955305  | -1.883495444 |
| C63  | 8.452322859  | 1.654111164  | 4.675110653  |
| C64  | 9.283375401  | 0.403076384  | 4.897814273  |
| C65  | 7.034360148  | 1.181709570  | 4.269465316  |
| C66  | 6.068305961  | 2.323684164  | 4.057118263  |
| C67  | 5.291852326  | 2.832024998  | 5.116332233  |
| C68  | 5.924307573  | 2.920912170  | 2.792476697  |
| C69  | 4.396434032  | 3.888986242  | 4.920884444  |
| C70  | 5.044614426  | 3.984918837  | 2.584510366  |
| C71  | 4.274799280  | 4.463709704  | 3.650018015  |
| C72  | 6.239706429  | 6.396413228  | -1.919753773 |
| C73  | 5.288715478  | 7.388483975  | -2.601083630 |
| C74  | 5.447187389  | 5.218030731  | -1.335453793 |
| C75  | 4.552947755  | 8.380289650  | -4.724349014 |
| C76  | 3.095628704  | 7.945991549  | -4.888405198 |
| C77  | 1.467200265  | 6.097897082  | -4.663165180 |
| C78  | 0.709856963  | 6.267714426  | -3.326633997 |
| C79  | 1.548602618  | 4.634188425  | -5.132588879 |
| C80  | 0.232802775  | 3.868807429  | -5.303960050 |
| C81  | -0.673131651 | 4.286015975  | -6.475139855 |
| C82  | -1.903476270 | 6.454915736  | -6.647381905 |
| C83  | 0.763952278  | 6.270606576  | -0.886511568 |
| C84  | 0.712145139  | 7.739788033  | -0.422555284 |
| C85  | 1.404383598  | 5.435763862  | 0.230404834  |
| C86  | 1.954392790  | 9.842141483  | -0.264421624 |
| C87  | 1.421886585  | 11.125656395 | -0.898278315 |
| C88  | 0.144291325  | 12.164108741 | -2.726433518 |
| C89  | -1.182987566 | 12.761721457 | -2.213668254 |
| C90  | 0.066140763  | 11.876102872 | -4.242146769 |
| C91  | -0.971777294 | 10.805672242 | -4.563399149 |
| C92  | -3.214964320 | 12.382263146 | -0.887792813 |
| C93  | -3.157663536 | 13.626765084 | -0.009010436 |
| C94  | -3.868945758 | 11.212873028 | -0.104457554 |
| C95  | -4.094069043 | 9.997443333  | -0.974547844 |
| C96  | -5.237404979 | 9.906658029  | -1.782378691 |
| C97  | -3.145576959 | 8.963814583  | -1.047442946 |
| C98  | -5.422620914 | 8.832110312  | -2.656642922 |
| C99  | -3.300746366 | 7.894255964  | -1.935194637 |
| C100 | -4.437487005 | 7.846686575  | -2.739182692 |
| C101 | 4.790817981  | -5.822170024 | -7.589088646 |

|       |               |               |              |
|-------|---------------|---------------|--------------|
| C102  | 3.352827184   | -5.432849374  | -7.287448002 |
| C103  | 1.890867621   | -3.613271247  | -6.432931637 |
| C104  | 1.510248043   | -2.409921980  | -7.301606784 |
| C105  | 1.927210219   | -0.028308600  | -7.719579070 |
| C106  | 3.109218453   | 0.923434599   | -7.880778467 |
| C107  | 5.427195211   | 1.502236020   | -7.327075422 |
| C108  | 6.441539652   | 1.148038693   | -8.397123655 |
| C109  | -1.881816505  | -5.248847155  | -8.506963311 |
| C110  | -2.861849112  | -4.070057871  | -8.563187584 |
| C111  | -1.605899944  | -5.621180675  | -7.031305894 |
| C112  | -0.963886586  | -7.016201658  | -6.910548312 |
| C113  | -0.406989288  | -7.227692983  | -5.521072096 |
| C114  | -3.179146160  | -1.648692995  | -8.414966894 |
| C115  | -2.550358523  | -0.532804914  | -9.225301196 |
| C116  | -3.675001548  | -1.221065110  | -7.012366044 |
| C117  | -2.539060633  | -1.111195514  | -6.029787437 |
| C118  | -1.755974558  | 0.051767311   | -5.947476061 |
| C119  | -2.176780214  | -2.223469104  | -5.252101070 |
| C120  | -0.617104006  | 0.078207766   | -5.137036924 |
| C121  | -1.038383025  | -2.193999328  | -4.443731246 |
| C122  | -0.245331245  | -1.045132289  | -4.395491622 |
| C123  | 7.913973765   | -7.354508120  | -2.203607845 |
| C124  | 8.959960236   | -7.322554414  | -1.075143327 |
| C125  | 6.497506536   | -7.624230201  | -1.668986566 |
| C126  | 5.384582483   | -7.503588767  | -2.664178901 |
| C127  | 5.154329504   | -8.302172073  | -3.767420535 |
| C128  | 3.452338767   | -6.910976632  | -3.503888768 |
| C129  | 9.897070499   | -8.343050007  | 0.928747892  |
| C130  | 11.315366665  | -8.329993209  | 0.403219580  |
| C131  | 0.073773878   | -6.753395060  | 1.481813059  |
| C132  | 1.523973754   | -6.502930208  | 1.810529152  |
| C133  | 2.504653461   | -7.031467405  | 0.694627834  |
| C134  | 2.283260330   | -8.556245259  | 0.484751730  |
| C135  | 3.330995441   | -9.200015619  | -0.439583854 |
| C136  | 3.305257468   | -10.703930162 | -0.428925252 |
| C137  | 3.945908146   | -6.851939111  | 1.254381692  |
| C138  | 3.868202662   | -1.317966327  | -1.613092422 |
| Fe139 | 4.154602715   | -2.844557931  | -2.839393894 |
| Fe140 | 2.703952403   | 0.237160434   | -1.071336093 |
| Fe141 | 5.262517747   | -0.073998557  | -0.876695334 |
| Fe142 | 4.219039808   | -0.283921981  | -3.265799178 |
| Fe143 | 4.368797795   | 2.120996367   | -2.043294668 |
| Fe144 | 4.908128967   | -2.526423485  | -0.376956241 |
| Fe145 | 2.362934658   | -2.429500993  | -0.961572514 |
| H146  | -6.637608641  | -6.752179803  | 0.903673835  |
| H147  | -6.547056410  | -6.118310955  | -0.598085484 |
| H148  | -10.042850702 | -3.916588643  | 0.525169280  |
| H149  | -8.873009867  | -5.632197007  | -0.652347834 |
| H150  | -9.070810837  | -6.461797891  | 0.887882784  |
| H151  | -8.347984364  | -1.788038696  | 1.257430330  |
| H152  | -9.934578758  | -4.142635340  | 3.439707741  |
| H153  | -10.101442912 | -1.870775091  | 1.553578566  |
| H154  | -9.749884401  | -4.387840885  | 5.737329411  |
| H155  | -7.403383739  | -4.783646369  | 3.884963877  |
| H156  | -9.413549854  | -2.644189746  | 5.877089170  |
| H157  | -3.239727330  | -1.782426962  | 3.272396321  |
| H158  | -5.768679103  | -3.136613094  | 2.984894706  |
| H159  | -5.253642494  | -5.629525585  | 4.249744147  |
| H160  | -5.527773656  | 1.499176897   | 5.815298502  |
| H161  | -6.495789999  | -0.989611851  | 4.664834774  |
| H162  | -5.338315025  | -5.172189232  | 5.968775591  |

|      |              |              |               |
|------|--------------|--------------|---------------|
| H163 | -4.668598442 | -1.179958126 | 2.404060382   |
| H164 | -6.075847562 | -1.794315417 | 7.265734912   |
| H165 | -7.032240755 | 0.632754048  | 6.223735235   |
| H166 | -0.964918448 | -2.992554551 | 4.600802919   |
| H167 | -0.539261337 | -2.423565067 | 2.967106947   |
| H168 | 0.741783341  | -2.708045814 | 4.162964799   |
| H169 | -1.447547917 | -0.553848181 | 4.357262888   |
| H170 | -5.772298046 | -2.426133855 | 9.462123105   |
| H171 | -2.022867087 | 2.720769986  | 4.288900711   |
| H172 | -2.890091796 | 1.643895836  | 8.571028920   |
| H173 | -2.613701268 | 5.021406698  | 7.951380882   |
| H174 | 0.159644598  | -0.013979942 | 2.582520420   |
| H175 | 1.534452674  | -0.287344990 | 3.658942657   |
| H176 | 8.370702525  | 2.175160919  | 5.649101951   |
| H177 | -2.829570969 | 4.306137151  | 4.285538190   |
| H178 | -3.189165085 | 5.596445241  | 6.370116779   |
| H179 | -1.073372725 | 4.206134119  | 4.555032549   |
| H180 | -1.447263881 | 5.593850379  | 6.735741960   |
| H181 | -3.229222021 | 3.101698366  | 6.454482365   |
| H182 | -0.178716302 | 3.278380942  | 6.710471475   |
| H183 | -1.971059400 | 1.049552306  | 6.067730373   |
| H184 | 0.435896109  | 1.085790489  | 3.947063293   |
| H185 | 1.525757503  | 4.398496007  | -0.127301591  |
| H186 | 0.705112933  | 5.434615972  | 1.080549169   |
| H187 | 2.819453038  | 5.796002851  | 1.550269452   |
| H188 | 2.903885328  | 5.728132055  | 4.188176156   |
| H189 | 4.927001030  | 4.423660260  | 1.592413642   |
| H190 | 6.494787250  | 2.533579718  | 1.944453919   |
| H191 | 5.381348056  | 2.392286848  | 6.113234275   |
| H192 | -2.017201649 | -1.323547638 | 6.733940970   |
| H193 | -1.832129156 | -4.312568520 | 7.890888977   |
| H194 | -1.502520430 | -3.384697651 | 9.371390867   |
| H195 | -3.657629801 | -2.862367388 | 7.400225638   |
| H196 | -5.252185881 | -0.774913808 | 9.876537369   |
| H197 | 3.789221559  | 4.256562935  | 5.752458371   |
| H198 | 0.905001080  | -1.192010861 | 6.201583647   |
| H199 | -2.731679908 | 3.187124954  | 10.879625399  |
| H200 | -3.050880225 | 1.434889579  | 10.848586250  |
| H201 | -0.310345915 | 1.293063466  | 10.740342583  |
| H202 | 10.073026495 | -6.477961042 | 6.862497763   |
| H203 | -1.511285253 | -6.418714626 | -2.825655725  |
| H204 | 0.187162499  | -8.370579063 | 2.528110081   |
| H205 | -1.725826960 | -7.785470745 | -7.098373326  |
| H206 | -0.163199281 | -7.131295569 | -7.655918881  |
| H207 | -2.543526334 | -5.610618675 | -6.454226480  |
| H208 | -1.838689687 | -0.876407238 | -10.012138918 |
| H209 | -2.447952710 | -6.077941673 | -8.958303322  |
| H210 | -3.165476080 | -2.314708843 | -2.295642767  |
| H211 | -4.013948158 | -4.636113476 | -0.487405775  |
| H212 | -1.321235123 | -2.709283054 | -8.273550011  |
| H213 | -4.075267639 | -1.935271408 | -9.002464327  |
| H214 | -0.061895626 | -4.341441432 | -8.929095050  |
| H215 | -1.250745266 | -5.785048764 | -1.201272435  |
| H216 | -0.956695646 | -4.852508489 | -6.583596746  |
| H217 | -0.188512618 | -5.888428560 | -9.474604597  |
| H218 | -6.566306833 | -3.539937187 | -2.807400150  |
| H219 | -3.395410831 | -2.005096082 | -0.586255133  |
| H220 | 1.354048417  | -6.678944526 | -6.213156068  |
| H221 | -2.357921977 | -4.042704163 | -0.380266983  |
| H222 | -3.757242484 | 3.534741786  | 1.993379865   |
| H223 | -2.937945774 | 1.205998486  | 1.073155821   |

|      |               |              |              |
|------|---------------|--------------|--------------|
| H224 | -8.249795686  | 1.855305874  | 2.566950564  |
| H225 | -7.150581603  | 0.630889732  | 0.072826632  |
| H226 | -6.625630525  | 4.813757207  | 0.407461024  |
| H227 | -8.150929778  | 9.829099833  | 1.114116865  |
| H228 | -7.138848050  | 6.588636477  | 3.012924797  |
| H229 | -8.748727538  | 6.411944940  | 0.765761645  |
| H230 | -5.927166423  | 7.581268100  | 0.361172991  |
| H231 | -9.818339859  | 9.937447549  | -2.777549605 |
| H232 | -2.911999119  | 4.712386520  | -0.018887382 |
| H233 | -4.372862279  | 4.307375289  | -0.923612686 |
| H234 | -9.207288902  | 11.284664898 | -0.694848521 |
| H235 | -7.869859737  | 6.219412694  | -0.751624341 |
| H236 | -5.536477274  | 2.221769356  | 0.280390220  |
| H237 | -7.047860664  | 0.562515409  | 2.521589428  |
| H238 | -9.701818666  | 2.127016202  | -1.759294169 |
| H239 | -1.683120478  | 0.813719738  | -2.919563361 |
| H240 | -10.108707375 | 0.463381438  | -1.297916753 |
| H241 | 9.900085655   | 2.918338244  | 3.967273486  |
| H242 | 8.419407993   | 3.203171567  | 3.339562200  |
| H243 | 2.352853275   | 5.644627687  | -2.213875827 |
| H244 | -0.282671022  | 5.949634856  | -0.990523897 |
| H245 | 2.439619365   | 8.161443748  | -1.446071685 |
| H246 | -2.752155181  | 3.161771863  | -2.671014541 |
| H247 | -4.246662196  | 3.794082922  | -4.324165486 |
| H248 | -3.942257811  | 5.206766056  | -3.686805255 |
| H249 | -4.620803717  | 0.929813166  | -4.748244118 |
| H250 | -6.364522531  | 0.853711164  | -5.141863773 |
| H251 | 1.068383394   | 11.589620135 | -4.592209288 |
| H252 | -0.232646291  | 12.806981057 | -4.741797690 |
| H253 | 0.511956943   | 9.331245134  | -4.832408513 |
| H254 | -1.152215608  | 8.788824565  | -4.843634882 |
| H255 | -1.431500181  | 7.769713138  | -8.146520944 |
| H256 | -1.198381931  | 3.403015532  | -6.867575765 |
| H257 | -6.325839265  | 8.768348678  | -3.268731850 |
| H258 | -2.263627924  | 8.972662238  | -0.400334639 |
| H259 | -3.240815223  | 7.066569232  | -5.204324552 |
| H260 | 2.168239361   | 4.072567036  | -4.415015179 |
| H261 | 3.560715051   | 6.055051388  | -4.229517408 |
| H262 | -0.348727362  | 3.866137160  | -4.369485483 |
| H263 | -7.963756037  | -0.267780952 | -2.049359658 |
| H264 | 4.985358673   | 8.501729478  | -5.726891512 |
| H265 | -5.757508304  | -1.180907800 | -3.559398160 |
| H266 | 2.093763925   | 4.630726268  | -6.091357388 |
| H267 | -2.526990518  | 7.130848960  | -2.026363404 |
| H268 | -6.331844086  | 3.079567233  | -4.080000598 |
| H269 | 4.530576466   | 9.369191415  | -4.245736600 |
| H270 | -0.858216114  | 6.158861412  | -8.396803932 |
| H271 | -3.172648980  | 8.053719469  | -6.615737534 |
| H272 | -4.967250414  | -3.850778755 | -3.173643285 |
| H273 | -5.721286741  | -2.967965687 | -0.741745115 |
| H274 | -6.002281599  | 10.684866927 | -1.731134410 |
| H275 | -5.161273555  | 1.440719825  | -2.378825886 |
| H276 | 0.901165195   | 6.700942009  | -5.385691536 |
| H277 | -0.063505159  | 4.681344510  | -7.297819208 |
| H278 | 0.520090811   | 2.823710603  | -5.481568911 |
| H279 | -2.330806674  | 4.984844698  | -5.315254718 |
| H280 | 1.549845029   | 9.810944157  | 0.758118476  |
| H281 | 0.482366207   | 10.060584839 | -2.381031790 |
| H282 | 0.889508817   | 12.957044544 | -2.569265242 |
| H283 | 3.044891072   | 9.956454457  | -0.192598991 |
| H284 | -1.518508313  | 11.085913453 | -1.096972558 |

|      |              |               |              |
|------|--------------|---------------|--------------|
| H285 | 5.369416254  | -4.930154582  | -7.869257980 |
| H286 | 5.211602064  | -6.184262103  | -6.627366029 |
| H287 | 7.935753775  | -6.350289198  | -2.650594435 |
| H288 | 5.772157553  | -7.213319873  | -8.710239254 |
| H289 | 4.190933833  | -7.563402767  | -8.456044458 |
| H290 | 6.161666009  | 4.514277908   | -0.891639466 |
| H291 | 6.357085768  | 7.520571111   | -0.221508283 |
| H292 | 6.059998343  | 6.888006521   | -4.443209607 |
| H293 | 4.759341448  | 5.583463134   | -0.560386673 |
| H294 | 7.620179590  | 7.751373882   | -1.235535888 |
| H295 | 5.926880740  | 1.521398866   | -6.346303500 |
| H296 | 6.952044171  | 6.007048793   | -2.663510052 |
| H297 | 4.173226032  | -5.700381979  | 6.840964427  |
| H298 | 6.115333672  | -7.337432095  | 5.122949009  |
| H299 | 4.371755395  | -0.229476411  | -6.696313762 |
| H300 | 4.392356318  | 0.554804963   | 3.348270341  |
| H301 | 1.571498129  | -0.284745814  | -8.725702241 |
| H302 | -0.770552248 | -3.059379604  | -3.834598034 |
| H303 | 1.123614521  | 0.554939308   | -7.241526840 |
| H304 | 3.493190764  | -3.380202208  | 5.611009526  |
| H305 | 2.717092638  | -1.268078986  | -6.125500487 |
| H306 | 3.413072843  | -4.285183415  | 4.098602883  |
| H307 | 3.878679206  | -6.368286487  | 5.219836026  |
| H308 | 5.837098590  | -4.920574087  | 4.370023460  |
| H309 | 5.857079591  | -4.120016438  | 5.952938160  |
| H310 | -4.403265642 | -1.972840327  | -6.672648090 |
| H311 | 4.609800242  | -8.106133002  | 7.599140735  |
| H312 | 3.540748316  | -10.777909702 | 6.503735380  |
| H313 | 0.636911018  | -1.012142345  | -3.754550635 |
| H314 | 4.721050448  | -10.145034973 | 9.095821881  |
| H315 | 3.158900120  | -10.449233628 | 8.706526983  |
| H316 | 5.089303420  | -2.808623610  | 3.139808120  |
| H317 | -0.013566273 | 0.982584079   | -5.062990066 |
| H318 | -2.796905804 | -3.123236522  | -5.275616747 |
| H319 | 6.947727539  | -10.295619505 | 1.688670793  |
| H320 | 6.467105003  | -8.645781745  | -1.249471310 |
| H321 | 5.847034588  | -8.264417376  | 2.517033414  |
| H322 | 6.250773105  | -11.193128035 | 0.646892100  |
| H323 | 6.106430719  | 0.378770287   | -9.135264309 |
| H324 | 6.034374998  | -5.245291166  | 1.544875453  |
| H325 | 1.803720324  | -6.959053397  | 2.771962635  |
| H326 | 3.994900468  | -3.598052071  | -6.641719110 |
| H327 | 2.320992716  | -9.046786164  | 1.470208997  |
| H328 | 3.458049097  | -8.319279381  | -5.076169312 |
| H329 | 2.490734770  | -6.442774884  | -3.672424697 |
| H330 | 5.079537799  | -11.374898499 | 7.135582473  |
| H331 | 4.806569710  | -0.748443295  | 2.272205991  |
| H332 | 7.808599828  | -5.903637743  | 3.010010646  |
| H333 | 7.057403367  | -4.080451148  | 1.460711495  |
| H334 | 8.093815969  | -6.439879283  | 5.323201762  |
| H335 | 3.859611505  | -1.407251630  | 6.196087232  |
| H336 | 2.184790974  | -12.189012565 | -0.770606473 |
| H337 | 3.160681943  | -8.855721135  | -1.470224612 |
| H338 | 4.346428339  | -8.908209249  | -0.148361756 |
| H339 | 1.281108805  | -8.711414636  | 0.059353211  |
| H340 | 1.939292320  | -3.328084516  | -5.371280602 |
| H341 | -2.038833389 | 0.926353502   | -6.538625771 |
| H342 | -4.203214002 | -0.262455992  | -7.132414159 |
| H343 | 1.669693755  | -5.416604932  | 1.868008469  |
| H344 | 7.768626597  | -7.440702795  | 3.240344708  |
| H345 | 6.367615233  | -9.160711828  | 3.673885561  |

|       |              |              |              |
|-------|--------------|--------------|--------------|
| H346  | 3.357412360  | 0.062577705  | 5.446020650  |
| H347  | 5.744772299  | -9.094887766 | -4.211792428 |
| H348  | 6.295437268  | -6.939709804 | -0.836109657 |
| H349  | 1.126594624  | -4.381318184 | -6.567079359 |
| H350  | 5.063275340  | 2.520479338  | -7.538125404 |
| H351  | 6.668241961  | 0.521052702  | 5.069511313  |
| H352  | 7.119842892  | 0.585175115  | 3.347397718  |
| H353  | 9.202162632  | -8.041060387 | -3.644001386 |
| H354  | 8.428860740  | -9.243815303 | -2.848719846 |
| H355  | 9.761009765  | -9.289128145 | 1.476132746  |
| H356  | 8.164835651  | -9.006770293 | -0.116981546 |
| H357  | 11.441363628 | -8.756910551 | -0.620836008 |
| H358  | 9.755565887  | -7.518166594 | 1.645518705  |
| H359  | 9.750987506  | -0.005977688 | 3.969190709  |
| H360  | -2.161876096 | 13.837275402 | 0.448231246  |
| H361  | 8.986168106  | -5.877371974 | 8.142764454  |
| H362  | 8.709430307  | -3.751167872 | 6.423841353  |
| H363  | -3.844444279 | 12.627895757 | -1.759201948 |
| H364  | -3.233334489 | 10.956545173 | 0.757704231  |
| H365  | -4.825192758 | 11.582574480 | 0.293245535  |
| H366  | -5.431529866 | 6.826761763  | -4.068277366 |
| H367  | 2.117111318  | -1.059770031 | -0.125347521 |
| H368  | -0.171627640 | -1.196101645 | -0.412313117 |
| Mo369 | 3.714429847  | -4.857836688 | -1.013886945 |
| N370  | -7.165473255 | -6.630038980 | 0.035743243  |
| N371  | -9.233974370 | -3.704732438 | 1.104346249  |
| N372  | -9.382674809 | -3.439026774 | 3.924219109  |
| N373  | -6.982363732 | -4.603364193 | 4.795645764  |
| N374  | -5.038341505 | -2.826172130 | 3.627495758  |
| N375  | -5.713088135 | -0.441829118 | 5.030654474  |
| N376  | -5.511032982 | -1.157750014 | 7.833853325  |
| N377  | -3.104017979 | -2.684994434 | 8.243761631  |
| N378  | -1.020981521 | -1.512667373 | 6.822548676  |
| N379  | -1.122061664 | 1.437971877  | 6.483748152  |
| N380  | -2.172289528 | 2.136750224  | 9.107331219  |
| N381  | 4.002221403  | -9.967999484 | 8.390946409  |
| N382  | 5.101446749  | -8.196318261 | 6.703264741  |
| N383  | 4.621470872  | -2.582316930 | 4.021214455  |
| N384  | 3.689200750  | -0.891967564 | 5.339097171  |
| N385  | 4.359757027  | -0.444752514 | 3.156911751  |
| N386  | 8.027719052  | -6.293584966 | 6.353177928  |
| N387  | -5.640409742 | -3.115310840 | -2.894163341 |
| N388  | -1.797161744 | -5.798774905 | -2.063429757 |
| N389  | -5.811095493 | -0.486662160 | -2.797275633 |
| N390  | -8.174174739 | 0.727558415  | -2.044068400 |
| N391  | -7.791543662 | 1.182627610  | 0.657977261  |
| N392  | -5.540306381 | 2.861227035  | 1.074478753  |
| N393  | -2.636935932 | 2.471948550  | -1.914017857 |
| N394  | -2.175063030 | 0.574670263  | -0.840041834 |
| N395  | -6.122332908 | 5.549105886  | 0.897823659  |
| N396  | -9.019839653 | 8.254818277  | -1.690179789 |
| N397  | -9.055252888 | 10.284423884 | -0.793024031 |
| N398  | 9.061835658  | 2.453132850  | 3.609961419  |
| N399  | 7.011041205  | 7.029469667  | -0.839843506 |
| N400  | 5.390790409  | 7.479400100  | -3.957605290 |
| N401  | 2.818262806  | 6.650872151  | -4.618899408 |
| N402  | -1.694727767 | 5.266432068  | -6.091893856 |
| N403  | -1.259787190 | 6.844251501  | -7.766736945 |
| N404  | -2.719674964 | 7.349468188  | -6.038155695 |
| N405  | 1.417829348  | 6.082214572  | -2.178317656 |
| N406  | 1.660387832  | 8.580945662  | -0.930376362 |

|      |              |              |              |
|------|--------------|--------------|--------------|
| N407 | 0.601138794  | 10.993091358 | -1.982160351 |
| N408 | -0.483261027 | 9.543744498  | -4.693480563 |
| N409 | -1.885011207 | 12.002968414 | -1.338172084 |
| N410 | 4.837398574  | -6.800838471 | -8.678138836 |
| N411 | 3.172339730  | -4.172602407 | -6.842824407 |
| N412 | 2.157122536  | -1.264849023 | -6.994145090 |
| N413 | 4.289564284  | 0.601238051  | -7.289394103 |
| N414 | -0.707549272 | -5.015980072 | -9.356500256 |
| N415 | -2.327383655 | -2.823779589 | -8.426454421 |
| N416 | 8.293670490  | -8.313971676 | -3.258302318 |
| N417 | 4.306382326  | -6.629420679 | -2.520688292 |
| N418 | 3.937453084  | -7.909453299 | -4.279185723 |
| N419 | 8.915017151  | -8.316537619 | -0.144187023 |
| N420 | 0.506706517  | 1.739609831  | 0.216209126  |
| N421 | 1.282665263  | 1.131737775  | -0.329254585 |
| O422 | -7.106640014 | -4.278230397 | 1.678990278  |
| O423 | -8.196266772 | -1.502315736 | 3.749267900  |
| O424 | -7.166658511 | -3.438284976 | 6.753278852  |
| O425 | -3.759180275 | -3.289091587 | 5.450609661  |
| O426 | -3.541566917 | 0.199391604  | 4.803795469  |
| O427 | -4.727591180 | 0.966454593  | 8.137108281  |
| O428 | -3.091419250 | -1.939514869 | 10.413388439 |
| O429 | 0.511978472  | -2.972261325 | 7.722680925  |
| O430 | 1.117810967  | 1.167954368  | 6.860356834  |
| O431 | -0.439048983 | 3.602867119  | 9.152890642  |
| O432 | -0.827621805 | 2.315981669  | 12.428398246 |
| O433 | 5.750375499  | -9.821674462 | 5.190585961  |
| O434 | 6.680359295  | -6.363371453 | 8.215995440  |
| O435 | 10.694838048 | -3.944970648 | 6.848438273  |
| O436 | -5.625873561 | -0.385126648 | -0.510247907 |
| O437 | -3.506986183 | -4.975800258 | -3.313734863 |
| O438 | -7.416714386 | 2.794273582  | -2.662947755 |
| O439 | -5.600595077 | 2.738244990  | -4.659195373 |
| O440 | -9.859517367 | 2.173337786  | 0.843526229  |
| O441 | -6.092847351 | 3.071449087  | 3.279499426  |
| O442 | -4.281222293 | 6.046262345  | 2.150781005  |
| O443 | -6.719645279 | 8.556022707  | 2.663928155  |
| O444 | 9.422670864  | -0.148060222 | 5.979759869  |
| O445 | 3.404092958  | 5.500480009  | 3.382879106  |
| O446 | 4.475875553  | 8.078991377  | -1.959791053 |
| O447 | 2.255182026  | 8.777733102  | -5.283263322 |
| O448 | -0.490990928 | 6.580999451  | -3.337158411 |
| O449 | -0.136520934 | 8.094949410  | 0.406358231  |
| O450 | 2.662849674  | 6.003617613  | 0.606367491  |
| O451 | 1.721718148  | 12.222121130 | -0.409105262 |
| O452 | -1.558137870 | 13.881509728 | -2.588825903 |
| O453 | -2.183422836 | 11.067968289 | -4.621332372 |
| O454 | -4.133609885 | 14.323817377 | 0.217185617  |
| O455 | -4.548493883 | 6.786786414  | -3.652853620 |
| O456 | 2.422136714  | -6.265014047 | -7.422502079 |
| O457 | 0.687050335  | -2.509441960 | -8.234951922 |
| O458 | 2.939534356  | 1.968822475  | -8.528846342 |
| O459 | 7.545439909  | 1.663741129  | -8.465399745 |
| O460 | -4.083435329 | -4.255805032 | -8.692645686 |
| O461 | -1.084527637 | -7.578886847 | -4.561663388 |
| O462 | 0.906252841  | -6.958659895 | -5.355497044 |
| O463 | -2.818672620 | 0.652063419  | -9.089337519 |
| O464 | 9.867662533  | -6.471186658 | -1.054059036 |
| O465 | 12.275823872 | -7.957065581 | 1.060508430  |
| O466 | -0.630107147 | -6.028365825 | 0.798560776  |
| O467 | -0.478253135 | -7.901243903 | 1.989282212  |

|                       |                      |              |               |              |
|-----------------------|----------------------|--------------|---------------|--------------|
|                       | O468                 | 4.247458574  | -11.432441433 | -0.128428701 |
|                       | O469                 | 2.102915603  | -11.211838014 | -0.804699148 |
|                       | O470                 | 4.718195836  | -6.078042580  | 0.553182776  |
|                       | O471                 | 4.305701548  | -7.455655239  | 2.286388648  |
|                       | O472                 | 2.321544937  | -6.314693214  | -0.476921185 |
|                       | O473                 | 8.255158785  | -6.622615827  | 3.525332465  |
|                       | O474                 | 6.688231393  | -4.733117013  | 2.085161905  |
|                       | O475                 | -3.511177381 | 4.402874803   | -4.050145626 |
|                       | O476                 | 7.129197235  | -11.025532237 | 1.045004493  |
|                       | O477                 | 6.645265203  | -8.791530093  | 2.794386337  |
|                       | S478                 | 4.428150827  | 4.341182633   | -2.611119064 |
|                       | S479                 | 2.542794324  | 1.243281255   | -3.114556089 |
|                       | S480                 | 2.241025565  | -3.976629870  | -2.615192743 |
|                       | S481                 | 4.096060219  | 1.535842783   | 0.088062088  |
|                       | S482                 | 0.160407597  | -2.373141804  | -1.008782242 |
|                       | S483                 | 4.565167746  | -1.870125374  | -4.794982654 |
|                       | S484                 | 3.250637825  | -3.377948554  | 0.820637066  |
|                       | S485                 | 6.150940268  | 0.830589102   | -2.675638372 |
|                       | S486                 | 5.806245149  | -3.983232285  | -1.789484205 |
|                       | S487                 | 6.377758603  | -1.252870315  | 0.632045488  |
| <b>7</b>              | bm2cnx2b2n2x35.car_3 |              |               |              |
| Fe( 139) 0.549 -2.448 | C1                   | -8.153713199 | -4.594153450  | -1.217307118 |
| Fe( 140) 0.425 -0.183 | C2                   | -8.186181065 | -5.763203596  | -2.208708917 |
| Fe( 141) 0.537 -2.496 | C3                   | -9.277327498 | -2.553448369  | -0.439257663 |
| Fe( 142) 0.580 2.942  | C4                   | -9.275363691 | -2.799251003  | 1.067675816  |
| Fe( 143) 0.597 3.138  | C5                   | -9.900261573 | -4.261558476  | 2.920056709  |
| Fe( 144) 0.505 2.249  | C6                   | -8.514716791 | -4.598556103  | 3.480582965  |
| Fe( 145) 0.470 0.194  | C7                   | -6.276969001 | -5.468383020  | 3.000371470  |
| S=2                   | C8                   | -5.422839519 | -4.200978237  | 3.096863922  |
|                       | C9                   | -4.859136305 | -2.025633104  | 2.151770622  |
|                       | C10                  | -5.238571933 | -1.140653543  | 3.348201947  |
|                       | C11                  | -6.983532077 | -0.337393512  | 4.837856035  |
|                       | C12                  | -6.613252074 | -0.939286973  | 6.201542679  |
|                       | C13                  | -6.719474271 | -2.906630369  | 7.656926740  |
|                       | C14                  | -5.336469069 | -3.458687604  | 8.021460566  |
|                       | C15                  | -3.273201206 | -4.527084913  | 7.214731166  |
|                       | C16                  | -2.032854761 | -3.702018139  | 6.863291461  |
|                       | C17                  | -1.211087371 | -1.645644101  | 5.741234325  |
|                       | C18                  | -1.237507889 | -0.286955128  | 6.466267404  |
|                       | C19                  | -1.247624498 | -1.529683882  | 4.194489933  |
|                       | C20                  | -0.255108968 | -0.487863502  | 3.671568181  |
|                       | C21                  | -0.999853592 | -2.896524838  | 3.546017439  |
|                       | C22                  | -2.500055534 | 1.760738584   | 6.990371909  |
|                       | C23                  | -2.855048075 | 1.600015118   | 8.482308986  |
|                       | C24                  | -3.490219815 | 2.681469321   | 6.238344157  |
|                       | C25                  | -3.721712375 | 3.989194514   | 7.006377268  |
|                       | C26                  | -2.986849430 | 2.977113801   | 4.819593716  |
|                       | C27                  | -4.318508675 | 0.645172404   | 10.167285736 |
|                       | C28                  | -3.180017598 | 0.215841219   | 11.070950075 |
|                       | C29                  | 3.195179416  | -11.500628438 | 6.190671716  |
|                       | C30                  | 4.043973030  | -10.358487103 | 5.630853042  |
|                       | C31                  | 4.548787543  | -7.929858273  | 5.934044374  |
|                       | C32                  | 5.482023082  | -7.588927665  | 7.111356166  |
|                       | C33                  | 3.531186484  | -6.805601719  | 5.669991569  |
|                       | C34                  | 4.182669684  | -5.462067548  | 5.331395192  |
|                       | C35                  | 3.154180779  | -4.469933682  | 4.790969786  |
|                       | C36                  | 3.368244125  | -1.983008585  | 4.612787888  |
|                       | C37                  | 7.764559878  | -6.970907073  | 7.753958997  |
|                       | C38                  | 8.177628768  | -5.514561531  | 7.776354265  |
|                       | C39                  | -4.791119791 | -2.187043102  | -2.910341227 |



|      |              |              |              |
|------|--------------|--------------|--------------|
| C40  | -5.116733740 | -0.694386641 | -2.737493709 |
| C41  | -3.335517966 | -2.403270486 | -2.434900245 |
| C42  | -2.899582206 | -3.869358576 | -2.230837932 |
| C43  | -2.287490228 | -4.536126712 | -3.461240380 |
| C44  | -5.271326688 | 1.442450076  | -3.932599557 |
| C45  | -6.675806711 | 1.996957176  | -3.653530092 |
| C46  | -4.701000865 | 2.040640372  | -5.233469444 |
| C47  | -8.932749256 | 1.486220387  | -2.842487821 |
| C48  | -8.915374114 | 1.618136188  | -1.311178490 |
| C49  | -7.666938837 | 1.215280779  | 0.769219573  |
| C50  | -6.611386042 | 2.196699852  | 1.281340936  |
| C51  | -4.650389553 | 3.593527143  | 0.822041491  |
| C52  | -5.232981116 | 4.961738647  | 1.258467780  |
| C53  | -3.652586938 | 3.919690702  | -0.300919163 |
| C54  | -2.836986169 | 2.800012433  | -0.864160948 |
| C55  | -2.411850990 | 1.585951492  | -0.383963995 |
| C56  | -1.467734468 | 1.883078218  | -2.372079667 |
| C57  | -6.837486978 | 6.729383656  | 0.612150369  |
| C58  | -7.345253189 | 6.995285013  | 2.027513311  |
| C59  | -7.989372393 | 6.841316333  | -0.413618526 |
| C60  | -8.381390556 | 8.228780394  | -0.829923195 |
| C61  | -8.527159675 | 9.390362548  | -0.095882930 |
| C62  | -8.987981809 | 9.763789692  | -2.230919825 |
| C63  | 7.329606015  | 0.861215234  | 6.417940149  |
| C64  | 8.122192260  | -0.412598760 | 6.644640124  |
| C65  | 6.021684383  | 0.456878412  | 5.689359591  |
| C66  | 5.095759250  | 1.627853738  | 5.461557436  |
| C67  | 4.143072084  | 2.004612712  | 6.427603667  |
| C68  | 5.171501596  | 2.389913043  | 4.282346278  |
| C69  | 3.291037354  | 3.095356330  | 6.221773304  |
| C70  | 4.336494394  | 3.487822062  | 4.066861739  |
| C71  | 3.392847040  | 3.837329350  | 5.037903587  |
| C72  | 6.374992119  | 6.568054505  | 0.283428363  |
| C73  | 5.556872897  | 7.661348301  | -0.414098010 |
| C74  | 5.506448026  | 5.320786813  | 0.503680529  |
| C75  | 5.218794468  | 8.965379385  | -2.467460845 |
| C76  | 3.839015472  | 8.554283829  | -2.986576516 |
| C77  | 2.238163741  | 6.704399932  | -3.335787346 |
| C78  | 1.240226785  | 6.669076568  | -2.156850506 |
| C79  | 2.437973378  | 5.327392841  | -3.994240510 |
| C80  | 1.190319666  | 4.613478972  | -4.523928266 |
| C81  | 0.507965994  | 5.221970116  | -5.761940882 |
| C82  | -0.737517401 | 7.384072385  | -5.866222834 |
| C83  | 0.843117732  | 6.300196701  | 0.219794440  |
| C84  | 0.650708087  | 7.678620783  | 0.880581255  |
| C85  | 1.295689471  | 5.307984059  | 1.300951213  |
| C86  | 1.770462352  | 9.729921094  | 1.606623613  |
| C87  | 1.340000693  | 11.097058111 | 1.082543475  |
| C88  | 0.439494137  | 12.417128173 | -0.787907386 |
| C89  | -0.973312380 | 12.946314362 | -0.457823277 |
| C90  | 0.667519775  | 12.358137961 | -2.313831344 |
| C91  | -0.271473078 | 11.364113104 | -2.987885710 |
| C92  | -3.206797658 | 12.394513625 | 0.397343358  |
| C93  | -3.338160852 | 13.493453430 | 1.445146693  |
| C94  | -3.973286887 | 11.127166500 | 0.863570511  |
| C95  | -4.006774372 | 10.058712244 | -0.205769755 |
| C96  | -4.977764784 | 10.103477166 | -1.219022103 |
| C97  | -3.038968051 | 9.041777411  | -0.258543797 |
| C98  | -4.973164996 | 9.179526699  | -2.267299282 |
| C99  | -3.001453731 | 8.124439429  | -1.314618858 |
| C100 | -3.968952259 | 8.210973221  | -2.313188711 |

|       |               |               |              |
|-------|---------------|---------------|--------------|
| C101  | 6.269011973   | -4.641350921  | -7.312569041 |
| C102  | 4.792613784   | -4.288997290  | -7.242149114 |
| C103  | 3.140334161   | -2.630074804  | -6.423488298 |
| C104  | 2.887864815   | -1.293995570  | -7.129838175 |
| C105  | 3.350169188   | 1.110854113   | -7.092582035 |
| C106  | 4.515563136   | 2.071319681   | -6.872736008 |
| C107  | 6.656772016   | 2.560026162   | -5.783444916 |
| C108  | 7.874188090   | 2.326820735   | -6.657402527 |
| C109  | -0.133483539  | -3.857595990  | -9.404630643 |
| C110  | -1.120753153  | -2.686004111  | -9.463090095 |
| C111  | -0.127219867  | -4.455447560  | -7.979413455 |
| C112  | 0.534497678   | -5.845933931  | -7.954525567 |
| C113  | 0.805913177   | -6.277002871  | -6.530576618 |
| C114  | -1.543061361  | -0.327642056  | -8.967485507 |
| C115  | -0.827208302  | 0.907129081   | -9.477856423 |
| C116  | -2.272089510  | -0.136785859  | -7.613814953 |
| C117  | -1.327132815  | -0.192451164  | -6.440949346 |
| C118  | -0.578528323  | 0.931811409   | -6.054166706 |
| C119  | -1.098976500  | -1.411972009  | -5.780059395 |
| C120  | 0.402173234   | 0.817662284   | -5.063486812 |
| C121  | -0.118138685  | -1.523707180  | -4.789182289 |
| C122  | 0.648889537   | -0.409972357  | -4.439570528 |
| C123  | 8.351850743   | -7.016318625  | -1.709676986 |
| C124  | 9.146826437   | -7.180637851  | -0.403154114 |
| C125  | 6.874987767   | -7.416290448  | -1.558868341 |
| C126  | 5.992361547   | -7.116099707  | -2.732314417 |
| C127  | 5.998011704   | -7.744636380  | -3.961935813 |
| C128  | 4.291506656   | -6.337084058  | -3.860576163 |
| C129  | 9.689720030   | -8.508474787  | 1.563113694  |
| C130  | 11.182094337  | -8.415491967  | 1.332921205  |
| C131  | -0.018892168  | -6.908488805  | 0.384492284  |
| C132  | 1.334927785   | -6.734835607  | 1.013682112  |
| C133  | 2.526376554   | -7.123042042  | 0.049178531  |
| C134  | 2.374263774   | -8.606784954  | -0.395208097 |
| C135  | 3.590577855   | -9.110589260  | -1.189266140 |
| C136  | 3.602726925   | -10.597498347 | -1.399460714 |
| C137  | 3.822947027   | -7.038293951  | 0.911200662  |
| C138  | 4.105038718   | -1.132492552  | -0.999350141 |
| Fe139 | 4.747267076   | -2.436512044  | -2.413183409 |
| Fe140 | 2.585026921   | 0.263815623   | -0.422501404 |
| Fe141 | 5.287279941   | 0.008421264   | 0.175807993  |
| Fe142 | 4.667076999   | 0.184651089   | -2.384154928 |
| Fe143 | 4.564849834   | 2.363135511   | -0.846146085 |
| Fe144 | 4.917387103   | -2.522656266  | 0.182754765  |
| Fe145 | 2.684628709   | -2.386344144  | -0.960054155 |
| H146  | -6.581053768  | -6.773096739  | -1.455639064 |
| H147  | -6.227131513  | -5.889261232  | -2.780986294 |
| H148  | -9.923772686  | -3.879943402  | -1.985920010 |
| H149  | -8.521998801  | -5.387522783  | -3.188100100 |
| H150  | -8.972714752  | -6.456121348  | -1.863561712 |
| H151  | -8.410838495  | -1.908211775  | -0.641601545 |
| H152  | -10.332601595 | -4.543530820  | 0.829487251  |
| H153  | -10.187613389 | -1.998606266  | -0.702621823 |
| H154  | -10.561568217 | -5.125175056  | 3.068788657  |
| H155  | -7.908296079  | -5.272862843  | 1.637994491  |
| H156  | -10.286642227 | -3.423047548  | 3.514645827  |
| H157  | -3.778318705  | -2.205465284  | 2.224386277  |
| H158  | -6.191587442  | -3.495205721  | 1.310857759  |
| H159  | -5.835655742  | -6.147180066  | 2.257887810  |
| H160  | -6.530986495  | 0.660790930   | 4.793690090  |
| H161  | -7.239904887  | -1.629056125  | 3.134508947  |

|      |              |              |               |
|------|--------------|--------------|---------------|
| H162 | -6.240880414 | -5.955971534 | 3.982128798   |
| H163 | -5.051743904 | -1.484242382 | 1.214039926   |
| H164 | -7.299831710 | -2.800488910 | 5.606741738   |
| H165 | -8.075762081 | -0.229396768 | 4.785131672   |
| H166 | -1.728017425 | -3.647576513 | 3.883222709   |
| H167 | -1.081018660 | -2.818748232 | 2.450481815   |
| H168 | 0.012580762  | -3.265148066 | 3.773213415   |
| H169 | -2.262793096 | -1.199742962 | 3.920584895   |
| H170 | -7.426961984 | -3.747400831 | 7.698557608   |
| H171 | -2.853912732 | 2.061921294  | 4.225535390   |
| H172 | -4.484284289 | 0.370523631  | 8.055110314   |
| H173 | -4.163192424 | 3.817412873  | 7.999025446   |
| H174 | -0.355355627 | -0.387806548 | 2.581533988   |
| H175 | 0.784390476  | -0.783723337 | 3.872520953   |
| H176 | 7.052364166  | 1.262191099  | 7.411369483   |
| H177 | -3.707229220 | 3.621221901  | 4.294015225   |
| H178 | -4.406174543 | 4.636525458  | 6.439715377   |
| H179 | -2.019737021 | 3.505379216  | 4.855990763   |
| H180 | -2.774319381 | 4.532821929  | 7.148511814   |
| H181 | -4.457343474 | 2.150932098  | 6.166596121   |
| H182 | -1.507648046 | 2.234583551  | 6.994403688   |
| H183 | -3.100886049 | 0.167708172  | 5.675951761   |
| H184 | -0.419967457 | 0.508245385  | 4.109148168   |
| H185 | 1.558628564  | 4.350797207  | 0.818964093   |
| H186 | 0.437280898  | 5.141517747  | 1.969820005   |
| H187 | 2.373506818  | 5.490445477  | 2.936189546   |
| H188 | 1.925296317  | 5.026318254  | 5.488746014   |
| H189 | 4.390351120  | 4.050694838  | 3.134690206   |
| H190 | 5.873686852  | 2.099180677  | 3.498120245   |
| H191 | 4.057785032  | 1.434261774  | 7.356149904   |
| H192 | -3.235122001 | -2.300553015 | 6.006092991   |
| H193 | -3.215422349 | -5.456618423 | 6.629685615   |
| H194 | -3.199491572 | -4.790560489 | 8.277889897   |
| H195 | -4.924847433 | -3.898574788 | 6.031139367   |
| H196 | -6.985562447 | -2.193817722 | 8.447810684   |
| H197 | 2.546670891  | 3.363492734  | 6.975554151   |
| H198 | -0.266570471 | -2.113974245 | 6.049022319   |
| H199 | -4.767869648 | 1.569506067  | 10.565688117  |
| H200 | -5.082062081 | -0.147967591 | 10.206940279  |
| H201 | -2.377497742 | -0.372390681 | 10.568696196  |
| H202 | 8.655384330  | -7.601269546 | 7.612899979   |
| H203 | -0.817247685 | -5.852406013 | -4.019727562  |
| H204 | -0.090076500 | -8.662392327 | 1.184971901   |
| H205 | -0.141339240 | -6.581390798 | -8.414485836  |
| H206 | 1.471517651  | -5.831436407 | -8.529872566  |
| H207 | -1.156247042 | -4.545740508 | -7.599033560  |
| H208 | -0.002309182 | 0.696910815  | -10.198361337 |
| H209 | -0.580282902 | -4.607348725 | -10.075812386 |
| H210 | -2.658403845 | -1.907965274 | -3.149560633  |
| H211 | -3.761468602 | -4.484830650 | -1.920027651  |
| H212 | 0.292469684  | -1.395892042 | -8.654043923  |
| H213 | -2.321948924 | -0.523985121 | -9.731692447  |
| H214 | 1.707797238  | -2.902946142 | -9.323653133  |
| H215 | -0.884078263 | -5.526507310 | -2.289280272  |
| H216 | 0.397768722  | -3.760299936 | -7.306243868  |
| H217 | 1.723981972  | -4.338439276 | -10.130421709 |
| H218 | -5.893079746 | -3.038187699 | -4.439611807  |
| H219 | -3.227063709 | -1.881294380 | -1.472961448  |
| H220 | 2.667879288  | -5.688173923 | -6.773729239  |
| H221 | -2.181503806 | -3.915242216 | -1.400275222  |
| H222 | -4.132303433 | 3.188297094  | 1.703341024   |

|      |              |              |              |
|------|--------------|--------------|--------------|
| H223 | -2.614486109 | 1.080266245  | 0.551860413  |
| H224 | -8.625689077 | 1.544486382  | 1.189567356  |
| H225 | -7.075944823 | 0.653555599  | -1.202608163 |
| H226 | -6.723622174 | 4.716537105  | -0.122177826 |
| H227 | -8.376662045 | 9.617965199  | 0.953543879  |
| H228 | -7.805538261 | 6.102461247  | 2.517138272  |
| H229 | -8.861733835 | 6.278729015  | -0.035957041 |
| H230 | -6.047851149 | 7.461818457  | 0.381263719  |
| H231 | -9.273671763 | 10.307932471 | -3.127345458 |
| H232 | -2.964750161 | 4.677667052  | 0.108942091  |
| H233 | -4.198656468 | 4.409152836  | -1.123405619 |
| H234 | -9.092931024 | 11.331526589 | -0.794183100 |
| H235 | -7.664102566 | 6.326788106  | -1.331401579 |
| H236 | -5.568727072 | 2.169466942  | -0.502731285 |
| H237 | -7.456372228 | 0.224000022  | 1.198172373  |
| H238 | -9.249070747 | 2.456128588  | -3.246210354 |
| H239 | -0.867352618 | 1.712691710  | -3.260666568 |
| H240 | -9.695194739 | 0.745413294  | -3.116202785 |
| H241 | 8.857616682  | 2.202860364  | 6.165063001  |
| H242 | 7.529733796  | 2.549761028  | 5.277844028  |
| H243 | 2.669820059  | 5.880521550  | -0.866608029 |
| H244 | -0.154063767 | 5.991163330  | -0.125746680 |
| H245 | 2.532555012  | 8.255685583  | 0.300548114  |
| H246 | -2.366263613 | 3.776753411  | -2.753575570 |
| H247 | -3.406845628 | 4.474778312  | -4.462225593 |
| H248 | -3.246124470 | 5.773709320  | -3.562175182 |
| H249 | -3.672904377 | 1.681418848  | -5.376512017 |
| H250 | -5.310874080 | 1.719388086  | -6.094702574 |
| H251 | 1.723311027  | 12.109732287 | -2.496352928 |
| H252 | 0.464263879  | 13.356998234 | -2.721846735 |
| H253 | 1.278414918  | 9.954020421  | -3.251331206 |
| H254 | -0.344776651 | 9.437735510  | -3.661153070 |
| H255 | -0.053685692 | 8.873236590  | -7.093590954 |
| H256 | 0.093714504  | 4.419307264  | -6.390956166 |
| H257 | -5.748064748 | 9.214859303  | -3.036909342 |
| H258 | -2.291653828 | 8.942454540  | 0.533600900  |
| H259 | -2.313647520 | 7.814787566  | -4.607669068 |
| H260 | 2.916424067  | 4.655165416  | -3.264023613 |
| H261 | 4.198213794  | 6.586306488  | -2.491195197 |
| H262 | 0.451097508  | 4.476543028  | -3.719162784 |
| H263 | -7.447838425 | 0.118336364  | -3.570056611 |
| H264 | 5.834446697  | 9.244897039  | -3.333206688 |
| H265 | -5.035810007 | -0.599481002 | -4.734988152 |
| H266 | 3.154703531  | 5.461547298  | -4.821483528 |
| H267 | -2.201473099 | 7.384781516  | -1.376886028 |
| H268 | -5.502927199 | 3.734549096  | -4.702025937 |
| H269 | 5.062353532  | 9.867827059  | -1.860352214 |
| H270 | 0.586055877  | 7.305545424  | -7.441773635 |
| H271 | -2.021071649 | 8.972526572  | -5.850802206 |
| H272 | -4.243951606 | -3.273856910 | -4.570276587 |
| H273 | -5.456555329 | -2.718380135 | -2.204469459 |
| H274 | -5.754930369 | 10.870735752 | -1.194309773 |
| H275 | -4.666583438 | 1.831005016  | -3.095015477 |
| H276 | 1.804594282  | 7.412567667  | -4.053788488 |
| H277 | 1.254274444  | 5.746906612  | -6.372154357 |
| H278 | 1.521210045  | 3.604973469  | -4.803717910 |
| H279 | -1.339659307 | 5.752884998  | -4.823515332 |
| H280 | 1.169563026  | 9.539521657  | 2.508098788  |
| H281 | 0.759432619  | 10.281967244 | -0.708339202 |
| H282 | 1.125386536  | 13.166741598 | -0.366803160 |
| H283 | 2.820606790  | 9.829640117  | 1.914478198  |

|      |              |               |              |
|------|--------------|---------------|--------------|
| H284 | -1.477617887 | 11.126482008  | 0.315653948  |
| H285 | 6.873592141  | -3.722915936  | -7.322407893 |
| H286 | 6.497730809  | -5.163589669  | -6.360030350 |
| H287 | 8.403440403  | -5.944015272  | -1.947763456 |
| H288 | 7.481553171  | -5.838754437  | -8.431712259 |
| H289 | 5.890327410  | -6.212283342  | -8.549574880 |
| H290 | 6.135369788  | 4.545421041   | 0.960856930  |
| H291 | 6.126867583  | 7.419397999   | 2.121517075  |
| H292 | 6.674888675  | 7.436490109   | -2.126926576 |
| H293 | 4.679917084  | 5.565984086   | 1.185873936  |
| H294 | 7.563625663  | 7.787955661   | 1.429640272  |
| H295 | 6.940686671  | 2.448423730   | -4.725590001 |
| H296 | 7.232230819  | 6.291763203   | -0.350944130 |
| H297 | 2.874092297  | -6.705067816  | 6.550250137  |
| H298 | 5.140093636  | -8.100487689  | 5.026646363  |
| H299 | 5.524513545  | 0.775222858   | -5.587847673 |
| H300 | 3.627594970  | -0.019032814  | 4.127160935  |
| H301 | 3.196258046  | 1.025255331   | -8.176423623 |
| H302 | 0.058533469  | -2.481954458  | -4.295666711 |
| H303 | 2.454078367  | 1.613471487   | -6.692943955 |
| H304 | 2.399629703  | -4.231715525  | 5.550868181  |
| H305 | 3.912256435  | -0.390519406  | -5.616153974 |
| H306 | 2.615470818  | -4.918179421  | 3.939454487  |
| H307 | 2.904702411  | -7.137401069  | 4.826300628  |
| H308 | 4.958861629  | -5.602478507  | 4.564667594  |
| H309 | 4.672581874  | -5.030304525  | 6.218570154  |
| H310 | -3.025586796 | -0.933019735  | -7.529162947 |
| H311 | 3.217616593  | -9.209952799  | 7.044317201  |
| H312 | 2.431547263  | -11.711762729 | 5.426992839  |
| H313 | 1.435278476  | -0.474038316  | -3.685709531 |
| H314 | 3.117131944  | -11.448718451 | 8.250045241  |
| H315 | 1.656978776  | -11.687426228 | 7.545981966  |
| H316 | 4.338670422  | -3.317227254  | 3.464006332  |
| H317 | 1.001682882  | 1.679335640   | -4.761949257 |
| H318 | -1.692019894 | -2.289684953  | -6.046874871 |
| H319 | 6.703071898  | -10.526598477 | 1.443261281  |
| H320 | 6.825980452  | -8.503826656  | -1.371321026 |
| H321 | 5.433611839  | -8.632666149  | 2.319967682  |
| H322 | 6.239945644  | -11.235564291 | 0.153677342  |
| H323 | 7.703448897  | 1.669124536   | -7.543721547 |
| H324 | 5.765133984  | -5.507859847  | 1.840885438  |
| H325 | 1.422832208  | -7.328692487  | 1.934932075  |
| H326 | 5.238925399  | -2.581272434  | -6.192262558 |
| H327 | 2.247599660  | -9.226270243  | 0.506313632  |
| H328 | 4.621709179  | -7.514434834  | -5.586650584 |
| H329 | 3.392330787  | -5.808635239  | -4.151699939 |
| H330 | 3.851507639  | -12.386721465 | 6.232642058  |
| H331 | 4.285356731  | -1.136056717  | 2.967593606  |
| H332 | 7.227303748  | -6.391061907  | 3.532355338  |
| H333 | 6.671876117  | -4.291136325  | 2.168773860  |
| H334 | 7.026124448  | -7.256414482  | 5.752389892  |
| H335 | 2.678300153  | -2.398996529  | 6.503300076  |
| H336 | 2.606012401  | -12.018937242 | -2.151596046 |
| H337 | 3.605265104  | -8.613235569  | -2.170583240 |
| H338 | 4.523538624  | -8.860639046  | -0.672820558 |
| H339 | 1.470608002  | -8.702938907  | -1.013944847 |
| H340 | 2.979524573  | -2.538707800  | -5.338036518 |
| H341 | -0.751070006 | 1.888645661   | -6.553624619 |
| H342 | -2.798834756 | 0.828625326   | -7.663916763 |
| H343 | 1.466377487  | -5.670681571  | 1.252271688  |
| H344 | 7.149931114  | -7.943665487  | 3.535262919  |

|       |              |               |              |
|-------|--------------|---------------|--------------|
| H345  | 5.717537012  | -9.696712682  | 3.417438663  |
| H346  | 2.355430349  | -0.801469815  | 5.956250270  |
| H347  | 6.663345524  | -8.490691121  | -4.380890579 |
| H348  | 6.456812405  | -6.920623504  | -0.674075349 |
| H349  | 2.443973616  | -3.364653479  | -6.832091959 |
| H350  | 6.332221346  | 3.602041407   | -5.938616474 |
| H351  | 5.522185560  | -0.305095422  | 6.307217404  |
| H352  | 6.291310296  | -0.008562336  | 4.727638598  |
| H353  | 9.953171401  | -7.392695910  | -2.936125510 |
| H354  | 9.101504160  | -8.737453911  | -2.557098914 |
| H355  | 9.479807937  | -9.529265736  | 1.918992440  |
| H356  | 8.197854090  | -8.973087973  | 0.114481544  |
| H357  | 11.511519362 | -8.656098376  | 0.293694139  |
| H358  | 9.388861381  | -7.810504807  | 2.360920481  |
| H359  | 8.740642572  | -0.731346694  | 5.771263964  |
| H360  | -2.463913999 | 13.604050263  | 2.129675360  |
| H361  | 7.334089658  | -7.197747593  | 8.745178415  |
| H362  | 7.402269990  | -4.793426452  | 7.419522106  |
| H363  | -3.668835541 | 12.770357386  | -0.530618053 |
| H364  | -3.505087977 | 10.741785778  | 1.783143507  |
| H365  | -4.994864971 | 11.440581897  | 1.122566342  |
| H366  | -4.677353981 | 7.427236948   | -3.951380870 |
| H367  | 0.321830590  | -1.404517573  | 0.372661418  |
| H368  | -0.990670832 | 0.181012313   | -1.248139049 |
| Mo369 | 3.990193852  | -4.709783442  | -1.057407051 |
| N370  | -6.941925158 | -6.496033250  | -2.372061362 |
| N371  | -9.231904672 | -3.761304840  | -1.249846453 |
| N372  | -9.891865851 | -3.924173599  | 1.505594826  |
| N373  | -7.657908035 | -5.209365499  | 2.623866918  |
| N374  | -5.586804708 | -3.286012628  | 2.106751637  |
| N375  | -6.547783249 | -1.133880098  | 3.702101678  |
| N376  | -6.855391484 | -2.266652103  | 6.358252371  |
| N377  | -4.557741617 | -3.886529677  | 6.987346014  |
| N378  | -2.268482516 | -2.519901226  | 6.236401173  |
| N379  | -2.368421219 | 0.462938328   | 6.323732254  |
| N380  | -3.896236459 | 0.781746098   | 8.783803943  |
| N381  | 2.533172122  | -11.171214975 | 7.458228155  |
| N382  | 3.853064748  | -9.173179241  | 6.239787667  |
| N383  | 3.775547178  | -3.226797837  | 4.314639690  |
| N384  | 2.629928518  | -1.751410012  | 5.723234790  |
| N385  | 3.645673677  | -0.974495585  | 3.775958238  |
| N386  | 6.752065437  | -7.268382990  | 6.759026727  |
| N387  | -4.981648705 | -2.595810659  | -4.305927954 |
| N388  | -1.247869605 | -5.361572329  | -3.230334292 |
| N389  | -5.175009007 | -0.001889504  | -3.903775688 |
| N390  | -7.662379281 | 1.102891808   | -3.431161316 |
| N391  | -7.818180465 | 1.120356936   | -0.671337000 |
| N392  | -5.693150881 | 2.671320046   | 0.375248178  |
| N393  | -2.233652993 | 2.951476854   | -2.110191122 |
| N394  | -1.578050324 | 1.039450787   | -1.340558157 |
| N395  | -6.304422545 | 5.373282276   | 0.532340069  |
| N396  | -8.671733585 | 8.476672150   | -2.162706938 |
| N397  | -8.910737501 | 10.353825132  | -1.004827691 |
| N398  | 8.122081247  | 1.777149788   | 5.595253081  |
| N399  | 6.901331393  | 7.021365444   | 1.580153802  |
| N400  | 5.925672931  | 7.966836609   | -1.690410791 |
| N401  | 3.542554002  | 7.237407689   | -2.950668573 |
| N402  | -0.591209114 | 6.136198473   | -5.428033152 |
| N403  | 0.069809182  | 7.906749789   | -6.809457503 |
| N404  | -1.666180036 | 8.193492091   | -5.301662731 |
| N405  | 1.731689732  | 6.318850171   | -0.937945499 |

|      |              |               |              |
|------|--------------|---------------|--------------|
| N406 | 1.652883687  | 8.589839046   | 0.707447074  |
| N407 | 0.760596167  | 11.139272266  | -0.153867931 |
| N408 | 0.270703156  | 10.152902683  | -3.275881846 |
| N409 | -1.810471537 | 12.073460335  | 0.153678892  |
| N410 | 6.548778157  | -5.428480522  | -8.516992934 |
| N411 | 4.495841073  | -3.110277003  | -6.662083759 |
| N412 | 3.469856505  | -0.227918077  | -6.544079754 |
| N413 | 5.552866538  | 1.669871211   | -6.094235085 |
| N414 | 1.171018655  | -3.493506294  | -9.970902454 |
| N415 | -0.662666392 | -1.481238043  | -9.018598231 |
| N416 | 9.001228228  | -7.749881496  | -2.813555712 |
| N417 | 4.917178863  | -6.229389593  | -2.691438034 |
| N418 | 4.919707456  | -7.239224897  | -4.655089066 |
| N419 | 8.935465318  | -8.305245840  | 0.336196573  |
| N420 | 0.437857953  | 1.795395439   | 0.887887767  |
| N421 | 1.250952876  | 1.212223493   | 0.351670618  |
| O422 | -7.226895773 | -4.431033173  | -0.402156150 |
| O423 | -8.736518958 | -1.988166918  | 1.838267556  |
| O424 | -8.225627392 | -4.348074298  | 4.661568478  |
| O425 | -4.630563989 | -4.024826559  | 4.035959258  |
| O426 | -4.385456114 | -0.460797835  | 3.941494228  |
| O427 | -6.158731372 | -0.223541577  | 7.110880583  |
| O428 | -5.003032273 | -3.536866232  | 9.211096361  |
| O429 | -0.905635728 | -4.140080851  | 7.135162309  |
| O430 | -0.270186432 | 0.090025437   | 7.144645992  |
| O431 | -2.218335642 | 2.196674736   | 9.366157944  |
| O432 | -3.159819815 | 0.428568656   | 12.273945750 |
| O433 | 4.812958713  | -10.573955281 | 4.669440114  |
| O434 | 5.065073706  | -7.617468840  | 8.282793032  |
| O435 | 9.267843450  | -5.133640129  | 8.171676156  |
| O436 | -5.302443078 | -0.163760484  | -1.620475675 |
| O437 | -2.734984231 | -4.336996135  | -4.613399583 |
| O438 | -6.842299908 | 3.232676943   | -3.585170870 |
| O439 | -4.661331757 | 3.474872367   | -5.161233528 |
| O440 | -9.877697052 | 2.139727620   | -0.735924885 |
| O441 | -6.617858027 | 2.560459815   | 2.458888127  |
| O442 | -4.676924155 | 5.654888182   | 2.114304938  |
| O443 | -7.301570986 | 8.080263869   | 2.580662706  |
| O444 | 8.090997373  | -1.065566601  | 7.677848478  |
| O445 | 2.574388853  | 4.917430348   | 4.769318982  |
| O446 | 4.615386390  | 8.249027548   | 0.150070060  |
| O447 | 3.079937494  | 9.436321028   | -3.438601555 |
| O448 | 0.048268964  | 6.969732479   | -2.346619108 |
| O449 | -0.358316065 | 7.898374480   | 1.564821850  |
| O450 | 2.407688050  | 5.843730741   | 2.023700900  |
| O451 | 1.503439894  | 12.103373640  | 1.783963932  |
| O452 | -1.294269408 | 14.111433154  | -0.728234914 |
| O453 | -1.466891783 | 11.632502120  | -3.187152969 |
| O454 | -4.336893447 | 14.185582620  | 1.560073186  |
| O455 | -3.889793390 | 7.306393714   | -3.386434397 |
| O456 | 3.926220750  | -5.089994138  | -7.678985136 |
| O457 | 2.208678093  | -1.221036048  | -8.178237558 |
| O458 | 4.458209232  | 3.194109174   | -7.401947686 |
| O459 | 8.966186075  | 2.821087420   | -6.428919403 |
| O460 | -2.286835080 | -2.842904868  | -9.864443579 |
| O461 | -0.056498854 | -6.732019959  | -5.784436785 |
| O462 | 2.061530230  | -6.094740811  | -6.077544586 |
| O463 | -1.133508620 | 2.053595954   | -9.183955291 |
| O464 | 10.024266538 | -6.361023835  | -0.073115875 |
| O465 | 11.989566104 | -8.175970163  | 2.219297303  |
| O466 | -0.593036828 | -6.081145451  | -0.310781966 |

|  |                      |              |               |              |
|--|----------------------|--------------|---------------|--------------|
|  | O467                 | -0.647676165 | -8.108136031  | 0.605675917  |
|  | O468                 | 4.491534868  | -11.364510665 | -1.036349621 |
|  | O469                 | 2.504519890  | -11.047088343 | -2.063463452 |
|  | O470                 | 4.699728528  | -6.176695405  | 0.510399511  |
|  | O471                 | 3.977408649  | -7.806941859  | 1.888562963  |
|  | O472                 | 2.576537647  | -6.266145955  | -1.032040757 |
|  | O473                 | 7.558034533  | -7.182656884  | 4.026625527  |
|  | O474                 | 6.298632432  | -5.099308342  | 2.570722595  |
|  | O475                 | -2.749271261 | 4.998343663   | -3.924035079 |
|  | O476                 | 7.017607641  | -11.153262136 | 0.743497889  |
|  | O477                 | 6.167748521  | -9.206516278  | 2.681338560  |
|  | S478                 | 4.761785954  | 4.676685160   | -1.066782037 |
|  | S479                 | 2.876997675  | 1.619899898   | -2.298469622 |
|  | S480                 | 2.833026108  | -3.564917165  | -2.814323059 |
|  | S481                 | 3.891273387  | 1.440849314   | 1.090121389  |
|  | S482                 | 0.751203041  | -1.316011785  | -0.920481913 |
|  | S483                 | 5.431371432  | -1.108264261  | -4.092274830 |
|  | S484                 | 3.044503435  | -3.563659548  | 0.858144602  |
|  | S485                 | 6.463320785  | 1.166745800   | -1.314709418 |
|  | S486                 | 6.168023623  | -3.732868157  | -1.215652030 |
|  | S487                 | 6.101606177  | -1.426693845  | 1.677615840  |
|  | <b>7u(a)</b>         |              |               |              |
|  | Fe( 139)             | 0.537        | 2.172         |              |
|  | Fe( 140)             | 0.439        | -1.996        |              |
|  | Fe( 141)             | 0.545        | 2.578         |              |
|  | Fe( 142)             | 0.552        | -2.640        |              |
|  | Fe( 143)             | 0.569        | 2.871         |              |
|  | Fe( 144)             | 0.510        | -2.322        |              |
|  | Fe( 145)             | 0.475        | 1.168         |              |
|  | <b>S=1</b>           |              |               |              |
|  | bm2cnx2b2n2x47.car_4 |              |               |              |
|  | C1                   | -6.681168570 | -6.608949147  | 0.577746782  |
|  | C2                   | -6.492864778 | -7.908310013  | -0.213371326 |
|  | C3                   | -8.236840428 | -4.814405046  | 1.200716163  |
|  | C4                   | -8.030576743 | -4.790853422  | 2.713360862  |
|  | C5                   | -8.068383744 | -6.029067350  | 4.818916208  |
|  | C6                   | -6.599691595 | -5.912973299  | 5.241203085  |
|  | C7                   | -4.260169544 | -6.254358616  | 4.593355699  |
|  | C8                   | -3.777846907 | -4.815285515  | 4.388977073  |
|  | C9                   | -3.908197069 | -2.773571872  | 3.066936316  |
|  | C10                  | -4.396273755 | -1.822891963  | 4.170862296  |
|  | C11                  | -6.147587979 | -1.232737567  | 5.748178539  |
|  | C12                  | -5.503179554 | -1.474097022  | 7.119429841  |
|  | C13                  | -4.936724889 | -3.115034449  | 8.844883728  |
|  | C14                  | -3.429090397 | -3.239414330  | 9.093510262  |
|  | C15                  | -1.237393691 | -3.864280471  | 8.172919976  |
|  | C16                  | -0.302435234 | -2.832518433  | 7.534980719  |
|  | C17                  | -0.167381409 | -0.878471925  | 6.011145579  |
|  | C18                  | -0.482346538 | 0.536766471   | 6.531738656  |
|  | C19                  | -0.375242996 | -1.040576787  | 4.482407266  |
|  | C20                  | 0.253394348  | 0.111201783   | 3.691003477  |
|  | C21                  | 0.165318525  | -2.393648830  | 4.005359760  |
|  | C22                  | -2.196116402 | 2.263333108   | 6.934820983  |
|  | C23                  | -2.353014865 | 2.270823532   | 8.468543822  |
|  | C24                  | -3.467679833 | 2.756251758   | 6.204154080  |
|  | C25                  | -3.974759935 | 4.072860456   | 6.805876091  |
|  | C26                  | -3.204597696 | 2.923056477   | 4.701870963  |
|  | C27                  | -3.357441686 | 1.286854001   | 10.444201126 |
|  | C28                  | -2.077293156 | 1.330879879   | 11.254768561 |
|  | C29                  | 6.735917378  | -9.066798726  | 7.263321965  |
|  | C30                  | 7.195790049  | -7.865375960  | 6.438632481  |
|  | C31                  | 7.060897658  | -5.373147021  | 6.320577547  |
|  | C32                  | 7.982422706  | -4.613351449  | 7.293382438  |
|  | C33                  | 5.759139023  | -4.597467287  | 6.050244920  |
|  | C34                  | 5.984419629  | -3.219084050  | 5.425069543  |
|  | C35                  | 4.672734854  | -2.635160049  | 4.903680635  |
|  | C36                  | 4.184945797  | -0.240762342  | 4.359115551  |
|  | C37                  | 10.062176469 | -3.341027840  | 7.519809637  |
|  | C38                  | 10.073842476 | -1.846507957  | 7.287747926  |



|     |               |              |              |
|-----|---------------|--------------|--------------|
| C39 | -4.261413821  | -3.784302053 | -1.893163005 |
| C40 | -4.969916278  | -2.419616182 | -1.883197711 |
| C41 | -2.768682073  | -3.537624508 | -1.587703797 |
| C42 | -1.929019227  | -4.783536354 | -1.239916079 |
| C43 | -1.293429405  | -5.495224307 | -2.432571753 |
| C44 | -5.806572574  | -0.627673598 | -3.340252231 |
| C45 | -7.275007754  | -0.401620185 | -2.951610012 |
| C46 | -5.545685872  | -0.142297977 | -4.780229305 |
| C47 | -9.225566728  | -1.317351735 | -1.784113228 |
| C48 | -9.107646401  | -0.913502051 | -0.305238410 |
| C49 | -7.614881682  | -0.611311316 | 1.627759261  |
| C50 | -6.799802211  | 0.665087395  | 1.845547682  |
| C51 | -5.336566100  | 2.400647502  | 0.919529667  |
| C52 | -6.212952534  | 3.643545825  | 1.216928366  |
| C53 | -4.558589463  | 2.743032533  | -0.360853391 |
| C54 | -3.535908989  | 1.762551689  | -0.847018153 |
| C55 | -2.791563059  | 0.773368076  | -0.251206784 |
| C56 | -2.128216511  | 0.921220557  | -2.362040546 |
| C57 | -8.296797576  | 4.809646757  | 0.570213664  |
| C58 | -8.688922007  | 5.187574199  | 1.996445054  |
| C59 | -9.549400108  | 4.442148923  | -0.261156854 |
| C60 | -10.331855778 | 5.591892671  | -0.825721715 |
| C61 | -10.738269444 | 6.780176745  | -0.248677187 |
| C62 | -11.436007160 | 6.663651952  | -2.348923476 |
| C63 | 7.414969011   | 3.766463006  | 5.162894886  |
| C64 | 8.534989559   | 2.782303736  | 5.446009434  |
| C65 | 6.197638410   | 2.931321090  | 4.690522912  |
| C66 | 4.972259806   | 3.775734149  | 4.425578724  |
| C67 | 4.031771285   | 4.041257384  | 5.438689881  |
| C68 | 4.746953430   | 4.336112037  | 3.156427042  |
| C69 | 2.901505837   | 4.828842705  | 5.192394471  |
| C70 | 3.630824148   | 5.132949185  | 2.898748936  |
| C71 | 2.706337215   | 5.374373774  | 3.918397844  |
| C72 | 4.377580696   | 7.912639213  | -1.518341986 |
| C73 | 3.228910109   | 8.620745289  | -2.247108359 |
| C74 | 3.898569195   | 6.556062697  | -0.990146479 |
| C75 | 2.361871505   | 9.411415244  | -4.406529472 |
| C76 | 1.097958042   | 8.588713596  | -4.663411072 |
| C77 | 0.024509378   | 6.367752226  | -4.523682501 |
| C78 | -0.817187387  | 6.294352008  | -3.230768085 |
| C79 | 0.519632324   | 4.990652455  | -5.001232417 |
| C80 | -0.538336686  | 3.910132928  | -5.245475599 |
| C81 | -1.465554243  | 4.104197278  | -6.459041420 |
| C82 | -3.249505271  | 5.830902239  | -6.697761966 |
| C83 | -0.885209440  | 6.249051842  | -0.793422900 |
| C84 | -1.369502067  | 7.633043349  | -0.317491805 |
| C85 | -0.092817060  | 5.598596339  | 0.349412262  |
| C86 | -0.771164576  | 9.989992492  | -0.059903803 |
| C87 | -1.586451980  | 11.099333300 | -0.719085916 |
| C88 | -2.999124866  | 11.799768876 | -2.609649013 |
| C89 | -4.466146319  | 12.005430895 | -2.173205309 |
| C90 | -2.911884793  | 11.540859845 | -4.130274388 |
| C91 | -3.596868577  | 10.239186166 | -4.530410167 |
| C92 | -6.376261445  | 11.070600596 | -0.943137598 |
| C93 | -6.695824485  | 12.273400380 | -0.061974503 |
| C94 | -6.719924318  | 9.753962173  | -0.195061229 |
| C95 | -6.569188669  | 8.543144367  | -1.087151661 |
| C96 | -7.606507223  | 8.165373153  | -1.955030977 |
| C97 | -5.374503257  | 7.805548429  | -1.121326446 |
| C98 | -7.450494098  | 7.106566771  | -2.853070921 |
| C99 | -5.188403780  | 6.761724785  | -2.034074589 |

|       |              |              |              |
|-------|--------------|--------------|--------------|
| C100  | -6.231930934 | 6.427286268  | -2.894728753 |
| C101  | 6.573028059  | -4.122278146 | -7.367533301 |
| C102  | 5.072495385  | -4.153189793 | -7.134672233 |
| C103  | 3.120256898  | -2.840125099 | -6.332543736 |
| C104  | 2.444527642  | -1.756997044 | -7.178550722 |
| C105  | 2.253631326  | 0.655194248  | -7.560724605 |
| C106  | 3.126887122  | 1.904449983  | -7.639011683 |
| C107  | 5.146140553  | 3.111817302  | -6.962285007 |
| C108  | 6.302483862  | 3.026187247  | -7.938243245 |
| C109  | 0.020751475  | -5.340059630 | -8.645126084 |
| C110  | -1.249954535 | -4.486642853 | -8.734607102 |
| C111  | 0.324129849  | -5.663058009 | -7.165088988 |
| C112  | 1.338782013  | -6.812984804 | -7.037051755 |
| C113  | 1.844392915  | -6.917514445 | -5.616183285 |
| C114  | -2.247178369 | -2.263031072 | -8.519998085 |
| C115  | -1.943204587 | -1.003064416 | -9.306796633 |
| C116  | -2.865184933 | -2.022124245 | -7.121317967 |
| C117  | -1.830228096 | -1.640429647 | -6.093252731 |
| C118  | -1.375441555 | -0.315511533 | -5.974421282 |
| C119  | -1.222955287 | -2.631693599 | -5.302139114 |
| C120  | -0.310804422 | -0.007553267 | -5.119524859 |
| C121  | -0.160736261 | -2.321379748 | -4.445604435 |
| C122  | 0.311447624  | -1.008071413 | -4.364862257 |
| C123  | 9.712617704  | -4.884203137 | -1.814748267 |
| C124  | 10.643999839 | -4.618727568 | -0.620815653 |
| C125  | 8.413724201  | -5.595557199 | -1.399037259 |
| C126  | 7.371012741  | -5.737845694 | -2.467383396 |
| C127  | 7.427919266  | -6.542690384 | -3.587498469 |
| C128  | 5.428219979  | -5.601840730 | -3.457845675 |
| C129  | 11.720330554 | -5.415202304 | 1.411165863  |
| C130  | 13.098881981 | -4.972901235 | 0.973706983  |
| C131  | 1.863541659  | -6.546084196 | 1.374180512  |
| C132  | 3.158236568  | -5.895249513 | 1.770969201  |
| C133  | 4.313997603  | -6.130516809 | 0.717452753  |
| C134  | 4.530391237  | -7.657935328 | 0.516572817  |
| C135  | 5.761759012  | -7.973923562 | -0.348334548 |
| C136  | 6.150531188  | -9.427072931 | -0.350064306 |
| C137  | 5.613857409  | -5.569701191 | 1.373063907  |
| C138  | 4.157266880  | -0.209324894 | -1.392209203 |
| Fe139 | 4.906881154  | -1.563476443 | -2.638423383 |
| Fe140 | 2.584316279  | 0.980381937  | -0.932356364 |
| Fe141 | 5.120785935  | 1.344444360  | -0.550963429 |
| Fe142 | 4.400869295  | 0.943418266  | -3.016791161 |
| Fe143 | 3.653054148  | 3.274204800  | -1.957327380 |
| Fe144 | 5.388932321  | -1.125737444 | -0.095906399 |
| Fe145 | 2.986230678  | -1.717421532 | -0.947389749 |
| H146  | -4.611364989 | -8.341330079 | 0.443014624  |
| H147  | -4.636760666 | -7.635514073 | -1.029062524 |
| H148  | -8.640185304 | -6.506031432 | -0.043888180 |
| H149  | -7.019030057 | -7.823584535 | -1.177779744 |
| H150  | -7.016716515 | -8.699230380 | 0.351211513  |
| H151  | -7.602217622 | -4.015896135 | 0.790681285  |
| H152  | -8.583379856 | -6.762985435 | 2.861163019  |
| H153  | -9.285270582 | -4.560210810 | 0.992629731  |
| H154  | -8.464202532 | -6.991421676 | 5.169392599  |
| H155  | -5.999883202 | -6.705203379 | 3.445214767  |
| H156  | -8.612710948 | -5.224709174 | 5.329851704  |
| H157  | -2.817976616 | -2.655671753 | 3.009186269  |
| H158  | -4.850369948 | -4.661152903 | 2.625629163  |
| H159  | -3.723182546 | -6.917928313 | 3.902166713  |
| H160  | -5.989690590 | -0.176586232 | 5.495508005  |

|      |              |              |               |
|------|--------------|--------------|---------------|
| H161 | -6.210821583 | -2.816953168 | 4.290948416   |
| H162 | -4.003061179 | -6.538692944 | 5.620640908   |
| H163 | -4.337843169 | -2.466011940 | 2.102317600   |
| H164 | -5.709217524 | -3.523894932 | 6.897763737   |
| H165 | -7.227992788 | -1.414446532 | 5.830870791   |
| H166 | -0.306118414 | -3.229482031 | 4.541472401   |
| H167 | -0.034433173 | -2.525889575 | 2.931350972   |
| H168 | 1.255431142  | -2.455758376 | 4.149389303   |
| H169 | -1.462656932 | -1.021306956 | 4.302315463   |
| H170 | -5.395556028 | -4.077096628 | 9.115451665   |
| H171 | -2.887430655 | 1.982976353  | 4.227962846   |
| H172 | -3.635231273 | 0.626199670  | 8.434571303   |
| H173 | -4.258966331 | 3.965785298  | 7.862985120   |
| H174 | 0.022216503  | 0.000547377  | 2.622076003   |
| H175 | 1.348260662  | 0.116951121  | 3.784769295   |
| H176 | 7.140903008  | 4.245370382  | 6.123141481   |
| H177 | -4.121082532 | 3.264702702  | 4.198471927   |
| H178 | -4.857632445 | 4.419785743  | 6.249512336   |
| H179 | -2.420075810 | 3.677703416  | 4.529857957   |
| H180 | -3.202842251 | 4.855831007  | 6.740172879   |
| H181 | -4.253461164 | 1.991472307  | 6.341174436   |
| H182 | -1.373559708 | 2.966935627  | 6.737725612   |
| H183 | -2.469355737 | 0.363948111  | 5.963593550   |
| H184 | -0.126908853 | 1.093389298  | 4.008886871   |
| H185 | 0.352224047  | 4.654636066  | -0.011747965  |
| H186 | -0.811286462 | 5.365455412  | 1.151022204   |
| H187 | 1.082445605  | 6.305062602  | 1.760642828   |
| H188 | 1.015334134  | 6.208118323  | 4.380640837   |
| H189 | 3.456758086  | 5.537112019  | 1.900670214   |
| H190 | 5.438810081  | 4.118229544  | 2.339281031   |
| H191 | 4.178234746  | 3.621348468  | 6.438034940   |
| H192 | -1.908590054 | -1.967389706 | 6.628972499   |
| H193 | -0.983296571 | -4.841287451 | 7.734903476   |
| H194 | -0.999063240 | -3.898991748 | 9.244088297   |
| H195 | -3.100874790 | -3.884735457 | 7.144704580   |
| H196 | -5.301168229 | -2.352994869 | 9.545058150   |
| H197 | 2.173198678  | 5.011828823  | 5.987315627   |
| H198 | 0.891342033  | -1.039294038 | 6.254270511   |
| H199 | -4.004491592 | 2.121174555  | 10.760934136  |
| H200 | -3.867888252 | 0.345175507  | 10.700489848  |
| H201 | -1.185791103 | 0.882882567  | 10.756433743  |
| H202 | 11.072543053 | -3.743613166 | 7.351007359   |
| H203 | 0.416924447  | -6.471190927 | -3.000995023  |
| H204 | 2.382523204  | -8.064084375 | 2.445822685   |
| H205 | 0.848739089  | -7.761249954 | -7.301748242  |
| H206 | 2.179482162  | -6.655645164 | -7.728147491  |
| H207 | -0.602431873 | -5.946190523 | -6.642168266  |
| H208 | -1.199003162 | -1.142836220 | -10.125931843 |
| H209 | -0.265372062 | -6.282491380 | -9.137377576  |
| H210 | -2.315643125 | -3.007097054 | -2.439968307  |
| H211 | -2.550814719 | -5.526608919 | -0.710104658  |
| H212 | -0.171141276 | -2.765531654 | -8.305143734  |
| H213 | -3.012544348 | -2.781049447 | -9.132906127  |
| H214 | 1.537940771  | -3.954996208 | -8.948106430  |
| H215 | 0.449451130  | -5.836628672 | -1.357161164  |
| H216 | 0.698843569  | -4.752081479 | -6.673251647  |
| H217 | 1.853858173  | -5.450241438 | -9.564071711  |
| H218 | -5.233385762 | -5.125551362 | -3.126293190  |
| H219 | -2.725853065 | -2.856173063 | -0.725652940  |
| H220 | 3.456316622  | -5.941020400 | -6.184960684  |
| H221 | -1.136823682 | -4.486123671 | -0.538287907  |

|      |               |              |              |
|------|---------------|--------------|--------------|
| H222 | -4.654037021  | 2.294164724  | 1.775994031  |
| H223 | -2.781156275  | 0.414148463  | 0.770336158  |
| H224 | -8.586102273  | -0.447968214 | 2.111968080  |
| H225 | -7.074313496  | -1.354497665 | -0.298780387 |
| H226 | -7.720806441  | 2.789816624  | 0.128789305  |
| H227 | -10.577594178 | 7.210085135  | 0.734098544  |
| H228 | -8.804771724  | 4.313816431  | 2.682495621  |
| H229 | -10.196250512 | 3.778052175  | 0.339147542  |
| H230 | -7.775515185  | 5.664949511  | 0.112111772  |
| H231 | -11.924320298 | 6.960131178  | -3.274414994 |
| H232 | -4.055754319  | 3.705894428  | -0.172827978 |
| H233 | -5.280426399  | 2.925692985  | -1.174030378 |
| H234 | -11.857982154 | 8.367843957  | -1.143813347 |
| H235 | -9.210110992  | 3.846685776  | -1.123290314 |
| H236 | -5.994770645  | 0.597962429  | -0.055565036 |
| H237 | -7.121878432  | -1.430653850 | 2.171907619  |
| H238 | -9.831335495  | -0.547588110 | -2.278809538 |
| H239 | -1.591109453  | 0.737048901  | -3.287173163 |
| H240 | -9.776831246  | -2.265476218 | -1.838127595 |
| H241 | 8.492796269   | 5.387517710  | 4.521387340  |
| H242 | 7.041337783   | 5.236015104  | 3.787452673  |
| H243 | 0.881501443   | 6.119482543  | -2.040045599 |
| H244 | -1.794669858  | 5.652624529  | -0.957537566 |
| H245 | 0.231494475   | 8.541767782  | -1.223442052 |
| H246 | -3.492531385  | 2.471011444  | -2.897748899 |
| H247 | -4.896045535  | 2.631153321  | -4.534802073 |
| H248 | -5.000280659  | 4.063319267  | -3.856704012 |
| H249 | -4.477014423  | -0.250227689 | -5.010116806 |
| H250 | -6.121652610  | -0.752950069 | -5.495901440 |
| H251 | -1.852129844  | 11.548745192 | -4.424912687 |
| H252 | -3.425205603  | 12.368677207 | -4.636071676 |
| H253 | -1.752495498  | 9.235748225  | -4.745400603 |
| H254 | -3.201636005  | 8.262736187  | -4.860676851 |
| H255 | -3.101044844  | 7.213925907  | -8.198975990 |
| H256 | -1.691943131  | 3.129348738  | -6.916962061 |
| H257 | -8.274123773  | 6.810107718  | -3.507493293 |
| H258 | -4.557941076  | 8.033787212  | -0.429734656 |
| H259 | -4.764289885  | 6.064826882  | -5.315592129 |
| H260 | 1.233142555   | 4.593419879  | -4.261743464 |
| H261 | 2.015347265   | 6.891121554  | -3.944055696 |
| H262 | -1.142646956  | 3.742340118  | -4.340241773 |
| H263 | -7.497224493  | -2.369117702 | -2.499024157 |
| H264 | 2.799750784   | 9.665024440  | -5.381396018 |
| H265 | -5.096291996  | -2.651671876 | -3.864169455 |
| H266 | 1.089078318   | 5.153043566  | -5.931412649 |
| H267 | -4.228540629  | 6.244268741  | -2.095049057 |
| H268 | -6.719892573  | 1.361271237  | -4.386680351 |
| H269 | 2.033465057   | 10.346841481 | -3.932091372 |
| H270 | -2.110940456  | 5.816963150  | -8.409172554 |
| H271 | -4.898937184  | 7.037197555  | -6.735475011 |
| H272 | -3.601740874  | -4.966782551 | -3.442141095 |
| H273 | -4.688822322  | -4.345533441 | -1.040966258 |
| H274 | -8.557029120  | 8.704111071  | -1.933424961 |
| H275 | -5.252604279  | 0.042972336  | -2.661424972 |
| H276 | -0.644553662  | 6.811885491  | -5.272948460 |
| H277 | -0.949563370  | 4.700674954  | -7.222217044 |
| H278 | 0.020965642   | 2.980125529  | -5.413920137 |
| H279 | -3.304455774  | 4.292470147  | -5.374591030 |
| H280 | -1.223083272  | 9.820351368  | 0.928998823  |
| H281 | -2.122322097  | 9.857949311  | -2.263738811 |
| H282 | -2.505269057  | 12.760194180 | -2.401838108 |

|      |              |               |              |
|------|--------------|---------------|--------------|
| H283 | 0.238499913  | 10.394160945  | 0.096137846  |
| H284 | -4.379900427 | 10.292490347  | -1.068731687 |
| H285 | 6.898463985  | -3.096286015  | -7.590208111 |
| H286 | 7.032878723  | -4.400477788  | -6.396424502 |
| H287 | 9.462250723  | -3.890676727  | -2.212930859 |
| H288 | 7.944544805  | -5.151290213  | -8.469217622 |
| H289 | 6.509889990  | -5.924571094  | -8.306250758 |
| H290 | 4.746944842  | 6.035811481   | -0.529800418 |
| H291 | 4.096146341  | 9.002829314   | 0.182613830  |
| H292 | 4.204412301  | 8.389885278   | -4.043617364 |
| H293 | 3.114349521  | 6.712886464   | -0.236700640 |
| H294 | 5.307098041  | 9.574906079   | -0.756868784 |
| H295 | 5.535714168  | 3.292476255   | -5.948672990 |
| H296 | 5.207525138  | 7.747523371   | -2.223068689 |
| H297 | 5.198800824  | -4.504111333  | 6.995583738  |
| H298 | 7.579872382  | -5.545834397  | 5.370198994  |
| H299 | 4.576570429  | 1.163608013   | -6.334599805 |
| H300 | 3.872224654  | 1.621383067   | 3.589398343  |
| H301 | 2.036179932  | 0.346975935   | -8.592505707 |
| H302 | 0.313229923  | -3.102157334  | -3.845496141 |
| H303 | 1.292817761  | 0.977748853   | -7.126494097 |
| H304 | 3.959973281  | -2.473434971  | 5.722692805  |
| H305 | 3.345863718  | -0.376224178  | -5.981647773 |
| H306 | 4.199644898  | -3.348448994  | 4.208854324  |
| H307 | 5.155229841  | -5.218986854  | 5.369131156  |
| H308 | 6.685421696  | -3.295641935  | 4.580282429  |
| H309 | 6.429342707  | -2.526406417  | 6.156960610  |
| H310 | -3.369825466 | -2.951316038  | -6.819604353 |
| H311 | 6.230537793  | -6.730509009  | 7.772694475  |
| H312 | 5.983425213  | -9.585639814  | 6.649462576  |
| H313 | 1.150067841  | -0.754351749  | -3.713197096 |
| H314 | 6.854171763  | -8.675589072  | 9.281190015  |
| H315 | 5.457065902  | -9.405299432  | 8.839082123  |
| H316 | 5.349923183  | -1.465822928  | 3.270858605  |
| H317 | 0.059986820  | 1.015459742   | -5.035719115 |
| H318 | -1.581048662 | -3.661604812  | -5.359213467 |
| H319 | 9.383648171  | -8.092250742  | 1.992054449  |
| H320 | 8.672184772  | -6.608535616  | -1.042776427 |
| H321 | 7.736022003  | -6.459582002  | 2.757252562  |
| H322 | 9.012123968  | -9.111890222  | 0.896382657  |
| H323 | 6.227523827  | 2.199644106   | -8.687131705 |
| H324 | 7.158415852  | -3.480470638  | 1.803424549  |
| H325 | 3.496086865  | -6.249073534  | 2.756582144  |
| H326 | 5.137691690  | -2.227837534  | -6.435288369 |
| H327 | 4.662977001  | -8.119763771  | 1.508048274  |
| H328 | 5.896508485  | -6.934408709  | -5.033916183 |
| H329 | 4.400598152  | -5.363548542  | -3.699103696 |
| H330 | 7.604666431  | -9.743584470  | 7.335683499  |
| H331 | 4.664498263  | 0.519458023   | 2.503033664  |
| H332 | 8.969834918  | -3.668175662  | 3.382575217  |
| H333 | 7.751709017  | -2.044594308  | 1.826616382  |
| H334 | 9.238862850  | -4.145028403  | 5.698281658  |
| H335 | 3.804697939  | -0.508749257  | 6.364850000  |
| H336 | 5.505272407  | -11.155385905 | -0.771452924 |
| H337 | 5.561277984  | -7.664725293  | -1.385053867 |
| H338 | 6.637628210  | -7.419253024  | 0.005982023  |
| H339 | 3.633753584  | -8.088639020  | 0.048532804  |
| H340 | 3.062222636  | -2.592950861  | -5.260434350 |
| H341 | -1.843966683 | 0.465144369   | -6.579602977 |
| H342 | -3.629000855 | -1.238732735  | -7.236375258 |
| H343 | 2.996650220  | -4.809687889  | 1.807597933  |

|       |               |              |              |
|-------|---------------|--------------|--------------|
| H344  | 9.320923965   | -5.165463141 | 3.609657893  |
| H345  | 8.405316947   | -7.208157649 | 3.946262310  |
| H346  | 3.018501668   | 0.850401920  | 5.657108335  |
| H347  | 8.224739751   | -7.164511496 | -3.979518460 |
| H348  | 7.968308171   | -5.062028500 | -0.550204145 |
| H349  | 2.606990710   | -3.786600805 | -6.512174853 |
| H350  | 4.529982430   | 3.979560114  | -7.249843085 |
| H351  | 5.983143835   | 2.189988126  | 5.474937482  |
| H352  | 6.483867657   | 2.386548135  | 3.776528151  |
| H353  | 11.231321197  | -5.075428257 | -3.182517343 |
| H354  | 10.794472780  | -6.498815700 | -2.502364194 |
| H355  | 11.837493903  | -6.381772372 | 1.926437226  |
| H356  | 10.289907779  | -6.489348848 | 0.252888282  |
| H357  | 13.387741947  | -5.276968729 | -0.061534390 |
| H358  | 11.312561536  | -4.696199782 | 2.139946265  |
| H359  | 9.147877344   | 2.514640605  | 4.551315622  |
| H360  | -5.813123758  | 12.743746708 | 0.433634389  |
| H361  | 9.804240728   | -3.499019556 | 8.582204960  |
| H362  | 9.112426327   | -1.409065608 | 6.925013745  |
| H363  | -7.012262989  | 11.144536341 | -1.840772435 |
| H364  | -6.072162392  | 9.665207510  | 0.691181651  |
| H365  | -7.755143269  | 9.844974329  | 0.162784474  |
| H366  | -6.853682139  | 5.204574858  | -4.280449726 |
| H367  | 0.630020237   | -1.270256470 | 0.594642469  |
| H368  | -1.133465882  | -0.402697888 | -1.064885728 |
| Mo369 | 4.922507633   | -3.650858789 | -0.910953663 |
| N370  | -5.119553434  | -8.322723623 | -0.444967408 |
| N371  | -7.942157968  | -6.092457439 | 0.569697047  |
| N372  | -8.271519396  | -5.946070808 | 3.381005928  |
| N373  | -5.688685200  | -6.420266675 | 4.372507614  |
| N374  | -4.265273370  | -4.165743621 | 3.300733988  |
| N375  | -5.622161669  | -2.081089321 | 4.689462129  |
| N376  | -5.358042826  | -2.771385949 | 7.495767342  |
| N377  | -2.662220508  | -3.617079321 | 8.031155766  |
| N378  | -0.902977269  | -1.888809341 | 6.763642755  |
| N379  | -1.780746526  | 0.947347348  | 6.442734691  |
| N380  | -3.109232851  | 1.284108512  | 9.013979650  |
| N381  | 6.137913935   | -8.700834858 | 8.552395188  |
| N382  | 6.755124004   | -6.676922373 | 6.892780969  |
| N383  | 4.873832976   | -1.376959699 | 4.173440866  |
| N384  | 3.531411206   | -0.015629863 | 5.521448702  |
| N385  | 4.093936213   | 0.653278504  | 3.364040551  |
| N386  | 9.076108592   | -4.047532991 | 6.724371279  |
| N387  | -4.464738515  | -4.454267050 | -3.182256491 |
| N388  | -0.046565327  | -5.965179644 | -2.241054694 |
| N389  | -5.320061151  | -1.973000072 | -3.116879217 |
| N390  | -7.958774435  | -1.462796913 | -2.476560413 |
| N391  | -7.863118809  | -0.994890552 | 0.249431698  |
| N392  | -6.140168303  | 1.188933619  | 0.761525298  |
| N393  | -3.101804815  | 1.824667847  | -2.167762272 |
| N394  | -1.936598499  | 0.267626998  | -1.212772519 |
| N395  | -7.421619567  | 3.641561086  | 0.598298969  |
| N396  | -10.775522079 | 5.531353724  | -2.137718878 |
| N397  | -11.433855067 | 7.448373371  | -1.234052108 |
| N398  | 7.847617844   | 4.701222153  | 4.122165123  |
| N399  | 4.891280917   | 8.711753072  | -0.395411327 |
| N400  | 3.377778566   | 8.773602512  | -3.593373499 |
| N401  | 1.169772300   | 7.265974854  | -4.399810166 |
| N402  | -2.742324142  | 4.745326482  | -6.118278827 |
| N403  | -2.685745673  | 6.381277949  | -7.793211294 |
| N404  | -4.309773650  | 6.461013869  | -6.140690711 |

|      |               |              |              |
|------|---------------|--------------|--------------|
| N405 | -0.143064395  | 6.282285475  | -2.049916430 |
| N406 | -0.664517830  | 8.716358237  | -0.757596150 |
| N407 | -2.284938674  | 10.776914151 | -1.849233081 |
| N408 | -2.773747446  | 9.165581598  | -4.659811978 |
| N409 | -4.976090151  | 11.072728089 | -1.332996197 |
| N410 | 6.932309350   | -5.007644056 | -8.479129661 |
| N411 | 4.521169768   | -3.002480232 | -6.704279873 |
| N412 | 2.779450681   | -0.493794725 | -6.845342779 |
| N413 | 4.308639565   | 1.925412010  | -6.970826924 |
| N414 | 1.114775347   | -4.756408888 | -9.432065640 |
| N415 | -1.097327863  | -3.148819843 | -8.523159209 |
| N416 | 10.419335098  | -5.622498259 | -2.880889229 |
| N417 | 6.105807048   | -5.150508119 | -2.406893173 |
| N418 | 6.196147368   | -6.441989699 | -4.196940607 |
| N419 | 10.827315025  | -5.623227963 | 0.281737369  |
| N420 | 0.039858300   | 1.805111649  | 0.396827365  |
| N421 | 0.947384853   | 1.418255578  | -0.158646510 |
| O422 | -5.763012484  | -6.080967992 | 1.231857317  |
| O423 | -7.674337252  | -3.748827484 | 3.287517012  |
| O424 | -6.290918068  | -5.405314251 | 6.331683523  |
| O425 | -2.993475790  | -4.272499204 | 5.182748481  |
| O426 | -3.702395214  | -0.866174165 | 4.550793707  |
| O427 | -5.181399252  | -0.522300151 | 7.851082000  |
| O428 | -2.980544797  | -3.036975055 | 10.229480416 |
| O429 | 0.919878078   | -2.910931683 | 7.723388447  |
| O430 | 0.413863223   | 1.254571752  | 7.002242210  |
| O431 | -1.815855014  | 3.142377310  | 9.172069906  |
| O432 | -2.026265561  | 1.751012796  | 12.401211593 |
| O433 | 7.902051893   | -8.049372763 | 5.424624679  |
| O434 | 7.709419992   | -4.546596795 | 8.504771007  |
| O435 | 11.051703270  | -1.146069528 | 7.498606388  |
| O436 | -5.192868413  | -1.776504307 | -0.834181964 |
| O437 | -1.900849947  | -5.645241670 | -3.518057810 |
| O438 | -7.756602848  | 0.748110588  | -3.030781371 |
| O439 | -5.890525203  | 1.244681133  | -4.920602429 |
| O440 | -10.120560595 | -0.557083376 | 0.307137004  |
| O441 | -6.772318873  | 1.202246114  | 2.955375916  |
| O442 | -5.779641429  | 4.595536250  | 1.871503306  |
| O443 | -8.908491330  | 6.327319975  | 2.368794708  |
| O444 | 8.754737561   | 2.288040795  | 6.542430386  |
| O445 | 1.604990683   | 6.148282137  | 3.606207355  |
| O446 | 2.221824554   | 9.043922282  | -1.649192230 |
| O447 | 0.088355161   | 9.159260331  | -5.125541318 |
| O448 | -2.058696209  | 6.266041209  | -3.303221141 |
| O449 | -2.331838921  | 7.716709492  | 0.458406746  |
| O450 | 0.913350638   | 6.500211018  | 0.815926876  |
| O451 | -1.616548427  | 12.225023122 | -0.206590410 |
| O452 | -5.114827404  | 12.980827364 | -2.575446902 |
| O453 | -4.829174947  | 10.160355699 | -4.651959787 |
| O454 | -7.831020604  | 12.683078332 | 0.118851062  |
| O455 | -6.009338544  | 5.401569174  | -3.830675460 |
| O456 | 4.427280266   | -5.218289730 | -7.311893091 |
| O457 | 1.664245000   | -2.042398411 | -8.113400721 |
| O458 | 2.708070781   | 2.864196472  | -8.308251433 |
| O459 | 7.248379018   | 3.797492725  | -7.927675854 |
| O460 | -2.358685926  | -4.999630212 | -8.959749385 |
| O461 | 1.206424128   | -7.436187056 | -4.704816087 |
| O462 | 3.043912309   | -6.359156704 | -5.364496780 |
| O463 | -2.489132756  | 0.075571711  | -9.124650986 |
| O464 | 11.282241946  | -3.554063143 | -0.518887211 |
| O465 | 13.883863330  | -4.390765630 | 1.709162585  |

|  |                       |              |               |              |
|--|-----------------------|--------------|---------------|--------------|
|  | O466                  | 1.016078572  | -6.062487802  | 0.638530119  |
|  | O467                  | 1.633941702  | -7.803409479  | 1.875579763  |
|  | O468                  | 7.237589904  | -9.879043857  | 0.001917806  |
|  | O469                  | 5.159373251  | -10.237909395 | -0.807058022 |
|  | O470                  | 6.162319842  | -4.579278366  | 0.752503614  |
|  | O471                  | 6.073174895  | -6.108396795  | 2.408776229  |
|  | O472                  | 4.017503329  | -5.489305115  | -0.470045571 |
|  | O473                  | 9.556797646  | -4.253327728  | 3.925611084  |
|  | O474                  | 7.636872993  | -2.835559385  | 2.387756000  |
|  | O475                  | -4.353768311 | 3.387399584   | -4.175796301 |
|  | O476                  | 9.789662012  | -8.733527215  | 1.355608496  |
|  | O477                  | 8.629444943  | -6.759370573  | 3.089824793  |
|  | S478                  | 3.182575492  | 5.490803933   | -2.322563820 |
|  | S479                  | 2.329132344  | 1.894027733   | -3.067274705 |
|  | S480                  | 3.305825173  | -3.135902438  | -2.610615822 |
|  | S481                  | 3.500988806  | 2.651676276   | 0.240195315  |
|  | S482                  | 0.755871268  | -1.622723092  | -0.717989611 |
|  | S483                  | 5.162520631  | -0.467813596  | -4.584224158 |
|  | S484                  | 3.894323596  | -2.430591375  | 0.927041424  |
|  | S485                  | 5.793721228  | 2.563704375   | -2.363380768 |
|  | S486                  | 6.734530259  | -2.214819455  | -1.491703132 |
|  | S487                  | 6.395198951  | 0.469226155   | 1.044903999  |
|  | <b>7u(b)</b>          |              |               |              |
|  | Fe1                   | 3.10         |               |              |
|  | Fe2                   | 0.67         |               |              |
|  | Fe3                   | -2.53        |               |              |
|  | Fe4                   | 2.81         |               |              |
|  | Fe5                   | -2.36        |               |              |
|  | Fe6                   | -0.55        |               |              |
|  | Fe7                   | 2.35         |               |              |
|  | S=2                   |              |               |              |
|  | bm2cnx2b2n2x35a.car_4 |              |               |              |
|  | C1                    | -6.677352927 | -6.604374045  | 0.582095947  |
|  | C2                    | -6.488680718 | -7.909210981  | -0.199109094 |
|  | C3                    | -8.229093212 | -4.803903935  | 1.196464098  |
|  | C4                    | -8.029587426 | -4.781010579  | 2.709941220  |
|  | C5                    | -8.074686596 | -6.020846573  | 4.814334555  |
|  | C6                    | -6.606510616 | -5.911855955  | 5.240511276  |
|  | C7                    | -4.266397682 | -6.259427777  | 4.598063045  |
|  | C8                    | -3.779058305 | -4.821736307  | 4.396306358  |
|  | C9                    | -3.904817808 | -2.776057490  | 3.080276457  |
|  | C10                   | -4.394194805 | -1.830624053  | 4.188165223  |
|  | C11                   | -6.154193587 | -1.238724459  | 5.754632119  |
|  | C12                   | -5.512502770 | -1.480126975  | 7.127182641  |
|  | C13                   | -4.942013265 | -3.120574460  | 8.851690431  |
|  | C14                   | -3.433603126 | -3.239276711  | 9.100269642  |
|  | C15                   | -1.239793922 | -3.856127376  | 8.178891880  |
|  | C16                   | -0.305978805 | -2.827344545  | 7.534852722  |
|  | C17                   | -0.167731432 | -0.882831453  | 6.001435207  |
|  | C18                   | -0.481040558 | 0.532725755   | 6.519932782  |
|  | C19                   | -0.371828915 | -1.041830246  | 4.471307522  |
|  | C20                   | 0.259916540  | 0.109415616   | 3.680440982  |
|  | C21                   | 0.167304581  | -2.395359987  | 3.993449248  |
|  | C22                   | -2.197620677 | 2.256193431   | 6.923969443  |
|  | C23                   | -2.355268830 | 2.261676754   | 8.458252114  |
|  | C24                   | -3.469936717 | 2.744644709   | 6.192162869  |
|  | C25                   | -3.984394692 | 4.057954551   | 6.796234286  |
|  | C26                   | -3.205710004 | 2.913590215   | 4.690551065  |
|  | C27                   | -3.367957010 | 1.276596115   | 10.430070000 |
|  | C28                   | -2.090720117 | 1.319333953   | 11.245021518 |
|  | C29                   | 6.735267690  | -9.060088627  | 7.261657103  |
|  | C30                   | 7.196791424  | -7.858918993  | 6.437010170  |
|  | C31                   | 7.067084449  | -5.365613045  | 6.319945270  |
|  | C32                   | 7.989871159  | -4.602953619  | 7.289891029  |
|  | C33                   | 5.763509368  | -4.592886956  | 6.051052936  |
|  | C34                   | 5.985461321  | -3.214882977  | 5.424337724  |
|  | C35                   | 4.673157055  | -2.638086009  | 4.896451253  |
|  | C36                   | 4.182490819  | -0.240360392  | 4.366746303  |
|  | C37                   | 10.071856579 | -3.331592154  | 7.510701338  |



|     |               |              |              |
|-----|---------------|--------------|--------------|
| C38 | 10.086665654  | -1.837487577 | 7.273183162  |
| C39 | -4.255655758  | -3.788604305 | -1.898724536 |
| C40 | -4.967390700  | -2.425710495 | -1.888918971 |
| C41 | -2.763710626  | -3.539302761 | -1.587864094 |
| C42 | -1.924260861  | -4.786238745 | -1.241244796 |
| C43 | -1.284579365  | -5.493816655 | -2.433843290 |
| C44 | -5.802282257  | -0.632862215 | -3.345053994 |
| C45 | -7.269986653  | -0.408083560 | -2.953414666 |
| C46 | -5.544654779  | -0.147569232 | -4.785641630 |
| C47 | -9.221245136  | -1.326326003 | -1.790365309 |
| C48 | -9.105919804  | -0.916350234 | -0.313080006 |
| C49 | -7.618799269  | -0.608059625 | 1.622853953  |
| C50 | -6.796187934  | 0.662513580  | 1.843557754  |
| C51 | -5.338245410  | 2.400982884  | 0.912463284  |
| C52 | -6.208963455  | 3.646718629  | 1.209846743  |
| C53 | -4.561264693  | 2.738602473  | -0.369155097 |
| C54 | -3.540150880  | 1.754353978  | -0.847836520 |
| C55 | -2.802968050  | 0.766753948  | -0.242104202 |
| C56 | -2.122835884  | 0.904932879  | -2.349490853 |
| C57 | -8.291382446  | 4.814630931  | 0.571846988  |
| C58 | -8.667683335  | 5.199413895  | 2.000569693  |
| C59 | -9.555564475  | 4.445566345  | -0.242656211 |
| C60 | -10.338057035 | 5.594487600  | -0.807823574 |
| C61 | -10.755226990 | 6.776874091  | -0.226414604 |
| C62 | -11.430093208 | 6.672976956  | -2.334859177 |
| C63 | 7.429367223   | 3.759440087  | 5.155797619  |
| C64 | 8.548762125   | 2.774377629  | 5.438384738  |
| C65 | 6.214756782   | 2.925357672  | 4.675209317  |
| C66 | 4.988558908   | 3.768958045  | 4.410678586  |
| C67 | 4.039897972   | 4.018259607  | 5.419680682  |
| C68 | 4.768471234   | 4.341446450  | 3.145746987  |
| C69 | 2.906703659   | 4.802006761  | 5.174088133  |
| C70 | 3.650375431   | 5.135812514  | 2.889434865  |
| C71 | 2.717205304   | 5.360041120  | 3.905034082  |
| C72 | 4.379510860   | 7.924712013  | -1.523570840 |
| C73 | 3.230032210   | 8.630495617  | -2.253650936 |
| C74 | 3.903698987   | 6.561378923  | -1.007395047 |
| C75 | 2.354022850   | 9.408513335  | -4.414016524 |
| C76 | 1.093338488   | 8.580168492  | -4.666038638 |
| C77 | 0.023653546   | 6.358318132  | -4.522709164 |
| C78 | -0.817583069  | 6.294959854  | -3.229845237 |
| C79 | 0.516538929   | 4.976429071  | -4.988999557 |
| C80 | -0.547055023  | 3.901142247  | -5.231623704 |
| C81 | -1.470552086  | 4.095525519  | -6.448622978 |
| C82 | -3.247857352  | 5.830654999  | -6.688200273 |
| C83 | -0.887765559  | 6.249463251  | -0.793824383 |
| C84 | -1.369290315  | 7.635433144  | -0.321142038 |
| C85 | -0.100109021  | 5.598632628  | 0.351031870  |
| C86 | -0.768371434  | 9.991906819  | -0.067022066 |
| C87 | -1.583836181  | 11.101592011 | -0.725546798 |
| C88 | -3.004226459  | 11.798577639 | -2.611806446 |
| C89 | -4.471709319  | 12.001784784 | -2.176591770 |
| C90 | -2.915894110  | 11.539374639 | -4.132549219 |
| C91 | -3.598291257  | 10.236076016 | -4.530699809 |
| C92 | -6.379769080  | 11.066689716 | -0.943972477 |
| C93 | -6.702031720  | 12.270491980 | -0.064863697 |
| C94 | -6.723538103  | 9.750797338  | -0.195162291 |
| C95 | -6.571788742  | 8.539615257  | -1.086778475 |
| C96 | -7.608060544  | 8.162686948  | -1.956517764 |
| C97 | -5.377337941  | 7.801663695  | -1.119623591 |
| C98 | -7.451286779  | 7.103659791  | -2.854338750 |

|       |              |              |              |
|-------|--------------|--------------|--------------|
| C99   | -5.190976890 | 6.757116610  | -2.031457307 |
| C100  | -6.233210112 | 6.423178065  | -2.893768365 |
| C101  | 6.580867686  | -4.128624989 | -7.366960964 |
| C102  | 5.081523353  | -4.157386118 | -7.126811756 |
| C103  | 3.131417416  | -2.841782747 | -6.327232055 |
| C104  | 2.454269003  | -1.759891754 | -7.173309008 |
| C105  | 2.256475108  | 0.651663312  | -7.554158677 |
| C106  | 3.130937847  | 1.899078992  | -7.644221815 |
| C107  | 5.153429171  | 3.105472130  | -6.973876855 |
| C108  | 6.314546221  | 3.019224194  | -7.943949833 |
| C109  | 0.017708715  | -5.339455107 | -8.647534922 |
| C110  | -1.252967634 | -4.486091996 | -8.738077843 |
| C111  | 0.320681060  | -5.662242715 | -7.166529698 |
| C112  | 1.337395360  | -6.810399060 | -7.037877190 |
| C113  | 1.838826267  | -6.915747387 | -5.615842757 |
| C114  | -2.247502671 | -2.258466344 | -8.524772033 |
| C115  | -1.939540751 | -1.004291055 | -9.319747644 |
| C116  | -2.853532424 | -2.004896751 | -7.122451199 |
| C117  | -1.812139083 | -1.642119342 | -6.092670280 |
| C118  | -1.337884391 | -0.324740942 | -5.963908310 |
| C119  | -1.228022346 | -2.645245826 | -5.299006711 |
| C120  | -0.281231124 | -0.033726884 | -5.092959682 |
| C121  | -0.172684499 | -2.352480561 | -4.427983003 |
| C122  | 0.315439649  | -1.045953572 | -4.332845036 |
| C123  | 9.700555015  | -4.879924585 | -1.812840256 |
| C124  | 10.628413091 | -4.613897188 | -0.615968984 |
| C125  | 8.392513891  | -5.571410992 | -1.392392520 |
| C126  | 7.352463108  | -5.719384790 | -2.462113062 |
| C127  | 7.406920362  | -6.525612377 | -3.581266828 |
| C128  | 5.406177106  | -5.587309888 | -3.447856773 |
| C129  | 11.718669243 | -5.419029591 | 1.404979523  |
| C130  | 13.089980546 | -4.954592929 | 0.967212854  |
| C131  | 1.842032524  | -6.539443413 | 1.380075661  |
| C132  | 3.134116810  | -5.879801597 | 1.768234480  |
| C133  | 4.291477123  | -6.114802984 | 0.715089295  |
| C134  | 4.504416228  | -7.641160906 | 0.510258158  |
| C135  | 5.738658313  | -7.953198973 | -0.351767354 |
| C136  | 6.127396380  | -9.405574509 | -0.353176065 |
| C137  | 5.592276485  | -5.558327053 | 1.372748061  |
| C138  | 4.160261826  | -0.206906992 | -1.399348639 |
| Fe139 | 4.951969371  | -1.548486553 | -2.660346287 |
| Fe140 | 2.550992266  | 0.943686075  | -0.969805298 |
| Fe141 | 5.144850469  | 1.363569897  | -0.516381623 |
| Fe142 | 4.359436446  | 0.955570902  | -2.996307240 |
| Fe143 | 3.794234585  | 3.304699417  | -1.773284628 |
| Fe144 | 5.390974166  | -1.124587144 | -0.107093092 |
| Fe145 | 3.012003894  | -1.696566115 | -0.951466717 |
| H146  | -4.596789700 | -8.322742369 | 0.441703947  |
| H147  | -4.643652455 | -7.633359358 | -1.038146620 |
| H148  | -8.633384978 | -6.496394727 | -0.047380972 |
| H149  | -7.025236284 | -7.838326504 | -1.158582654 |
| H150  | -7.000528186 | -8.697299832 | 0.379869835  |
| H151  | -7.590574481 | -4.007151958 | 0.789492861  |
| H152  | -8.585399511 | -6.752566625 | 2.854795866  |
| H153  | -9.275472878 | -4.546147856 | 0.983144328  |
| H154  | -8.475970934 | -6.981605114 | 5.163031832  |
| H155  | -6.004477016 | -6.701512484 | 3.443893436  |
| H156  | -8.616740613 | -5.214458965 | 5.324625011  |
| H157  | -2.814591553 | -2.658283673 | 3.023837720  |
| H158  | -4.847965028 | -4.661557749 | 2.631242739  |
| H159  | -3.729774200 | -6.924799021 | 3.908341849  |

|      |              |              |               |
|------|--------------|--------------|---------------|
| H160 | -5.997927468 | -0.182077887 | 5.502631402   |
| H161 | -6.215435356 | -2.814954011 | 4.288977208   |
| H162 | -4.013667757 | -6.545115958 | 5.626064672   |
| H163 | -4.334073145 | -2.464517058 | 2.116718702   |
| H164 | -5.714771117 | -3.530427934 | 6.904628835   |
| H165 | -7.234474622 | -1.422492306 | 5.834258289   |
| H166 | -0.303946288 | -3.230753651 | 4.530624507   |
| H167 | -0.033775771 | -2.529013201 | 2.919490200   |
| H168 | 1.257657720  | -2.458256013 | 4.136190607   |
| H169 | -1.458591609 | -1.020296206 | 4.288657162   |
| H170 | -5.397327207 | -4.084442008 | 9.121880530   |
| H171 | -2.881973845 | 1.975352820  | 4.217585420   |
| H172 | -3.640623664 | 0.619749977  | 8.418980192   |
| H173 | -4.270752483 | 3.945200808  | 7.852308698   |
| H174 | 0.020827804  | 0.004298551  | 2.611831760   |
| H175 | 1.355571855  | 0.107140798  | 3.765816947   |
| H176 | 7.151878901  | 4.235162411  | 6.116757727   |
| H177 | -4.123605654 | 3.249097022  | 4.185874967   |
| H178 | -4.867547714 | 4.402110997  | 6.239271745   |
| H179 | -2.426049256 | 3.673286614  | 4.519667841   |
| H180 | -3.216070770 | 4.844500102  | 6.735425480   |
| H181 | -4.252539436 | 1.976480020  | 6.327416117   |
| H182 | -1.376381270 | 2.961640330  | 6.727779145   |
| H183 | -2.468634119 | 0.354490585  | 5.958747158   |
| H184 | -0.111502682 | 1.093225543  | 4.003835327   |
| H185 | 0.335905921  | 4.648973299  | -0.004456058  |
| H186 | -0.819814287 | 5.374842721  | 1.154507539   |
| H187 | 1.091187454  | 6.294840252  | 1.752826371   |
| H188 | 1.019320431  | 6.180466061  | 4.365924749   |
| H189 | 3.480755105  | 5.550740413  | 1.894996715   |
| H190 | 5.465492556  | 4.134148830  | 2.330219666   |
| H191 | 4.182225994  | 3.588366962  | 6.415500638   |
| H192 | -1.910544760 | -1.973229661 | 6.611693734   |
| H193 | -0.984380820 | -4.835363551 | 7.746646594   |
| H194 | -1.001021166 | -3.884023180 | 9.250182358   |
| H195 | -3.103886969 | -3.882474702 | 7.151504279   |
| H196 | -5.309074984 | -2.360557937 | 9.552657167   |
| H197 | 2.171624902  | 4.971617151  | 5.965643173   |
| H198 | 0.890279769  | -1.045688759 | 6.245894592   |
| H199 | -4.017160790 | 2.110395502  | 10.744840108  |
| H200 | -3.877370168 | 0.333115103  | 10.682686038  |
| H201 | -1.200209518 | 0.864119807  | 10.751529329  |
| H202 | 11.081161563 | -3.736917284 | 7.340784291   |
| H203 | 0.427973194  | -6.464138201 | -3.002249124  |
| H204 | 2.369169055  | -8.043993091 | 2.466040085   |
| H205 | 0.849356914  | -7.758882090 | -7.305779551  |
| H206 | 2.179492153  | -6.649762758 | -7.726522319  |
| H207 | -0.606375079 | -5.947284687 | -6.645426055  |
| H208 | -1.216363184 | -1.159454015 | -10.154905170 |
| H209 | -0.267087575 | -6.281507151 | -9.139628077  |
| H210 | -2.308178727 | -3.005273809 | -2.436913110  |
| H211 | -2.548365482 | -5.530760329 | -0.716310425  |
| H212 | -0.173592736 | -2.765025707 | -8.309582280  |
| H213 | -3.017150293 | -2.777438315 | -9.129234653  |
| H214 | 1.537443205  | -3.956787582 | -8.947859254  |
| H215 | 0.456916779  | -5.834078496 | -1.356197666  |
| H216 | 0.693103073  | -4.750285280 | -6.674247157  |
| H217 | 1.850503753  | -5.450227545 | -9.569175985  |
| H218 | -5.223253657 | -5.127477280 | -3.137618665  |
| H219 | -2.724854897 | -2.860290177 | -0.723296850  |
| H220 | 3.453818968  | -5.939343520 | -6.178556143  |

|      |               |              |              |
|------|---------------|--------------|--------------|
| H221 | -1.135723876  | -4.492825593 | -0.534068401 |
| H222 | -4.655003529  | 2.291426929  | 1.767848643  |
| H223 | -2.799521561  | 0.413093043  | 0.781534599  |
| H224 | -8.591978146  | -0.438957630 | 2.101363352  |
| H225 | -7.072003990  | -1.356365522 | -0.300531947 |
| H226 | -7.723742157  | 2.793439494  | 0.130237576  |
| H227 | -10.607003964 | 7.199493164  | 0.761467740  |
| H228 | -8.771988339  | 4.327857276  | 2.691736528  |
| H229 | -10.198738898 | 3.789658751  | 0.370584290  |
| H230 | -7.774310042  | 5.666449646  | 0.102349203  |
| H231 | -11.909506179 | 6.974719764  | -3.263435537 |
| H232 | -4.056629320  | 3.701112220  | -0.185122636 |
| H233 | -5.282961386  | 2.919726897  | -1.182628058 |
| H234 | -11.873400815 | 8.366016435  | -1.121477642 |
| H235 | -9.228880340  | 3.841641781  | -1.103667103 |
| H236 | -6.032671543  | 0.618156628  | -0.075662165 |
| H237 | -7.132539978  | -1.428775941 | 2.170803794  |
| H238 | -9.829938271  | -0.560567799 | -2.287840595 |
| H239 | -1.575418854  | 0.719641258  | -3.268895327 |
| H240 | -9.768801391  | -2.276864344 | -1.840808952 |
| H241 | 8.510037057   | 5.381044929  | 4.521145613  |
| H242 | 7.059434514   | 5.233605942  | 3.785293595  |
| H243 | 0.879239171   | 6.103443002  | -2.038564341 |
| H244 | -1.799859908  | 5.657053299  | -0.958073219 |
| H245 | 0.231959488   | 8.542261024  | -1.230158096 |
| H246 | -3.485483458  | 2.451265209  | -2.899481598 |
| H247 | -4.901832650  | 2.623470605  | -4.535026229 |
| H248 | -5.004852142  | 4.054682116  | -3.852310470 |
| H249 | -4.475808821  | -0.250696321 | -5.017230645 |
| H250 | -6.119627863  | -0.760855300 | -5.499835694 |
| H251 | -1.855808529  | 11.548267128 | -4.425981124 |
| H252 | -3.430134434  | 12.365784572 | -4.639505195 |
| H253 | -1.753632429  | 9.230163289  | -4.727105283 |
| H254 | -3.200605028  | 8.255550597  | -4.837693134 |
| H255 | -3.087859809  | 7.224903495  | -8.177168483 |
| H256 | -1.698488573  | 3.120392412  | -6.905323804 |
| H257 | -8.273947291  | 6.808137479  | -3.510396093 |
| H258 | -4.561326235  | 8.030147232  | -0.427488237 |
| H259 | -4.767089813  | 6.062991396  | -5.310519790 |
| H260 | 1.222785658   | 4.579950988  | -4.242118637 |
| H261 | 2.017027593   | 6.882487444  | -3.949674067 |
| H262 | -1.154788495  | 3.741535605  | -4.327301496 |
| H263 | -7.492584246  | -2.377175997 | -2.506113914 |
| H264 | 2.787779944   | 9.664455426  | -5.390132238 |
| H265 | -5.084944831  | -2.653425684 | -3.871707950 |
| H266 | 1.092017095   | 5.130578795  | -5.917072289 |
| H267 | -4.231061141  | 6.239801618  | -2.090590997 |
| H268 | -6.722712534  | 1.353427369  | -4.392233447 |
| H269 | 2.021980887   | 10.342719702 | -3.939959681 |
| H270 | -2.098851098  | 5.826514368  | -8.393777268 |
| H271 | -4.890636840  | 7.046165879  | -6.724780275 |
| H272 | -3.589671317  | -4.969667832 | -3.445501074 |
| H273 | -4.683918313  | -4.351704485 | -1.048226786 |
| H274 | -8.558314180  | 8.702304828  | -1.936389892 |
| H275 | -5.247631914  | 0.038034725  | -2.667355358 |
| H276 | -0.645135056  | 6.798513287  | -5.274631502 |
| H277 | -0.951660006  | 4.689314982  | -7.212011306 |
| H278 | 0.005489251   | 2.965956102  | -5.392789839 |
| H279 | -3.313230022  | 4.286501889  | -5.372338834 |
| H280 | -1.219670164  | 9.823246024  | 0.922324333  |
| H281 | -2.131014500  | 9.856356209  | -2.264319692 |

|      |              |               |              |
|------|--------------|---------------|--------------|
| H282 | -2.512042562 | 12.759854252  | -2.403774871 |
| H283 | 0.241916433  | 10.394833345  | 0.087679154  |
| H284 | -4.381655135 | 10.294134159  | -1.063235853 |
| H285 | 6.907018442  | -3.102878534  | -7.590382352 |
| H286 | 7.044131039  | -4.410164012  | -6.398377769 |
| H287 | 9.461524595  | -3.886654086  | -2.219122277 |
| H288 | 7.944651310  | -5.154868912  | -8.481286253 |
| H289 | 6.514124187  | -5.931688470  | -8.305015315 |
| H290 | 4.754364100  | 6.059505009   | -0.528339680 |
| H291 | 4.084574070  | 8.997066201   | 0.188838852  |
| H292 | 4.198697279  | 8.388991666   | -4.051980013 |
| H293 | 3.105122468  | 6.709712779   | -0.266883587 |
| H294 | 5.295423651  | 9.586427891   | -0.740627582 |
| H295 | 5.538339221  | 3.292470418   | -5.959837872 |
| H296 | 5.214825930  | 7.769427101   | -2.224492995 |
| H297 | 5.203967438  | -4.499518854  | 6.996831566  |
| H298 | 7.584477282  | -5.538472683  | 5.368747047  |
| H299 | 4.586064079  | 1.157117110   | -6.348274904 |
| H300 | 3.872474974  | 1.626950352   | 3.607831916  |
| H301 | 2.027995501  | 0.340060083   | -8.582207413 |
| H302 | 0.284304942  | -3.142797365  | -3.827829832 |
| H303 | 1.301228770  | 0.976000359   | -7.109252553 |
| H304 | 3.954729066  | -2.483702842  | 5.712117568  |
| H305 | 3.351454328  | -0.373313626  | -5.976347899 |
| H306 | 4.208915398  | -3.352354546  | 4.196493728  |
| H307 | 5.159877385  | -5.215974404  | 5.371169622  |
| H308 | 6.690037248  | -3.289734837  | 4.582292591  |
| H309 | 6.423928158  | -2.518355758  | 6.156619397  |
| H310 | -3.375076266 | -2.923984311  | -6.818861752 |
| H311 | 6.240651388  | -6.721568413  | 7.775181289  |
| H312 | 5.978113640  | -9.573516186  | 6.648944928  |
| H313 | 1.147436168  | -0.805445396  | -3.667251642 |
| H314 | 6.862548532  | -8.671273768  | 9.279090897  |
| H315 | 5.459675678  | -9.394081680  | 8.840991734  |
| H316 | 5.353356924  | -1.454845804  | 3.272972367  |
| H317 | 0.103335396  | 0.983518133   | -4.995845635 |
| H318 | -1.601065721 | -3.669437219  | -5.364520896 |
| H319 | 9.379176757  | -8.094642053  | 1.985972729  |
| H320 | 8.633469880  | -6.580786390  | -1.013751708 |
| H321 | 7.724449160  | -6.462282676  | 2.754247784  |
| H322 | 9.006748082  | -9.110022591  | 0.888528662  |
| H323 | 6.244968865  | 2.193023089   | -8.693391602 |
| H324 | 7.155253201  | -3.475896173  | 1.803111070  |
| H325 | 3.476735627  | -6.226333315  | 2.754578454  |
| H326 | 5.149486793  | -2.229032378  | -6.439114017 |
| H327 | 4.631095631  | -8.109299248  | 1.499797759  |
| H328 | 5.869947467  | -6.922149845  | -5.021271448 |
| H329 | 4.377466532  | -5.350615599  | -3.686049549 |
| H330 | 7.601331083  | -9.740808292  | 7.329093727  |
| H331 | 4.673332434  | 0.531018303   | 2.519300007  |
| H332 | 8.970823103  | -3.671279125  | 3.374474706  |
| H333 | 7.739327211  | -2.036213489  | 1.832323340  |
| H334 | 9.243608124  | -4.139023294  | 5.691995384  |
| H335 | 3.800388810  | -0.524691837  | 6.369096410  |
| H336 | 5.477458543  | -11.132696697 | -0.770301690 |
| H337 | 5.539835423  | -7.641850982  | -1.388106622 |
| H338 | 6.612376977  | -7.396951107  | 0.005359180  |
| H339 | 3.608057291  | -8.064005675  | 0.034485135  |
| H340 | 3.074002834  | -2.594651924  | -5.255351215 |
| H341 | -1.790288375 | 0.463812499   | -6.571340113 |
| H342 | -3.602404447 | -1.206635674  | -7.235412038 |

|       |               |              |              |
|-------|---------------|--------------|--------------|
| H343  | 2.968259084   | -4.794790990 | 1.798423488  |
| H344  | 9.314426219   | -5.170604590 | 3.602432882  |
| H345  | 8.391867122   | -7.211328518 | 3.943549075  |
| H346  | 3.011172906   | 0.838319702  | 5.672034247  |
| H347  | 8.203043935   | -7.147977934 | -3.972928920 |
| H348  | 7.950697041   | -5.017253091 | -0.554747840 |
| H349  | 2.618336312   | -3.788217451 | -6.506697741 |
| H350  | 4.537342629   | 3.970701430  | -7.269298238 |
| H351  | 5.998514388   | 2.179480071  | 5.454723174  |
| H352  | 6.504258813   | 2.386229918  | 3.758766310  |
| H353  | 11.213337013  | -5.094052271 | -3.183028207 |
| H354  | 10.771859338  | -6.507144849 | -2.485352766 |
| H355  | 11.850950034  | -6.390114281 | 1.908121784  |
| H356  | 10.295683752  | -6.496768857 | 0.241893766  |
| H357  | 13.379289039  | -5.247949474 | -0.071139505 |
| H358  | 11.303634432  | -4.713719568 | 2.143038262  |
| H359  | 9.163167518   | 2.508912313  | 4.543877513  |
| H360  | -5.820209534  | 12.744077164 | 0.429288190  |
| H361  | 9.814562563   | -3.486133460 | 8.573879550  |
| H362  | 9.126997483   | -1.399479627 | 6.906255172  |
| H363  | -7.015559027  | 11.139873283 | -1.841713827 |
| H364  | -6.076402075  | 9.663575591  | 0.691807416  |
| H365  | -7.759504981  | 9.841562097  | 0.161203766  |
| H366  | -6.853578233  | 5.200980418  | -4.280105107 |
| H367  | 0.693584547   | -1.272392119 | 0.632843468  |
| H368  | -1.141370305  | -0.409664796 | -1.036622239 |
| Mo369 | 4.931895993   | -3.638365683 | -0.909171536 |
| N370  | -5.115021511  | -8.316923343 | -0.440668585 |
| N371  | -7.935575817  | -6.082618341 | 0.566182382  |
| N372  | -8.273963116  | -5.936290811 | 3.375997133  |
| N373  | -5.694989191  | -6.420201517 | 4.372918129  |
| N374  | -4.262839209  | -4.169010273 | 3.308443499  |
| N375  | -5.624747054  | -2.085691907 | 4.696657180  |
| N376  | -5.364709837  | -2.777430004 | 7.502758770  |
| N377  | -2.665226744  | -3.611744454 | 8.037014014  |
| N378  | -0.905581037  | -1.893287103 | 6.750932463  |
| N379  | -1.779448555  | 0.941609918  | 6.432344490  |
| N380  | -3.114174793  | 1.275330630  | 9.000671740  |
| N381  | 6.143541355   | -8.693120798 | 8.552924393  |
| N382  | 6.763637550   | -6.669120905 | 6.894315195  |
| N383  | 4.870611991   | -1.375756317 | 4.172933684  |
| N384  | 3.524941938   | -0.026281182 | 5.529261565  |
| N385  | 4.097496872   | 0.660821839  | 3.378345817  |
| N386  | 9.082758580   | -4.038052352 | 6.717931752  |
| N387  | -4.453569245  | -4.457009224 | -3.189127453 |
| N388  | -0.035337248  | -5.957375863 | -2.242855362 |
| N389  | -5.314774673  | -1.978145428 | -3.123269672 |
| N390  | -7.953779570  | -1.470701241 | -2.481799491 |
| N391  | -7.861811120  | -0.991930605 | 0.243525320  |
| N392  | -6.145947514  | 1.192343932  | 0.757781585  |
| N393  | -3.097120781  | 1.809715101  | -2.165410658 |
| N394  | -1.943368256  | 0.254921303  | -1.195931533 |
| N395  | -7.419861171  | 3.645232425  | 0.596408404  |
| N396  | -10.766688404 | 5.542037369  | -2.125178423 |
| N397  | -11.443088695 | 7.449502166  | -1.214166560 |
| N398  | 7.864941080   | 4.696733575  | 4.118502543  |
| N399  | 4.882823989   | 8.716953462  | -0.390574222 |
| N400  | 3.374517212   | 8.777127702  | -3.601252642 |
| N401  | 1.169552713   | 7.257465855  | -4.402686770 |
| N402  | -2.747864515  | 4.739335141  | -6.113300298 |
| N403  | -2.678381399  | 6.386114297  | -7.778005461 |

|      |               |              |              |
|------|---------------|--------------|--------------|
| N404 | -4.307988025  | 6.461627574  | -6.131857889 |
| N405 | -0.142816282  | 6.277461177  | -2.049007218 |
| N406 | -0.663574758  | 8.717416061  | -0.763519862 |
| N407 | -2.289000430  | 10.776887271 | -1.851011812 |
| N408 | -2.774909901  | 9.160114545  | -4.639906650 |
| N409 | -4.979767737  | 11.070722150 | -1.333275669 |
| N410 | 6.932147251   | -5.013540002 | -8.481545156 |
| N411 | 4.531672394   | -3.004754771 | -6.699668904 |
| N412 | 2.788437484   | -0.496104026 | -6.840880771 |
| N413 | 4.316117405   | 1.919797150  | -6.982585513 |
| N414 | 1.112350078   | -4.756004450 | -9.433670724 |
| N415 | -1.099328317  | -3.147704306 | -8.529984047 |
| N416 | 10.399864718  | -5.633356528 | -2.871962065 |
| N417 | 6.087410371   | -5.133855260 | -2.400183718 |
| N418 | 6.173130001   | -6.427217907 | -4.187112737 |
| N419 | 10.826103564  | -5.626517101 | 0.274789204  |
| N420 | 0.048425534   | 1.935122889  | 0.236536389  |
| N421 | 0.954247490   | 1.476052234  | -0.269350487 |
| O422 | -5.759577948  | -6.075803435 | 1.236840698  |
| O423 | -7.675118495  | -3.739268745 | 3.285801243  |
| O424 | -6.298813197  | -5.408732823 | 6.333339862  |
| O425 | -2.994838028  | -4.282171105 | 5.192449754  |
| O426 | -3.698163026  | -0.879894513 | 4.579637675  |
| O427 | -5.194150081  | -0.528434872 | 7.860433358  |
| O428 | -2.986028832  | -3.037509545 | 10.236770000 |
| O429 | 0.915857923   | -2.900151520 | 7.729050882  |
| O430 | 0.416713359   | 1.252220503  | 6.985130876  |
| O431 | -1.816790375  | 3.130950837  | 9.163549538  |
| O432 | -2.041698008  | 1.744628026  | 12.389680319 |
| O433 | 7.897906515   | -8.045068902 | 5.419792345  |
| O434 | 7.719066303   | -4.534415882 | 8.501607244  |
| O435 | 11.065115939  | -1.138055386 | 7.484025437  |
| O436 | -5.195072728  | -1.784485185 | -0.840238571 |
| O437 | -1.891120421  | -5.645531459 | -3.519317135 |
| O438 | -7.751622550  | 0.742078663  | -3.026634409 |
| O439 | -5.894414987  | 1.238030782  | -4.927563065 |
| O440 | -10.120668246 | -0.560198241 | 0.296487348  |
| O441 | -6.752994132  | 1.188942172  | 2.958160887  |
| O442 | -5.771244621  | 4.599627610  | 1.860093473  |
| O443 | -8.887382884  | 6.339970716  | 2.369874652  |
| O444 | 8.767104459   | 2.277830524  | 6.533914009  |
| O445 | 1.613092423   | 6.130106949  | 3.594002646  |
| O446 | 2.223237051   | 9.053410834  | -1.655405287 |
| O447 | 0.080480686   | 9.147793522  | -5.125244873 |
| O448 | -2.059395131  | 6.278446401  | -3.300506108 |
| O449 | -2.331223991  | 7.722268084  | 0.455031271  |
| O450 | 0.913268974   | 6.495896193  | 0.811038089  |
| O451 | -1.609056512  | 12.228880354 | -0.216073251 |
| O452 | -5.122912248  | 12.974128426 | -2.582099432 |
| O453 | -4.829435964  | 10.158483603 | -4.665329815 |
| O454 | -7.838081658  | 12.678117958 | 0.115695490  |
| O455 | -6.010040120  | 5.396157928  | -3.828142143 |
| O456 | 4.435479363   | -5.222909173 | -7.297391438 |
| O457 | 1.674024208   | -2.046487746 | -8.107789326 |
| O458 | 2.708800729   | 2.856844386  | -8.314101404 |
| O459 | 7.259762690   | 3.791278789  | -7.929811251 |
| O460 | -2.362087351  | -4.999106829 | -8.960652165 |
| O461 | 1.197948508   | -7.434626060 | -4.706448583 |
| O462 | 3.037750129   | -6.358102795 | -5.360043969 |
| O463 | -2.455458013  | 0.086228772  | -9.123317249 |
| O464 | 11.252226881  | -3.542358617 | -0.501189693 |

|                       |                      |              |               |              |
|-----------------------|----------------------|--------------|---------------|--------------|
|                       | O465                 | 13.870031711 | -4.369264748  | 1.705327683  |
|                       | O466                 | 0.990288132  | -6.065876401  | 0.641995309  |
|                       | O467                 | 1.618601713  | -7.792757572  | 1.894002781  |
|                       | O468                 | 7.213693016  | -9.858133078  | 0.000171469  |
|                       | O469                 | 5.134239496  | -10.214595351 | -0.809251804 |
|                       | O470                 | 6.149514613  | -4.575286701  | 0.745384540  |
|                       | O471                 | 6.048748712  | -6.091040752  | 2.411682433  |
|                       | O472                 | 4.001477392  | -5.471810336  | -0.472248597 |
|                       | O473                 | 9.556299170  | -4.259308129  | 3.915623422  |
|                       | O474                 | 7.631722966  | -2.831873058  | 2.388977111  |
|                       | O475                 | -4.358980921 | 3.378207553   | -4.172787006 |
|                       | O476                 | 9.784877117  | -8.735850540  | 1.349692408  |
|                       | O477                 | 8.616138565  | -6.766617936  | 3.084785637  |
|                       | S478                 | 3.215799716  | 5.478303067   | -2.343712502 |
|                       | S479                 | 2.308235876  | 1.966588506   | -2.997274024 |
|                       | S480                 | 3.335703747  | -3.109176770  | -2.618024038 |
|                       | S481                 | 3.494240477  | 2.545302881   | 0.332834029  |
|                       | S482                 | 0.798101473  | -1.540264058  | -0.703261095 |
|                       | S483                 | 5.196500058  | -0.411219571  | -4.583531800 |
|                       | S484                 | 3.887584932  | -2.435998424  | 0.922793731  |
|                       | S485                 | 5.891473594  | 2.530341824   | -2.264687129 |
|                       | S486                 | 6.757780430  | -2.217865139  | -1.491217655 |
|                       | S487                 | 6.403351060  | 0.441140527   | 1.069236714  |
| <b>8</b>              | bm1cnx2b2n2x47.car_3 |              |               |              |
| Fe( 139) 0.539 2.347  | C1                   | -7.368380654 | -5.703939765  | -1.224620685 |
| Fe( 140) 0.449 -1.793 | C2                   | -7.180763582 | -6.964520042  | -2.076174611 |
| Fe( 141) 0.582 2.913  | C3                   | -8.727156107 | -3.692028819  | -0.838180410 |
| Fe( 142) 0.553 -2.563 | C4                   | -8.910501466 | -3.771203090  | 0.675156970  |
| Fe( 143) 0.568 2.956  | C5                   | -9.595809409 | -5.092281287  | 2.608960234  |
| Fe( 144) 0.499 -2.264 | C6                   | -8.258048907 | -5.215818367  | 3.347582491  |
| Fe( 145) 0.467 -0.138 | C7                   | -5.897042115 | -5.851987942  | 3.195975579  |
| S=1                   | C8                   | -5.201516731 | -4.486789222  | 3.217126983  |
|                       | C9                   | -4.786528812 | -2.374841230  | 2.072359198  |
|                       | C10                  | -5.391781553 | -1.430337420  | 3.121455424  |
|                       | C11                  | -7.372727976 | -0.694071716  | 4.323990095  |
|                       | C12                  | -7.073208960 | -1.087029537  | 5.777182655  |
|                       | C13                  | -7.055677778 | -2.877722002  | 7.445714093  |
|                       | C14                  | -5.648405994 | -3.160979400  | 7.985608294  |
|                       | C15                  | -3.389612261 | -3.992710690  | 7.478527828  |
|                       | C16                  | -2.225321430 | -3.074813326  | 7.091960657  |
|                       | C17                  | -1.537315729 | -1.116917142  | 5.730120611  |
|                       | C18                  | -1.794813168 | 0.302907441   | 6.268933787  |
|                       | C19                  | -1.431719390 | -1.195153850  | 4.184403921  |
|                       | C20                  | -0.508132624 | -0.113636473  | 3.612423581  |
|                       | C21                  | -0.972468148 | -2.591806206  | 3.748508006  |
|                       | C22                  | -3.354084161 | 2.204969421   | 6.433252130  |
|                       | C23                  | -3.820468197 | 2.162115508   | 7.901755064  |
|                       | C24                  | -4.390864457 | 2.874303558   | 5.499060559  |
|                       | C25                  | -4.873436671 | 4.210742267   | 6.075910972  |
|                       | C26                  | -3.806997514 | 3.075840055   | 4.095591923  |
|                       | C27                  | -5.320335536 | 1.223788884   | 9.564434159  |
|                       | C28                  | -4.231590046 | 1.076895201   | 10.607403342 |
|                       | C29                  | 3.949197364  | -10.134335734 | 7.821959125  |
|                       | C30                  | 4.729520381  | -8.979397600  | 7.191728471  |
|                       | C31                  | 4.926531993  | -6.485349094  | 7.205044479  |
|                       | C32                  | 5.711721641  | -5.896909452  | 8.393436269  |
|                       | C33                  | 3.813164803  | -5.532837405  | 6.731580093  |
|                       | C34                  | 4.329089539  | -4.178392783  | 6.237778935  |
|                       | C35                  | 3.227255170  | -3.404536560  | 5.513478081  |
|                       | C36                  | 3.128782747  | -0.949114963  | 5.051512586  |



|     |              |              |              |
|-----|--------------|--------------|--------------|
| C37 | 7.837729081  | -4.918851703 | 9.116587521  |
| C38 | 8.095438915  | -3.436323848 | 8.959288755  |
| C39 | -4.131358520 | -3.224222610 | -3.014291218 |
| C40 | -4.774127814 | -1.827941545 | -3.005463750 |
| C41 | -2.711624097 | -3.119515836 | -2.422086759 |
| C42 | -2.091023602 | -4.454341137 | -1.961144809 |
| C43 | -1.314625244 | -5.223575117 | -3.027588233 |
| C44 | -4.973026367 | 0.217845447  | -4.386663530 |
| C45 | -6.448496614 | 0.627494499  | -4.333019635 |
| C46 | -4.324508189 | 0.733099136  | -5.689026232 |
| C47 | -8.716764996 | -0.034770770 | -3.705517966 |
| C48 | -8.879933764 | 0.342458389  | -2.224584335 |
| C49 | -7.870969661 | 0.385475614  | 0.012969124  |
| C50 | -7.036537422 | 1.568695221  | 0.509907732  |
| C51 | -5.180174293 | 3.127064840  | 0.119252745  |
| C52 | -5.905980419 | 4.469115036  | 0.292718981  |
| C53 | -4.059241612 | 3.377975305  | -0.905133257 |
| C54 | -3.265020167 | 2.162529668  | -1.246411473 |
| C55 | -3.076447219 | 0.949039335  | -0.613357150 |
| C56 | -1.885486981 | 0.858676750  | -2.397533756 |
| C57 | -7.515990083 | 5.981200186  | -0.788924583 |
| C58 | -8.136866945 | 6.394819312  | 0.544549022  |
| C59 | -8.603949151 | 5.826301409  | -1.876643735 |
| C60 | -9.152629533 | 7.090330673  | -2.471564212 |
| C61 | -9.441086328 | 8.313612926  | -1.896859720 |
| C62 | -9.930423246 | 8.340447770  | -4.058143202 |
| C63 | 6.645850951  | 2.483408667  | 6.794484919  |
| C64 | 7.591109430  | 1.359364665  | 7.176142033  |
| C65 | 5.462664775  | 1.836412317  | 6.029789204  |
| C66 | 4.423336084  | 2.842186110  | 5.590317158  |
| C67 | 3.356993304  | 3.211339016  | 6.431153494  |
| C68 | 4.496575655  | 3.439459150  | 4.318469459  |
| C69 | 2.393975822  | 4.139141194  | 6.017749573  |
| C70 | 3.548998312  | 4.372735349  | 3.895750389  |
| C71 | 2.496170086  | 4.720117495  | 4.747900955  |
| C72 | 5.467318052  | 7.306426513  | -0.037174409 |
| C73 | 4.599593675  | 8.205401528  | -0.925341860 |
| C74 | 4.728106638  | 5.996934086  | 0.274199760  |
| C75 | 4.309783865  | 9.193896677  | -3.158180948 |
| C76 | 3.037324628  | 8.561523214  | -3.726632685 |
| C77 | 1.697051706  | 6.497456647  | -3.954781210 |
| C78 | 0.601363628  | 6.496446234  | -2.864016699 |
| C79 | 2.118063039  | 5.085832493  | -4.402266227 |
| C80 | 1.026518635  | 4.152523460  | -4.934573267 |
| C81 | 0.403864254  | 4.513392082  | -6.294285109 |
| C82 | -1.027418036 | 6.508621970  | -6.749857612 |
| C83 | 0.020945150  | 6.354045398  | -0.499760135 |
| C84 | -0.378156659 | 7.772110022  | -0.048030247 |
| C85 | 0.477407898  | 5.570946285  | 0.739018636  |
| C86 | 0.456030033  | 10.006776003 | 0.493665425  |
| C87 | -0.075712865 | 11.240714832 | -0.227942251 |
| C88 | -0.955316098 | 12.205799380 | -2.312061540 |
| C89 | -2.443070954 | 12.591350174 | -2.159282111 |
| C90 | -0.587416125 | 11.995243705 | -3.797727101 |
| C91 | -1.339370820 | 10.817367927 | -4.408808068 |
| C92 | -4.673969126 | 11.859825490 | -1.437374841 |
| C93 | -5.031624219 | 13.040427483 | -0.543742007 |
| C94 | -5.326781119 | 10.561088073 | -0.891414078 |
| C95 | -5.134662200 | 9.393185150  | -1.830279829 |
| C96 | -5.981535577 | 9.230918139  | -2.938960106 |
| C97 | -4.082352167 | 8.478598813  | -1.659181179 |

|       |               |               |              |
|-------|---------------|---------------|--------------|
| C98   | -5.775272179  | 8.206903605   | -3.865406483 |
| C99   | -3.846707905  | 7.460262246   | -2.587791888 |
| C100  | -4.696108731  | 7.338519820   | -3.686158656 |
| C101  | 7.431341441   | -4.683557940  | -6.122134876 |
| C102  | 5.927417234   | -4.496453128  | -6.236860102 |
| C103  | 4.035966911   | -2.970897978  | -5.743540629 |
| C104  | 3.707668789   | -1.764603252  | -6.627158135 |
| C105  | 3.857130590   | 0.669748206   | -6.834221925 |
| C106  | 4.915487331   | 1.763057945   | -6.721762581 |
| C107  | 6.889848813   | 2.662637097   | -5.589501082 |
| C108  | 8.212375637   | 2.443169424   | -6.295633428 |
| C109  | 1.226776064   | -4.914344546  | -8.830169287 |
| C110  | 0.131702487   | -3.879404214  | -9.120231656 |
| C111  | 1.158175966   | -5.347208082  | -7.348042134 |
| C112  | 1.947173741   | -6.648521191  | -7.109737708 |
| C113  | 2.154337457   | -6.890856800  | -5.631754922 |
| C114  | -0.556839739  | -1.531712750  | -9.016659366 |
| C115  | 0.104840831   | -0.295786041  | -9.595193845 |
| C116  | -1.455074672  | -1.261578417  | -7.783940143 |
| C117  | -0.665918055  | -1.107433526  | -6.509754469 |
| C118  | -0.129691190  | 0.132780493   | -6.122231649 |
| C119  | -0.383281554  | -2.235939343  | -5.722067250 |
| C120  | 0.693697096   | 0.225108541   | -4.995197586 |
| C121  | 0.447668436   | -2.144481350  | -4.601326187 |
| C122  | 1.002750488   | -0.911910273  | -4.243404991 |
| C123  | 9.195088214   | -6.041163770  | -0.204119566 |
| C124  | 9.903351743   | -5.959642988  | 1.157711632  |
| C125  | 7.773561772   | -6.614298143  | -0.100104774 |
| C126  | 6.954988938   | -6.569462542  | -1.354745513 |
| C127  | 7.119843481   | -7.341641127  | -2.488418671 |
| C128  | 5.274633327   | -6.131884395  | -2.678023915 |
| C129  | 10.441330837  | -6.964207335  | 3.305195039  |
| C130  | 11.925122576  | -6.722303961  | 3.147230356  |
| C131  | 0.727976013   | -6.715676724  | 1.314504240  |
| C132  | 1.991800632   | -6.281700864  | 1.999353957  |
| C133  | 3.297668363   | -6.637792642  | 1.179150469  |
| C134  | 3.345052535   | -8.172972213  | 0.922896687  |
| C135  | 4.674602039   | -8.619475959  | 0.293888928  |
| C136  | 4.870261933   | -10.107058821 | 0.254618161  |
| C137  | 4.501303977   | -6.301799107  | 2.114884361  |
| C138  | 4.313279291   | -0.664054318  | -0.556806557 |
| Fe139 | 5.183497921   | -2.077930292  | -1.703639011 |
| Fe140 | 2.613235554   | 0.587091496   | -0.587639994 |
| Fe141 | 5.163387139   | 0.754071836   | 0.624413314  |
| Fe142 | 5.073008194   | 0.506573631   | -1.987373839 |
| Fe143 | 4.266568542   | 2.790512193   | -0.932125505 |
| Fe144 | 5.181624789   | -1.791829249  | 0.905710248  |
| Fe145 | 3.060770982   | -2.065697550  | -0.416163860 |
| H146  | -5.586187462  | -7.704628321  | -1.044487315 |
| H147  | -5.169031685  | -6.957591211  | -2.434544707 |
| H148  | -9.046448265  | -5.211499472  | -2.304832600 |
| H149  | -7.437225673  | -6.736946579  | -3.122758864 |
| H150  | -7.937627748  | -7.691282551  | -1.731538305 |
| H151  | -7.889571477  | -3.000458834  | -1.010301293 |
| H152  | -9.717742423  | -5.654411222  | 0.533293998  |
| H153  | -9.632359139  | -3.249180984  | -1.275677629 |
| H154  | -10.186013101 | -6.000771387  | 2.787662636  |
| H155  | -7.365469047  | -5.965111567  | 1.656921277  |
| H156  | -10.127428699 | -4.242628822  | 3.056059357  |
| H157  | -3.704567676  | -2.401522806  | 2.256897741  |
| H158  | -5.819293509  | -4.093412299  | 1.283736928  |

|      |              |              |               |
|------|--------------|--------------|---------------|
| H159 | -5.307034915 | -6.553624186 | 2.590759736   |
| H160 | -7.051258526 | 0.347620174  | 4.196291876   |
| H161 | -7.294277029 | -2.159164861 | 2.750657665   |
| H162 | -5.920091871 | -6.214600572 | 4.229924426   |
| H163 | -4.950420571 | -1.962831930 | 1.065769088   |
| H164 | -7.446321676 | -3.081327405 | 5.356004028   |
| H165 | -8.458531811 | -0.744259544 | 4.162200063   |
| H166 | -1.658025482 | -3.375762755 | 4.100330495   |
| H167 | -0.923320359 | -2.651367780 | 2.650604079   |
| H168 | 0.035473430  | -2.811070410 | 4.135024473   |
| H169 | -2.442666667 | -1.020374975 | 3.781936940   |
| H170 | -7.632685250 | -3.809536172 | 7.532918287   |
| H171 | -3.500091509 | 2.128069873  | 3.630615827   |
| H172 | -5.255766602 | 0.702368832  | 7.497383081   |
| H173 | -5.355561526 | 4.090057659  | 7.057179447   |
| H174 | -0.542706910 | -0.140399102 | 2.513338103   |
| H175 | 0.538403738  | -0.276120756 | 3.907052921   |
| H176 | 6.253133978  | 2.926713397  | 7.729862664   |
| H177 | -4.556759837 | 3.548971407  | 3.444461590   |
| H178 | -5.604048768 | 4.670163609  | 5.394413174   |
| H179 | -2.927705397 | 3.739532963  | 4.135216764   |
| H180 | -4.032760688 | 4.912630925  | 6.197160685   |
| H181 | -5.262947707 | 2.198646126  | 5.425407798   |
| H182 | -2.439969288 | 2.816427660  | 6.449932511   |
| H183 | -3.618966785 | 0.402042175  | 5.289664709   |
| H184 | -0.801788698 | 0.900546018  | 3.923227941   |
| H185 | 0.895882738  | 4.603112651  | 0.415658437   |
| H186 | -0.417054081 | 5.382916973  | 1.354342898   |
| H187 | 1.435902665  | 6.020039487  | 2.394144834   |
| H188 | 0.857853103  | 5.746230030  | 4.931532259   |
| H189 | 3.599907104  | 4.800326918  | 2.894396624   |
| H190 | 5.282773718  | 3.136209938  | 3.623576492   |
| H191 | 3.266674998  | 2.762636205  | 7.424498027   |
| H192 | -3.484243606 | -1.998317466 | 5.903723447   |
| H193 | -3.175162197 | -4.982228038 | 7.045919896   |
| H194 | -3.375199784 | -4.091218860 | 8.571657357   |
| H195 | -4.994091978 | -3.747497824 | 6.105574101   |
| H196 | -7.502105275 | -2.133661139 | 8.117885342   |
| H197 | 1.563031353  | 4.403145945  | 6.677980215   |
| H198 | -0.579742118 | -1.420146598 | 6.174336985   |
| H199 | -5.928939452 | 2.110667173  | 9.805573422   |
| H200 | -5.968535337 | 0.336262236  | 9.642490348   |
| H201 | -3.300291707 | 0.577295327  | 10.254407635  |
| H202 | 8.800050500  | -5.452796155 | 9.142320575   |
| H203 | 0.351553805  | -6.393535874 | -3.271143605  |
| H204 | 0.791844818  | -8.329010002 | 2.371470572   |
| H205 | 1.378935877  | -7.495511206 | -7.520319061  |
| H206 | 2.919733526  | -6.602865252 | -7.621786154  |
| H207 | 0.110957649  | -5.506450950 | -7.046412127  |
| H208 | 1.018341249  | -0.504204909 | -10.202299353 |
| H209 | 0.930349284  | -5.780882169 | -9.442131348  |
| H210 | -2.061890632 | -2.634387949 | -3.166498581  |
| H211 | -2.880805482 | -5.131882042 | -1.591389808  |
| H212 | 1.325669018  | -2.345971848 | -8.390836444  |
| H213 | -1.218053605 | -1.889444971 | -9.831379575  |
| H214 | 2.933498613  | -3.742288546 | -8.707968206  |
| H215 | 0.115501505  | -5.788254166 | -1.631539648  |
| H216 | 1.544498145  | -4.528673449 | -6.721649750  |
| H217 | 3.191832319  | -5.249698653 | -9.311583171  |
| H218 | -4.943344082 | -4.299344991 | -4.583691948  |
| H219 | -2.740424211 | -2.431382912 | -1.566498393  |

|      |               |              |              |
|------|---------------|--------------|--------------|
| H220 | 3.946057282   | -6.092256654 | -5.816063587 |
| H221 | -1.430475461  | -4.265510973 | -1.103724491 |
| H222 | -4.758014003  | 2.857555568  | 1.097894023  |
| H223 | -3.510706693  | 0.616384840  | 0.327467839  |
| H224 | -8.913790074  | 0.601563705  | 0.278337911  |
| H225 | -6.982146592  | -0.388822331 | -1.773658697 |
| H226 | -7.137143964  | 3.922831243  | -1.247609678 |
| H227 | -9.327060839  | 8.692017959  | -0.887278051 |
| H228 | -8.539614650  | 5.536177377  | 1.134790878  |
| H229 | -9.420572298  | 5.196839669  | -1.479210304 |
| H230 | -6.783026388  | 6.746692933  | -1.090916096 |
| H231 | -10.268737927 | 8.725227425  | -5.016612856 |
| H232 | -3.411988511  | 4.163222332  | -0.480217749 |
| H233 | -4.504630831  | 3.801297611  | -1.821524895 |
| H234 | -10.235423770 | 10.060874911 | -2.840259694 |
| H235 | -8.155104156  | 5.257573302  | -2.706271475 |
| H236 | -5.806980574  | 1.522369631  | -1.144751825 |
| H237 | -7.570123820  | -0.500187404 | 0.592417909  |
| H238 | -9.091847750  | 0.811813177  | -4.294769537 |
| H239 | -1.193331254  | 0.546165875  | -3.175384653 |
| H240 | -9.361766464  | -0.899371216 | -3.911001165 |
| H241 | 7.971541145   | 4.020209679  | 6.507598004  |
| H242 | 6.697694308   | 4.054491544  | 5.480548000  |
| H243 | 1.973969565   | 6.007636287  | -1.375452443 |
| H244 | -0.901090577  | 5.886183996  | -0.874735699 |
| H245 | 1.479343315   | 8.484173701  | -0.547169902 |
| H246 | -2.426877772  | 2.822130833  | -3.108055309 |
| H247 | -3.464293797  | 3.412548982  | -5.145049773 |
| H248 | -3.610788922  | 4.840155992  | -4.479101274 |
| H249 | -3.249094922  | 0.505660062  | -5.669364982 |
| H250 | -4.777749287  | 0.223357151  | -6.557217603 |
| H251 | 0.502431632   | 11.865384642 | -3.867464056 |
| H252 | -0.871478461  | 12.904519930 | -4.342921792 |
| H253 | 0.365993178   | 9.577957433  | -4.324791639 |
| H254 | -1.142001273  | 8.816121310  | -4.780901286 |
| H255 | -0.358411678  | 7.955489394  | -8.039551478 |
| H256 | 0.126548877   | 3.594468450  | -6.832127577 |
| H257 | -6.453619760  | 8.079663157  | -4.713109775 |
| H258 | -3.423239232  | 8.542644500  | -0.787977109 |
| H259 | -2.784472319  | 6.857774399  | -5.731478186 |
| H260 | 2.604234159   | 4.576007772  | -3.555188179 |
| H261 | 3.563329534   | 6.729589055  | -2.942948379 |
| H262 | 0.227820860   | 4.009542833  | -4.190350756 |
| H263 | -7.019158729  | -1.301148023 | -4.054270782 |
| H264 | 4.972694621   | 9.435405149  | -4.000686581 |
| H265 | -4.313328944  | -1.795477316 | -4.946912963 |
| H266 | 2.892896668   | 5.211176641  | -5.176588254 |
| H267 | -2.990201758  | 6.793098659  | -2.473381128 |
| H268 | -5.378061587  | 2.353223809  | -5.460033317 |
| H269 | 4.001045833   | 10.139064388 | -2.689241029 |
| H270 | 0.492607985   | 6.452394006  | -8.141280480 |
| H271 | -2.468024314  | 7.921502989  | -7.049986347 |
| H272 | -3.278252144  | -4.383352281 | -4.479148783 |
| H273 | -4.746335096  | -3.828516971 | -2.319747397 |
| H274 | -6.820831089  | 9.915216565  | -3.085526734 |
| H275 | -4.503665822  | 0.758745499  | -3.546253868 |
| H276 | 1.258409045   | 7.051144901  | -4.795319922 |
| H277 | 1.145848610   | 5.031107622  | -6.916417156 |
| H278 | 1.506472897   | 3.171211277  | -5.054278861 |
| H279 | -1.576989333  | 4.931783126  | -5.595807126 |
| H280 | -0.189344127  | 9.854405797  | 1.371450044  |

|      |              |               |              |
|------|--------------|---------------|--------------|
| H281 | -0.411124522 | 10.150469623  | -1.932661365 |
| H282 | -0.397167774 | 13.079776322  | -1.945209654 |
| H283 | 1.461942846  | 10.262057441  | 0.853401102  |
| H284 | -2.813707459 | 10.811337420  | -1.235382037 |
| H285 | 7.937486060  | -3.708735492  | -6.182881999 |
| H286 | 7.606618161  | -5.071394049  | -5.097481723 |
| H287 | 9.129904221  | -5.004061505  | -0.562334102 |
| H288 | 8.863045411  | -5.876657650  | -6.948084072 |
| H289 | 7.332870291  | -6.403292499  | -7.202994672 |
| H290 | 5.399565258  | 5.350684605   | 0.852857389  |
| H291 | 4.962531668  | 8.295832974   | 1.675504970  |
| H292 | 5.871250439  | 7.884837121   | -2.508634491 |
| H293 | 3.830904817  | 6.221071323   | 0.868597955  |
| H294 | 6.372114003  | 8.811058210   | 1.028876930  |
| H295 | 7.073909491  | 2.759885575   | -4.508162747 |
| H296 | 6.402145810  | 7.065786131   | -0.567625398 |
| H297 | 3.092424119  | -5.392571536  | 7.554953476  |
| H298 | 5.607105179  | -6.686851514  | 6.368878155  |
| H299 | 5.937555291  | 0.808904276   | -5.176671607 |
| H300 | 3.161916503  | 0.963193393   | 4.346897778  |
| H301 | 3.737352068  | 0.434795137   | -7.899853326 |
| H302 | 0.666711309  | -3.030121967  | -4.001133110 |
| H303 | 2.908031727  | 1.124760703   | -6.504019571 |
| H304 | 2.388383318  | -3.190443335  | 6.188684370  |
| H305 | 4.470728590  | -0.575578834  | -5.155618244 |
| H306 | 2.825653639  | -4.015176013  | 4.687596356  |
| H307 | 3.283292921  | -6.046471887  | 5.913217947  |
| H308 | 5.164758530  | -4.321626013  | 5.536472171  |
| H309 | 4.705368754  | -3.573503104  | 7.078838792  |
| H310 | -2.152564219 | -2.107411520  | -7.693362479 |
| H311 | 3.640312228  | -7.775231455  | 8.355417239  |
| H312 | 3.286054183  | -10.515516429 | 7.030379009  |
| H313 | 1.660559013  | -0.826554264  | -3.377169166 |
| H314 | 3.674560416  | -9.841633761  | 9.842204728  |
| H315 | 2.322288091  | -10.342181792 | 9.064498283  |
| H316 | 4.315716453  | -2.257538435  | 4.101846163  |
| H317 | 1.112599008  | 1.183656512   | -4.684233018 |
| H318 | -0.826021114 | -3.199144710  | -5.986067597 |
| H319 | 7.698253584  | -9.316930006  | 3.259373341  |
| H320 | 7.839835525  | -7.670384022  | 0.217590712  |
| H321 | 6.153845438  | -7.499617667  | 3.806570881  |
| H322 | 7.420965970  | -10.229194462 | 2.046239631  |
| H323 | 8.221431792  | 1.610102672   | -7.040494986 |
| H324 | 6.196384123  | -4.450188536  | 2.937902178  |
| H325 | 2.075131701  | -6.724393195  | 3.003217931  |
| H326 | 6.081361493  | -2.659431760  | -5.327596574 |
| H327 | 3.207675813  | -8.686839154  | 1.887583361  |
| H328 | 5.848542532  | -7.472698450  | -4.210400039 |
| H329 | 4.352242863  | -5.743344064  | -3.092101606 |
| H330 | 4.683047598  | -10.931921043 | 8.028406107  |
| H331 | 4.041002057  | -0.173765221  | 3.370782530  |
| H332 | 7.608743084  | -4.918510045  | 4.825966378  |
| H333 | 6.850974711  | -3.058812557  | 3.160373087  |
| H334 | 7.316746468  | -5.527344092  | 7.116592251  |
| H335 | 2.352978704  | -1.243544280  | 6.935399448  |
| H336 | 4.118863009  | -11.711378066 | -0.404746030 |
| H337 | 4.730724446  | -8.228533974  | -0.732679571 |
| H338 | 5.523510253  | -8.212299418  | 0.853771015  |
| H339 | 2.513013076  | -8.449066452  | 0.258452074  |
| H340 | 3.763009393  | -2.777637966  | -4.693430002 |
| H341 | -0.348899322 | 1.019685558   | -6.722555510 |

|       |              |              |              |
|-------|--------------|--------------|--------------|
| H342  | -2.045572748 | -0.359482164 | -8.004939008 |
| H343  | 1.976087658  | -5.186327194 | 2.080569176  |
| H344  | 7.693614541  | -6.459078516 | 5.020223283  |
| H345  | 6.487121986  | -8.386142755 | 5.041589216  |
| H346  | 1.870180536  | 0.224151497  | 6.177035589  |
| H347  | 7.886315903  | -8.056297477 | -2.763909711 |
| H348  | 7.227331127  | -6.076972914 | 0.685703842  |
| H349  | 3.462594755  | -3.823058345 | -6.114592800 |
| H350  | 6.467879559  | 3.616508840  | -5.946408103 |
| H351  | 5.005247423  | 1.086921703  | 6.693872133  |
| H352  | 5.861346747  | 1.305758007  | 5.150072667  |
| H353  | 10.925823181 | -6.338390653 | -1.266745990 |
| H354  | 10.208472964 | -7.732802983 | -0.797448108 |
| H355  | 10.318846004 | -7.952791481 | 3.775943439  |
| H356  | 9.109095161  | -7.771135225 | 1.849783038  |
| H357  | 12.355743387 | -7.060011435 | 2.174512236  |
| H358  | 10.007767250 | -6.214225743 | 3.986147113  |
| H359  | 8.251510830  | 1.020570029  | 6.341892107  |
| H360  | -4.234513593 | 13.357171147 | 0.169916347  |
| H361  | 7.339951317  | -5.061625396 | 10.091994246 |
| H362  | 7.280577022  | -2.860281064 | 8.458040165  |
| H363  | -5.085835750 | 12.069252775 | -2.438601364 |
| H364  | -4.903235261 | 10.336381082 | 0.100171594  |
| H365  | -6.396684766 | 10.771569470 | -0.751454731 |
| H366  | -5.151268951 | 6.278366381  | -5.256693853 |
| H367  | 0.629883769  | -1.037569397 | 0.718021396  |
| Mo368 | 4.584182358  | -4.218763489 | -0.123864693 |
| N369  | -5.866512539 | -7.581329420 | -2.021143786 |
| N370  | -8.486868952 | -4.972071651 | -1.490094297 |
| N371  | -9.458278301 | -4.907385671 | 1.172903128  |
| N372  | -7.248138527 | -5.802244195 | 2.656923242  |
| N373  | -5.351535207 | -3.717272628 | 2.109953235  |
| N374  | -6.725065874 | -1.544486198 | 3.337711775  |
| N375  | -7.155031260 | -2.410879261 | 6.071905074  |
| N376  | -4.717962392 | -3.562860764 | 7.075198649  |
| N377  | -2.528605090 | -2.054187754 | 6.249348005  |
| N378  | -2.990676379 | 0.872274004  | 5.945069623  |
| N379  | -4.787224766 | 1.261539177  | 8.213905632  |
| N380  | 3.139174909  | -9.735838856 | 8.978012689  |
| N381  | 4.351869124  | -7.759300037 | 7.616824762  |
| N382  | 3.718451775  | -2.149521389 | 4.929069988  |
| N383  | 2.287716225  | -0.697291334 | 6.083058992  |
| N384  | 3.327718037  | -0.014044350 | 4.115530638  |
| N385  | 6.960326243  | -5.459988046 | 8.095674444  |
| N386  | -4.099037756 | -3.758157886 | -4.383411625 |
| N387  | -0.197656537 | -5.847517665 | -2.601762362 |
| N388  | -4.726232053 | -1.200046512 | -4.211802760 |
| N389  | -7.358818579 | -0.344242169 | -4.109636976 |
| N390  | -7.816641315 | 0.091027420  | -1.408658721 |
| N391  | -6.090501401 | 2.075869981  | -0.337788117 |
| N392  | -2.499351838 | 2.084603257  | -2.396771569 |
| N393  | -2.224160396 | 0.146204278  | -1.334259716 |
| N394  | -6.880081781 | 4.687318059  | -0.627190149 |
| N395  | -9.463820983 | 7.120540012  | -3.822213279 |
| N396  | -9.932002874 | 9.094268783  | -2.921906387 |
| N397  | 7.366540773  | 3.426657905  | 5.935554391  |
| N398  | 5.825553828  | 7.968138789  | 1.228925639  |
| N399  | 5.042149280  | 8.387229051  | -2.202321912 |
| N400  | 2.889422197  | 7.233333398  | -3.541198345 |
| N401  | -0.808112169 | 5.332068765  | -6.174921949 |
| N402  | -0.171970416 | 7.037949902  | -7.648320786 |

|      |              |              |              |
|------|--------------|--------------|--------------|
| N403 | -2.097816159 | 7.255251675  | -6.377136639 |
| N404 | 1.008509748  | 6.334382784  | -1.576136747 |
| N405 | 0.535953903  | 8.765099359  | -0.262686081 |
| N406 | -0.546980694 | 11.064628867 | -1.497828722 |
| N407 | -0.651079142 | 9.647862768  | -4.453676301 |
| N408 | -3.232436270 | 11.691632574 | -1.525719915 |
| N409 | 7.919930967  | -5.563920863 | -7.188745728 |
| N410 | 5.450981248  | -3.312888251 | -5.807760874 |
| N411 | 4.092189057  | -0.574681188 | -6.125240344 |
| N412 | 5.925134871  | 1.604678139  | -5.828561651 |
| N413 | 2.536210375  | -4.465344914 | -9.320908121 |
| N414 | 0.429038759  | -2.581746730 | -8.831125218 |
| N415 | 10.015390126 | -6.797968655 | -1.171528217 |
| N416 | 5.795356218  | -5.810646716 | -1.497730088 |
| N417 | 6.050390880  | -7.050267790 | -3.308186025 |
| N418 | 9.759350004  | -7.004654168 | 2.020736492  |
| N419 | 0.071954203  | 2.191598706  | -0.398261115 |
| N420 | 1.024347975  | 1.597638454  | -0.495946295 |
| O421 | -6.586386769 | -5.393009324 | -0.306695842 |
| O422 | -8.578972185 | -2.820084228 | 1.401136251  |
| O423 | -8.142400457 | -4.822511266 | 4.520519101  |
| O424 | -4.552929345 | -4.102706455 | 4.203195728  |
| O425 | -4.689728431 | -0.602220830 | 3.725330324  |
| O426 | -6.813390673 | -0.223745957 | 6.632407727  |
| O427 | -5.429610900 | -3.066522331 | 9.201400814  |
| O428 | -1.089564296 | -3.309856898 | 7.530052029  |
| O429 | -0.946934638 | 0.880957294  | 6.967393967  |
| O430 | -3.343128072 | 2.922006243  | 8.761192580  |
| O431 | -4.373862346 | 1.411670248  | 11.775095866 |
| O432 | 5.612634336  | -9.225777292 | 6.342911753  |
| O433 | 5.203357428  | -5.848954960 | 9.527473429  |
| O434 | 9.109550319  | -2.885941367 | 9.359581730  |
| O435 | -5.297668342 | -1.331434586 | -1.987600658 |
| O436 | -1.697207050 | -5.291756213 | -4.217640987 |
| O437 | -6.758087739 | 1.833559638  | -4.445486090 |
| O438 | -4.474137961 | 2.154008661  | -5.821778571 |
| O439 | -9.951998123 | 0.828910324  | -1.842709582 |
| O440 | -7.233865270 | 2.029889329  | 1.638204407  |
| O441 | -5.553033961 | 5.312683697  | 1.123495168  |
| O442 | -8.240324699 | 7.544669083  | 0.937829241  |
| O443 | 7.637452534  | 0.838501762  | 8.281925648  |
| O444 | 1.571520507  | 5.632234975  | 4.277040527  |
| O445 | 3.563489281  | 8.754674150  | -0.507835224 |
| O446 | 2.227789482  | 9.284004433  | -4.345923007 |
| O447 | -0.588363692 | 6.661742369  | -3.184583676 |
| O448 | -1.460918613 | 7.958851944  | 0.523979074  |
| O449 | 1.441908660  | 6.337172485  | 1.467863400  |
| O450 | -0.084721253 | 12.336925843 | 0.348136952  |
| O451 | -2.861756821 | 13.677129495 | -2.585408912 |
| O452 | -2.526043711 | 10.918786037 | -4.760494983 |
| O453 | -6.125672620 | 13.582154752 | -0.569136241 |
| O454 | -4.413553548 | 6.330011083  | -4.618981220 |
| O455 | 5.202851607  | -5.426120269 | -6.677691627 |
| O456 | 3.135240821  | -1.900952877 | -7.732372259 |
| O457 | 4.792578426  | 2.772970733  | -7.436248483 |
| O458 | 9.204946722  | 3.121544814  | -6.082592073 |
| O459 | -0.973750290 | -4.222153185 | -9.574179787 |
| O460 | 1.298920324  | -7.373426757 | -4.895982543 |
| O461 | 3.340732527  | -6.504610682 | -5.122966697 |
| O462 | -0.324868189 | 0.842125858  | -9.471925299 |
| O463 | 10.667548730 | -5.016539064 | 1.436556145  |

|  |                        |              |               |              |
|--|------------------------|--------------|---------------|--------------|
|  | O464                   | 12.637806772 | -6.269040508  | 4.032656565  |
|  | O465                   | 0.125270545  | -6.084492544  | 0.458907856  |
|  | O466                   | 0.222213275  | -7.940340138  | 1.680421208  |
|  | O467                   | 5.806177743  | -10.718215200 | 0.766248962  |
|  | O468                   | 3.895326133  | -10.756479622 | -0.435168455 |
|  | O469                   | 5.317596892  | -5.407809298  | 1.668260956  |
|  | O470                   | 4.650842601  | -6.925361373  | 3.194225688  |
|  | O471                   | 3.347122100  | -5.921494469  | 0.003412216  |
|  | O472                   | 7.979700825  | -5.604365032  | 5.438089882  |
|  | O473                   | 6.631164881  | -3.887504436  | 3.630039015  |
|  | O474                   | -2.957613324 | 4.141270492   | -4.699930324 |
|  | O475                   | 8.133393274  | -9.986615528  | 2.673206126  |
|  | O476                   | 6.925551754  | -7.931003366  | 4.276368831  |
|  | S477                   | 4.182274130  | 5.087114688   | -1.241607103 |
|  | S478                   | 3.238890638  | 1.693834063   | -2.574155251 |
|  | S479                   | 3.433261414  | -3.452775830  | -2.093722376 |
|  | S480                   | 3.366262623  | 2.058957808   | 1.076719449  |
|  | S481                   | 1.043698308  | -1.289957682  | -0.567725792 |
|  | S482                   | 5.981738967  | -0.936659557  | -3.462358841 |
|  | S483                   | 3.396408815  | -2.963885642  | 1.561397757  |
|  | S484                   | 6.405017142  | 1.944241609   | -0.913382052 |
|  | S485                   | 6.647039017  | -3.019727998  | -0.249905739 |
|  | S486                   | 6.040328479  | -0.368778991  | 2.359916251  |
|  | <b>8u(a)</b>           |              |               |              |
|  | Fe1                    | 2.84         |               |              |
|  | Fe2                    | -0.79        |               |              |
|  | Fe3                    | 2.89         |               |              |
|  | Fe4                    | -2.28        |               |              |
|  | Fe5                    | 2.47         |               |              |
|  | Fe6                    | -1.67        |               |              |
|  | Fe7                    | -2.00        |               |              |
|  | S=1                    |              |               |              |
|  | bmlcnx2b2n2x47ua.car_2 |              |               |              |
|  | 486                    |              |               |              |
|  | C1                     | -7.026057999 | -5.825643636  | -2.256478825 |
|  | C2                     | -6.693859597 | -7.064996943  | -3.092895481 |
|  | C3                     | -8.444524679 | -3.830765703  | -2.041093864 |
|  | C4                     | -8.843195745 | -3.929880596  | -0.570392336 |
|  | C5                     | -9.766262735 | -5.290568292  | 1.233720767  |
|  | C6                     | -8.539212499 | -5.397590536  | 2.148090934  |
|  | C7                     | -6.166455368 | -5.992458989  | 2.309651946  |
|  | C8                     | -5.505219064 | -4.618359824  | 2.453122454  |
|  | C9                     | -4.967743231 | -2.476967218  | 1.416866836  |
|  | C10                    | -5.736118916 | -1.565744322  | 2.385551334  |
|  | C11                    | -7.880279233 | -0.879525680  | 3.296691077  |
|  | C12                    | -7.776662170 | -1.287561266  | 4.773214464  |
|  | C13                    | -7.923359582 | -3.100571895  | 6.409126691  |
|  | C14                    | -6.586048000 | -3.329952238  | 7.126398387  |
|  | C15                    | -4.271813142 | -4.139470194  | 6.931012430  |
|  | C16                    | -3.101479328 | -3.174813395  | 6.715294349  |
|  | C17                    | -2.269113963 | -1.212832741  | 5.450927251  |
|  | C18                    | -2.617069389 | 0.197857679   | 5.962052436  |
|  | C19                    | -1.951382659 | -1.276454403  | 3.933666777  |
|  | C20                    | -0.974241789 | -0.177503923  | 3.500045950  |
|  | C21                    | -1.412220688 | -2.660405876  | 3.555217452  |
|  | C22                    | -4.232619782 | 2.058706235   | 5.950384241  |
|  | C23                    | -4.896431166 | 1.975331194   | 7.340147513  |
|  | C24                    | -5.147405523 | 2.729709133   | 4.897734538  |
|  | C25                    | -5.714869128 | 4.052609027   | 5.424745218  |
|  | C26                    | -4.386283935 | 2.960021304   | 3.585396977  |
|  | C27                    | -6.585031947 | 0.968182456   | 8.767297927  |
|  | C28                    | -5.663382449 | 0.892944860   | 9.966661816  |
|  | C29                    | 3.082898882  | -10.154959601 | 8.153093285  |
|  | C30                    | 3.920953432  | -8.972038054  | 7.666987319  |
|  | C31                    | 4.051172350  | -6.476889763  | 7.726388562  |
|  | C32                    | 4.666820498  | -5.898212590  | 9.015420077  |
|  | C33                    | 2.991732597  | -5.534583026  | 7.127156147  |
|  | C34                    | 3.541368206  | -4.165625267  | 6.717211898  |
|  | C35                    | 2.528982157  | -3.407642757  | 5.859617865  |



|     |              |              |              |
|-----|--------------|--------------|--------------|
| C36 | 2.409141056  | -0.942981884 | 5.443283939  |
| C37 | 6.657287016  | -4.875406403 | 10.013945634 |
| C38 | 6.893737835  | -3.385522512 | 9.890311370  |
| C39 | -3.631370346 | -3.270073185 | -3.575559310 |
| C40 | -4.311451935 | -1.892051271 | -3.641742570 |
| C41 | -2.303486575 | -3.140677838 | -2.804487565 |
| C42 | -1.712493742 | -4.460438500 | -2.272832753 |
| C43 | -0.794966171 | -5.207584913 | -3.236328055 |
| C44 | -4.355334505 | 0.176803761  | -5.009549993 |
| C45 | -5.829691980 | 0.565622885  | -5.156963190 |
| C46 | -3.534838953 | 0.722709744  | -6.197693941 |
| C47 | -8.151210227 | -0.125873643 | -4.839384205 |
| C48 | -8.507230494 | 0.236178135  | -3.389661153 |
| C49 | -7.812003487 | 0.262829858  | -1.039112324 |
| C50 | -7.076238346 | 1.450594489  | -0.412902764 |
| C51 | -5.219616422 | 3.052649501  | -0.527356749 |
| C52 | -5.981144467 | 4.383051520  | -0.431153774 |
| C53 | -3.967195882 | 3.331963442  | -1.378942612 |
| C54 | -3.148506763 | 2.119578661  | -1.676448696 |
| C55 | -3.054230162 | 0.871315256  | -1.088825557 |
| C56 | -1.667913373 | 0.840972213  | -2.725439200 |
| C57 | -7.459623654 | 5.893890331  | -1.693824220 |
| C58 | -8.279453384 | 6.261074577  | -0.458832686 |
| C59 | -8.381965606 | 5.738197721  | -2.927100049 |
| C60 | -8.871679819 | 6.996631344  | -3.579312809 |
| C61 | -9.311377167 | 8.190173480  | -3.040072837 |
| C62 | -9.442744290 | 8.249288327  | -5.251794905 |
| C63 | 5.651759279  | 2.517439535  | 7.633545079  |
| C64 | 6.558751409  | 1.405638739  | 8.125942363  |
| C65 | 4.604430622  | 1.860123003  | 6.697059128  |
| C66 | 3.607092382  | 2.851125248  | 6.145855499  |
| C67 | 2.451788927  | 3.201604499  | 6.868185205  |
| C68 | 3.806495967  | 3.451638741  | 4.890457692  |
| C69 | 1.524982489  | 4.115203479  | 6.356752504  |
| C70 | 2.894630722  | 4.369808986  | 4.370093176  |
| C71 | 1.752365064  | 4.699374250  | 5.104207928  |
| C72 | 5.303938836  | 7.469998025  | 0.788861769  |
| C73 | 4.528651785  | 8.353087821  | -0.198076200 |
| C74 | 4.597611896  | 6.115002853  | 0.945938845  |
| C75 | 4.495664894  | 9.352717704  | -2.445439359 |
| C76 | 3.338610703  | 8.684516649  | -3.188827156 |
| C77 | 2.093520652  | 6.595125308  | -3.613451111 |
| C78 | 0.863887007  | 6.549553666  | -2.681571952 |
| C79 | 2.599224634  | 5.198936429  | -4.020422313 |
| C80 | 1.598155261  | 4.250552166  | -4.689880226 |
| C81 | 1.156209071  | 4.609248715  | -6.119020000 |
| C82 | -0.242069976 | 6.579545768  | -6.750377428 |
| C83 | -0.026954391 | 6.342042076  | -0.423189552 |
| C84 | -0.510262778 | 7.744654231  | -0.002899773 |
| C85 | 0.261418282  | 5.527994504  | 0.845525754  |
| C86 | 0.185774738  | 9.994028921  | 0.663336614  |
| C87 | -0.287159473 | 11.222221674 | -0.110708119 |
| C88 | -0.878886546 | 12.210483917 | -2.282241780 |
| C89 | -2.379064472 | 12.574429086 | -2.321427462 |
| C90 | -0.315661017 | 12.037099682 | -3.709750046 |
| C91 | -0.949464839 | 10.851041343 | -4.427322404 |
| C92 | -4.678010298 | 11.809685551 | -1.924359359 |
| C93 | -5.149035235 | 12.968870791 | -1.054620300 |
| C94 | -5.390290034 | 10.500947046 | -1.490116109 |
| C95 | -5.051451607 | 9.343824843  | -2.400607706 |
| C96 | -5.731438321 | 9.173788206  | -3.617099061 |

|       |               |               |              |
|-------|---------------|---------------|--------------|
| C97   | -4.008878192  | 8.453458423   | -2.092291805 |
| C98   | -5.375937113  | 8.159290827   | -4.509351052 |
| C99   | -3.620327220  | 7.449229424   | -2.985360248 |
| C100  | -4.307823013  | 7.318760099   | -4.190956960 |
| C101  | 8.279428410   | -4.449882265  | -5.128416359 |
| C102  | 6.795953910   | -4.299742519  | -5.421482713 |
| C103  | 4.817171274   | -2.818220340  | -5.173250739 |
| C104  | 4.579969412   | -1.604656585  | -6.078291664 |
| C105  | 4.706098019   | 0.839609635   | -6.219547909 |
| C106  | 5.747849595   | 1.930317548   | -5.983910433 |
| C107  | 7.532954048   | 2.866734448   | -4.596406821 |
| C108  | 8.935093630   | 2.676229180   | -5.137830918 |
| C109  | 2.497392724   | -4.764593326  | -8.653174495 |
| C110  | 1.433164148   | -3.745195824  | -9.083349017 |
| C111  | 2.227514716   | -5.224341346  | -7.201695189 |
| C112  | 3.015531178   | -6.505548236  | -6.867904983 |
| C113  | 3.014033270   | -6.770295439  | -5.379226092 |
| C114  | 0.689787992   | -1.411496019  | -9.045687823 |
| C115  | 1.399489001   | -0.155207156  | -9.512869725 |
| C116  | -0.355922312  | -1.182609032  | -7.925577358 |
| C117  | 0.250404858   | -1.036997839  | -6.549751435 |
| C118  | 0.701770649   | 0.205114452   | -6.071151448 |
| C119  | 0.416985905   | -2.168369243  | -5.729621549 |
| C120  | 1.313182668   | 0.304779472   | -4.815866564 |
| C121  | 1.036892530   | -2.068648616  | -4.479659321 |
| C122  | 1.495315992   | -0.831722360  | -4.019061141 |
| C123  | 9.271511050   | -5.867357240  | 0.955599188  |
| C124  | 9.790154764   | -5.782353658  | 2.399913246  |
| C125  | 7.853812978   | -6.454138926  | 0.873640002  |
| C126  | 7.205686300   | -6.419115527  | -0.476047987 |
| C127  | 7.535932155   | -7.176753414  | -1.581439623 |
| C128  | 5.711289956   | -5.997300218  | -2.011334200 |
| C129  | 10.035087392  | -6.790216769  | 4.598917447  |
| C130  | 11.521969528  | -6.518208829  | 4.648311371  |
| C131  | 0.678589233   | -6.748751025  | 1.339625216  |
| C132  | 1.838211966   | -6.280029983  | 2.173524024  |
| C133  | 3.243564957   | -6.603878934  | 1.524424952  |
| C134  | 3.349989765   | -8.132549358  | 1.251868668  |
| C135  | 4.759885260   | -8.542494132  | 0.797210803  |
| C136  | 4.988494865   | -10.025318353 | 0.786076580  |
| C137  | 4.310560284   | -6.261509762  | 2.609536815  |
| C138  | 4.354130891   | -0.563517934  | 0.003816265  |
| Fe139 | 5.378451422   | -1.953233440  | -1.034642904 |
| Fe140 | 2.996998537   | 0.824296424   | -0.300063357 |
| Fe141 | 5.058753247   | 0.863677292   | 1.303132483  |
| Fe142 | 5.365172571   | 0.614784214   | -1.269385156 |
| Fe143 | 4.502211919   | 2.956616013   | -0.372428632 |
| Fe144 | 5.033495949   | -1.687343524  | 1.515171441  |
| Fe145 | 2.989994848   | -1.967567399  | 0.016561565  |
| H146  | -5.239381621  | -7.794342146  | -1.865704015 |
| H147  | -4.653634209  | -7.002877235  | -3.165668355 |
| H148  | -8.532361152  | -5.326134835  | -3.564729625 |
| H149  | -6.810258964  | -6.819228212  | -4.159973247 |
| H150  | -7.472887372  | -7.813983160  | -2.867700390 |
| H151  | -7.593486190  | -3.135185230  | -2.080566429 |
| H152  | -9.592509233  | -5.821558377  | -0.846480652 |
| H153  | -9.280575802  | -3.386707505  | -2.598144147 |
| H154  | -10.352714579 | -6.214336845  | 1.318178907  |
| H155  | -7.406606200  | -6.097743707  | 0.583426261  |
| H156  | -10.374131891 | -4.458296971  | 1.612683602  |
| H157  | -3.922241604  | -2.491027493  | 1.750533209  |

|      |              |              |              |
|------|--------------|--------------|--------------|
| H158 | -5.844393555 | -4.196686200 | 0.458266205  |
| H159 | -5.487597561 | -6.671668999 | 1.776357159  |
| H160 | -7.569264261 | 0.170633435  | 3.229642902  |
| H161 | -7.552702827 | -2.313069921 | 1.726766694  |
| H162 | -6.321062212 | -6.381464342 | 3.323139511  |
| H163 | -4.994849904 | -2.046169169 | 0.405491942  |
| H164 | -8.028067168 | -3.284884406 | 4.282347909  |
| H165 | -8.932259073 | -0.951755976 | 2.987532793  |
| H166 | -2.118721701 | -3.461172089 | 3.817173904  |
| H167 | -1.216307582 | -2.703980047 | 2.473755558  |
| H168 | -0.456386489 | -2.857404164 | 4.064878855  |
| H169 | -2.901829617 | -1.113481944 | 3.400486878  |
| H170 | -8.464303017 | -4.058302830 | 6.408411672  |
| H171 | -4.028854047 | 2.020308560  | 3.140593829  |
| H172 | -6.217674373 | 0.482576775  | 6.726897480  |
| H173 | -6.317038367 | 3.916634255  | 6.334553488  |
| H174 | -0.803954103 | -0.235608557 | 2.414600732  |
| H175 | 0.006485446  | -0.306346949 | 3.980094277  |
| H176 | 5.115670797  | 2.926614132  | 8.510833379  |
| H177 | -5.040532399 | 3.454758550  | 2.852118123  |
| H178 | -6.354457168 | 4.517491595  | 4.659746898  |
| H179 | -3.515494017 | 3.613904683  | 3.754658917  |
| H180 | -4.900845183 | 4.757349253  | 5.659283054  |
| H181 | -5.991961369 | 2.045106096  | 4.698768836  |
| H182 | -3.344694708 | 2.688365460  | 6.106442993  |
| H183 | -4.304471326 | 0.265602653  | 4.763136714  |
| H184 | -1.346491338 | 0.832200245  | 3.733302716  |
| H185 | 0.708263412  | 4.559296821  | 0.557053915  |
| H186 | -0.706975620 | 5.339523753  | 1.336086387  |
| H187 | 0.986669664  | 5.957374202  | 2.622772308  |
| H188 | 0.076346915  | 5.678270474  | 5.093425029  |
| H189 | 3.049554417  | 4.802229640  | 3.380542488  |
| H190 | 4.670892855  | 3.166604932  | 4.285873785  |
| H191 | 2.264195413  | 2.745813554  | 7.844505968  |
| H192 | -4.191586307 | -2.154495785 | 5.322788574  |
| H193 | -3.959679904 | -5.112933540 | 6.523347421  |
| H194 | -4.400336958 | -4.248013966 | 8.015213780  |
| H195 | -5.694611118 | -3.957785182 | 5.358787693  |
| H196 | -8.484648169 | -2.385630324 | 7.024020391  |
| H197 | 0.622528330  | 4.362863923  | 6.921677209  |
| H198 | -1.376230398 | -1.505641814 | 6.018172231  |
| H199 | -7.273800705 | 1.818686094  | 8.902883622  |
| H200 | -7.182502551 | 0.042681681  | 8.760678885  |
| H201 | -4.671497728 | 0.421622199  | 9.777222390  |
| H202 | 7.619444961  | -5.387549332 | 10.165244698 |
| H203 | 0.916922704  | -6.335603895 | -3.278003066 |
| H204 | 0.638134028  | -8.344063109 | 2.424395759  |
| H205 | 2.541488690  | -7.362625992 | -7.368165050 |
| H206 | 4.049111449  | -6.419218963 | -7.232952115 |
| H207 | 1.154297631  | -5.419148642 | -7.056660925 |
| H208 | 2.388764760  | -0.338250437 | -9.995130143 |
| H209 | 2.312676167  | -5.625827965 | -9.313459188 |
| H210 | -1.573059354 | -2.635945196 | -3.454762506 |
| H211 | -2.522694407 | -5.157786287 | -1.992840203 |
| H212 | 2.483656618  | -2.202172123 | -8.179614952 |
| H213 | 0.141081394  | -1.768705037 | -9.939693060 |
| H214 | 4.146618364  | -3.565430347 | -8.268510270 |
| H215 | 0.469473977  | -5.740526199 | -1.678521319 |
| H216 | 2.496077723  | -4.406925564 | -6.514842824 |
| H217 | 4.519200937  | -5.053222097 | -8.863934853 |
| H218 | -4.209172458 | -4.334752384 | -5.252448520 |

|      |               |              |              |
|------|---------------|--------------|--------------|
| H219 | -2.455259138  | -2.456596155 | -1.959100919 |
| H220 | 4.793471344   | -5.925763642 | -5.286345268 |
| H221 | -1.158386632  | -4.247294488 | -1.348066649 |
| H222 | -4.937725827  | 2.769434003  | 0.496865920  |
| H223 | -3.597946058  | 0.504205956  | -0.221023807 |
| H224 | -8.884542076  | 0.461877858  | -0.921989387 |
| H225 | -6.678034877  | -0.485835389 | -2.695161462 |
| H226 | -6.989194259  | 3.851348099  | -2.130419626 |
| H227 | -9.379842310  | 8.550635143  | -2.020556935 |
| H228 | -8.754012801  | 5.378282161  | 0.037911020  |
| H229 | -9.229972097  | 5.085640934  | -2.651704576 |
| H230 | -6.711508832  | 6.683158695  | -1.870902403 |
| H231 | -9.642310817  | 8.638534740  | -6.247574835 |
| H232 | -3.372785370  | 4.086558052  | -0.838016463 |
| H233 | -4.279399996  | 3.803387334  | -2.326389101 |
| H234 | -10.022221113 | 9.924547471  | -4.071335404 |
| H235 | -7.808909146  | 5.191743462  | -3.692218312 |
| H236 | -5.647612720  | 1.469533993  | -1.897461020 |
| H237 | -7.580208754  | -0.627665453 | -0.435575430 |
| H238 | -8.458778827  | 0.723168919  | -5.463254473 |
| H239 | -0.892654793  | 0.553696476  | -3.431145143 |
| H240 | -8.754651938  | -0.994700533 | -5.135066018 |
| H241 | 6.952673172   | 4.100899959  | 7.567139082  |
| H242 | 5.845301277   | 4.112289247  | 6.362470999  |
| H243 | 2.037592278   | 6.065445742  | -1.030063903 |
| H244 | -0.879726757  | 5.872575927  | -0.934940489 |
| H245 | 1.380630508   | 8.508287204  | -0.238732110 |
| H246 | -2.097917887  | 2.839989438  | -3.406834874 |
| H247 | -2.824298018  | 3.425346441  | -5.541797995 |
| H248 | -3.086279526  | 4.838893934  | -4.877174501 |
| H249 | -2.469806698  | 0.520896232  | -6.018388411 |
| H250 | -3.840558646  | 0.209446222  | -7.126189639 |
| H251 | 0.777158371   | 11.936509178 | -3.641114407 |
| H252 | -0.553499128  | 12.948323785 | -4.273521816 |
| H253 | 0.755571870   | 9.648269323  | -4.120398728 |
| H254 | -0.660401352  | 8.857108247  | -4.774744993 |
| H255 | 0.565376661   | 8.056646765  | -7.918595036 |
| H256 | 0.979524851   | 3.689994155  | -6.697490612 |
| H257 | -5.925470906  | 8.024822540  | -5.444268464 |
| H258 | -3.479226768  | 8.524416598  | -1.137468019 |
| H259 | -2.129103613  | 6.882874569  | -5.977201552 |
| H260 | 2.988598532   | 4.690903002  | -3.124090166 |
| H261 | 3.802868819   | 6.854582337  | -2.354756253 |
| H262 | 0.712419338   | 4.093999898  | -4.055005525 |
| H263 | -6.407771741  | -1.370682885 | -4.966249808 |
| H264 | 5.255089383   | 9.633657437  | -3.187475280 |
| H265 | -3.575835240  | -1.811191736 | -5.495272966 |
| H266 | 3.459500334   | 5.348801860  | -4.693856410 |
| H267 | -2.769208667  | 6.803586298  | -2.762021052 |
| H268 | -4.650660443  | 2.314102352  | -6.103477689 |
| H269 | 4.092145441   | 10.278662908 | -2.011634780 |
| H270 | 1.454077991   | 6.573889247  | -7.920585737 |
| H271 | -1.659678143  | 7.966553145  | -7.233855985 |
| H272 | -2.571372768  | -4.394321241 | -4.925958003 |
| H273 | -4.317272102  | -3.896936336 | -2.973127986 |
| H274 | -6.558745624  | 9.839607547  | -3.873567300 |
| H275 | -4.022588622  | 0.711338866  | -4.102790521 |
| H276 | 1.757572018   | 7.153379906  | -4.497195846 |
| H277 | 1.962256998   | 5.152701497  | -6.627417226 |
| H278 | 2.104221701   | 3.276150748  | -4.743652737 |
| H279 | -0.913805623  | 4.975806074  | -5.703386179 |

|      |              |               |              |
|------|--------------|---------------|--------------|
| H280 | -0.558968392 | 9.818630521   | 1.453673385  |
| H281 | -0.342550011 | 10.159959987  | -1.868207019 |
| H282 | -0.395536204 | 13.087897482  | -1.827482286 |
| H283 | 1.129700728  | 10.280410460  | 1.148404723  |
| H284 | -2.851398215 | 10.760515038  | -1.515504475 |
| H285 | 8.765575234  | -3.463494051  | -5.132533410 |
| H286 | 8.341587476  | -4.830931152  | -4.088059218 |
| H287 | 9.246867117  | -4.829114323  | 0.594259356  |
| H288 | 9.819492074  | -5.625801450  | -5.762683177 |
| H289 | 8.341497077  | -6.165776711  | -6.216787233 |
| H290 | 5.199881418  | 5.484782378   | 1.612291781  |
| H291 | 4.505026805  | 8.405686114   | 2.417719303  |
| H292 | 5.992828274  | 8.075253716   | -1.611283392 |
| H293 | 3.603782640  | 6.272248784   | 1.390261433  |
| H294 | 5.990269150  | 8.961195978   | 2.018425341  |
| H295 | 7.583981089  | 2.964062995   | -3.500328373 |
| H296 | 6.317907895  | 7.294623913   | 0.395659249  |
| H297 | 2.168281557  | -5.416774222  | 7.851675054  |
| H298 | 4.838444134  | -6.651992792  | 6.983167576  |
| H299 | 6.540357398  | 1.011225307   | -4.290120801 |
| H300 | 2.480880654  | 0.986648388   | 4.799035181  |
| H301 | 4.702877591  | 0.620876507   | -7.295426333 |
| H302 | 1.162231854  | -2.953692441  | -3.852778052 |
| H303 | 3.727798007  | 1.293091508   | -5.986961835 |
| H304 | 1.594873550  | -3.238484474  | 6.410601974  |
| H305 | 5.106956202  | -0.428434782  | -4.498880906 |
| H306 | 2.266024009  | -4.011596373  | 4.975130196  |
| H307 | 2.580076458  | -6.045651748  | 6.242157901  |
| H308 | 4.465414636  | -4.286311630  | 6.132315561  |
| H309 | 3.792970281  | -3.562242274  | 7.604173327  |
| H310 | -1.039727500 | -2.043968250  | -7.939285775 |
| H311 | 2.630763906  | -7.805311649  | 8.653212629  |
| H312 | 2.552116281  | -10.534953224 | 7.267017655  |
| H313 | 1.968420114  | -0.746355004  | -3.038321157 |
| H314 | 2.511171441  | -9.879687179  | 10.112534046 |
| H315 | 1.303610748  | -10.429816695 | 9.151157610  |
| H316 | 3.782035043  | -2.182974913  | 4.663896601  |
| H317 | 1.651993968  | 1.270088194   | -4.436176763 |
| H318 | 0.037732185  | -3.136499312  | -6.064389340 |
| H319 | 7.359522928  | -9.196150173  | 4.148415994  |
| H320 | 7.886423330  | -7.508454349  | 1.202068692  |
| H321 | 5.726173668  | -7.428200404  | 4.509718613  |
| H322 | 7.264917296  | -10.102052099 | 2.901274806  |
| H323 | 9.063665153  | 1.829994785   | -5.855011320 |
| H324 | 5.845185034  | -4.379509534  | 3.668421043  |
| H325 | 1.803472068  | -6.715230928  | 3.183558489  |
| H326 | 6.787866552  | -2.460386184  | -4.507542014 |
| H327 | 3.088251344  | -8.674099815  | 2.174506110  |
| H328 | 6.512298323  | -7.310625624  | -3.461899144 |
| H329 | 4.848358963  | -5.620931561  | -2.545431525 |
| H330 | 3.795849752  | -10.940004359 | 8.457815739  |
| H331 | 3.511481029  | -0.104542211  | 3.914812632  |
| H332 | 6.983476322  | -4.830754898  | 5.731223530  |
| H333 | 6.393865838  | -2.963789075  | 4.003135149  |
| H334 | 6.413727351  | -5.478385479  | 7.959224146  |
| H335 | 1.384424050  | -1.321867518  | 7.190923992  |
| H336 | 4.343555317  | -11.641421168 | 0.041906919  |
| H337 | 4.929267289  | -8.147002674  | -0.215110592 |
| H338 | 5.521589701  | -8.113715998  | 1.457334450  |
| H339 | 2.622645975  | -8.402768228  | 0.472899706  |
| H340 | 4.407504848  | -2.640561031  | -4.166349977 |

|       |              |              |              |
|-------|--------------|--------------|--------------|
| H341  | 0.567522432  | 1.095225036  | -6.691792232 |
| H342  | -0.935516755 | -0.288289997 | -8.201266840 |
| H343  | 1.782145098  | -5.185481153 | 2.246525334  |
| H344  | 7.074727745  | -6.372830830 | 5.920667778  |
| H345  | 5.934869900  | -8.316958886 | 5.773295859  |
| H346  | 0.928921152  | 0.138035195  | 6.388624285  |
| H347  | 8.346231148  | -7.876694240 | -1.754857029 |
| H348  | 7.208056190  | -5.921343794 | 1.582634388  |
| H349  | 4.315921814  | -3.677680823 | -5.621962383 |
| H350  | 7.145789473  | 3.815365946  | -5.002546951 |
| H351  | 4.085119316  | 1.083914465  | 7.280299538  |
| H352  | 5.134123818  | 1.362168137  | 5.868708336  |
| H353  | 11.127551308 | -6.143193329 | 0.126011655  |
| H354  | 10.373105514 | -7.546076153 | 0.502513207  |
| H355  | 9.868820363  | -7.784528975 | 5.043853053  |
| H356  | 8.927384904  | -7.602905361 | 2.969306232  |
| H357  | 12.091499642 | -6.850849465 | 3.748177177  |
| H358  | 9.500645178  | -6.052652801 | 5.218966473  |
| H359  | 7.351197085  | 1.105640634  | 7.397697627  |
| H360  | -4.463131618 | 13.238016629 | -0.216103939 |
| H361  | 6.037737169  | -5.034311653 | 10.914008059 |
| H362  | 6.143233984  | -2.836981994 | 9.271300196  |
| H363  | -4.958859712 | 12.041874571 | -2.964973516 |
| H364  | -5.111538390 | 10.268076935 | -0.450426828 |
| H365  | -6.471818016 | 10.699187875 | -1.503170070 |
| H366  | -4.519739108 | 6.274410179  | -5.821027952 |
| H367  | 0.603019308  | -3.236182765 | 0.463710294  |
| Mo368 | 4.647127805  | -4.146528700 | 0.443080847  |
| N369  | -5.385037288 | -7.653239477 | -2.868662323 |
| N370  | -8.104076104 | -5.100892624 | -2.669695397 |
| N371  | -9.435301505 | -5.080966887 | -0.167281460 |
| N372  | -7.432839301 | -5.954225139 | 1.593456146  |
| N373  | -5.507583882 | -3.828397559 | 1.349092443  |
| N374  | -7.084793265 | -1.700593045 | 2.399450003  |
| N375  | -7.856819296 | -2.617335972 | 5.038741541  |
| N376  | -5.549788223 | -3.758146263 | 6.353323572  |
| N377  | -3.306968270 | -2.169685595 | 5.826574121  |
| N378  | -3.773229856 | 0.747027959  | 5.492127084  |
| N379  | -5.856829282 | 1.029788113  | 7.511555518  |
| N380  | 2.099807817  | -9.791140585 | 9.180694082  |
| N381  | 3.447834150  | -7.766934227 | 8.034753144  |
| N382  | 3.050605459  | -2.122329837 | 5.378580433  |
| N383  | 1.438611968  | -0.740371002 | 6.361954435  |
| N384  | 2.702385861  | 0.021599430  | 4.561333054  |
| N385  | 5.933672560  | -5.430759465 | 8.884883118  |
| N386  | -3.408069824 | -3.783999530 | -4.934268146 |
| N387  | 0.279445575  | -5.803956533 | -2.679509769 |
| N388  | -4.107427103 | -1.239879422 | -4.819914348 |
| N389  | -6.749297104 | -0.418326565 | -5.069695153 |
| N390  | -7.556305868 | -0.009742553 | -2.443204581 |
| N391  | -6.045008289 | 2.000481166  | -1.123815353 |
| N392  | -2.249660680 | 2.082437246  | -2.728995762 |
| N393  | -2.144041116 | 0.084047365  | -1.749221619 |
| N394  | -6.822166200 | 4.608937091  | -1.471949179 |
| N395  | -8.960357147 | 7.046631871  | -4.961909316 |
| N396  | -9.665141702 | 8.974031928  | -4.119075671 |
| N397  | 6.458937222  | 3.498180052  | 6.904867852  |
| N398  | 5.435653713  | 8.104989935  | 2.109613473  |
| N399  | 5.126329811  | 8.565178493  | -1.405368876 |
| N400  | 3.200475349  | 7.351795745  | -3.031795174 |
| N401  | -0.079505722 | 5.399759154  | -6.162771939 |

|      |              |              |              |
|------|--------------|--------------|--------------|
| N402 | 0.721983514  | 7.141586294  | -7.508622007 |
| N403 | -1.371371227 | 7.295690470  | -6.526702229 |
| N404 | 1.098691294  | 6.358344864  | -1.353706521 |
| N405 | 0.400283084  | 8.760506818  | -0.080144968 |
| N406 | -0.561992734 | 11.060492054 | -1.439008344 |
| N407 | -0.238572081 | 9.694896451  | -4.376045357 |
| N408 | -3.235916273 | 11.649114126 | -1.826780761 |
| N409 | 8.912994219  | -5.320781770 | -6.123642149 |
| N410 | 6.238509995  | -3.128006574 | -5.061353987 |
| N411 | 4.861067088  | -0.415755376 | -5.507889389 |
| N412 | 6.618209280  | 1.795238174  | -4.950709810 |
| N413 | 3.853766935  | -4.281173653 | -8.945299060 |
| N414 | 1.666419842  | -2.446043549 | -8.749642131 |
| N415 | 10.218478775 | -6.614147282 | 0.104336447  |
| N416 | 6.061084112  | -5.679959130 | -0.768371432 |
| N417 | 6.582207382  | -6.896608728 | -2.536508496 |
| N418 | 9.537467590  | -6.830191911 | 3.233706904  |
| N419 | 0.151876326  | 1.494824602  | -0.349495093 |
| N420 | 1.217001506  | 1.112817132  | -0.358851766 |
| O421 | -6.393471153 | -5.520852677 | -1.227948519 |
| O422 | -8.632672461 | -2.981834914 | 0.203657236  |
| O423 | -8.594601015 | -5.020482537 | 3.330083868  |
| O424 | -5.010720297 | -4.247974395 | 3.529660194  |
| O425 | -5.145596821 | -0.742917816 | 3.104762035  |
| O426 | -7.669756602 | -0.430186877 | 5.666638115  |
| O427 | -6.512557330 | -3.171585580 | 8.353063039  |
| O428 | -2.038079986 | -3.362234603 | 7.325781434  |
| O429 | -1.875108227 | 0.784087780  | 6.767160423  |
| O430 | -4.572443866 | 2.742792820  | 8.262606031  |
| O431 | -5.999104502 | 1.250084657  | 11.087099705 |
| O432 | 4.933717602  | -9.180019259 | 6.965590229  |
| O433 | 4.020322525  | -5.880301600 | 10.077640054 |
| O434 | 7.821883977  | -2.803342966 | 10.428010509 |
| O435 | -4.998203503 | -1.431884742 | -2.707191188 |
| O436 | -1.024696562 | -5.280711830 | -4.465266828 |
| O437 | -6.137886569 | 1.769656889  | -5.296858583 |
| O438 | -3.701252950 | 2.140415281  | -6.343183622 |
| O439 | -9.624088175 | 0.711880742  | -3.145456950 |
| O440 | -7.426877313 | 1.881427587  | 0.690569755  |
| O441 | -5.758619697 | 5.212709675  | 0.457274270  |
| O442 | -8.464192908 | 7.397988615  | -0.057561542 |
| O443 | 6.444977615  | 0.848946811  | 9.208750058  |
| O444 | 0.870963373  | 5.597899940  | 4.534306500  |
| O445 | 3.426686534  | 8.857989917  | 0.084821326  |
| O446 | 2.606022522  | 9.388828350  | -3.916059420 |
| O447 | -0.276887785 | 6.704881890  | -3.148397200 |
| O448 | -1.665505526 | 7.900314108  | 0.416598483  |
| O449 | 1.132774498  | 6.268456542  | 1.705977130  |
| O450 | -0.420787561 | 12.304165533 | 0.476097102  |
| O451 | -2.750754530 | 13.666105322 | -2.775123252 |
| O452 | -2.074072708 | 10.929211906 | -4.946739658 |
| O453 | -6.214294639 | 13.540655636 | -1.224012623 |
| O454 | -3.878377245 | 6.328280042  | -5.086435727 |
| O455 | 6.154992369  | -5.250673643 | -5.938799173 |
| O456 | 4.175743063  | -1.734165936 | -7.255484165 |
| O457 | 5.732660740  | 2.922270148  | -6.732828469 |
| O458 | 9.870822294  | 3.395093873  | -4.824201988 |
| O459 | 0.405080252  | -4.102168455 | -9.683876674 |
| O460 | 2.077018930  | -7.291450154 | -4.782903780 |
| O461 | 4.098829230  | -6.355808692 | -4.694524082 |
| O462 | 0.940928558  | 0.974131484  | -9.424175479 |

|  |                       |               |               |              |
|--|-----------------------|---------------|---------------|--------------|
|  | O463                  | 10.499486825  | -4.831552813  | 2.778906424  |
|  | O464                  | 12.091938199  | -6.047504491  | 5.623325292  |
|  | O465                  | 0.176942343   | -6.140325072  | 0.406640805  |
|  | O466                  | 0.155963756   | -7.979404088  | 1.657864341  |
|  | O467                  | 5.856848657   | -10.622948250 | 1.418213915  |
|  | O468                  | 4.118086079   | -10.688639558 | -0.020425708 |
|  | O469                  | 5.170124875   | -5.356117315  | 2.277685212  |
|  | O470                  | 4.321768537   | -6.884433917  | 3.697767521  |
|  | O471                  | 3.433203938   | -5.867430416  | 0.373496201  |
|  | O472                  | 7.287051984   | -5.516910098  | 6.379549941  |
|  | O473                  | 6.146976568   | -3.811646708  | 4.422895906  |
|  | O474                  | -2.396702725  | 4.156285936   | -5.023329742 |
|  | O475                  | 7.878477902   | -9.858744096  | 3.625162569  |
|  | O476                  | 6.446642128   | -7.840487053  | 5.069309066  |
|  | S477                  | 4.364501320   | 5.236295839   | -0.667346408 |
|  | S478                  | 3.701316209   | 1.847682380   | -2.149592659 |
|  | S479                  | 3.719326785   | -3.342332668  | -1.605041563 |
|  | S480                  | 3.261750055   | 2.249011836   | 1.422471283  |
|  | S481                  | 0.756744804   | -1.976899644  | -0.049261251 |
|  | S482                  | 6.427915452   | -0.807774064  | -2.638393577 |
|  | S483                  | 3.261607238   | -2.951652357  | 1.974570511  |
|  | S484                  | 6.571638886   | 2.016939849   | -0.031201789 |
|  | S485                  | 6.671691718   | -2.873483967  | 0.575715194  |
|  | S486                  | 5.626169243   | -0.305493589  | 3.132084313  |
|  | <b>8u(b)</b>          |               |               |              |
|  | Fe( 139)              | 0.547         | 2.288         |              |
|  | Fe( 140)              | 0.385         | -1.392        |              |
|  | Fe( 141)              | 0.568         | 2.874         |              |
|  | Fe( 142)              | 0.530         | -2.338        |              |
|  | Fe( 143)              | 0.563         | 2.907         |              |
|  | Fe( 144)              | 0.513         | -2.442        |              |
|  | Fe( 145)              | 0.467         | 1.655         |              |
|  | <b>S=2</b>            |               |               |              |
|  | bm1cnx2b2n2x47u.car_2 |               |               |              |
|  | 486                   |               |               |              |
|  | C1                    | -8.025426107  | -4.263274518  | -2.434879850 |
|  | C2                    | -7.985819120  | -5.281072296  | -3.580077126 |
|  | C3                    | -9.129586057  | -2.265464327  | -1.522801583 |
|  | C4                    | -9.324732473  | -2.693703597  | -0.070447935 |
|  | C5                    | -10.170372318 | -4.365420291  | 1.495359288  |
|  | C6                    | -8.859598281  | -4.834132159  | 2.138325043  |
|  | C7                    | -6.597198752  | -5.692894469  | 1.760983850  |
|  | C8                    | -5.739461899  | -4.474271493  | 2.113703309  |
|  | C9                    | -5.048541172  | -2.209100666  | 1.535502931  |
|  | C10                   | -5.544290403  | -1.499205712  | 2.804016884  |
|  | C11                   | -7.432235049  | -0.850516495  | 4.191053467  |
|  | C12                   | -7.189174216  | -1.629792992  | 5.491039732  |
|  | C13                   | -7.397897145  | -3.773361797  | 6.653577825  |
|  | C14                   | -6.040486253  | -4.354088473  | 7.071290597  |
|  | C15                   | -3.905886596  | -5.315905082  | 6.313668471  |
|  | C16                   | -2.640156571  | -4.468390505  | 6.147446301  |
|  | C17                   | -1.708895406  | -2.329153682  | 5.301983734  |
|  | C18                   | -1.786738549  | -1.065496147  | 6.178101969  |
|  | C19                   | -1.600351341  | -2.033819893  | 3.782338852  |
|  | C20                   | -0.546553578  | -0.963496372  | 3.477813657  |
|  | C21                   | -1.309174103  | -3.323743766  | 3.007211867  |
|  | C22                   | -3.101717797  | 0.899847413   | 6.866082412  |
|  | C23                   | -3.578296805  | 0.544936922   | 8.288786611  |
|  | C24                   | -4.036623966  | 1.914994366   | 6.165576267  |
|  | C25                   | -4.322200432  | 3.117497927   | 7.073403385  |
|  | C26                   | -3.430409539  | 2.381970242   | 4.835898998  |
|  | C27                   | -5.184095769  | -0.599318895  | 9.704544621  |
|  | C28                   | -4.126515069  | -1.107232677  | 10.662946098 |
|  | C29                   | 2.605638321   | -12.194097954 | 4.911689348  |
|  | C30                   | 3.512974674   | -11.012669122 | 4.573428013  |
|  | C31                   | 4.018428594   | -8.651943184  | 5.217712168  |
|  | C32                   | 4.864285722   | -8.491930252  | 6.495044388  |
|  | C33                   | 3.038449228   | -7.478418322  | 5.032927362  |
|  | C34                   | 3.726529541   | -6.118880550  | 4.886983564  |



|     |              |              |              |
|-----|--------------|--------------|--------------|
| C35 | 2.736428681  | -5.053785537 | 4.418717462  |
| C36 | 2.950236874  | -2.566030576 | 4.581661431  |
| C37 | 7.086546514  | -7.982525726 | 7.388148661  |
| C38 | 7.535452459  | -6.553397505 | 7.602379140  |
| C39 | -4.494008921 | -1.814717072 | -3.623189579 |
| C40 | -4.949100252 | -0.396258624 | -3.248514958 |
| C41 | -3.078926833 | -2.043846144 | -3.055375522 |
| C42 | -2.629545283 | -3.515977548 | -2.966443409 |
| C43 | -1.952570698 | -4.076266601 | -4.213246952 |
| C44 | -4.879556913 | 1.937730228  | -4.069879994 |
| C45 | -6.290498212 | 2.507296435  | -3.880256914 |
| C46 | -4.150483018 | 2.676319127  | -5.210467358 |
| C47 | -8.628920697 | 1.994221313  | -3.372399192 |
| C48 | -8.754300688 | 1.973838782  | -1.842005209 |
| C49 | -7.748953777 | 1.333231514  | 0.301065225  |
| C50 | -6.778648578 | 2.242119941  | 1.060610354  |
| C51 | -4.738192629 | 3.610661004  | 1.029956551  |
| C52 | -5.301524923 | 4.939134664  | 1.554488378  |
| C53 | -3.585322881 | 3.971404869  | 0.074951838  |
| C54 | -2.946926002 | 2.789430294  | -0.573030246 |
| C55 | -2.935506273 | 1.441857008  | -0.271365571 |
| C56 | -1.728587609 | 1.643847783  | -2.035821146 |
| C57 | -6.714965985 | 6.855675744  | 0.928744915  |
| C58 | -7.308409559 | 6.977194192  | 2.332227882  |
| C59 | -7.796983702 | 7.110585841  | -0.146044299 |
| C60 | -8.179433995 | 8.540084543  | -0.393197291 |
| C61 | -8.334741582 | 9.597859535  | 0.481220265  |
| C62 | -8.771149259 | 10.241447485 | -1.594310530 |
| C63 | 6.849094040  | -0.142988370 | 7.025783890  |
| C64 | 7.648242971  | -1.431058319 | 7.083323433  |
| C65 | 5.604126071  | -0.419391424 | 6.144424099  |
| C66 | 4.700942484  | 0.785245643  | 6.011596041  |
| C67 | 3.696640674  | 1.054229559  | 6.959692347  |
| C68 | 4.842038350  | 1.675516407  | 4.931078342  |
| C69 | 2.858227684  | 2.167723390  | 6.835796674  |
| C70 | 4.017684871  | 2.794681690  | 4.798139988  |
| C71 | 3.023623047  | 3.037263623  | 5.748966285  |
| C72 | 6.359207644  | 6.392623218  | 1.684133705  |
| C73 | 5.609957829  | 7.584013553  | 1.073389056  |
| C74 | 5.471083469  | 5.140567674  | 1.656221727  |
| C75 | 5.443614808  | 9.120151174  | -0.840748946 |
| C76 | 4.114239569  | 8.800908462  | -1.527791492 |
| C77 | 2.533117877  | 7.037266488  | -2.231646991 |
| C78 | 1.437684579  | 6.891804899  | -1.153187656 |
| C79 | 2.777740924  | 5.743849189  | -3.030569285 |
| C80 | 1.580264127  | 5.121532805  | -3.756823673 |
| C81 | 1.022452077  | 5.891230145  | -4.966813888 |
| C82 | -0.156950943 | 8.090107515  | -4.869556488 |
| C83 | 0.821614238  | 6.216161345  | 1.106986825  |
| C84 | 0.604652275  | 7.508435027  | 1.919547883  |
| C85 | 1.153339344  | 5.081504265  | 2.085912038  |
| C86 | 1.704780537  | 9.415799588  | 2.986904652  |
| C87 | 1.340751207  | 10.848739152 | 2.608805367  |
| C88 | 0.593821136  | 12.408901789 | 0.860703646  |
| C89 | -0.833827571 | 12.923658974 | 1.145609173  |
| C90 | 0.939361600  | 12.543363689 | -0.638453153 |
| C91 | 0.054887677  | 11.657949965 | -1.507921523 |
| C92 | -3.144030765 | 12.319137925 | 1.718670101  |
| C93 | -3.354879102 | 13.258162836 | 2.898942047  |
| C94 | -3.964168362 | 11.016780133 | 1.929026041  |
| C95 | -3.908787188 | 10.110180419 | 0.721225368  |

|       |               |               |              |
|-------|---------------|---------------|--------------|
| C96   | -4.768782503  | 10.328261837  | -0.366808992 |
| C97   | -2.966173635  | 9.073109731   | 0.625301176  |
| C98   | -4.686290469  | 9.549004114   | -1.522173470 |
| C99   | -2.853193854  | 8.297957259   | -0.533396980 |
| C100  | -3.712525091  | 8.551664797   | -1.600925019 |
| C101  | 6.832388798   | -3.849364777  | -7.292973627 |
| C102  | 5.362172884   | -3.464515263  | -7.310889592 |
| C103  | 3.669299719   | -1.885260661  | -6.410069415 |
| C104  | 3.502739004   | -0.468184381  | -6.969085845 |
| C105  | 3.961420144   | 1.905486931   | -6.564824255 |
| C106  | 5.146537768   | 2.793965560   | -6.196051109 |
| C107  | 7.195692387   | 3.135669478   | -4.900864811 |
| C108  | 8.491429132   | 2.939952738   | -5.661082014 |
| C109  | 0.650050471   | -2.633710489  | -9.814763383 |
| C110  | -0.298697074  | -1.427430282  | -9.809790646 |
| C111  | 0.529146708   | -3.411075106  | -8.483766421 |
| C112  | 1.154845975   | -4.813997451  | -8.600948248 |
| C113  | 1.313295913   | -5.449143075  | -7.237844558 |
| C114  | -0.682280069  | 0.883131444   | -9.103764930 |
| C115  | 0.136496310   | 2.132762002   | -9.363504418 |
| C116  | -1.555047056  | 0.935511418   | -7.826051437 |
| C117  | -0.756426269  | 0.679567244   | -6.573633333 |
| C118  | -0.068119127  | 1.716912136   | -5.924422940 |
| C119  | -0.615631622  | -0.630312102  | -6.082077159 |
| C120  | 0.762710450   | 1.439209506   | -4.833450417 |
| C121  | 0.217328904   | -0.905507569  | -4.993989320 |
| C122  | 0.919976667   | 0.129027078   | -4.371197084 |
| C123  | 8.376370394   | -6.874096811  | -1.945168315 |
| C124  | 9.088809354   | -7.226190716  | -0.628882617 |
| C125  | 6.894041249   | -7.277444976  | -1.942612666 |
| C126  | 6.088530570   | -6.819956835  | -3.120105310 |
| C127  | 6.161320557   | -7.283379798  | -4.418550503 |
| C128  | 4.482165592   | -5.851876359  | -4.237569576 |
| C129  | 9.464850236   | -8.792823930  | 1.195357844  |
| C130  | 10.970320224  | -8.703228142  | 1.081686159  |
| C131  | -0.128387785  | -6.897108231  | -0.432076221 |
| C132  | 1.177515642   | -6.806011073  | 0.309350418  |
| C133  | 2.434286544   | -7.098138664  | -0.604844664 |
| C134  | 2.296220324   | -8.506516667  | -1.250600423 |
| C135  | 3.560868895   | -8.916846278  | -2.023016417 |
| C136  | 3.583091742   | -10.362907520 | -2.428771844 |
| C137  | 3.663162621   | -7.157922989  | 0.353232000  |
| C138  | 4.190616846   | -1.028439734  | -0.818792279 |
| Fe139 | 4.874864839   | -2.200017174  | -2.273993646 |
| Fe140 | 2.916886774   | 0.434081326   | -0.396986334 |
| Fe141 | 5.266255880   | -0.077151877  | 0.642681405  |
| Fe142 | 5.078264024   | 0.352518811   | -1.929136500 |
| Fe143 | 4.703839160   | 2.428304858   | -0.324683940 |
| Fe144 | 4.900480747   | -2.571933792  | 0.302218567  |
| Fe145 | 2.635212715   | -2.219685463  | -0.981642205 |
| H146  | -6.494353594  | -6.438258628  | -2.810072358 |
| H147  | -5.985240695  | -5.416493203  | -3.976003936 |
| H148  | -9.629036030  | -3.321752152  | -3.310999462 |
| H149  | -8.207431714  | -4.767854479  | -4.528898223 |
| H150  | -8.824220696  | -5.978653343  | -3.409612278 |
| H151  | -8.214763536  | -1.656100223  | -1.542319807 |
| H152  | -10.356192960 | -4.371132645  | -0.650250330 |
| H153  | -9.976225487  | -1.627112284  | -1.811053575 |
| H154  | -10.868017911 | -5.212629689  | 1.460255069  |
| H155  | -8.061638857  | -5.225159029  | 0.286575645  |
| H156  | -10.594662604 | -3.598423249  | 2.156332639  |

|      |              |              |               |
|------|--------------|--------------|---------------|
| H157 | -3.981275853 | -2.418428714 | 1.682180117   |
| H158 | -6.277303778 | -3.530350788 | 0.355637036   |
| H159 | -6.097582214 | -6.281937289 | 0.979818783   |
| H160 | -6.990591004 | 0.145423587  | 4.324682386   |
| H161 | -7.519724594 | -1.862522525 | 2.294276430   |
| H162 | -6.668839590 | -6.306412927 | 2.666604277   |
| H163 | -5.149616909 | -1.536221194 | 0.671192987   |
| H164 | -7.787721034 | -3.395632906 | 4.588861719   |
| H165 | -8.515795803 | -0.737440790 | 4.049650433   |
| H166 | -2.089019702 | -4.081113982 | 3.172310696   |
| H167 | -1.253924738 | -3.118851777 | 1.927557176   |
| H168 | -0.341450345 | -3.753640002 | 3.310853917   |
| H169 | -2.578597952 | -1.643731720 | 3.457986790   |
| H170 | -8.090781451 | -4.616767374 | 6.518135133   |
| H171 | -3.281566458 | 1.551800858  | 4.130577346   |
| H172 | -5.173956329 | -0.593110099 | 7.572633948   |
| H173 | -4.822927911 | 2.825787876  | 8.008003504   |
| H174 | -0.537346639 | -0.746596442 | 2.399561425   |
| H175 | 0.463129336  | -1.304215730 | 3.746225461   |
| H176 | 6.500313943  | 0.081259143  | 8.052089878   |
| H177 | -4.092280744 | 3.120328489  | 4.359797151   |
| H178 | -4.968880886 | 3.836786464  | 6.549863290   |
| H179 | -2.454528127 | 2.865521481  | 5.006071586   |
| H180 | -3.386433544 | 3.633893199  | 7.340106061   |
| H181 | -4.995344920 | 1.406041378  | 5.957565073   |
| H182 | -2.116374964 | 1.365735309  | 7.014473870   |
| H183 | -3.590458741 | -0.512991747 | 5.318561845   |
| H184 | -0.740850092 | -0.017134252 | 4.004878921   |
| H185 | 1.427433266  | 4.179421105  | 1.511021102   |
| H186 | 0.238455551  | 4.868787270  | 2.661360630   |
| H187 | 2.146099385  | 4.966728182  | 3.779805111   |
| H188 | 1.520248216  | 4.165031775  | 6.233743440   |
| H189 | 4.119117873  | 3.454383693  | 3.935454944   |
| H190 | 5.583026015  | 1.471427416  | 4.154828161   |
| H191 | 3.555343114  | 0.377925714  | 7.807618710   |
| H192 | -3.750500235 | -2.983822893 | 5.296421998   |
| H193 | -3.803071573 | -6.178734732 | 5.638130760   |
| H194 | -3.909850376 | -5.691784045 | 7.344822107   |
| H195 | -5.464857020 | -4.550246613 | 5.086646933   |
| H196 | -7.750143910 | -3.171733138 | 7.501506661   |
| H197 | 2.069169325  | 2.350642916  | 7.570401319   |
| H198 | -0.798786668 | -2.846246309 | 5.632785833   |
| H199 | -5.692281655 | 0.265026346  | 10.162410011  |
| H200 | -5.923346119 | -1.407025919 | 9.582053561   |
| H201 | -3.265913083 | -1.629483100 | 10.183212418  |
| H202 | 7.969573672  | -8.626413134 | 7.258001319   |
| H203 | -0.438695577 | -5.333477720 | -4.789664993  |
| H204 | -0.249026098 | -8.731006495 | 0.160922102   |
| H205 | 0.496371136  | -5.454066330 | -9.205505449  |
| H206 | 2.131978555  | -4.753648632 | -9.102614259  |
| H207 | -0.528480411 | -3.516584993 | -8.195565001  |
| H208 | 1.042563336  | 1.966139219  | -9.993107394  |
| H209 | 0.244679548  | -3.276819206 | -10.610739686 |
| H210 | -2.363042775 | -1.467549487 | -3.660716535  |
| H211 | -3.495236979 | -4.168099795 | -2.749983897  |
| H212 | 1.070891964  | -0.296641898 | -8.736493755  |
| H213 | -1.371722525 | 0.828183750  | -9.969878169  |
| H214 | 2.493827695  | -1.750980546 | -9.463712536  |
| H215 | -0.593813714 | -5.121857750 | -3.046107108  |
| H216 | 1.016468370  | -2.828222448 | -7.687468541  |
| H217 | 2.556482861  | -3.080676121 | -10.428909000 |

|      |              |              |              |
|------|--------------|--------------|--------------|
| H218 | -5.421086456 | -2.354484673 | -5.391850670 |
| H219 | -3.033458397 | -1.600041591 | -2.051879846 |
| H220 | 3.194552563  | -4.864509773 | -7.250499550 |
| H221 | -1.940299843 | -3.619655105 | -2.116180214 |
| H222 | -4.359974760 | 3.057306709  | 1.901374385  |
| H223 | -3.424366999 | 0.943346120  | 0.561578275  |
| H224 | -8.758160626 | 1.602024337  | 0.637124752  |
| H225 | -6.950149347 | 0.948720854  | -1.647138755 |
| H226 | -6.559479938 | 4.960762531  | -0.057986494 |
| H227 | -8.194602282 | 9.684651698  | 1.552063173  |
| H228 | -7.821461647 | 6.047469475  | 2.680938206  |
| H229 | -8.686733394 | 6.501500240  | 0.093297974  |
| H230 | -5.894672217 | 7.584778522  | 0.827115513  |
| H231 | -9.049048400 | 10.895546325 | -2.417859305 |
| H232 | -2.851203217 | 4.542410700  | 0.667392284  |
| H233 | -3.964340525 | 4.660254022  | -0.698706718 |
| H234 | -8.894506043 | 11.613802917 | 0.030968615  |
| H235 | -7.406282499 | 6.722124676  | -1.099659503 |
| H236 | -5.531282634 | 2.438834610  | -0.568292692 |
| H237 | -7.566452894 | 0.298132046  | 0.626479261  |
| H238 | -8.883370017 | 3.010342562  | -3.698917256 |
| H239 | -1.067139358 | 1.449981593  | -2.878389798 |
| H240 | -9.379652736 | 1.309595592  | -3.789418646 |
| H241 | 8.354704053  | 1.245921902  | 7.123767298  |
| H242 | 7.106096007  | 1.699765556  | 6.166968995  |
| H243 | 2.727206258  | 5.875631063  | 0.129787733  |
| H244 | -0.148973905 | 5.989263330  | 0.642383050  |
| H245 | 2.541791252  | 8.092360707  | 1.574583660  |
| H246 | -1.998586332 | 3.775382088  | -2.228908517 |
| H247 | -2.970449294 | 5.005248631  | -4.042246999 |
| H248 | -2.943451138 | 6.219443247  | -3.032123663 |
| H249 | -3.111069173 | 2.324471897  | -5.257944871 |
| H250 | -4.643438089 | 2.452460412  | -6.172536726 |
| H251 | 2.005370887  | 12.308153516 | -0.771298506 |
| H252 | 0.769953150  | 13.589912184 | -0.924684776 |
| H253 | 1.600201848  | 10.250580269 | -1.789655052 |
| H254 | 0.013585198  | 9.808578207  | -2.378602752 |
| H255 | 0.685281849  | 9.725809223  | -5.770691952 |
| H256 | 0.649295952  | 5.180939216  | -5.719858153 |
| H257 | -5.374041986 | 9.720215642  | -2.354374137 |
| H258 | -2.300620385 | 8.845079004  | 1.463502451  |
| H259 | -1.858107458 | 8.375980573  | -3.741239056 |
| H260 | 3.185614940  | 4.980170347  | -2.349543328 |
| H261 | 4.403123676  | 6.780389491  | -1.228820042 |
| H262 | 0.761964920  | 4.898531005  | -3.054286160 |
| H263 | -7.103747144 | 0.658427383  | -4.076244282 |
| H264 | 6.136518219  | 9.489321658  | -1.608812913 |
| H265 | -4.485012009 | 0.062100123  | -5.133983542 |
| H266 | 3.571338998  | 5.961065608  | -3.764544261 |
| H267 | -2.078210207 | 7.534409556  | -0.617644987 |
| H268 | -5.004964594 | 4.302968758  | -4.567545258 |
| H269 | 5.242130170  | 9.946250989  | -0.144239896 |
| H270 | 1.341646318  | 8.208666308  | -6.277591951 |
| H271 | -1.412696207 | 9.695337106  | -4.758308157 |
| H272 | -3.779315468 | -2.659147440 | -5.353441776 |
| H273 | -5.190637799 | -2.490716017 | -3.091313991 |
| H274 | -5.522084961 | 11.116805669 | -0.312687194 |
| H275 | -4.360282535 | 2.183932171  | -3.126995194 |
| H276 | 2.174985971  | 7.834598183  | -2.895946961 |
| H277 | 1.827091291  | 6.463793266  | -5.445740313 |
| H278 | 1.929914499  | 4.149296647  | -4.129520956 |

|      |              |               |              |
|------|--------------|---------------|--------------|
| H279 | -0.903395395 | 6.346724389   | -4.141948319 |
| H280 | 1.036316061  | 9.129457012   | 3.812781332  |
| H281 | 0.871342277  | 10.273471719  | 0.694675870  |
| H282 | 1.252133380  | 13.085904200  | 1.423816413  |
| H283 | 2.729354844  | 9.447760745   | 3.381812028  |
| H284 | -1.435337463 | 11.027425930  | 1.597966347  |
| H285 | 7.453824980  | -2.957642073  | -7.126471212 |
| H286 | 6.960114265  | -4.498678674  | -6.401822413 |
| H287 | 8.444912400  | -5.779686401  | -2.029221585 |
| H288 | 8.107142682  | -4.960736504  | -8.431993664 |
| H289 | 6.523673994  | -5.221019512  | -8.761897722 |
| H290 | 6.052795378  | 4.295678086   | 2.046582606  |
| H291 | 5.958486265  | 6.975497986   | 3.599137119  |
| H292 | 6.824810944  | 7.511283859   | -0.581627769 |
| H293 | 4.589645979  | 5.305122453   | 2.291966825  |
| H294 | 7.437074537  | 7.441037495   | 3.079494523  |
| H295 | 7.372727054  | 2.940656899   | -3.831681298 |
| H296 | 7.265792410  | 6.194838477   | 1.090657727  |
| H297 | 2.336320177  | -7.465876515  | 5.883435342  |
| H298 | 4.672581848  | -8.715021856  | 4.339487831  |
| H299 | 6.010261507  | 1.372141270   | -4.942228076 |
| H300 | 3.228706585  | -0.557703840  | 4.368366358  |
| H301 | 3.833984091  | 1.964221634   | -7.653754571 |
| H302 | 0.315168171  | -1.924778212  | -4.615667169 |
| H303 | 3.070059538  | 2.377919663   | -6.117981932 |
| H304 | 1.932294708  | -4.913080810  | 5.152302567  |
| H305 | 4.379963158  | 0.214670247   | -5.261401919 |
| H306 | 2.256028150  | -5.380288159  | 3.481305145  |
| H307 | 2.452212534  | -7.696884096  | 4.125375429  |
| H308 | 4.538797471  | -6.182136659  | 4.147226334  |
| H309 | 4.179610389  | -5.804123124  | 5.840770743  |
| H310 | -2.343478092 | 0.176962499   | -7.936030818 |
| H311 | 2.577356919  | -10.026828682 | 6.039309073  |
| H312 | 1.908882726  | -12.298199238 | 4.065907612  |
| H313 | 1.561888634  | -0.076385806  | -3.513558051 |
| H314 | 2.353344355  | -12.387159837 | 6.946908228  |
| H315 | 0.957597285  | -12.525965565 | 6.100209957  |
| H316 | 3.993067849  | -3.737999871  | 3.329494681  |
| H317 | 1.297211549  | 2.241521361   | -4.323548785 |
| H318 | -1.174339715 | -1.442856426  | -6.552163266 |
| H319 | 6.455834165  | -10.704944039 | 0.623358687  |
| H320 | 6.830432028  | -8.379434535  | -1.899003807 |
| H321 | 5.147885598  | -8.914926566  | 1.645878352  |
| H322 | 6.082307784  | -11.243230754 | -0.772855177 |
| H323 | 8.410418003  | 2.326478128   | -6.591536557 |
| H324 | 5.577012146  | -5.779174044  | 1.561434294  |
| H325 | 1.194057746  | -7.493786879  | 1.168019775  |
| H326 | 5.735532590  | -1.937139950  | -5.990682792 |
| H327 | 2.103471367  | -9.238773659  | -0.450683623 |
| H328 | 4.893981441  | -6.800743594  | -6.080209929 |
| H329 | 3.618059549  | -5.259993293  | -4.512189674 |
| H330 | 3.248957656  | -13.090828724 | 4.901933702  |
| H331 | 3.957567852  | -1.519693283  | 3.118763990  |
| H332 | 6.897362606  | -6.868468765  | 3.242185560  |
| H333 | 6.413734430  | -4.586733137  | 2.105963012  |
| H334 | 6.507386898  | -7.996247668  | 5.314258395  |
| H335 | 2.129639626  | -3.220230769  | 6.353582967  |
| H336 | 2.641137182  | -11.658467670 | -3.434881319 |
| H337 | 3.640640008  | -8.292217233  | -2.924551623 |
| H338 | 4.456313332  | -8.749502992  | -1.415151844 |
| H339 | 1.435584301  | -8.502237394  | -1.934875371 |

|       |               |               |              |
|-------|---------------|---------------|--------------|
| H340  | 3.425804200   | -1.911347272  | -5.336389804 |
| H341  | -0.176661844  | 2.741308042   | -6.290615503 |
| H342  | -2.038080641  | 1.924356457   | -7.802559895 |
| H343  | 1.292127915   | -5.774265025  | 0.666453100  |
| H344  | 6.788165651   | -8.409111113  | 3.045304615  |
| H345  | 5.363562322   | -10.114513078 | 2.610452108  |
| H346  | 1.820732695   | -1.565679008  | 5.982794465  |
| H347  | 6.831765370   | -7.993691068  | -4.888259279 |
| H348  | 6.421694866   | -6.893687583  | -1.029030918 |
| H349  | 2.991203432   | -2.544272401  | -6.954935224 |
| H350  | 6.901361394   | 4.192398317   | -5.009569453 |
| H351  | 5.052914004   | -1.253630767  | 6.604832549  |
| H352  | 5.942165708   | -0.745418719  | 5.147150339  |
| H353  | 10.056431153  | -7.100479213  | -3.100245269 |
| H354  | 9.170603682   | -8.469837517  | -2.975469830 |
| H355  | 9.213190929   | -9.845484385  | 1.403540991  |
| H356  | 8.059611540   | -9.032297985  | -0.387539223 |
| H357  | 11.374667579  | -8.840263051  | 0.050678506  |
| H358  | 9.119968770   | -8.190514789  | 2.051338946  |
| H359  | 8.271812688   | -1.621519667  | 6.176296084  |
| H360  | -2.545179940  | 13.243004562  | 3.667081613  |
| H361  | 6.566354308   | -8.297529970  | 8.310017549  |
| H362  | 6.815764564   | -5.770493381  | 7.258816839  |
| H363  | -3.514997141  | 12.833418289  | 0.817490982  |
| H364  | -3.589348577  | 10.495615957  | 2.823895004  |
| H365  | -5.002298052  | 11.315952733  | 2.134629018  |
| H366  | -4.276685257  | 7.998537818   | -3.381207601 |
| H367  | 0.015404726   | -1.165070783  | -0.312468140 |
| Mo368 | 4.018114275   | -4.599708449  | -1.279134056 |
| N369  | -6.753763772  | -6.040143969  | -3.716523328 |
| N370  | -9.046189688  | -3.361961424  | -2.478388933 |
| N371  | -10.008495405 | -3.844110851  | 0.147175196  |
| N372  | -7.929897707  | -5.342783665  | 1.291285106  |
| N373  | -5.777748135  | -3.435906327  | 1.241247356  |
| N374  | -6.885023478  | -1.491583802  | 3.005659764  |
| N375  | -7.424739013  | -2.966846448  | 5.444275780  |
| N376  | -5.173105943  | -4.650483530  | 6.064041589  |
| N377  | -2.812775502  | -3.237462974  | 5.599671408  |
| N378  | -2.908105363  | -0.300051227  | 6.049417060  |
| N379  | -4.638660466  | -0.297658741  | 8.392457689  |
| N380  | 1.837529037   | -12.010714342 | 6.148834347  |
| N381  | 3.281948259   | -9.906426221  | 5.303552738  |
| N382  | 3.386296312   | -3.762924615  | 4.155025434  |
| N383  | 2.149192960   | -2.473689329  | 5.667301434  |
| N384  | 3.267827277   | -1.459800341  | 3.897124178  |
| N385  | 6.155766599   | -8.135863662  | 6.286696172  |
| N386  | -4.518774428  | -1.985125083  | -5.083415341 |
| N387  | -0.925414275  | -4.920994067  | -3.990170083 |
| N388  | -4.819770397  | 0.502404667   | -4.262523060 |
| N389  | -7.319318962  | 1.633791816   | -3.883327001 |
| N390  | -7.724887457  | 1.409468198   | -1.149494272 |
| N391  | -5.766298713  | 2.823709103   | 0.345691930  |
| N392  | -2.169430268  | 2.903319062   | -1.714065137 |
| N393  | -2.184999700  | 0.739752751   | -1.183758371 |
| N394  | -6.231460359  | 5.499559962   | 0.740409481  |
| N395  | -8.454802769  | 8.955345198   | -1.686180861 |
| N396  | -8.708499158  | 10.671093306  | -0.301456392 |
| N397  | 7.688089112   | 0.899510708   | 6.429951535  |
| N398  | 6.777348520   | 6.657644039   | 3.069922587  |
| N399  | 6.071395314   | 8.024362241   | -0.132027762 |
| N400  | 3.801985352   | 7.495420665   | -1.669845434 |

|      |              |               |               |
|------|--------------|---------------|---------------|
| N401 | -0.086900864 | 6.787446730   | -4.620817482  |
| N402 | 0.762048974  | 8.724888264   | -5.625689384  |
| N403 | -1.129542341 | 8.837477992   | -4.291575322  |
| N404 | 1.808274318  | 6.348497905   | 0.038838842   |
| N405 | 1.638022848  | 8.400994693   | 1.945375411   |
| N406 | 0.850615333  | 11.056523181  | 1.349909657   |
| N407 | 0.598530605  | 10.466211101  | -1.864194987  |
| N408 | -1.734527231 | 11.998362897  | 1.555627731   |
| N409 | 7.209528809  | -4.487581321  | -8.558584407  |
| N410 | 5.031383049  | -2.371232167  | -6.598154993  |
| N411 | 4.026875852  | 0.504017349   | -6.195730791  |
| N412 | 6.111719732  | 2.296531759   | -5.380714829  |
| N413 | 2.006660440  | -2.244183317  | -10.222141403 |
| N414 | 0.159706742  | -0.296117652  | -9.207811672  |
| N415 | 9.095324116  | -7.454592818  | -3.096794918  |
| N416 | 5.031567071  | -5.916752573  | -3.028420077  |
| N417 | 5.141264274  | -6.659632290  | -5.104750734  |
| N418 | 8.799956350  | -8.421833034  | -0.043733352  |
| N419 | 0.328409288  | 1.517093858   | 0.445630235   |
| N420 | 1.253129492  | 1.010525338   | 0.033098769   |
| O421 | -7.214627991 | -4.284866754  | -1.490045044  |
| O422 | -8.878988827 | -1.996042507  | 0.855367856   |
| O423 | -8.697074219 | -4.770571608  | 3.368205526   |
| O424 | -5.062937527 | -4.438676674  | 3.153997006   |
| O425 | -4.754166562 | -0.950762046  | 3.589276773   |
| O426 | -6.844227802 | -1.043405431  | 6.531429756   |
| O427 | -5.809119094 | -4.567190174  | 8.269564997   |
| O428 | -1.543973119 | -4.935730651  | 6.489426294   |
| O429 | -0.867629766 | -0.778170726  | 6.961896168   |
| O430 | -3.021998207 | 1.012077318   | 9.297681148   |
| O431 | -4.231206329 | -1.023008576  | 11.878124787  |
| O432 | 4.362416617  | -11.131570717 | 3.664454237   |
| O433 | 4.363493591  | -8.684772766  | 7.616691758   |
| O434 | 8.597137117  | -6.256431437  | 8.128088254   |
| O435 | -5.404794267 | -0.104549545  | -2.124157354  |
| O436 | -2.334271083 | -3.794078298  | -5.372661808  |
| O437 | -6.439558957 | 3.732084820   | -3.676173040  |
| O438 | -4.128732046 | 4.093765571   | -4.987897491  |
| O439 | -9.770369957 | 2.448439407   | -1.316212320  |
| O440 | -6.933793232 | 2.434012916   | 2.270808452   |
| O441 | -4.865047820 | 5.492675950   | 2.570269024   |
| O442 | -7.286240041 | 7.990514910   | 3.009882025   |
| O443 | 7.624135226  | -2.219108086  | 8.018693387   |
| O444 | 2.219452645  | 4.142839088   | 5.554826924   |
| O445 | 4.647163760  | 8.127844624   | 1.645120621   |
| O446 | 3.410536057  | 9.744920090   | -1.945491056  |
| O447 | 0.282055517  | 7.282478050   | -1.389626860  |
| O448 | -0.454952046 | 7.679348158   | 2.538546565   |
| O449 | 2.215706291  | 5.488356651   | 2.954590915   |
| O450 | 1.477893360  | 11.760164896  | 3.434787377   |
| O451 | -1.113896241 | 14.123753236  | 1.012417030   |
| O452 | -1.107689856 | 11.985641600  | -1.794814172  |
| O453 | -4.350706517 | 13.953117468  | 3.026155585   |
| O454 | -3.547881461 | 7.789088189   | -2.765804213  |
| O455 | 4.530775764  | -4.171146473  | -7.937380563  |
| O456 | 2.937400564  | -0.255219877  | -8.064999134  |
| O457 | 5.163110434  | 3.957044609   | -6.635226641  |
| O458 | 9.556250203  | 3.414668087   | -5.299682619  |
| O459 | -1.431801355 | -1.496764158  | -10.316610148 |
| O460 | 0.394580949  | -5.989252011  | -6.630734936  |
| O461 | 2.533495942  | -5.359907908  | -6.671761959  |

|  |                          |              |               |              |
|--|--------------------------|--------------|---------------|--------------|
|  | O462                     | -0.169558823 | 3.251950926   | -8.977556916 |
|  | O463                     | 9.970907602  | -6.486345427  | -0.154156988 |
|  | O464                     | 11.713565790 | -8.572546660  | 2.044848496  |
|  | O465                     | -0.652324322 | -5.998964977  | -1.070234910 |
|  | O466                     | -0.769721955 | -8.113976467  | -0.387720112 |
|  | O467                     | 4.433792592  | -11.187135532 | -2.099170077 |
|  | O468                     | 2.541792303  | -10.703683498 | -3.232701761 |
|  | O469                     | 4.582287400  | -6.276776049  | 0.131247825  |
|  | O470                     | 3.727337675  | -8.047035693  | 1.235276417  |
|  | O471                     | 2.577896901  | -6.111758862  | -1.559220389 |
|  | O472                     | 7.173448466  | -7.726301092  | 3.656637178  |
|  | O473                     | 6.063241033  | -5.460895497  | 2.365468377  |
|  | O474                     | -2.380026193 | 5.532765620   | -3.445526997 |
|  | O475                     | 6.812034199  | -11.254683067 | -0.119851263 |
|  | O476                     | 5.860432793  | -9.537491482  | 1.974029410  |
|  | S477                     | 4.864929824  | 4.719435393   | -0.042108943 |
|  | S478                     | 3.418966011  | 1.877015202   | -2.064810577 |
|  | S479                     | 2.995368203  | -3.245685435  | -2.936200452 |
|  | S480                     | 3.730162766  | 1.369881141   | 1.484312129  |
|  | S481                     | 0.476892726  | -1.937792201  | -1.329107602 |
|  | S482                     | 5.772225075  | -0.769644576  | -3.738362251 |
|  | S483                     | 2.991338424  | -3.650582908  | 0.680842138  |
|  | S484                     | 6.654158808  | 1.256504131   | -0.632598952 |
|  | S485                     | 6.207731389  | -3.648272124  | -1.163675224 |
|  | S486                     | 5.951254432  | -1.696230461  | 2.033156378  |
|  | <b>9<sup>-1</sup>(a)</b> |              |               |              |
|  | Fe( 139)                 | 0.556        | -2.370        |              |
|  | Fe( 140)                 | 0.340        | -0.110        |              |
|  | Fe( 141)                 | 0.562        | -2.771        |              |
|  | Fe( 142)                 | 0.571        | 2.696         |              |
|  | Fe( 143)                 | 0.610        | 3.201         |              |
|  | Fe( 144)                 | 0.507        | 2.299         |              |
|  | Fe( 145)                 | 0.385        | -1.522        |              |
|  | <b>S=1</b>               |              |               |              |
|  | bm2cnx2622n2x35.car_2    |              |               |              |
|  | C1                       | -8.262910333 | -4.504339866  | -0.175818501 |
|  | C2                       | -8.436501069 | -5.660537780  | -1.167427646 |
|  | C3                       | -9.261520591 | -2.468012431  | 0.769234772  |
|  | C4                       | -9.071145414 | -2.739956298  | 2.260016819  |
|  | C5                       | -9.468519848 | -4.235292083  | 4.150498733  |
|  | C6                       | -8.025375946 | -4.588222133  | 4.525573742  |
|  | C7                       | -5.874025105 | -5.468780152  | 3.751917764  |
|  | C8                       | -4.999704143 | -4.212768841  | 3.746896430  |
|  | C9                       | -4.541345549 | -2.030083044  | 2.765757795  |
|  | C10                      | -4.755453668 | -1.160662446  | 4.015213744  |
|  | C11                      | -6.290952952 | -0.366970289  | 5.725642813  |
|  | C12                      | -5.744962491 | -0.987945204  | 7.019575409  |
|  | C13                      | -5.664225714 | -2.974539943  | 8.449648098  |
|  | C14                      | -4.246591820 | -3.534410233  | 8.615912362  |
|  | C15                      | -2.320107894 | -4.606687962  | 7.530077275  |
|  | C16                      | -1.133699365 | -3.773575027  | 7.034542222  |
|  | C17                      | -0.455864692 | -1.731970371  | 5.799647567  |
|  | C18                      | -0.376168992 | -0.388477103  | 6.548291858  |
|  | C19                      | -0.679956661 | -1.593413113  | 4.270009710  |
|  | C20                      | 0.262083631  | -0.563869358  | 3.638713319  |
|  | C21                      | -0.536282935 | -2.955033992  | 3.580262813  |
|  | C22                      | -1.534048618 | 1.663519534   | 7.266428710  |
|  | C23                      | -1.691166357 | 1.479933358   | 8.789662471  |
|  | C24                      | -2.604656294 | 2.607710609   | 6.667318663  |
|  | C25                      | -2.719359532 | 3.899991125   | 7.485078903  |
|  | C26                      | -2.280059466 | 2.933303355   | 5.203875568  |
|  | C27                      | -2.924313346 | 0.506761672   | 10.640118189 |
|  | C28                      | -1.680047999 | 0.071541798   | 11.390133656 |
|  | C29                      | 3.888579211  | -11.606537668 | 5.521061541  |
|  | C30                      | 4.670122191  | -10.461932019 | 4.877417786  |
|  | C31                      | 5.238921464  | -8.046517671  | 5.165321772  |
|  | C32                      | 6.333707771  | -7.739224273  | 6.205795572  |
|  | C33                      | 4.208952089  | -6.906689146  | 5.073647581  |
|  | C34                      | 4.825956948  | -5.570735527  | 4.654621298  |



|     |              |              |              |
|-----|--------------|--------------|--------------|
| C35 | 3.752747431  | -4.548360261 | 4.290402301  |
| C36 | 3.966622893  | -2.062437227 | 4.110635512  |
| C37 | 8.687578559  | -7.134285136 | 6.528236421  |
| C38 | 9.086927126  | -5.673941654 | 6.527495343  |
| C39 | -5.137713482 | -2.100404611 | -2.277252579 |
| C40 | -5.424128477 | -0.608524371 | -2.037165227 |
| C41 | -3.639783025 | -2.348523085 | -1.990797060 |
| C42 | -3.215237121 | -3.828318383 | -1.882314557 |
| C43 | -2.773861842 | -4.475917937 | -3.193109712 |
| C44 | -5.730543194 | 1.545257272  | -3.175799942 |
| C45 | -7.082344051 | 2.096423191  | -2.702602924 |
| C46 | -5.338919592 | 2.151461630  | -4.538207869 |
| C47 | -9.214046145 | 1.578133732  | -1.611078244 |
| C48 | -8.994493376 | 1.704883611  | -0.094505711 |
| C49 | -7.488124912 | 1.266567951  | 1.804998542  |
| C50 | -6.347184883 | 2.216738588  | 2.174279856  |
| C51 | -4.459242426 | 3.606698760  | 1.464348565  |
| C52 | -4.962234298 | 4.974803176  | 1.981308136  |
| C53 | -3.615497941 | 3.921221555  | 0.220361467  |
| C54 | -2.873917038 | 2.785424097  | -0.414386239 |
| C55 | -2.415836219 | 1.574565915  | 0.042366282  |
| C56 | -1.688998481 | 1.810512184  | -2.039521493 |
| C57 | -6.636018699 | 6.755380893  | 1.610239266  |
| C58 | -6.913641029 | 6.996362174  | 3.091495896  |
| C59 | -7.932994655 | 6.889883388  | 0.776734203  |
| C60 | -8.353955946 | 8.289654899  | 0.432688431  |
| C61 | -8.379984618 | 9.439142921  | 1.198707678  |
| C62 | -9.108658532 | 9.859246270  | -0.851512171 |
| C63 | 8.137407538  | 0.701757995  | 5.394565053  |
| C64 | 8.945974409  | -0.579689155 | 5.469725171  |
| C65 | 6.743870555  | 0.322549878  | 4.828945058  |
| C66 | 5.807510968  | 1.505101759  | 4.748038121  |
| C67 | 4.984903715  | 1.860955723  | 5.832926648  |
| C68 | 5.749395720  | 2.299205952  | 3.589492258  |
| C69 | 4.131810428  | 2.967800752  | 5.765882296  |
| C70 | 4.911674280  | 3.412106733  | 3.511659197  |
| C71 | 4.101309936  | 3.743828582  | 4.600642653  |
| C72 | 6.413849161  | 6.516766926  | -0.474064479 |
| C73 | 5.516993209  | 7.626509557  | -1.036518751 |
| C74 | 5.572659204  | 5.277105442  | -0.139921389 |
| C75 | 4.911403098  | 8.950493597  | -3.017024579 |
| C76 | 3.465838655  | 8.568669735  | -3.340380719 |
| C77 | 1.809247468  | 6.740169225  | -3.491046946 |
| C78 | 0.972522642  | 6.687990830  | -2.194843671 |
| C79 | 1.907512357  | 5.377342026  | -4.198588613 |
| C80 | 0.598465199  | 4.676223192  | -4.574891591 |
| C81 | -0.238254251 | 5.299824725  | -5.705894261 |
| C82 | -1.457576292 | 7.473429921  | -5.596891097 |
| C83 | 0.889971693  | 6.298883188  | 0.211394108  |
| C84 | 0.812336125  | 7.675586035  | 0.902106688  |
| C85 | 1.464331559  | 5.287195022  | 1.211240495  |
| C86 | 2.055648839  | 9.699422404  | 1.487971995  |
| C87 | 1.559658465  | 11.073234660 | 1.045321728  |
| C88 | 0.439278938  | 12.427195360 | -0.673644948 |
| C89 | -0.908198411 | 12.962471108 | -0.146408074 |
| C90 | 0.456766408  | 12.397344361 | -2.218573979 |
| C91 | -0.564180102 | 11.416522159 | -2.780761280 |
| C92 | -3.026729335 | 12.414223880 | 0.969327669  |
| C93 | -2.985263133 | 13.499622733 | 2.040517945  |
| C94 | -3.732418529 | 11.149387813 | 1.528897522  |
| C95 | -3.919952667 | 10.091100950 | 0.466850373  |

|       |               |               |              |
|-------|---------------|---------------|--------------|
| C96   | -5.021854056  | 10.140468703  | -0.400937061 |
| C97   | -2.969332453  | 9.075769668   | 0.275306141  |
| C98   | -5.163385717  | 9.221096826   | -1.443153699 |
| C99   | -3.079236757  | 8.163966758   | -0.779140730 |
| C100  | -4.176676907  | 8.254077547   | -1.632586845 |
| C101  | 5.179865313   | -4.575971575  | -8.156060783 |
| C102  | 3.729317628   | -4.222390625  | -7.871335045 |
| C103  | 2.222566380   | -2.551218184  | -6.815183700 |
| C104  | 1.897566268   | -1.208538490  | -7.481291394 |
| C105  | 2.377456966   | 1.196827541   | -7.470853729 |
| C106  | 3.583763432   | 2.130363391   | -7.415606845 |
| C107  | 5.852784568   | 2.594079074   | -6.618455262 |
| C108  | 6.924851250   | 2.363500443   | -7.665271195 |
| C109  | -1.417021402  | -3.728565302  | -9.347125959 |
| C110  | -2.389463552  | -2.546859192  | -9.256419510 |
| C111  | -1.233457366  | -4.348773587  | -7.943476494 |
| C112  | -0.608505498  | -5.753945115  | -8.022737125 |
| C113  | -0.145348231  | -6.204976229  | -6.656047450 |
| C114  | -2.720802611  | -0.192757508  | -8.690484463 |
| C115  | -2.055996176  | 1.036010718   | -9.277259814 |
| C116  | -3.322944353  | -0.004240328  | -7.278720962 |
| C117  | -2.243650270  | -0.051902678  | -6.234928368 |
| C118  | -1.482816385  | 1.088486869   | -5.938754575 |
| C119  | -1.869326360  | -1.283961150  | -5.666964445 |
| C120  | -0.326975268  | 0.979611624   | -5.158681192 |
| C121  | -0.719886184  | -1.386809901  | -4.882622470 |
| C122  | 0.078286019   | -0.259777266  | -4.658229230 |
| C123  | 7.954784637   | -7.043267138  | -2.904866455 |
| C124  | 8.939938296   | -7.243548256  | -1.738636705 |
| C125  | 6.508572807   | -7.403910310  | -2.530065976 |
| C126  | 5.462242129   | -7.075460524  | -3.553200349 |
| C127  | 5.299619994   | -7.649258037  | -4.797573571 |
| C128  | 3.607074515   | -6.280045372  | -4.395736757 |
| C129  | 9.737340913   | -8.592833882  | 0.125422437  |
| C130  | 11.182581933  | -8.536279418  | -0.319039559 |
| C131  | -0.058726607  | -6.913495135  | 0.335939014  |
| C132  | 1.367762264   | -6.794899541  | 0.803290333  |
| C133  | 2.407853421   | -7.148571510  | -0.332144803 |
| C134  | 2.177099776   | -8.608767722  | -0.817904758 |
| C135  | 3.272147423   | -9.098106041  | -1.782048012 |
| C136  | 3.249588481   | -10.582107966 | -2.016615702 |
| C137  | 3.818698511   | -7.108386280  | 0.322534518  |
| C138  | 3.942698155   | -1.128096531  | -1.565675535 |
| Fe139 | 4.213918205   | -2.437271967  | -2.998123978 |
| Fe140 | 2.406987729   | 0.183276170   | -0.788292353 |
| Fe141 | 5.328565119   | -0.028994395  | -0.542286429 |
| Fe142 | 4.283823273   | 0.179906999   | -2.933765287 |
| Fe143 | 4.394963397   | 2.342524421   | -1.347514627 |
| Fe144 | 4.931812303   | -2.537955208  | -0.515198305 |
| Fe145 | 2.422543087   | -2.324614376  | -1.080733211 |
| H146  | -6.762637623  | -6.696912783  | -0.635525190 |
| H147  | -6.571761894  | -5.806376130  | -1.991050344 |
| H148  | -10.106458248 | -3.761699190  | -0.708162353 |
| H149  | -8.892126890  | -5.274491499  | -2.093424233 |
| H150  | -9.182074191  | -6.344555846  | -0.724617193 |
| H151  | -8.423304997  | -1.824430823  | 0.464917477  |
| H152  | -10.158327814 | -4.476686602  | 2.124790703  |
| H153  | -10.195586066 | -1.906159507  | 0.634750626  |
| H154  | -10.110589095 | -5.100829063  | 4.361127852  |
| H155  | -7.662993332  | -5.236313231  | 2.611582879  |
| H156  | -9.777258548  | -3.408526301  | 4.803487280  |

|      |              |              |               |
|------|--------------|--------------|---------------|
| H157 | -3.461959993 | -2.219161961 | 2.696926471   |
| H158 | -5.987404545 | -3.476379287 | 2.085293297   |
| H159 | -5.540730596 | -6.147566803 | 2.955267358   |
| H160 | -5.852649238 | 0.634672580  | 5.633254037   |
| H161 | -6.772742919 | -1.626749201 | 4.049998265   |
| H162 | -5.718849857 | -5.964999625 | 4.717264865   |
| H163 | -4.849856750 | -1.470111284 | 1.871131848   |
| H164 | -6.518398720 | -2.838002361 | 6.498394025   |
| H165 | -7.381187654 | -0.265435740 | 5.817352563   |
| H166 | -1.238601754 | -3.695199510 | 3.988324079   |
| H167 | -0.731210945 | -2.856573079 | 2.501759898   |
| H168 | 0.486554126  | -3.347326539 | 3.694692276   |
| H169 | -1.714345549 | -1.240014231 | 4.126852075   |
| H170 | -6.365801627 | -3.811666960 | 8.579809723   |
| H171 | -2.237937855 | 2.033140162  | 4.574147564   |
| H172 | -3.363145113 | 0.254264729  | 8.565100808   |
| H173 | -3.017933702 | 3.712439902  | 8.526581569   |
| H174 | 0.014462814  | -0.431816458 | 2.576106348   |
| H175 | 1.309112099  | -0.894713909 | 3.680814247   |
| H176 | 7.993953955  | 1.066822983  | 6.429537218   |
| H177 | -3.046507990 | 3.602663396  | 4.786044486   |
| H178 | -3.469717446 | 4.562312678  | 7.029234554   |
| H179 | -1.307763477 | 3.448358698  | 5.133802327   |
| H180 | -1.756452564 | 4.434768542  | 7.501525223   |
| H181 | -3.578077065 | 2.085369933  | 6.706355879   |
| H182 | -0.544463499 | 2.129683180  | 7.147300384   |
| H183 | -2.318058918 | 0.103701997  | 6.007159872   |
| H184 | 0.191903779  | 0.422530757  | 4.121768015   |
| H185 | 1.625728162  | 4.326536270  | 0.692850745   |
| H186 | 0.707406793  | 5.138405474  | 1.997041864   |
| H187 | 2.790496859  | 5.401136486  | 2.659358086   |
| H188 | 2.703470141  | 4.921760478  | 5.249572582   |
| H189 | 4.858379000  | 4.002107656  | 2.596365197   |
| H190 | 6.346516695  | 2.024944234  | 2.717007641   |
| H191 | 5.004206285  | 1.262491933  | 6.748332865   |
| H192 | -2.435464121 | -2.399277061 | 6.280075789   |
| H193 | -2.337139422 | -5.526597030 | 6.926649041   |
| H194 | -2.109805610 | -4.886787132 | 8.570664182   |
| H195 | -4.118739759 | -3.969098807 | 6.586515109   |
| H196 | -5.815939562 | -2.269332252 | 9.276665137   |
| H197 | 3.489934163  | 3.222179362  | 6.614023891   |
| H198 | 0.515951341  | -2.211032830 | 5.978391142   |
| H199 | -3.312379790 | 1.429304952  | 11.102416345  |
| H200 | -3.678242770 | -0.284541614 | 10.773454889  |
| H201 | -0.924877313 | -0.472354926 | 10.775782942  |
| H202 | 9.552471251  | -7.750080774 | 6.240350279   |
| H203 | -1.410352413 | -5.806142187 | -3.953539278  |
| H204 | -0.080265126 | -8.688459885 | 1.091155893   |
| H205 | -1.362634723 | -6.466792310 | -8.385106467  |
| H206 | 0.237164442  | -5.753877527 | -8.725291956  |
| H207 | -2.204481725 | -4.417798443 | -7.428574238  |
| H208 | -1.336588638 | 0.816490556  | -10.101620256 |
| H209 | -1.954584953 | -4.461595090 | -9.967717478  |
| H210 | -3.042205123 | -1.844266979 | -2.767458487  |
| H211 | -4.050533552 | -4.433800543 | -1.489167907  |
| H212 | -0.870969421 | -1.280935562 | -8.616633892  |
| H213 | -3.571964675 | -0.373515453 | -9.379724491  |
| H214 | 0.425556919  | -2.783851800 | -9.494176756  |
| H215 | -1.244634035 | -5.498413070 | -2.227005884  |
| H216 | -0.607433482 | -3.674918879 | -7.339227151  |
| H217 | 0.329622716  | -4.211519609 | -10.310775199 |

|      |               |              |              |
|------|---------------|--------------|--------------|
| H218 | -6.432712355  | -2.914606358 | -3.667223151 |
| H219 | -3.403600064  | -1.856880298 | -1.036461168 |
| H220 | 1.667393800   | -5.605626006 | -7.143078109 |
| H221 | -2.404307979  | -3.915786651 | -1.145999319 |
| H222 | -3.835037116  | 3.191451397  | 2.268800784  |
| H223 | -2.533564730  | 1.091974429  | 1.004565514  |
| H224 | -8.373961975  | 1.618654838  | 2.349683882  |
| H225 | -7.172747486  | 0.709616533  | -0.230772763 |
| H226 | -6.653466100  | 4.749015027  | 0.847219630  |
| H227 | -8.089662082  | 9.642262486  | 2.223807744  |
| H228 | -7.268781747  | 6.090936634  | 3.638660432  |
| H229 | -8.747975679  | 6.342763881  | 1.283205208  |
| H230 | -5.888912543  | 7.491018871  | 1.269439411  |
| H231 | -9.496719534  | 10.425098855 | -1.694492297 |
| H232 | -2.884708769  | 4.687046093  | 0.527248771  |
| H233 | -4.260782041  | 4.397140451  | -0.536526124 |
| H234 | -8.995645354  | 11.401795621 | 0.610985784  |
| H235 | -7.764606642  | 6.374690148  | -0.181941044 |
| H236 | -5.568957112  | 2.209830634  | 0.261520987  |
| H237 | -7.248492472  | 0.267410901  | 2.199783436  |
| H238 | -9.580933762  | 2.550689601  | -1.961653455 |
| H239 | -1.185321916  | 1.613939882  | -2.982672416 |
| H240 | -10.006833592 | 0.838174014  | -1.784110241 |
| H241 | 9.618132985   | 2.062000206  | 4.999043730  |
| H242 | 8.192603859   | 2.422604075  | 4.286310557  |
| H243 | 2.550882709   | 5.871880060  | -1.111847171 |
| H244 | -0.151099472  | 6.013154095  | 0.000639959  |
| H245 | 2.614583130   | 8.222066493  | 0.085575160  |
| H246 | -2.605808194  | 3.715904182  | -2.352149348 |
| H247 | -3.961964168  | 4.546113916  | -3.896958524 |
| H248 | -3.649862122  | 5.816135349  | -2.993910848 |
| H249 | -4.333925953  | 1.802779790  | -4.811277973 |
| H250 | -6.049394562  | 1.825343146  | -5.316486799 |
| H251 | 1.478356661   | 12.156535228 | -2.546744790 |
| H252 | 0.201269619   | 13.404129486 | -2.572217505 |
| H253 | 0.917349838   | 9.976610070  | -3.206925562 |
| H254 | -0.748214705  | 9.481221328  | -3.403471846 |
| H255 | -0.895655686  | 8.994237591  | -6.846374515 |
| H256 | -0.730298464  | 4.504989381  | -6.286897696 |
| H257 | -6.034583502  | 9.263048953  | -2.102475596 |
| H258 | -2.119287238  | 8.973164253  | 0.956433915  |
| H259 | -2.856925491  | 7.886213592  | -4.139302764 |
| H260 | 2.473738029   | 4.684360798  | -3.555998125 |
| H261 | 3.862773808   | 6.593011081  | -2.918333776 |
| H262 | -0.033751631  | 4.522095678  | -3.686571274 |
| H263 | -7.839157879  | 0.217548102  | -2.539477798 |
| H264 | 5.405328425   | 9.224335794  | -3.959304698 |
| H265 | -5.601543665  | -0.486681991 | -4.024792939 |
| H266 | 2.509817638   | 5.527432638  | -5.110148138 |
| H267 | -2.295698557  | 7.424466887  | -0.956016917 |
| H268 | -6.072310445  | 3.838506833  | -3.893518141 |
| H269 | 4.862177125   | 9.852131050  | -2.390504941 |
| H270 | -0.331926455  | 7.430213786  | -7.318913321 |
| H271 | -2.712123692  | 9.071513606  | -5.384139110 |
| H272 | -4.816572134  | -3.155756212 | -4.015779245 |
| H273 | -5.722383579  | -2.636948251 | -1.506325782 |
| H274 | -5.786830400  | 10.908034227 | -0.263834184 |
| H275 | -5.015880566  | 1.927394154  | -2.426567728 |
| H276 | 1.292071311   | 7.467279408  | -4.131635582 |
| H277 | 0.419729713   | 5.835060370  | -6.402001472 |
| H278 | 0.894159551   | 3.673773804  | -4.909767972 |

|      |              |               |              |
|------|--------------|---------------|--------------|
| H279 | -1.960568306 | 5.814882074   | -4.540813148 |
| H280 | 1.595762516  | 9.505733812   | 2.468665737  |
| H281 | 0.753329193  | 10.290985377  | -0.676626939 |
| H282 | 1.183161917  | 13.165922467  | -0.340720525 |
| H283 | 3.139969061  | 9.789336810   | 1.639285990  |
| H284 | -1.350930531 | 11.121650322  | 0.614482805  |
| H285 | 5.783133522  | -3.660144628  | -8.234231430 |
| H286 | 5.537415830  | -5.118119232  | -7.256017632 |
| H287 | 7.999936744  | -5.969514887  | -3.138370475 |
| H288 | 6.216662613  | -5.753193234  | -9.458256700 |
| H289 | 4.624390968  | -6.126185426  | -9.351925576 |
| H290 | 6.253354010  | 4.487417974   | 0.202017699  |
| H291 | 6.441467462  | 7.352381012   | 1.385895631  |
| H292 | 6.377793541  | 7.399889396   | -2.890355539 |
| H293 | 4.864670448  | 5.521315059   | 0.664488585  |
| H294 | 7.771182828  | 7.709524694   | 0.501875657  |
| H295 | 6.288212431  | 2.471494422   | -5.615274884 |
| H296 | 7.165139046  | 6.238808985   | -1.229113920 |
| H297 | 3.696910663  | -6.808940050  | 6.045454029  |
| H298 | 5.693400240  | -8.199472844  | 4.178502055  |
| H299 | 4.728696696  | 0.826575737   | -6.260438657 |
| H300 | 4.142095618  | -0.092309044  | 3.584182894  |
| H301 | 2.065073448  | 1.127128025   | -8.521195318 |
| H302 | -0.434826038 | -2.340435643  | -4.432591268 |
| H303 | 1.561584540  | 1.711435484   | -6.936798654 |
| H304 | 3.115939270  | -4.317442631  | 5.153618481  |
| H305 | 3.081827610  | -0.321752810  | -6.083274143 |
| H306 | 3.093574263  | -4.960373149  | 3.507776599  |
| H307 | 3.455165073  | -7.218264342  | 4.332450823  |
| H308 | 5.474239902  | -5.715684289  | 3.778026211  |
| H309 | 5.455929948  | -5.160909093  | 5.460209265  |
| H310 | -4.057637671 | -0.806413839  | -7.119464998 |
| H311 | 4.051238313  | -9.340734438  | 6.413982329  |
| H312 | 3.035979105  | -11.804952480 | 4.854176380  |
| H313 | 0.982376033  | -0.334981973  | -4.055869168 |
| H314 | 4.066385793  | -11.591964088 | 7.572468083  |
| H315 | 2.528616275  | -11.807840146 | 7.053944768  |
| H316 | 4.813787011  | -3.397528162  | 2.867206544  |
| H317 | 0.282651950  | 1.856214626   | -4.936201779 |
| H318 | -2.483410241 | -2.168375133  | -5.848188709 |
| H319 | 6.738715540  | -10.585676307 | 0.370080084  |
| H320 | 6.457916592  | -8.490194268  | -2.334233078 |
| H321 | 5.618518902  | -8.699496953  | 1.444248800  |
| H322 | 6.096181527  | -11.268726643 | -0.855191425 |
| H323 | 6.612010073  | 1.727321508   | -8.528671753 |
| H324 | 5.907421174  | -5.578406418  | 0.971238068  |
| H325 | 1.558104307  | -7.430140181  | 1.680572780  |
| H326 | 4.332949459  | -2.525929577  | -6.890877396 |
| H327 | 2.152784131  | -9.267009830  | 0.064907238  |
| H328 | 3.702529581  | -7.374615360  | -6.200991021 |
| H329 | 2.671380770  | -5.755875645  | -4.538696674 |
| H330 | 4.540689545  | -12.495360908 | 5.472670943  |
| H331 | 4.619468272  | -1.213681240  | 2.343465610  |
| H332 | 7.571524681  | -6.486076621  | 2.442149572  |
| H333 | 6.877434072  | -4.380920574  | 1.179795267  |
| H334 | 7.671458379  | -7.384855778  | 4.648261131  |
| H335 | 3.503464197  | -2.482532884  | 6.067079170  |
| H336 | 2.154624282  | -11.988385248 | -2.647406790 |
| H337 | 3.156737985  | -8.587953603  | -2.749482527 |
| H338 | 4.270147227  | -8.865010184  | -1.395591556 |
| H339 | 1.200503899  | -8.659410988  | -1.321407690 |

|       |              |               |              |
|-------|--------------|---------------|--------------|
| H340  | 2.214830223  | -2.452920888  | -5.718634792 |
| H341  | -1.776131434 | 2.051280215   | -6.364814770 |
| H342  | -3.855489157 | 0.959037538   | -7.278182410 |
| H343  | 1.543894652  | -5.744692219  | 1.071903157  |
| H344  | 7.490212001  | -8.037508647  | 2.426279099  |
| H345  | 6.054975942  | -9.777947292  | 2.470830715  |
| H346  | 3.094565385  | -0.889317799  | 5.560241803  |
| H347  | 5.906568927  | -8.370186637  | -5.333110550 |
| H348  | 6.245952414  | -6.903058080  | -1.590382938 |
| H349  | 1.464789224  | -3.273672659  | -7.123439702 |
| H350  | 5.515486607  | 3.638762044   | -6.716922398 |
| H351  | 6.318651123  | -0.450267958  | 5.487504835  |
| H352  | 6.881856152  | -0.119930995  | 3.829090570  |
| H353  | 9.332168620  | -7.435170336  | -4.374574597 |
| H354  | 8.525963102  | -8.768823316  | -3.874489281 |
| H355  | 9.554135571  | -9.609388827  | 0.508439693  |
| H356  | 8.042993779  | -9.023645442  | -1.092915547 |
| H357  | 11.357792805 | -8.814315057  | -1.386030763 |
| H358  | 9.577115875  | -7.889590642  | 0.958455712  |
| H359  | 9.439226595  | -0.868693883  | 4.510334908  |
| H360  | -2.019885089 | 13.577018834  | 2.594346275  |
| H361  | 8.409498514  | -7.393862317  | 7.564469629  |
| H362  | 8.256494059  | -4.955728223  | 6.322041620  |
| H363  | -3.614469831 | 12.806509016  | 0.123132409  |
| H364  | -3.141711615 | 10.753643210  | 2.370066241  |
| H365  | -4.703519843 | 11.470590058  | 1.932312637  |
| H366  | -5.105315239 | 7.478058441   | -3.160706684 |
| H367  | 2.348464230  | -1.149922422  | 0.198654604  |
| H368  | -1.089835197 | 0.129555338   | -0.946171282 |
| Mo369 | 3.732659690  | -4.723476105  | -1.565839927 |
| N370  | -7.235033287 | -6.407547999  | -1.495965551 |
| N371  | -9.329630336 | -3.664027412  | -0.058247359 |
| N372  | -9.634892203 | -3.870554940  | 2.751711679  |
| N373  | -7.288964588 | -5.190552473  | 3.558208481  |
| N374  | -5.281940141 | -3.283576289  | 2.798047493  |
| N375  | -6.008469566 | -1.147286852  | 4.531430774  |
| N376  | -5.970990769 | -2.317144415  | 7.188681203  |
| N377  | -3.623909102 | -3.967091618  | 7.483224270  |
| N378  | -1.448186414 | -2.607788105  | 6.412930798  |
| N379  | -1.504818405 | 0.379332474   | 6.561252914  |
| N380  | -2.683474107 | 0.655698206   | 9.214999208  |
| N381  | 3.390550467  | -11.294317772 | 6.866040209  |
| N382  | 4.579208980  | -9.291008700  | 5.535919385  |
| N383  | 4.340808252  | -3.306685956  | 3.770479892  |
| N384  | 3.363201045  | -1.833466395  | 5.299282943  |
| N385  | 4.148483858  | -1.053937790  | 3.251475438  |
| N386  | 7.542298296  | -7.415012669  | 5.683288462  |
| N387  | -5.508716415 | -2.478563543  | -3.645670590 |
| N388  | -1.735678722 | -5.331156679  | -3.106667593 |
| N389  | -5.633910280 | 0.101152128   | -3.175199220 |
| N390  | -8.032973980 | 1.200480418   | -2.363507495 |
| N391  | -7.833184574 | 1.181246410   | 0.396401561  |
| N392  | -5.562942266 | 2.698352950   | 1.156328666  |
| N393  | -2.407517336 | 2.902195367   | -1.721869416 |
| N394  | -1.698840029 | 0.992549063   | -0.984706715 |
| N395  | -6.126094139 | 5.398891284   | 1.425569911  |
| N396  | -8.811767696 | 8.565343781   | -0.845661136 |
| N397  | -8.859212445 | 10.425656854  | 0.362718112  |
| N398  | 8.822200878  | 1.646392668   | 4.509054441  |
| N399  | 7.126422500  | 6.949613066   | 0.738052391  |
| N400  | 5.699023104  | 7.931828259   | -2.352066320 |

|      |              |               |               |
|------|--------------|---------------|---------------|
| N401 | 3.157473512  | 7.256113447   | -3.273218492  |
| N402 | -1.287754140 | 6.207401563   | -5.224062608  |
| N403 | -0.750379501 | 8.018695163   | -6.606846908  |
| N404 | -2.301521155 | 8.274835959   | -4.904453814  |
| N405 | 1.615006465  | 6.316620835   | -1.055065771  |
| N406 | 1.802673646  | 8.567486879   | 0.606820256   |
| N407 | 0.832706331  | 11.137023996  | -0.110629027  |
| N408 | -0.081750737 | 10.181954240  | -3.082429321  |
| N409 | -1.683333550 | 12.078237193  | 0.525843475   |
| N410 | 5.282069052  | -5.342614009  | -9.401247117  |
| N411 | 3.525113298  | -3.049416869  | -7.240923011  |
| N412 | 2.549660460  | -0.150277754  | -6.959624588  |
| N413 | 4.706095909  | 1.715799027   | -6.772019633  |
| N414 | -0.193035734 | -3.366055644  | -10.071903702 |
| N415 | -1.867329092 | -1.356316703  | -8.847424560  |
| N416 | 8.405817810  | -7.776765656  | -4.103092372  |
| N417 | 4.389833572  | -6.213512600  | -3.322007043  |
| N418 | 4.128624780  | -7.134356140  | -5.310006635  |
| N419 | 8.813451135  | -8.365540988  | -0.975684606  |
| N420 | 0.592417439  | 1.774460499   | 0.865355737   |
| N421 | 1.263615808  | 1.144603168   | 0.205948600   |
| O422 | -7.241862522 | -4.364639733  | 0.522468897   |
| O423 | -8.438652989 | -1.943616581  | 2.973261732   |
| O424 | -7.589621325 | -4.356710473  | 5.665218765   |
| O425 | -4.087321787 | -4.054117699  | 4.573445013   |
| O426 | -3.824400159 | -0.501995058  | 4.506047162   |
| O427 | -5.168411317 | -0.288616430  | 7.870126446   |
| O428 | -3.747130562 | -3.610830656  | 9.746108057   |
| O429 | 0.020940015  | -4.197642294  | 7.188723865   |
| O430 | 0.671209656  | -0.043469729  | 7.117425027   |
| O431 | -0.949099574 | 2.070147304   | 9.592905244   |
| O432 | -1.530982567 | 0.238971600   | 12.591136370  |
| O433 | 5.299903708  | -10.662089104 | 3.816826725   |
| O434 | 6.088591595  | -7.794103175  | 7.423651982   |
| O435 | 10.223320757 | -5.287370868  | 6.749427502   |
| O436 | -5.457544611 | -0.096769591  | -0.897006679  |
| O437 | -3.357690951 | -4.244594352  | -4.276130459  |
| O438 | -7.235271095 | 3.331064598   | -2.596775025  |
| O439 | -5.303813071 | 3.586022241   | -4.469702868  |
| O440 | -9.860845905 | 2.246788312   | 0.602134983   |
| O441 | -6.178405561 | 2.549072377   | 3.350163540   |
| O442 | -4.285280113 | 5.660271514   | 2.752141565   |
| O443 | -6.801842494 | 8.075544241   | 3.646535618   |
| O444 | 9.046302322  | -1.272739188  | 6.472466959   |
| O445 | 3.271083142  | 4.838641581   | 4.461224984   |
| O446 | 4.678107022  | 8.222947164   | -0.335596359  |
| O447 | 2.664592381  | 9.466799720   | -3.672719751  |
| O448 | -0.231847104 | 6.995111966   | -2.229107039  |
| O449 | -0.096004955 | 7.911393690   | 1.710987783   |
| O450 | 2.683409150  | 5.788447897   | 1.766521742   |
| O451 | 1.804380462  | 12.067775138  | 1.738699994   |
| O452 | -1.235355204 | 14.143104160  | -0.331118575  |
| O453 | -1.766249208 | 11.711505399  | -2.873496322  |
| O454 | -3.942950152 | 14.205900808  | 2.308341471   |
| O455 | -4.243826063 | 7.361107030   | -2.715610074  |
| O456 | 2.807258817  | -5.015233731  | -8.190042033  |
| O457 | 1.104545467  | -1.128181163  | -8.445164889  |
| O458 | 3.483591260  | 3.249515740   | -7.944951054  |
| O459 | 8.046943406  | 2.836851275   | -7.590746015  |
| O460 | -3.598094038 | -2.687686517  | -9.511504934  |
| O461 | -0.892958962 | -6.677332932  | -5.805134394  |

|  |                           |              |               |              |
|--|---------------------------|--------------|---------------|--------------|
|  | O462                      | 1.159998008  | -6.015964316  | -6.373802308 |
|  | O463                      | -2.305793712 | 2.186017533   | -8.946047996 |
|  | O464                      | 9.879372776  | -6.449091354  | -1.547373208 |
|  | O465                      | 12.111339417 | -8.281352274  | 0.433960915  |
|  | O466                      | -0.683900036 | -6.053633297  | -0.265595873 |
|  | O467                      | -0.688335302 | -8.104539896  | 0.598546299  |
|  | O468                      | 4.174024773  | -11.356730325 | -1.782393096 |
|  | O469                      | 2.072287217  | -11.016904931 | -2.537302670 |
|  | O470                      | 4.649060103  | -6.264304081  | -0.206025695 |
|  | O471                      | 4.102105142  | -7.891230707  | 1.256404494  |
|  | O472                      | 2.299601327  | -6.241313265  | -1.367754151 |
|  | O473                      | 7.962486546  | -7.286294913  | 2.873467916  |
|  | O474                      | 6.531601198  | -5.177172738  | 1.627357996  |
|  | O475                      | -3.223732572 | 5.052317573   | -3.454394169 |
|  | O476                      | 6.947788603  | -11.202387407 | -0.376350120 |
|  | O477                      | 6.397697662  | -9.276168735  | 1.686092873  |
|  | S478                      | 4.587624908  | 4.657805767   | -1.581705900 |
|  | S479                      | 2.562864874  | 1.677002144   | -2.634158795 |
|  | S480                      | 2.257925272  | -3.555321014  | -2.979954657 |
|  | S481                      | 4.020715954  | 1.328050498   | 0.616355887  |
|  | S482                      | 0.628326807  | -1.115978758  | -1.584988239 |
|  | S483                      | 4.705062255  | -1.115362666  | -4.729355971 |
|  | S484                      | 3.251975250  | -3.642658309  | 0.505401456  |
|  | S485                      | 6.212476662  | 1.195615452   | -2.178853216 |
|  | S486                      | 5.843851160  | -3.753284265  | -2.139722325 |
|  | S487                      | 6.384765581  | -1.494205500  | 0.755962907  |
|  | <b>9<sup>-1</sup>(b)</b>  |              |               |              |
|  | Fe1                       | 2.93         |               |              |
|  | Fe2                       | -1.44        |               |              |
|  | Fe3                       | 2.50         |               |              |
|  | Fe4                       | -2.75        |               |              |
|  | Fe5                       | 2.47         |               |              |
|  | Fe6                       | -0.05        |               |              |
|  | Fe7                       | -2.10        |               |              |
|  | S=1                       |              |               |              |
|  | bm2cnx2b262n2x47d2b.car_5 |              |               |              |
|  | C1                        | -8.167254711 | -4.511469306  | -1.174280304 |
|  | C2                        | -8.242652732 | -5.613755987  | -2.237765445 |
|  | C3                        | -9.278904664 | -2.543182110  | -0.207045314 |
|  | C4                        | -9.211272074 | -2.903908384  | 1.275756300  |
|  | C5                        | -9.766589902 | -4.498754068  | 3.036785800  |
|  | C6                        | -8.363972155 | -4.883590090  | 3.520452524  |
|  | C7                        | -6.145922681 | -5.709802243  | 2.890501472  |
|  | C8                        | -5.287010335 | -4.449851190  | 3.042905242  |
|  | C9                        | -4.756760433 | -2.212891738  | 2.234142184  |
|  | C10                       | -5.091014933 | -1.421163478  | 3.507010827  |
|  | C11                       | -6.773122128 | -0.736441627  | 5.121548354  |
|  | C12                       | -6.341509288 | -1.432788808  | 6.419875184  |
|  | C13                       | -6.366926218 | -3.498913635  | 7.733338019  |
|  | C14                       | -4.959771129 | -4.049395482  | 7.993735189  |
|  | C15                       | -2.931028395 | -5.039150898  | 7.016941617  |
|  | C16                       | -1.714491813 | -4.186156060  | 6.649931850  |
|  | C17                       | -0.953463728 | -2.063590811  | 5.616556704  |
|  | C18                       | -0.937682303 | -0.758142338  | 6.432615823  |
|  | C19                       | -1.052945035 | -1.843024322  | 4.083330791  |
|  | C20                       | -0.072397917 | -0.773359380  | 3.592974620  |
|  | C21                       | -0.833465190 | -3.163831091  | 3.335054888  |
|  | C22                       | -2.189817472 | 1.229280160   | 7.186971680  |
|  | C23                       | -2.484894066 | 0.950833027   | 8.674012767  |
|  | C24                       | -3.216799753 | 2.193973493   | 6.547902267  |
|  | C25                       | -3.417940349 | 3.442723925   | 7.416469230  |
|  | C26                       | -2.781494107 | 2.592729585   | 5.132179263  |
|  | C27                       | -3.869210870 | -0.152879775  | 10.335168172 |
|  | C28                       | -2.684014243 | -0.590653131  | 11.171467905 |
|  | C29                       | 3.492512334  | -11.885653127 | 5.178263149  |
|  | C30                       | 4.327411201  | -10.708106027 | 4.675641191  |
|  | C31                       | 4.840025273  | -8.306004463  | 5.131561116  |
|  | C32                       | 5.835570411  | -8.054077690  | 6.279372507  |
|  | C33                       | 3.810701256  | -7.168540326  | 5.012393229  |



|     |              |              |              |
|-----|--------------|--------------|--------------|
| C34 | 4.445438446  | -5.804325365 | 4.733098533  |
| C35 | 3.389824176  | -4.771773035 | 4.342619081  |
| C36 | 3.583744401  | -2.276806063 | 4.327119171  |
| C37 | 8.144169526  | -7.470585289 | 6.851311789  |
| C38 | 8.535474936  | -6.011860914 | 6.961735819  |
| C39 | -4.887851149 | -1.984989737 | -2.844831871 |
| C40 | -5.216189141 | -0.514319323 | -2.544263776 |
| C41 | -3.411869634 | -2.232274539 | -2.455266211 |
| C42 | -2.978954073 | -3.711731920 | -2.379376523 |
| C43 | -2.434541208 | -4.296077972 | -3.680840967 |
| C44 | -5.438068404 | 1.703280373  | -3.574522681 |
| C45 | -6.831647651 | 2.220728740  | -3.193008736 |
| C46 | -4.933204753 | 2.391162899  | -4.858173838 |
| C47 | -9.048346350 | 1.634322098  | -2.328873554 |
| C48 | -8.966009925 | 1.661098404  | -0.794916879 |
| C49 | -7.631863924 | 1.127882846  | 1.202670468  |
| C50 | -6.545037794 | 2.066405138  | 1.730063002  |
| C51 | -4.600720305 | 3.491009203  | 1.267108465  |
| C52 | -5.152958554 | 4.827595283  | 1.818972407  |
| C53 | -3.663079699 | 3.877528384  | 0.111095735  |
| C54 | -2.856572756 | 2.785636480  | -0.516685734 |
| C55 | -2.381063149 | 1.573909678  | -0.076781067 |
| C56 | -1.537738992 | 1.919569991  | -2.095648248 |
| C57 | -6.801962822 | 6.622657918  | 1.406457656  |
| C58 | -7.227735189 | 6.757816691  | 2.867628013  |
| C59 | -8.010713058 | 6.805197228  | 0.458395454  |
| C60 | -8.425550064 | 8.219378206  | 0.172581437  |
| C61 | -8.516451433 | 9.321015137  | 1.001286639  |
| C62 | -9.114082166 | 9.856820101  | -1.064295683 |
| C63 | 7.637730290  | 0.408440758  | 6.122853937  |
| C64 | 8.451275595  | -0.871173250 | 6.180773893  |
| C65 | 6.297743115  | 0.063631280  | 5.424048420  |
| C66 | 5.362385559  | 1.245626009  | 5.332638532  |
| C67 | 4.447830038  | 1.538457508  | 6.362119665  |
| C68 | 5.382617522  | 2.093269286  | 4.211466406  |
| C69 | 3.581749482  | 2.633431776  | 6.276102367  |
| C70 | 4.531336416  | 3.194770836  | 4.115930814  |
| C71 | 3.624651209  | 3.458865307  | 5.145812048  |
| C72 | 6.357366155  | 6.554696809  | 0.484095782  |
| C73 | 5.499673134  | 7.686114771  | -0.096470832 |
| C74 | 5.508543280  | 5.289716514  | 0.686014802  |
| C75 | 5.070605991  | 9.139192842  | -2.031727674 |
| C76 | 3.668307315  | 8.764803533  | -2.515310174 |
| C77 | 2.055548696  | 6.937438182  | -2.926449048 |
| C78 | 1.110474532  | 6.822786061  | -1.709001116 |
| C79 | 2.222196386  | 5.610228544  | -3.688440576 |
| C80 | 0.950574297  | 4.931293701  | -4.208068426 |
| C81 | 0.213498194  | 5.619503673  | -5.368883248 |
| C82 | -1.014341852 | 7.791216342  | -5.249321349 |
| C83 | 0.813864558  | 6.287902626  | 0.651146467  |
| C84 | 0.662618272  | 7.620688746  | 1.410219038  |
| C85 | 1.306769463  | 5.225297183  | 1.643266420  |
| C86 | 1.827486402  | 9.604879388  | 2.231770696  |
| C87 | 1.366708801  | 11.002559594 | 1.828174471  |
| C88 | 0.375424965  | 12.446438854 | 0.102328990  |
| C89 | -1.019777006 | 12.936610961 | 0.546039900  |
| C90 | 0.516408020  | 12.512327264 | -1.434134239 |
| C91 | -0.442755332 | 11.557902012 | -2.136578723 |
| C92 | -3.218872420 | 12.309462352 | 1.433849270  |
| C93 | -3.308487562 | 13.325250071 | 2.566321569  |
| C94 | -3.971155619 | 11.010987093 | 1.832790551  |

|       |               |               |              |
|-------|---------------|---------------|--------------|
| C95   | -4.042858856  | 10.020905597  | 0.692692896  |
| C96   | -5.045693751  | 10.136112209  | -0.281632769 |
| C97   | -3.077790712  | 9.013424923   | 0.535412021  |
| C98   | -5.075134599  | 9.291711350   | -1.393447080 |
| C99   | -3.077991341  | 8.173472134   | -0.582429968 |
| C100  | -4.077165507  | 8.328525795   | -1.539652550 |
| C101  | 5.922528148   | -4.087452382  | -7.913447080 |
| C102  | 4.449752628   | -3.758589672  | -7.740506893 |
| C103  | 2.841686184   | -2.155755252  | -6.724662072 |
| C104  | 2.575288061   | -0.780143537  | -7.346704567 |
| C105  | 3.038540643   | 1.619462977   | -7.180132091 |
| C106  | 4.199777396   | 2.575333680   | -6.927737683 |
| C107  | 6.388865823   | 3.002516272   | -5.915049753 |
| C108  | 7.576328692   | 2.858187239   | -6.846127503 |
| C109  | -0.557472791  | -3.180503917  | -9.630797007 |
| C110  | -1.538947037  | -2.006731530  | -9.548215720 |
| C111  | -0.482176062  | -3.881616385  | -8.255341875 |
| C112  | 0.164190350   | -5.274697793  | -8.367736820 |
| C113  | 0.501111002   | -5.808600002  | -6.995112335 |
| C114  | -1.915943568  | 0.319440298   | -8.905539513 |
| C115  | -1.214908858  | 1.578792219   | -9.372447559 |
| C116  | -2.613165317  | 0.436406531   | -7.529711414 |
| C117  | -1.625469947  | 0.298165605   | -6.404681252 |
| C118  | -0.841343369  | 1.387806306   | -5.994813682 |
| C119  | -1.381767056  | -0.965653501  | -5.838459621 |
| C120  | 0.195824465   | 1.198446310   | -5.074810933 |
| C121  | -0.352107038  | -1.148825670  | -4.913542130 |
| C122  | 0.457423730   | -0.069176443  | -4.549173882 |
| C123  | 8.243063714   | -6.838705609  | -2.604845399 |
| C124  | 9.115890462   | -7.101285271  | -1.364670180 |
| C125  | 6.769946283   | -7.221150213  | -2.379717082 |
| C126  | 5.815540851   | -6.835454761  | -3.469599127 |
| C127  | 5.769169119   | -7.336079903  | -4.755465884 |
| C128  | 4.036699492   | -5.996998814  | -4.427047182 |
| C129  | 9.764001921   | -8.562105164  | 0.470762872  |
| C130  | 11.240048873  | -8.417583691  | 0.173957900  |
| C131  | -0.031558273  | -6.928598346  | -0.069382042 |
| C132  | 1.344924463   | -6.786604635  | 0.518608295  |
| C133  | 2.484409605   | -7.073281448  | -0.539103918 |
| C134  | 2.318867852   | -8.514937488  | -1.104971201 |
| C135  | 3.503299666   | -8.954176143  | -1.981189597 |
| C136  | 3.510613930   | -10.419960654 | -2.317451055 |
| C137  | 3.828692532   | -7.046426120  | 0.247962205  |
| C138  | 4.084966972   | -1.021397720  | -1.274600737 |
| Fe139 | 4.517229869   | -2.232167969  | -2.794241387 |
| Fe140 | 2.621637322   | 0.371826007   | -0.494247652 |
| Fe141 | 5.305696406   | 0.024972699   | -0.115309493 |
| Fe142 | 4.656542170   | 0.360635350   | -2.598313645 |
| Fe143 | 4.408881585   | 2.464262502   | -0.967351984 |
| Fe144 | 4.974136441   | -2.485899618  | -0.247695285 |
| Fe145 | 2.558567532   | -2.171142664  | -1.028433371 |
| H146  | -6.628295758  | -6.683965093  | -1.596429856 |
| H147  | -6.307738092  | -5.733711247  | -2.884329786 |
| H148  | -9.976283576  | -3.766165304  | -1.814627237 |
| H149  | -8.599260418  | -5.172603169  | -3.181931835 |
| H150  | -9.030891923  | -6.314580505  | -1.912909939 |
| H151  | -8.435874092  | -1.864504587  | -0.398255471 |
| H152  | -10.274487637 | -4.631652454  | 0.948628959  |
| H153  | -10.212602720 | -1.992292338  | -0.384112874 |
| H154  | -10.431158925 | -5.365422507  | 3.150903037  |
| H155  | -7.826684536  | -5.405522229  | 1.610446946  |

|      |               |              |               |
|------|---------------|--------------|---------------|
| H156 | -10.121684823 | -3.700426207 | 3.701071553   |
| H157 | -3.672974842  | -2.389785355 | 2.248923018   |
| H158 | -6.109054441  | -3.626611343 | 1.330922816   |
| H159 | -5.736252874  | -6.336565706 | 2.086594391   |
| H160 | -6.325917642  | 0.265148018  | 5.128052043   |
| H161 | -7.100464914  | -1.896878934 | 3.337966263   |
| H162 | -6.074996501  | -6.263068097 | 3.834269205   |
| H163 | -4.992844599  | -1.602503529 | 1.350325592   |
| H164 | -7.044852482  | -3.252027577 | 5.723338071   |
| H165 | -7.867051676  | -0.632175947 | 5.125744340   |
| H166 | -1.567318848  | -3.926894204 | 3.630568023   |
| H167 | -0.918547913  | -3.003290065 | 2.249464719   |
| H168 | 0.176204782   | -3.560627771 | 3.527615425   |
| H169 | -2.075183069  | -1.489380071 | 3.872674283   |
| H170 | -7.060220762  | -4.352266516 | 7.746239840   |
| H171 | -2.680230779  | 1.722946566  | 4.467511285   |
| H172 | -4.119211223  | -0.261789271 | 8.218942622   |
| H173 | -3.808555947  | 3.200795686  | 8.415464183   |
| H174 | -0.190266194  | -0.618974764 | 2.511434400   |
| H175 | 0.971261674   | -1.079005064 | 3.755614310   |
| H176 | 7.409868232   | 0.702493231  | 7.165690044   |
| H177 | -3.523127203  | 3.272573822  | 4.687962544   |
| H178 | -4.133879685  | 4.121511538  | 6.930000698   |
| H179 | -1.812512383  | 3.117553989  | 5.161862861   |
| H180 | -2.467843167  | 3.984472120  | 7.548703146   |
| H181 | -4.184356594  | 1.662963099  | 6.483361339   |
| H182 | -1.200699170  | 1.709539902  | 7.186978148   |
| H183 | -2.849020084  | -0.272222524 | 5.797380284   |
| H184 | -0.227945117  | 0.196942489  | 4.088280976   |
| H185 | 1.524671015   | 4.295809068  | 1.090515124   |
| H186 | 0.480874282   | 5.029879754  | 2.345326176   |
| H187 | 2.494799962   | 5.257365552  | 3.209183883   |
| H188 | 2.168900997   | 4.596766866  | 5.741357288   |
| H189 | 4.540919885   | 3.826654247  | 3.226840453   |
| H190 | 6.057909001   | 1.875242408  | 3.380856159   |
| H191 | 4.405314500   | 0.897880131  | 7.247586628   |
| H192 | -2.963112387  | -2.746535444 | 5.930788562   |
| H193 | -2.898850576  | -5.933017658 | 6.375832019   |
| H194 | -2.799611954  | -5.362935821 | 8.057792008   |
| H195 | -4.645074328  | -4.353435451 | 5.960586227   |
| H196 | -6.605985409  | -2.847563480 | 8.583715505   |
| H197 | 2.866741979   | 2.835200538  | 7.078721202   |
| H198 | 0.003123107   | -2.550879668 | 5.846028062   |
| H199 | -4.339696752  | 0.723415714  | 10.810819438  |
| H200 | -4.597880718  | -0.978237575 | 10.345887917  |
| H201 | -1.868122612  | -1.095841156 | 10.605038765  |
| H202 | 9.035909991   | -8.072318775 | 6.620571960   |
| H203 | -1.000203777  | -5.576991396 | -4.393410582  |
| H204 | -0.064912600  | -8.729299629 | 0.622029034   |
| H205 | -0.546488295  | -5.965632518 | -8.843267109  |
| H206 | 1.069498566   | -5.226398169 | -8.989754594  |
| H207 | -1.491850757  | -3.994070665 | -7.830369709  |
| H208 | -0.408260889  | 1.405887675  | -10.122414143 |
| H209 | -1.042407959  | -3.877183613 | -10.331509500 |
| H210 | -2.766239394  | -1.688186323 | -3.162913882  |
| H211 | -3.832837746  | -4.340380832 | -2.071076674  |
| H212 | -0.073938041  | -0.772264763 | -8.742271914  |
| H213 | -2.717847102  | 0.173122810  | -9.657955628  |
| H214 | 1.291619049   | -2.236425194 | -9.579898157  |
| H215 | -0.977035003  | -5.353463428 | -2.645659110  |
| H216 | 0.080861331   | -3.242694067 | -7.557801584  |

|      |              |              |               |
|------|--------------|--------------|---------------|
| H217 | 1.256542476  | -3.607592764 | -10.492015913 |
| H218 | -6.063438828 | -2.712603918 | -4.381158731  |
| H219 | -3.252510355 | -1.780703408 | -1.465138449  |
| H220 | 2.349825380  | -5.197529721 | -7.282996902  |
| H221 | -2.223290110 | -3.822414087 | -1.589548191  |
| H222 | -4.037379603 | 3.028212589  | 2.090771471   |
| H223 | -2.537949677 | 1.048922624  | 0.858150895   |
| H224 | -8.570321512 | 1.439345041  | 1.679335655   |
| H225 | -7.122393276 | 0.697464380  | -0.826263225  |
| H226 | -6.727986454 | 4.671069991  | 0.520006075   |
| H227 | -8.295485636 | 9.464573567  | 2.052926466   |
| H228 | -7.608459659 | 5.809591242  | 3.318772882   |
| H229 | -8.860813955 | 6.210930169  | 0.838297179   |
| H230 | -6.034750306 | 7.384010331  | 1.195607293   |
| H231 | -9.454003929 | 10.469113663 | -1.896753395  |
| H232 | -2.970177502 | 4.635139941  | 0.512533093   |
| H233 | -4.257111994 | 4.381407182  | -0.668237711  |
| H234 | -9.121591942 | 11.309405071 | 0.492151215   |
| H235 | -7.734526804 | 6.361026389  | -0.510616412  |
| H236 | -5.591020872 | 2.159995736  | -0.099828389  |
| H237 | -7.414764532 | 0.110750077  | 1.560644646   |
| H238 | -9.381983764 | 2.629734307  | -2.647461955  |
| H239 | -0.980022641 | 1.773665909  | -3.016327990  |
| H240 | -9.820306456 | 0.911404785  | -2.623877350  |
| H241 | 9.144600082  | 1.784793930  | 5.930680783   |
| H242 | 7.768606136  | 2.207798008  | 5.155363974   |
| H243 | 2.590979987  | 5.942283962  | -0.535414263  |
| H244 | -0.201387589 | 6.008247900  | 0.333886787   |
| H245 | 2.528133495  | 8.221340102  | 0.798570143   |
| H246 | -2.473478398 | 3.817410717  | -2.379705250  |
| H247 | -3.636203957 | 4.753766065  | -3.971633346  |
| H248 | -3.417820634 | 5.961816499  | -2.966997441  |
| H249 | -3.904282037 | 2.063920186  | -5.060524148  |
| H250 | -5.567622373 | 2.104818449  | -5.714196084  |
| H251 | 1.564140300  | 12.305133923 | -1.697753856  |
| H252 | 0.271650222  | 13.536387167 | -1.744393262  |
| H253 | 1.091572045  | 10.162999737 | -2.523565571  |
| H254 | -0.542913845 | 9.664402258  | -2.895970633  |
| H255 | -0.361174788 | 9.378947255  | -6.363219075  |
| H256 | -0.235799027 | 4.860471366  | -6.026927219  |
| H257 | -5.871829777 | 9.385884581  | -2.135341204  |
| H258 | -2.302160236 | 8.861216118  | 1.291339690   |
| H259 | -2.549199839 | 8.119354008  | -3.911536828  |
| H260 | 2.737852906  | 4.887725954  | -3.035621151  |
| H261 | 4.054811886  | 6.769645376  | -2.190741278  |
| H262 | 0.247017987  | 4.736102248  | -3.383719951  |
| H263 | -7.585687924 | 0.332688987  | -3.210975782  |
| H264 | 5.649509473  | 9.481131631  | -2.900479850  |
| H265 | -5.211111913 | -0.270601869 | -4.529337205  |
| H266 | 2.900576761  | 5.803389592  | -4.535925704  |
| H267 | -2.281173931 | 7.440687818  | -0.724509345  |
| H268 | -5.736400918 | 4.033181697  | -4.180924297  |
| H269 | 4.941725239  | 9.995109162  | -1.354337741  |
| H270 | 0.262201203  | 7.847862290  | -6.863539761  |
| H271 | -2.286577887 | 9.377975979  | -5.062670800  |
| H272 | -4.424637431 | -2.950203335 | -4.603387491  |
| H273 | -5.518168870 | -2.573874517 | -2.152285518  |
| H274 | -5.821393315 | 10.897204735 | -0.173937245  |
| H275 | -4.798407483 | 2.042541641  | -2.741901156  |
| H276 | 1.589148747  | 7.691993301  | -3.574170630  |
| H277 | 0.931265989  | 6.181308868  | -5.979964868  |

|      |              |               |              |
|------|--------------|---------------|--------------|
| H278 | 1.271567553  | 3.947590971   | -4.574139457 |
| H279 | -1.598790318 | 6.078440944   | -4.331212715 |
| H280 | 1.273819435  | 9.346909725   | 3.146396481  |
| H281 | 0.714787121  | 10.315633731  | 0.005576000  |
| H282 | 1.077422256  | 13.171539771  | 0.538835939  |
| H283 | 2.891208275  | 9.688340540   | 2.493932456  |
| H284 | -1.496490718 | 11.054033621  | 1.175678647  |
| H285 | 6.519299839  | -3.164195819  | -7.889586458 |
| H286 | 6.205805283  | -4.676170386  | -7.016350546 |
| H287 | 8.303025720  | -5.754403618  | -2.776548066 |
| H288 | 7.074905267  | -5.202523466  | -9.172563074 |
| H289 | 5.478007215  | -5.561723113  | -9.243133151 |
| H290 | 6.167595470  | 4.478271416   | 1.018963088  |
| H291 | 6.214541269  | 7.290866738   | 2.383223360  |
| H292 | 6.547936835  | 7.603098925   | -1.865166825 |
| H293 | 4.746091574  | 5.483534758   | 1.452968164  |
| H294 | 7.604998022  | 7.715790291   | 1.632928886  |
| H295 | 6.714212746  | 2.822500878   | -4.878828007 |
| H296 | 7.175878460  | 6.323574226   | -0.215729677 |
| H297 | 3.210101399  | -7.133545110  | 5.936353991  |
| H298 | 5.379964579  | -8.403148453  | 4.181752578  |
| H299 | 5.294966525  | 1.183802786   | -5.833149692 |
| H300 | 3.799509706  | -0.281332848  | 3.943194453  |
| H301 | 2.859498385  | 1.600695260   | -8.264095079 |
| H302 | -0.170228340 | -2.128355271  | -4.464681902 |
| H303 | 2.148272253  | 2.085868571   | -6.726491322 |
| H304 | 2.686016505  | -4.596076618  | 5.166270574  |
| H305 | 3.637814824  | 0.037535192   | -5.812741128 |
| H306 | 2.795827727  | -5.146424227  | 3.491611232  |
| H307 | 3.130987788  | -7.437717088  | 4.187306445  |
| H308 | 5.166031407  | -5.888609994  | 3.905456177  |
| H309 | 5.001334791  | -5.442490872  | 5.612515214  |
| H310 | -3.375410913 | -0.354155430  | -7.472751752 |
| H311 | 3.548086100  | -9.665659150  | 6.192869959  |
| H312 | 2.704089538  | -12.042874800 | 4.426493528  |
| H313 | 1.254142139  | -0.211986626  | -3.819309214 |
| H314 | 3.483777382  | -11.982589114 | 7.236159173  |
| H315 | 2.000544024  | -12.170883986 | 6.567660095  |
| H316 | 4.523110144  | -3.523908328  | 3.060943052  |
| H317 | 0.821081252  | 2.035178212   | -4.757440586 |
| H318 | -2.004570525 | -1.815587598  | -6.129420948 |
| H319 | 6.769028145  | -10.566506973 | 0.360696662  |
| H320 | 6.707782991  | -8.316550748  | -2.249713317 |
| H321 | 5.526559162  | -8.749513808  | 1.443734679  |
| H322 | 6.248738403  | -11.184127956 | -0.952396464 |
| H323 | 7.387441801  | 2.252402616   | -7.766896288 |
| H324 | 5.834633002  | -5.603874633  | 1.176456838  |
| H325 | 1.483919580  | -7.450261772  | 1.384634386  |
| H326 | 4.950623712  | -2.123045070  | -6.611153491 |
| H327 | 2.223422698  | -9.209293689  | -0.255103538 |
| H328 | 4.299674194  | -6.988266432  | -6.275645110 |
| H329 | 3.111096235  | -5.469506155  | -4.616872143 |
| H330 | 4.147840602  | -12.772408795 | 5.136722859  |
| H331 | 4.351821961  | -1.320786260  | 2.666531232  |
| H332 | 7.392545742  | -6.597464442  | 2.712808308  |
| H333 | 6.766365442  | -4.413104554  | 1.524419427  |
| H334 | 7.310244958  | -7.620660243  | 4.871873589  |
| H335 | 2.985153531  | -2.821446101  | 6.219153154  |
| H336 | 2.488555835  | -11.783441755 | -3.137178846 |
| H337 | 3.486194529  | -8.381991355  | -2.920432970 |
| H338 | 4.457042714  | -8.752507279  | -1.482063366 |

|       |              |               |              |
|-------|--------------|---------------|--------------|
| H339  | 1.392126439  | -8.556359829  | -1.694308938 |
| H340  | 2.733879159  | -2.114724847  | -5.629537712 |
| H341  | -1.027683163 | 2.375498761   | -6.425600390 |
| H342  | -3.126387232 | 1.410302305   | -7.508285849 |
| H343  | 1.474931438  | -5.742932134  | 0.835374342  |
| H344  | 7.312761931  | -8.146934227  | 2.604928881  |
| H345  | 5.881622822  | -9.890658255  | 2.439239949  |
| H346  | 2.571432118  | -1.208186277  | 5.771586757  |
| H347  | 6.422881686  | -8.025654662  | -5.276878804 |
| H348  | 6.425638749  | -6.771652510  | -1.439852926 |
| H349  | 2.117597100  | -2.860187795  | -7.137941051 |
| H350  | 6.039077941  | 4.045176301   | -5.982363768 |
| H351  | 5.825429234  | -0.747651185  | 5.998185587  |
| H352  | 6.517956025  | -0.318667166  | 4.414585867  |
| H353  | 9.754542566  | -7.151760089  | -3.954866990 |
| H354  | 8.913009882  | -8.510241686  | -3.606742638 |
| H355  | 9.591659599  | -9.615278532  | 0.746483926  |
| H356  | 8.193294957  | -8.927773816  | -0.920496147 |
| H357  | 11.525074577 | -8.595140388  | -0.891013820 |
| H358  | 9.493339522  | -7.941793765  | 1.340476926  |
| H359  | 9.047903796  | -1.079010022  | 5.258646888  |
| H360  | -2.410591290 | 13.380488899  | 3.226099469  |
| H361  | 7.765734384  | -7.781787302  | 7.840501509  |
| H362  | 7.725274954  | -5.284462728  | 6.711363264  |
| H363  | -3.713460931 | 12.755620295  | 0.555521443  |
| H364  | -3.478291724 | 10.559714384  | 2.708250621  |
| H365  | -4.983725479 | 11.307784610  | 2.142957527  |
| H366  | -4.850885944 | 7.643596987   | -3.192921784 |
| H367  | 2.347271158  | -1.117602850  | 0.263349545  |
| H368  | -0.907357332 | 0.220811203   | -1.015191401 |
| Mo369 | 3.879387556  | -4.568824815  | -1.525581771 |
| N370  | -7.016397392 | -6.352558247  | -2.483319886 |
| N371  | -9.249708232 | -3.685787329  | -1.107657014 |
| N372  | -9.806675826 | -4.062890342  | 1.650284960  |
| N373  | -7.539483701 | -5.423102889  | 2.587806476  |
| N374  | -5.481476763 | -3.471003966  | 2.121634058  |
| N375  | -6.384597718 | -1.447277829  | 3.913859856  |
| N376  | -6.569066566 | -2.769980632  | 6.490331375  |
| N377  | -4.229720510 | -4.399253562  | 6.896133443  |
| N378  | -1.985738748 | -2.974259109  | 6.100033027  |
| N379  | -2.080143399 | -0.012371283  | 6.418112400  |
| N380  | -3.501630142 | 0.094925332   | 8.951806361  |
| N381  | 2.873740074  | -11.648709388 | 6.487104619  |
| N382  | 4.158779219  | -9.569984326  | 5.373842022  |
| N383  | 3.993425022  | -3.494888927  | 3.936205177  |
| N384  | 2.908772332  | -2.123051677  | 5.487254777  |
| N385  | 3.804415310  | -1.216022438  | 3.540602681  |
| N386  | 7.086931096  | -7.708611187  | 5.886914543  |
| N387  | -5.142323264 | -2.287706150  | -4.257198563 |
| N388  | -1.394127243 | -5.142684761  | -3.554017019 |
| N389  | -5.329360154 | 0.262156370   | -3.651914436 |
| N390  | -7.803126620 | 1.303774845   | -2.998374392 |
| N391  | -7.843432516 | 1.124158259   | -0.234619429 |
| N392  | -5.669836314 | 2.600166054   | 0.816072258  |
| N393  | -2.315749438 | 2.970573222   | -1.784478037 |
| N394  | -1.577273557 | 1.058822806   | -1.074965945 |
| N395  | -6.260922230 | 5.286727775   | 1.182196409  |
| N396  | -8.800386727 | 8.568109574   | -1.115492282 |
| N397  | -8.954340052 | 10.351254120  | 0.195713876  |
| N398  | 8.381186568  | 1.413177516   | 5.359477935  |
| N399  | 6.957889832  | 6.934253181   | 1.773478866  |

|      |              |               |               |
|------|--------------|---------------|---------------|
| N400 | 5.807945461  | 8.085769574   | -1.362724965  |
| N401 | 3.376711156  | 7.447030283   | -2.567892266  |
| N402 | -0.867111692 | 6.509119181   | -4.926611150  |
| N403 | -0.224011516 | 8.393908103   | -6.160631763  |
| N404 | -1.921949457 | 8.552903482   | -4.593223062  |
| N405 | 1.649336124  | 6.380194934   | -0.541225584  |
| N406 | 1.667620963  | 8.532256481   | 1.260891265   |
| N407 | 0.739702051  | 11.130175610  | 0.620685474   |
| N408 | 0.083071738  | 10.353070916  | -2.480392578  |
| N409 | -1.832227965 | 12.011609173  | 1.112674146   |
| N410 | 6.142153034  | -4.784104265  | -9.184803081  |
| N411 | 4.179970473  | -2.628918038  | -7.057940008  |
| N412 | 3.183113700  | 0.249410886   | -6.721401682  |
| N413 | 5.286879169  | 2.120304479   | -6.252796279  |
| N414 | 0.717230456  | -2.777743372  | -10.237143946 |
| N415 | -1.047984623 | -0.833858097  | -9.056823505  |
| N416 | 8.807921335  | -7.507863918  | -3.793017292  |
| N417 | 4.720579606  | -5.990601550  | -3.286168078  |
| N418 | 4.645316523  | -6.793888205  | -5.339926073  |
| N419 | 8.940882238  | -8.272815807  | -0.692661266  |
| N420 | 0.503657909  | 1.779289409   | 1.055844081   |
| N421 | 1.251543632  | 1.221129845   | 0.417292759   |
| O422 | -7.209728457 | -4.395729988  | -0.386968129  |
| O423 | -8.646040033 | -2.150923139  | 2.085633212   |
| O424 | -8.036535954 | -4.727580603  | 4.708337411   |
| O425 | -4.471549780 | -4.327313316  | 3.970473641   |
| O426 | -4.216870921 | -0.782665236  | 4.114591171   |
| O427 | -5.852324668 | -0.783075699  | 7.359788297   |
| O428 | -4.562609858 | -4.192337388  | 9.158165633   |
| O429 | -0.572997156 | -4.630243390  | 6.839074478   |
| O430 | 0.075077219  | -0.420932430  | 7.064832793   |
| O431 | -1.822414297 | 1.488380167   | 9.577497939   |
| O432 | -2.643982277 | -0.471968241  | 12.387022803  |
| O433 | 5.064538974  | -10.857004117 | 3.677464808   |
| O434 | 5.480930666  | -8.170682307  | 7.465794721   |
| O435 | 9.642345378  | -5.637976312  | 7.314510651   |
| O436 | -5.363731252 | -0.073576802  | -1.383314750  |
| O437 | -2.937291809 | -4.020179963  | -4.793439297  |
| O438 | -7.002133745 | 3.446227118   | -3.021970873  |
| O439 | -4.920351146 | 3.818820920   | -4.704765289  |
| O440 | -9.903975290 | 2.142345021   | -0.148140440  |
| O441 | -6.489908135 | 2.342361530   | 2.930628980   |
| O442 | -4.548955018 | 5.465393562   | 2.685824821   |
| O443 | -7.201414540 | 7.800199352   | 3.499183312   |
| O444 | 8.457113628  | -1.639818264  | 7.132024726   |
| O445 | 2.784624185  | 4.543580291   | 4.987236553   |
| O446 | 4.585080935  | 8.224468905   | 0.553594307   |
| O447 | 2.884453283  | 9.674308955   | -2.856252425  |
| O448 | -0.085267382 | 7.144343189   | -1.827726762  |
| O449 | -0.317392582 | 7.802431854   | 2.146662655   |
| O450 | 2.462323622  | 5.701119044   | 2.336900176   |
| O451 | 1.544631485  | 11.954769103  | 2.598784644   |
| O452 | -1.350458361 | 14.120966712  | 0.392497778   |
| O453 | -1.638772759 | 11.844769275  | -2.304262207  |
| O454 | -4.301697491 | 14.003803485  | 2.772515154   |
| O455 | -4.035189693 | 7.499529977   | -2.675241787  |
| O456 | 3.566606619  | -4.531980393  | -8.190538270  |
| O457 | 1.868195035  | -0.645044018  | -8.368268936  |
| O458 | 4.096260580  | 3.741715694   | -7.342715524  |
| O459 | 8.664185819  | 3.365203287   | -6.626626291  |
| O460 | -2.728747879 | -2.136780597  | -9.884040214  |

|  |                          |              |               |              |
|--|--------------------------|--------------|---------------|--------------|
|  | O461                     | -0.324506910 | -6.316226534  | -6.242748969 |
|  | O462                     | 1.778382233  | -5.655696454  | -6.589974467 |
|  | O463                     | -1.519778431 | 2.709912204   | -9.021397854 |
|  | O464                     | 10.019657656 | -6.310451798  | -1.033521354 |
|  | O465                     | 12.083443928 | -8.205821164  | 1.033287064  |
|  | O466                     | -0.630182503 | -6.066623267  | -0.695341410 |
|  | O467                     | -0.646497917 | -8.143056380  | 0.101186993  |
|  | O468                     | 4.423445515  | -11.203632828 | -2.066795624 |
|  | O469                     | 2.383463860  | -10.824289174 | -2.959319371 |
|  | O470                     | 4.684118710  | -6.157730309  | -0.146256856 |
|  | O471                     | 4.042572818  | -7.874462225  | 1.162029898  |
|  | O472                     | 2.456531065  | -6.119335774  | -1.537027731 |
|  | O473                     | 7.748019506  | -7.423291957  | 3.128341162  |
|  | O474                     | 6.410954831  | -5.242622891  | 1.897770727  |
|  | O475                     | -2.946663854 | 5.226854162   | -3.428206807 |
|  | O476                     | 7.053285863  | -11.138410747 | -0.396232304 |
|  | O477                     | 6.281015061  | -9.342612104  | 1.713185338  |
|  | S478                     | 4.617311392  | 4.751582812   | -0.846964691 |
|  | S479                     | 2.886011511  | 1.776066610   | -2.416400475 |
|  | S480                     | 2.547721534  | -3.302377456  | -2.998285687 |
|  | S481                     | 3.978622442  | 1.392686474   | 1.022559607  |
|  | S482                     | 0.702362110  | -1.055224437  | -1.423590169 |
|  | S483                     | 5.231261210  | -0.835075511  | -4.405633124 |
|  | S484                     | 3.169920652  | -3.577775384  | 0.534523114  |
|  | S485                     | 6.342022227  | 1.417157403   | -1.586938470 |
|  | S486                     | 6.047445374  | -3.603803530  | -1.833580892 |
|  | S487                     | 6.217950725  | -1.472676328  | 1.239980173  |
|  | <b>9<sup>-1</sup>u</b>   |              |               |              |
|  | Fe( 139)                 | 0.551        | -2.369        |              |
|  | Fe( 140)                 | 0.352        | -1.031        |              |
|  | Fe( 141)                 | 0.508        | -2.233        |              |
|  | Fe( 142)                 | 0.580        | 2.911         |              |
|  | Fe( 143)                 | 0.560        | 2.879         |              |
|  | Fe( 144)                 | 0.508        | 2.240         |              |
|  | Fe( 145)                 | 0.401        | -0.967        |              |
|  | <b>S=1</b>               |              |               |              |
|  | bm2cnx2622n2x35unh.car_3 |              |               |              |
|  | C1                       | -7.656556218 | -5.367799035  | -0.812050413 |
|  | C2                       | -7.666581480 | -6.457065055  | -1.891590169 |
|  | C3                       | -8.919823738 | -3.535141830  | 0.232477550  |
|  | C4                       | -8.748156882 | -3.895913755  | 1.707023221  |
|  | C5                       | -9.043370006 | -5.558118097  | 3.471365200  |
|  | C6                       | -7.584668352 | -5.797766187  | 3.876473480  |
|  | C7                       | -5.328551597 | -6.382414949  | 3.125748415  |
|  | C8                       | -4.601591759 | -5.040683623  | 3.258633941  |
|  | C9                       | -4.349297174 | -2.750276356  | 2.469139007  |
|  | C10                      | -4.703361639 | -2.020013827  | 3.773712487  |
|  | C11                      | -6.386127970 | -1.523048882  | 5.456829022  |
|  | C12                      | -5.813782221 | -2.174688823  | 6.723428189  |
|  | C13                      | -5.537584425 | -4.247335787  | 7.999623793  |
|  | C14                      | -4.065683488 | -4.634341111  | 8.190445399  |
|  | C15                      | -1.986650142 | -5.376810190  | 7.106469940  |
|  | C16                      | -0.890708123 | -4.394904328  | 6.683443191  |
|  | C17                      | -0.409844895 | -2.209566477  | 5.616334844  |
|  | C18                      | -0.495450568 | -0.917893669  | 6.449564828  |
|  | C19                      | -0.603680436 | -1.982679827  | 4.093008063  |
|  | C20                      | 0.241702582  | -0.816233315  | 3.569627246  |
|  | C21                      | -0.295526496 | -3.265147911  | 3.311955778  |
|  | C22                      | -1.923035406 | 0.911085221   | 7.289059879  |
|  | C23                      | -2.106109493 | 0.589129008   | 8.785513639  |
|  | C24                      | -3.091153859 | 1.750930547   | 6.716148516  |
|  | C25                      | -3.396091681 | 2.958924346   | 7.609666471  |
|  | C26                      | -2.778434814 | 2.211251825   | 5.286081258  |
|  | C27                      | -3.288163176 | -0.661290046  | 10.498607611 |
|  | C28                      | -2.034348278 | -0.986507586  | 11.284324031 |
|  | C29                      | 5.027957654  | -11.461154305 | 4.786710886  |
|  | C30                      | 5.708231284  | -10.195349030 | 4.269758651  |
|  | C31                      | 6.010736513  | -7.767438720  | 4.761161294  |
|  | C32                      | 7.037543874  | -7.415009247  | 5.854616740  |



|     |               |              |              |
|-----|---------------|--------------|--------------|
| C33 | 4.856827668   | -6.748688330 | 4.720819808  |
| C34 | 5.318544541   | -5.320171913 | 4.423362374  |
| C35 | 4.136820768   | -4.412054514 | 4.094429541  |
| C36 | 4.059379788   | -1.908754359 | 4.104959465  |
| C37 | 9.293764717   | -6.557988710 | 6.292478709  |
| C38 | 9.504778861   | -5.063305041 | 6.415654369  |
| C39 | -4.770059778  | -2.487268001 | -2.626199252 |
| C40 | -5.249830085  | -1.065669694 | -2.293717654 |
| C41 | -3.260055840  | -2.559808922 | -2.316384598 |
| C42 | -2.644272661  | -3.972544461 | -2.271551451 |
| C43 | -2.129979206  | -4.510107717 | -3.604004431 |
| C44 | -5.776316180  | 1.117994746  | -3.285262015 |
| C45 | -7.200246472  | 1.470996266  | -2.833294462 |
| C46 | -5.413250623  | 1.870495288  | -4.580362474 |
| C47 | -9.281920767  | 0.636005643  | -1.848340433 |
| C48 | -9.116163718  | 0.688265811  | -0.320983572 |
| C49 | -7.631981302  | 0.266124749  | 1.596976976  |
| C50 | -6.638076786  | 1.325151978  | 2.079975363  |
| C51 | -4.877521394  | 2.941998902  | 1.534021910  |
| C52 | -5.532107694  | 4.231440864  | 2.098294318  |
| C53 | -4.008284421  | 3.388081579  | 0.350187446  |
| C54 | -3.122024796  | 2.368164698  | -0.301775190 |
| C55 | -2.523626520  | 1.195383564  | 0.097439308  |
| C56 | -1.790316347  | 1.634802114  | -1.941905770 |
| C57 | -7.410081341  | 5.823324541  | 1.839251268  |
| C58 | -7.731152057  | 5.899698071  | 3.330328313  |
| C59 | -8.708082461  | 5.874160459  | 1.000620530  |
| C60 | -9.278938476  | 7.241763590  | 0.755180669  |
| C61 | -9.477316070  | 8.306087148  | 1.614607996  |
| C62 | -10.168556534 | 8.822336714  | -0.426528266 |
| C63 | 7.886449350   | 1.191703095  | 5.716169150  |
| C64 | 8.812663223   | -0.011500663 | 5.699857214  |
| C65 | 6.543140301   | 0.717949914  | 5.105184626  |
| C66 | 5.484664897   | 1.796104924  | 5.075514636  |
| C67 | 4.568987298   | 1.958582416  | 6.131796190  |
| C68 | 5.386419657   | 2.673018675  | 3.980133004  |
| C69 | 3.584412577   | 2.952781350  | 6.093157488  |
| C70 | 4.418162118   | 3.676974557  | 3.932824953  |
| C71 | 3.512761948   | 3.810794517  | 4.989071836  |
| C72 | 5.624725774   | 7.227510212  | 0.251788451  |
| C73 | 4.618444842   | 8.261946787  | -0.266473818 |
| C74 | 4.931500355   | 5.872173786  | 0.449902817  |
| C75 | 3.915214166   | 9.656222920  | -2.163195133 |
| C76 | 2.536159501   | 9.133638498  | -2.567838707 |
| C77 | 1.111419108   | 7.146529028  | -2.918127011 |
| C78 | 0.249209355   | 6.909142158  | -1.659387479 |
| C79 | 1.387034604   | 5.858260415  | -3.712949088 |
| C80 | 0.177902447   | 5.041294497  | -4.178989188 |
| C81 | -0.699956200  | 5.650974098  | -5.286776280 |
| C82 | -2.158934654  | 7.659633165  | -5.052846979 |
| C83 | 0.138730493   | 6.327561143  | 0.707451673  |
| C84 | -0.113523088  | 7.628668082  | 1.494850308  |
| C85 | 0.795397428   | 5.311791285  | 1.652055685  |
| C86 | 0.871767540   | 9.729087900  | 2.269026231  |
| C87 | 0.247968437   | 11.074813730 | 1.909459409  |
| C88 | -0.983277094  | 12.416475693 | 0.255976859  |
| C89 | -2.403802906  | 12.755895171 | 0.759753975  |
| C90 | -0.908995940  | 12.500116333 | -1.284873712 |
| C91 | -1.806266329  | 11.461998209 | -1.948861983 |
| C92 | -4.477435244  | 11.887391924 | 1.751821623  |
| C93 | -4.610824919  | 12.897104241 | 2.885356369  |

|       |              |              |              |
|-------|--------------|--------------|--------------|
| C94   | -5.045671890 | 10.512754003 | 2.196767607  |
| C95   | -5.077925742 | 9.519861406  | 1.057694628  |
| C96   | -6.154660794 | 9.510878780  | 0.156506700  |
| C97   | -4.011929670 | 8.633990658  | 0.827438720  |
| C98   | -6.159581457 | 8.668685781  | -0.957097710 |
| C99   | -3.988191629 | 7.800937682  | -0.295071777 |
| C100  | -5.063383461 | 7.833824190  | -1.180705588 |
| C101  | 5.908765698  | -3.356145877 | -8.258069628 |
| C102  | 4.421605747  | -3.178336212 | -8.005874486 |
| C103  | 2.716858142  | -1.757628578 | -6.887244205 |
| C104  | 2.251250194  | -0.418386194 | -7.469018492 |
| C105  | 2.435257921  | 2.020334448  | -7.266642134 |
| C106  | 3.514981580  | 3.085603122  | -7.102288925 |
| C107  | 5.711714106  | 3.732798033  | -6.230321000 |
| C108  | 6.839658123  | 3.726437242  | -7.242720081 |
| C109  | -0.698809935 | -3.147228787 | -9.634152489 |
| C110  | -1.798354244 | -2.085475557 | -9.511983849 |
| C111  | -0.484622139 | -3.832466404 | -8.265996478 |
| C112  | 0.287119225  | -5.155872259 | -8.422050767 |
| C113  | 0.753453286  | -5.665609726 | -7.078177795 |
| C114  | -2.395473106 | 0.178917968  | -8.803650873 |
| C115  | -1.852656685 | 1.503769358  | -9.301510089 |
| C116  | -3.009871165 | 0.216913467  | -7.383485459 |
| C117  | -1.962045136 | 0.178226966  | -6.302164542 |
| C118  | -1.289566306 | 1.343429979  | -5.899610636 |
| C119  | -1.565814941 | -1.053263775 | -5.749172181 |
| C120  | -0.222822418 | 1.266435124  | -4.996918552 |
| C121  | -0.508751928 | -1.125517009 | -4.838092557 |
| C122  | 0.183986488  | 0.034514623  | -4.475957677 |
| C123  | 8.769371644  | -5.849494202 | -3.120312932 |
| C124  | 9.727564386  | -6.017290596 | -1.926938059 |
| C125  | 7.351525569  | -6.351986579 | -2.801102042 |
| C126  | 6.305083023  | -6.095604794 | -3.844623393 |
| C127  | 6.248885386  | -6.613467199 | -5.123304239 |
| C128  | 4.388596313  | -5.487752329 | -4.705178890 |
| C129  | 10.649298733 | -7.422116675 | -0.163770499 |
| C130  | 12.087459990 | -7.112738755 | -0.516360645 |
| C131  | 0.679387287  | -6.902242035 | -0.145181864 |
| C132  | 2.062668420  | -6.577722535 | 0.352251849  |
| C133  | 3.165247101  | -6.728749733 | -0.766826284 |
| C134  | 3.132476004  | -8.173729314 | -1.346240907 |
| C135  | 4.307101810  | -8.473038556 | -2.293079362 |
| C136  | 4.463671998  | -9.931144995 | -2.624634529 |
| C137  | 4.540304018  | -6.557602203 | -0.055359021 |
| C138  | 4.107041847  | -0.525872061 | -1.505666879 |
| Fe139 | 4.555809601  | -1.682181504 | -3.047324609 |
| Fe140 | 2.768239075  | 0.797827782  | -0.677049672 |
| Fe141 | 5.344493418  | 0.615698198  | -0.396166473 |
| Fe142 | 4.468404287  | 0.903585317  | -2.831124337 |
| Fe143 | 4.307627005  | 2.959544713  | -1.091470351 |
| Fe144 | 5.148360670  | -1.901110300 | -0.521240026 |
| Fe145 | 2.612140432  | -1.795791521 | -1.240104993 |
| H146  | -5.916369156 | -7.354405157 | -1.352832323 |
| H147  | -5.764226292 | -6.353057496 | -2.633240754 |
| H148  | -9.555407456 | -4.803565261 | -1.364536072 |
| H149  | -8.122498646 | -6.049414819 | -2.808045714 |
| H150  | -8.353560287 | -7.246309770 | -1.539974509 |
| H151  | -8.156170859 | -2.776134565 | 0.013153416  |
| H152  | -9.640683414 | -5.722078673 | 1.409391980  |
| H153  | -9.909261736 | -3.076722249 | 0.097944585  |
| H154  | -9.603100824 | -6.493560096 | 3.601978527  |

|      |              |              |               |
|------|--------------|--------------|---------------|
| H155 | -7.093152488 | -6.242045654 | 1.933659004   |
| H156 | -9.450489363 | -4.813413216 | 4.167312010   |
| H157 | -3.253942783 | -2.810364548 | 2.426909598   |
| H158 | -5.586328901 | -4.287857311 | 1.602469978   |
| H159 | -4.895808992 | -6.956657406 | 2.295420566   |
| H160 | -6.068026556 | -0.472883202 | 5.458934486   |
| H161 | -6.663999679 | -2.679471098 | 3.663204596   |
| H162 | -5.155533511 | -6.931803801 | 4.058468134   |
| H163 | -4.693201896 | -2.153848409 | 1.611230558   |
| H164 | -6.334853231 | -4.054388516 | 6.029866704   |
| H165 | -7.483184174 | -1.554929569 | 5.510333880   |
| H166 | -0.935449578 | -4.101203589 | 3.629207955   |
| H167 | -0.449688295 | -3.097114348 | 2.235681680   |
| H168 | 0.756540090  | -3.562465047 | 3.451290856   |
| H169 | -1.664870484 | -1.726668402 | 3.938624200   |
| H170 | -6.126811625 | -5.175418015 | 8.025467794   |
| H171 | -2.614370792 | 1.367102903  | 4.601950517   |
| H172 | -3.625517785 | -0.784316277 | 8.398679817   |
| H173 | -3.678391050 | 2.666414849  | 8.631408058   |
| H174 | 0.027026992  | -0.649236440 | 2.504378225   |
| H175 | 1.315672422  | -1.036227226 | 3.644919275   |
| H176 | 7.703040446  | 1.457450771  | 6.775519314   |
| H177 | -3.614719802 | 2.810440526  | 4.896735344   |
| H178 | -4.226004084 | 3.539266232  | 7.181272017   |
| H179 | -1.876850828 | 2.844890881  | 5.275772840   |
| H180 | -2.519103006 | 3.622498823  | 7.678128360   |
| H181 | -3.987230987 | 1.104122966  | 6.689929981   |
| H182 | -0.998496373 | 1.504637987  | 7.245377937   |
| H183 | -2.480114562 | -0.649295721 | 5.919851023   |
| H184 | 0.044968906  | 0.124372454  | 4.105405352   |
| H185 | 1.073467824  | 4.416993707  | 1.069815980   |
| H186 | 0.039334251  | 5.022093210  | 2.397980334   |
| H187 | 2.063041293  | 5.464832729  | 3.148262357   |
| H188 | 1.958195213  | 4.762411486  | 5.654631590   |
| H189 | 4.341892335  | 4.332201915  | 3.064452755   |
| H190 | 6.059817787  | 2.546241080  | 3.129445275   |
| H191 | 4.614676501  | 1.293502677  | 6.999131996   |
| H192 | -2.318861983 | -3.112591080 | 5.993721905   |
| H193 | -1.889466463 | -6.262715782 | 6.460591916   |
| H194 | -1.767908866 | -5.682494803 | 8.137676726   |
| H195 | -3.818311380 | -4.884074653 | 6.143620279   |
| H196 | -5.814841046 | -3.640950800 | 8.871397112   |
| H197 | 2.871738165  | 3.056165019  | 6.915953347   |
| H198 | 0.601797442  | -2.596573171 | 5.796585215   |
| H199 | -3.821690729 | 0.162638525  | 10.999895478  |
| H200 | -3.933805483 | -1.553410744 | 10.534545688  |
| H201 | -1.205252341 | -1.431388978 | 10.685548718  |
| H202 | 10.237241318 | -7.033816758 | 5.985072268   |
| H203 | -0.622849688 | -5.647701342 | -4.401258528  |
| H204 | 0.943670628  | -8.699791449 | 0.508040563   |
| H205 | -0.373523435 | -5.911544207 | -8.870902132  |
| H206 | 1.149795874  | -5.010979731 | -9.089150697  |
| H207 | -1.455102926 | -4.037237927 | -7.788307976  |
| H208 | -1.123089145 | 1.408489587  | -10.140320557 |
| H209 | -1.135726336 | -3.895566880 | -10.313258879 |
| H210 | -2.717955080 | -1.936551817 | -3.044338421  |
| H211 | -3.384985678 | -4.699084565 | -1.890727237  |
| H212 | -0.447103286 | -0.715073943 | -8.732968461  |
| H213 | -3.222043242 | -0.048962484 | -9.508152627  |
| H214 | 1.035928006  | -2.006190444 | -9.663018808  |
| H215 | -0.509220998 | -5.393708508 | -2.661288873  |

|      |               |              |               |
|------|---------------|--------------|---------------|
| H216 | 0.051991806   | -3.138412560 | -7.601672237  |
| H217 | 1.112818011   | -3.376043699 | -10.573517703 |
| H218 | -5.932668995  | -3.342848970 | -4.105920730  |
| H219 | -3.105169817  | -2.099712094 | -1.329996831  |
| H220 | 2.499853907   | -4.828662338 | -7.438449586  |
| H221 | -1.814151636  | -3.964783735 | -1.551599141  |
| H222 | -4.254531645  | 2.547017174  | 2.350376870   |
| H223 | -2.594975962  | 0.653341878  | 1.032728834   |
| H224 | -8.571702524  | 0.446123806  | 2.133831886   |
| H225 | -7.196138292  | -0.100708201 | -0.459292604  |
| H226 | -7.171731207  | 3.893230866  | 0.921152147   |
| H227 | -9.252526497  | 8.450501554  | 2.665564302   |
| H228 | -7.996136435  | 4.916442458  | 3.789289019   |
| H229 | -9.461357470  | 5.209218002  | 1.459168980   |
| H230 | -6.756899001  | 6.671112506  | 1.578967200   |
| H231 | -10.591328308 | 9.411531043  | -1.236434898  |
| H232 | -3.375478584  | 4.211624364  | 0.720874062   |
| H233 | -4.662598382  | 3.829360717  | -0.419914995  |
| H234 | -10.307020008 | 10.226789578 | 1.166314298   |
| H235 | -8.484631188  | 5.451296255  | 0.008832465   |
| H236 | -5.794193990  | 1.523801019  | 0.206208108   |
| H237 | -7.262841926  | -0.718766314 | 1.919693770   |
| H238 | -9.751603953  | 1.579998054  | -2.153110098  |
| H239 | -1.254677592  | 1.558399055  | -2.884954676  |
| H240 | -9.977126733  | -0.179406338 | -2.091523215  |
| H241 | 9.243048983   | 2.701699160  | 5.448024111   |
| H242 | 7.789091051   | 3.003381734  | 4.766768124   |
| H243 | 1.875935468   | 6.194493898  | -0.578189308  |
| H244 | -0.855162551  | 5.943794854  | 0.436310325   |
| H245 | 1.628498175   | 8.441284876  | 0.778230243   |
| H246 | -2.912758029  | 3.438238329  | -2.164758405  |
| H247 | -4.358384366  | 4.346080248  | -3.683986581  |
| H248 | -4.229182033  | 5.559327480  | -2.672811944  |
| H249 | -4.366245232  | 1.661516194  | -4.841056588  |
| H250 | -6.055177119  | 1.527207987  | -5.409347166  |
| H251 | 0.142400501   | 12.382819144 | -1.586777272  |
| H252 | -1.254652999  | 13.498053614 | -1.583396011  |
| H253 | -0.168881586  | 10.222248894 | -2.420968436  |
| H254 | -1.764453354  | 9.566282398  | -2.709682834  |
| H255 | -1.733376228  | 9.335148021  | -6.152355655  |
| H256 | -1.081505329  | 4.850446579  | -5.938055923  |
| H257 | -7.012445854  | 8.661896158  | -1.640422304  |
| H258 | -3.175390093  | 8.574490852  | 1.529787761   |
| H259 | -3.641236190  | 7.793472008  | -3.625591574  |
| H260 | 2.014755448   | 5.193623846  | -3.097776230  |
| H261 | 3.157202336   | 7.189315793  | -2.294403681  |
| H262 | -0.451580349  | 4.748032214  | -3.324062959  |
| H263 | -7.733930202  | -0.491280200 | -2.823262937  |
| H264 | 4.397858109   | 10.058094966 | -3.064381096  |
| H265 | -5.379434926  | -0.814078200 | -4.272958319  |
| H266 | 1.993199229   | 6.140688446  | -4.589484001  |
| H267 | -3.123829357  | 7.164974472  | -0.493368508  |
| H268 | -6.360851764  | 3.405734340  | -3.844754524  |
| H269 | 3.739061646   | 10.493498492 | -1.473298941  |
| H270 | -0.984280080  | 7.889453930  | -6.729658061  |
| H271 | -3.583927045  | 9.091311521  | -4.760879387  |
| H272 | -4.291382898  | -3.382734621 | -4.415564731  |
| H273 | -5.294428209  | -3.146174309 | -1.908280986  |
| H274 | -7.007032314  | 10.173474853 | 0.322647444   |
| H275 | -5.140665016  | 1.520192535  | -2.477684303  |
| H276 | 0.534709126   | 7.854591090  | -3.528082033  |

|      |              |               |              |
|------|--------------|---------------|--------------|
| H277 | -0.088918734 | 6.307206464   | -5.919204754 |
| H278 | 0.594402890  | 4.107416381   | -4.579968470 |
| H279 | -2.501896591 | 5.874855516   | -4.148512030 |
| H280 | 0.403058458  | 9.409398330   | 3.211883128  |
| H281 | -0.447177744 | 10.330321574  | 0.126764497  |
| H282 | -0.341347886 | 13.206284889  | 0.673004839  |
| H283 | 1.934567122  | 9.921148188   | 2.470136255  |
| H284 | -2.645069221 | 10.830639991  | 1.391275123  |
| H285 | 6.415637438  | -2.380342235  | -8.233750505 |
| H286 | 6.289539974  | -3.940099338  | -7.394250879 |
| H287 | 8.726951751  | -4.765688436  | -3.301176116 |
| H288 | 7.107655684  | -4.289939568  | -9.616395841 |
| H289 | 5.567955614  | -4.847007285  | -9.600836277 |
| H290 | 5.686005328  | 5.149555812   | 0.784982949  |
| H291 | 5.485951086  | 7.894967976   | 2.175844714  |
| H292 | 5.552873550  | 8.280947058   | -2.098707409 |
| H293 | 4.152462678  | 5.969289393   | 1.218762771  |
| H294 | 6.784723911  | 8.490543103   | 1.378732300  |
| H295 | 6.130946227  | 3.572694103   | -5.225091342 |
| H296 | 6.432194371  | 7.103889922   | -0.486821543 |
| H297 | 4.317002439  | -6.786220834  | 5.681992130  |
| H298 | 6.501962520  | -7.792764525  | 3.780653292  |
| H299 | 4.818743881  | 1.809593207   | -6.101124097 |
| H300 | 4.065003265  | 0.103943510   | 3.756233887  |
| H301 | 2.156092874  | 1.994732273   | -8.328548711 |
| H302 | -0.214916227 | -2.075875704  | -4.385863306 |
| H303 | 1.551910581  | 2.391103774   | -6.721815806 |
| H304 | 3.451861500  | -4.326028599  | 4.947393527  |
| H305 | 3.282506251  | 0.496750505   | -5.970949520 |
| H306 | 3.553596482  | -4.842164766  | 3.263123595  |
| H307 | 4.160371870  | -7.085971504  | 3.936192128  |
| H308 | 6.001227143  | -5.317592646  | 3.560951312  |
| H309 | 5.873514039  | -4.903554885  | 5.278649638  |
| H310 | -3.681439928 | -0.649794906  | -7.291364571 |
| H311 | 4.949157206  | -9.276031647  | 5.874519048  |
| H312 | 4.203664399  | -11.666183732 | 4.086018565  |
| H313 | 1.001423499  | -0.019139828  | -3.754616996 |
| H314 | 5.175663010  | -11.628334626 | 6.834821649  |
| H315 | 3.671559094  | -11.928910989 | 6.261180953  |
| H316 | 5.101170668  | -3.036624480  | 2.803786612  |
| H317 | 0.307990541  | 2.167269217   | -4.684087310 |
| H318 | -2.097867159 | -1.966239740  | -6.027596330 |
| H319 | 7.887069083  | -9.739053073  | -0.156089923 |
| H320 | 7.394028141  | -7.442623613  | -2.628571694 |
| H321 | 6.507026577  | -8.083999872  | 1.007274314  |
| H322 | 7.359029183  | -10.402615643 | -1.441374164 |
| H323 | 6.645770586  | 3.133277781   | -8.170567647 |
| H324 | 6.429307879  | -4.908789341  | 0.799012977  |
| H325 | 2.334567447  | -7.205712335  | 1.213667187  |
| H326 | 4.811954519  | -1.491721053  | -6.910392259 |
| H327 | 3.166055946  | -8.876649562  | -0.499496303 |
| H328 | 4.669758147  | -6.455650349  | -6.562653807 |
| H329 | 3.399277009  | -5.072859777  | -4.851488802 |
| H330 | 5.755366638  | -12.281827362 | 4.664147858  |
| H331 | 4.694006226  | -0.855610096  | 2.445434830  |
| H332 | 8.174172610  | -5.763465364  | 2.228730152  |
| H333 | 7.296606487  | -3.661608853  | 1.118104211  |
| H334 | 8.358658159  | -6.796187629  | 4.368438480  |
| H335 | 3.558238092  | -2.538974770  | 5.999988249  |
| H336 | 3.559885041  | -11.398571887 | -3.405038061 |
| H337 | 4.162875294  | -7.917565115  | -3.231129690 |

|       |               |               |              |
|-------|---------------|---------------|--------------|
| H338  | 5.256577534   | -8.152831172  | -1.850513396 |
| H339  | 2.183590149   | -8.321805757  | -1.880722548 |
| H340  | 2.682622899   | -1.737258181  | -5.786922177 |
| H341  | -1.597911955  | 2.305373532   | -6.315768248 |
| H342  | -3.623057379  | 1.128575572   | -7.321327560 |
| H343  | 2.071457890   | -5.522891714  | 0.656909230  |
| H344  | 8.277726976   | -7.306523072  | 2.093157499  |
| H345  | 7.030383237   | -9.186306737  | 1.969947074  |
| H346  | 2.972415297   | -0.969769904  | 5.585212914  |
| H347  | 6.954241105   | -7.221248939  | -5.677601837 |
| H348  | 7.018845610   | -5.901136877  | -1.857944577 |
| H349  | 2.050495111   | -2.539523321  | -7.256324757 |
| H350  | 5.250082345   | 4.733246541   | -6.246884869 |
| H351  | 6.193772743   | -0.136207775  | 5.705270090  |
| H352  | 6.738053868   | 0.357249104   | 4.082452327  |
| H353  | 10.220156621  | -6.049723977  | -4.555271672 |
| H354  | 9.509946219   | -7.468988458  | -4.158682857 |
| H355  | 10.606245775  | -8.487221015  | 0.113354488  |
| H356  | 9.080413842   | -7.962830221  | -1.497993840 |
| H357  | 12.346928894  | -7.231444694  | -1.595419756 |
| H358  | 10.350396755  | -6.834246960  | 0.719093189  |
| H359  | 9.361387523   | -0.153380353  | 4.736872490  |
| H360  | -3.685449660  | 13.055497293  | 3.489216640  |
| H361  | 9.033936400   | -6.930755831  | 7.298415745  |
| H362  | 8.599352940   | -4.435720730  | 6.229703835  |
| H363  | -5.075292479  | 12.262902258  | 0.905056336  |
| H364  | -4.440311835  | 10.127958381  | 3.032896648  |
| H365  | -6.060581063  | 10.689027596  | 2.581122146  |
| H366  | -5.852169289  | 7.075730764   | -2.794109134 |
| H367  | 2.210762400   | -0.698185981  | -0.108702323 |
| H368  | -0.983903636  | -0.055422242  | -0.937488124 |
| Mo369 | 4.207222962   | -4.079029617  | -1.786570931 |
| N370  | -6.381248974  | -7.052284817  | -2.213011916 |
| N371  | -8.814860140  | -4.662621499  | -0.681749719 |
| N372  | -9.203458199  | -5.112169725  | 2.096125865  |
| N373  | -6.758561925  | -6.242039791  | 2.895980746  |
| N374  | -4.943169067  | -4.075591806  | 2.367422174  |
| N375  | -5.973763633  | -2.170542702  | 4.221210120  |
| N376  | -5.879053856  | -3.530227354  | 6.781121424  |
| N377  | -3.352170792  | -4.882848290  | 7.056003852  |
| N378  | -1.317236217  | -3.228444186  | 6.132535295  |
| N379  | -1.710909483  | -0.301972715  | 6.496366229  |
| N380  | -3.006313141  | -0.376443615  | 9.102647778  |
| N381  | 4.486358886   | -11.325256852 | 6.143713570  |
| N382  | 5.489892448   | -9.101163976  | 5.020639202  |
| N383  | 4.579019128   | -3.072467351  | 3.683346051  |
| N384  | 3.399001257   | -1.840521928  | 5.281782768  |
| N385  | 4.157487108   | -0.818123170  | 3.334107329  |
| N386  | 8.211782600   | -6.914698134  | 5.394456181  |
| N387  | -5.064051742  | -2.809847647  | -4.027752854 |
| N388  | -1.016406651  | -5.265114448  | -3.537625771 |
| N389  | -5.508334999  | -0.300922654  | -3.385373109 |
| N390  | -8.045260030  | 0.447553983   | -2.585678689 |
| N391  | -7.922361353  | 0.249462661   | 0.174230598  |
| N392  | -5.869486661  | 1.948672202   | 1.129682533  |
| N393  | -2.647912862  | 2.611597734   | -1.588672718 |
| N394  | -1.712465349  | 0.760945538   | -0.935990154 |
| N395  | -6.730755642  | 4.560513511   | 1.550254867  |
| N396  | -9.715319592  | 7.577640058   | -0.516124235 |
| N397  | -10.039124984 | 9.301126792   | 0.843036871  |
| N398  | 8.482543562   | 2.266136246   | 4.919942157  |

|      |               |               |               |
|------|---------------|---------------|---------------|
| N399 | 6.235206845   | 7.639200767   | 1.524554665   |
| N400 | 4.800576814   | 8.687279721   | -1.548455313  |
| N401 | 2.384629044   | 7.792241866   | -2.612677485  |
| N402 | -1.857096138  | 6.394553152   | -4.774384548  |
| N403 | -1.491843567  | 8.362588688   | -5.990359027  |
| N404 | -3.104051315  | 8.305634673   | -4.329149626  |
| N405 | 0.895124650   | 6.519282756   | -0.527081129  |
| N406 | 0.769250513   | 8.650764112   | 1.295518133   |
| N407 | -0.464993485  | 11.142138864  | 0.745759328   |
| N408 | -1.187281769  | 10.308513293  | -2.315356016  |
| N409 | -3.086919873  | 11.745453623  | 1.350495136   |
| N410 | 6.130933496   | -3.992455739  | -9.560041641  |
| N411 | 4.073566215   | -2.073917612  | -7.317524494  |
| N412 | 2.755863723   | 0.668253747   | -6.848364678  |
| N413 | 4.685974758   | 2.743062233   | -6.504876606  |
| N414 | 0.496520195   | -2.608524597  | -10.296826439 |
| N415 | -1.419962256  | -0.874378733  | -9.015071173  |
| N416 | 9.315686942   | -6.478733623  | -4.338143562  |
| N417 | 5.127327658   | -5.386442793  | -3.603597557  |
| N418 | 5.036892626   | -6.217939775  | -5.645476366  |
| N419 | 9.749158050   | -7.221612057  | -1.289456081  |
| N420 | 0.446844819   | 1.811099584   | 0.816650086   |
| N421 | 1.280982796   | 1.394744762   | 0.174834319   |
| O422 | -6.681288924  | -5.170589620  | -0.063465456  |
| O423 | -8.222545816  | -3.094615726  | 2.496353465   |
| O424 | -7.213369866  | -5.618379926  | 5.048120635   |
| O425 | -3.758096772  | -4.847700806  | 4.148385325   |
| O426 | -3.867445231  | -1.320125024  | 4.368679383   |
| O427 | -5.360480436  | -1.480451814  | 7.649800445   |
| O428 | -3.606934572  | -4.748661442  | 9.334817900   |
| O429 | 0.300466127   | -4.705353432  | 6.832938414   |
| O430 | 0.503591054   | -0.474410532  | 7.038870979   |
| O431 | -1.460090692  | 1.189288713   | 9.660392698   |
| O432 | -1.946407072  | -0.844959855  | 12.494688612  |
| O433 | 6.374253807   | -10.242334920 | 3.213041348   |
| O434 | 6.770153547   | -7.587955357  | 7.056649464   |
| O435 | 10.577532872  | -4.560438363  | 6.710546691   |
| O436 | -5.387752880  | -0.648908658  | -1.122461650  |
| O437 | -2.720120908  | -4.291712924  | -4.687582619  |
| O438 | -7.504520289  | 2.668707948   | -2.652827918  |
| O439 | -5.549189970  | 3.289461671   | -4.405242143  |
| O440 | -10.052500029 | 1.093076860   | 0.378430813   |
| O441 | -6.561111513  | 1.606957881   | 3.278167904   |
| O442 | -4.940403368  | 4.938128780   | 2.920109035   |
| O443 | -7.745936297  | 6.933096208   | 3.977165092   |
| O444 | 8.945427352   | -0.793098912  | 6.630718571   |
| O445 | 2.556717749   | 4.801896318   | 4.885786415   |
| O446 | 3.692082701   | 8.699113235   | 0.441614879   |
| O447 | 1.640392525   | 9.952140845   | -2.860213122  |
| O448 | -0.978915506  | 7.094901461   | -1.708834712  |
| O449 | -1.059101734  | 7.690641828   | 2.292663049   |
| O450 | 1.936474476   | 5.899425040   | 2.279751161   |
| O451 | 0.384637975   | 12.038267044  | 2.674446129   |
| O452 | -2.862551572  | 13.899443638  | 0.631279938   |
| O453 | -3.029987614  | 11.635201714  | -2.059248498  |
| O454 | -5.656285859  | 13.469604280  | 3.147128589   |
| O455 | -4.998636632  | 7.017462502   | -2.322660760  |
| O456 | 3.602080321   | -4.046597094  | -8.398819370  |
| O457 | 1.484121779   | -0.359935245  | -8.453969712  |
| O458 | 3.268184352   | 4.235864941   | -7.501323889  |
| O459 | 7.891405759   | 4.322029249   | -7.072861908  |

|  |                            |              |               |              |
|--|----------------------------|--------------|---------------|--------------|
|  | O460                       | -2.974009412 | -2.335257915  | -9.825452145 |
|  | O461                       | 0.037985622  | -6.292833916  | -6.303034158 |
|  | O462                       | 2.017079280  | -5.354055269  | -6.726023939 |
|  | O463                       | -2.197852217 | 2.599299871   | -8.882297996 |
|  | O464                       | 10.520193377 | -5.113838764  | -1.601401629 |
|  | O465                       | 12.938931341 | -6.834978651  | 0.316240227  |
|  | O466                       | -0.076113657 | -6.125440593  | -0.707693254 |
|  | O467                       | 0.251664276  | -8.193250020  | 0.041461050  |
|  | O468                       | 5.462222081  | -10.612814860 | -2.407635615 |
|  | O469                       | 3.363070666  | -10.454090514 | -3.226344992 |
|  | O470                       | 5.254900216  | -5.557074289  | -0.464253582 |
|  | O471                       | 4.905105636  | -7.376180042  | 0.817210198  |
|  | O472                       | 2.972803777  | -5.769611916  | -1.746143424 |
|  | O473                       | 8.655852025  | -6.542964058  | 2.604203124  |
|  | O474                       | 7.001077042  | -4.508806781  | 1.503268405  |
|  | O475                       | -3.700969336 | 4.894047099   | -3.173581812 |
|  | O476                       | 8.186912868  | -10.270935948 | -0.935769270 |
|  | O477                       | 7.333874642  | -8.592909099  | 1.233414323  |
|  | S478                       | 4.119729016  | 5.251522476   | -1.095326590 |
|  | S479                       | 2.627525184  | 2.212702325   | -2.479455504 |
|  | S480                       | 2.714564537  | -2.946960912  | -3.209370361 |
|  | S481                       | 4.019974036  | 1.883664636   | 0.833464155  |
|  | S482                       | 0.417371551  | -1.602243701  | -1.374859595 |
|  | S483                       | 5.037983828  | -0.236509723  | -4.677911601 |
|  | S484                       | 3.473076137  | -3.124160642  | 0.299275416  |
|  | S485                       | 6.247621245  | 2.010983566   | -1.858948524 |
|  | S486                       | 6.245187621  | -2.889535296  | -2.166877599 |
|  | S487                       | 6.424818895  | -0.827573802  | 0.905510641  |
|  | <b><math>9^2(a)</math></b> |              |               |              |
|  | Fe( 139)                   | 0.560        | -2.460        |              |
|  | Fe( 140)                   | 0.352        | -0.024        |              |
|  | Fe( 141)                   | 0.565        | -2.818        |              |
|  | Fe( 142)                   | 0.561        | 2.588         |              |
|  | Fe( 143)                   | 0.603        | 3.195         |              |
|  | Fe( 144)                   | 0.500        | 2.206         |              |
|  | Fe( 145)                   | 0.386        | -0.605        |              |
|  | <b><math>S=3/2</math></b>  |              |               |              |
|  | bm2cnx2622n2x35z2unh.car_4 |              |               |              |
|  | C1                         | -7.682560406 | -5.386185557  | -0.805825481 |
|  | C2                         | -7.686944088 | -6.469232258  | -1.891081058 |
|  | C3                         | -8.929983562 | -3.544746426  | 0.237879091  |
|  | C4                         | -8.755830959 | -3.904846665  | 1.711865792  |
|  | C5                         | -9.038550420 | -5.571969275  | 3.473980920  |
|  | C6                         | -7.577649809 | -5.803611625  | 3.876956324  |
|  | C7                         | -5.318432418 | -6.373151031  | 3.123418735  |
|  | C8                         | -4.597255307 | -5.028347826  | 3.254993547  |
|  | C9                         | -4.348588590 | -2.739660465  | 2.458910566  |
|  | C10                        | -4.703383565 | -2.006987493  | 3.761884267  |
|  | C11                        | -6.380660580 | -1.516245763  | 5.451510581  |
|  | C12                        | -5.808056180 | -2.167051793  | 6.718828322  |
|  | C13                        | -5.532656854 | -4.240733066  | 7.995082416  |
|  | C14                        | -4.064159725 | -4.642290224  | 8.184214158  |
|  | C15                        | -1.990364447 | -5.397269239  | 7.097795393  |
|  | C16                        | -0.894827013 | -4.403612240  | 6.700631184  |
|  | C17                        | -0.416704316 | -2.211844422  | 5.642999655  |
|  | C18                        | -0.512166041 | -0.928184288  | 6.488490573  |
|  | C19                        | -0.609129526 | -1.980521382  | 4.120461742  |
|  | C20                        | 0.233201861  | -0.809750021  | 3.602721201  |
|  | C21                        | -0.294115835 | -3.258735758  | 3.334069786  |
|  | C22                        | -1.926558052 | 0.915763745   | 7.307071516  |
|  | C23                        | -2.112539068 | 0.598772032   | 8.804808025  |
|  | C24                        | -3.085327206 | 1.766709451   | 6.732451976  |
|  | C25                        | -3.384639585 | 2.975790728   | 7.627230160  |
|  | C26                        | -2.763312917 | 2.230336067   | 5.305394391  |
|  | C27                        | -3.287100171 | -0.649486140  | 10.524624739 |
|  | C28                        | -2.027091374 | -0.981144451  | 11.297942042 |
|  | C29                        | 5.038500810  | -11.477318004 | 4.810366459  |
|  | C30                        | 5.719899689  | -10.210740536 | 4.289351175  |
|  | C31                        | 5.996140609  | -7.770658055  | 4.752061923  |



|     |               |              |              |
|-----|---------------|--------------|--------------|
| C32 | 7.021297219   | -7.423860333 | 5.848960125  |
| C33 | 4.848861874   | -6.744528481 | 4.703808684  |
| C34 | 5.319738007   | -5.319448754 | 4.401038763  |
| C35 | 4.143933820   | -4.401460090 | 4.071829975  |
| C36 | 4.064633456   | -1.900191886 | 4.061070639  |
| C37 | 9.277609504   | -6.579805982 | 6.302804124  |
| C38 | 9.498150388   | -5.086365699 | 6.426240629  |
| C39 | -4.795003457  | -2.496697186 | -2.624874842 |
| C40 | -5.270375756  | -1.074283188 | -2.288589213 |
| C41 | -3.283297652  | -2.573489470 | -2.308905267 |
| C42 | -2.674201646  | -3.990432273 | -2.266423216 |
| C43 | -2.147253714  | -4.515146044 | -3.599547197 |
| C44 | -5.771861271  | 1.120124035  | -3.273114681 |
| C45 | -7.195169160  | 1.477177898  | -2.820296837 |
| C46 | -5.409671696  | 1.871770234  | -4.569208358 |
| C47 | -9.280723276  | 0.641534248  | -1.841438692 |
| C48 | -9.116789252  | 0.685177301  | -0.313722335 |
| C49 | -7.629268879  | 0.270193579  | 1.602688259  |
| C50 | -6.636980744  | 1.328969106  | 2.089416679  |
| C51 | -4.883707728  | 2.958936908  | 1.546799329  |
| C52 | -5.550142468  | 4.230761484  | 2.129673463  |
| C53 | -4.036650084  | 3.429767204  | 0.354178399  |
| C54 | -3.156025625  | 2.421300251  | -0.318848420 |
| C55 | -2.568836939  | 1.239217407  | 0.066746158  |
| C56 | -1.803043410  | 1.716885564  | -1.951906075 |
| C57 | -7.418715110  | 5.825120362  | 1.844882488  |
| C58 | -7.753738182  | 5.902669569  | 3.332961310  |
| C59 | -8.708493153  | 5.873535683  | 0.993892534  |
| C60 | -9.278052653  | 7.239953181  | 0.741270498  |
| C61 | -9.458849716  | 8.314557680  | 1.591384302  |
| C62 | -10.168059291 | 8.814404061  | -0.447701654 |
| C63 | 7.865907949   | 1.196925027  | 5.718760255  |
| C64 | 8.801491520   | 0.002268622  | 5.719652708  |
| C65 | 6.533398973   | 0.714204067  | 5.088719146  |
| C66 | 5.473113552   | 1.789700804  | 5.059740087  |
| C67 | 4.577997742   | 1.965985042  | 6.131489100  |
| C68 | 5.354741037   | 2.650089563  | 3.952981129  |
| C69 | 3.597147119   | 2.964031392  | 6.100356788  |
| C70 | 4.389167355   | 3.657164985  | 3.912562575  |
| C71 | 3.509835647   | 3.810272138  | 4.988111124  |
| C72 | 5.620302079   | 7.228375390  | 0.244981989  |
| C73 | 4.624524717   | 8.275014135  | -0.265940093 |
| C74 | 4.903843049   | 5.887179006  | 0.449296795  |
| C75 | 3.918631907   | 9.660550265  | -2.167786140 |
| C76 | 2.541580261   | 9.134516689  | -2.576251171 |
| C77 | 1.115883114   | 7.147945116  | -2.917402816 |
| C78 | 0.254550393   | 6.912541734  | -1.657592169 |
| C79 | 1.393132505   | 5.858850140  | -3.710722369 |
| C80 | 0.184868549   | 5.045542646  | -4.182394054 |
| C81 | -0.681043313  | 5.654716515  | -5.298426447 |
| C82 | -2.148176396  | 7.662102719  | -5.073277610 |
| C83 | 0.145421967   | 6.321844298  | 0.702629635  |
| C84 | -0.111318038  | 7.625301732  | 1.483481539  |
| C85 | 0.807780077   | 5.315528606  | 1.654324412  |
| C86 | 0.877607380   | 9.723274749  | 2.258840024  |
| C87 | 0.248166482   | 11.067819992 | 1.903989339  |
| C88 | -0.982438281  | 12.409578320 | 0.248310983  |
| C89 | -2.401854247  | 12.747361681 | 0.750222737  |
| C90 | -0.905020749  | 12.495562378 | -1.292263152 |
| C91 | -1.796071947  | 11.454106427 | -1.959826374 |
| C92 | -4.469922497  | 11.883218445 | 1.757944713  |

|       |              |              |              |
|-------|--------------|--------------|--------------|
| C93   | -4.597062898 | 12.883662776 | 2.899932347  |
| C94   | -5.035934339 | 10.506854941 | 2.199654543  |
| C95   | -5.071568046 | 9.516969162  | 1.057684422  |
| C96   | -6.149644717 | 9.509967266  | 0.158190722  |
| C97   | -4.004203139 | 8.634691299  | 0.821619651  |
| C98   | -6.154895313 | 8.673105879  | -0.959518641 |
| C99   | -3.979539936 | 7.807550620  | -0.304738003 |
| C100  | -5.057448396 | 7.840410988  | -1.187416783 |
| C101  | 5.904375519  | -3.336186124 | -8.261222414 |
| C102  | 4.415717535  | -3.164645827 | -8.004881846 |
| C103  | 2.698548407  | -1.769682190 | -6.872865025 |
| C104  | 2.234263355  | -0.428951065 | -7.455815253 |
| C105  | 2.440337224  | 2.006221404  | -7.253934118 |
| C106  | 3.533888788  | 3.060710678  | -7.106155128 |
| C107  | 5.703586609  | 3.727544081  | -6.195269405 |
| C108  | 6.822255739  | 3.710819759  | -7.216341902 |
| C109  | -0.704556883 | -3.139767564 | -9.643636595 |
| C110  | -1.805349720 | -2.080900549 | -9.515100752 |
| C111  | -0.490720035 | -3.830988782 | -8.277902088 |
| C112  | 0.293431085  | -5.146455380 | -8.436057893 |
| C113  | 0.768353057  | -5.656236329 | -7.094442863 |
| C114  | -2.415628158 | 0.170991180  | -8.792791366 |
| C115  | -1.873091904 | 1.501150754  | -9.274825940 |
| C116  | -3.066169765 | 0.195926588  | -7.387734143 |
| C117  | -2.023680820 | 0.181427167  | -6.304714336 |
| C118  | -1.386076839 | 1.366332301  | -5.905301251 |
| C119  | -1.557525077 | -1.043689274 | -5.793585455 |
| C120  | -0.260795567 | 1.313750996  | -5.075363283 |
| C121  | -0.442660615 | -1.089547183 | -4.955765008 |
| C122  | 0.234328673  | 0.089163117  | -4.622574099 |
| C123  | 8.793888535  | -5.853632731 | -3.123987569 |
| C124  | 9.757455912  | -6.029273842 | -1.937686920 |
| C125  | 7.387941876  | -6.400066439 | -2.832823258 |
| C126  | 6.345554206  | -6.130721497 | -3.876892406 |
| C127  | 6.277408763  | -6.637125273 | -5.160001955 |
| C128  | 4.441306897  | -5.474986254 | -4.723399203 |
| C129  | 10.652673163 | -7.424273409 | -0.155690685 |
| C130  | 12.091933205 | -7.136619484 | -0.522986137 |
| C131  | 0.728735720  | -6.881984519 | -0.155395895 |
| C132  | 2.114880287  | -6.609713626 | 0.354503239  |
| C133  | 3.230328239  | -6.785017944 | -0.760249700 |
| C134  | 3.181659365  | -8.237562782 | -1.320859741 |
| C135  | 4.341881953  | -8.518345417 | -2.290887504 |
| C136  | 4.498093131  | -9.968181978 | -2.644402646 |
| C137  | 4.602709668  | -6.628229086 | -0.030624127 |
| C138  | 4.084539335  | -0.552068629 | -1.494503405 |
| Fe139 | 4.547104179  | -1.687933248 | -3.026139921 |
| Fe140 | 2.396645552  | 0.629103088  | -0.704976007 |
| Fe141 | 5.343434507  | 0.607549725  | -0.347328697 |
| Fe142 | 4.314524708  | 0.887433398  | -2.726620810 |
| Fe143 | 4.186338247  | 2.931902296  | -1.031620993 |
| Fe144 | 5.175149781  | -1.930914508 | -0.521121244 |
| Fe145 | 2.654393624  | -1.840281438 | -1.192802161 |
| H146  | -5.924084957 | -7.346199555 | -1.358893252 |
| H147  | -5.788947676 | -6.347251713 | -2.642488691 |
| H148  | -9.574264577 | -4.801819460 | -1.365222335 |
| H149  | -8.147119826 | -6.060739494 | -2.804758345 |
| H150  | -8.366090012 | -7.265853638 | -1.541350774 |
| H151  | -8.160715035 | -2.792525846 | 0.014613962  |
| H152  | -9.635350593 | -5.735942264 | 1.411641719  |
| H153  | -9.915945436 | -3.078254145 | 0.106190525  |

|      |              |              |               |
|------|--------------|--------------|---------------|
| H154 | -9.591724123 | -6.511581124 | 3.602880941   |
| H155 | -7.082649337 | -6.233386096 | 1.931118963   |
| H156 | -9.449218693 | -4.831968351 | 4.172855663   |
| H157 | -3.253051847 | -2.798387718 | 2.416693775   |
| H158 | -5.579960058 | -4.283547026 | 1.594984681   |
| H159 | -4.883092062 | -6.946092090 | 2.293598223   |
| H160 | -6.060580797 | -0.466734029 | 5.452165957   |
| H161 | -6.661591008 | -2.678025084 | 3.661655691   |
| H162 | -5.142579508 | -6.921213652 | 4.056415481   |
| H163 | -4.692969261 | -2.145251140 | 1.599675975   |
| H164 | -6.320361035 | -4.047419004 | 6.021492684   |
| H165 | -7.477759865 | -1.546129570 | 5.507201702   |
| H166 | -0.928560984 | -4.100583032 | 3.647845614   |
| H167 | -0.451902701 | -3.088451712 | 2.258420299   |
| H168 | 0.760361317  | -3.549219157 | 3.468362352   |
| H169 | -1.670788392 | -1.728426600 | 3.963368907   |
| H170 | -6.131697159 | -5.162303783 | 8.024761770   |
| H171 | -2.602677972 | 1.389028933  | 4.616954406   |
| H172 | -3.627724500 | -0.780701198 | 8.421988501   |
| H173 | -3.677794476 | 2.684155957  | 8.646401667   |
| H174 | 0.012804100  | -0.627343925 | 2.541600703   |
| H175 | 1.307125409  | -1.032161066 | 3.667629128   |
| H176 | 7.665244600  | 1.464294459  | 6.774479907   |
| H177 | -3.593177705 | 2.838705835  | 4.916052814   |
| H178 | -4.204936536 | 3.565191523  | 7.191966080   |
| H179 | -1.856220128 | 2.856289764  | 5.301318776   |
| H180 | -2.501767543 | 3.630931758  | 7.704021032   |
| H181 | -3.986946594 | 1.128050792  | 6.701628695   |
| H182 | -0.996984226 | 1.501878559  | 7.264853297   |
| H183 | -2.481292532 | -0.626586648 | 5.913917809   |
| H184 | 0.040032836  | 0.126319876  | 4.147911542   |
| H185 | 1.122169078  | 4.430354669  | 1.076049160   |
| H186 | 0.043864629  | 5.004200024  | 2.384602431   |
| H187 | 2.065022137  | 5.467855208  | 3.159025030   |
| H188 | 1.964123935  | 4.767231385  | 5.667327751   |
| H189 | 4.290293266  | 4.292920951  | 3.032365105   |
| H190 | 6.000721679  | 2.503175416  | 3.084825032   |
| H191 | 4.635364254  | 1.307552790  | 7.003201020   |
| H192 | -2.321400643 | -3.128253166 | 5.996623311   |
| H193 | -1.887886653 | -6.268296756 | 6.432827293   |
| H194 | -1.775206406 | -5.725042814 | 8.122621497   |
| H195 | -3.820335096 | -4.893729253 | 6.136451513   |
| H196 | -5.801696395 | -3.628977935 | 8.865707545   |
| H197 | 2.897218509  | 3.079051203  | 6.932719776   |
| H198 | 0.597303349  | -2.592709049 | 5.822375801   |
| H199 | -3.809974220 | 0.177673788  | 11.031617089  |
| H200 | -3.938062704 | -1.537412938 | 10.564722140  |
| H201 | -1.201724019 | -1.416823106 | 10.688279515  |
| H202 | 10.220637539 | -7.062983511 | 6.004507319   |
| H203 | -0.617251346 | -5.614881168 | -4.406783804  |
| H204 | 0.931480454  | -8.697103607 | 0.470667098   |
| H205 | -0.361568713 | -5.907508210 | -8.884341042  |
| H206 | 1.152854289  | -4.993887493 | -9.105229605  |
| H207 | -1.461528317 | -4.046597489 | -7.805214125  |
| H208 | -1.083521854 | 1.416130258  | -10.058709176 |
| H209 | -1.138198683 | -3.884591554 | -10.328453163 |
| H210 | -2.737546575 | -1.951047392 | -3.035849519  |
| H211 | -3.425140186 | -4.717617188 | -1.909203582  |
| H212 | -0.464997051 | -0.720153758 | -8.697042631  |
| H213 | -3.226533444 | -0.054558967 | -9.516120031  |
| H214 | 1.014243915  | -1.980064364 | -9.655165446  |

|      |               |              |               |
|------|---------------|--------------|---------------|
| H215 | -0.502040857  | -5.374432762 | -2.666169283  |
| H216 | 0.036633969   | -3.134979062 | -7.608431809  |
| H217 | 1.122281268   | -3.355371267 | -10.552168341 |
| H218 | -5.952330068  | -3.340986924 | -4.114711706  |
| H219 | -3.129578406  | -2.112345802 | -1.322631019  |
| H220 | 2.514357955   | -4.821485256 | -7.462834992  |
| H221 | -1.861474059  | -4.003043362 | -1.527529114  |
| H222 | -4.244130956  | 2.561010111  | 2.348632913   |
| H223 | -2.659327879  | 0.674749670  | 0.987269347   |
| H224 | -8.569752771  | 0.449026529  | 2.138490805   |
| H225 | -7.189436678  | -0.085767432 | -0.455535544  |
| H226 | -7.164208150  | 3.904526912  | 0.913760296   |
| H227 | -9.219538669  | 8.468258708  | 2.637946628   |
| H228 | -8.019467166  | 4.918334443  | 3.789698561   |
| H229 | -9.464789651  | 5.206844171  | 1.445524131   |
| H230 | -6.763495287  | 6.673355181  | 1.590160496   |
| H231 | -10.595537907 | 9.397894222  | -1.258936315  |
| H232 | -3.403361950  | 4.251456244  | 0.728675418   |
| H233 | -4.707277287  | 3.879539957  | -0.396905961  |
| H234 | -10.277413035 | 10.236775135 | 1.131248153   |
| H235 | -8.473754761  | 5.449074576  | 0.005165252   |
| H236 | -5.786115466  | 1.533351218  | 0.220473979   |
| H237 | -7.260246836  | -0.714828766 | 1.924594381   |
| H238 | -9.750078361  | 1.587005010  | -2.142005387  |
| H239 | -1.245987067  | 1.650667261  | -2.882554487  |
| H240 | -9.976012261  | -0.172223134 | -2.088991217  |
| H241 | 9.190841363   | 2.741434921  | 5.471938379   |
| H242 | 7.753010308   | 2.988326302  | 4.733754512   |
| H243 | 1.881892067   | 6.168087076  | -0.589441706  |
| H244 | -0.846873824  | 5.931501151  | 0.434526790   |
| H245 | 1.637158121   | 8.430312031  | 0.774190862   |
| H246 | -2.919374952  | 3.523793746  | -2.161452139  |
| H247 | -4.344713722  | 4.352598938  | -3.693130861  |
| H248 | -4.220276360  | 5.575357245  | -2.692782949  |
| H249 | -4.363752320  | 1.660876148  | -4.832814526  |
| H250 | -6.055183398  | 1.530509466  | -5.396087750  |
| H251 | 0.147624117   | 12.383959630 | -1.590752807  |
| H252 | -1.254807291  | 13.492000055 | -1.591424972  |
| H253 | -0.152164275  | 10.218045197 | -2.429154789  |
| H254 | -1.746289846  | 9.556389166  | -2.715531887  |
| H255 | -1.720180359  | 9.338698643  | -6.173078355  |
| H256 | -1.060884197  | 4.855454273  | -5.952422838  |
| H257 | -7.010749050  | 8.664807132  | -1.639698371  |
| H258 | -3.164379732  | 8.575470379  | 1.519677704   |
| H259 | -3.626741307  | 7.797214778  | -3.641055061  |
| H260 | 2.013574431   | 5.187519302  | -3.094942694  |
| H261 | 3.147012874   | 7.186441622  | -2.255588826  |
| H262 | -0.450459586  | 4.757996093  | -3.330086791  |
| H263 | -7.731255351  | -0.483152314 | -2.815378911  |
| H264 | 4.402109006   | 10.063744422 | -3.068005696  |
| H265 | -5.373064559  | -0.807325963 | -4.267275346  |
| H266 | 2.002754938   | 6.141149570  | -4.585243898  |
| H267 | -3.114495627  | 7.172987212  | -0.505882588  |
| H268 | -6.352506343  | 3.411322288  | -3.832666964  |
| H269 | 3.738935967   | 10.496688299 | -1.477727939  |
| H270 | -0.969228451  | 7.889743849  | -6.748031611  |
| H271 | -3.579576695  | 9.088249412  | -4.782584266  |
| H272 | -4.308947371  | -3.388818856 | -4.412926204  |
| H273 | -5.323349405  | -3.156484300 | -1.910809172  |
| H274 | -7.001346289  | 10.172458764 | 0.326624167   |
| H275 | -5.131653686  | 1.519182561  | -2.467367649  |

|      |              |               |              |
|------|--------------|---------------|--------------|
| H276 | 0.539743977  | 7.855885475   | -3.527920775 |
| H277 | -0.065607854 | 6.311783882   | -5.926210810 |
| H278 | 0.602911496  | 4.106888237   | -4.568627870 |
| H279 | -2.482588508 | 5.882784058   | -4.162134285 |
| H280 | 0.413558891  | 9.402248336   | 3.203603969  |
| H281 | -0.440361301 | 10.326743302  | 0.117220692  |
| H282 | -0.343636871 | 13.199886347  | 0.668843668  |
| H283 | 1.940447142  | 9.918929631   | 2.456398788  |
| H284 | -2.634789653 | 10.827246442  | 1.396291855  |
| H285 | 6.404570134  | -2.357047377  | -8.243640227 |
| H286 | 6.293076954  | -3.912432470  | -7.396054485 |
| H287 | 8.724391072  | -4.767864058  | -3.283209630 |
| H288 | 7.100844926  | -4.292266417  | -9.606262757 |
| H289 | 5.552156121  | -4.826075219  | -9.600320187 |
| H290 | 5.649475822  | 5.142529679   | 0.756104673  |
| H291 | 5.507699261  | 7.892684118   | 2.171023050  |
| H292 | 5.528896926  | 8.254577171   | -2.110309215 |
| H293 | 4.152666296  | 5.995582182   | 1.244631653  |
| H294 | 6.789625831  | 8.497670576   | 1.358063887  |
| H295 | 6.129251256  | 3.568032611   | -5.192185843 |
| H296 | 6.417829689  | 7.089318282   | -0.502107549 |
| H297 | 4.304166380  | -6.775355048  | 5.662668527  |
| H298 | 6.490297711  | -7.800040656  | 3.773277061  |
| H299 | 4.772599084  | 1.830762555   | -5.963419625 |
| H300 | 4.009410535  | 0.105413138   | 3.667308308  |
| H301 | 2.140291497  | 1.990324141   | -8.310113836 |
| H302 | -0.093072494 | -2.036617111  | -4.537635827 |
| H303 | 1.572005314  | 2.382578726   | -6.687723288 |
| H304 | 3.463284110  | -4.307487216  | 4.927763079  |
| H305 | 3.297105469  | 0.468599907   | -5.967786107 |
| H306 | 3.556073013  | -4.829545011  | 3.242394932  |
| H307 | 4.154623719  | -7.080515830  | 3.917058537  |
| H308 | 6.000024340  | -5.323145420  | 3.536310143  |
| H309 | 5.879335152  | -4.904165123  | 5.254433174  |
| H310 | -3.719759599 | -0.685992145  | -7.311589858 |
| H311 | 4.916371793  | -9.269940249  | 5.860581920  |
| H312 | 4.222930224  | -11.689349669 | 4.101357483  |
| H313 | 1.103910104  | 0.058715538   | -3.965568482 |
| H314 | 5.163014222  | -11.613074732 | 6.861986983  |
| H315 | 3.671071920  | -11.947394018 | 6.273781693  |
| H316 | 5.058637792  | -3.036349611  | 2.740763088  |
| H317 | 0.250669613  | 2.225166609   | -4.761474704 |
| H318 | -2.070671597 | -1.970056436  | -6.064451379 |
| H319 | 7.881237659  | -9.749573629  | -0.144549506 |
| H320 | 7.452722125  | -7.494598743  | -2.694639396 |
| H321 | 6.518285029  | -8.096082110  | 1.026675963  |
| H322 | 7.348803766  | -10.405353597 | -1.434974930 |
| H323 | 6.625471420  | 3.094813557   | -8.128179836 |
| H324 | 6.475407558  | -4.936362335  | 0.785533864  |
| H325 | 2.357902187  | -7.256588735  | 1.211125227  |
| H326 | 4.789941266  | -1.509827339  | -6.845549117 |
| H327 | 3.230567463  | -8.942935741  | -0.475662063 |
| H328 | 4.697724693  | -6.427959166  | -6.595274541 |
| H329 | 3.462630730  | -5.028697157  | -4.855661561 |
| H330 | 5.770434475  | -12.296059891 | 4.700860054  |
| H331 | 4.706916202  | -0.859634584  | 2.393397310  |
| H332 | 8.204820324  | -5.752941947  | 2.232922499  |
| H333 | 7.198947270  | -3.607599648  | 1.147096987  |
| H334 | 8.351918244  | -6.800855529  | 4.370461381  |
| H335 | 3.592532233  | -2.509805468  | 5.966939139  |
| H336 | 3.597441293  | -11.429536405 | -3.437857096 |

|       |               |               |              |
|-------|---------------|---------------|--------------|
| H337  | 4.179460423   | -7.939819210  | -3.212546941 |
| H338  | 5.295076690   | -8.198074393  | -1.856045425 |
| H339  | 2.226121600   | -8.385015900  | -1.845208405 |
| H340  | 2.661583358   | -1.747946783  | -5.772330494 |
| H341  | -1.749308867  | 2.325047538   | -6.285262675 |
| H342  | -3.699688672  | 1.094983913   | -7.340180784 |
| H343  | 2.161249723   | -5.556737967  | 0.662754153  |
| H344  | 8.287796974   | -7.299345076  | 2.102556360  |
| H345  | 7.062140537   | -9.195808662  | 1.982208407  |
| H346  | 3.041926623   | -0.932828176  | 5.562137501  |
| H347  | 6.969637594   | -7.250814839  | -5.725034693 |
| H348  | 7.034598437   | -5.982264372  | -1.881497159 |
| H349  | 2.036313458   | -2.552122282  | -7.247115915 |
| H350  | 5.248739603   | 4.731413804   | -6.211924793 |
| H351  | 6.183024647   | -0.145800026  | 5.679706885  |
| H352  | 6.738046055   | 0.363089904   | 4.064494309  |
| H353  | 10.270851854  | -6.005734655  | -4.539670213 |
| H354  | 9.570445527   | -7.439538383  | -4.182804865 |
| H355  | 10.595613396  | -8.486532760  | 0.131159828  |
| H356  | 9.044716371   | -7.936626159  | -1.455684038 |
| H357  | 12.344942363  | -7.280413103  | -1.600729677 |
| H358  | 10.369738184  | -6.824588789  | 0.724312314  |
| H359  | 9.356210944   | -0.145464499  | 4.761503600  |
| H360  | -3.669092381  | 13.038615724  | 3.503565330  |
| H361  | 9.003332423   | -6.949194055  | 7.306572615  |
| H362  | 8.598142715   | -4.453255161  | 6.234058212  |
| H363  | -5.070565036  | 12.267072675  | 0.917178075  |
| H364  | -4.427376660  | 10.119033035  | 3.033057820  |
| H365  | -6.050444421  | 10.682711538  | 2.584996995  |
| H366  | -5.847198149  | 7.082056045   | -2.802162204 |
| H367  | 2.459848714   | -0.803199020  | 0.150001964  |
| H368  | -0.959028047  | 0.057763583   | -0.965368174 |
| Mo369 | 4.308640927   | -4.126968798  | -1.781443255 |
| N370  | -6.396805414  | -7.051796221  | -2.217569333 |
| N371  | -8.836866984  | -4.674081525  | -0.676442947 |
| N372  | -9.205171593  | -5.123546403  | 2.100515299  |
| N373  | -6.749711625  | -6.240082891  | 2.894484221  |
| N374  | -4.940683644  | -4.066318386  | 2.361313416  |
| N375  | -5.971550986  | -2.164904266  | 4.215644307  |
| N376  | -5.870285777  | -3.523119618  | 6.775908035  |
| N377  | -3.356964076  | -4.906067624  | 7.050218387  |
| N378  | -1.321726036  | -3.236666320  | 6.152482718  |
| N379  | -1.722801698  | -0.299218374  | 6.515085556  |
| N380  | -3.014275042  | -0.364479734  | 9.126365014  |
| N381  | 4.477276735   | -11.331710012 | 6.158171484  |
| N382  | 5.467991299   | -9.103571281  | 5.012480052  |
| N383  | 4.594773803   | -3.066610082  | 3.654083967  |
| N384  | 3.400560427   | -1.827153044  | 5.240992720  |
| N385  | 4.159178435   | -0.823078796  | 3.279661614  |
| N386  | 8.200149885   | -6.928399000  | 5.395695648  |
| N387  | -5.081425248  | -2.813140073  | -4.028308178 |
| N388  | -1.007465841  | -5.230298568  | -3.541765207 |
| N389  | -5.512848476  | -0.300833577  | -3.377532513 |
| N390  | -8.044377324  | 0.455249624   | -2.578960303 |
| N391  | -7.919677027  | 0.255740642   | 0.179528939  |
| N392  | -5.871954337  | 1.959947048   | 1.142135935  |
| N393  | -2.662203208  | 2.690261492   | -1.593005215 |
| N394  | -1.748796403  | 0.822148281   | -0.964500939 |
| N395  | -6.740013322  | 4.562529356   | 1.563847681  |
| N396  | -9.725833438  | 7.565315173   | -0.528589991 |
| N397  | -10.021986837 | 9.305389245   | 0.815306205  |

|      |               |               |               |
|------|---------------|---------------|---------------|
| N398 | 8.461548114   | 2.275009474   | 4.927024280   |
| N399 | 6.250374710   | 7.640409188   | 1.510549922   |
| N400 | 4.807050853   | 8.698714233   | -1.548696446  |
| N401 | 2.389212848   | 7.794856059   | -2.610428538  |
| N402 | -1.841343946  | 6.400103150   | -4.792837864  |
| N403 | -1.490436020  | 8.362668791   | -6.018407465  |
| N404 | -3.093132767  | 8.308674256   | -4.347521109  |
| N405 | 0.902039356   | 6.516260053   | -0.530369048  |
| N406 | 0.774921655   | 8.646052318   | 1.284624309   |
| N407 | -0.465429323  | 11.135577933  | 0.740003147   |
| N408 | -1.172115496  | 10.306459989  | -2.331673934  |
| N409 | -3.080463671  | 11.740353144  | 1.351152567   |
| N410 | 6.128105807   | -3.979892281  | -9.560483047  |
| N411 | 4.061436168   | -2.081004274  | -7.290357239  |
| N412 | 2.754730673   | 0.651215510   | -6.844818024  |
| N413 | 4.677353429   | 2.733097801   | -6.452553689  |
| N414 | 0.492207236   | -2.591582037  | -10.296324759 |
| N415 | -1.434851111  | -0.878594863  | -8.994945307  |
| N416 | 9.367321071   | -6.448504872  | -4.348653227  |
| N417 | 5.185876665   | -5.400243703  | -3.626413188  |
| N418 | 5.070703517   | -6.210668378  | -5.675316647  |
| N419 | 9.747069665   | -7.220201784  | -1.275344216  |
| N420 | 0.360940126   | 1.787576908   | 1.034135739   |
| N421 | 1.118647592   | 1.314518612   | 0.331341160   |
| O422 | -6.710975951  | -5.197498680  | -0.050158876  |
| O423 | -8.234125223  | -3.101045876  | 2.500882776   |
| O424 | -7.207377126  | -5.625890887  | 5.049349300   |
| O425 | -3.757234530  | -4.830094148  | 4.146639658   |
| O426 | -3.870979840  | -1.299504021  | 4.351487617   |
| O427 | -5.359761423  | -1.471840313  | 7.646797157   |
| O428 | -3.604267233  | -4.755913725  | 9.328617671   |
| O429 | 0.295459460   | -4.708391479  | 6.865440312   |
| O430 | 0.470791579   | -0.505166966  | 7.116002629   |
| O431 | -1.467927599  | 1.201846281   | 9.679126994   |
| O432 | -1.929824585  | -0.852422073  | 12.509474674  |
| O433 | 6.415404399   | -10.270685779 | 3.253197841   |
| O434 | 6.750258354   | -7.598967745  | 7.050468076   |
| O435 | 10.572505213  | -4.590664499  | 6.728521668   |
| O436 | -5.418665782  | -0.666416873  | -1.115350037  |
| O437 | -2.753088460  | -4.318567948  | -4.678430042  |
| O438 | -7.497547427  | 2.674863053   | -2.636681993  |
| O439 | -5.543076992  | 3.291407821   | -4.395000915  |
| O440 | -10.058598343 | 1.076318591   | 0.386869535   |
| O441 | -6.562748189  | 1.604931346   | 3.289214845   |
| O442 | -4.977160410  | 4.930323836   | 2.970357396   |
| O443 | -7.778779579  | 6.936108118   | 3.979310421   |
| O444 | 8.936306176   | -0.768730603  | 6.660009700   |
| O445 | 2.558644099   | 4.808794633   | 4.895678875   |
| O446 | 3.710578027   | 8.728925284   | 0.448468303   |
| O447 | 1.649649875   | 9.955375536   | -2.882182600  |
| O448 | -0.973970956  | 7.108432777   | -1.705131089  |
| O449 | -1.061053039  | 7.696615222   | 2.276329679   |
| O450 | 1.918669063   | 5.933384594   | 2.310166695   |
| O451 | 0.380347435   | 12.031240322  | 2.670574246   |
| O452 | -2.864177680  | 13.889210596  | 0.617996857   |
| O453 | -3.021142269  | 11.623710861  | -2.068504447  |
| O454 | -5.639986431  | 13.458428693  | 3.168174928   |
| O455 | -4.993454308  | 7.025455533   | -2.330808043  |
| O456 | 3.600169331   | -4.027345988  | -8.425828570  |
| O457 | 1.452740455   | -0.371841583  | -8.433992534  |
| O458 | 3.321666986   | 4.193848365   | -7.572871916  |

|  |                          |              |               |              |
|--|--------------------------|--------------|---------------|--------------|
|  | O459                     | 7.871237273  | 4.320068190   | -7.072146857 |
|  | O460                     | -2.978494882 | -2.328750399  | -9.844936161 |
|  | O461                     | 0.052103154  | -6.278942271  | -6.314703246 |
|  | O462                     | 2.035402294  | -5.356896534  | -6.753091444 |
|  | O463                     | -2.281544367 | 2.593444866   | -8.906497974 |
|  | O464                     | 10.592149951 | -5.152520268  | -1.645327168 |
|  | O465                     | 12.951951028 | -6.854010858  | 0.300419839  |
|  | O466                     | -0.003167448 | -6.075308728  | -0.711478041 |
|  | O467                     | 0.256564762  | -8.163438597  | 0.009253246  |
|  | O468                     | 5.494708912  | -10.656322962 | -2.432309281 |
|  | O469                     | 3.398190045  | -10.486643180 | -3.254737058 |
|  | O470                     | 5.336589085  | -5.647913256  | -0.438089934 |
|  | O471                     | 4.942915358  | -7.456480427  | 0.850887958  |
|  | O472                     | 3.066316141  | -5.853466167  | -1.755454939 |
|  | O473                     | 8.670771803  | -6.539816141  | 2.616634113  |
|  | O474                     | 7.040280705  | -4.512744754  | 1.483673570  |
|  | O475                     | -3.689380445 | 4.908650709   | -3.188379464 |
|  | O476                     | 8.174553319  | -10.292621855 | -0.920213160 |
|  | O477                     | 7.357372420  | -8.599871717  | 1.246578369  |
|  | S478                     | 4.037232652  | 5.288084708   | -1.071932461 |
|  | S479                     | 2.454423431  | 2.215976433   | -2.441176321 |
|  | S480                     | 2.703531765  | -3.040802853  | -3.144870631 |
|  | S481                     | 3.836841646  | 1.752551869   | 0.836037422  |
|  | S482                     | 0.690923989  | -0.885869079  | -1.604160826 |
|  | S483                     | 4.927416483  | -0.177025049  | -4.645396319 |
|  | S484                     | 3.518785328  | -3.225167565  | 0.292454221  |
|  | S485                     | 6.135137680  | 2.052006236   | -1.880351149 |
|  | S486                     | 6.294626524  | -2.871514143  | -2.197808292 |
|  | S487                     | 6.474166561  | -0.856805354  | 0.919669881  |
|  | <b>9<sup>-2</sup>(b)</b> |              |               |              |
|  | Fe( 139)                 | 0.561        | 2.450         |              |
|  | Fe( 140)                 | 0.349        | 0.169         |              |
|  | Fe( 141)                 | 0.576        | 2.842         |              |
|  | Fe( 142)                 | 0.560        | -2.675        |              |
|  | Fe( 143)                 | 0.605        | 3.158         |              |
|  | Fe( 144)                 | 0.505        | -2.232        |              |
|  | Fe( 145)                 | 0.384        | -1.434        |              |
|  | <b>S=3/2</b>             |              |               |              |
|  | bm2cnx2622n2x47z2.car_2  |              |               |              |
|  | C1                       | -8.262326669 | -4.505173337  | -0.173509450 |
|  | C2                       | -8.434852314 | -5.659910488  | -1.166845080 |
|  | C3                       | -9.260183486 | -2.467570619  | 0.769120485  |
|  | C4                       | -9.072196187 | -2.738172094  | 2.259911602  |
|  | C5                       | -9.470535092 | -4.234300606  | 4.149462774  |
|  | C6                       | -8.027983884 | -4.588495314  | 4.526262281  |
|  | C7                       | -5.876228200 | -5.469048676  | 3.752369657  |
|  | C8                       | -5.001737063 | -4.212902719  | 3.749571660  |
|  | C9                       | -4.539846887 | -2.030444997  | 2.770094946  |
|  | C10                      | -4.756057346 | -1.162416724  | 4.019510606  |
|  | C11                      | -6.292971647 | -0.368232291  | 5.726770332  |
|  | C12                      | -5.748432788 | -0.987389596  | 7.021820455  |
|  | C13                      | -5.666888148 | -2.975149500  | 8.450086185  |
|  | C14                      | -4.248621652 | -3.533974547  | 8.616636333  |
|  | C15                      | -2.322249879 | -4.608489517  | 7.531432589  |
|  | C16                      | -1.135617869 | -3.774645365  | 7.036737131  |
|  | C17                      | -0.456960096 | -1.732278460  | 5.802596121  |
|  | C18                      | -0.378672585 | -0.389323919  | 6.551299953  |
|  | C19                      | -0.679850387 | -1.593637962  | 4.272233375  |
|  | C20                      | 0.264144047  | -0.565886782  | 3.640679036  |
|  | C21                      | -0.536652368 | -2.955673874  | 3.582022792  |
|  | C22                      | -1.536863195 | 1.661935073   | 7.267325458  |
|  | C23                      | -1.694852609 | 1.480364142   | 8.790660920  |
|  | C24                      | -2.606678794 | 2.605834053   | 6.666506148  |
|  | C25                      | -2.722606020 | 3.898850094   | 7.483289449  |
|  | C26                      | -2.279924035 | 2.930297782   | 5.203468030  |
|  | C27                      | -2.930352388 | 0.507778902   | 10.641262354 |
|  | C28                      | -1.685786935 | 0.072993406   | 11.390152173 |
|  | C29                      | 3.887559430  | -11.603783900 | 5.521232253  |
|  | C30                      | 4.674294910  | -10.460805813 | 4.881372547  |



|     |              |              |              |
|-----|--------------|--------------|--------------|
| C31 | 5.241892873  | -8.045235134 | 5.164601481  |
| C32 | 6.338466802  | -7.741472068 | 6.202997452  |
| C33 | 4.212014465  | -6.905426693 | 5.071949051  |
| C34 | 4.830903077  | -5.570217214 | 4.651655487  |
| C35 | 3.763089293  | -4.541287331 | 4.285520574  |
| C36 | 3.969783435  | -2.057489080 | 4.098624651  |
| C37 | 8.689819173  | -7.134587403 | 6.525957117  |
| C38 | 9.088631532  | -5.674028513 | 6.526130856  |
| C39 | -5.137618618 | -2.100629959 | -2.279218626 |
| C40 | -5.430915732 | -0.610777734 | -2.038902183 |
| C41 | -3.639598001 | -2.347783129 | -1.989871943 |
| C42 | -3.216764122 | -3.828283395 | -1.882082324 |
| C43 | -2.776944866 | -4.478761814 | -3.191911668 |
| C44 | -5.728069698 | 1.544811975  | -3.177438135 |
| C45 | -7.080257138 | 2.096537406  | -2.705617846 |
| C46 | -5.338290486 | 2.150888714  | -4.540328391 |
| C47 | -9.211324530 | 1.576906197  | -1.612623267 |
| C48 | -8.991448692 | 1.704237339  | -0.096566911 |
| C49 | -7.487191390 | 1.266251551  | 1.802044699  |
| C50 | -6.347295044 | 2.216986449  | 2.173675674  |
| C51 | -4.456706142 | 3.606670243  | 1.463316911  |
| C52 | -4.963375616 | 4.976890956  | 1.981426318  |
| C53 | -3.607713088 | 3.909410404  | 0.217748273  |
| C54 | -2.869688250 | 2.767854465  | -0.415371987 |
| C55 | -2.398950522 | 1.558356770  | 0.037734980  |
| C56 | -1.682171232 | 1.798622748  | -2.039185186 |
| C57 | -6.640732128 | 6.756090518  | 1.611694859  |
| C58 | -6.914747937 | 6.996426112  | 3.094684928  |
| C59 | -7.937376482 | 6.890493753  | 0.778634545  |
| C60 | -8.357897591 | 8.290295832  | 0.435928703  |
| C61 | -8.381711414 | 9.438957103  | 1.202860042  |
| C62 | -9.110111461 | 9.863364591  | -0.846759699 |
| C63 | 8.142193489  | 0.698786784  | 5.396735037  |
| C64 | 8.949098144  | -0.582816078 | 5.468164648  |
| C65 | 6.748318946  | 0.323364949  | 4.826457743  |
| C66 | 5.815736849  | 1.508259858  | 4.747885373  |
| C67 | 4.992541450  | 1.861912471  | 5.832559591  |
| C68 | 5.754253976  | 2.299063617  | 3.587814628  |
| C69 | 4.139152420  | 2.968701803  | 5.765821115  |
| C70 | 4.917002067  | 3.412215202  | 3.510679348  |
| C71 | 4.110631678  | 3.745366277  | 4.601209295  |
| C72 | 6.417491941  | 6.527531116  | -0.465425584 |
| C73 | 5.520980820  | 7.635618822  | -1.031293823 |
| C74 | 5.568260183  | 5.294446004  | -0.132333143 |
| C75 | 4.911242784  | 8.951768829  | -3.014092398 |
| C76 | 3.466233116  | 8.565652580  | -3.335864170 |
| C77 | 1.810280021  | 6.739358455  | -3.488468090 |
| C78 | 0.974853676  | 6.691355838  | -2.190668003 |
| C79 | 1.907427673  | 5.375762867  | -4.195443853 |
| C80 | 0.598410629  | 4.674443104  | -4.570753287 |
| C81 | -0.235989305 | 5.297504870  | -5.702940343 |
| C82 | -1.454415847 | 7.473897632  | -5.593745331 |
| C83 | 0.890050083  | 6.298575709  | 0.212365013  |
| C84 | 0.811331821  | 7.676496694  | 0.899241248  |
| C85 | 1.464854369  | 5.291350045  | 1.216664770  |
| C86 | 2.056517154  | 9.698287857  | 1.485896822  |
| C87 | 1.560423140  | 11.072491516 | 1.045378835  |
| C88 | 0.439220687  | 12.425718064 | -0.673267988 |
| C89 | -0.907691493 | 12.963027989 | -0.145973504 |
| C90 | 0.457158063  | 12.395436097 | -2.218210923 |
| C91 | -0.563631039 | 11.415218312 | -2.781903239 |

|       |               |               |              |
|-------|---------------|---------------|--------------|
| C92   | -3.029199426  | 12.419350330  | 0.967865746  |
| C93   | -2.985932128  | 13.502212167  | 2.039655527  |
| C94   | -3.734300887  | 11.151916059  | 1.526167862  |
| C95   | -3.920097411  | 10.093081734  | 0.464333719  |
| C96   | -5.023002327  | 10.140796039  | -0.402148524 |
| C97   | -2.969039449  | 9.077876406   | 0.273206597  |
| C98   | -5.164703238  | 9.220718897   | -1.443490675 |
| C99   | -3.079042201  | 8.165453984   | -0.780566044 |
| C100  | -4.177236921  | 8.254541300   | -1.633480770 |
| C101  | 5.177069320   | -4.574802697  | -8.150902607 |
| C102  | 3.726575617   | -4.219256840  | -7.867852930 |
| C103  | 2.218662824   | -2.552401420  | -6.810905950 |
| C104  | 1.894792319   | -1.210598019  | -7.478522161 |
| C105  | 2.378784415   | 1.192728090   | -7.472295809 |
| C106  | 3.586467492   | 2.123888225   | -7.418494922 |
| C107  | 5.853075315   | 2.589185856   | -6.621779899 |
| C108  | 6.924376740   | 2.362411699   | -7.668498789 |
| C109  | -1.414764066  | -3.728469157  | -9.344150534 |
| C110  | -2.385459686  | -2.545926916  | -9.256757493 |
| C111  | -1.231522953  | -4.348399560  | -7.940717891 |
| C112  | -0.608263061  | -5.754071905  | -8.023491001 |
| C113  | -0.143250437  | -6.207788984  | -6.658308342 |
| C114  | -2.715636789  | -0.192675492  | -8.693289559 |
| C115  | -2.049873851  | 1.035493911   | -9.278962742 |
| C116  | -3.316346104  | -0.004494455  | -7.280868925 |
| C117  | -2.236982910  | -0.053380789  | -6.236173707 |
| C118  | -1.476826342  | 1.086460882   | -5.938114336 |
| C119  | -1.862488527  | -1.286484698  | -5.667462423 |
| C120  | -0.324675620  | 0.977890062   | -5.151171097 |
| C121  | -0.718887196  | -1.387441533  | -4.874358249 |
| C122  | 0.076449283   | -0.259428642  | -4.641108290 |
| C123  | 7.952441969   | -7.043110629  | -2.906592529 |
| C124  | 8.938591169   | -7.244192388  | -1.743281117 |
| C125  | 6.507635322   | -7.407955098  | -2.534528248 |
| C126  | 5.462817120   | -7.083904481  | -3.560749971 |
| C127  | 5.298561912   | -7.658572103  | -4.804850876 |
| C128  | 3.610630672   | -6.282940459  | -4.398049477 |
| C129  | 9.735286891   | -8.590877442  | 0.119393983  |
| C130  | 11.180508107  | -8.532360408  | -0.323647311 |
| C131  | -0.057142544  | -6.911723758  | 0.343658437  |
| C132  | 1.365486128   | -6.793144867  | 0.808718899  |
| C133  | 2.409402592   | -7.158333751  | -0.328368852 |
| C134  | 2.172454022   | -8.621426160  | -0.800919183 |
| C135  | 3.264677727   | -9.101882800  | -1.772160241 |
| C136  | 3.246823944   | -10.581750217 | -2.016337178 |
| C137  | 3.821786271   | -7.118385002  | 0.334469727  |
| C138  | 3.941800825   | -1.123089292  | -1.562170769 |
| Fe139 | 4.215019411   | -2.402476939  | -3.022020068 |
| Fe140 | 2.463949159   | 0.229105577   | -0.800118756 |
| Fe141 | 5.309796421   | -0.044735422  | -0.547789009 |
| Fe142 | 4.329973832   | 0.188513383   | -2.968950471 |
| Fe143 | 4.346924208   | 2.373139243   | -1.453268646 |
| Fe144 | 4.890115795   | -2.562616778  | -0.518436506 |
| Fe145 | 2.408044863   | -2.301041886  | -1.068130468 |
| H146  | -6.761594734  | -6.695277056  | -0.633766354 |
| H147  | -6.570972503  | -5.807616031  | -1.990347084 |
| H148  | -10.101967077 | -3.757896903  | -0.712048000 |
| H149  | -8.890877016  | -5.274144614  | -2.092655263 |
| H150  | -9.180440356  | -6.343328464  | -0.724274176 |
| H151  | -8.421712929  | -1.825345818  | 0.463893175  |
| H152  | -10.152363514 | -4.478502013  | 2.121251844  |

|      |               |              |               |
|------|---------------|--------------|---------------|
| H153 | -10.193120690 | -1.904229316 | 0.632875016   |
| H154 | -10.113156389 | -5.099473981 | 4.359346845   |
| H155 | -7.663817425  | -5.231460709 | 2.611660475   |
| H156 | -9.779277466  | -3.407311353 | 4.802148904   |
| H157 | -3.460872895  | -2.220774722 | 2.701773298   |
| H158 | -5.981521967  | -3.478033478 | 2.082600798   |
| H159 | -5.543389839  | -6.146366295 | 2.954410431   |
| H160 | -5.853812090  | 0.632934711  | 5.632620399   |
| H161 | -6.774545292  | -1.627064753 | 4.050173111   |
| H162 | -5.721115732  | -5.966565924 | 4.716999228   |
| H163 | -4.846772827  | -1.469639554 | 1.875583282   |
| H164 | -6.515146912  | -2.838848712 | 6.495734317   |
| H165 | -7.383327113  | -0.266476112 | 5.818404748   |
| H166 | -1.240577710  | -3.696062160 | 3.988112966   |
| H167 | -0.727121482  | -2.856661569 | 2.502518936   |
| H168 | 0.485864111   | -3.348031896 | 3.698215085   |
| H169 | -1.713522784  | -1.239255278 | 4.127791377   |
| H170 | -6.368568148  | -3.812326813 | 8.580134887   |
| H171 | -2.237022881  | 2.029904413  | 4.574588601   |
| H172 | -3.365698877  | 0.253060123  | 8.565341655   |
| H173 | -3.021202930  | 3.712534954  | 8.525251933   |
| H174 | 0.018528316   | -0.430514964 | 2.578085484   |
| H175 | 1.309728063   | -0.900084673 | 3.681726169   |
| H176 | 7.997856647   | 1.061980567  | 6.432294339   |
| H177 | -3.045795621  | 3.599168701  | 4.783898034   |
| H178 | -3.473279007  | 4.560248993  | 7.026004356   |
| H179 | -1.307524113  | 3.445099669  | 5.133870490   |
| H180 | -1.760022435  | 4.434609332  | 7.499213682   |
| H181 | -3.580240967  | 2.083668283  | 6.704765521   |
| H182 | -0.546764174  | 2.127095241  | 7.147985903   |
| H183 | -2.318963915  | 0.103970914  | 6.005291218   |
| H184 | 0.197511581   | 0.420559732  | 4.124509859   |
| H185 | 1.639790301   | 4.329940735  | 0.704206444   |
| H186 | 0.701395861   | 5.138700190  | 1.995985188   |
| H187 | 2.799150936   | 5.389276468  | 2.657601110   |
| H188 | 2.701036056   | 4.912111872  | 5.245470830   |
| H189 | 4.854534335   | 3.991437104  | 2.589393851   |
| H190 | 6.337326410   | 2.017159544  | 2.708797126   |
| H191 | 5.006518790   | 1.258629387  | 6.744836784   |
| H192 | -2.435995980  | -2.399874196 | 6.280289547   |
| H193 | -2.339341444  | -5.527356828 | 6.926800500   |
| H194 | -2.111458392  | -4.889748134 | 8.571391143   |
| H195 | -4.119981490  | -3.969163927 | 6.587466557   |
| H196 | -5.818968662  | -2.270244728 | 9.277489673   |
| H197 | 3.489357433   | 3.217593007  | 6.609815927   |
| H198 | 0.515360515   | -2.210310186 | 5.980535877   |
| H199 | -3.320540455  | 1.429425830  | 11.103670090  |
| H200 | -3.682662741  | -0.285307486 | 10.773841279  |
| H201 | -0.932395726  | -0.472108597 | 10.775448031  |
| H202 | 9.557130984   | -7.749588042 | 6.241607476   |
| H203 | -1.407742962  | -5.802026547 | -3.952515947  |
| H204 | -0.071481582  | -8.688779920 | 1.093111455   |
| H205 | -1.363966957  | -6.465595594 | -8.385644538  |
| H206 | 0.236543287   | -5.753582829 | -8.727186575  |
| H207 | -2.203018480  | -4.418304837 | -7.426548981  |
| H208 | -1.323725846  | 0.815557826  | -10.096993230 |
| H209 | -1.952795651  | -4.462501194 | -9.963830215  |
| H210 | -3.038342283  | -1.842731557 | -2.762704995  |
| H211 | -4.052202362  | -4.432882627 | -1.487040291  |
| H212 | -0.867673253  | -1.284605587 | -8.605993050  |
| H213 | -3.566036031  | -0.373091858 | -9.383341844  |

|      |               |              |               |
|------|---------------|--------------|---------------|
| H214 | 0.424724717   | -2.779284006 | -9.493696832  |
| H215 | -1.232271861  | -5.481445491 | -2.230142028  |
| H216 | -0.605339209  | -3.676158342 | -7.334733178  |
| H217 | 0.335579137   | -4.213022575 | -10.298941386 |
| H218 | -6.427682953  | -2.920293155 | -3.668906098  |
| H219 | -3.402956211  | -1.857807661 | -1.034826659  |
| H220 | 1.669481175   | -5.602935900 | -7.141032116  |
| H221 | -2.404261690  | -3.914962120 | -1.147390600  |
| H222 | -3.834030409  | 3.189293362  | 2.268583290   |
| H223 | -2.516325159  | 1.073224978  | 1.000335401   |
| H224 | -8.373032058  | 1.617364754  | 2.346236054   |
| H225 | -7.167226664  | 0.713482508  | -0.233612488  |
| H226 | -6.649419557  | 4.752324928  | 0.839556369   |
| H227 | -8.089141998  | 9.641804663  | 2.227130855   |
| H228 | -7.267227321  | 6.089139729  | 3.642162869   |
| H229 | -8.751745354  | 6.342339981  | 1.283996249   |
| H230 | -5.894534030  | 7.492431916  | 1.272107928   |
| H231 | -9.495374248  | 10.432425327 | -1.689738932  |
| H232 | -2.875505498  | 4.674577617  | 0.523791467   |
| H233 | -4.252047492  | 4.384707948  | -0.540126565  |
| H234 | -8.993841652  | 11.404228963 | 0.618177070   |
| H235 | -7.767822052  | 6.375959044  | -0.179706265  |
| H236 | -5.560070278  | 2.206056365  | 0.265333069   |
| H237 | -7.247312270  | 0.267990012  | 2.197107243   |
| H238 | -9.580172100  | 2.548561161  | -1.964225459  |
| H239 | -1.184535946  | 1.605642495  | -2.985236717  |
| H240 | -10.003018466 | 0.835243699  | -1.784581116  |
| H241 | 9.618550424   | 2.068207826  | 5.007417174   |
| H242 | 8.195033725   | 2.414746125  | 4.279939691   |
| H243 | 2.555702920   | 5.867178629  | -1.109921296  |
| H244 | -0.150511671  | 6.011166524  | 0.000740698   |
| H245 | 2.616059183   | 8.219491980  | 0.086508246   |
| H246 | -2.599506272  | 3.700804454  | -2.347383218  |
| H247 | -3.960264698  | 4.542729716  | -3.896336231  |
| H248 | -3.652531789  | 5.810757682  | -2.994663256  |
| H249 | -4.333616913  | 1.803334442  | -4.815343244  |
| H250 | -6.050199959  | 1.823962168  | -5.316899314  |
| H251 | 1.478786210   | 12.153968894 | -2.545612932  |
| H252 | 0.202581656   | 13.402465410 | -2.572097066  |
| H253 | 0.917657053   | 9.972047356  | -3.203519702  |
| H254 | -0.749135050  | 9.478332385  | -3.400648661  |
| H255 | -0.888829381  | 8.999135575  | -6.837480847  |
| H256 | -0.731401798  | 4.502967215  | -6.281184651  |
| H257 | -6.037541317  | 9.259360218  | -2.100792607  |
| H258 | -2.120497682  | 8.971796625  | 0.955761026   |
| H259 | -2.856337356  | 7.882164498  | -4.137205635  |
| H260 | 2.475961306   | 4.683082961  | -3.554638765  |
| H261 | 3.856740722   | 6.588746373  | -2.894265615  |
| H262 | -0.035325830  | 4.522270967  | -3.683488960  |
| H263 | -7.831847337  | 0.216807448  | -2.535623558  |
| H264 | 5.402804680   | 9.226413913  | -3.957551256  |
| H265 | -5.592251750  | -0.485886259 | -4.027499870  |
| H266 | 2.507671882   | 5.525739586  | -5.108345485  |
| H267 | -2.295570467  | 7.425355485  | -0.956636828  |
| H268 | -6.070980335  | 3.836732351  | -3.892314535  |
| H269 | 4.858620054   | 9.853795530  | -2.388741337  |
| H270 | -0.322854530  | 7.435121191  | -7.313101049  |
| H271 | -2.712395008  | 9.070124386  | -5.380476410  |
| H272 | -4.810538418  | -3.154973237 | -4.016971679  |
| H273 | -5.722481578  | -2.638814297 | -1.509458154  |
| H274 | -5.789624846  | 10.906391285 | -0.263391998  |

|      |              |               |              |
|------|--------------|---------------|--------------|
| H275 | -5.012360561 | 1.926491913   | -2.428752366 |
| H276 | 1.293396507  | 7.466322953   | -4.129604139 |
| H277 | 0.423630096  | 5.828264754   | -6.400851911 |
| H278 | 0.892418113  | 3.670907966   | -4.903472553 |
| H279 | -1.956131151 | 5.816138770   | -4.536635005 |
| H280 | 1.597121229  | 9.504023150   | 2.466906091  |
| H281 | 0.758267700  | 10.289755754  | -0.676229263 |
| H282 | 1.183557913  | 13.164423876  | -0.340908710 |
| H283 | 3.141118407  | 9.787462113   | 1.636080992  |
| H284 | -1.353566514 | 11.123540741  | 0.614637104  |
| H285 | 5.781322577  | -3.659786971  | -8.226845773 |
| H286 | 5.532740519  | -5.119780492  | -7.252012341 |
| H287 | 7.993739454  | -5.969024956  | -3.139381001 |
| H288 | 6.214138117  | -5.755230846  | -9.449566803 |
| H289 | 4.621105011  | -6.123168427  | -9.346177485 |
| H290 | 6.236068376  | 4.484832994   | 0.189381643  |
| H291 | 6.452079451  | 7.356008191   | 1.398252331  |
| H292 | 6.361896929  | 7.386128919   | -2.890169755 |
| H293 | 4.872289207  | 5.538134512   | 0.683022891  |
| H294 | 7.767276411  | 7.735476711   | 0.501565747  |
| H295 | 6.288490364  | 2.457484727   | -5.619028771 |
| H296 | 7.166794831  | 6.244920754   | -1.221526821 |
| H297 | 3.699428508  | -6.807219832  | 6.043961024  |
| H298 | 5.694670238  | -8.200433026  | 4.177526440  |
| H299 | 4.718851226  | 0.835543284   | -6.229825236 |
| H300 | 4.107675734  | -0.091231214  | 3.547338118  |
| H301 | 2.064737108  | 1.126233984   | -8.522590557 |
| H302 | -0.432270184 | -2.338401488  | -4.418803117 |
| H303 | 1.563763124  | 1.705949526   | -6.934961520 |
| H304 | 3.127269885  | -4.309632522  | 5.149579322  |
| H305 | 3.098624979  | -0.332810386  | -6.092366010 |
| H306 | 3.103479281  | -4.949124443  | 3.500928921  |
| H307 | 3.458779074  | -7.219332357  | 4.331180731  |
| H308 | 5.479967573  | -5.716867779  | 3.775524479  |
| H309 | 5.461135474  | -5.164953863  | 5.459830791  |
| H310 | -4.052874579 | -0.805733877  | -7.122237737 |
| H311 | 4.048525993  | -9.335643291  | 6.412027497  |
| H312 | 3.035292057  | -11.798076226 | 4.852530202  |
| H313 | 0.966566040  | -0.336867304  | -4.017314751 |
| H314 | 4.063799025  | -11.591862638 | 7.573644696  |
| H315 | 2.527224767  | -11.811695812 | 7.052358319  |
| H316 | 4.782065920  | -3.389032344  | 2.837504447  |
| H317 | 0.284992041  | 1.854856866   | -4.931069733 |
| H318 | -2.474695507 | -2.172177090  | -5.852846791 |
| H319 | 6.731444304  | -10.573307154 | 0.370054503  |
| H320 | 6.459216654  | -8.493746071  | -2.334978058 |
| H321 | 5.606045084  | -8.698526602  | 1.443757048  |
| H322 | 6.091005383  | -11.256781455 | -0.855844711 |
| H323 | 6.616431713  | 1.721517839   | -8.530207136 |
| H324 | 5.898416390  | -5.573868240  | 0.972352764  |
| H325 | 1.554297240  | -7.426478051  | 1.687624019  |
| H326 | 4.325795372  | -2.530089146  | -6.866505814 |
| H327 | 2.152308848  | -9.280382373  | 0.081431102  |
| H328 | 3.698280775  | -7.378183274  | -6.205607554 |
| H329 | 2.679808271  | -5.746822179  | -4.534519576 |
| H330 | 4.537094313  | -12.494782612 | 5.471631639  |
| H331 | 4.642459668  | -1.218569976  | 2.330550517  |
| H332 | 7.575206599  | -6.483458346  | 2.434179323  |
| H333 | 6.807383009  | -4.330301052  | 1.185575273  |
| H334 | 7.673586346  | -7.380603432  | 4.643891063  |
| H335 | 3.511109435  | -2.477310433  | 6.058247447  |

|       |              |               |              |
|-------|--------------|---------------|--------------|
| H336  | 2.155999791  | -11.989618798 | -2.650190065 |
| H337  | 3.140190552  | -8.580343898  | -2.732642248 |
| H338  | 4.262170694  | -8.864660790  | -1.387077565 |
| H339  | 1.194078945  | -8.672316190  | -1.301837757 |
| H340  | 2.217821149  | -2.455973817  | -5.713777122 |
| H341  | -1.771256137 | 2.049659441   | -6.363485477 |
| H342  | -3.848068585 | 0.959472589   | -7.280096202 |
| H343  | 1.554701420  | -5.741708169  | 1.065008404  |
| H344  | 7.484701509  | -8.036473680  | 2.424628839  |
| H345  | 6.051993566  | -9.777228519  | 2.467851583  |
| H346  | 3.107469996  | -0.883570717  | 5.552386615  |
| H347  | 5.904809153  | -8.377006028  | -5.344425872 |
| H348  | 6.238033297  | -6.902531147  | -1.598736852 |
| H349  | 1.460638400  | -3.274551655  | -7.118845897 |
| H350  | 5.517080240  | 3.635070212   | -6.712500778 |
| H351  | 6.320300026  | -0.450142991  | 5.482269311  |
| H352  | 6.884817695  | -0.117784644  | 3.825769255  |
| H353  | 9.341062354  | -7.440381987  | -4.364500786 |
| H354  | 8.524286034  | -8.769543829  | -3.872052654 |
| H355  | 9.554932479  | -9.607567307  | 0.504034256  |
| H356  | 8.031616155  | -9.013793447  | -1.087934557 |
| H357  | 11.356052441 | -8.807587096  | -1.391566613 |
| H358  | 9.571242532  | -7.887123284  | 0.951249569  |
| H359  | 9.438384307  | -0.872195839  | 4.507206773  |
| H360  | -2.018416874 | 13.581296731  | 2.589538297  |
| H361  | 8.409275619  | -7.393248386  | 7.562594834  |
| H362  | 8.259334126  | -4.956316145  | 6.316264794  |
| H363  | -3.616545250 | 12.810398295  | 0.120907357  |
| H364  | -3.143575287 | 10.757123357  | 2.367839019  |
| H365  | -4.705891548 | 11.472283512  | 1.928867154  |
| H366  | -5.108432738 | 7.473969733   | -3.157246659 |
| H367  | 2.354828472  | -1.144443004  | 0.173540065  |
| H368  | -0.989615043 | 0.125127787   | -0.951813235 |
| Mo369 | 3.720829012  | -4.711868995  | -1.569947579 |
| N370  | -7.234337375 | -6.408332445  | -1.494871384 |
| N371  | -9.328511090 | -3.663499251  | -0.058033639 |
| N372  | -9.636522649 | -3.868951557  | 2.751020295  |
| N373  | -7.291413742 | -5.190331118  | 3.559226704  |
| N374  | -5.282701088 | -3.282992548  | 2.801270290  |
| N375  | -6.010404282 | -1.150765244  | 4.534534072  |
| N376  | -5.973936059 | -2.316887815  | 7.190066821  |
| N377  | -3.627221617 | -3.970376618  | 7.485596818  |
| N378  | -1.449393518 | -2.608440384  | 6.416574953  |
| N379  | -1.508820660 | 0.377315418   | 6.564604771  |
| N380  | -2.688635254 | 0.657352202   | 9.216159824  |
| N381  | 3.387684073  | -11.294713243 | 6.867017273  |
| N382  | 4.581519521  | -9.289105013  | 5.537312185  |
| N383  | 4.358260716  | -3.302703453  | 3.767081708  |
| N384  | 3.364007778  | -1.830367442  | 5.290463971  |
| N385  | 4.143934948  | -1.058479202  | 3.234181444  |
| N386  | 7.546507070  | -7.417296890  | 5.679798968  |
| N387  | -5.505986194 | -2.479469728  | -3.648493800 |
| N388  | -1.743133541 | -5.338465540  | -3.103201306 |
| N389  | -5.633878218 | 0.100556559   | -3.177498294 |
| N390  | -8.031066480 | 1.200135122   | -2.366661907 |
| N391  | -7.831245745 | 1.180776349   | 0.393982494  |
| N392  | -5.563668405 | 2.700314121   | 1.156877877  |
| N393  | -2.408131522 | 2.887757191   | -1.722858017 |
| N394  | -1.677519315 | 0.977187014   | -0.988922372 |
| N395  | -6.128472680 | 5.401542516   | 1.424675867  |
| N396  | -8.815974630 | 8.568700855   | -0.841820310 |

|      |              |               |               |
|------|--------------|---------------|---------------|
| N397 | -8.859135770 | 10.427943150  | 0.368415728   |
| N398 | 8.828883525  | 1.645177289   | 4.514049566   |
| N399 | 7.136482581  | 6.965062812   | 0.742373249   |
| N400 | 5.706046523  | 7.941192708   | -2.346966686  |
| N401 | 3.159882745  | 7.253882172   | -3.271375811  |
| N402 | -1.282924113 | 6.208630328   | -5.222255293  |
| N403 | -0.749481782 | 8.021465518   | -6.604154281  |
| N404 | -2.301036847 | 8.273617566   | -4.901106745  |
| N405 | 1.616501150  | 6.315863099   | -1.053215010  |
| N406 | 1.802435618  | 8.568327976   | 0.603086719   |
| N407 | 0.831611600  | 11.136024920  | -0.109504910  |
| N408 | -0.082104191 | 10.182102392  | -3.086867785  |
| N409 | -1.685253503 | 12.080664244  | 0.525051686   |
| N410 | 5.280634748  | -5.341065108  | -9.397762662  |
| N411 | 3.521771862  | -3.047495164  | -7.239485255  |
| N412 | 2.550408953  | -0.154473859  | -6.962523707  |
| N413 | 4.707788431  | 1.708417927   | -6.776243157  |
| N414 | -0.190700788 | -3.366928177  | -10.070299039 |
| N415 | -1.862257436 | -1.356368104  | -8.849730707  |
| N416 | 8.409821351  | -7.777411794  | -4.103746899  |
| N417 | 4.395391932  | -6.218707332  | -3.328271613  |
| N418 | 4.126588375  | -7.140911063  | -5.315469133  |
| N419 | 8.814952201  | -8.369214412  | -0.984212183  |
| N420 | 0.595476067  | 1.743161131   | 0.867206828   |
| N421 | 1.288954605  | 1.138887765   | 0.200899232   |
| O422 | -7.243325737 | -4.366814359  | 0.527357680   |
| O423 | -8.443522628 | -1.939984112  | 2.974013936   |
| O424 | -7.594883356 | -4.359338609  | 5.667575231   |
| O425 | -4.091504927 | -4.055191344  | 4.578539034   |
| O426 | -3.827854359 | -0.502843200  | 4.513068724   |
| O427 | -5.175590987 | -0.287637614  | 7.874552515   |
| O428 | -3.749397277 | -3.606239704  | 9.747786892   |
| O429 | 0.018317249  | -4.200144093  | 7.191682681   |
| O430 | 0.666633974  | -0.042777098  | 7.122521980   |
| O431 | -0.953583646 | 2.070265033   | 9.595243828   |
| O432 | -1.534426931 | 0.241058781   | 12.591104585  |
| O433 | 5.310301254  | -10.665313538 | 3.825594008   |
| O434 | 6.097256518  | -7.801284511  | 7.422016161   |
| O435 | 10.224566707 | -5.287768823  | 6.753527619   |
| O436 | -5.478868461 | -0.101333619  | -0.898266212  |
| O437 | -3.362529969 | -4.251532904  | -4.275646658  |
| O438 | -7.236262880 | 3.331378805   | -2.602427373  |
| O439 | -5.305022158 | 3.585490047   | -4.472392378  |
| O440 | -9.859509275 | 2.245847919   | 0.599370067   |
| O441 | -6.181404514 | 2.549363010   | 3.350374009   |
| O442 | -4.288817476 | 5.662390001   | 2.754887862   |
| O443 | -6.803942121 | 8.076023252   | 3.649319890   |
| O444 | 9.052765836  | -1.277518609  | 6.470313720   |
| O445 | 3.279220364  | 4.841773853   | 4.463682401   |
| O446 | 4.682757742  | 8.235744485   | -0.331966761  |
| O447 | 2.664321247  | 9.465170937   | -3.668502772  |
| O448 | -0.228519430 | 7.007118316   | -2.225231427  |
| O449 | -0.097369892 | 7.916757972   | 1.706876264   |
| O450 | 2.671769065  | 5.809988932   | 1.782761630   |
| O451 | 1.804628823  | 12.067839587  | 1.738656485   |
| O452 | -1.232285095 | 14.145293177  | -0.329093690  |
| O453 | -1.765808581 | 11.712334891  | -2.874169161  |
| O454 | -3.944086343 | 14.206467439  | 2.312985549   |
| O455 | -4.245185817 | 7.360890050   | -2.714642719  |
| O456 | 2.805064536  | -5.013514987  | -8.190319501  |
| O457 | 1.098809527  | -1.132056195  | -8.442988325  |

|  |                            |              |               |              |
|--|----------------------------|--------------|---------------|--------------|
|  | O458                       | 3.488825789  | 3.242167211   | -7.953443220 |
|  | O459                       | 8.044278591  | 2.844065309   | -7.597826083 |
|  | O460                       | -3.594062424 | -2.685926882  | -9.516669783 |
|  | O461                       | -0.892320246 | -6.681107562  | -5.808396621 |
|  | O462                       | 1.160982258  | -6.022885610  | -6.376807907 |
|  | O463                       | -2.305728493 | 2.186434690   | -8.954682183 |
|  | O464                       | 9.882325003  | -6.453901177  | -1.554320022 |
|  | O465                       | 12.110017114 | -8.282916062  | 0.431237313  |
|  | O466                       | -0.687997135 | -6.056134166  | -0.259312877 |
|  | O467                       | -0.687082066 | -8.105778334  | 0.609381933  |
|  | O468                       | 4.172400996  | -11.358781683 | -1.789129496 |
|  | O469                       | 2.069153398  | -11.019239973 | -2.537150785 |
|  | O470                       | 4.651473486  | -6.273732826  | -0.177670937 |
|  | O471                       | 4.099618860  | -7.917674987  | 1.263645536  |
|  | O472                       | 2.303993705  | -6.272296555  | -1.374902797 |
|  | O473                       | 7.959212076  | -7.286336793  | 2.872114718  |
|  | O474                       | 6.554885959  | -5.179182661  | 1.602129904  |
|  | O475                       | -3.225321697 | 5.053916862   | -3.459392452 |
|  | O476                       | 6.939318118  | -11.199304644 | -0.370040084 |
|  | O477                       | 6.391122855  | -9.275588323  | 1.682776375  |
|  | S478                       | 4.560400156  | 4.709127077   | -1.569519925 |
|  | S479                       | 2.607588554  | 1.644683911   | -2.679940425 |
|  | S480                       | 2.243621175  | -3.539398972  | -2.987936625 |
|  | S481                       | 4.026445245  | 1.398701939   | 0.614310861  |
|  | S482                       | 0.573326630  | -1.084301916  | -1.547772224 |
|  | S483                       | 4.716136428  | -1.100117771  | -4.780200733 |
|  | S484                       | 3.191873619  | -3.676149325  | 0.510307153  |
|  | S485                       | 6.184125987  | 1.238982051   | -2.217495378 |
|  | S486                       | 5.831146787  | -3.741837275  | -2.151631406 |
|  | S487                       | 6.304575762  | -1.532736395  | 0.827751201  |
|  | <b>10</b>                  |              |               |              |
|  | Fe( 139)                   | 0.565        | 2.479         |              |
|  | Fe( 140)                   | 0.327        | 0.305         |              |
|  | Fe( 141)                   | 0.553        | 2.504         |              |
|  | Fe( 142)                   | 0.560        | -2.691        |              |
|  | Fe( 143)                   | 0.604        | 3.142         |              |
|  | Fe( 144)                   | 0.503        | -2.306        |              |
|  | Fe( 145)                   | 0.367        | 0.312         |              |
|  | <b>S=2</b>                 |              |               |              |
|  | bm12cnx2b262n2x47d2b.car_3 |              |               |              |
|  | C1                         | -7.770257661 | -4.628753362  | -2.694868843 |
|  | C2                         | -7.751932734 | -5.308091380  | -4.069373478 |
|  | C3                         | -9.011307482 | -3.150172254  | -1.170322813 |
|  | C4                         | -8.912443028 | -3.961812352  | 0.119065072  |
|  | C5                         | -9.301663401 | -6.082456616  | 1.260460606  |
|  | C6                         | -7.860018087 | -6.452488803  | 1.626603057  |
|  | C7                         | -5.581968132 | -6.823863331  | 0.808842417  |
|  | C8                         | -4.840184601 | -5.608062111  | 1.374851728  |
|  | C9                         | -4.530867845 | -3.188384584  | 1.328206313  |
|  | C10                        | -4.910551902 | -2.886646890  | 2.786366598  |
|  | C11                        | -6.629887728 | -2.885933408  | 4.501444183  |
|  | C12                        | -6.128035869 | -3.923852331  | 5.514615922  |
|  | C13                        | -5.975393466 | -6.298757108  | 6.091233224  |
|  | C14                        | -4.526056591 | -6.788545062  | 6.191565630  |
|  | C15                        | -2.424171199 | -7.232249347  | 4.995151600  |
|  | C16                        | -1.285348406 | -6.209068883  | 4.951964628  |
|  | C17                        | -0.717241328 | -3.809018063  | 4.675127447  |
|  | C18                        | -0.821810190 | -2.847363962  | 5.873885024  |
|  | C19                        | -0.853885475 | -3.117888169  | 3.294761579  |
|  | C20                        | 0.020455369  | -1.865027891  | 3.191059405  |
|  | C21                        | -0.532987764 | -4.101282754  | 2.162866973  |
|  | C22                        | -2.224859266 | -1.291819970  | 7.171526984  |
|  | C23                        | -2.479694312 | -2.047127773  | 8.491360770  |
|  | C24                        | -3.340793247 | -0.267648295  | 6.851405759  |
|  | C25                        | -3.653880100 | 0.611356759   | 8.068345362  |
|  | C26                        | -2.955047022 | 0.600232338   | 5.647206653  |
|  | C27                        | -3.746853231 | -3.724374623  | 9.701461325  |
|  | C28                        | -2.525851069 | -4.343770761  | 10.352332519 |
|  | C29                        | 4.579726199  | -12.568665472 | 1.232391878  |



|     |              |               |              |
|-----|--------------|---------------|--------------|
| C30 | 5.294211678  | -11.219675258 | 1.132618165  |
| C31 | 5.585444784  | -9.042124109  | 2.323790310  |
| C32 | 6.559314910  | -9.087328372  | 3.517809377  |
| C33 | 4.463826895  | -8.010752239  | 2.547429677  |
| C34 | 4.974928301  | -6.578941002  | 2.728672485  |
| C35 | 3.828901222  | -5.570529406  | 2.653427647  |
| C36 | 3.804657205  | -3.186927610  | 3.420372347  |
| C37 | 8.804068700  | -8.511831389  | 4.311714105  |
| C38 | 9.102533219  | -7.134226759  | 4.860706929  |
| C39 | -4.753091641 | -1.365746647  | -3.435306473 |
| C40 | -5.211179000 | -0.129371498  | -2.645320858 |
| C41 | -3.263824275 | -1.606386320  | -3.099617670 |
| C42 | -2.694421122 | -2.987702427  | -3.486020475 |
| C43 | -2.115241889 | -3.091276805  | -4.894595038 |
| C44 | -5.516344276 | 2.325299339   | -2.806225645 |
| C45 | -6.895674950 | 2.508861746   | -2.163604426 |
| C46 | -5.185767271 | 3.388604172   | -3.891653121 |
| C47 | -9.141182028 | 1.566478701   | -1.877205820 |
| C48 | -9.064953791 | 1.088064524   | -0.418214230 |
| C49 | -7.701631132 | 0.007756626   | 1.319397817  |
| C50 | -6.691320492 | 0.805508922   | 2.149875220  |
| C51 | -4.924072911 | 2.506019995   | 2.234876120  |
| C52 | -5.619007412 | 3.511606958   | 3.177428896  |
| C53 | -4.047878260 | 3.347592743   | 1.293891241  |
| C54 | -3.166004890 | 2.617599644   | 0.327806846  |
| C55 | -2.643020067 | 1.342010105   | 0.351586294  |
| C56 | -1.865120148 | 2.433326275   | -1.406630724 |
| C57 | -7.369868630 | 5.238868744   | 3.268672019  |
| C58 | -7.760184074 | 4.899096536   | 4.704530188  |
| C59 | -8.621483430 | 5.591327790   | 2.429749715  |
| C60 | -9.152698256 | 6.986719106   | 2.578421757  |
| C61 | -9.365288857 | 7.759310710   | 3.705458396  |
| C62 | -9.959735273 | 8.872430189   | 1.883020048  |
| C63 | 7.599831369  | -0.855803040  | 6.077111744  |
| C64 | 8.515268796  | -2.020970464  | 5.753103092  |
| C65 | 6.285399465  | -1.086567335  | 5.287324474  |
| C66 | 5.245645983  | -0.023433942  | 5.554835067  |
| C67 | 4.314083871  | -0.157043033  | 6.601443535  |
| C68 | 5.182890988  | 1.135923044   | 4.763151137  |
| C69 | 3.349703640  | 0.826059168   | 6.845779803  |
| C70 | 4.234440232  | 2.130075862   | 5.002125870  |
| C71 | 3.314756925  | 1.971591273   | 6.041888168  |
| C72 | 5.758501776  | 6.631991402   | 2.662408528  |
| C73 | 4.803979114  | 7.816521051   | 2.456836763  |
| C74 | 5.014963166  | 5.313179156   | 2.415286363  |
| C75 | 4.223777229  | 9.745131920   | 1.045643605  |
| C76 | 2.847838107  | 9.422613332   | 0.454245463  |
| C77 | 1.401657073  | 7.687561717   | -0.549212520 |
| C78 | 0.481453395  | 7.118898347   | 0.553993036  |
| C79 | 1.681642114  | 6.681231318   | -1.678732710 |
| C80 | 0.475916883  | 6.072626611   | -2.404259550 |
| C81 | -0.342202556 | 7.015230445   | -3.303809085 |
| C82 | -1.798752987 | 8.883979285   | -2.531761594 |
| C83 | 0.247639037  | 5.807027648   | 2.596389519  |
| C84 | -0.017362863 | 6.805188271   | 3.738158271  |
| C85 | 0.845510853  | 4.529960597   | 3.201748097  |
| C86 | 0.972937642  | 8.529673097   | 5.160778422  |
| C87 | 0.380857182  | 9.934889152   | 5.217798568  |
| C88 | -0.743985919 | 11.762258267  | 4.018238266  |
| C89 | -2.172796488 | 11.966640782  | 4.568188028  |
| C90 | -0.617915911 | 12.318761495  | 2.584000220  |

|       |              |              |               |
|-------|--------------|--------------|---------------|
| C91   | -1.502751444 | 11.562251096 | 1.599064950   |
| C92   | -4.303953368 | 10.903815956 | 5.152340185   |
| C93   | -4.475160682 | 11.501106787 | 6.542608030   |
| C94   | -4.933148661 | 9.483651691  | 5.107384871   |
| C95   | -4.918799667 | 8.896822631  | 3.714659836   |
| C96   | -5.943565586 | 9.199922746  | 2.803817453   |
| C97   | -3.858248850 | 8.086853598  | 3.274662111   |
| C98   | -5.909007149 | 8.727432286  | 1.489298729   |
| C99   | -3.794370088 | 7.625201872  | 1.957035704   |
| C100  | -4.822660828 | 7.954971303  | 1.074763556   |
| C101  | 6.189216326  | -0.819980628 | -8.688413064  |
| C102  | 4.692375676  | -0.689870263 | -8.456866417  |
| C103  | 2.950913869  | 0.353592586  | -7.021561745  |
| C104  | 2.550428243  | 1.826653112  | -7.175871891  |
| C105  | 2.786146943  | 4.071678370  | -6.223617419  |
| C106  | 3.874810011  | 4.996198606  | -5.687349427  |
| C107  | 6.012230163  | 5.268986923  | -4.519687311  |
| C108  | 7.195849839  | 5.524290432  | -5.431117467  |
| C109  | -0.377766030 | 0.012083116  | -10.168250544 |
| C110  | -1.466046833 | 1.006670220  | -9.744864513  |
| C111  | -0.234757704 | -1.081298680 | -9.086351342  |
| C112  | 0.553186034  | -2.296528591 | -9.610347498  |
| C113  | 0.951541694  | -3.203451046 | -8.467566378  |
| C114  | -2.062053027 | 2.945981860  | -8.379703400  |
| C115  | -1.484355774 | 4.346065659  | -8.408704160  |
| C116  | -2.754778748 | 2.548082373  | -7.055043334  |
| C117  | -1.742366121 | 2.157076684  | -6.016668848  |
| C118  | -1.074285582 | 3.135113108  | -5.262704672  |
| C119  | -1.340636980 | 0.814160375  | -5.902259997  |
| C120  | 0.021720964  | 2.781032439  | -4.472774544  |
| C121  | -0.245997919 | 0.465214453  | -5.110387305  |
| C122  | 0.460922143  | 1.457027786  | -4.424720079  |
| C123  | 8.802659045  | -4.912307890 | -4.472113547  |
| C124  | 9.700229672  | -5.472331229 | -3.354238284  |
| C125  | 7.379128674  | -5.491987355 | -4.434172436  |
| C126  | 6.388288856  | -4.867724588 | -5.371567515  |
| C127  | 6.368413514  | -4.951041691 | -6.749592041  |
| C128  | 4.549396872  | -3.899784928 | -6.048781550  |
| C129  | 10.488683998 | -7.375177813 | -2.055095969  |
| C130  | 11.945479818 | -7.029906903 | -2.269339798  |
| C131  | 0.617643783  | -6.521162868 | -2.262177976  |
| C132  | 1.985790102  | -6.464965133 | -1.634830153  |
| C133  | 3.137911459  | -6.316083591 | -2.704287492  |
| C134  | 3.089239755  | -7.515484815 | -3.697609999  |
| C135  | 4.290347440  | -7.541495648 | -4.659837111  |
| C136  | 4.412173408  | -8.818384087 | -5.441869226  |
| C137  | 4.483484812  | -6.434862043 | -1.928569865  |
| C138  | 4.118200235  | -0.217880701 | -1.463458509  |
| Fe139 | 4.644405018  | -0.822122800 | -3.255757279  |
| Fe140 | 2.516835911  | 0.681011980  | -0.323892736  |
| Fe141 | 5.236444926  | 0.525804490  | 0.015140825   |
| Fe142 | 4.457632777  | 1.575887238  | -2.226834878  |
| Fe143 | 4.200260464  | 3.060553434  | -0.011658555  |
| Fe144 | 5.257848207  | -1.815448708 | -0.941987596  |
| Fe145 | 2.726991468  | -1.540857079 | -1.615155967  |
| H146  | -6.016995411 | -6.340560203 | -3.790729981  |
| H147  | -5.830480043 | -4.992459934 | -4.690386967  |
| H148  | -9.594468611 | -3.789742725 | -3.122532766  |
| H149  | -8.178986061 | -4.623366615 | -4.818467104  |
| H150  | -8.449000908 | -6.162576114 | -4.007302388  |
| H151  | -8.222060779 | -2.386930283 | -1.118429033  |

|      |              |              |               |
|------|--------------|--------------|---------------|
| H152 | -9.821252330 | -5.577943426 | -0.767863955  |
| H153 | -9.982806858 | -2.637166977 | -1.180363995  |
| H154 | -9.862479897 | -7.006426157 | 1.067242387   |
| H155 | -7.290808864 | -6.273746141 | -0.337939021  |
| H156 | -9.738533791 | -5.592728927 | 2.140321101   |
| H157 | -3.435202141 | -3.250821459 | 1.292827487   |
| H158 | -5.754983569 | -4.364756234 | 0.003072061   |
| H159 | -5.124266800 | -7.119386154 | -0.145492907  |
| H160 | -6.271572262 | -1.904397017 | 4.834678252   |
| H161 | -6.878633796 | -3.426386097 | 2.433096405   |
| H162 | -5.445989009 | -7.643198122 | 1.525559785   |
| H163 | -4.846315513 | -2.351773620 | 0.687540335   |
| H164 | -6.681552974 | -5.473209493 | 4.254240985   |
| H165 | -7.728107396 | -2.881134362 | 4.519076953   |
| H166 | -1.179520380 | -4.989820450 | 2.199094180   |
| H167 | -0.679959144 | -3.615233462 | 1.186100939   |
| H168 | 0.517220098  | -4.429482142 | 2.211643573   |
| H169 | -1.906514076 | -2.807626723 | 3.190060861   |
| H170 | -6.593538395 | -7.163546316 | 5.808868620   |
| H171 | -2.769159650 | 0.001065662  | 4.744971445   |
| H172 | -4.002354819 | -3.195999383 | 7.648778621   |
| H173 | -4.002531689 | 0.022388684  | 8.929248973   |
| H174 | -0.157309033 | -1.361623399 | 2.231660104   |
| H175 | 1.089641902  | -2.118042729 | 3.222833181   |
| H176 | 7.360602600  | -0.909645727 | 7.156077232   |
| H177 | -3.765697977 | 1.308736329  | 5.421196822   |
| H178 | -4.441250786 | 1.335108217  | 7.812165460   |
| H179 | -2.046351305 | 1.183731205  | 5.868220820   |
| H180 | -2.762264014 | 1.176415688  | 8.383056722   |
| H181 | -4.252839395 | -0.837148268 | 6.595801749   |
| H182 | -1.280528785 | -0.753348807 | 7.339850916   |
| H183 | -2.754084204 | -2.306359297 | 5.349856301   |
| H184 | -0.187816394 | -1.139532460 | 3.991320176   |
| H185 | 1.155671267  | 3.857453509  | 2.383708398   |
| H186 | 0.048997155  | 4.037518610  | 3.780185249   |
| H187 | 2.023349408  | 4.174382476  | 4.736469118   |
| H188 | 1.765275753  | 2.728896919  | 6.933746542   |
| H189 | 4.177814830  | 3.005558979  | 4.353911284   |
| H190 | 5.860452544  | 1.249585580  | 3.914069047   |
| H191 | 4.335760672  | -1.046492163 | 7.238492971   |
| H192 | -2.655003871 | -4.723887114 | 4.700932233   |
| H193 | -2.319765321 | -7.864179486 | 4.100157935   |
| H194 | -2.259614009 | -7.865343564 | 5.876329687   |
| H195 | -4.195356482 | -6.380891823 | 4.180872172   |
| H196 | -6.265722242 | -5.983213635 | 7.101487517   |
| H197 | 2.625198073  | 0.697629805  | 7.654786273   |
| H198 | 0.281069909  | -4.258179309 | 4.759571475   |
| H199 | -4.248270179 | -3.073756942 | 10.436717781  |
| H200 | -4.436204185 | -4.546865326 | 9.452127345   |
| H201 | -1.688637593 | -4.577570250 | 9.653403970   |
| H202 | 9.734857777  | -8.965770687 | 3.938419590   |
| H203 | -0.571928011 | -3.941713916 | -5.943012168  |
| H204 | 0.759215669  | -8.445386121 | -2.222174379  |
| H205 | -0.078575874 | -2.869281056 | -10.304752441 |
| H206 | 1.447976522  | -1.961293398 | -10.155107697 |
| H207 | -1.228904865 | -1.417968950 | -8.754069544  |
| H208 | -0.698442324 | 4.499676206  | -9.185440289  |
| H209 | -0.795303573 | -0.462198212 | -11.069527558 |
| H210 | -2.665646393 | -0.807683027 | -3.566085287  |
| H211 | -3.481421171 | -3.757838087 | -3.402133067  |
| H212 | -0.128457117 | 2.027800905  | -8.530358586  |

|      |               |              |               |
|------|---------------|--------------|---------------|
| H213 | -2.853797810  | 2.976573411  | -9.158422574  |
| H214 | 1.367170014   | 1.063073104  | -9.761458856  |
| H215 | -0.545595989  | -4.273640015 | -4.214711056  |
| H216 | 0.255982829   | -0.644255869 | -8.203394045  |
| H217 | 1.475650156   | 0.042938422  | -11.049637906 |
| H218 | -5.864952646  | -1.571747468 | -5.160633682  |
| H219 | -3.154858588  | -1.492997175 | -2.011890854  |
| H220 | 2.730487746   | -2.361897815 | -8.507175944  |
| H221 | -1.920160791  | -3.268219992 | -2.757951121  |
| H222 | -4.308238809  | 1.856392457  | 2.874023919   |
| H223 | -2.769331807  | 0.517576920  | 1.045714476   |
| H224 | -8.659991944  | 0.062827791  | 1.852248041   |
| H225 | -7.164349241  | 0.301766527  | -0.724247755  |
| H226 | -7.076075258  | 3.749555155  | 1.755097513   |
| H227 | -9.176753741  | 7.582848373  | 4.758313892   |
| H228 | -8.060921500  | 3.833509619  | 4.850263387   |
| H229 | -9.410109149  | 4.843878835  | 2.626547398   |
| H230 | -6.676390441  | 6.095281302  | 3.288389028   |
| H231 | -10.332241917 | 9.688198665  | 1.267831178   |
| H232 | -3.421286112  | 3.984334070  | 1.941329319   |
| H233 | -4.696663968  | 4.031993040  | 0.724921346   |
| H234 | -10.129282273 | 9.755574394  | 3.813280684   |
| H235 | -8.349497677  | 5.476624202  | 1.368556327   |
| H236 | -5.896956730  | 1.734405235  | 0.481651901   |
| H237 | -7.388534066  | -1.046774554 | 1.332647854   |
| H238 | -9.642648793  | 2.543891963  | -1.856735524  |
| H239 | -1.308855021  | 2.623214402  | -2.319178590  |
| H240 | -9.788828321  | 0.870210249  | -2.427169993  |
| H241 | 8.971475370   | 0.643915350  | 6.339659683   |
| H242 | 7.562046820   | 1.152220084  | 5.686694080   |
| H243 | 2.036924672   | 6.012512062  | 1.390275849   |
| H244 | -0.736775506  | 5.553544812  | 2.176866498   |
| H245 | 1.767978337   | 7.746337561  | 3.369699645   |
| H246 | -3.125712866  | 4.847336909  | -1.335782703  |
| H247 | -4.642303179  | 4.985752203  | -2.832506192  |
| H248 | -3.969505730  | 6.165970757  | -1.006554592  |
| H249 | -4.150741921  | 3.181400972  | -4.221113345  |
| H250 | -5.853038357  | 3.230794605  | -4.754621163  |
| H251 | 0.441439722   | 12.286368865 | 2.290467994   |
| H252 | -0.943472154  | 13.367124514 | 2.602719868   |
| H253 | 0.144974869   | 10.514201358 | 0.798850055   |
| H254 | -1.446562226  | 10.016498579 | 0.261860914   |
| H255 | -1.357711218  | 10.795442697 | -3.100711880  |
| H256 | -0.707394898  | 6.466314654  | -4.184226085  |
| H257 | -6.724864064  | 8.953204124  | 0.797970871   |
| H258 | -3.063750324  | 7.784083376  | 3.962609432   |
| H259 | -3.340491149  | 8.611432014  | -1.191519485  |
| H260 | 2.273894282   | 5.846044690  | -1.271428247  |
| H261 | 3.409680324   | 7.467399100  | 0.144333482   |
| H262 | -0.191213316  | 5.556048302  | -1.696850682  |
| H263 | -7.633144804  | 0.948945258  | -3.269662272  |
| H264 | 4.757142468   | 10.374717431 | 0.319942201   |
| H265 | -5.114405690  | 0.847177016  | -4.381374802  |
| H266 | 2.323411706   | 7.190461863  | -2.417343193  |
| H267 | -2.939502585  | 7.039820149  | 1.613915984   |
| H268 | 4.041391127   | 10.349110233 | 1.945192955   |
| H269 | -0.603382382  | 9.576454898  | -4.051078689  |
| H270 | -3.228187817  | 10.187418216 | -1.884009858  |
| H271 | -4.214750498  | -1.661328043 | -5.398073537  |
| H272 | -5.333664723  | -2.209998775 | -3.015989907  |
| H273 | -6.789417622  | 9.812340629  | 3.127069139   |

|      |              |               |               |
|------|--------------|---------------|---------------|
| H274 | -4.804609189 | 2.459159171   | -1.976769485  |
| H275 | 0.864604074  | 8.560817002   | -0.941432446  |
| H276 | 0.301729519  | 7.822893554   | -3.673814931  |
| H277 | 0.888999702  | 5.288725483   | -3.052428921  |
| H278 | -2.180874423 | 6.909778407   | -2.205331458  |
| H279 | 0.467100782  | 7.942587547   | 5.942074574   |
| H280 | -0.226439855 | 9.805405866   | 3.262071425   |
| H281 | -0.102622255 | 12.368458833  | 4.675127919   |
| H282 | 2.030549965  | 8.626115286   | 5.444303639   |
| H283 | -2.489331098 | 9.952140164   | 4.519011631   |
| H284 | 6.698591168  | 0.098729887   | -8.362581388  |
| H285 | 6.527613549  | -1.632870909  | -8.013129026  |
| H286 | 8.749519994  | -3.830077741  | -4.285224071  |
| H287 | 7.431952102  | -1.383847176  | -10.202820701 |
| H288 | 5.871631228  | -1.832598264  | -10.423735151 |
| H289 | 5.730167753  | 4.485928879   | 2.511085384   |
| H290 | 5.562727578  | 6.677072287   | 4.692381536   |
| H291 | 5.807814957  | 8.343204356   | 0.742178324   |
| H292 | 4.217932234  | 5.193576900   | 3.162304906   |
| H293 | 6.896295100  | 7.456922510   | 4.156311747   |
| H294 | 6.361707975  | 4.806147509   | -3.583834080  |
| H295 | 6.590216355  | 6.708158842   | 1.943925046   |
| H296 | 3.862171546  | -8.319969247  | 3.418650091   |
| H297 | 6.129400901  | -8.786101508  | 1.406894749   |
| H298 | 5.061230374  | 3.429288331   | -4.991775650  |
| H299 | 3.809605485  | -1.152667887  | 3.668320970   |
| H300 | 2.563635379  | 4.385976941   | -7.251510724  |
| H301 | 0.060433231  | -0.579034852  | -5.009550696  |
| H302 | 1.881142317  | 4.282987055   | -5.630035015  |
| H303 | 3.115110270  | -5.723072630  | 3.473343232   |
| H304 | 3.536670389  | 2.189435884   | -5.432269997  |
| H305 | 3.269583139  | -5.713635603  | 1.713434071   |
| H306 | 3.807925409  | -8.059245414  | 1.662671935   |
| H307 | 5.697067214  | -6.334760342  | 1.935128968   |
| H308 | 5.496459798  | -6.466065624  | 3.692572366   |
| H309 | -3.435010257 | 1.710358363   | -7.268705406  |
| H310 | 4.426202080  | -10.769758051 | 2.875753640   |
| H311 | 3.796453550  | -12.554764192 | 0.458486775   |
| H312 | 1.308207060  | 1.182012055   | -3.797226474  |
| H313 | 4.608744776  | -13.293515568 | 3.161059250   |
| H314 | 3.141534849  | -13.412857816 | 2.439570935   |
| H315 | 4.799722024  | -3.887626633  | 1.823740099   |
| H316 | 0.544602396  | 3.527647393   | -3.872889100  |
| H317 | -1.887359742 | 0.037638606   | -6.442535435  |
| H318 | 7.679918199  | -9.504119597  | -2.862070403  |
| H319 | 7.431408129  | -6.570441507  | -4.668632371  |
| H320 | 6.313482840  | -8.235441486  | -1.282767462  |
| H321 | 7.191687007  | -9.732114105  | -4.307879499  |
| H322 | 7.035545448  | 5.248391197   | -6.502064869  |
| H323 | 6.344155077  | -5.149878788  | -0.554830565  |
| H324 | 2.175523213  | -7.353316353  | -1.013319754  |
| H325 | 5.048117881  | 0.534518037   | -6.852831789  |
| H326 | 3.076411586  | -8.447949036  | -3.111473883  |
| H327 | 4.869791850  | -4.248148931  | -8.110602719  |
| H328 | 3.587556828  | -3.402350449  | -6.080014658  |
| H329 | 5.312143398  | -13.333816439 | 0.923109183   |
| H330 | 4.479764023  | -1.691379571  | 2.161243728   |
| H331 | 7.977322966  | -6.430529741  | 0.644445827   |
| H332 | 7.126111446  | -4.037829593  | 0.197915221   |
| H333 | 7.981255698  | -8.087203534  | 2.366762995   |
| H334 | 3.265267886  | -4.347922450  | 5.031938401   |

|       |              |               |              |
|-------|--------------|---------------|--------------|
| H335  | 3.494849812  | -9.919715245  | -6.674582596 |
| H336  | 4.194581608  | -6.704418916  | -5.367279091 |
| H337  | 5.232146781  | -7.416891762  | -4.114834018 |
| H338  | 2.158733020  | -7.455732591  | -4.279073037 |
| H339  | 2.851001618  | 0.029746139   | -5.973873370 |
| H340  | -1.401390649 | 4.175592922   | -5.323032891 |
| H341  | -3.361971505 | 3.407563884   | -6.732041885 |
| H342  | 2.030268790  | -5.565550486  | -1.006343251 |
| H343  | 8.035762832  | -7.868900780  | 0.053755375  |
| H344  | 6.780953998  | -9.596857513  | -0.694824761 |
| H345  | 2.747613623  | -2.707053400  | 5.123322258  |
| H346  | 7.070836984  | -5.389877741  | -7.448583161 |
| H347  | 6.987743687  | -5.408520793  | -3.413130943 |
| H348  | 2.290822342  | -0.244993622  | -7.651474418 |
| H349  | 5.573722130  | 6.249370320   | -4.268947433 |
| H350  | 5.895998794  | -2.075099609  | 5.573335477  |
| H351  | 6.525126240  | -1.111469469  | 4.211852095  |
| H352  | 10.339047854 | -4.620581586  | -5.800060025 |
| H353  | 9.643740122  | -6.095825919  | -5.932873996 |
| H354  | 10.402264087 | -8.471603156  | -2.119629731 |
| H355  | 8.943653365  | -7.416545436  | -3.522801424 |
| H356  | 12.232944917 | -6.842804786  | -3.331869157 |
| H357  | 10.179581704 | -7.075260012  | -1.040526801 |
| H358  | 9.097373243  | -1.894752133  | 4.807125779  |
| H359  | -3.579266481 | 11.429923466  | 7.204123618  |
| H360  | 8.441154402  | -9.124488119  | 5.155940752  |
| H361  | 8.253967410  | -6.409415409  | 4.816792672  |
| H362  | -4.846361633 | 11.552397476  | 4.444702105  |
| H363  | -4.392213186 | 8.829677168   | 5.809391503  |
| H364  | -5.964752588 | 9.577521684   | 5.475707736  |
| H365  | -5.562103519 | 7.685649189   | -0.707336949 |
| H366  | 2.494296585  | -0.943494487  | -0.006270758 |
| H367  | -1.170076643 | 0.483208220   | -0.988033894 |
| Mo368 | 4.311904865  | -3.517580853  | -2.815468058 |
| N369  | -6.457718540 | -5.783901824  | -4.527829966 |
| N370  | -8.903188685 | -3.936984878  | -2.391230660 |
| N371  | -9.405455691 | -5.225431815  | 0.090847403  |
| N372  | -6.999779501 | -6.589245553  | 0.586921778  |
| N373  | -5.135540142 | -4.409053058  | 0.813774041  |
| N374  | -6.195459552 | -3.139238702  | 3.137744556  |
| N375  | -6.246167152 | -5.226466967  | 5.147137188  |
| N376  | -3.772760967 | -6.695363522  | 5.060000818  |
| N377  | -1.661958064 | -4.912120951  | 4.820173135  |
| N378  | -2.015524684 | -2.211156584  | 6.049756480  |
| N379  | -3.415546402 | -3.030779711  | 8.469765180  |
| N380  | 3.958221831  | -12.808345416 | 2.539381653  |
| N381  | 5.015531128  | -10.368688199 | 2.138181160  |
| N382  | 4.312378713  | -4.183261108  | 2.674669554  |
| N383  | 3.126456507  | -3.461678255  | 4.558156436  |
| N384  | 3.934356065  | -1.920185300  | 3.011764144  |
| N385  | 7.768580280  | -8.513622860  | 3.295088916  |
| N386  | -4.965730140 | -1.177315088  | -4.875259284 |
| N387  | -0.994980169 | -3.831958087  | -5.017499675 |
| N388  | -5.319056568 | 0.999749564   | -3.383260615 |
| N389  | -7.873232647 | 1.653041982   | -2.576810949 |
| N390  | -7.924232036 | 0.445111016   | -0.046529862 |
| N391  | -5.895297839 | 1.700094393   | 1.499052873  |
| N392  | -2.675392575 | 3.288721212   | -0.783608826 |
| N393  | -1.830011583 | 1.245194503   | -0.758444089 |
| N394  | -6.740055474 | 4.077710114   | 2.658398459  |
| N395  | -9.530196597 | 7.694592063   | 1.447716240  |

|      |               |               |               |
|------|---------------|---------------|---------------|
| N396 | -9.874359249  | 8.954912497   | 3.241358086   |
| N397 | 8.246530692   | 0.391314975   | 5.663596107   |
| N398 | 6.331897688   | 6.613792891   | 4.017380547   |
| N399 | 5.056411843   | 8.606161012   | 1.374244047   |
| N400 | 2.674528468   | 8.171454203   | -0.021473780  |
| N401 | -1.510288230  | 7.591036224   | -2.626063355  |
| N402 | -1.082507308  | 9.822828109   | -3.191595800  |
| N403 | -2.768083119  | 9.303464561   | -1.683366109  |
| N404 | 1.066179072   | 6.355484918   | 1.517317147   |
| N405 | 0.892559937   | 7.812213926   | 3.897087038   |
| N406 | -0.264413941  | 10.385280415  | 4.101594285   |
| N407 | -0.875695750  | 10.609774685  | 0.863032933   |
| N408 | -2.898871881  | 10.844113293  | 4.785268324   |
| N409 | 6.466559481   | -1.060952055  | -10.107719965 |
| N410 | 4.325074334   | 0.137232299   | -7.460172541  |
| N411 | 3.060762410   | 2.647220391   | -6.236363099  |
| N412 | 4.986148012   | 4.444305778   | -5.131621591  |
| N413 | 0.853741574   | 0.701981978   | -10.575629994 |
| N414 | -1.091026494  | 1.990032167   | -8.880854196  |
| N415 | 9.435262064   | -5.102340890  | -5.792071804  |
| N416 | 5.237194485   | -4.200998291  | -4.951844859  |
| N417 | 5.204195309   | -4.334640123  | -7.154967866  |
| N418 | 9.635294676   | -6.807073638  | -3.087527652  |
| N419 | 0.358075504   | 1.214841520   | 1.590894709   |
| N420 | 1.170825063   | 0.974113189   | 0.842127467   |
| O421 | -6.835222531  | -4.749380982  | -1.880997382  |
| O422 | -8.412287022  | -3.466523141  | 1.141630820   |
| O423 | -7.536210738  | -6.646822262  | 2.809900452   |
| O424 | -4.025401878  | -5.725797307  | 2.304273731   |
| O425 | -4.079702442  | -2.425192911  | 3.584606022   |
| O426 | -5.684388038  | -3.576790280  | 6.622756127   |
| O427 | -4.118530204  | -7.282255925  | 7.251602260   |
| O428 | -0.110002988  | -6.598586062  | 5.014583848   |
| O429 | 0.141259985   | -2.680746370  | 6.639315099   |
| O430 | -1.865758499  | -1.759845189  | 9.532964892   |
| O431 | -2.470341639  | -4.630641087  | 11.538997553  |
| O432 | 6.039044969   | -10.988334880 | 0.156195419   |
| O433 | 6.225840977   | -9.620286172  | 4.591209479   |
| O434 | 10.182560633  | -6.822050702  | 5.338144358   |
| O435 | -5.447092768  | -0.179494557  | -1.418847373  |
| O436 | -2.655195195  | -2.541770846  | -5.880711620  |
| O437 | -7.083388365  | 3.350322282   | -1.273899001  |
| O438 | -5.354416375  | 4.725545462   | -3.475658666  |
| O439 | -10.034572422 | 1.272301974   | 0.332895603   |
| O440 | -6.629361968  | 0.625021371   | 3.372490205   |
| O441 | -5.136790827  | 3.846892120   | 4.265425420   |
| O442 | -7.803253794  | 5.706067748   | 5.619180268   |
| O443 | 8.611413680   | -3.032636507  | 6.433825489   |
| O444 | 2.383165034   | 2.974979730   | 6.221078247   |
| O445 | 3.864409889   | 8.056226777   | 3.236969641   |
| O446 | 1.984144575   | 10.322456267  | 0.408275792   |
| O447 | -0.733034625  | 7.379386009   | 0.540542457   |
| O448 | -0.993255959  | 6.649982027   | 4.485391715   |
| O449 | 1.953637516   | 4.863397495   | 4.044979968   |
| O450 | 0.487223185   | 10.608963071  | 6.250789828   |
| O451 | -2.602925010  | 13.105486231  | 4.801872741   |
| O452 | -2.725625199  | 11.768686260  | 1.537197383   |
| O453 | -5.525031984  | 11.985244771  | 6.933859295   |
| O454 | -4.717646134  | 7.505714678   | -0.250036060  |
| O455 | 3.881817248   | -1.356167625  | -9.150201736  |
| O456 | 1.830473145   | 2.217661716   | -8.120846681  |

|  |                             |              |              |               |
|--|-----------------------------|--------------|--------------|---------------|
|  | O457                        | 3.689020903  | 6.222716447  | -5.756034993  |
|  | O458                        | 8.249710099  | 6.002587309  | -5.044948434  |
|  | O459                        | -2.634786722 | 0.890292294  | -10.152933431 |
|  | O460                        | 0.188499125  | -4.005469746 | -7.938224111  |
|  | O461                        | 2.208771946  | -3.060801060 | -8.000968744  |
|  | O462                        | -1.858906658 | 5.268300987  | -7.699348222  |
|  | O463                        | 10.530331151 | -4.751156510 | -2.768885270  |
|  | O464                        | 12.779258757 | -7.032725938 | -1.374001795  |
|  | O465                        | -0.064624297 | -5.556228819 | -2.568359564  |
|  | O466                        | 0.120925809  | -7.773335698 | -2.528930392  |
|  | O467                        | 5.377798807  | -9.578930094 | -5.430064054  |
|  | O468                        | 3.320140658  | -9.074056711 | -6.208806235  |
|  | O469                        | 5.261100570  | -5.403520158 | -2.007765042  |
|  | O470                        | 4.769495522  | -7.494978790 | -1.324581007  |
|  | O471                        | 3.028496602  | -5.101462693 | -3.350082513  |
|  | O472                        | 8.404514212  | -7.312745791 | 0.790094697   |
|  | O473                        | 6.880454301  | -4.980918577 | 0.261743732   |
|  | O474                        | -3.486314370 | 5.716842295  | -1.733497483  |
|  | O475                        | 7.998200904  | -9.790169558 | -3.755462256  |
|  | O476                        | 7.124977579  | -8.813258443 | -1.197241107  |
|  | S477                        | 4.221683872  | 5.248635129  | 0.746450395   |
|  | S478                        | 2.628172761  | 2.708377452  | -1.557994602  |
|  | S479                        | 2.795477494  | -2.014852300 | -3.830927512  |
|  | S480                        | 3.845571124  | 1.369192281  | 1.526846611   |
|  | S481                        | 0.960891343  | -0.269260047 | -1.802522842  |
|  | S482                        | 5.133236609  | 1.087260716  | -4.319420896  |
|  | S483                        | 3.589295548  | -3.282620434 | -0.552733397  |
|  | S484                        | 6.141660921  | 2.360030938  | -0.966167695  |
|  | S485                        | 6.349430208  | -2.261792634 | -2.811630307  |
|  | S486                        | 6.374648152  | -1.189214257 | 0.833680627   |
|  | <b>10u</b>                  |              |              |               |
|  | Fe( 139)                    | 0.548        | 2.327        |               |
|  | Fe( 140)                    | 0.366        | -1.302       |               |
|  | Fe( 141)                    | 0.561        | 2.769        |               |
|  | Fe( 142)                    | 0.536        | -2.449       |               |
|  | Fe( 143)                    | 0.562        | 2.854        |               |
|  | Fe( 144)                    | 0.500        | -2.279       |               |
|  | Fe( 145)                    | 0.421        | 1.351        |               |
|  | <b>S=2</b>                  |              |              |               |
|  | bm12cnx2b262n2x47d2ba.car_3 |              |              |               |
|  | C1                          | -7.834379723 | -5.141613022 | 0.419372370   |
|  | C2                          | -7.847152515 | -6.477650999 | -0.331818006  |
|  | C3                          | -9.026926301 | -3.030071701 | 0.833517105   |
|  | C4                          | -8.961627713 | -2.975441492 | 2.357965123   |
|  | C5                          | -9.396462139 | -4.092736908 | 4.483960604   |
|  | C6                          | -7.965429629 | -4.240016049 | 5.014848399   |
|  | C7                          | -5.696714471 | -5.047101573 | 4.551223271   |
|  | C8                          | -4.920466622 | -3.743114978 | 4.338419900   |
|  | C9                          | -4.545118769 | -1.773821831 | 2.951416613   |
|  | C10                         | -4.914361149 | -0.703748741 | 3.988964808   |
|  | C11                         | -6.630392804 | 0.299212263  | 5.381854796   |
|  | C12                         | -6.149532783 | 0.009089806  | 6.809443202   |
|  | C13                         | -6.007947067 | -1.629686435 | 8.620646956   |
|  | C14                         | -4.557156629 | -1.977887355 | 8.970449742   |
|  | C15                         | -2.470367138 | -3.042979780 | 8.225098506   |
|  | C16                         | -1.318801918 | -2.268114888 | 7.577820727   |
|  | C17                         | -0.710687560 | -0.479799388 | 5.970385778   |
|  | C18                         | -0.777373404 | 0.996657589  | 6.398341228   |
|  | C19                         | -0.843735566 | -0.692145572 | 4.437371534   |
|  | C20                         | 0.058498849  | 0.255731287  | 3.638469764   |
|  | C21                         | -0.552249090 | -2.152439803 | 4.071837648   |
|  | C22                         | -2.155187274 | 3.027771046  | 6.616238759   |
|  | C23                         | -2.399718203 | 3.143988074  | 8.134614949   |
|  | C24                         | -3.265381671 | 3.711045652  | 5.782111007   |
|  | C25                         | -3.543123457 | 5.129611895  | 6.293706989   |
|  | C26                         | -2.883203899 | 3.738875594  | 4.297104924   |
|  | C27                         | -3.697738422 | 2.474686257  | 10.073248497  |
|  | C28                         | -2.481582782 | 2.332742675  | 10.965760413  |
|  | C29                         | 4.364132064  | -9.731263426 | 8.069557576   |



|     |              |              |              |
|-----|--------------|--------------|--------------|
| C30 | 5.123648706  | -8.688374326 | 7.249413183  |
| C31 | 5.483087788  | -6.226346527 | 7.015212897  |
| C32 | 6.472458812  | -5.606348524 | 8.019523395  |
| C33 | 4.379082239  | -5.232162422 | 6.611261603  |
| C34 | 4.912978965  | -3.951325197 | 5.965137395  |
| C35 | 3.783150932  | -3.149193646 | 5.320735221  |
| C36 | 3.805208741  | -0.743861933 | 4.622648012  |
| C37 | 8.741069954  | -4.730809609 | 8.326752780  |
| C38 | 9.079456676  | -3.294563735 | 7.989978459  |
| C39 | -4.767158053 | -3.002501293 | -2.074129281 |
| C40 | -5.223655092 | -1.534766107 | -2.099174214 |
| C41 | -3.284504353 | -3.029094906 | -1.650121064 |
| C42 | -2.731089265 | -4.386135428 | -1.169444516 |
| C43 | -2.205073808 | -5.314504007 | -2.259535160 |
| C44 | -5.421123163 | 0.440163379  | -3.590104002 |
| C45 | -6.749180352 | 1.006906967  | -3.090279320 |
| C46 | -5.192314565 | 0.704130589  | -5.103519610 |
| C47 | -9.065458431 | 0.529409670  | -2.445777171 |
| C48 | -9.013132329 | 0.912860174  | -0.959334226 |
| C49 | -7.687333842 | 0.929896858  | 1.111529421  |
| C50 | -6.603686632 | 1.987732290  | 1.343695043  |
| C51 | -4.858795548 | 3.432757990  | 0.404429044  |
| C52 | -5.497405896 | 4.824392822  | 0.589154503  |
| C53 | -3.961301954 | 3.530934180  | -0.839692800 |
| C54 | -3.114556072 | 2.342411277  | -1.186363528 |
| C55 | -2.659920738 | 1.280648085  | -0.431734690 |
| C56 | -1.849919742 | 1.139326571  | -2.481622833 |
| C57 | -7.229963202 | 6.339545147  | -0.277361939 |
| C58 | -7.586137623 | 6.875875085  | 1.106060581  |
| C59 | -8.505025994 | 6.191254833  | -1.143964548 |
| C60 | -9.011222856 | 7.443402806  | -1.797101229 |
| C61 | -9.175571290 | 8.720312977  | -1.295315573 |
| C62 | -9.815441890 | 8.636140243  | -3.415444145 |
| C63 | 7.703449862  | 2.565921977  | 5.487435963  |
| C64 | 8.603385189  | 1.400208263  | 5.855219423  |
| C65 | 6.382830740  | 1.956197579  | 4.951610979  |
| C66 | 5.356748061  | 3.002064004  | 4.581743041  |
| C67 | 4.443564009  | 3.503887271  | 5.526771715  |
| C68 | 5.291064110  | 3.507927967  | 3.270855727  |
| C69 | 3.492112661  | 4.469599547  | 5.177709370  |
| C70 | 4.354452730  | 4.477625146  | 2.909946636  |
| C71 | 3.452450034  | 4.955362334  | 3.863841621  |
| C72 | 5.906439968  | 6.835895351  | -1.568229458 |
| C73 | 4.960653749  | 7.707359010  | -2.404717295 |
| C74 | 5.159073612  | 5.606625580  | -1.031852297 |
| C75 | 4.374948664  | 8.515202072  | -4.649120634 |
| C76 | 2.994161223  | 7.928310601  | -4.951646769 |
| C77 | 1.510319856  | 5.961226637  | -4.788616063 |
| C78 | 0.598540617  | 6.158245028  | -3.557402692 |
| C79 | 1.752260895  | 4.481489014  | -5.136460766 |
| C80 | 0.519352017  | 3.603099411  | -5.384805217 |
| C81 | -0.295897786 | 3.895403311  | -6.657203052 |
| C82 | -1.700934025 | 5.911001111  | -7.065238632 |
| C83 | 0.372822811  | 6.249856066  | -1.130830913 |
| C84 | 0.145366243  | 7.728046685  | -0.756982812 |
| C85 | 0.952783676  | 5.530736845  | 0.093792867  |
| C86 | 1.185494168  | 9.936375755  | -0.592630603 |
| C87 | 0.616124888  | 11.133270509 | -1.348000228 |
| C88 | -0.511538455 | 11.978291139 | -3.358954011 |
| C89 | -1.926290088 | 12.499179686 | -3.028840748 |
| C90 | -0.390984324 | 11.621649291 | -4.857220400 |

|       |              |               |              |
|-------|--------------|---------------|--------------|
| C91   | -1.298009758 | 10.457234511  | -5.242727300 |
| C92   | -4.077866498 | 12.014377651  | -1.945819343 |
| C93   | -4.207396488 | 13.290828794  | -1.125049188 |
| C94   | -4.731443582 | 10.832315257  | -1.179621843 |
| C95   | -4.746131557 | 9.557045305   | -1.992638927 |
| C96   | -5.762172234 | 9.321946000   | -2.931360479 |
| C97   | -3.726281252 | 8.599633376   | -1.865757187 |
| C98   | -5.758220184 | 8.177193909   | -3.730101687 |
| C99   | -3.694563427 | 7.458467680   | -2.671399326 |
| C100  | -4.713051021 | 7.260400669   | -3.601767199 |
| C101  | 6.058483039  | -5.735846573  | -6.689898936 |
| C102  | 4.568010705  | -5.462269470  | -6.567583263 |
| C103  | 2.867670095  | -3.747740626  | -5.975026557 |
| C104  | 2.496550804  | -2.609708566  | -6.932790146 |
| C105  | 2.789133727  | -0.229937059  | -7.428843977 |
| C106  | 3.914100005  | 0.792936061   | -7.550977610 |
| C107  | 6.069049375  | 1.654159400   | -6.775655803 |
| C108  | 7.232967469  | 1.318487979   | -7.686785783 |
| C109  | -0.501315051 | -5.734549564  | -8.366096796 |
| C110  | -1.565349975 | -4.651066009  | -8.578571339 |
| C111  | -0.366239501 | -6.029322054  | -6.854570388 |
| C112  | 0.362370866  | -7.363659064  | -6.606454964 |
| C113  | 0.771777275  | -7.481462236  | -5.155707925 |
| C114  | -2.083244435 | -2.256512039  | -8.598450131 |
| C115  | -1.474937101 | -1.135138810  | -9.418397446 |
| C116  | -2.701421959 | -1.810989243  | -7.251215217 |
| C117  | -1.675328981 | -1.629457971  | -6.161313390 |
| C118  | -0.926218615 | -0.445398397  | -6.054764267 |
| C119  | -1.412606120 | -2.672723417  | -5.256649133 |
| C120  | 0.071960004  | -0.324213728  | -5.082886625 |
| C121  | -0.418948370 | -2.546676691  | -4.281515431 |
| C122  | 0.336012918  | -1.373563770  | -4.197791899 |
| C123  | 8.620715400  | -6.754443069  | -0.928352258 |
| C124  | 9.533331747  | -6.610996181  | 0.301998718  |
| C125  | 7.176672377  | -7.123379241  | -0.552745973 |
| C126  | 6.185540248  | -7.130898010  | -1.677199039 |
| C127  | 6.164485749  | -7.970497635  | -2.772627208 |
| C128  | 4.339551218  | -6.716319481  | -2.773474774 |
| C129  | 10.310585240 | -7.460603505  | 2.445280479  |
| C130  | 11.770988873 | -7.338782858  | 2.071025159  |
| C131  | 0.408293709  | -6.733638458  | 1.879190096  |
| C132  | 1.779851260  | -6.275369541  | 2.300861755  |
| C133  | 2.921259498  | -6.771438396  | 1.327016126  |
| C134  | 2.851128066  | -8.320183788  | 1.193750802  |
| C135  | 4.037522676  | -8.903954716  | 0.407270963  |
| C136  | 4.146872678  | -10.399827779 | 0.501896428  |
| C137  | 4.278548777  | -6.447790243  | 2.026571990  |
| C138  | 4.128366644  | -1.037997836  | -1.117065801 |
| Fe139 | 4.616632169  | -2.607747163  | -2.210613835 |
| Fe140 | 2.774761984  | 0.437226756   | -0.864811756 |
| Fe141 | 5.394299980  | 0.298006635   | -0.276184680 |
| Fe142 | 4.684131161  | -0.098584315  | -2.747371861 |
| Fe143 | 4.401156773  | 2.369740941   | -1.849330894 |
| Fe144 | 5.056286522  | -2.123374724  | 0.299098296  |
| Fe145 | 2.546520276  | -2.231554592  | -0.556425745 |
| H146  | -6.149865674 | -7.225987049  | 0.511458637  |
| H147  | -5.920012891 | -6.629787318  | -0.989708317 |
| H148  | -9.643945216 | -4.648371161  | -0.416895336 |
| H149  | -8.249863159 | -6.318614511  | -1.344296401 |
| H150  | -8.579089692 | -7.121774795  | 0.186736183  |
| H151  | -8.205850711 | -2.398273657  | 0.465689114  |

|      |              |              |               |
|------|--------------|--------------|---------------|
| H152 | -9.880469271 | -4.806253086 | 2.510342531   |
| H153 | -9.974809234 | -2.578178502 | 0.510487526   |
| H154 | -9.994854949 | -4.945755800 | 4.831528101   |
| H155 | -7.399005936 | -5.183860389 | 3.281855085   |
| H156 | -9.808567454 | -3.179292672 | 4.933336507   |
| H157 | -3.452767040 | -1.877915316 | 2.980270051   |
| H158 | -5.809919731 | -3.459511304 | 2.493003178   |
| H159 | -5.255977885 | -5.835055823 | 3.925167495   |
| H160 | -6.251620258 | 1.289087835  | 5.099139787   |
| H161 | -6.898246920 | -1.298536841 | 3.967655787   |
| H162 | -5.569242501 | -5.326113705 | 5.604228709   |
| H163 | -4.831985202 | -1.434213257 | 1.946001102   |
| H164 | -6.717867060 | -1.975798128 | 6.635546222   |
| H165 | -7.728985527 | 0.330986678  | 5.381697565   |
| H166 | -1.242479964 | -2.845536152 | 4.574505840   |
| H167 | -0.642183866 | -2.297999312 | 2.984697653   |
| H168 | 0.478038644  | -2.426602754 | 4.350874814   |
| H169 | -1.889925032 | -0.470035472 | 4.171468446   |
| H170 | -6.626286105 | -2.500829911 | 8.881493633   |
| H171 | -2.738496216 | 2.729736535  | 3.886255346   |
| H172 | -3.976621143 | 1.778338960  | 8.076728449   |
| H173 | -3.882736533 | 5.137143650  | 7.339521747   |
| H174 | -0.133482716 | 0.134900479  | 2.563044857   |
| H175 | 1.120880415  | 0.024523817  | 3.799025833   |
| H176 | 7.468938169  | 3.113805854  | 6.420418452   |
| H177 | -3.673772298 | 4.229521828  | 3.710564157   |
| H178 | -4.321633196 | 5.603337379  | 5.678069605   |
| H179 | -1.948867385 | 4.305949770  | 4.151817173   |
| H180 | -2.636309053 | 5.751709953  | 6.230637298   |
| H181 | -4.189575068 | 3.116142442  | 5.896299631   |
| H182 | -1.204876770 | 3.555458859  | 6.448428476   |
| H183 | -2.722070867 | 1.164818246  | 5.703531551   |
| H184 | -0.108861418 | 1.313199186  | 3.894610768   |
| H185 | 1.219743920  | 4.498712688  | -0.189706816  |
| H186 | 0.155608402  | 5.491564409  | 0.852103273   |
| H187 | 2.162384681  | 6.066559310  | 1.546563769   |
| H188 | 1.899124222  | 6.077195490  | 4.170594230   |
| H189 | 4.295216750  | 4.831997286  | 1.881172544   |
| H190 | 5.956953515  | 3.106649985  | 2.503927167   |
| H191 | 4.464418807  | 3.131542926  | 6.554365771   |
| H192 | -2.666855895 | -1.165627681 | 6.519472527   |
| H193 | -2.391802726 | -4.082328115 | 7.872303442   |
| H194 | -2.295483722 | -3.039602931 | 9.309079094   |
| H195 | -4.246093978 | -2.791512333 | 7.084884142   |
| H196 | -6.296132135 | -0.797626740 | 9.275845330   |
| H197 | 2.776280420  | 4.829788694  | 5.920937046   |
| H198 | 0.279292094  | -0.826014960 | 6.295434453   |
| H199 | -4.199575710 | 3.428219656  | 10.306721431  |
| H200 | -4.389048958 | 1.654771096  | 10.326813174  |
| H201 | -1.659676025 | 1.705657800  | 10.549526034  |
| H202 | 9.655326740  | -5.340703023 | 8.269479260   |
| H203 | -0.677080461 | -6.621368151 | -2.652503716  |
| H204 | 0.592860546  | -8.194119760 | 3.132272640   |
| H205 | -0.313338394 | -8.197475768 | -6.845030509  |
| H206 | 1.248575495  | -7.434455376 | -7.254687939  |
| H207 | -1.360894061 | -6.072094173 | -6.384720675  |
| H208 | -0.719975824 | -1.473716021 | -10.168467416 |
| H209 | -0.944681957 | -6.626740126 | -8.835445433  |
| H210 | -2.673529511 | -2.646934469 | -2.482630511  |
| H211 | -3.513943799 | -4.941223366 | -0.621440349  |
| H212 | -0.169461747 | -3.155199259 | -8.244277019  |

|      |               |              |              |
|------|---------------|--------------|--------------|
| H213 | -2.913246014  | -2.632678801 | -9.229756744 |
| H214 | 1.276408993   | -4.694244661 | -8.625760285 |
| H215 | -0.575219369  | -5.827628083 | -1.083291614 |
| H216 | 0.169641812   | -5.195580701 | -6.375732565 |
| H217 | 1.336412103   | -6.266561100 | -9.106906183 |
| H218 | -5.899465941  | -4.050108389 | -3.441087265 |
| H219 | -3.166586886  | -2.315736742 | -0.821053210 |
| H220 | 2.560289255   | -6.829377637 | -5.671691886 |
| H221 | -1.921770821  | -4.191313646 | -0.450833146 |
| H222 | -4.263426402  | 3.243633512  | 1.308232020  |
| H223 | -2.820647042  | 1.006234723  | 0.606531372  |
| H224 | -8.627150097  | 1.344090665  | 1.501093341  |
| H225 | -7.163037703  | -0.010477532 | -0.726819690 |
| H226 | -7.017080013  | 4.244269116  | -0.665305229 |
| H227 | -8.963827160  | 9.159068761  | -0.326441137 |
| H228 | -7.911245426  | 6.082247446  | 1.822608553  |
| H229 | -9.294325769  | 5.709544854  | -0.539966414 |
| H230 | -6.525758746  | 7.040123150  | -0.754423273 |
| H231 | -10.204836806 | 8.973581390  | -4.372897199 |
| H232 | -3.308638364  | 4.407441421  | -0.687461420 |
| H233 | -4.595975239  | 3.765657192  | -1.709927801 |
| H234 | -9.908895557  | 10.454821398 | -2.311232458 |
| H235 | -8.272602803  | 5.489515911  | -1.960459473 |
| H236 | -6.066686388  | 2.011124592  | -0.658940373 |
| H237 | -7.434918030  | 0.059600772  | 1.734318865  |
| H238 | -9.493097501  | 1.396815714  | -2.966826806 |
| H239 | -1.293664916  | 0.750814864  | -3.328408284 |
| H240 | -9.768664041  | -0.306642433 | -2.563763122 |
| H241 | 9.083063513   | 3.960185484  | 4.890620068  |
| H242 | 7.683327131   | 4.022250560  | 4.048303759  |
| H243 | 2.140134933   | 5.677790632  | -2.243059746 |
| H244 | -0.625633187  | 5.831003855  | -1.325241209 |
| H245 | 1.933193118   | 8.250435346  | -1.616187191 |
| H246 | -3.081273224  | 3.279129879  | -3.831506228 |
| H247 | -4.650265056  | 2.616505312  | -5.140282561 |
| H248 | -3.916290007  | 4.573972125  | -4.268554809 |
| H249 | -4.173725514  | 0.343245624  | -5.336647244 |
| H250 | -5.906939754  | 0.092566984  | -5.678155852 |
| H251 | 0.664964533   | 11.405202685 | -5.077035648 |
| H252 | -0.698617133  | 12.502746955 | -5.435114901 |
| H253 | 0.315124811   | 9.099006047  | -5.261123559 |
| H254 | -1.289441583  | 8.419310621  | -5.423449478 |
| H255 | -1.220540822  | 7.175126223  | -8.594708495 |
| H256 | -0.679414483  | 2.954706806  | -7.080351030 |
| H257 | -6.568983858  | 7.997319529  | -4.440995112 |
| H258 | -2.934891183  | 8.726172271  | -1.121612976 |
| H259 | -3.246528225  | 6.468668724  | -5.818605657 |
| H260 | 2.332473950   | 4.015377602  | -4.324199133 |
| H261 | 3.530450699   | 6.127626923  | -4.106881933 |
| H262 | -0.146534582  | 3.597807393  | -4.507801171 |
| H263 | -7.639038877  | -0.823114841 | -3.308076229 |
| H264 | 4.904123053   | 8.640191512  | -5.603833911 |
| H265 | -5.027071290  | -1.662168904 | -4.080061820 |
| H266 | 2.395906242   | 4.459996818  | -6.031973498 |
| H267 | -2.865377752  | 6.752848673  | -2.600291246 |
| H268 | 4.198401795   | 9.515462450  | -4.228422523 |
| H269 | -0.480965751  | 5.625049547  | -8.693885508 |
| H270 | -3.093914302  | 7.385264888  | -7.274860346 |
| H271 | -4.266066213  | -4.377474936 | -3.511947828 |
| H272 | -5.357439123  | -3.474435168 | -1.264891629 |
| H273 | -6.580241897  | 10.038848481 | -3.038731744 |

|      |              |               |              |
|------|--------------|---------------|--------------|
| H274 | -4.651740829 | 0.987045770   | -3.024407063 |
| H275 | 0.986761228  | 6.464979456   | -5.611591550 |
| H276 | 0.359257313  | 4.340613851   | -7.417114100 |
| H277 | 0.900237731  | 2.577262867   | -5.476984813 |
| H278 | -2.133868179 | 4.462763506   | -5.701914745 |
| H279 | 0.685158105  | 9.919061877   | 0.387309182  |
| H280 | -0.052949813 | 9.923839510   | -2.867049738 |
| H281 | 0.154478944  | 12.830491250  | -3.160038665 |
| H282 | 2.249202595  | 10.153738923  | -0.423486226 |
| H283 | -2.294320327 | 10.823867590  | -1.925310900 |
| H284 | 6.591610370  | -4.809979444  | -6.950408230 |
| H285 | 6.390942893  | -6.022667012  | -5.669791969 |
| H286 | 8.618693072  | -5.763199054  | -1.403402956 |
| H287 | 7.260534917  | -7.104275179  | -7.606422617 |
| H288 | 5.684657819  | -7.548221913  | -7.533447701 |
| H289 | 5.874598412  | 4.982376193   | -0.481383170 |
| H290 | 5.709508900  | 8.012393050   | 0.085464790  |
| H291 | 5.961519378  | 7.178930258   | -4.123870340 |
| H292 | 4.357152045  | 5.930339716   | -0.353291418 |
| H293 | 7.044591530  | 8.355207368   | -0.795291602 |
| H294 | 6.443207249  | 1.798291852   | -5.750335866 |
| H295 | 6.740006991  | 6.494439078   | -2.202348629 |
| H296 | 3.773075917  | -4.990159331  | 7.500183107  |
| H297 | 6.020633111  | -6.549179137  | 6.115506596  |
| H298 | 5.082421884  | -0.093430625  | -6.070574078 |
| H299 | 3.889109675  | 1.081046587   | 3.711098299  |
| H300 | 2.539645521  | -0.562330649  | -8.444825249 |
| H301 | -0.229768383 | -3.354464458  | -3.570270583 |
| H302 | 1.909975957  | 0.323182498   | -7.058554766 |
| H303 | 3.063121222  | -2.805937360  | 6.074429245  |
| H304 | 3.508531223  | -1.338471860  | -5.700933754 |
| H305 | 3.225712792  | -3.788086166  | 4.615456500  |
| H306 | 3.726008223  | -5.759560505  | 5.897537325  |
| H307 | 5.642539690  | -4.199311360  | 5.179782358  |
| H308 | 5.430008171  | -3.322084939  | 6.707288710  |
| H309 | -3.431198491 | -2.576543792  | -6.951192760 |
| H310 | 4.289536138  | -7.316140415  | 8.440949001  |
| H311 | 3.568688984  | -10.111978182 | 7.411028400  |
| H312 | 1.097406633  | -1.267635694  | -3.423512430 |
| H313 | 4.410168958  | -9.254829965  | 10.071927690 |
| H314 | 2.933041152  | -9.731405436  | 9.547925774  |
| H315 | 4.814876038  | -2.227291937  | 3.717797785  |
| H316 | 0.650638047  | 0.596490641   | -4.991130369 |
| H317 | -2.005759199 | -3.588976305  | -5.303302697 |
| H318 | 7.454945747  | -9.579864378  | 2.990942152  |
| H319 | 7.178580777  | -8.128915591  | -0.095378013 |
| H320 | 6.121219839  | -7.618107082  | 3.570998744  |
| H321 | 6.938821341  | -10.571564362 | 1.928584278  |
| H322 | 7.072682993  | 0.443333560   | -8.362349330 |
| H323 | 6.208790216  | -4.667135340  | 2.429773997  |
| H324 | 2.010279152  | -6.605774427  | 3.323976875  |
| H325 | 4.969334234  | -3.552171940  | -5.944089447 |
| H326 | 2.843796820  | -8.751743458  | 2.206769317  |
| H327 | 4.659233144  | -8.159737930  | -4.286145135 |
| H328 | 3.376794878  | -6.325725115  | -3.078521213 |
| H329 | 5.064347101  | -10.567299305 | 8.237890403  |
| H330 | 4.514065988  | -0.230755808  | 2.754796077  |
| H331 | 7.862363374  | -5.085841991  | 4.135133134  |
| H332 | 7.008616602  | -3.334601509  | 2.437812767  |
| H333 | 7.885060644  | -5.470195910  | 6.494966167  |
| H334 | 3.251235938  | -0.793183808  | 6.604584194  |

|       |              |               |              |
|-------|--------------|---------------|--------------|
| H335  | 3.211831983  | -12.002048926 | 0.126019222  |
| H336  | 3.934685108  | -8.623352781  | -0.651419584 |
| H337  | 4.986750384  | -8.498596585  | 0.774375473  |
| H338  | 1.911536275  | -8.595380393  | 0.693073469  |
| H339  | 2.773581116  | -3.425447966  | -4.926240291 |
| H340  | -1.131676681 | 0.380766928   | -6.740780899 |
| H341  | -3.250194071 | -0.875419580  | -7.438822939 |
| H342  | 1.796873402  | -5.178342356  | 2.261594214  |
| H343  | 7.886514634  | -6.605057408  | 4.460986226  |
| H344  | 6.578987892  | -8.413386609  | 4.828061517  |
| H345  | 2.739432428  | 0.615869956   | 5.749308333  |
| H346  | 6.865631311  | -8.726116859  | -3.103804990 |
| H347  | 6.822275736  | -6.430223662  | 0.219750506  |
| H348  | 2.186516281  | -4.580778006  | -6.160455052 |
| H349  | 5.644299039  | 2.612446687   | -7.116273879 |
| H350  | 5.983194958  | 1.294177783   | 5.734813617  |
| H351  | 6.617387193  | 1.336223161   | 4.071091385  |
| H352  | 10.120037530 | -7.373079654  | -2.184752363 |
| H353  | 9.355151303  | -8.611423483  | -1.436706317 |
| H354  | 10.199377029 | -8.393427798  | 3.020488060  |
| H355  | 8.739255295  | -8.290365829  | 1.269545822  |
| H356  | 12.045846453 | -7.789403590  | 1.087508388  |
| H357  | 10.023127304 | -6.624778058  | 3.103723704  |
| H358  | 9.208242157  | 1.005488580   | 5.003310362  |
| H359  | -3.309264202 | 13.558318627  | -0.519808756 |
| H360  | 8.391006120  | -4.743312626  | 9.373909022  |
| H361  | 8.263250765  | -2.710349247  | 7.500740674  |
| H362  | -4.620509935 | 12.172491652  | -2.892135044 |
| H363  | -4.193114068 | 10.676362922  | -0.231281506 |
| H364  | -5.757925430 | 11.136250020  | -0.927030491 |
| H365  | -5.485301741 | 6.036489421   | -4.905493791 |
| H366  | 1.964495516  | -0.764359911  | -0.024140132 |
| H367  | -1.260322865 | -0.272360577  | -1.013710477 |
| Mo368 | 4.114708530  | -4.555268087  | -0.357855473 |
| N369  | -6.573326566 | -7.171451613  | -0.418737798 |
| N370  | -8.946928265 | -4.370936889  | 0.269561110  |
| N371  | -9.481053556 | -4.030744680  | 3.033479351  |
| N372  | -7.111045376 | -4.941643863  | 4.229457443  |
| N373  | -5.188939585 | -3.057846661  | 3.198088416  |
| N374  | -6.203101353 | -0.691508969  | 4.408278713  |
| N375  | -6.282022767 | -1.273614659  | 7.238696647  |
| N376  | -3.811606868 | -2.541246125  | 7.978830055  |
| N377  | -1.674984434 | -1.281955354  | 6.716330944  |
| N378  | -1.967444759 | 1.633849806   | 6.209044280  |
| N379  | -3.365226910 | 2.349965181   | 8.664498748  |
| N380  | 3.756515543  | -9.186583888  | 9.288797842  |
| N381  | 4.889186020  | -7.414415820  | 7.614705800  |
| N382  | 4.289631330  | -1.995532409  | 4.565486053  |
| N383  | 3.136687449  | -0.318092667  | 5.716101193  |
| N384  | 3.950530421  | 0.074309805   | 3.572347052  |
| N385  | 7.685038912  | -5.286796015  | 7.502322809  |
| N386  | -4.969269212 | -3.628651919  | -3.385451591 |
| N387  | -1.071876085 | -5.979881549  | -1.961101754 |
| N388  | -5.275063318 | -0.990088816  | -3.339660295 |
| N389  | -7.799569947 | 0.145917750   | -3.043659573 |
| N390  | -7.913719271 | 0.517620334   | -0.261335225 |
| N391  | -5.864439777 | 2.384854043   | 0.269627983  |
| N392  | -2.603391548 | 2.239626365   | -2.473617504 |
| N393  | -1.866727013 | 0.527456513   | -1.273610110 |
| N394  | -6.630894049 | 5.022116706   | -0.134436909 |
| N395  | -9.415345188 | 7.404555056   | -3.122385112 |

|      |              |              |              |
|------|--------------|--------------|--------------|
| N396 | -9.684383154 | 9.463589539  | -2.339868890 |
| N397 | 8.361974186  | 3.375865281  | 4.460438069  |
| N398 | 6.479370088  | 7.580220716  | -0.435957505 |
| N399 | 5.206385629  | 7.744859734  | -3.745577940 |
| N400 | 2.800491949  | 6.630477357  | -4.633933328 |
| N401 | -1.447360861 | 4.775670858  | -6.423340343 |
| N402 | -0.962308352 | 6.313196966  | -8.124643192 |
| N403 | -2.659947984 | 6.751312883  | -6.608750080 |
| N404 | 1.182489694  | 6.059100249  | -2.331222426 |
| N405 | 1.069026575  | 8.626168534  | -1.214471216 |
| N406 | -0.061103286 | 10.879694970 | -2.507710380 |
| N407 | -0.702726055 | 9.237412799  | -5.261566225 |
| N408 | -2.681248328 | 11.716632806 | -2.220486458 |
| N409 | 6.306067592  | -6.754273723 | -7.714392185 |
| N410 | 4.229718122  | -4.206848161 | -6.218414601 |
| N411 | 3.027388047  | -1.409795858 | -6.617180803 |
| N412 | 5.021887119  | 0.647423008  | -6.778679371 |
| N413 | 0.739882155  | -5.436469558 | -9.091257963 |
| N414 | -1.142083715 | -3.359414651 | -8.496451257 |
| N415 | 9.196633772  | -7.708999790 | -1.896244906 |
| N416 | 5.033132094  | -6.344745326 | -1.701660142 |
| N417 | 4.995202136  | -7.694677729 | -3.447382386 |
| N418 | 9.451174706  | -7.560491549 | 1.276047569  |
| N419 | 0.423622187  | 1.947102372  | 0.091317162  |
| N420 | 1.279799471  | 1.350407340  | -0.341273944 |
| O421 | -6.898603980 | -4.804271320 | 1.167988282  |
| O422 | -8.463671031 | -1.995988299 | 2.936220567  |
| O423 | -7.644796284 | -3.761949204 | 6.115648402  |
| O424 | -4.097765100 | -3.339435540 | 5.175858071  |
| O425 | -4.071395681 | 0.103844642  | 4.409803870  |
| O426 | -5.705634227 | 0.916344000  | 7.534898986  |
| O427 | -4.139350794 | -1.783241630 | 10.120507260 |
| O428 | -0.149145320 | -2.581936069 | 7.843847272  |
| O429 | 0.213264482  | 1.559042080  | 6.893090590  |
| O430 | -1.750535250 | 3.933789401  | 8.841616339  |
| O431 | -2.420125338 | 2.804852524  | 12.091718647 |
| O432 | 5.863537146  | -9.059308266 | 6.313009207  |
| O433 | 6.147515493  | -5.427919477 | 9.206608467  |
| O434 | 10.160685574 | -2.786518357 | 8.244271639  |
| O435 | -5.509781083 | -0.913300601 | -1.055224613 |
| O436 | -2.795909584 | -5.472847639 | -3.352228918 |
| O437 | -6.841251971 | 2.189027151  | -2.716878310 |
| O438 | -5.384401865 | 2.046214223  | -5.494931019 |
| O439 | -9.964420273 | 1.536010481  | -0.465122517 |
| O440 | -6.429674044 | 2.437956163  | 2.483518911  |
| O441 | -4.970435322 | 5.713288258  | 1.268681387  |
| O442 | -7.583852023 | 8.055224435  | 1.416036508  |
| O443 | 8.664605371  | 0.901568736  | 6.970031692  |
| O444 | 2.532272095  | 5.898218805  | 3.450941045  |
| O445 | 4.027418056  | 8.353418693  | -1.894764396 |
| O446 | 2.139361925  | 8.654226738  | -5.500080614 |
| O447 | -0.606141808 | 6.416726312  | -3.713410842 |
| O448 | -0.810617535 | 8.046177624  | -0.037550453 |
| O449 | 2.090879027  | 6.244978755  | 0.586872164  |
| O450 | 0.766161940  | 12.275670336 | -0.895044492 |
| O451 | -2.318699907 | 13.583484621 | -3.481687872 |
| O452 | -2.512121978 | 10.621994320 | -5.444994765 |
| O453 | -5.229028420 | 13.957436837 | -1.088571528 |
| O454 | -4.641003979 | 6.125246719  | -4.422129726 |
| O455 | 3.738587808  | -6.389637828 | -6.750488554 |
| O456 | 1.781796522  | -2.804824994 | -7.939502504 |

|                       |                       |              |               |              |
|-----------------------|-----------------------|--------------|---------------|--------------|
|                       | O457                  | 3.757930587  | 1.740956504   | -8.338985913 |
|                       | O458                  | 8.275525670  | 1.953542576   | -7.700408876 |
|                       | O459                  | -2.754268152 | -4.950462820  | -8.781709873 |
|                       | O460                  | 0.013503429  | -7.839205982  | -4.259947763 |
|                       | O461                  | 2.036219000  | -7.117097933  | -4.859727282 |
|                       | O462                  | -1.793887396 | 0.041766713   | -9.330099055 |
|                       | O463                  | 10.389636860 | -5.709670542  | 0.369828638  |
|                       | O464                  | 12.619814448 | -6.861605243  | 2.811090424  |
|                       | O465                  | -0.299328249 | -6.199241004  | 1.041128012  |
|                       | O466                  | -0.066899639 | -7.871133153  | 2.489303370  |
|                       | O467                  | 5.105303932  | -11.022048129 | 0.954777255  |
|                       | O468                  | 3.049205541  | -11.040491320 | 0.019172816  |
|                       | O469                  | 5.058014539  | -5.649132428  | 1.371194428  |
|                       | O470                  | 4.568878153  | -6.985136025  | 3.120835389  |
|                       | O471                  | 2.809493461  | -6.140363826  | 0.102884213  |
|                       | O472                  | 8.285010969  | -5.740904356  | 4.747495510  |
|                       | O473                  | 6.763981915  | -4.087811587  | 3.011501795  |
|                       | O474                  | -3.453652762 | 3.787829094   | -4.630879050 |
|                       | O475                  | 7.753213873  | -10.328847414 | 2.415213845  |
|                       | O476                  | 6.924912469  | -8.061283248  | 3.966721718  |
|                       | S477                  | 4.371642921  | 4.603592678   | -2.372437271 |
|                       | S478                  | 2.888841703  | 1.234371792   | -3.016274792 |
|                       | S479                  | 2.740236850  | -3.821511492  | -2.144946971 |
|                       | S480                  | 3.975757846  | 1.943088985   | 0.354432223  |
|                       | S481                  | 0.378987588  | -2.114213778  | -0.555228042 |
|                       | S482                  | 5.220799113  | -1.732246843  | -4.178785684 |
|                       | S483                  | 3.326917754  | -3.064267071  | 1.336100532  |
|                       | S484                  | 6.366712846  | 1.235167455   | -2.143169793 |
|                       | S485                  | 6.206815318  | -3.565244281  | -0.933942998 |
|                       | S486                  | 6.347270480  | -0.753659063  | 1.449238921  |
| <b>11</b>             | bmlcnx262n2x351.car_1 |              |               |              |
| Fe( 139) 0.553 -2.379 | C1                    | -8.187182156 | -4.447705328  | -1.394492609 |
| Fe( 140) 0.322 -0.129 | C2                    | -8.224678753 | -5.572270052  | -2.436264405 |
| Fe( 141) 0.562 -2.775 | C3                    | -9.282597593 | -2.410242301  | -0.562393953 |
| Fe( 142) 0.572 2.694  | C4                    | -9.313765632 | -2.709149438  | 0.933942740  |
| Fe( 143) 0.606 3.204  | C5                    | -9.977698756 | -4.226220849  | 2.723430959  |
| Fe( 144) 0.507 2.295  | C6                    | -8.604862798 | -4.609013321  | 3.288686031  |
| Fe( 145) 0.376 -1.409 | C7                    | -6.369489195 | -5.478539783  | 2.796394523  |
| <b>S=1</b>            | C8                    | -5.500754081 | -4.224075467  | 2.942478959  |
|                       | C9                    | -4.893584674 | -2.027540417  | 2.078281568  |
|                       | C10                   | -5.276584029 | -1.193077384  | 3.308283574  |
|                       | C11                   | -7.028595068 | -0.410969877  | 4.797275553  |
|                       | C12                   | -6.677374689 | -1.060520548  | 6.143377634  |
|                       | C13                   | -6.800849101 | -3.075355072  | 7.530929507  |
|                       | C14                   | -5.424895254 | -3.653793180  | 7.882419424  |
|                       | C15                   | -3.364940870 | -4.706086658  | 7.047824411  |
|                       | C16                   | -2.114984411 | -3.883400436  | 6.721822594  |
|                       | C17                   | -1.261592664 | -1.812609297  | 5.650115805  |
|                       | C18                   | -1.274795277 | -0.480240633  | 6.422237048  |
|                       | C19                   | -1.286228603 | -1.653580175  | 4.106765543  |
|                       | C20                   | -0.274637620 | -0.613479597  | 3.616024183  |
|                       | C21                   | -1.054205941 | -3.007401695  | 3.425008111  |
|                       | C22                   | -2.513911073 | 1.563475966   | 7.014610071  |
|                       | C23                   | -2.876978998 | 1.344763016   | 8.496838881  |
|                       | C24                   | -3.498236587 | 2.518669359   | 6.297957604  |
|                       | C25                   | -3.711727538 | 3.802296731   | 7.109546432  |
|                       | C26                   | -2.999305090 | 2.855728921   | 4.887130179  |
|                       | C27                   | -4.369310582 | 0.353564218   | 10.134243533 |
|                       | C28                   | -3.239911668 | -0.083655283  | 11.045010280 |
|                       | C29                   | 3.011232830  | -11.721297979 | 5.810124988  |



|     |              |               |              |
|-----|--------------|---------------|--------------|
| C30 | 3.885603451  | -10.575776277 | 5.299807245  |
| C31 | 4.423769351  | -8.168569418  | 5.685220772  |
| C32 | 5.356330223  | -7.883332798  | 6.876376632  |
| C33 | 3.427222106  | -7.017687409  | 5.454050111  |
| C34 | 4.105139191  | -5.679141798  | 5.152609291  |
| C35 | 3.092701147  | -4.640022375  | 4.673903052  |
| C36 | 3.335370562  | -2.152843526  | 4.547403718  |
| C37 | 7.637446157  | -7.302470955  | 7.550588036  |
| C38 | 8.078740654  | -5.855617869  | 7.602362178  |
| C39 | -4.783916296 | -2.056801400  | -3.021412681 |
| C40 | -5.161645325 | -0.589811980  | -2.767194584 |
| C41 | -3.328618782 | -2.276259555  | -2.557147909 |
| C42 | -2.909824735 | -3.751668988  | -2.385020356 |
| C43 | -2.315569344 | -4.411187920  | -3.626784811 |
| C44 | -5.214250595 | 1.629861194   | -3.854690072 |
| C45 | -6.616740832 | 2.200476435   | -3.609310908 |
| C46 | -4.598899879 | 2.244551395   | -5.128529344 |
| C47 | -8.889256479 | 1.697159721   | -2.834151805 |
| C48 | -8.885511768 | 1.787512670   | -1.299615299 |
| C49 | -7.664685700 | 1.320037463   | 0.780877282  |
| C50 | -6.628778549 | 2.292704986   | 1.351172914  |
| C51 | -4.625632670 | 3.668518201   | 0.999362094  |
| C52 | -5.209702210 | 5.009728132   | 1.465418400  |
| C53 | -3.610181658 | 4.005748066   | -0.107212608 |
| C54 | -2.932922862 | 2.814396440   | -0.694943736 |
| C55 | -2.799897856 | 1.505711784   | -0.275417149 |
| C56 | -1.732823284 | 1.624114776   | -2.135753410 |
| C57 | -6.729502403 | 6.819728430   | 0.789638051  |
| C58 | -7.232891011 | 7.064129263   | 2.211069279  |
| C59 | -7.884497543 | 6.966448450   | -0.229555025 |
| C60 | -8.272577096 | 8.367856314   | -0.598447081 |
| C61 | -8.382667502 | 9.508601925   | 0.173751120  |
| C62 | -8.879251790 | 9.955723900   | -1.939622788 |
| C63 | 7.321784379  | 0.550821063   | 6.466132248  |
| C64 | 8.095009144  | -0.745190561  | 6.622717122  |
| C65 | 6.006970775  | 0.200453531   | 5.722941264  |
| C66 | 5.098918622  | 1.392643001   | 5.537680087  |
| C67 | 4.156051706  | 1.750734630   | 6.520040792  |
| C68 | 5.171634449  | 2.183173052   | 4.377712615  |
| C69 | 3.312481478  | 2.854197491   | 6.350754090  |
| C70 | 4.344482453  | 3.293784661   | 4.198516026  |
| C71 | 3.411086174  | 3.625419285   | 5.185300139  |
| C72 | 6.441526295  | 6.485281943   | 0.530626544  |
| C73 | 5.652963644  | 7.622220658   | -0.130144837 |
| C74 | 5.544344281  | 5.251741187   | 0.713413199  |
| C75 | 5.331305088  | 8.974853580   | -2.156196378 |
| C76 | 3.948992308  | 8.599883808   | -2.695106863 |
| C77 | 2.328779940  | 6.780579323   | -3.107172851 |
| C78 | 1.324462923  | 6.735441227   | -1.933900914 |
| C79 | 2.517883160  | 5.418639308   | -3.799345475 |
| C80 | 1.272770394  | 4.744437548   | -4.383047855 |
| C81 | 0.627108080  | 5.410519324   | -5.609076040 |
| C82 | -0.588759911 | 7.593892125   | -5.634420570 |
| C83 | 0.902311718  | 6.278317940   | 0.423293386  |
| C84 | 0.725642069  | 7.641159823   | 1.119602529  |
| C85 | 1.338233445  | 5.251884460   | 1.479688025  |
| C86 | 1.877036657  | 9.645425648   | 1.920693314  |
| C87 | 1.474804145  | 11.035673157  | 1.437610855  |
| C88 | 0.591593109  | 12.425181944  | -0.388460678 |
| C89 | -0.813930888 | 12.963164766  | -0.040167387 |
| C90 | 0.823076545  | 12.418126547  | -1.915385438 |

|       |              |               |              |
|-------|--------------|---------------|--------------|
| C91   | -0.124763085 | 11.459721066  | -2.628789897 |
| C92   | -3.063505087 | 12.413605454  | 0.779152483  |
| C93   | -3.179910494 | 13.470961602  | 1.869873609  |
| C94   | -3.850062449 | 11.140889137  | 1.195659626  |
| C95   | -3.890166341 | 10.112309962  | 0.088845985  |
| C96   | -4.848591252 | 10.209532595  | -0.931053193 |
| C97   | -2.938342617 | 9.081735287   | 0.010622397  |
| C98   | -4.847343403 | 9.324691635   | -2.012112732 |
| C99   | -2.905336132 | 8.203020675   | -1.076748668 |
| C100  | -3.859192283 | 8.340950723   | -2.083053883 |
| C101  | 6.245450623  | -4.485100731  | -7.442133590 |
| C102  | 4.771457715  | -4.123437641  | -7.361089066 |
| C103  | 3.132693164  | -2.468986313  | -6.495077968 |
| C104  | 2.914145935  | -1.109292529  | -7.169126311 |
| C105  | 3.402604465  | 1.286948908   | -7.045156246 |
| C106  | 4.586412232  | 2.220702296   | -6.814307240 |
| C107  | 6.713933585  | 2.677896270   | -5.689285999 |
| C108  | 7.936492970  | 2.424216341   | -6.550241401 |
| C109  | -0.140019331 | -3.551825315  | -9.526116658 |
| C110  | -1.108616115 | -2.362524229  | -9.546244990 |
| C111  | -0.144029363 | -4.200514036  | -8.122075309 |
| C112  | 0.500999213  | -5.599397517  | -8.147977778 |
| C113  | 0.761960375  | -6.092207810  | -6.741758443 |
| C114  | -1.493131677 | -0.012488229  | -8.992865438 |
| C115  | -0.742890635 | 1.221388968   | -9.453708636 |
| C116  | -2.260263210 | 0.155971321   | -7.659754509 |
| C117  | -1.325305912 | 0.062296286   | -6.487576403 |
| C118  | -0.581685550 | 1.175135729   | -6.064941477 |
| C119  | -1.076154227 | -1.188567091  | -5.895647258 |
| C120  | 0.430429705  | 1.019479928   | -5.114841838 |
| C121  | -0.063992804 | -1.339224172  | -4.946841494 |
| C122  | 0.714667591  | -0.238438869  | -4.581320159 |
| C123  | 8.253380386  | -7.062302789  | -1.910914549 |
| C124  | 9.055500035  | -7.290538034  | -0.619374323 |
| C125  | 6.775128837  | -7.461833825  | -1.770482939 |
| C126  | 5.885255295  | -7.098070615  | -2.920610348 |
| C127  | 5.876410852  | -7.657583689  | -4.183200672 |
| C128  | 4.195632821  | -6.227461911  | -4.000540660 |
| C129  | 9.570669867  | -8.678470468  | 1.310570675  |
| C130  | 11.063743974 | -8.592736907  | 1.084260773  |
| C131  | -0.109982105 | -6.913454058  | 0.201914940  |
| C132  | 1.242557484  | -6.792135343  | 0.851124360  |
| C133  | 2.425555066  | -7.157384870  | -0.131266214 |
| C134  | 2.249076453  | -8.616027005  | -0.646837822 |
| C135  | 3.461425601  | -9.101503074  | -1.458336069 |
| C136  | 3.465374605  | -10.578012868 | -1.731754257 |
| C137  | 3.729953567  | -7.139159578  | 0.718896382  |
| C138  | 4.110119504  | -1.138244427  | -1.031945286 |
| Fe139 | 4.630211111  | -2.427046965  | -2.433909638 |
| Fe140 | 2.467525633  | 0.140590662   | -0.512181461 |
| Fe141 | 5.306434166  | -0.038277832  | 0.202487773  |
| Fe142 | 4.657929783  | 0.183453865   | -2.317048040 |
| Fe143 | 4.514145647  | 2.332106360   | -0.705509466 |
| Fe144 | 4.971204218  | -2.557758014  | 0.124580300  |
| Fe145 | 2.585948473  | -2.352725134  | -0.821551753 |
| H146  | -6.651207816 | -6.632526429  | -1.692248229 |
| H147  | -6.261666820 | -5.720758262  | -2.987603594 |
| H148  | -9.918086709 | -3.659581653  | -2.175377351 |
| H149  | -8.537427235 | -5.152403964  | -3.405239719 |
| H150  | -9.031282548 | -6.259917135  | -2.127881692 |
| H151  | -8.402349784 | -1.773846898  | -0.730116613 |

|      |               |              |               |
|------|---------------|--------------|---------------|
| H152 | -10.375636410 | -4.440519217 | 0.617625871   |
| H153 | -10.178779628 | -1.830317981 | -0.820231758  |
| H154 | -10.659255453 | -5.079492160 | 2.840571379   |
| H155 | -7.974358729  | -5.188634658 | 1.423165082   |
| H156 | -10.352202434 | -3.397262505 | 3.338708758   |
| H157 | -3.814999935  | -2.219038394 | 2.147614627   |
| H158 | -6.213866016  | -3.461629588 | 1.156663732   |
| H159 | -5.927999519  | -6.140709656 | 2.038980601   |
| H160 | -6.567573642  | 0.584454518  | 4.791023635   |
| H161 | -7.286644045  | -1.620222605 | 3.035366568   |
| H162 | -6.350178630  | -5.993927345 | 3.764342403   |
| H163 | -5.076387094  | -1.445247535 | 1.163206784   |
| H164 | -7.358348195  | -2.899702438 | 5.477580837   |
| H165 | -8.119409166  | -0.290145908 | 4.740769239   |
| H166 | -1.806518868  | -3.749445378 | 3.728097670   |
| H167 | -1.106844780  | -2.894202802 | 2.331382009   |
| H168 | -0.055650914  | -3.405135572 | 3.666164625   |
| H169 | -2.293947383  | -1.300756435 | 3.835152896   |
| H170 | -7.519182411  | -3.907570202 | 7.545750597   |
| H171 | -2.888242927  | 1.962057589  | 4.257182701   |
| H172 | -4.520876130  | 0.155957976  | 8.013143233   |
| H173 | -4.137456151  | 3.604165815  | 8.104338136   |
| H174 | -0.355180681  | -0.491326870 | 2.527026998   |
| H175 | 0.757168442   | -0.928032066 | 3.827014953   |
| H176 | 7.057712669   | 0.904795132  | 7.480828446   |
| H177 | -3.710887900  | 3.531935721  | 4.391078364   |
| H178 | -4.402147820  | 4.469423458  | 6.573569801   |
| H179 | -2.023017573  | 3.365615913  | 4.934188324   |
| H180 | -2.759448036  | 4.337853432  | 7.250655873   |
| H181 | -4.470917531  | 1.999834632  | 6.214065483   |
| H182 | -1.518224011  | 2.030134273  | 7.038229390   |
| H183 | -3.122941208  | 0.031015772  | 5.631970118   |
| H184 | -0.434910337  | 0.374354026  | 4.074480895   |
| H185 | 1.600554931   | 4.306368447  | 0.974947246   |
| H186 | 0.472639996   | 5.072176733  | 2.135366218   |
| H187 | 2.409644113   | 5.363844756  | 3.125402449   |
| H188 | 1.946136853   | 4.804087596  | 5.667773451   |
| H189 | 4.392414230   | 3.876100219  | 3.278050483   |
| H190 | 5.861202359   | 1.906380353  | 3.576942791   |
| H191 | 4.070278086   | 1.154356120  | 7.432055953   |
| H192 | -3.293282812  | -2.453562518 | 5.875362368   |
| H193 | -3.314409250  | -5.619309234 | 6.436313534   |
| H194 | -3.295789984  | -5.000118680 | 8.103164926   |
| H195 | -5.005022736  | -4.021365306 | 5.879684381   |
| H196 | -7.059545324  | -2.382213547 | 8.341792469   |
| H197 | 2.573195717   | 3.105896448  | 7.115398237   |
| H198 | -0.324225096  | -2.300584528 | 5.948117739   |
| H199 | -4.832031473  | 1.264108039  | 10.549157201  |
| H200 | -5.123547535  | -0.449247591 | 10.144644812  |
| H201 | -2.430887555  | -0.666920005 | 10.547464398  |
| H202 | 8.517392930   | -7.949315955 | 7.413368807   |
| H203 | -0.856735455  | -5.731249756 | -4.206367214  |
| H204 | -0.208911329  | -8.702861092 | 0.916271639   |
| H205 | -0.181882471  | -6.307573185 | -8.639475524  |
| H206 | 1.441514043   | -5.573541866 | -8.717187742  |
| H207 | -1.174653431  | -4.291683223 | -7.746357077  |
| H208 | 0.122611082   | 1.011195196  | -10.126099899 |
| H209 | -0.595689332  | -4.271538151 | -10.223609780 |
| H210 | -2.652590306  | -1.770599532 | -3.263454845  |
| H211 | -3.778743792  | -4.362477284 | -2.081285269  |
| H212 | 0.313933666   | -1.125392276 | -8.674930099  |

|      |              |              |               |
|------|--------------|--------------|---------------|
| H213 | -2.251993069 | -0.168709436 | -9.786675741  |
| H214 | 1.708576138  | -2.613672980 | -9.413879554  |
| H215 | -0.908197249 | -5.415819763 | -2.474065548  |
| H216 | 0.386577829  | -3.539307902 | -7.420146942  |
| H217 | 1.719233470  | -4.033305108 | -10.247504018 |
| H218 | -5.877160268 | -2.791914416 | -4.614683065  |
| H219 | -3.190956699 | -1.759780750 | -1.597734919  |
| H220 | 2.630097394  | -5.507477816 | -6.953692453  |
| H221 | -2.188338265 | -3.824943138 | -1.558832034  |
| H222 | -4.122008293 | 3.217527653  | 1.866477237   |
| H223 | -3.186419254 | 1.056362202  | 0.637135028   |
| H224 | -8.632387462 | 1.621350907  | 1.201009486   |
| H225 | -7.046128498 | 0.816056660  | -1.199069821  |
| H226 | -6.605217272 | 4.840419278  | -0.021325083  |
| H227 | -8.206657544 | 9.697879809  | 1.226234512   |
| H228 | -7.705392756 | 6.165861389  | 2.679329779   |
| H229 | -8.756253098 | 6.392254061  | 0.132044503   |
| H230 | -5.931622482 | 7.547330357  | 0.569730972   |
| H231 | -9.169324907 | 10.533677340 | -2.813575039  |
| H232 | -2.873739368 | 4.696779865  | 0.335848819   |
| H233 | -4.127411782 | 4.572433909  | -0.900827662  |
| H234 | -8.930585334 | 11.479269022 | -0.451978240  |
| H235 | -7.561803322 | 6.478368334  | -1.162964059  |
| H236 | -5.473188651 | 2.258602958  | -0.358875793  |
| H237 | -7.444463888 | 0.314983908  | 1.170887687   |
| H238 | -9.189749696 | 2.681458558  | -3.213997949  |
| H239 | -1.119591335 | 1.395565252  | -3.004538782  |
| H240 | -9.659592433 | 0.974494032  | -3.135740215  |
| H241 | 8.848653956  | 1.906755288  | 6.284508413   |
| H242 | 7.540921296  | 2.268691333  | 5.371426204   |
| H243 | 2.722506528  | 5.844896704  | -0.671127591  |
| H244 | -0.096246213 | 5.988389004  | 0.066191922   |
| H245 | 2.624244989  | 8.199811668  | 0.576501575   |
| H246 | -2.181290434 | 3.704320714  | -2.502909593  |
| H247 | -3.299255759 | 4.627603961  | -4.290260366  |
| H248 | -3.156513172 | 5.908120257  | -3.377491681  |
| H249 | -3.568243328 | 1.881600252  | -5.240010627  |
| H250 | -5.181941433 | 1.931632484  | -6.012170326  |
| H251 | 1.877019426  | 12.164597682 | -2.103210852  |
| H252 | 0.631119782  | 13.432906507 | -2.288114633  |
| H253 | 1.398366835  | 10.025827747 | -2.905290602  |
| H254 | -0.228691855 | 9.546319669  | -3.339054835  |
| H255 | 0.120045771  | 9.132733133  | -6.786148674  |
| H256 | 0.205742595  | 4.640754053  | -6.273347024  |
| H257 | -5.610401192 | 9.403356313  | -2.790014157  |
| H258 | -2.202613221 | 8.941390744  | 0.807985707   |
| H259 | -2.180186301 | 7.970957260  | -4.383569519  |
| H260 | 2.967027829  | 4.712715156  | -3.082923996  |
| H261 | 4.274649489  | 6.615131975  | -2.242924464  |
| H262 | 0.511100545  | 4.581511588  | -3.605285517  |
| H263 | -7.399254785 | 0.329496195  | -3.546648991  |
| H264 | 5.956224798  | 9.271274567  | -3.010057661  |
| H265 | -4.930390659 | -0.360679437 | -4.737525808  |
| H266 | 3.256018963  | 5.565791689  | -4.605610199  |
| H267 | -2.122429265 | 7.447294122  | -1.156061412  |
| H268 | -5.402869120 | 3.932993509  | -4.590655876  |
| H269 | 5.185166404  | 9.859883163  | -1.521896939  |
| H270 | 0.757335702  | 7.577256362  | -7.191599061  |
| H271 | -1.873205085 | 9.178436907  | -5.572241417  |
| H272 | -4.234345757 | -3.081347625 | -4.717666446  |
| H273 | -5.442918207 | -2.644152596 | -2.354000796  |

|      |              |               |              |
|------|--------------|---------------|--------------|
| H274 | -5.613107828 | 10.988408036  | -0.885598067 |
| H275 | -4.617652237 | 1.982609112   | -2.995099809 |
| H276 | 1.909629957  | 7.512493652   | -3.809755224 |
| H277 | 1.391619375  | 5.945312164   | -6.188263033 |
| H278 | 1.597996054  | 3.742876531   | -4.692683248 |
| H279 | -1.227422738 | 5.928812979   | -4.669858791 |
| H280 | 1.263358144  | 9.436566002   | 2.809916732  |
| H281 | 0.877177382  | 10.283824321  | -0.375766686 |
| H282 | 1.285312130  | 13.153089891  | 0.056952961  |
| H283 | 2.925281937  | 9.714622125   | 2.242297684  |
| H284 | -1.362528557 | 11.116341283  | 0.632239167  |
| H285 | 6.857867172  | -3.572005946  | -7.426662474 |
| H286 | 6.469312774  | -5.036747441  | -6.505217734 |
| H287 | 8.308706385  | -5.980619074  | -2.100434603 |
| H288 | 7.434808341  | -5.687291290  | -8.581671093 |
| H289 | 5.833347104  | -6.003582684  | -8.729959481 |
| H290 | 6.156993883  | 4.447746288   | 1.142704320  |
| H291 | 6.212234475  | 7.272206683   | 2.398128899  |
| H292 | 6.730907794  | 7.384495112   | -1.865778165 |
| H293 | 4.727109563  | 5.494492347   | 1.407985917  |
| H294 | 7.648775622  | 7.649409496   | 1.714638437  |
| H295 | 6.987516143  | 2.560504419   | -4.629247412 |
| H296 | 7.291401102  | 6.208491766   | -0.113611383 |
| H297 | 2.773089113  | -6.930142368  | 6.338184664  |
| H298 | 5.015227387  | -8.320160687  | 4.774487403  |
| H299 | 5.537599966  | 0.920049304   | -5.490904575 |
| H300 | 3.561114930  | -0.178934043  | 4.060857611  |
| H301 | 3.226478688  | 1.244996466   | -8.128149749 |
| H302 | 0.117671566  | -2.307421799  | -4.473346139 |
| H303 | 2.520758706  | 1.779925098   | -6.602838968 |
| H304 | 2.361281303  | -4.415830596  | 5.460451290  |
| H305 | 3.918188784  | -0.267228881  | -5.610862525 |
| H306 | 2.523607354  | -5.036083267  | 3.815711828  |
| H307 | 2.793493938  | -7.313818238  | 4.602255850  |
| H308 | 4.861325701  | -5.810271167  | 4.364374456  |
| H309 | 4.625399103  | -5.293729888  | 6.043561341  |
| H310 | -3.023089690 | -0.634717522  | -7.611277116 |
| H311 | 3.059180377  | -9.460553719  | 6.739779881  |
| H312 | 2.246167919  | -11.888965592 | 5.036836434  |
| H313 | 1.498160898  | -0.343793419  | -3.831669205 |
| H314 | 2.936867148  | -11.730706186 | 7.868811627  |
| H315 | 1.474670769  | -11.945900379 | 7.161139338  |
| H316 | 4.293441608  | -3.476689703  | 3.380546936  |
| H317 | 1.013329635  | 1.870674671   | -4.760174524 |
| H318 | -1.681018661 | -2.052199745  | -6.184443161 |
| H319 | 6.550979301  | -10.642022980 | 1.125030694  |
| H320 | 6.718756744  | -8.556640450  | -1.633156770 |
| H321 | 5.313974953  | -8.759667093  | 2.063538615  |
| H322 | 6.079616330  | -11.300645753 | -0.188463033 |
| H323 | 7.768202261  | 1.756022393   | -7.429283296 |
| H324 | 5.708651722  | -5.643092053  | 1.666448738  |
| H325 | 1.310971417  | -7.424825940  | 1.748621658  |
| H326 | 5.229151882  | -2.456006311  | -6.254808748 |
| H327 | 2.104257347  | -9.278110182  | 0.221381114  |
| H328 | 4.498110010  | -7.314589664  | -5.787557030 |
| H329 | 3.308852029  | -5.665645672  | -4.263264622 |
| H330 | 3.652105131  | -12.619443079 | 5.821026628  |
| H331 | 4.243425746  | -1.283871415  | 2.903450794  |
| H332 | 7.140826985  | -6.577453684  | 3.345763143  |
| H333 | 6.588795381  | -4.417354746  | 2.041992224  |
| H334 | 6.909505440  | -7.517039403  | 5.535660893  |

|       |              |               |              |
|-------|--------------|---------------|--------------|
| H335  | 2.620881311  | -2.598424826  | 6.419864724  |
| H336  | 2.461537761  | -11.967236044 | -2.528606702 |
| H337  | 3.483656549  | -8.567727851  | -2.420305319 |
| H338  | 4.397681182  | -8.884335100  | -0.933475039 |
| H339  | 1.348328004  | -8.661457659  | -1.275545033 |
| H340  | 2.967866499  | -2.396536121  | -5.408893032 |
| H341  | -0.781585572 | 2.155630375   | -6.505533924 |
| H342  | -2.774935902 | 1.128362084   | -7.698602979 |
| H343  | 1.389030950  | -5.741107335  | 1.134010523  |
| H344  | 7.034532962  | -8.128680363  | 3.299732255  |
| H345  | 5.592078978  | -9.862595556  | 3.121091255  |
| H346  | 2.315129562  | -0.987732994  | 5.900968708  |
| H347  | 6.523254831  | -8.398097877  | -4.640888031 |
| H348  | 6.368480392  | -7.004263030  | -0.859959530 |
| H349  | 2.423991211  | -3.177724059  | -6.926840899 |
| H350  | 6.408093616  | 3.725464905   | -5.846368067 |
| H351  | 5.494773256  | -0.576238519  | 6.311564232  |
| H352  | 6.265825108  | -0.233104260  | 4.743526013  |
| H353  | 9.851276250  | -7.394079440  | -3.153165669 |
| H354  | 8.987159157  | -8.747513511  | -2.839155129 |
| H355  | 9.351440360  | -9.709643735  | 1.630156079  |
| H356  | 8.061160989  | -9.069043924  | -0.142082415 |
| H357  | 11.393348809 | -8.818601810  | 0.042109602  |
| H358  | 9.275160387  | -8.005788944  | 2.132176755  |
| H359  | 8.666102311  | -1.049625679  | 5.712899437  |
| H360  | -2.303466217 | 13.539928432  | 2.556852230  |
| H361  | 7.189341267  | -7.536054931  | 8.532768445  |
| H362  | 7.325800594  | -5.113960308  | 7.238054483  |
| H363  | -3.519503345 | 12.832222082  | -0.133367575 |
| H364  | -3.393179320 | 10.715604279  | 2.103141086  |
| H365  | -4.868946630 | 11.459332355  | 1.459279479  |
| H366  | -4.561418061 | 7.614141871   | -3.748083202 |
| H367  | 2.313255292  | -1.152918208  | 0.476264216  |
| Mo368 | 3.937180227  | -4.733908515  | -1.127228092 |
| N369  | -6.993423303 | -6.325538825  | -2.606344980 |
| N370  | -9.245017858 | -3.589162541  | -1.416145581 |
| N371  | -9.947264504 | -3.844207185  | 1.321512077  |
| N372  | -7.743625760 | -5.191100680  | 2.416487260  |
| N373  | -5.635335162 | -3.278122624  | 1.978059420  |
| N374  | -6.592725789 | -1.172239228  | 3.638579186  |
| N375  | -6.924409063 | -2.392263265  | 6.252933058  |
| N376  | -4.644416180 | -4.049994099  | 6.838530277  |
| N377  | -2.332760760 | -2.687915632  | 6.116659658  |
| N378  | -2.392419111 | 0.291919952   | 6.297171932  |
| N379  | -3.929308901 | 0.527157938   | 8.760191496  |
| N380  | 2.351121522  | -11.427816397 | 7.087592974  |
| N381  | 3.704864642  | -9.408568641  | 5.944563205  |
| N382  | 3.746348671  | -3.396447970  | 4.242537710  |
| N383  | 2.587235052  | -1.934444522  | 5.653378523  |
| N384  | 3.634284417  | -1.138446007  | 3.731780608  |
| N385  | 6.630808496  | -7.562461686  | 6.540382620  |
| N386  | -4.953551771 | -2.388452844  | -4.442695506 |
| N387  | -1.286769521 | -5.255869702  | -3.408844192 |
| N388  | -5.147716650 | 0.182257787   | -3.886986456 |
| N389  | -7.619750274 | 1.314978216   | -3.424089144 |
| N390  | -7.795363602 | 1.276145359   | -0.664699460 |
| N391  | -5.674394978 | 2.777351621   | 0.496356048  |
| N392  | -2.241345095 | 2.875956786   | -1.893769789 |
| N393  | -2.062443639 | 0.773359862   | -1.175789131 |
| N394  | -6.229429823 | 5.461463824   | 0.691505014  |
| N395  | -8.585089570 | 8.661581999   | -1.916908254 |

|      |              |               |               |
|------|--------------|---------------|---------------|
| N396 | -8.767743490 | 10.506190177  | -0.696867550  |
| N397 | 8.128888060  | 1.492314369   | 5.687509365   |
| N398 | 6.980507049  | 6.883526204   | 1.841080948   |
| N399 | 6.017261229  | 7.943190524   | -1.404869656  |
| N400 | 3.636374466  | 7.287448839   | -2.697035902  |
| N401 | -0.462882503 | 6.327798274   | -5.254826485  |
| N402 | 0.238047164  | 8.155327079   | -6.540456484  |
| N403 | -1.517209655 | 8.386790757   | -5.042090756  |
| N404 | 1.799077185  | 6.319313596   | -0.728144920  |
| N405 | 1.747132690  | 8.538977759   | 0.983434675   |
| N406 | 0.896855939  | 11.125124619  | 0.202618417   |
| N407 | 0.394346681  | 10.242656863  | -2.931245206  |
| N408 | -1.671530801 | 12.079306370  | 0.525628302   |
| N409 | 6.517342850  | -5.243672202  | -8.667176710  |
| N410 | 4.482198168  | -2.965066345  | -6.739737442  |
| N411 | 3.514576671  | -0.073079310  | -6.550800290  |
| N412 | 5.599531141  | 1.804780774   | -6.010281636  |
| N413 | 1.172111200  | -3.186843577  | -10.077220928 |
| N414 | -0.634877075 | -1.181467856  | -9.060413502  |
| N415 | 8.896005868  | -7.748192753  | -3.049080862  |
| N416 | 4.823467062  | -6.198993877  | -2.827665649  |
| N417 | 4.807242308  | -7.094371951  | -4.845143366  |
| N418 | 8.818537081  | -8.427813173  | 0.091692546   |
| N419 | 0.340259189  | 1.689334402   | 0.791152553   |
| N420 | 1.135851987  | 1.076371874   | 0.274200476   |
| O421 | -7.279932411 | -4.346765599  | -0.548457962  |
| O422 | -8.787065881 | -1.930852734  | 1.744521018   |
| O423 | -8.333813163 | -4.416532701  | 4.485459579   |
| O424 | -4.727397210 | -4.081365994  | 3.903664548   |
| O425 | -4.423617120 | -0.562752088  | 3.952663720   |
| O426 | -6.235351835 | -0.378310753  | 7.084309740   |
| O427 | -5.100399172 | -3.778282469  | 9.071822840   |
| O428 | -0.995297485 | -4.341184408  | 6.994623206   |
| O429 | -0.311948391 | -0.146599498  | 7.130051040   |
| O430 | -2.240616948 | 1.895938495   | 9.410404689   |
| O431 | -3.238162729 | 0.114714634   | 12.251415483  |
| O432 | 4.666122487  | -10.772076178 | 4.343570143   |
| O433 | 4.936056524  | -7.953153628  | 8.044870752   |
| O434 | 9.165706101  | -5.501967575  | 8.031552714   |
| O435 | -5.465545966 | -0.159013003  | -1.635684536  |
| O436 | -2.765967987 | -4.202457161  | -4.775901551  |
| O437 | -6.777913756 | 3.437569213   | -3.538718199  |
| O438 | -4.557890077 | 3.677082517   | -5.046460982  |
| O439 | -9.858051382 | 2.293110269   | -0.722343086  |
| O440 | -6.692809321 | 2.630955356   | 2.537134250   |
| O441 | -4.713161592 | 5.668925045   | 2.385379858   |
| O442 | -7.183789584 | 8.136054501   | 2.791099309   |
| O443 | 8.095939558  | -1.428597717  | 7.636503277   |
| O444 | 2.600560945  | 4.718687605   | 4.950237541   |
| O445 | 4.747272337  | 8.235259320   | 0.464244273   |
| O446 | 3.205543749  | 9.504812787   | -3.129882707  |
| O447 | 0.146496151  | 7.090510538   | -2.113404908  |
| O448 | -0.284539431 | 7.862979769   | 1.800941639   |
| O449 | 2.445468888  | 5.761399689   | 2.231806654   |
| O450 | 1.655406611  | 12.019337480  | 2.167527102   |
| O451 | -1.111012824 | 14.147001198  | -0.253843789  |
| O452 | -1.310414444 | 11.761459214  | -2.840089609  |
| O453 | -4.171345271 | 14.168429665  | 2.016498493   |
| O454 | -3.778778512 | 7.472568944   | -3.181510833  |
| O455 | 3.900951174  | -4.903531669  | -7.827522703  |
| O456 | 2.252382558  | -0.998324975  | -8.225449173  |

|  |                             |              |               |              |
|--|-----------------------------|--------------|---------------|--------------|
|  | O457                        | 4.566704518  | 3.340531654   | -7.353514496 |
|  | O458                        | 9.031533406  | 2.912252757   | -6.319658353 |
|  | O459                        | -2.274006960 | -2.490429674  | -9.961963232 |
|  | O460                        | -0.104290688 | -6.572973115  | -6.017675230 |
|  | O461                        | 2.018260428  | -5.936748344  | -6.276155907 |
|  | O462                        | -1.066715397 | 2.368626671   | -9.182399143 |
|  | O463                        | 9.963559718  | -6.508795242  | -0.278479281 |
|  | O464                        | 11.871509450 | -8.381485910  | 1.977807244  |
|  | O465                        | -0.662670421 | -6.048947094  | -0.460569923 |
|  | O466                        | -0.757307966 | -8.113868908  | 0.363615192  |
|  | O467                        | 4.360604352  | -11.359829197 | -1.415565562 |
|  | O468                        | 2.358352233  | -11.000523252 | -2.397157755 |
|  | O469                        | 4.639019618  | -6.306306106  | 0.325818254  |
|  | O470                        | 3.868572366  | -7.933045183  | 1.677863420  |
|  | O471                        | 2.476693534  | -6.250996329  | -1.169622731 |
|  | O472                        | 7.452937420  | -7.390785345  | 3.817735181  |
|  | O473                        | 6.238108705  | -5.253005169  | 2.408011992  |
|  | O474                        | -2.642365786 | 5.180071060   | -3.789722001 |
|  | O475                        | 6.855569735  | -11.253897270 | 0.407662531  |
|  | O476                        | 6.046611048  | -9.350747296  | 2.402715878  |
|  | S477                        | 4.779562886  | 4.664572927   | -0.867797105 |
|  | S478                        | 2.921858049  | 1.682823697   | -2.279822087 |
|  | S479                        | 2.685606695  | -3.544692760  | -2.725632113 |
|  | S480                        | 3.817110220  | 1.300653613   | 1.155287090  |
|  | S481                        | 0.931173190  | -1.190230369  | -1.567509525 |
|  | S482                        | 5.346538480  | -1.084161372  | -4.070134127 |
|  | S483                        | 3.153636157  | -3.676794795  | 0.869650217  |
|  | S484                        | 6.448073544  | 1.201298068   | -1.257578848 |
|  | S485                        | 6.110377774  | -3.761327796  | -1.358392261 |
|  | S486                        | 6.186334498  | -1.512438317  | 1.630087658  |
|  | <b>11u</b>                  |              |               |              |
|  | Fe1                         | 2.93         |               |              |
|  | Fe2                         | -1.13        |               |              |
|  | Fe3                         | -2.27        |               |              |
|  | Fe4                         | 2.94         |               |              |
|  | Fe5                         | -2.40        |               |              |
|  | Fe6                         | -0.87        |               |              |
|  | Fe7                         | 2.26         |               |              |
|  | S=1                         |              |               |              |
|  | bmlcnx2b262n2x351ud2b.car_1 |              |               |              |
|  | C1                          | -8.281144934 | -4.448251802  | -0.133540272 |
|  | C2                          | -8.362602276 | -5.788732594  | -0.871162411 |
|  | C3                          | -9.308178075 | -2.239898660  | 0.193948142  |
|  | C4                          | -9.330191953 | -2.164865424  | 1.719092895  |
|  | C5                          | -9.995168015 | -3.205039175  | 3.825993624  |
|  | C6                          | -8.620572119 | -3.475584402  | 4.449692090  |
|  | C7                          | -6.413033680 | -4.498039485  | 4.147151633  |
|  | C8                          | -5.516427980 | -3.266782653  | 3.984806072  |
|  | C9                          | -4.881908608 | -1.353297009  | 2.613126185  |
|  | C10                         | -5.223431500 | -0.240229075  | 3.614534447  |
|  | C11                         | -6.935631045 | 0.916536637   | 4.894909687  |
|  | C12                         | -6.566584864 | 0.596454259   | 6.349767649  |
|  | C13                         | -6.690516120 | -1.031346181  | 8.174908782  |
|  | C14                         | -5.313659048 | -1.528393231  | 8.630959034  |
|  | C15                         | -3.286150598 | -2.787135289  | 8.033399043  |
|  | C16                         | -2.030311270 | -2.103093715  | 7.485771429  |
|  | C17                         | -1.164518910 | -0.383469432  | 5.920604439  |
|  | C18                         | -1.132725856 | 1.095010398   | 6.346907996  |
|  | C19                         | -1.217484779 | -0.597154075  | 4.383279823  |
|  | C20                         | -0.190150906 | 0.266771837   | 3.643340004  |
|  | C21                         | -1.023743286 | -2.079712304  | 4.043645012  |
|  | C22                         | -2.330958057 | 3.243543609   | 6.463930270  |
|  | C23                         | -2.664896756 | 3.391571243   | 7.961345168  |
|  | C24                         | -3.316990517 | 4.022532202   | 5.559838507  |
|  | C25                         | -3.489578744 | 5.466465288   | 6.046736625  |
|  | C26                         | -2.848144157 | 4.006013743   | 4.099369441  |
|  | C27                         | -4.135844872 | 2.854799743   | 9.813617541  |
|  | C28                         | -2.994779940 | 2.638645754   | 10.786968729 |
|  | C29                         | 2.923226927  | -10.042829965 | 8.375514509  |



|     |              |              |              |
|-----|--------------|--------------|--------------|
| C30 | 3.814342804  | -9.078197290 | 7.591349708  |
| C31 | 4.414255422  | -6.660464925 | 7.383362262  |
| C32 | 5.384482456  | -6.120581725 | 8.451157716  |
| C33 | 3.432297004  | -5.575493737 | 6.905946228  |
| C34 | 4.121552143  | -4.365771172 | 6.269597677  |
| C35 | 3.108857570  | -3.459026471 | 5.571022075  |
| C36 | 3.391603347  | -1.072891454 | 4.875466655  |
| C37 | 7.691444280  | -5.449087419 | 8.923760453  |
| C38 | 8.158054089  | -4.043612675 | 8.613206910  |
| C39 | -4.870888216 | -2.631880400 | -2.363528598 |
| C40 | -5.237325723 | -1.141973428 | -2.449859476 |
| C41 | -3.408968119 | -2.755030204 | -1.890800452 |
| C42 | -2.999233311 | -4.147314345 | -1.370864986 |
| C43 | -2.471529729 | -5.119131900 | -2.421074207 |
| C44 | -5.261823758 | 0.765320976  | -4.026062267 |
| C45 | -6.644954907 | 1.415830533  | -3.901119432 |
| C46 | -4.657104894 | 1.044848682  | -5.417343815 |
| C47 | -8.911693071 | 1.180813243  | -2.998329005 |
| C48 | -8.877688401 | 1.644671720  | -1.533982004 |
| C49 | -7.638076779 | 1.674102410  | 0.587444212  |
| C50 | -6.577072092 | 2.736306227  | 0.889968153  |
| C51 | -4.544151268 | 3.926321184  | 0.196508198  |
| C52 | -5.067952755 | 5.363615245  | 0.317365516  |
| C53 | -3.524136682 | 3.939381426  | -0.956241040 |
| C54 | -2.927523215 | 2.603848315  | -1.247473247 |
| C55 | -2.855192209 | 1.426700434  | -0.529521522 |
| C56 | -1.850640843 | 1.029532837  | -2.383924393 |
| C57 | -6.553429212 | 7.004735766  | -0.750703410 |
| C58 | -7.018060664 | 7.592090734  | 0.582838435  |
| C59 | -7.730015790 | 6.937627193  | -1.752072303 |
| C60 | -8.108614854 | 8.219526419  | -2.430508539 |
| C61 | -8.180372023 | 9.513145012  | -1.951802539 |
| C62 | -8.748764180 | 9.450370574  | -4.093060345 |
| C63 | 7.501190916  | 1.891484948  | 6.012421285  |
| C64 | 8.266335417  | 0.654336996  | 6.444320494  |
| C65 | 6.163984085  | 1.406069456  | 5.397965754  |
| C66 | 5.271212255  | 2.543046782  | 4.957256373  |
| C67 | 4.353264811  | 3.137990075  | 5.842108778  |
| C68 | 5.334218389  | 3.041234690  | 3.643058712  |
| C69 | 3.525375865  | 4.189062224  | 5.433443565  |
| C70 | 4.523354050  | 4.096870851  | 3.224425392  |
| C71 | 3.613884026  | 4.665583984  | 4.119385965  |
| C72 | 6.572907155  | 6.259421862  | -1.144032978 |
| C73 | 5.780963692  | 7.220148234  | -2.040797285 |
| C74 | 5.660875676  | 5.123860211  | -0.660264785 |
| C75 | 5.440419564  | 8.059188745  | -4.329143083 |
| C76 | 4.039471217  | 7.601528804  | -4.738715786 |
| C77 | 2.370064407  | 5.780786931  | -4.671971697 |
| C78 | 1.391117796  | 6.046055971  | -3.507140037 |
| C79 | 2.516296393  | 4.288995204  | -5.024360798 |
| C80 | 1.247571635  | 3.518681185  | -5.403696021 |
| C81 | 0.583657586  | 3.891258416  | -6.740213067 |
| C82 | -0.576637700 | 6.040297604  | -7.262540592 |
| C83 | 1.010506133  | 6.181744564  | -1.101946279 |
| C84 | 0.891426339  | 7.677055375  | -0.746828684 |
| C85 | 1.435602524  | 5.421638597  | 0.162793040  |
| C86 | 2.106793852  | 9.780825417  | -0.479460515 |
| C87 | 1.713138796  | 11.024058592 | -1.270903128 |
| C88 | 0.810501370  | 11.960014902 | -3.357221929 |
| C89 | -0.574504227 | 12.598892732 | -3.128153562 |
| C90 | 1.006351041  | 11.582450625 | -4.841951797 |

|       |              |               |              |
|-------|--------------|---------------|--------------|
| C91   | 0.030236110  | 10.499664614  | -5.288491451 |
| C92   | -2.815576464 | 12.320699702  | -2.167017802 |
| C93   | -2.882229832 | 13.606118336  | -1.352763462 |
| C94   | -3.624889604 | 11.205047033  | -1.454004352 |
| C95   | -3.704964960 | 9.947243920   | -2.285882446 |
| C96   | -4.679887997 | 9.817375734   | -3.285755002 |
| C97   | -2.773340950 | 8.909197906   | -2.124312214 |
| C98   | -4.714926953 | 8.696784804   | -4.117476849 |
| C99   | -2.779368043 | 7.790506528   | -2.961440602 |
| C100  | -3.750213355 | 7.702357917   | -3.957656665 |
| C101  | 5.987182730  | -6.297968426  | -6.248010650 |
| C102  | 4.524254590  | -5.883811026  | -6.238564757 |
| C103  | 2.947439892  | -4.029397746  | -5.742443876 |
| C104  | 2.735672427  | -2.864794561  | -6.717396138 |
| C105  | 3.263611056  | -0.515623748  | -7.173387507 |
| C106  | 4.481991617  | 0.400700100   | -7.218781846 |
| C107  | 6.652402674  | 1.066529368   | -6.309682761 |
| C108  | 7.855169689  | 0.585261309   | -7.096939337 |
| C109  | -0.419454953 | -5.721207550  | -8.393007780 |
| C110  | -1.361482679 | -4.547179141  | -8.682906349 |
| C111  | -0.407952724 | -6.017161565  | -6.874975890 |
| C112  | 0.196949176  | -7.403147173  | -6.583487043 |
| C113  | 0.489576156  | -7.564447920  | -5.109212742 |
| C114  | -1.668753389 | -2.119747225  | -8.725473845 |
| C115  | -0.897795593 | -1.053469220  | -9.479298909 |
| C116  | -2.369497319 | -1.614052112  | -7.439360387 |
| C117  | -1.426291384 | -1.485900638  | -6.270520744 |
| C118  | -0.644438047 | -0.330799175  | -6.091598752 |
| C119  | -1.260653057 | -2.555204075  | -5.371932328 |
| C120  | 0.297506455  | -0.265681899  | -5.058820926 |
| C121  | -0.318260064 | -2.487895988  | -4.340354890 |
| C122  | 0.474192550  | -1.345784566  | -4.188494468 |
| C123  | 8.057521313  | -7.498190506  | -0.323764303 |
| C124  | 8.886608512  | -7.433185177  | 0.968349828  |
| C125  | 6.575184369  | -7.803802187  | -0.059266822 |
| C126  | 5.667646828  | -7.718846671  | -1.248064206 |
| C127  | 5.620187627  | -8.576581822  | -2.328423208 |
| C128  | 3.965637240  | -7.112832262  | -2.477276009 |
| C129  | 9.425731815  | -8.338491833  | 3.160037258  |
| C130  | 10.913338123 | -8.346502372  | 2.891048938  |
| C131  | -0.267919465 | -6.689790601  | 1.874520619  |
| C132  | 1.106376318  | -6.391681542  | 2.409015183  |
| C133  | 2.267271309  | -7.009070577  | 1.528687010  |
| C134  | 2.059616280  | -8.547189826  | 1.394299903  |
| C135  | 3.242628046  | -9.244409684  | 0.703125031  |
| C136  | 3.208403534  | -10.743180451 | 0.791828301  |
| C137  | 3.587488769  | -6.805156858  | 2.337066746  |
| C138  | 4.077111225  | -1.429252101  | -0.816728280 |
| Fe139 | 4.584167861  | -3.032563013  | -1.902551308 |
| Fe140 | 2.824734119  | 0.144553425   | -0.660587829 |
| Fe141 | 5.304882560  | -0.131366765  | 0.101552131  |
| Fe142 | 4.825723466  | -0.519549465  | -2.430212077 |
| Fe143 | 4.682394172  | 1.969476067   | -1.381633197 |
| Fe144 | 4.893589872  | -2.562757286  | 0.631363419  |
| Fe145 | 2.471516620  | -2.527507923  | -0.393626345 |
| H146  | -6.798311164 | -6.686258396  | 0.082326055  |
| H147  | -6.416001595 | -6.120139308  | -1.399099178 |
| H148  | -9.992328910 | -3.813207627  | -1.079358838 |
| H149  | -8.683381679 | -5.608713880  | -1.909379689 |
| H150  | -9.178368597 | -6.360421574  | -0.395720163 |
| H151  | -8.410041674 | -1.693982766  | -0.128276654 |

|      |               |              |               |
|------|---------------|--------------|---------------|
| H152 | -10.420892775 | -3.902317472 | 1.832875974   |
| H153 | -10.189800257 | -1.708073300 | -0.188715979  |
| H154 | -10.690188032 | -3.992571168 | 4.145216107   |
| H155 | -8.039554391  | -4.499605877 | 2.768788552   |
| H156 | -10.344171182 | -2.248245973 | 4.235944876   |
| H157 | -3.806354677  | -1.549197895 | 2.708034134   |
| H158 | -6.241535116  | -2.937399239 | 2.077563510   |
| H159 | -6.007415205  | -5.330476492 | 3.556038835   |
| H160 | -6.464182916  | 1.875058771  | 4.643885970   |
| H161 | -7.246252912  | -0.669192004 | 3.473530634   |
| H162 | -6.387811850  | -4.778159330 | 5.207137460   |
| H163 | -5.075725662  | -1.002041554 | 1.589358948   |
| H164 | -7.292640938  | -1.332948933 | 6.148955421   |
| H165 | -8.026036464  | 1.036830896  | 4.829433693   |
| H166 | -1.790339596  | -2.710981384 | 4.516472563   |
| H167 | -1.073111179  | -2.230903219 | 2.954481757   |
| H168 | -0.034232432  | -2.430699723 | 4.377883070   |
| H169 | -2.221737371  | -0.291354736 | 4.048402106   |
| H170 | -7.413186809  | -1.830570351 | 8.395711883   |
| H171 | -2.759923572  | 2.986095520  | 3.700131453   |
| H172 | -4.343144651  | 2.162368196  | 7.805962025   |
| H173 | -3.889155189  | 5.522060286  | 7.069420091   |
| H174 | -0.281529699  | 0.112791628  | 2.558460119   |
| H175 | 0.836676836   | -0.012328449 | 3.920532529   |
| H176 | 7.266479626   | 2.477211613  | 6.922201532   |
| H177 | -3.563531667  | 4.556839446  | 3.471589587   |
| H178 | -4.183431350  | 6.002017724  | 5.382838634   |
| H179 | -1.865593421  | 4.497002589  | 4.004482534   |
| H180 | -2.524451181  | 5.997746732  | 6.031991477   |
| H181 | -4.298992543  | 3.518053703  | 5.617748726   |
| H182 | -1.328375936  | 3.684015507  | 6.357726267   |
| H183 | -2.994819126  | 1.436819414  | 5.501816810   |
| H184 | -0.321977542  | 1.340287504  | 3.845957218   |
| H185 | 1.646688289   | 4.371585830  | -0.105682218  |
| H186 | 0.580189886   | 5.441160812  | 0.856026296   |
| H187 | 2.566690930   | 5.866785162  | 1.710462641   |
| H188 | 2.167638612   | 5.942817189  | 4.327735124   |
| H189 | 4.560552395   | 4.445125647  | 2.192282579   |
| H190 | 6.002286122   | 2.571170638  | 2.917491256   |
| H191 | 4.273250520   | 2.770983068  | 6.868741770   |
| H192 | -3.202981735  | -0.907441198 | 6.324510441   |
| H193 | -3.270450494  | -3.825406284 | 7.668975162   |
| H194 | -3.193983226  | -2.814018406 | 9.126915307   |
| H195 | -4.942118503  | -2.366984243 | 6.767174906   |
| H196 | -6.932721112  | -0.165465155 | 8.804237035   |
| H197 | 2.802288796   | 4.624081345  | 6.127875859   |
| H198 | -0.231741310  | -0.813433139 | 6.309149271   |
| H199 | -4.581212409  | 3.846242818  | 9.999727296   |
| H200 | -4.898445033  | 2.091008940  | 10.033406892  |
| H201 | -2.203638784  | 1.934511801  | 10.439943134  |
| H202 | 8.557751106   | -6.127601917 | 8.934133716   |
| H203 | -1.047892955  | -6.566001732 | -2.696448531  |
| H204 | -0.318998594  | -8.211845928 | 3.065150938   |
| H205 | -0.518180988  | -8.182748318 | -6.882931085  |
| H206 | 1.120926791   | -7.540990480 | -7.163684542  |
| H207 | -1.430122433  | -5.979799527 | -6.468563519  |
| H208 | -0.073699628  | -1.444866902 | -10.121685611 |
| H209 | -0.904386989  | -6.574819621 | -8.892117604  |
| H210 | -2.746248544  | -2.443532567 | -2.711540315  |
| H211 | -3.861062428  | -4.640122585 | -0.883598770  |
| H212 | 0.117192308   | -3.177943080 | -8.187410359  |

|      |              |              |              |
|------|--------------|--------------|--------------|
| H213 | -2.464312679 | -2.434930576 | -9.430406246 |
| H214 | 1.451865209  | -4.835296264 | -8.524697743 |
| H215 | -0.986064014 | -5.763661363 | -1.130445970 |
| H216 | 0.162329884  | -5.225443570 | -6.365474510 |
| H217 | 1.414807302  | -6.408190205 | -9.004306323 |
| H218 | -6.010161379 | -3.684182135 | -3.728247686 |
| H219 | -3.238981078 | -2.021896877 | -1.090890961 |
| H220 | 2.359809847  | -7.087101002 | -5.499279166 |
| H221 | -2.232866117 | -4.018124673 | -0.593981824 |
| H222 | -4.050361825 | 3.681938521  | 1.148173856  |
| H223 | -3.237123870 | 1.234466780  | 0.470815375  |
| H224 | -8.596200247 | 2.084720022  | 0.929447350  |
| H225 | -7.062476582 | 0.672985675  | -1.211638935 |
| H226 | -6.500840018 | 4.885085184  | -1.062963470 |
| H227 | -7.965334247 | 9.947156958  | -0.981778275 |
| H228 | -7.490495757 | 6.838564591  | 1.259676535  |
| H229 | -8.602480720 | 6.481639983  | -1.251115220 |
| H230 | -5.743376587 | 7.635416542  | -1.150867607 |
| H231 | -9.069512339 | 9.807033117  | -5.068661496 |
| H232 | -2.745223041 | 4.670767957  | -0.683612618 |
| H233 | -4.016730041 | 4.331922815  | -1.862332666 |
| H234 | -8.727999720 | 11.287860184 | -3.015606397 |
| H235 | -7.437710068 | 6.238650595  | -2.550888881 |
| H236 | -5.474742949 | 2.284224546  | -0.798161088 |
| H237 | -7.423328045 | 0.791719772  | 1.208752207  |
| H238 | -9.194835337 | 2.051207273  | -3.603746754 |
| H239 | -1.282555217 | 0.560592477  | -3.184286729 |
| H240 | -9.706098373 | 0.429780986  | -3.102703196 |
| H241 | 9.043466872  | 3.136680739  | 5.489906789  |
| H242 | 7.715265620  | 3.311250900  | 4.550729443  |
| H243 | 2.794220880  | 5.448234971  | -2.089574074 |
| H244 | -0.005670003 | 5.855197133  | -1.366008198 |
| H245 | 2.787245071  | 8.033997390  | -1.449078553 |
| H246 | -2.184901377 | 2.990831252  | -3.226090636 |
| H247 | -3.317884993 | 3.545258440  | -5.201974615 |
| H248 | -3.138671455 | 5.006458672  | -4.628580547 |
| H249 | -3.634317071 | 0.646526516  | -5.448116394 |
| H250 | -5.258897450 | 0.538068866  | -6.191605684 |
| H251 | 2.052725537  | 11.274392028 | -4.985355362 |
| H252 | 0.818414860  | 12.482188659 | -5.442346168 |
| H253 | 1.524288405  | 9.009036179  | -5.238486668 |
| H254 | -0.119553904 | 8.474298857  | -5.511521396 |
| H255 | 0.150107577  | 7.241068781  | -8.752855792 |
| H256 | 0.129869077  | 2.996548211  | -7.193215036 |
| H257 | -5.488762526 | 8.598805475  | -4.882322312 |
| H258 | -2.025617081 | 8.951379299  | -1.327338573 |
| H259 | -2.136387737 | 6.754620743  | -6.118921277 |
| H260 | 2.977934618  | 3.767204091  | -4.170932086 |
| H261 | 4.335469820  | 5.774011850  | -3.832884359 |
| H262 | 0.502276297  | 3.558081247  | -4.594213011 |
| H263 | -7.469971678 | -0.360108274 | -3.368250981 |
| H264 | 6.053914217  | 8.120334282  | -5.238085078 |
| H265 | -5.024045800 | -1.381361053 | -4.418832871 |
| H266 | 3.236251100  | 4.224330472  | -5.857795728 |
| H267 | -2.016603627 | 7.016991904  | -2.860729080 |
| H268 | -5.422108838 | 2.829603698  | -5.286310986 |
| H269 | 5.328582822  | 9.076061477  | -3.928240515 |
| H270 | 0.740249248  | 5.619268677  | -8.784712035 |
| H271 | -1.813032273 | 7.638559525  | -7.564369342 |
| H272 | -4.380002190 | -4.042298314 | -3.773977758 |
| H273 | -5.521213758 | -3.041570706 | -1.567126571 |

|      |              |               |              |
|------|--------------|---------------|--------------|
| H274 | -5.427956107 | 10.601721762  | -3.421073605 |
| H275 | -4.642013400 | 1.293830379   | -3.280345541 |
| H276 | 1.954866687  | 6.336160228   | -5.523140875 |
| H277 | 1.346484269  | 4.250523400   | -7.442814630 |
| H278 | 1.551242797  | 2.465753370   | -5.478450552 |
| H279 | -1.237913723 | 4.668450731   | -5.921889786 |
| H280 | 1.519212140  | 9.806272959   | 0.450253609  |
| H281 | 1.056805577  | 9.877557325   | -2.841616446 |
| H282 | 1.529155295  | 12.755513196  | -3.110289387 |
| H283 | 3.165780824  | 9.902542280   | -0.212879086 |
| H284 | -1.139439284 | 10.991951535  | -2.003871464 |
| H285 | 6.622619515  | -5.425073468  | -6.456322641 |
| H286 | 6.213710844  | -6.616669529  | -5.209255603 |
| H287 | 8.137866942  | -6.497826571  | -0.773183877 |
| H288 | 7.123309931  | -7.772840748  | -7.078791968 |
| H289 | 5.512067673  | -8.064870845  | -7.133537030 |
| H290 | 6.263854374  | 4.437115588   | -0.053373771 |
| H291 | 6.400758027  | 7.476295421   | 0.484949036  |
| H292 | 6.821092584  | 6.559382591   | -3.685282205 |
| H293 | 4.852704189  | 5.542373381   | -0.043284778 |
| H294 | 7.829266066  | 7.641472890   | -0.293234433 |
| H295 | 6.943879290  | 1.231383846   | -5.260366271 |
| H296 | 7.402288657  | 5.823242032   | -1.722794386 |
| H297 | 2.807347849  | -5.258690339  | 7.757792126  |
| H298 | 4.980613711  | -7.036204366  | 6.522691834  |
| H299 | 5.467684905  | -0.575169458  | -5.658951958 |
| H300 | 3.683993553  | 0.735412177   | 3.978455324  |
| H301 | 3.045263002  | -0.816300118  | -8.206459383 |
| H302 | -0.203525056 | -3.309511108  | -3.628613419 |
| H303 | 2.416807926  | 0.109440575   | -6.843773749 |
| H304 | 2.393348221  | -3.041269876  | 6.290157528  |
| H305 | 3.797209544  | -1.696157725  | -5.427808026 |
| H306 | 2.520998000  | -4.045007524  | 4.844645725  |
| H307 | 2.769046928  | -6.052425571  | 6.166397445  |
| H308 | 4.858561361  | -4.697783019  | 5.522721909  |
| H309 | 4.665606515  | -3.779760621  | 7.027991578  |
| H310 | -3.174560995 | -2.325234898  | -7.201535231 |
| H311 | 3.045734945  | -7.630656049  | 8.735552477  |
| H312 | 2.135770158  | -10.365869909 | 7.677313944  |
| H313 | 1.194724751  | -1.283049594  | -3.371178635 |
| H314 | 2.895285062  | -9.563270137  | 10.378236191 |
| H315 | 1.415090833  | -9.905788270  | 9.766920746  |
| H316 | 4.286996549  | -2.647989379  | 4.008452327  |
| H317 | 0.898201313  | 0.631144262   | -4.900844703 |
| H318 | -1.887761781 | -3.445030178  | -5.468770742 |
| H319 | 6.367150865  | -10.199381214 | 3.508621554  |
| H320 | 6.492917355  | -8.824864969  | 0.353147188  |
| H321 | 5.180641268  | -8.121782360  | 3.996462445  |
| H322 | 5.851967769  | -11.138065089 | 2.397676656  |
| H323 | 7.661448546  | -0.278762139  | -7.778191659 |
| H324 | 5.615614211  | -5.195941052  | 2.863744129  |
| H325 | 1.213881651  | -6.754003207  | 3.442324103  |
| H326 | 5.048058613  | -4.027062769  | -5.535017863 |
| H327 | 1.928646111  | -8.968977216  | 2.403417821  |
| H328 | 4.207643083  | -8.618953971  | -3.941279948 |
| H329 | 3.077897406  | -6.619642777  | -2.853249832 |
| H330 | 3.540857116  | -10.932702723 | 8.585989514  |
| H331 | 4.287522686  | -0.622814422  | 3.070393414  |
| H332 | 7.090864423  | -5.745416405  | 4.679502816  |
| H333 | 6.527484510  | -3.940100317  | 2.903894267  |
| H334 | 6.911600953  | -6.126504468  | 7.031810543  |

|       |              |               |              |
|-------|--------------|---------------|--------------|
| H335  | 2.706067817  | -1.068103831  | 6.818851606  |
| H336  | 2.153915253  | -12.253981804 | 0.368265316  |
| H337  | 3.251251312  | -8.955623740  | -0.358354445 |
| H338  | 4.193566478  | -8.929551971  | 1.146487514  |
| H339  | 1.140398136  | -8.730069792  | 0.819813485  |
| H340  | 2.810565384  | -3.696090092  | -4.701815295 |
| H341  | -0.777807259 | 0.513675865   | -6.773544586 |
| H342  | -2.833895396 | -0.647289444  | -7.687854502 |
| H343  | 1.253068129  | -5.303621859  | 2.384831470  |
| H344  | 6.953566604  | -7.259286754  | 5.008308899  |
| H345  | 5.468542654  | -8.948784898  | 5.280344132  |
| H346  | 2.410201927  | 0.388552007   | 5.944874462  |
| H347  | 6.241846441  | -9.422083397  | -2.600230253 |
| H348  | 6.203001082  | -7.118243073  | 0.711867234  |
| H349  | 2.211697455  | -4.801762651  | -5.975286901 |
| H350  | 6.348369760  | 2.037473980   | -6.734247529 |
| H351  | 5.651791737  | 0.795930806   | 6.157845025  |
| H352  | 6.390194516  | 0.754252425   | 4.538469316  |
| H353  | 9.611280112  | -8.172792034  | -1.481384941 |
| H354  | 8.722796144  | -9.381864296  | -0.828384972 |
| H355  | 9.187076617  | -9.251516364  | 3.727870709  |
| H356  | 7.872348873  | -9.027404243  | 1.874307991  |
| H357  | 11.218208457 | -8.818126824  | 1.926309849  |
| H358  | 9.168357333  | -7.475318718  | 3.795584635  |
| H359  | 8.806628740  | 0.140398862   | 5.612899020  |
| H360  | -1.989519908 | 13.805382679  | -0.713789641 |
| H361  | 7.259110836  | -5.429458506  | 9.939411133  |
| H362  | 7.413302214  | -3.400245496  | 8.085576105  |
| H363  | -3.275929651 | 12.523981371  | -3.147936930 |
| H364  | -3.161600995 | 10.994328714  | -0.477078963 |
| H365  | -4.630339457 | 11.606392431  | -1.261236139 |
| H366  | -4.506063515 | 6.609892681   | -5.381974558 |
| H367  | 1.936600044  | -1.052011415  | 0.111607594  |
| Mo368 | 3.806591053  | -4.940631531  | -0.077644078 |
| N369  | -7.153860094 | -6.593977175  | -0.872640979 |
| N370  | -9.320190215 | -3.592189063  | -0.348655868 |
| N371  | -9.978861456 | -3.162221962  | 2.372592405  |
| N372  | -7.788712733 | -4.269240838  | 3.729937443  |
| N373  | -5.650297646 | -2.573239094  | 2.826756486  |
| N374  | -6.532621479 | -0.106328995  | 3.942967617  |
| N375  | -6.832061758 | -0.666443794  | 6.774245954  |
| N376  | -4.558694412 | -2.170560288  | 7.697360936  |
| N377  | -2.241772166 | -1.094030946  | 6.602317840  |
| N378  | -2.243243571 | 1.836934008   | 6.067562147  |
| N379  | -3.720925267 | 2.679221723   | 8.431892875  |
| N380  | 2.298508499  | -9.438767631  | 9.557744399  |
| N381  | 3.681333095  | -7.786743445  | 7.945878433  |
| N382  | 3.758557192  | -2.364408486  | 4.838843383  |
| N383  | 2.696367867  | -0.585532891  | 5.926863292  |
| N384  | 3.676375156  | -0.273115385  | 3.840373155  |
| N385  | 6.657492207  | -5.925785743  | 8.024225800  |
| N386  | -5.073190171 | -3.279570186  | -3.667182068 |
| N387  | -1.455590939 | -5.912046749  | -2.024366377 |
| N388  | -5.227183840 | -0.650746889  | -3.718114705 |
| N389  | -7.665394596 | 0.630232756   | -3.494211583 |
| N390  | -7.787178112 | 1.279128122   | -0.802846271 |
| N391  | -5.630907101 | 2.980528452   | -0.069678299 |
| N392  | -2.278924934 | 2.333082029   | -2.440508161 |
| N393  | -2.193813366 | 0.454883928   | -1.241398224 |
| N394  | -6.090332881 | 5.647726149   | -0.529232256 |
| N395  | -8.468476116 | 8.194503743   | -3.769338398 |

|      |              |              |              |
|------|--------------|--------------|--------------|
| N396 | -8.584940179 | 10.281039295 | -3.024643457 |
| N397 | 8.300510428  | 2.614284230  | 5.019944881  |
| N398 | 7.147253077  | 6.946422298  | 0.023584269  |
| N399 | 6.121799896  | 7.222075869  | -3.361370986 |
| N400 | 3.696627663  | 6.336786885  | -4.415859185 |
| N401 | -0.475339158 | 4.896423212  | -6.595533403 |
| N402 | 0.259724960  | 6.352521832  | -8.275149776 |
| N403 | -1.479749874 | 6.972570283  | -6.872449709 |
| N404 | 1.880141491  | 5.912243566  | -2.243642237 |
| N405 | 1.928473805  | 8.485614221  | -1.119270302 |
| N406 | 1.101878590  | 10.830534325 | -2.477757355 |
| N407 | 0.523282084  | 9.234440670  | -5.291608251 |
| N408 | -1.436366207 | 11.900139193 | -2.351479995 |
| N409 | 6.217956098  | -7.333482313 | -7.259572555 |
| N410 | 4.278198556  | -4.607164764 | -5.888896231 |
| N411 | 3.350752855  | -1.717281353 | -6.364752934 |
| N412 | 5.520252193  | 0.159494359  | -6.376534378 |
| N413 | 0.889851050  | -5.531351474 | -9.030794308 |
| N414 | -0.839434476 | -3.297786468 | -8.537035185 |
| N415 | 8.650505614  | -8.460984221 | -1.273837639 |
| N416 | 4.624759363  | -6.801267770 | -1.364477854 |
| N417 | 4.541681803  | -8.178073383 | -3.088545546 |
| N418 | 8.647776884  | -8.367784683 | 1.931818079  |
| N419 | 0.400143479  | 1.747670401  | -0.124874837 |
| N420 | 1.282669850  | 1.098295308  | -0.391192615 |
| O421 | -7.360426950 | -4.169443842 | 0.656147543  |
| O422 | -8.789366493 | -1.219571290 | 2.3141113786 |
| O423 | -8.323983136 | -3.008376726 | 5.561922066  |
| O424 | -4.725141891 | -2.919887755 | 4.876892673  |
| O425 | -4.344978779 | 0.502853705  | 4.080455629  |
| O426 | -6.096476125 | 1.472488843  | 7.095889635  |
| O427 | -4.969877261 | -1.375023652 | 9.811794410  |
| O428 | -0.911731660 | -2.501656441 | 7.842488643  |
| O429 | -0.140987763 | 1.568947034  | 6.924211849  |
| O430 | -2.004863984 | 4.136098270  | 8.705709124  |
| O431 | -2.967982580 | 3.133675026  | 11.904869331 |
| O432 | 4.561605440  | -9.523877134 | 6.694382020  |
| O433 | 4.992289658  | -5.893479466 | 9.609580789  |
| O434 | 9.257900409  | -3.616587037 | 8.928068844  |
| O435 | -5.527584104 | -0.456062114 | -1.447744498 |
| O436 | -2.968368712 | -5.206563501 | -3.568045729 |
| O437 | -6.772900562 | 2.639666467  | -4.123370119 |
| O438 | -4.594835711 | 2.452701855  | -5.687536988 |
| O439 | -9.827878213 | 2.303167959  | -1.089294032 |
| O440 | -6.605150266 | 3.349590778  | 1.962292108  |
| O441 | -4.524520327 | 6.212131398  | 1.033240872  |
| O442 | -6.944285544 | 8.770958062  | 0.887786084  |
| O443 | 8.295235291  | 0.223091702  | 7.588423243  |
| O444 | 2.814829865  | 5.686863275  | 3.645059954  |
| O445 | 4.888892342  | 7.963746705  | -1.592708552 |
| O446 | 3.306090806  | 8.395418066  | -5.364499702 |
| O447 | 0.222068152  | 6.389896367  | -3.748066777 |
| O448 | -0.092649726 | 8.086736295  | -0.115925497 |
| O449 | 2.579765306  | 6.050627866  | 0.749156729  |
| O450 | 1.931275089  | 12.147899748 | -0.800996153 |
| O451 | -0.853816777 | 13.699316255 | -3.625595557 |
| O452 | -1.153912621 | 10.762322608 | -5.551912253 |
| O453 | -3.848110524 | 14.352694659 | -1.358367744 |
| O454 | -3.709399011 | 6.595321114  | -4.817095993 |
| O455 | 3.626575847  | -6.721657263 | -6.511645575 |
| O456 | 2.060664462  | -2.997444948 | -7.762062433 |

|  |                       |              |               |              |
|--|-----------------------|--------------|---------------|--------------|
|  | O457                  | 4.465191579  | 1.358000245   | -8.011720003 |
|  | O458                  | 8.959483758  | 1.098538419   | -7.014787251 |
|  | O459                  | -2.546327964 | -4.737578777  | -9.007864658 |
|  | O460                  | -0.360857363 | -7.847120269  | -4.271434415 |
|  | O461                  | 1.762416410  | -7.333210096  | -4.725712464 |
|  | O462                  | -1.155729683 | 0.141055107   | -9.442944730 |
|  | O463                  | 9.813245453  | -6.612442138  | 1.105089372  |
|  | O464                  | 11.744740707 | -7.947716311  | 3.694424774  |
|  | O465                  | -0.861637025 | -6.047352714  | 1.024623422  |
|  | O466                  | -0.894179357 | -7.800004115  | 2.392730599  |
|  | O467                  | 4.090651123  | -11.453588531 | 1.270650606  |
|  | O468                  | 2.077180936  | -11.281274761 | 0.265309482  |
|  | O469                  | 4.485633885  | -6.080084961  | 1.754925387  |
|  | O470                  | 3.739098174  | -7.372877680  | 3.444893735  |
|  | O471                  | 2.325250299  | -6.387484401  | 0.298030578  |
|  | O472                  | 7.404994308  | -6.431330867  | 5.322693701  |
|  | O473                  | 6.190691949  | -4.661434599  | 3.470307199  |
|  | O474                  | -2.644760192 | 4.190836794   | -4.860680006 |
|  | O475                  | 6.639929870  | -10.975554326 | 2.956397011  |
|  | O476                  | 5.912274811  | -8.631659691  | 4.451060580  |
|  | S477                  | 4.877709403  | 4.183567225   | -2.053980460 |
|  | S478                  | 3.142246444  | 0.978801351   | -2.794360446 |
|  | S479                  | 2.640827882  | -4.130782502  | -1.952167297 |
|  | S480                  | 3.965164804  | 1.545570971   | 0.686560727  |
|  | S481                  | 0.352859064  | -2.408529780  | -0.661033735 |
|  | S482                  | 5.404071141  | -2.197063733  | -3.818266615 |
|  | S483                  | 3.031385888  | -3.352131742  | 1.569706840  |
|  | S484                  | 6.582676624  | 0.679238295   | -1.529053102 |
|  | S485                  | 6.011687502  | -4.108359124  | -0.504338027 |
|  | S486                  | 6.101033284  | -1.218255589  | 1.884553125  |
|  | <b>12</b>             |              |               |              |
|  | Fe( 139)              | 0.556        | -2.402        |              |
|  | Fe( 140)              | 0.280        | -0.423        |              |
|  | Fe( 141)              | 0.552        | -2.625        |              |
|  | Fe( 142)              | 0.549        | 2.441         |              |
|  | Fe( 143)              | 0.590        | 3.103         |              |
|  | Fe( 144)              | 0.506        | 2.240         |              |
|  | <b>S=1</b>            |              |               |              |
|  | bm2cnx2b262hx35.car_2 |              |               |              |
|  | C1                    | -7.791051514 | -5.134675787  | 1.168980207  |
|  | C2                    | -7.856804699 | -6.520676800  | 0.514222627  |
|  | C3                    | -8.984036306 | -3.034373358  | 1.609806480  |
|  | C4                    | -8.761072045 | -2.898172075  | 3.115025593  |
|  | C5                    | -9.012732291 | -3.895439353  | 5.331588750  |
|  | C6                    | -7.539006778 | -3.997649117  | 5.741423153  |
|  | C7                    | -5.316580106 | -4.850089649  | 5.152354430  |
|  | C8                    | -4.565270377 | -3.560691986  | 4.808522775  |
|  | C9                    | -4.319363408 | -1.664365721  | 3.296602411  |
|  | C10                   | -4.608108772 | -0.538532653  | 4.301161718  |
|  | C11                   | -6.202512375 | 0.526335332   | 5.793030913  |
|  | C12                   | -5.603587143 | 0.307732520   | 7.188609953  |
|  | C13                   | -5.334000751 | -1.237381053  | 9.069020489  |
|  | C14                   | -3.866286606 | -1.592225197  | 9.335005682  |
|  | C15                   | -1.850596170 | -2.726688089  | 8.493163987  |
|  | C16                   | -0.747724931 | -1.971018095  | 7.747334244  |
|  | C17                   | -0.272949437 | -0.222177143  | 6.050383953  |
|  | C18                   | -0.315965870 | 1.266717162   | 6.438729309  |
|  | C19                   | -0.526140734 | -0.484692643  | 4.540155671  |
|  | C20                   | 0.306114918  | 0.441291010   | 3.647244587  |
|  | C21                   | -0.259433283 | -1.955822283  | 4.200364823  |
|  | C22                   | -1.663945065 | 3.317397372   | 6.650182796  |
|  | C23                   | -1.795450297 | 3.503557450   | 8.175410970  |
|  | C24                   | -2.826642856 | 3.972147251   | 5.866797035  |
|  | C25                   | -3.066503504 | 5.412007665   | 6.336207856  |
|  | C26                   | -2.547809124 | 3.941366116   | 4.358133716  |
|  | C27                   | -2.925645257 | 2.913893232   | 10.240370818 |
|  | C28                   | -1.640885024 | 2.803950305   | 11.037012662 |
|  | C29                   | 4.979481920  | -9.412385697  | 8.172999232  |



|     |               |              |              |
|-----|---------------|--------------|--------------|
| C30 | 5.656359673   | -8.409521135 | 7.238119389  |
| C31 | 5.984918921   | -5.957491963 | 6.877659488  |
| C32 | 7.048833254   | -5.308769065 | 7.784409685  |
| C33 | 4.856958256   | -4.966572530 | 6.538064590  |
| C34 | 5.341502055   | -3.737616496 | 5.765939241  |
| C35 | 4.166839530   | -2.947119123 | 5.193767567  |
| C36 | 4.121538318   | -0.573929302 | 4.399840428  |
| C37 | 9.323193507   | -4.411829351 | 7.902698713  |
| C38 | 9.615156340   | -2.974193270 | 7.531740981  |
| C39 | -4.911319549  | -3.063456175 | -1.537839798 |
| C40 | -5.337301839  | -1.591983243 | -1.675436761 |
| C41 | -3.393403829  | -3.087531986 | -1.248382833 |
| C42 | -2.815891370  | -4.434896763 | -0.769113961 |
| C43 | -2.338541038  | -5.371404773 | -1.876223739 |
| C44 | -5.859083058  | 0.164539852  | -3.307828831 |
| C45 | -7.256028546  | 0.692994886  | -2.953418127 |
| C46 | -5.533420745  | 0.446913340  | -4.787585743 |
| C47 | -9.326722081  | 0.276167046  | -1.712008168 |
| C48 | -9.108262089  | 0.815017023  | -0.289220483 |
| C49 | -7.570576342  | 0.986911708  | 1.625567775  |
| C50 | -6.525093934  | 2.098545728  | 1.728787682  |
| C51 | -4.777999961  | 3.445328797  | 0.663893588  |
| C52 | -5.418805513  | 4.844267469  | 0.848658266  |
| C53 | -3.972405133  | 3.548320488  | -0.641181653 |
| C54 | -3.088419472  | 2.405263687  | -1.032211538 |
| C55 | -2.417597220  | 1.420425174  | -0.346669601 |
| C56 | -1.853070741  | 1.243952930  | -2.485868418 |
| C57 | -7.226593592  | 6.319139830  | 0.026775609  |
| C58 | -7.537773449  | 6.915715819  | 1.397395995  |
| C59 | -8.521205998  | 6.111460432  | -0.794779327 |
| C60 | -9.089475542  | 7.327906694  | -1.465882788 |
| C61 | -9.236408883  | 8.625025913  | -1.012892468 |
| C62 | -10.029184884 | 8.431981881  | -3.073583534 |
| C63 | 8.039619111   | 2.804843087  | 4.824459046  |
| C64 | 8.951055192   | 1.653006020  | 5.205869271  |
| C65 | 6.683159223   | 2.169858713  | 4.416409058  |
| C66 | 5.633095751   | 3.194265212  | 4.056480675  |
| C67 | 4.784256899   | 3.742650446  | 5.035333811  |
| C68 | 5.479125371   | 3.635802404  | 2.728770891  |
| C69 | 3.817049981   | 4.699707721  | 4.707768289  |
| C70 | 4.526654220   | 4.597508468  | 2.388161445  |
| C71 | 3.695020510   | 5.127924058  | 3.379756703  |
| C72 | 5.731648445   | 6.730147811  | -2.272100657 |
| C73 | 4.746576606   | 7.591533689  | -3.071579741 |
| C74 | 4.995812638   | 5.560874735  | -1.599679564 |
| C75 | 4.022434901   | 8.322092638  | -5.304105702 |
| C76 | 2.624528670   | 7.730603423  | -5.497082725 |
| C77 | 1.153956713   | 5.774904198  | -5.137645406 |
| C78 | 0.330262036   | 5.978247424  | -3.846331632 |
| C79 | 1.387044081   | 4.292725558  | -5.483901740 |
| C80 | 0.152230242   | 3.397607389  | -5.633945327 |
| C81 | -0.746639963  | 3.640864182  | -6.858966430 |
| C82 | -2.165187167  | 5.657171196  | -7.269495379 |
| C83 | 0.290059676   | 6.189372017  | -1.420094286 |
| C84 | 0.079859382   | 7.679605115  | -1.084018424 |
| C85 | 0.965258532   | 5.516326651  | -0.215763974 |
| C86 | 1.115935992   | 9.895865958  | -1.051528587 |
| C87 | 0.493111507   | 11.064745367 | -1.810619016 |
| C88 | -0.754760141  | 11.833182626 | -3.786453450 |
| C89 | -2.149984751  | 12.353958642 | -3.376142291 |
| C90 | -0.740103961  | 11.419245799 | -5.273243534 |

|       |              |               |              |
|-------|--------------|---------------|--------------|
| C91   | -1.661436775 | 10.236203956  | -5.547052112 |
| C92   | -4.187344108 | 11.922164346  | -2.080005269 |
| C93   | -4.271744014 | 13.234361267  | -1.309184488 |
| C94   | -4.784299416 | 10.771847059  | -1.224853449 |
| C95   | -4.864576949 | 9.473883246   | -1.993759701 |
| C96   | -5.961772109 | 9.205733071   | -2.826621331 |
| C97   | -3.821960476 | 8.532890768   | -1.944958342 |
| C98   | -6.009564232 | 8.050530061   | -3.609375246 |
| C99   | -3.839429598 | 7.383796486   | -2.740226112 |
| C100  | -4.936321180 | 7.159855902   | -3.570415853 |
| C101  | 5.592327161  | -5.980020063  | -6.890029768 |
| C102  | 4.117671871  | -5.707309260  | -6.647310722 |
| C103  | 2.457743076  | -3.975897626  | -6.002796676 |
| C104  | 1.994560988  | -2.878651477  | -6.968853025 |
| C105  | 2.238358588  | -0.524449414  | -7.590326947 |
| C106  | 3.337149208  | 0.511109594   | -7.806229748 |
| C107  | 5.546473532  | 1.382227878   | -7.208359563 |
| C108  | 6.653771259  | 1.003734659   | -8.171551451 |
| C109  | -1.075297179 | -6.072557023  | -8.073337944 |
| C110  | -2.160178611 | -5.005065444  | -8.252294916 |
| C111  | -0.818114437 | -6.290304018  | -6.564597133 |
| C112  | -0.053726683 | -7.601662460  | -6.306992782 |
| C113  | 0.436718804  | -7.656681248  | -4.877551240 |
| C114  | -2.713934259 | -2.622587939  | -8.278394327 |
| C115  | -2.190093146 | -1.515868469  | -9.172150311 |
| C116  | -3.269773514 | -2.147117226  | -6.914066480 |
| C117  | -2.174108673 | -1.862312629  | -5.922309244 |
| C118  | -1.485571625 | -0.636738526  | -5.936411923 |
| C119  | -1.747859390 | -2.863445728  | -5.032531313 |
| C120  | -0.373565032 | -0.443251603  | -5.110129526 |
| C121  | -0.637090119 | -2.665872671  | -4.205159079 |
| C122  | 0.065176373  | -1.458934039  | -4.255586274 |
| C123  | 8.605289200  | -6.792167766  | -1.243558301 |
| C124  | 9.588796455  | -6.590643112  | -0.078383441 |
| C125  | 7.200806353  | -7.190613350  | -0.763132965 |
| C126  | 6.135958591  | -7.231140991  | -1.817233042 |
| C127  | 6.029440007  | -8.130939419  | -2.857827380 |
| C128  | 4.232102093  | -6.838318262  | -2.815893099 |
| C129  | 10.518779135 | -7.351743699  | 2.035631834  |
| C130  | 11.950150968 | -7.236114620  | 1.560011497  |
| C131  | 0.618650245  | -6.582895814  | 2.051585144  |
| C132  | 2.029491825  | -6.202903200  | 2.411254659  |
| C133  | 3.101587511  | -6.743118138  | 1.384288235  |
| C134  | 3.013259608  | -8.295708730  | 1.309996678  |
| C135  | 4.164799757  | -8.918727906  | 0.504475837  |
| C136  | 4.266479033  | -10.413739368 | 0.628247316  |
| C137  | 4.494794653  | -6.397229153  | 1.986376113  |
| C138  | 4.038507826  | -1.122970425  | -1.336083942 |
| Fe139 | 4.546336578  | -2.686374138  | -2.418722061 |
| Fe140 | 2.305854314  | 0.073643203   | -1.000697047 |
| Fe141 | 5.090056969  | 0.402401515   | -0.597765930 |
| Fe142 | 4.110454562  | -0.167010547  | -2.977738716 |
| Fe143 | 3.915008565  | 2.332879927   | -1.960578050 |
| Fe144 | 5.137144983  | -2.106649098  | 0.037806686  |
| Fe145 | 2.706420031  | -2.315058574  | -0.572805471 |
| H146  | -6.084010890 | -7.222071434  | 1.238291368  |
| H147  | -5.991740734 | -6.695969447  | -0.303851757 |
| H148  | -9.719024265 | -4.744455150  | 0.556407730  |
| H149  | -8.356321150 | -6.430202065  | -0.463693410 |
| H150  | -8.526716837 | -7.137575579  | 1.138704905  |
| H151  | -8.215213924 | -2.415071960  | 1.126473453  |

|      |              |              |              |
|------|--------------|--------------|--------------|
| H152 | -9.685380803 | -4.699687950 | 3.451695111  |
| H153 | -9.968212549 | -2.610615899 | 1.367741539  |
| H154 | -9.562366114 | -4.738780693 | 5.769577183  |
| H155 | -7.128178752 | -5.088944299 | 4.051478271  |
| H156 | -9.400345194 | -2.965804173 | 5.769161502  |
| H157 | -3.227290424 | -1.758196657 | 3.232273565  |
| H158 | -5.608645694 | -3.369047007 | 3.029948071  |
| H159 | -4.930682648 | -5.677411716 | 4.541059255  |
| H160 | -5.848166130 | 1.501158479  | 5.436937696  |
| H161 | -6.573781638 | -1.159466276 | 4.505043365  |
| H162 | -5.109313880 | -5.070762785 | 6.206209850  |
| H163 | -4.699366325 | -1.374353770 | 2.306490666  |
| H164 | -6.188708662 | -1.678693524 | 7.163951758  |
| H165 | -7.296992553 | 0.565537153  | 5.880903060  |
| H166 | -0.875695043 | -2.633078642 | 4.809132969  |
| H167 | -0.493100461 | -2.148271248 | 3.142016335  |
| H168 | 0.799925127  | -2.214587572 | 4.357849716  |
| H169 | -1.591400237 | -0.274020647 | 4.353116994  |
| H170 | -5.944869132 | -2.083767494 | 9.416298645  |
| H171 | -2.430514466 | 2.917363555  | 3.976227458  |
| H172 | -3.352970392 | 2.124005093  | 8.303555936  |
| H173 | -3.340840835 | 5.464028469  | 7.399477174  |
| H174 | 0.039330348  | 0.285888271  | 2.591152030  |
| H175 | 1.379209759  | 0.227412566  | 3.736288515  |
| H176 | 7.869790283  | 3.417464857  | 5.731124660  |
| H177 | -3.376112237 | 4.415915845  | 3.811817887  |
| H178 | -3.881551326 | 5.864325822  | 5.752888048  |
| H179 | -1.628175738 | 4.502835451  | 4.125978344  |
| H180 | -2.164408788 | 6.026190838  | 6.187157257  |
| H181 | -3.741837681 | 3.385186609  | 6.067386396  |
| H182 | -0.725945093 | 3.829970487  | 6.390559174  |
| H183 | -2.295429802 | 1.427210159  | 5.840915919  |
| H184 | 0.153475731  | 1.505921198  | 3.879135487  |
| H185 | 1.234515806  | 4.479583136  | -0.487880279 |
| H186 | 0.225122013  | 5.491527487  | 0.599575197  |
| H187 | 2.249439877  | 6.141637265  | 1.136960472  |
| H188 | 2.215677890  | 6.329168633  | 3.753906586  |
| H189 | 4.401737974  | 4.912921204  | 1.351444250  |
| H190 | 6.093531647  | 3.195306747  | 1.940114404  |
| H191 | 4.875784299  | 3.417890532  | 6.075492308  |
| H192 | -2.175669360 | -0.887421956 | 6.780645894  |
| H193 | -1.801664656 | -3.774953177 | 8.163219234  |
| H194 | -1.600185261 | -2.699068968 | 9.562047432  |
| H195 | -3.702938794 | -2.504096184 | 7.474481716  |
| H196 | -5.562330061 | -0.367459290 | 9.698201644  |
| H197 | 3.157329078  | 5.106408735  | 5.478617175  |
| H198 | 0.741780421  | -0.552156798 | 6.309003525  |
| H199 | -3.406524382 | 3.878609753  | 10.469712755 |
| H200 | -3.593280560 | 2.108904610  | 10.585000872 |
| H201 | -0.852493561 | 2.170185496  | 10.568555193 |
| H202 | 10.236751418 | -5.012693095 | 7.781263684  |
| H203 | -0.856615176 | -6.719801147 | -2.316106706 |
| H204 | 0.801647633  | -8.098174132 | 3.232672203  |
| H205 | -0.730863805 | -8.452228776 | -6.471048458 |
| H206 | 0.793059084  | -7.692828290 | -7.003399359 |
| H207 | -1.773354585 | -6.321179888 | -6.017533027 |
| H208 | -1.466236714 | -1.857969160 | -9.949719459 |
| H209 | -1.542607744 | -6.988923054 | -8.464971461 |
| H210 | -2.859711311 | -2.750860701 | -2.151178561 |
| H211 | -3.569831605 | -4.983635874 | -0.177558271 |
| H212 | -0.764411055 | -3.484115549 | -8.021263477 |

|      |               |              |              |
|------|---------------|--------------|--------------|
| H213 | -3.569280869  | -3.037778081 | -8.849560913 |
| H214 | 0.665973280   | -5.033487685 | -8.514400921 |
| H215 | -0.695321649  | -5.944170356 | -0.741849984 |
| H216 | -0.256633648  | -5.427504829 | -6.175388433 |
| H217 | 0.699691051   | -6.623199874 | -8.941458198 |
| H218 | -6.138103231  | -4.314130290 | -2.635110034 |
| H219 | -3.201447299  | -2.341072296 | -0.464338056 |
| H220 | 2.199052501   | -7.060714076 | -5.522695553 |
| H221 | -1.981637809  | -4.237585129 | -0.081290122 |
| H222 | -4.114290881  | 3.295616764  | 1.527547726  |
| H223 | -2.406917084  | 1.163892961  | 0.706937352  |
| H224 | -8.487156927  | 1.376860116  | 2.087478132  |
| H225 | -7.211714344  | -0.034695429 | -0.212849146 |
| H226 | -7.035793338  | 4.197891596  | -0.226954613 |
| H227 | -8.957863217  | 9.112936684  | -0.085090375 |
| H228 | -7.865361610  | 6.164794371  | 2.156631754  |
| H229 | -9.278578094  | 5.623346846  | -0.155686134 |
| H230 | -6.546510876  | 7.005337197  | -0.502747653 |
| H231 | -10.488492937 | 8.722565660  | -4.015305913 |
| H232 | -3.346161667  | 4.451397002  | -0.549882144 |
| H233 | -4.674783961  | 3.743041050  | -1.468081986 |
| H234 | -10.076548714 | 10.297305238 | -2.049657155 |
| H235 | -8.290547466  | 5.396493812  | -1.600780428 |
| H236 | -5.742485337  | 1.696419481  | -0.141216167 |
| H237 | -7.235595983  | 0.140459142  | 2.243992861  |
| H238 | -9.796630047  | 1.080392943  | -2.291232205 |
| H239 | -1.391577412  | 0.884834521  | -3.401169624 |
| H240 | -10.038126090 | -0.558779512 | -1.660206140 |
| H241 | 9.396803661   | 4.123447854  | 4.035877184  |
| H242 | 7.936412745   | 4.171335303  | 3.301690817  |
| H243 | 1.984654688   | 5.599517081  | -2.635429582 |
| H244 | -0.718701628  | 5.764062115  | -1.528428805 |
| H245 | 1.813561969   | 8.177497402  | -2.062883098 |
| H246 | -3.047527277  | 2.867312168  | -3.162617815 |
| H247 | -4.360080410  | 3.038306391  | -4.829736149 |
| H248 | -4.179965723  | 4.528650126  | -4.305810360 |
| H249 | -4.505819219  | 0.122877605  | -5.000826735 |
| H250 | -6.224763726  | -0.115211575 | -5.437083855 |
| H251 | 0.298767956   | 11.202222934 | -5.562049819 |
| H252 | -1.096566288  | 12.275106469 | -5.861414043 |
| H253 | -0.041653290  | 8.887989529  | -5.658249056 |
| H254 | -1.649211604  | 8.198798261  | -5.676359645 |
| H255 | -1.778424995  | 6.842955663  | -8.893139070 |
| H256 | -1.179561567  | 2.686620891  | -7.195898751 |
| H257 | -6.875779882  | 7.850516898  | -4.243950794 |
| H258 | -2.970705600  | 8.682562404  | -1.274523996 |
| H259 | -3.598035035  | 6.296011753  | -5.928698596 |
| H260 | 2.023094895   | 3.840052413  | -4.706602249 |
| H261 | 3.205951077   | 5.978882920  | -4.582079417 |
| H262 | -0.455862160  | 3.415368733  | -4.716369464 |
| H263 | -7.832720494  | -1.145112120 | -2.306407946 |
| H264 | 4.492835257   | 8.403086020  | -6.293937391 |
| H265 | -5.544643264  | -1.997055578 | -3.622675933 |
| H266 | 1.966763726   | 4.265365201  | -6.421313197 |
| H267 | -2.988342859  | 6.699461957  | -2.742636702 |
| H268 | -6.406125970  | 2.173954189  | -4.554495387 |
| H269 | 3.878794159   | 9.339557541  | -4.914456320 |
| H270 | -1.049358234  | 5.277075073  | -8.956786430 |
| H271 | -3.562721535  | 7.137226900  | -7.432303039 |
| H272 | -4.510519374  | -4.505348946 | -2.950193034 |
| H273 | -5.431247445  | -3.435767733 | -0.635384473 |

|      |              |               |              |
|------|--------------|---------------|--------------|
| H274 | -6.797143795 | 9.908564162   | -2.866152718 |
| H275 | -5.181462831 | 0.784554349   | -2.695812707 |
| H276 | 0.566923447  | 6.262263633   | -5.927351663 |
| H277 | -0.142456929 | 4.025355217   | -7.690914488 |
| H278 | 0.540734366  | 2.374138766   | -5.719640298 |
| H279 | -2.484998023 | 4.295080446   | -5.803240150 |
| H280 | 0.669076044  | 9.905327469   | -0.046523127 |
| H281 | -0.235096610 | 9.804748379   | -3.261068237 |
| H282 | -0.085934895 | 12.698489885  | -3.666999868 |
| H283 | 2.185829120  | 10.122437313  | -0.947554919 |
| H284 | -2.375981357 | 10.769072230  | -2.112252979 |
| H285 | 6.090244366  | -5.061284897  | -7.234320782 |
| H286 | 6.020708777  | -6.221213212  | -5.894438363 |
| H287 | 8.545186618  | -5.812970049  | -1.740743484 |
| H288 | 6.725613821  | -7.364330486  | -7.868322076 |
| H289 | 5.178520110  | -7.836579572  | -7.613558684 |
| H290 | 5.745926759  | 4.926711410   | -1.109349357 |
| H291 | 5.714358791  | 8.003813054   | -0.677511509 |
| H292 | 5.616797417  | 6.978307893   | -4.831135928 |
| H293 | 4.300280743  | 5.958529361   | -0.848157780 |
| H294 | 6.987118796  | 8.245919469   | -1.674793758 |
| H295 | 5.977578766  | 1.568388235   | -6.213134926 |
| H296 | 6.494729053  | 6.321780182   | -2.953241240 |
| H297 | 4.353892152  | -4.663280178  | 7.471468935  |
| H298 | 6.446179880  | -6.309048819  | 5.946390265  |
| H299 | 4.615334364  | -0.345201432  | -6.399837497 |
| H300 | 4.102130083  | 1.212100795   | 3.412941504  |
| H301 | 1.939184464  | -0.899980715  | -8.577586710 |
| H302 | -0.310743434 | -3.453309151  | -3.522562869 |
| H303 | 1.369439506  | 0.025776723   | -7.193515687 |
| H304 | 3.516462687  | -2.575863790  | 5.995643515  |
| H305 | 3.101615495  | -1.558605430  | -5.876652265 |
| H306 | 3.545993768  | -3.605397995  | 4.562029738  |
| H307 | 4.120974175  | -5.517209576  | 5.929938421  |
| H308 | 5.983840018  | -4.049065458  | 4.928742764  |
| H309 | 5.943790554  | -3.079609777  | 6.411865533  |
| H310 | -3.931480761 | -2.938203111  | -6.533289826 |
| H311 | 4.918124306  | -6.992777092  | 8.436232844  |
| H312 | 4.134342999  | -9.829413632  | 7.604240430  |
| H313 | 0.943989691  | -1.285305633  | -3.633224997 |
| H314 | 5.191080201  | -8.838362469  | 10.139237232 |
| H315 | 3.676761991  | -9.337804097  | 9.764184356  |
| H316 | 5.071895325  | -2.089010245  | 3.483381034  |
| H317 | 0.177977828  | 0.499415298   | -5.116115537 |
| H318 | -2.287843758 | -3.811917242  | -4.986587857 |
| H319 | 7.718554481  | -9.477668252  | 2.854533648  |
| H320 | 7.256298971  | -8.193256751  | -0.301895339 |
| H321 | 6.423932722  | -7.488089087  | 3.453078863  |
| H322 | 7.151211332  | -10.515614968 | 1.860922623  |
| H323 | 6.417692044  | 0.155269683   | -8.859823845 |
| H324 | 6.421950421  | -4.585050746  | 2.190517557  |
| H325 | 2.290524573  | -6.552254455  | 3.420768001  |
| H326 | 4.553837848  | -3.765005170  | -6.158356386 |
| H327 | 3.039277083  | -8.695169215  | 2.335587235  |
| H328 | 4.428127424  | -8.373470302  | -4.258915771 |
| H329 | 3.258203195  | -6.447807458  | -3.080648245 |
| H330 | 5.696072048  | -10.237851720 | 8.321431400  |
| H331 | 4.718360467  | -0.115280819  | 2.470997753  |
| H332 | 8.167796058  | -4.932454828  | 3.799010939  |
| H333 | 7.262531976  | -3.284221482  | 2.072489466  |
| H334 | 8.344693476  | -5.204283510  | 6.155417322  |

|       |              |               |              |
|-------|--------------|---------------|--------------|
| H335  | 3.719816947  | -0.533339312  | 6.414089728  |
| H336  | 3.281069074  | -12.013157266 | 0.400226074  |
| H337  | 4.032640973  | -8.663839455  | -0.557601376 |
| H338  | 5.130718158  | -8.515365556  | 0.827848288  |
| H339  | 2.053460103  | -8.582819535  | 0.855906228  |
| H340  | 2.445764501  | -3.616835862  | -4.962084521 |
| H341  | -1.811883032 | 0.153391124   | -6.617048865 |
| H342  | -3.883568393 | -1.254737301  | -7.108873187 |
| H343  | 2.098922057  | -5.107748541  | 2.380649903  |
| H344  | 8.231179090  | -6.435685391  | 4.186027668  |
| H345  | 6.958437931  | -8.235988856  | 4.705781077  |
| H346  | 3.168141957  | 0.841616238   | 5.546188557  |
| H347  | 6.696361167  | -8.917314730  | -3.191011733 |
| H348  | 6.881299795  | -6.498164551  | 0.024966497  |
| H349  | 1.775367097  | -4.822005260  | -6.107885415 |
| H350  | 5.104021469  | 2.326608122   | -7.566433618 |
| H351  | 6.337410760  | 1.559922814   | 5.265296939  |
| H352  | 6.857130530  | 1.494289677   | 3.563502218  |
| H353  | 10.031372062 | -7.406214244  | -2.584075983 |
| H354  | 9.346693178  | -8.642915558  | -1.760002049 |
| H355  | 10.450558024 | -8.254416686  | 2.662841722  |
| H356  | 8.901459515  | -8.260594197  | 0.983896507  |
| H357  | 12.154144236 | -7.708373839  | 0.569138105  |
| H358  | 10.265954019 | -6.486186514  | 2.669346501  |
| H359  | 9.464889381  | 1.171710914   | 4.337903082  |
| H360  | -3.314760673 | 13.582694211  | -0.854873463 |
| H361  | 9.048475628  | -4.417768977  | 8.972359873  |
| H362  | 8.740234731  | -2.389137582  | 7.158619690  |
| H363  | -4.797619397 | 12.040914138  | -2.990667062 |
| H364  | -4.176700990 | 10.644363503  | -0.315217401 |
| H365  | -5.786840658 | 11.093739783  | -0.908882612 |
| H366  | -5.792873098 | 5.940376209   | -4.827202903 |
| H367  | 2.514118365  | -0.900309943  | 0.342558960  |
| H368  | 0.239553972  | -1.296794135  | 0.447431181  |
| H369  | -0.967899724 | -0.032998443  | -1.088901194 |
| H370  | 1.196115303  | 0.939760912   | -0.387044560 |
| Mo371 | 4.194610382  | -4.593587341  | -0.447008040 |
| N372  | -6.588995650 | -7.209604570  | 0.348352617  |
| N373  | -8.940431625 | -4.402486081  | 1.114802194  |
| N374  | -9.217694848 | -3.911080422  | 3.891366310  |
| N375  | -6.752445767 | -4.757840943  | 4.938397742  |
| N376  | -4.928272363 | -2.937598255  | 3.658039198  |
| N377  | -5.855398177 | -0.509132940  | 4.831755460  |
| N378  | -5.700674735 | -0.950365395  | 7.691919105  |
| N379  | -3.204054272 | -2.226109599  | 8.324898900  |
| N380  | -1.170873757 | -1.001624650  | 6.894144165  |
| N381  | -1.511224865 | 1.906435057   | 6.287057071  |
| N382  | -2.705518297 | 2.726876162   | 8.816423826  |
| N383  | 4.474722115  | -8.808255207  | 9.410679380  |
| N384  | 5.439149121  | -7.121465414  | 7.561989070  |
| N385  | 4.614881591  | -1.823225622  | 4.361055416  |
| N386  | 3.501794055  | -0.117520062  | 5.514119619  |
| N387  | 4.194466963  | 0.203280817   | 3.314944899  |
| N388  | 8.212432745  | -4.985913476  | 7.167302577  |
| N389  | -5.255306624 | -3.812549172  | -2.751167642 |
| N390  | -1.211312391 | -6.062133138  | -1.615620774 |
| N391  | -5.627522030 | -1.218334400  | -2.948168790 |
| N392  | -8.118660221 | -0.171623239  | -2.380064463 |
| N393  | -7.906192999 | 0.527744194   | 0.289181390  |
| N394  | -5.784908591 | 2.386622454   | 0.607270695  |
| N395  | -2.717165340 | 2.262816612   | -2.365094020 |

|      |               |              |              |
|------|---------------|--------------|--------------|
| N396 | -1.666941121  | 0.722943304  | -1.272006959 |
| N397 | -6.597859922  | 5.012980362  | 0.196483929  |
| N398 | -9.589168932  | 7.220083879  | -2.754339573 |
| N399 | -9.834395081  | 9.310034796  | -2.050264460 |
| N400 | 8.630859636   | 3.533802258  | 3.701116418  |
| N401 | 6.422066960   | 7.513613426  | -1.234635965 |
| N402 | 4.902891029   | 7.577958637  | -4.425862142 |
| N403 | 2.446506915   | 6.454698921  | -5.093090922 |
| N404 | -1.863082639  | 4.555550832  | -6.588591574 |
| N405 | -1.530305911  | 5.984431083  | -8.412167512 |
| N406 | -3.078124818  | 6.529361086  | -6.776899341 |
| N407 | 1.008524119   | 5.965635396  | -2.669471473 |
| N408 | 0.972780362   | 8.563499230  | -1.621483451 |
| N409 | -0.236610200  | 10.769682222 | -2.928119604 |
| N410 | -1.056337746  | 9.020088284  | -5.564450776 |
| N411 | -2.815721383  | 11.620655233 | -2.451586458 |
| N412 | 5.756859815   | -7.037924428 | -7.891056346 |
| N413 | 3.800360960   | -4.436038548 | -6.334169346 |
| N414 | 2.543844996   | -1.667314543 | -6.750490200 |
| N415 | 4.498966070   | 0.382268297  | -7.115844800 |
| N416 | 0.100081381   | -5.795810834 | -8.907905095 |
| N417 | -1.750468976  | -3.705938294 | -8.196423333 |
| N418 | 9.137178037   | -7.755080301 | -2.227285196 |
| N419 | 4.998839716   | -6.422560080 | -1.810858964 |
| N420 | 4.826390521   | -7.865604737 | -3.474055820 |
| N421 | 9.590574770   | -7.510956657 | 0.926559430  |
| O422 | -6.777991230  | -4.713136727 | 1.757100779  |
| O423 | -8.199604163  | -1.894800237 | 3.584750205  |
| O424 | -7.120317094  | -3.437484302 | 6.767702355  |
| O425 | -3.681746187  | -3.106503566 | 5.552682785  |
| O426 | -3.744712096  | 0.306547495  | 4.586314859  |
| O427 | -5.102127827  | 1.251521169  | 7.822801207  |
| O428 | -3.362378746  | -1.337070590 | 10.436662717 |
| O429 | 0.439527321   | -2.277399154 | 7.928286568  |
| O430 | 0.696798966   | 1.837850050  | 6.872848082  |
| O431 | -1.102078961  | 4.333810022  | 8.787438477  |
| O432 | -1.492098409  | 3.304678821  | 12.140717491 |
| O433 | 6.316688078   | -8.822802965 | 6.261391662  |
| O434 | 6.817055636   | -5.108070308 | 8.989871085  |
| O435 | 10.717413860  | -2.462467100 | 7.643749652  |
| O436 | -5.406970696  | -0.809164375 | -0.702680788 |
| O437 | -2.964953397  | -5.503262061 | -2.952667375 |
| O438 | -7.520964014  | 1.897926754  | -3.149379473 |
| O439 | -5.621744486  | 1.852396388  | -5.072327712 |
| O440 | -10.012185357 | 1.449296465  | 0.266434434  |
| O441 | -6.387661260  | 2.723078927  | 2.783543352  |
| O442 | -4.826196552  | 5.749024657  | 1.441536461  |
| O443 | -7.482468316  | 8.105951485  | 1.654847005  |
| O444 | 9.101461161   | 1.240989731  | 6.347218473  |
| O445 | 2.759305262   | 6.065224260  | 2.988675442  |
| O446 | 3.867263238   | 8.279156483  | -2.520794773 |
| O447 | 1.742428355   | 8.430994936  | -6.035785457 |
| O448 | -0.898405294  | 6.162527570  | -3.923223835 |
| O449 | -0.841404042  | 8.017844913  | -0.327249532 |
| O450 | 2.119547219   | 6.264478990  | 0.174372935  |
| O451 | 0.643914692   | 12.219353768 | -1.391192731 |
| O452 | -2.608173813  | 13.391242935 | -3.875111594 |
| O453 | -2.888312061  | 10.380299918 | -5.663432031 |
| O454 | -5.317948417  | 13.845287609 | -1.159661557 |
| O455 | -4.920767648  | 6.020590563  | -4.394716974 |
| O456 | 3.280857222   | -6.643889908 | -6.710738745 |

|  |                        |               |               |              |
|--|------------------------|---------------|---------------|--------------|
|  | O457                   | 1.189231037   | -3.118232281  | -7.896332308 |
|  | O458                   | 3.115255331   | 1.448376243   | -8.591734825 |
|  | O459                   | 7.728713351   | 1.580422368   | -8.214051060 |
|  | O460                   | -3.353530229  | -5.318232377  | -8.401967055 |
|  | O461                   | -0.282330014  | -7.951846719  | -3.927790612 |
|  | O462                   | 1.723744951   | -7.314227187  | -4.669971133 |
|  | O463                   | -2.547532012  | -0.348420732  | -9.109743573 |
|  | O464                   | 10.415954844  | -5.659647622  | -0.084774782 |
|  | O465                   | 12.844185728  | -6.730487753  | 2.223510070  |
|  | O466                   | -0.110254757  | -5.972177816  | 1.283595843  |
|  | O467                   | 0.124956201   | -7.721219688  | 2.638052915  |
|  | O468                   | 5.265750811   | -11.032852507 | 0.984272629  |
|  | O469                   | 3.116066849   | -11.052595071 | 0.288735120  |
|  | O470                   | 5.244347616   | -5.639827563  | 1.251838789  |
|  | O471                   | 4.839975674   | -6.882016899  | 3.087483938  |
|  | O472                   | 2.921832529   | -6.152879720  | 0.148952702  |
|  | O473                   | 8.634047068   | -5.555830936  | 4.410120606  |
|  | O474                   | 7.000933319   | -3.973072592  | 2.712848385  |
|  | O475                   | -3.677310622  | 3.707566084   | -4.538358548 |
|  | O476                   | 7.989381250   | -10.243911054 | 2.288200993  |
|  | O477                   | 7.251648106   | -7.916496393  | 3.813268922  |
|  | S478                   | 4.015432077   | 4.530302677   | -2.787005405 |
|  | S479                   | 2.218719554   | 1.152913945   | -3.020496783 |
|  | S480                   | 2.688502941   | -3.928588878  | -2.152532980 |
|  | S481                   | 3.437108031   | 1.725884889   | 0.134982865  |
|  | S482                   | 0.556961089   | -1.598335761  | -0.847078390 |
|  | S483                   | 4.787898186   | -1.761067274  | -4.435620910 |
|  | S484                   | 3.548037717   | -3.091906367  | 1.291639193  |
|  | S485                   | 5.847425333   | 1.253814307   | -2.509306618 |
|  | S486                   | 6.241299177   | -3.594067667  | -1.207300536 |
|  | S487                   | 6.355296952   | -0.532047430  | 0.987441040  |
|  | <b>12u</b>             |               |               |              |
|  | Fe( 139)               | 0.553         | -2.293        |              |
|  | Fe( 140)               | 0.297         | -0.672        |              |
|  | Fe( 141)               | 0.520         | -2.407        |              |
|  | Fe( 142)               | 0.563         | 2.781         |              |
|  | Fe( 143)               | 0.555         | 2.881         |              |
|  | Fe( 144)               | 0.526         | 2.377         |              |
|  | Fe( 145)               | 0.419         | -1.305        |              |
|  | <b>S=1</b>             |               |               |              |
|  | bm2cnx2b262hx35u.car_3 |               |               |              |
|  | C1                     | -7.869900487  | -4.329471808  | -2.671058140 |
|  | C2                     | -7.792351673  | -5.362019291  | -3.801345411 |
|  | C3                     | -9.105805242  | -2.414537845  | -1.748366137 |
|  | C4                     | -9.278948738  | -2.875288419  | -0.302857806 |
|  | C5                     | -10.101113648 | -4.582932015  | 1.234669942  |
|  | C6                     | -8.785194586  | -5.009324973  | 1.894625393  |
|  | C7                     | -6.501076384  | -5.824270118  | 1.543625922  |
|  | C8                     | -5.671898479  | -4.590764381  | 1.911009978  |
|  | C9                     | -5.022317811  | -2.309275144  | 1.357129992  |
|  | C10                    | -5.542413162  | -1.606576894  | 2.620670808  |
|  | C11                    | -7.456911397  | -0.998211927  | 3.990769774  |
|  | C12                    | -7.221095004  | -1.781774274  | 5.290098040  |
|  | C13                    | -7.431352254  | -3.933203643  | 6.438605439  |
|  | C14                    | -6.075953106  | -4.507799472  | 6.870495735  |
|  | C15                    | -3.923665261  | -5.447339811  | 6.134456774  |
|  | C16                    | -2.664136979  | -4.582705892  | 6.015759723  |
|  | C17                    | -1.755426784  | -2.404017848  | 5.247608991  |
|  | C18                    | -1.869866282  | -1.159507345  | 6.147590325  |
|  | C19                    | -1.627612843  | -2.072193915  | 3.735566438  |
|  | C20                    | -0.582009614  | -0.983588169  | 3.473884643  |
|  | C21                    | -1.314542695  | -3.343431771  | 2.938107364  |
|  | C22                    | -3.222026823  | 0.782494085   | 6.832785358  |
|  | C23                    | -3.722130419  | 0.396272640   | 8.239130979  |
|  | C24                    | -4.159608648  | 1.793704389   | 6.130177601  |
|  | C25                    | -4.470869435  | 2.981999460   | 7.047412694  |
|  | C26                    | -3.541190554  | 2.280588854   | 4.812683462  |
|  | C27                    | -5.352311788  | -0.788248577  | 9.593486731  |
|  | C28                    | -4.330184710  | -1.330645693  | 10.571055285 |



|     |              |               |              |
|-----|--------------|---------------|--------------|
| C29 | 2.683139516  | -12.212272470 | 4.788828493  |
| C30 | 3.574609337  | -11.008788454 | 4.491044037  |
| C31 | 4.031856477  | -8.657967000  | 5.210996324  |
| C32 | 4.849733062  | -8.507640012  | 6.508742600  |
| C33 | 3.026598202  | -7.505197232  | 5.032805093  |
| C34 | 3.683662139  | -6.125872448  | 4.929754244  |
| C35 | 2.688397998  | -5.080621264  | 4.428915025  |
| C36 | 2.850130484  | -2.594004066  | 4.672962538  |
| C37 | 7.040728729  | -7.962066950  | 7.458429927  |
| C38 | 7.384975760  | -6.521368239  | 7.769416439  |
| C39 | -4.389328063 | -1.727002956  | -3.651098327 |
| C40 | -4.749829845 | -0.272017432  | -3.307953752 |
| C41 | -3.005909595 | -2.040054299  | -3.046809480 |
| C42 | -2.595300667 | -3.527054494  | -3.037707809 |
| C43 | -1.846456715 | -4.002916056  | -4.279373152 |
| C44 | -4.837677859 | 2.004018534   | -4.224628456 |
| C45 | -6.271521220 | 2.512565282   | -4.020454451 |
| C46 | -4.152583205 | 2.768439680   | -5.373107486 |
| C47 | -8.590555783 | 1.898204194   | -3.519138609 |
| C48 | -8.730409918 | 1.811892221   | -1.991059153 |
| C49 | -7.692437955 | 1.115435041   | 0.128800294  |
| C50 | -6.701421281 | 2.007153648   | 0.877787559  |
| C51 | -4.719810280 | 3.446582534   | 0.826548513  |
| C52 | -5.352078050 | 4.760385653   | 1.353458952  |
| C53 | -3.587085050 | 3.886617737   | -0.114343633 |
| C54 | -2.668610459 | 2.837193642   | -0.666129402 |
| C55 | -2.255154331 | 1.592987186   | -0.250778024 |
| C56 | -1.114661598 | 2.087416353   | -2.086401706 |
| C57 | -6.938698189 | 6.577291149   | 0.819521972  |
| C58 | -7.567223745 | 6.629732654   | 2.210251236  |
| C59 | -8.007239683 | 6.825645286   | -0.270938981 |
| C60 | -8.370589499 | 8.261332791   | -0.525691326 |
| C61 | -8.624621233 | 9.298863147   | 0.350838401  |
| C62 | -8.839265050 | 9.987449472   | -1.744055877 |
| C63 | 6.643569136  | -0.057242659  | 7.205759915  |
| C64 | 7.425033084  | -1.353237032  | 7.317575869  |
| C65 | 5.433278155  | -0.345188018  | 6.278546744  |
| C66 | 4.514468976  | 0.843467763   | 6.126905158  |
| C67 | 3.451752119  | 1.057930906   | 7.024718971  |
| C68 | 4.699577710  | 1.778106766   | 5.092556272  |
| C69 | 2.601237215  | 2.161482590   | 6.896736439  |
| C70 | 3.866482428  | 2.890102805   | 4.958318841  |
| C71 | 2.815065439  | 3.079174861   | 5.860501155  |
| C72 | 6.202963288  | 6.443500315   | 1.857160553  |
| C73 | 5.446180471  | 7.627467281   | 1.244450609  |
| C74 | 5.320406999  | 5.189854146   | 1.820395076  |
| C75 | 5.304470535  | 9.201664773   | -0.636841709 |
| C76 | 3.987151736  | 8.878557072   | -1.345251583 |
| C77 | 2.442501971  | 7.107088023   | -2.110886787 |
| C78 | 1.329416420  | 6.908292958   | -1.061302261 |
| C79 | 2.725678399  | 5.841053493   | -2.942922730 |
| C80 | 1.546748646  | 5.191456710   | -3.676095311 |
| C81 | 0.972524632  | 5.945003212   | -4.888336540 |
| C82 | -0.242870908 | 8.124135636   | -4.789568666 |
| C83 | 0.686507774  | 6.206839220   | 1.181770090  |
| C84 | 0.427816924  | 7.486778335   | 2.005228490  |
| C85 | 1.018957371  | 5.064627984   | 2.153788424  |
| C86 | 1.466177885  | 9.408126737   | 3.108514224  |
| C87 | 1.070081244  | 10.836272133  | 2.745997978  |
| C88 | 0.347117700  | 12.416769853  | 1.003823770  |
| C89 | -1.099927200 | 12.895424469  | 1.253967071  |

|       |              |               |              |
|-------|--------------|---------------|--------------|
| C90   | 0.731756022  | 12.583243660  | -0.484244511 |
| C91   | -0.109413840 | 11.693025985  | -1.389757572 |
| C92   | -3.406702642 | 12.231803135  | 1.781209365  |
| C93   | -3.652236373 | 13.165961513  | 2.959508804  |
| C94   | -4.197325741 | 10.911640852  | 1.979888474  |
| C95   | -4.106894646 | 10.006454949  | 0.772567514  |
| C96   | -4.971240451 | 10.192719332  | -0.318604647 |
| C97   | -3.125837841 | 9.006378821   | 0.678657722  |
| C98   | -4.851477969 | 9.421849580   | -1.477499416 |
| C99   | -2.974029088 | 8.242481947   | -0.483959725 |
| C100  | -3.838977330 | 8.464664019   | -1.553294372 |
| C101  | 7.048775768  | -3.592505077  | -7.205991320 |
| C102  | 5.570472959  | -3.245237465  | -7.227125917 |
| C103  | 3.837205072  | -1.717427478  | -6.311079834 |
| C104  | 3.643000748  | -0.305050984  | -6.871056613 |
| C105  | 4.061882383  | 2.076451899   | -6.481536557 |
| C106  | 5.196429175  | 2.999178089   | -6.047565993 |
| C107  | 7.204298942  | 3.373013197   | -4.695981743 |
| C108  | 8.516528997  | 3.266549805   | -5.447053228 |
| C109  | 0.893174465  | -2.500757589  | -9.797318640 |
| C110  | -0.090558367 | -1.324158127  | -9.792702712 |
| C111  | 0.759450647  | -3.289722516  | -8.475758771 |
| C112  | 1.409942142  | -4.680888249  | -8.586306611 |
| C113  | 1.556355754  | -5.308291716  | -7.218317630 |
| C114  | -0.565942463 | 0.954871797   | -9.045758377 |
| C115  | 0.188569749  | 2.240677380   | -9.319550132 |
| C116  | -1.422103439 | 0.961648284   | -7.756768377 |
| C117  | -0.616833676 | 0.700358035   | -6.507840382 |
| C118  | 0.098328044  | 1.728698203   | -5.872092303 |
| C119  | -0.506173698 | -0.604724129  | -5.997172598 |
| C120  | 0.920402250  | 1.445748072   | -4.775749170 |
| C121  | 0.312582181  | -0.885892859  | -4.898547586 |
| C122  | 1.040720578  | 0.139895792   | -4.288185355 |
| C123  | 8.529858659  | -6.693727181  | -1.784148879 |
| C124  | 9.203003098  | -7.044077594  | -0.445745286 |
| C125  | 7.033600931  | -7.050061984  | -1.798078855 |
| C126  | 6.262506482  | -6.605265307  | -3.005390596 |
| C127  | 6.422623961  | -7.040351619  | -4.305840139 |
| C128  | 4.653145209  | -5.714171823  | -4.186121006 |
| C129  | 9.582402633  | -8.649087349  | 1.346886437  |
| C130  | 11.089712386 | -8.540873886  | 1.276300159  |
| C131  | -0.055060365 | -6.978133282  | -0.570965935 |
| C132  | 1.220692490  | -6.810083531  | 0.209772186  |
| C133  | 2.513119430  | -7.035765010  | -0.669377082 |
| C134  | 2.447647123  | -8.440463671  | -1.339912058 |
| C135  | 3.753550356  | -8.828813436  | -2.053405772 |
| C136  | 3.811649394  | -10.271195419 | -2.477554825 |
| C137  | 3.716981260  | -7.060229107  | 0.322590243  |
| C138  | 4.254959669  | -0.936616930  | -0.725831986 |
| Fe139 | 4.913558106  | -2.067311221  | -2.194257309 |
| Fe140 | 3.006792333  | 0.473587893   | -0.316558307 |
| Fe141 | 5.212617777  | 0.035500489   | 0.799815554  |
| Fe142 | 5.084360644  | 0.503477986   | -1.804210662 |
| Fe143 | 4.599240245  | 2.485173201   | -0.018974057 |
| Fe144 | 4.841088676  | -2.478225241  | 0.379514971  |
| Fe145 | 2.606271365  | -2.057712319  | -0.905075672 |
| H146  | -6.256962157 | -6.463102932  | -3.031387593 |
| H147  | -5.789759325 | -5.426985718  | -4.204867005 |
| H148  | -9.545658774 | -3.503210364  | -3.534594303 |
| H149  | -8.042554140 | -4.872648508  | -4.756220844 |
| H150  | -8.603414087 | -6.088450166  | -3.616136967 |

|      |               |              |               |
|------|---------------|--------------|---------------|
| H151 | -8.234047522  | -1.744924704 | -1.755183839  |
| H152 | -10.284291194 | -4.560403573 | -0.911023161  |
| H153 | -9.990069305  | -1.828203145 | -2.032520340  |
| H154 | -10.769425913 | -5.453236027 | 1.181593406   |
| H155 | -7.974151473  | -5.422541951 | 0.055210621   |
| H156 | -10.560912439 | -3.833677943 | 1.892757710   |
| H157 | -3.955237820  | -2.507150143 | 1.521462798   |
| H158 | -6.228824127  | -3.637125316 | 0.160520415   |
| H159 | -5.982052387  | -6.399499123 | 0.764850992   |
| H160 | -7.027536742  | 0.001559836  | 4.133161026   |
| H161 | -7.502848414  | -2.029038122 | 2.102231546   |
| H162 | -6.566823027  | -6.444180536 | 2.445547216   |
| H163 | -5.116548036  | -1.632025693 | 0.495163492   |
| H164 | -7.797548918  | -3.547341442 | 4.371859873   |
| H165 | -8.539639190  | -0.898725173 | 3.834639388   |
| H166 | -2.091150775  | -4.109813996 | 3.075907485   |
| H167 | -1.247745384  | -3.116950301 | 1.863231643   |
| H168 | -0.348744242  | -3.773500961 | 3.247281949   |
| H169 | -2.606706486  | -1.688498115 | 3.406475708   |
| H170 | -8.117651912  | -4.779636163 | 6.289943701   |
| H171 | -3.383737001  | 1.458466413  | 4.099131049   |
| H172 | -5.281153238  | -0.752361936 | 7.463942684   |
| H173 | -4.990588163  | 2.675277316  | 7.966154666   |
| H174 | -0.584679450  | -0.708746243 | 2.409195769   |
| H175 | 0.432809830   | -1.330272266 | 3.708228329   |
| H176 | 6.248947052   | 0.179570134  | 8.212099479   |
| H177 | -4.201886537  | 3.021433185  | 4.337874422   |
| H178 | -5.108973091  | 3.706374821  | 6.520768003   |
| H179 | -2.568399736  | 2.765770886  | 4.998170939   |
| H180 | -3.543983999  | 3.497747826  | 7.343634556   |
| H181 | -5.109186037  | 1.276474200  | 5.901997626   |
| H182 | -2.247270677  | 1.261062177  | 7.007091755   |
| H183 | -3.658175672  | -0.612443011 | 5.254169135   |
| H184 | -0.774767092  | -0.068128809 | 4.051790653   |
| H185 | 1.336167615   | 4.183002717  | 1.568469465   |
| H186 | 0.092810379   | 4.814623302  | 2.695084878   |
| H187 | 1.936429299   | 4.976978773  | 3.892995879   |
| H188 | 1.281494893   | 4.175916898  | 6.321137901   |
| H189 | 4.007534816   | 3.590792265  | 4.134182768   |
| H190 | 5.489161404   | 1.618322538  | 4.354936263   |
| H191 | 3.277349080   | 0.348302758  | 7.838784827   |
| H192 | -3.789287796  | -3.088068646 | 5.211293412   |
| H193 | -3.795725630  | -6.287412634 | 5.435173247   |
| H194 | -3.945561354  | -5.856318965 | 7.152583166   |
| H195 | -5.469781668  | -4.684007528 | 4.892258764   |
| H196 | -7.799674568  | -3.339290879 | 7.285433175   |
| H197 | 1.769105215   | 2.301722867  | 7.592767564   |
| H198 | -0.842331811  | -2.913443838 | 5.583078466   |
| H199 | -5.864167095  | 0.071179158  | 10.055793244  |
| H200 | -6.098037777  | -1.583256121 | 9.436106164   |
| H201 | -3.445271506  | -1.824095206 | 10.104493973  |
| H202 | 7.969712085   | -8.530951485 | 7.300697180   |
| H203 | -0.294369541  | -5.210580052 | -4.859469272  |
| H204 | -0.115135334  | -8.799432262 | 0.063987130   |
| H205 | 0.771499317   | -5.333818296 | -9.199284438  |
| H206 | 2.393601618   | -4.602010272 | -9.072817764  |
| H207 | -0.300395351  | -3.414139423 | -8.205598854  |
| H208 | 1.038729654   | 2.126610789  | -10.033991006 |
| H209 | 0.524777210   | -3.143791788 | -10.611759582 |
| H210 | -2.245855865  | -1.439613443 | -3.570769188  |
| H211 | -3.487178103  | -4.170306929 | -2.933790692  |

|      |              |              |               |
|------|--------------|--------------|---------------|
| H212 | 1.239535143  | -0.157714217 | -8.704646624  |
| H213 | -1.265775203 | 0.866456727  | -9.901309902  |
| H214 | 2.714811044  | -1.597242512 | -9.384367484  |
| H215 | -0.535021747 | -5.109720029 | -3.115509001  |
| H216 | 1.223980674  | -2.703782498 | -7.668002495  |
| H217 | 2.815102885  | -2.891457346 | -10.394762855 |
| H218 | -5.308110673 | -2.344889043 | -5.396815926  |
| H219 | -3.016376726 | -1.689234643 | -2.005329974  |
| H220 | 3.432661699  | -4.707817730 | -7.209558561  |
| H221 | -1.967496478 | -3.705921847 | -2.154013985  |
| H222 | -4.317044710 | 2.930225878  | 1.710359825   |
| H223 | -2.564408904 | 0.990476612  | 0.596608877   |
| H224 | -8.692045244 | 1.386040921  | 0.490517844   |
| H225 | -6.898270142 | 0.841829930  | -1.833633752  |
| H226 | -6.724631773 | 4.678526064  | -0.163636454  |
| H227 | -8.601187721 | 9.363895102  | 1.432894358   |
| H228 | -8.029268203 | 5.666259600  | 2.533670347   |
| H229 | -8.905427988 | 6.224456922  | -0.041028057  |
| H230 | -6.151117973 | 7.344754735  | 0.761278273   |
| H231 | -9.026157335 | 10.659650539 | -2.577260850  |
| H232 | -2.980669171 | 4.614233232  | 0.450162302   |
| H233 | -4.025176695 | 4.446442094  | -0.956434786  |
| H234 | -9.143395905 | 11.321220815 | -0.113232112  |
| H235 | -7.606080588 | 6.437978866  | -1.221533527  |
| H236 | -5.482976763 | 2.227634054  | -0.776102981  |
| H237 | -7.515515830 | 0.072505914  | 0.431577257   |
| H238 | -8.868554717 | 2.919753144  | -3.808125165  |
| H239 | -0.428550087 | 2.009522968  | -2.923667851  |
| H240 | -9.316769431 | 1.209968829  | -3.971697339  |
| H241 | 8.169877239  | 1.305542353  | 7.333102784   |
| H242 | 6.940579166  | 1.787755396  | 6.368991478   |
| H243 | 2.619292127  | 5.924911611  | 0.243048781   |
| H244 | -0.271435317 | 5.969468394  | 0.696374383   |
| H245 | 2.358230989  | 8.114445563  | 1.696789206   |
| H246 | -2.026168001 | 3.998550028  | -2.373524716  |
| H247 | -3.010860879 | 5.037947446  | -4.091005461  |
| H248 | -2.976774723 | 6.197908432  | -3.005708218  |
| H249 | -3.110068554 | 2.434172734  | -5.462827863  |
| H250 | -4.668863220 | 2.568806798  | -6.327062103  |
| H251 | 1.805180933  | 12.371392169 | -0.588843999  |
| H252 | 0.549278002  | 13.630253622 | -0.759155104  |
| H253 | 1.462620043  | 10.307392935 | -1.629480797  |
| H254 | -0.097441043 | 9.851603937  | -2.273683316  |
| H255 | 0.586465448  | 9.774705557  | -5.674718029  |
| H256 | 0.618227392  | 5.224564310  | -5.640931870  |
| H257 | -5.542046605 | 9.569218737  | -2.311361265  |
| H258 | -2.456256095 | 8.801908335  | 1.520148671   |
| H259 | -1.955087567 | 8.386648142  | -3.669202950  |
| H260 | 3.162790097  | 5.076713352  | -2.280025281  |
| H261 | 4.304424369  | 6.858202127  | -1.088526924  |
| H262 | 0.733038581  | 4.952312201  | -2.972664255  |
| H263 | -7.016899392 | 0.637777565  | -4.257562038  |
| H264 | 6.003117698  | 9.588924985  | -1.390855620  |
| H265 | -4.473992831 | 0.086304022  | -5.254669439  |
| H266 | 3.508436396  | 6.101079011  | -3.675441740  |
| H267 | -2.161870192 | 7.517988776  | -0.567982942  |
| H268 | -5.029284884 | 4.376916102  | -4.710846817  |
| H269 | 5.086078478  | 10.016622962 | 0.068071698   |
| H270 | 1.261402813  | 8.267883050  | -6.188170748  |
| H271 | -1.518368252 | 9.714684054  | -4.677944352  |
| H272 | -3.653732166 | -2.570957006 | -5.380717089  |

|      |              |               |              |
|------|--------------|---------------|--------------|
| H273 | -5.136614252 | -2.345726975  | -3.118605283 |
| H274 | -5.754760954 | 10.951575138  | -0.265437192 |
| H275 | -4.326433346 | 2.288795565   | -3.288505913 |
| H276 | 2.082565300  | 7.916584859   | -2.759760350 |
| H277 | 1.765073916  | 6.532867939   | -5.367806361 |
| H278 | 1.921230262  | 4.226848392   | -4.045146135 |
| H279 | -0.962342473 | 6.363522432   | -4.082786283 |
| H280 | 0.795112132  | 9.094172958   | 3.921980048  |
| H281 | 0.680498756  | 10.294480059  | 0.803385882  |
| H282 | 0.975196253  | 13.097412193  | 1.597426130  |
| H283 | 2.484778485  | 9.460394122   | 3.517158608  |
| H284 | -1.657008798 | 10.986659058  | 1.710070440  |
| H285 | 7.645969242  | -2.686680345  | -7.028072774 |
| H286 | 7.189313264  | -4.245394557  | -6.319429911 |
| H287 | 8.628580033  | -5.602979888  | -1.879701674 |
| H288 | 8.369888075  | -4.634480778  | -8.358575062 |
| H289 | 6.797573623  | -4.967081263  | -8.684375554 |
| H290 | 5.904576536  | 4.347960554   | 2.213556766  |
| H291 | 5.784427112  | 7.016168046   | 3.768897477  |
| H292 | 6.728109385  | 7.631963047   | -0.363479292 |
| H293 | 4.431023695  | 5.347306112   | 2.446688174  |
| H294 | 7.263924773  | 7.495915532   | 3.262886441  |
| H295 | 7.375361727  | 3.144757724   | -3.633024029 |
| H296 | 7.111770387  | 6.249275154   | 1.266700036  |
| H297 | 2.307155319  | -7.526985888  | 5.867891424  |
| H298 | 4.704245740  | -8.686363761  | 4.344811246  |
| H299 | 6.096281723  | 1.563732574   | -4.836112926 |
| H300 | 3.137271107  | -0.582487770  | 4.555925866  |
| H301 | 4.009794706  | 2.119116166   | -7.577545228 |
| H302 | 0.391865540  | -1.906158440  | -4.517122995 |
| H303 | 3.129363165  | 2.533811470   | -6.109748182 |
| H304 | 1.847664935  | -4.968057329  | 5.125622312  |
| H305 | 4.471628986  | 0.406776113   | -5.149091444 |
| H306 | 2.261487423  | -5.403740829  | 3.465176692  |
| H307 | 2.465669702  | -7.716690594  | 4.108148683  |
| H308 | 4.529361438  | -6.158223199  | 4.226621955  |
| H309 | 4.085660202  | -5.807945713  | 5.904856747  |
| H310 | -2.192682154 | 0.186380970   | -7.873354556 |
| H311 | 2.613606027  | -10.085486613 | 5.979621098  |
| H312 | 1.994124336  | -12.301888658 | 3.934918901  |
| H313 | 1.688465434  | -0.062780377  | -3.431943117 |
| H314 | 2.421502705  | -12.458812721 | 6.818552157  |
| H315 | 1.033694311  | -12.601719381 | 5.957623841  |
| H316 | 3.974250134  | -3.711117290  | 3.438015908  |
| H317 | 1.493219117  | 2.235822978   | -4.285418911 |
| H318 | -1.072459372 | -1.414864015  | -6.460917566 |
| H319 | 6.640917856  | -10.594142160 | 0.643006448  |
| H320 | 6.930322906  | -8.147183465  | -1.717730473 |
| H321 | 5.253758712  | -8.849690062  | 1.637421957  |
| H322 | 6.315508020  | -11.140199013 | -0.761755224 |
| H323 | 8.469035012  | 2.718106106   | -6.419096850 |
| H324 | 5.576797646  | -5.703592625  | 1.638710548  |
| H325 | 1.251442461  | -7.493007356  | 1.071335623  |
| H326 | 5.907151558  | -1.719052325  | -5.894996786 |
| H327 | 2.235881166  | -9.180978791  | -0.552711509 |
| H328 | 5.213325196  | -6.606092214  | -6.019442209 |
| H329 | 3.768947745  | -5.171907121  | -4.495451429 |
| H330 | 3.338965218  | -13.099592856 | 4.757865106  |
| H331 | 3.889024310  | -1.489849318  | 3.278557734  |
| H332 | 6.907361922  | -6.812433017  | 3.322867564  |
| H333 | 6.423332858  | -4.537931148  | 2.218982500  |

|       |              |               |              |
|-------|--------------|---------------|--------------|
| H334  | 6.506131249  | -7.952315816  | 5.373162557  |
| H335  | 1.974749330  | -3.316102619  | 6.393085365  |
| H336  | 2.936431608  | -11.560558899 | -3.551263570 |
| H337  | 3.876809661  | -8.195751331  | -2.944171443 |
| H338  | 4.615335731  | -8.665576478  | -1.397581453 |
| H339  | 1.618622554  | -8.453514615  | -2.061474895 |
| H340  | 3.593897018  | -1.748838111  | -5.237399379 |
| H341  | 0.020334292  | 2.747925941   | -6.257341655 |
| H342  | -1.925998116 | 1.939444443   | -7.713188544 |
| H343  | 1.268723461  | -5.772053698  | 0.563156929  |
| H344  | 6.842184955  | -8.346545654  | 3.102827551  |
| H345  | 5.443429449  | -10.056274927 | 2.597814664  |
| H346  | 1.644289284  | -1.656740853  | 6.054679545  |
| H347  | 7.162245784  | -7.694583113  | -4.753748226 |
| H348  | 6.557792829  | -6.623537548  | -0.906653265 |
| H349  | 3.176183462  | -2.394459584  | -6.855395671 |
| H350  | 6.869613319  | 4.420371658   | -4.767950985 |
| H351  | 4.881366741  | -1.193059716  | 6.711954024  |
| H352  | 5.817469187  | -0.657196445  | 5.294007928  |
| H353  | 10.217655024 | -6.967029825  | -2.915661469 |
| H354  | 9.311214142  | -8.320507179  | -2.779385585 |
| H355  | 9.337749544  | -9.706969979  | 1.533362657  |
| H356  | 8.248298789  | -8.901461700  | -0.294122174 |
| H357  | 11.524230767 | -8.635562621  | 0.252118730  |
| H358  | 9.209426461  | -8.064140790  | 2.202726094  |
| H359  | 8.142721523  | -1.530710155  | 6.480732103  |
| H360  | -2.849090530 | 13.169889088  | 3.734999824  |
| H361  | 6.539513780  | -8.373260865  | 8.351993836  |
| H362  | 6.635015020  | -5.766044966  | 7.429261648  |
| H363  | -3.776630862 | 12.738655550  | 0.875815919  |
| H364  | -3.822846139 | 10.397329643  | 2.878945622  |
| H365  | -5.244525338 | 11.187295917  | 2.171326305  |
| H366  | -4.364891578 | 7.907258900   | -3.345827858 |
| H367  | 2.084766568  | -0.808569264  | 0.101651422  |
| H368  | 0.002589203  | -1.808135270  | 0.083350574  |
| H369  | -0.747055858 | 0.248218206   | -1.124288439 |
| H370  | 1.527090514  | 0.827418106   | -0.267139114 |
| Mo371 | 4.003959800  | -4.468223958  | -1.243690360 |
| N372  | -6.534147818 | -6.075091847  | -3.936770062 |
| N373  | -8.944032384 | -3.491284007  | -2.714247579 |
| N374  | -9.931718605 | -4.046873656  | -0.106922979 |
| N375  | -7.835293243 | -5.501790786  | 1.061109775  |
| N376  | -5.728666666 | -3.544687750  | 1.046668131  |
| N377  | -6.884262195 | -1.626743358  | 2.810657182  |
| N378  | -7.447602873 | -3.119752801  | 5.233514055  |
| N379  | -5.190471089 | -4.786706412  | 5.872619191  |
| N380  | -2.848236499 | -3.335064559  | 5.509862559  |
| N381  | -2.992876015 | -0.400309211  | 6.000171349  |
| N382  | -4.772212143 | -0.463045072  | 8.302538708  |
| N383  | 1.904632021  | -12.073576449 | 6.025072833  |
| N384  | 3.324151381  | -9.930711386  | 5.255828646  |
| N385  | 3.314007386  | -3.768774212  | 4.218523883  |
| N386  | 2.010517228  | -2.547937418  | 5.731362149  |
| N387  | 3.174979714  | -1.458743801  | 4.037928400  |
| N388  | 6.135515997  | -8.112438471  | 6.335210002  |
| N389  | -4.420963790 | -1.928406933  | -5.106120595 |
| N390  | -0.815924414 | -4.840891738  | -4.059758266 |
| N391  | -4.717144791 | 0.569809064   | -4.373166106 |
| N392  | -7.262156256 | 1.596392654   | -4.021520462 |
| N393  | -7.697951583 | 1.224671183   | -1.318939247 |
| N394  | -5.699779397 | 2.599262605   | 0.147736094  |

|      |              |               |               |
|------|--------------|---------------|---------------|
| N395 | -1.938817379 | 3.114630413   | -1.818506070  |
| N396 | -1.295859818 | 1.154918584   | -1.147815053  |
| N397 | -6.364874404 | 5.253289615   | 0.595400812   |
| N398 | -8.507536090 | 8.705131808   | -1.831034204  |
| N399 | -8.918016792 | 10.387136006  | -0.443602035  |
| N400 | 7.506031487  | 0.974983171   | 6.628861465   |
| N401 | 6.610289221  | 6.707418863   | 3.245497273   |
| N402 | 5.933502271  | 8.100985553   | 0.062492827   |
| N403 | 3.695085722  | 7.570942207   | -1.519087134  |
| N404 | -0.156636509 | 6.818413977   | -4.548720216  |
| N405 | 0.672023000  | 8.773079684   | -5.536450392  |
| N406 | -1.229202048 | 8.855365013   | -4.216357823  |
| N407 | 1.688899940  | 6.370899793   | 0.134971293   |
| N408 | 1.441446883  | 8.400198752   | 2.055919999   |
| N409 | 0.619401280  | 11.060314590  | 1.475842818   |
| N410 | 0.458329959  | 10.503348534  | -1.720996655  |
| N411 | -1.987421173 | 11.945299762  | 1.634959042   |
| N412 | 7.449338922  | -4.204921126  | -8.475987904  |
| N413 | 5.211333892  | -2.169166782  | -6.499700680  |
| N414 | 4.139424192  | 0.680045362   | -6.092614224  |
| N415 | 6.160050597  | 2.512091223   | -5.223685226  |
| N416 | 2.248378980  | -2.072146041  | -10.166720033 |
| N417 | 0.326589061  | -0.185130531  | -9.171406957  |
| N418 | 9.251580959  | -7.306408264  | -2.915886957  |
| N419 | 5.148272377  | -5.766467512  | -2.952522280  |
| N420 | 5.401253815  | -6.466487597  | -5.031025520  |
| N421 | 8.942772897  | -8.266386942  | 0.097558519   |
| O422 | -7.047033250 | -4.291722228  | -1.737203431  |
| O423 | -8.846606389 | -2.185886497  | 0.635588635   |
| O424 | -8.631565528 | -4.926003214  | 3.123769028   |
| O425 | -4.998756691 | -4.550125927  | 2.952896871   |
| O426 | -4.767898920 | -1.038706418  | 3.407618055   |
| O427 | -6.887303505 | -1.197737697  | 6.335465077   |
| O428 | -5.858630044 | -4.728063390  | 8.069364124   |
| O429 | -1.565099054 | -5.050001454  | 6.346034537   |
| O430 | -0.976402547 | -0.880891135  | 6.963301605   |
| O431 | -3.194662163 | 0.855900548   | 9.265682870   |
| O432 | -4.482784998 | -1.295630902  | 11.783215966  |
| O433 | 4.432456803  | -11.086417407 | 3.585564449   |
| O434 | 4.331262330  | -8.740630181  | 7.614790191   |
| O435 | 8.398070528  | -6.188603778  | 8.364389660   |
| O436 | -5.050873537 | 0.103393931   | -2.153086456  |
| O437 | -2.180157072 | -3.647462019  | -5.434137666  |
| O438 | -6.462112495 | 3.728417406   | -3.807430770  |
| O439 | -4.140946797 | 4.181054562   | -5.109513424  |
| O440 | -9.751728474 | 2.252728942   | -1.449039353  |
| O441 | -6.829739414 | 2.197157752   | 2.089104622   |
| O442 | -4.878331224 | 5.351441711   | 2.327953634   |
| O443 | -7.615067325 | 7.626864607   | 2.907954928   |
| O444 | 7.282023030  | -2.163860465  | 8.222025058   |
| O445 | 2.004215341  | 4.180291160   | 5.666638904   |
| O446 | 4.450354251  | 8.133723962   | 1.793954319   |
| O447 | 3.273961215  | 9.819341935   | -1.751064916  |
| O448 | 0.164980503  | 7.253802837   | -1.327279482  |
| O449 | -0.645818004 | 7.627499414   | 2.607697394   |
| O450 | 2.043269736  | 5.480287611   | 3.059999708   |
| O451 | 1.145930503  | 11.727432032  | 3.600366653   |
| O452 | -1.405365719 | 14.088347773  | 1.115725684   |
| O453 | -1.261293030 | 12.006482583  | -1.728764991  |
| O454 | -4.662557968 | 13.840274617  | 3.076211638   |
| O455 | -3.637162092 | 7.715205806   | -2.723705812  |

|                       |                        |              |               |               |
|-----------------------|------------------------|--------------|---------------|---------------|
|                       | O456                   | 4.757538907  | -3.963326318  | -7.863225015  |
|                       | O457                   | 3.090077739  | -0.100174085  | -7.973204396  |
|                       | O458                   | 5.178964143  | 4.173581216   | -6.452859068  |
|                       | O459                   | 9.557754706  | 3.754062777   | -5.039623784  |
|                       | O460                   | -1.219752991 | -1.422822760  | -10.301216334 |
|                       | O461                   | 0.630832914  | -5.843382208  | -6.616547625  |
|                       | O462                   | 2.770929744  | -5.215243244  | -6.642060517  |
|                       | O463                   | -0.108990971 | 3.332831624   | -8.856316881  |
|                       | O464                   | 10.028806402 | -6.279038522  | 0.085235526   |
|                       | O465                   | 11.803241227 | -8.433303418  | 2.264178604   |
|                       | O466                   | -0.595200911 | -6.121892012  | -1.253251308  |
|                       | O467                   | -0.642644754 | -8.217708811  | -0.515765810  |
|                       | O468                   | 4.658190569  | -11.087970761 | -2.122785582  |
|                       | O469                   | 2.810220066  | -10.612635428 | -3.330820028  |
|                       | O470                   | 4.595527382  | -6.126916681  | 0.146365689   |
|                       | O471                   | 3.804816486  | -7.961834038  | 1.186673381   |
|                       | O472                   | 2.635387440  | -6.014976271  | -1.595820194  |
|                       | O473                   | 7.199167566  | -7.664292795  | 3.730413360   |
|                       | O474                   | 6.040376017  | -5.402643854  | 2.461613698   |
|                       | O475                   | -2.426758501 | 5.485262026   | -3.415932216  |
|                       | O476                   | 7.032540112  | -11.126019552 | -0.095331607  |
|                       | O477                   | 5.956937731  | -9.465693375  | 1.985300682   |
|                       | S478                   | 4.741079573  | 4.784439161   | 0.108647817   |
|                       | S479                   | 3.344819497  | 1.996322863   | -1.898754911  |
|                       | S480                   | 3.023808373  | -3.062225947  | -2.891722263  |
|                       | S481                   | 3.562667572  | 1.351811715   | 1.613532037   |
|                       | S482                   | 0.290642707  | -1.870866343  | -1.242713190  |
|                       | S483                   | 5.906662566  | -0.604628489  | -3.577560459  |
|                       | S484                   | 2.917319846  | -3.559723347  | 0.703044667   |
|                       | S485                   | 6.594118264  | 1.381710752   | -0.283972471  |
|                       | S486                   | 6.193264290  | -3.533165117  | -1.050903138  |
|                       | S487                   | 5.829053930  | -1.612739350  | 2.164693626   |
| <b>13(a)</b>          | bml2cnx2b262hx47.car_3 |              |               |               |
| Fe( 139) 0.561 2.539  | C1                     | -8.209619772 | -4.565720423  | -0.086304380  |
| Fe( 140) 0.286 -0.938 | C2                     | -8.274163961 | -5.915028353  | -0.810563873  |
| Fe( 141) 0.580 2.929  | C3                     | -9.307496291 | -2.389309811  | 0.256482915   |
| Fe( 142) 0.530 -2.225 | C4                     | -9.295375104 | -2.327135941  | 1.781927472   |
| Fe( 143) 0.568 2.917  | C5                     | -9.914918459 | -3.388045421  | 3.892315377   |
| Fe( 144) 0.497 -2.038 | C6                     | -8.527141821 | -3.623533866  | 4.499118976   |
| Fe( 145) 0.336 0.289  | C7                     | -6.301378926 | -4.597202109  | 4.170648840   |
| <b>S=2</b>            | C8                     | -5.430155000 | -3.349284307  | 3.991691657   |
|                       | C9                     | -4.856409068 | -1.423321451  | 2.610842657   |
|                       | C10                    | -5.195980177 | -0.316812968  | 3.620383307   |
|                       | C11                    | -6.901299447 | 0.824812204   | 4.919099812   |
|                       | C12                    | -6.521238811 | 0.504033413   | 6.370404776   |
|                       | C13                    | -6.623597719 | -1.132333060  | 8.190105722   |
|                       | C14                    | -5.239584141 | -1.612872386  | 8.640649057   |
|                       | C15                    | -3.191285752 | -2.830209014  | 8.028599459   |
|                       | C16                    | -1.947400019 | -2.126884757  | 7.477904890   |
|                       | C17                    | -1.112995534 | -0.383106337  | 5.920769076   |
|                       | C18                    | -1.103059980 | 1.093028361   | 6.356216440   |
|                       | C19                    | -1.176318433 | -0.581592975  | 4.382178712   |
|                       | C20                    | -0.181033708 | 0.317937375   | 3.640847672   |
|                       | C21                    | -0.956791613 | -2.056704782  | 4.024621492   |
|                       | C22                    | -2.327117198 | 3.227730447   | 6.472447761   |
|                       | C23                    | -2.656061261 | 3.370962231   | 7.971733871   |
|                       | C24                    | -3.330990920 | 3.987964862   | 5.571542056   |
|                       | C25                    | -3.540424275 | 5.424695007   | 6.065971716   |
|                       | C26                    | -2.862458791 | 3.988192669   | 4.111253414   |
|                       | C27                    | -4.115210458 | 2.800270795   | 9.823996875   |



|     |              |              |              |
|-----|--------------|--------------|--------------|
| C28 | -2.984918213 | 2.580360309  | 10.808949907 |
| C29 | 3.133746037  | -9.980778262 | 8.379807539  |
| C30 | 4.003246731  | -9.007168513 | 7.584174183  |
| C31 | 4.560071182  | -6.578802214 | 7.361973268  |
| C32 | 5.523184163  | -6.016014384 | 8.423559725  |
| C33 | 3.555601448  | -5.511341274 | 6.890121760  |
| C34 | 4.220621787  | -4.279728963 | 6.269337631  |
| C35 | 3.194465905  | -3.396536776 | 5.561646168  |
| C36 | 3.396177220  | -0.995707587 | 4.891944918  |
| C37 | 7.820133692  | -5.312460925 | 8.891900314  |
| C38 | 8.246214493  | -3.890836560 | 8.591445591  |
| C39 | -4.852324838 | -2.607700743 | -2.333143071 |
| C40 | -5.158875923 | -1.102190342 | -2.414317488 |
| C41 | -3.398238836 | -2.762015446 | -1.837565941 |
| C42 | -2.994473213 | -4.165770699 | -1.336818864 |
| C43 | -2.441029348 | -5.112362545 | -2.399446130 |
| C44 | -5.194718718 | 0.831749373  | -3.959083683 |
| C45 | -6.539396958 | 1.477947240  | -3.610541653 |
| C46 | -4.770803574 | 1.048281996  | -5.440245131 |
| C47 | -8.883457102 | 1.083302344  | -3.000867855 |
| C48 | -8.874931083 | 1.494698965  | -1.520906255 |
| C49 | -7.646588030 | 1.481975689  | 0.608074555  |
| C50 | -6.552192498 | 2.510940225  | 0.909867354  |
| C51 | -4.596462362 | 3.786639965  | 0.152085399  |
| C52 | -5.192628575 | 5.197228911  | 0.315185636  |
| C53 | -3.640105656 | 3.883631845  | -1.046956774 |
| C54 | -2.814973347 | 2.680256525  | -1.378783019 |
| C55 | -2.399824258 | 1.612925291  | -0.609913319 |
| C56 | -1.558943688 | 1.440478624  | -2.647517840 |
| C57 | -6.711361619 | 6.818846986  | -0.730425823 |
| C58 | -7.168791959 | 7.389831034  | 0.610212456  |
| C59 | -7.897135194 | 6.749713551  | -1.721629542 |
| C60 | -8.282811865 | 8.032244882  | -2.397305578 |
| C61 | -8.390769389 | 9.319998031  | -1.908727757 |
| C62 | -8.915770921 | 9.264698385  | -4.061500500 |
| C63 | 7.465800466  | 2.053875011  | 5.958943443  |
| C64 | 8.259689829  | 0.843609209  | 6.412908959  |
| C65 | 6.143943110  | 1.525728244  | 5.344841545  |
| C66 | 5.225576391  | 2.637430190  | 4.896624986  |
| C67 | 4.304254390  | 3.223037726  | 5.783239313  |
| C68 | 5.270821450  | 3.124904155  | 3.577467146  |
| C69 | 3.458150723  | 4.259364992  | 5.373787798  |
| C70 | 4.440962882  | 4.164787683  | 3.157221020  |
| C71 | 3.533175551  | 4.729536305  | 4.056834186  |
| C72 | 6.415566272  | 6.317903605  | -1.194478895 |
| C73 | 5.617235076  | 7.277478921  | -2.085809070 |
| C74 | 5.500025286  | 5.203934071  | -0.663981770 |
| C75 | 5.281341946  | 8.142111346  | -4.365011577 |
| C76 | 3.879652954  | 7.684571419  | -4.775365999 |
| C77 | 2.221933839  | 5.846941402  | -4.700407530 |
| C78 | 1.242537577  | 6.102345970  | -3.532396196 |
| C79 | 2.395246679  | 4.356332810  | -5.045293712 |
| C80 | 1.138240992  | 3.549580779  | -5.382795033 |
| C81 | 0.436117752  | 3.883958983  | -6.710256817 |
| C82 | -0.792484263 | 5.994082161  | -7.216412595 |
| C83 | 0.867028544  | 6.209597238  | -1.125165649 |
| C84 | 0.739716472  | 7.700322025  | -0.754963047 |
| C85 | 1.313711420  | 5.442367913  | 0.128915201  |
| C86 | 1.934261134  | 9.818770975  | -0.508723104 |
| C87 | 1.520669529  | 11.052640046 | -1.304689291 |
| C88 | 0.582788241  | 11.965485189 | -3.385975002 |

|       |              |               |              |
|-------|--------------|---------------|--------------|
| C89   | -0.814012795 | 12.573263994  | -3.141293269 |
| C90   | 0.768916165  | 11.593875464  | -4.873597718 |
| C91   | -0.189353868 | 10.490180475  | -5.307366380 |
| C92   | -3.050177736 | 12.238326370  | -2.190655692 |
| C93   | -3.135636530 | 13.522359170  | -1.376295164 |
| C94   | -3.838009583 | 11.108990541  | -1.473820083 |
| C95   | -3.891172121 | 9.838608516   | -2.289840352 |
| C96   | -4.871961151 | 9.664532320   | -3.276808060 |
| C97   | -2.934087857 | 8.825692689   | -2.119524414 |
| C98   | -4.891186888 | 8.525227716   | -4.083879279 |
| C99   | -2.923514319 | 7.690063958   | -2.932991573 |
| C100  | -3.904725440 | 7.553224329   | -3.912879760 |
| C101  | 6.043834957  | -6.179981520  | -6.324732160 |
| C102  | 4.574821850  | -5.789143063  | -6.290099763 |
| C103  | 2.979964859  | -3.955632779  | -5.766096433 |
| C104  | 2.729583302  | -2.809681445  | -6.753244923 |
| C105  | 3.213688120  | -0.456588262  | -7.244875110 |
| C106  | 4.415215089  | 0.482513464   | -7.289456314 |
| C107  | 6.559083675  | 1.199672136   | -6.353595467 |
| C108  | 7.768754607  | 0.760196150   | -7.152902941 |
| C109  | -0.380868201 | -5.732053324  | -8.394147967 |
| C110  | -1.352752935 | -4.579954288  | -8.676623296 |
| C111  | -0.348070996 | -6.017064014  | -6.873949942 |
| C112  | 0.273722775  | -7.393846194  | -6.572708898 |
| C113  | 0.583727030  | -7.526710168  | -5.099226521 |
| C114  | -1.723988988 | -2.160775255  | -8.686057087 |
| C115  | -0.998061866 | -1.063081999  | -9.438973855 |
| C116  | -2.430187445 | -1.694404493  | -7.389104727 |
| C117  | -1.463813398 | -1.540619549  | -6.245197164 |
| C118  | -0.684007262 | -0.379363170  | -6.113055345 |
| C119  | -1.256534758 | -2.599697222  | -5.344951651 |
| C120  | 0.308814754  | -0.305244393  | -5.133409059 |
| C121  | -0.260911302 | -2.523454863  | -4.364798816 |
| C122  | 0.539961414  | -1.382581099  | -4.272971191 |
| C123  | 8.201989604  | -7.356525064  | -0.361129113 |
| C124  | 9.031968698  | -7.280939773  | 0.930964233  |
| C125  | 6.717353899  | -7.651522348  | -0.093936005 |
| C126  | 5.803164705  | -7.573825626  | -1.281113539 |
| C127  | 5.774347190  | -8.417344231  | -2.374168870 |
| C128  | 4.072642013  | -7.003820662  | -2.488473821 |
| C129  | 9.592334729  | -8.183086903  | 3.119998817  |
| C130  | 11.079843729 | -8.174967384  | 2.849923209  |
| C131  | -0.118340772 | -6.631458885  | 1.856045281  |
| C132  | 1.248435831  | -6.372414638  | 2.424086117  |
| C133  | 2.404935891  | -6.958806734  | 1.511256197  |
| C134  | 2.210507079  | -8.497043607  | 1.356703743  |
| C135  | 3.403015003  | -9.183919916  | 0.668167675  |
| C136  | 3.374205818  | -10.682363852 | 0.771930007  |
| C137  | 3.733925618  | -6.754637837  | 2.304189031  |
| C138  | 4.102017217  | -1.378876564  | -0.844737914 |
| Fe139 | 4.661056493  | -2.930673571  | -1.923622493 |
| Fe140 | 2.475611864  | 0.044867927   | -0.738633777 |
| Fe141 | 5.044450774  | 0.102168038   | 0.154521569  |
| Fe142 | 4.608012599  | -0.372431741  | -2.398128147 |
| Fe143 | 4.235482019  | 2.087384030   | -1.465015946 |
| Fe144 | 4.961551442  | -2.445670517  | 0.607058815  |
| Fe145 | 2.605983678  | -2.413864165  | -0.241928208 |
| H146  | -6.664204981 | -6.755918349  | 0.115472121  |
| H147  | -6.333692181 | -6.203501727  | -1.383695886 |
| H148  | -9.954496568 | -3.989196089  | -1.003683964 |
| H149  | -8.624602734 | -5.753341478  | -1.841987614 |

|      |               |              |               |
|------|---------------|--------------|---------------|
| H150 | -9.063711674  | -6.503178155 | -0.310726249  |
| H151 | -8.449982069  | -1.794285247 | -0.088992401  |
| H152 | -10.360882696 | -4.080933152 | 1.902753733   |
| H153 | -10.226039782 | -1.903136286 | -0.099629805  |
| H154 | -10.584588617 | -4.195919521 | 4.215701562   |
| H155 | -7.945925592  | -4.642462688 | 2.815378511   |
| H156 | -10.285322286 | -2.442684187 | 4.310962029   |
| H157 | -3.775902870  | -1.601480900 | 2.687851329   |
| H158 | -6.208419599  | -3.024203606 | 2.104040435   |
| H159 | -5.885024999  | -5.423032663 | 3.577840659   |
| H160 | -6.433720634  | 1.783000733  | 4.660827806   |
| H161 | -7.215301667  | -0.765541610 | 3.503341960   |
| H162 | -6.255187336  | -4.872037520 | 5.231118475   |
| H163 | -5.073363767  | -1.073488816 | 1.591243831   |
| H164 | -7.230428921  | -1.431509431 | 6.165989898   |
| H165 | -7.992234834  | 0.942778446  | 4.860291370   |
| H166 | -1.708345474  | -2.704343299 | 4.499182182   |
| H167 | -1.022473895  | -2.201153882 | 2.935166010   |
| H168 | 0.042837742   | -2.394517624 | 4.341291820   |
| H169 | -2.192144424  | -0.295983401 | 4.064569887   |
| H170 | -7.336205074  | -1.941600922 | 8.408183154   |
| H171 | -2.741181640  | 2.971486848  | 3.712696970   |
| H172 | -4.300276742  | 2.099268985  | 7.819129268   |
| H173 | -3.953202364  | 5.460611581  | 7.084577303   |
| H174 | -0.331688450  | 0.231847133  | 2.554467585   |
| H175 | 0.859766256   | 0.026980041  | 3.841307978   |
| H176 | 7.210375551   | 2.644535053  | 6.859191586   |
| H177 | -3.595486142  | 4.513074529  | 3.481754831   |
| H178 | -4.240833076  | 5.948564364  | 5.399188989   |
| H179 | -1.896674828  | 4.511312689  | 4.018608401   |
| H180 | -2.588894837  | 5.980063804  | 6.065169375   |
| H181 | -4.301163799  | 3.460885589  | 5.629228664   |
| H182 | -1.331509144  | 3.682740671  | 6.359612882   |
| H183 | -2.970542725  | 1.412639186  | 5.513740359   |
| H184 | -0.301492656  | 1.380034117  | 3.903398677   |
| H185 | 1.553702557   | 4.400742762  | -0.151005202  |
| H186 | 0.461828516   | 5.435256137  | 0.826966487   |
| H187 | 2.446154948   | 5.894188476  | 1.674364089   |
| H188 | 2.084841587   | 6.003594342  | 4.274832226   |
| H189 | 4.465567196   | 4.507787505  | 2.122906359   |
| H190 | 5.942867722   | 2.661483972  | 2.851549920   |
| H191 | 4.234911823   | 2.861464041  | 6.812536710   |
| H192 | -3.142376658  | -0.932604500 | 6.336105297   |
| H193 | -3.160211639  | -3.867056656 | 7.661496547   |
| H194 | -3.093868728  | -2.858195647 | 9.121643838   |
| H195 | -4.856356104  | -2.427008725 | 6.768901829   |
| H196 | -6.876978601  | -0.272242696 | 8.823273535   |
| H197 | 2.733998101   | 4.690412770  | 6.070225553   |
| H198 | -0.171988499  | -0.802147728 | 6.300614448   |
| H199 | -4.561662522  | 3.791356548  | 10.010615982  |
| H200 | -4.881644111  | 2.037811348  | 10.034510260  |
| H201 | -2.169099705  | 1.909939371  | 10.452832417  |
| H202 | 8.705614762   | -5.966755568 | 8.889557566   |
| H203 | -1.020474098  | -6.564009571 | -2.679494129  |
| H204 | -0.217636298  | -8.183899504 | 2.996581710   |
| H205 | -0.440056461  | -8.183319873 | -6.847992485  |
| H206 | 1.190135842   | -7.533278762 | -7.164054577  |
| H207 | -1.365868427  | -5.987736501 | -6.455421627  |
| H208 | -0.163566616  | -1.420922170 | -10.087184534 |
| H209 | -0.853796407  | -6.598030383 | -8.883017800  |
| H210 | -2.718498989  | -2.438023448 | -2.641402507  |

|      |              |              |              |
|------|--------------|--------------|--------------|
| H211 | -3.866084061 | -4.665488231 | -0.877812283 |
| H212 | 0.098884092  | -3.178584144 | -8.191851001 |
| H213 | -2.517991395 | -2.487828894 | -9.387265033 |
| H214 | 1.471302605  | -4.812833343 | -8.545209695 |
| H215 | -1.030716894 | -5.857955074 | -1.066226597 |
| H216 | 0.219336533  | -5.214709884 | -6.378085619 |
| H217 | 1.458756096  | -6.387121069 | -9.019789746 |
| H218 | -5.992874773 | -3.656821157 | -3.698205852 |
| H219 | -3.261138294 | -2.057367171 | -1.004347043 |
| H220 | 2.441967656  | -7.025327613 | -5.512821101 |
| H221 | -2.253708151 | -4.055980233 | -0.531950009 |
| H222 | -4.051791193 | 3.566379403  | 1.081168845  |
| H223 | -2.589447274 | 1.339998680  | 0.423422249  |
| H224 | -8.591882641 | 1.927576538  | 0.943730149  |
| H225 | -7.067365827 | 0.515927185  | -1.203926937 |
| H226 | -6.586051996 | 4.712901768  | -1.113424784 |
| H227 | -8.202959594 | 9.751173641  | -0.931412862 |
| H228 | -7.628761768 | 6.628924929  | 1.286172206  |
| H229 | -8.765227431 | 6.294286648  | -1.212525857 |
| H230 | -5.914390220 | 7.464509797  | -1.133886465 |
| H231 | -9.223975725 | 9.623110474  | -5.040083156 |
| H232 | -2.969324352 | 4.735750504  | -0.846013152 |
| H233 | -4.225236203 | 4.156551552  | -1.939770675 |
| H234 | -8.951565471 | 11.092687976 | -2.968678889 |
| H235 | -7.613465013 | 6.052308865  | -2.525440218 |
| H236 | -5.627609480 | 2.234328048  | -0.921546871 |
| H237 | -7.463261071 | 0.602019523  | 1.240776222  |
| H238 | -9.257017671 | 1.951544155  | -3.560726471 |
| H239 | -0.994567483 | 1.032319026  | -3.479867082 |
| H240 | -9.614883197 | 0.271748105  | -3.124245339 |
| H241 | 8.980950491  | 3.328259080  | 5.427486911  |
| H242 | 7.650533572  | 3.464068313  | 4.484628239  |
| H243 | 2.657207886  | 5.504681079  | -2.117273132 |
| H244 | -0.148116457 | 5.875995936  | -1.384718226 |
| H245 | 2.622616113  | 8.074684877  | -1.478838420 |
| H246 | -2.560564811 | 3.508789117  | -4.016730942 |
| H247 | -4.051963591 | 2.908055877  | -5.445206179 |
| H248 | -3.248356069 | 4.835069619  | -4.573053640 |
| H249 | -3.768317274 | 0.590756225  | -5.547565590 |
| H250 | -5.464660713 | 0.488155778  | -6.088467299 |
| H251 | 1.819839546  | 11.309406335 | -5.031439144 |
| H252 | 0.553335039  | 12.490373598 | -5.469722608 |
| H253 | 1.342885650  | 9.038616736  | -5.285581990 |
| H254 | -0.293651596 | 8.460096962  | -5.524438711 |
| H255 | -0.124301373 | 7.207283845  | -8.720069286 |
| H256 | 0.007582591  | 2.969917981  | -7.148936260 |
| H257 | -5.672867212 | 8.394427034  | -4.836434209 |
| H258 | -2.179107867 | 8.901224549  | -1.332260837 |
| H259 | -2.349333319 | 6.673464315  | -6.050087352 |
| H260 | 2.890101069  | 3.854172866  | -4.198726918 |
| H261 | 4.181543860  | 5.867442091  | -3.859471797 |
| H262 | 0.411655136  | 3.585841778  | -4.556184443 |
| H263 | -7.456152161 | -0.353620142 | -3.696140927 |
| H264 | 5.892797414  | 8.208098120  | -5.274755285 |
| H265 | -4.971436907 | -1.310392466 | -4.390367377 |
| H266 | 3.096311798  | 4.302586134  | -5.895496983 |
| H267 | -2.137440132 | 6.940725328  | -2.829571289 |
| H268 | 5.169735847  | 9.156690414  | -3.957899803 |
| H269 | 0.485341072  | 5.597818686  | -8.775595070 |
| H270 | -2.069245858 | 7.559869210  | -7.504722726 |
| H271 | -4.363415130 | -4.013384391 | -3.751948614 |

|      |              |               |              |
|------|--------------|---------------|--------------|
| H272 | -5.521647130 | -2.996850324  | -1.541609053 |
| H273 | -5.641056380 | 10.427066834  | -3.419597875 |
| H274 | -4.461853098 | 1.349538166   | -3.321543716 |
| H275 | 1.795583286  | 6.389674679   | -5.554065421 |
| H276 | 1.171707745  | 4.266924577   | -7.429044870 |
| H277 | 1.466575853  | 2.503066186   | -5.443358210 |
| H278 | -1.401962405 | 4.593319882   | -5.867840713 |
| H279 | 1.353049976  | 9.843742161   | 0.425044975  |
| H280 | 0.870958040  | 9.888428004   | -2.864964436 |
| H281 | 1.286673443  | 12.776881199  | -3.148171924 |
| H282 | 2.993735747  | 9.952902371   | -0.249519853 |
| H283 | -1.351730456 | 10.933995908  | -2.048722670 |
| H284 | 6.659240827  | -5.298769977  | -6.557890131 |
| H285 | 6.298025897  | -6.481529605  | -5.286999601 |
| H286 | 8.287210517  | -6.360545134  | -0.819612743 |
| H287 | 7.191218725  | -7.640541191  | -7.163738209 |
| H288 | 5.585073314  | -7.966464424  | -7.183190894 |
| H289 | 6.115330967  | 4.488549172   | -0.102906614 |
| H290 | 6.294091933  | 7.552656731   | 0.425106173  |
| H291 | 6.687018377  | 6.661663434   | -3.731158441 |
| H292 | 4.743850829  | 5.645299862   | 0.000666448  |
| H293 | 7.693955160  | 7.715493633   | -0.402690987 |
| H294 | 6.847722445  | 1.350063908   | -5.301307415 |
| H295 | 7.225221112  | 5.859519641   | -1.784028127 |
| H296 | 2.923550229  | -5.215647255  | 7.744608107  |
| H297 | 5.127638248  | -6.946267399  | 6.498378283  |
| H298 | 5.398876321  | -0.458190477  | -5.706252022 |
| H299 | 3.609589747  | 0.820581689   | 3.985743968  |
| H300 | 3.006271799  | -0.771585563  | -8.275835786 |
| H301 | -0.101949448 | -3.354590560  | -3.672513615 |
| H302 | 2.354137457  | 0.158321201   | -6.928919031 |
| H303 | 2.447611803  | -3.013483200  | 6.268403468  |
| H304 | 3.768776991  | -1.602784727  | -5.482712088 |
| H305 | 2.649374186  | -3.992929517  | 4.810257180  |
| H306 | 2.902565701  | -5.995457941  | 6.145472169  |
| H307 | 4.975219224  | -4.590104540  | 5.530951036  |
| H308 | 4.739353043  | -3.685875343  | 7.039215526  |
| H309 | -3.197500582 | -2.441767928  | -7.142217256 |
| H310 | 3.220350796  | -7.566979824  | 8.728234703  |
| H311 | 2.345874036  | -10.318755184 | 7.689765008  |
| H312 | 1.332405117  | -1.311158386  | -3.527864358 |
| H313 | 3.113918435  | -9.489323238  | 10.380400875 |
| H314 | 1.634264491  | -9.858853626  | 9.783439707  |
| H315 | 4.354081428  | -2.530694508  | 4.022394510  |
| H316 | 0.918328906  | 0.591321348   | -5.018673572 |
| H317 | -1.882364568 | -3.493565582  | -5.406021489 |
| H318 | 6.560335628  | -10.101878409 | 3.492329301  |
| H319 | 6.630440488  | -8.668260229  | 0.330345488  |
| H320 | 5.350707294  | -8.042229394  | 3.967387362  |
| H321 | 6.036441412  | -11.055693029 | 2.399061451  |
| H322 | 7.588151923  | -0.086890970  | -7.858425004 |
| H323 | 5.720414537  | -5.095198652  | 2.841733669  |
| H324 | 1.348023533  | -6.781702242  | 3.440540245  |
| H325 | 5.086497254  | -3.924733104  | -5.611110660 |
| H326 | 2.075254904  | -8.930526525  | 2.360626698  |
| H327 | 4.348461094  | -8.487569320  | -3.973330532 |
| H328 | 3.168310684  | -6.529144023  | -2.848652382 |
| H329 | 3.765057507  | -10.861070125 | 8.591109726  |
| H330 | 4.247546236  | -0.511617189  | 3.069246616  |
| H331 | 7.208884668  | -5.628583642  | 4.648832869  |
| H332 | 6.629933808  | -3.837399582  | 2.883272107  |

|       |              |               |              |
|-------|--------------|---------------|--------------|
| H333  | 7.050492849  | -6.013046523  | 7.005418633  |
| H334  | 2.736974865  | -1.017005573  | 6.840464528  |
| H335  | 2.340328426  | -12.201817227 | 0.325259902  |
| H336  | 3.414878684  | -8.900100879  | -0.394282981 |
| H337  | 4.349242457  | -8.861282622  | 1.116340878  |
| H338  | 1.297030602  | -8.679327320  | 0.771883961  |
| H339  | 2.866747562  | -3.610556887  | -4.726964465 |
| H340  | -0.853101750 | 0.458917465   | -6.792908110 |
| H341  | -2.936947625 | -0.745131213  | -7.618870856 |
| H342  | 1.407168187  | -5.286139662  | 2.451438589  |
| H343  | 7.108290290  | -7.147338162  | 4.979962776  |
| H344  | 5.651395341  | -8.858244406  | 5.256745662  |
| H345  | 2.364396627  | 0.422513744   | 5.970996240  |
| H346  | 6.421045362  | -9.239019316  | -2.662105318 |
| H347  | 6.348669446  | -6.958591023  | 0.672060931  |
| H348  | 2.251019126  | -4.742819899  | -5.969374148 |
| H349  | 6.233955640  | 2.172271630   | -6.758076453 |
| H350  | 5.647271630  | 0.909845107   | 6.110136127  |
| H351  | 6.388791764  | 0.873192538   | 4.491020159  |
| H352  | 9.751482327  | -8.047753948  | -1.515433569 |
| H353  | 8.861690689  | -9.246584999  | -0.846968974 |
| H354  | 9.367325217  | -9.099894510  | 3.687623302  |
| H355  | 8.050944967  | -8.897349363  | 1.833543796  |
| H356  | 11.388503218 | -8.640532057  | 1.883653778  |
| H357  | 9.325001032  | -7.324120054  | 3.756992975  |
| H358  | 8.832018670  | 0.339006206   | 5.597855079  |
| H359  | -2.252870042 | 13.723196564  | -0.723759918 |
| H360  | 7.396555311  | -5.312283009  | 9.912021871  |
| H361  | 7.488214567  | -3.266566075  | 8.059703158  |
| H362  | -3.514741236 | 12.432172679  | -3.171311747 |
| H363  | -3.377019255 | 10.918256016  | -0.491758905 |
| H364  | -4.852212113 | 11.492045528  | -1.290328953 |
| H365  | -4.665795483 | 6.393571528   | -5.281346730 |
| H366  | 2.466658715  | -1.082568063  | 0.656324133  |
| H367  | 0.173003854  | -1.087103369  | 0.455181721  |
| H368  | -1.054858741 | 0.011157758   | -1.189131779 |
| H369  | 1.330707089  | 1.026422084   | -0.565218830 |
| Mo370 | 3.882951498  | -4.831597398  | -0.075468174 |
| N371  | -7.045136063 | -6.689034708  | -0.831883159 |
| N372  | -9.271821633 | -3.738561883  | -0.292406934 |
| N373  | -9.916086817 | -3.340283968  | 2.438959614  |
| N374  | -7.686199736 | -4.399862554  | 3.770691929  |
| N375  | -5.598453277 | -2.657165465  | 2.837083524  |
| N376  | -6.501126098 | -0.198213651  | 3.966300255  |
| N377  | -6.772177227 | -0.763502290  | 6.791246952  |
| N378  | -4.473574882 | -2.231527592  | 7.699186372  |
| N379  | -2.176577501 | -1.115023648  | 6.601092516  |
| N380  | -2.221804404 | 1.821812642   | 6.076394429  |
| N381  | -3.691624093 | 2.631108810   | 8.445564946  |
| N382  | 2.508602436  | -9.379690069  | 9.563853232  |
| N383  | 3.850101905  | -7.716201769  | 7.932546274  |
| N384  | 3.825032443  | -2.271050609  | 4.859990651  |
| N385  | 2.678033104  | -0.543722560  | 5.945375996  |
| N386  | 3.641225139  | -0.188666991  | 3.855038690  |
| N387  | 6.794311265  | -5.811736737  | 7.996695780  |
| N388  | -5.055696852 | -3.253586058  | -3.634659542 |
| N389  | -1.426639665 | -5.909585128  | -2.006058352 |
| N390  | -5.147088035 | -0.596186314  | -3.669205214 |
| N391  | -7.610870965 | 0.638123112   | -3.535382898 |
| N392  | -7.813065620 | 1.079134904   | -0.775976636 |
| N393  | -5.639468013 | 2.785416196   | -0.065361579 |

|      |              |              |              |
|------|--------------|--------------|--------------|
| N394 | -2.283039435 | 2.557138730  | -2.653468977 |
| N395 | -1.612339290 | 0.841358828  | -1.437701938 |
| N396 | -6.225966494 | 5.463177297  | -0.526603533 |
| N397 | -8.616053406 | 8.012204534  | -3.742999931 |
| N398 | -8.789553680 | 10.089100882 | -2.983051101 |
| N399 | 8.250857322  | 2.784669946  | 4.960733748  |
| N400 | 7.027882282  | 7.019711731  | -0.053697245 |
| N401 | 5.963161303  | 7.295998895  | -3.405241046 |
| N402 | 3.542330838  | 6.419270087  | -4.451070930 |
| N403 | -0.655351658 | 4.851083296  | -6.554053493 |
| N404 | 0.026181373  | 6.326238210  | -8.239628920 |
| N405 | -1.709930442 | 6.905158813  | -6.815181843 |
| N406 | 1.732659018  | 5.960557644  | -2.272675900 |
| N407 | 1.763561120  | 8.519451960  | -1.140610827 |
| N408 | 0.908393763  | 10.844296065 | -2.508511889 |
| N409 | 0.337051508  | 9.239710733  | -5.340410553 |
| N410 | -1.661384857 | 11.846039000 | -2.374306927 |
| N411 | 6.273178537  | -7.222042525 | -7.329425639 |
| N412 | 4.315445967  | -4.516094134 | -5.935219739 |
| N413 | 3.322603881  | -1.645464987 | -6.420411533 |
| N414 | 5.447582517  | 0.268201732  | -6.433185898 |
| N415 | 0.917780594  | -5.520119608 | -9.044752144 |
| N416 | -0.861965037 | -3.318944126 | -8.521340541 |
| N417 | 8.790470838  | -8.330630349 | -1.302348048 |
| N418 | 4.730903286  | -6.686862726 | -1.377918067 |
| N419 | 4.677054715  | -8.042075321 | -3.120815060 |
| N420 | 8.811864703  | -8.221778637 | 1.893465856  |
| O421 | -7.282554961 | -4.261991100 | 0.687290763  |
| O422 | -8.758837074 | -1.379663637 | 2.376714031  |
| O423 | -8.226709898 | -3.146080907 | 5.605712697  |
| O424 | -4.624239504 | -2.992459480 | 4.866455974  |
| O425 | -4.317280020 | 0.430813639  | 4.078727110  |
| O426 | -6.053235406 | 1.380401334  | 7.117637110  |
| O427 | -4.897944749 | -1.467770135 | 9.822748611  |
| O428 | -0.821648825 | -2.513503606 | 7.824518786  |
| O429 | -0.118590361 | 1.577013163  | 6.936967690  |
| O430 | -2.011217864 | 4.133332973  | 8.710691231  |
| O431 | -2.988717770 | 3.041528435  | 11.941667820 |
| O432 | 4.750449575  | -9.444466215 | 6.683158388  |
| O433 | 5.126221160  | -5.781996880 | 9.579027164  |
| O434 | 9.330377524  | -3.433300916 | 8.919251852  |
| O435 | -5.385005813 | -0.414946631 | -1.395548038 |
| O436 | -2.910536604 | -5.159926447 | -3.558301858 |
| O437 | -6.621280845 | 2.689325957  | -3.362179572 |
| O438 | -4.794069205 | 2.391585370  | -5.868470674 |
| O439 | -9.826496684 | 2.149146455  | -1.069543383 |
| O440 | -6.530445544 | 3.066235093  | 2.015592260  |
| O441 | -4.697311335 | 6.049025608  | 1.060873138  |
| O442 | -7.107264487 | 8.568520567  | 0.919484619  |
| O443 | 8.278103366  | 0.421519802  | 7.562026753  |
| O444 | 2.723131184  | 5.743949157  | 3.585253132  |
| O445 | 4.719526948  | 8.012017887  | -1.634503324 |
| O446 | 3.145261224  | 8.477405406  | -5.401193675 |
| O447 | 0.071566866  | 6.442749147  | -3.773045502 |
| O448 | -0.238545236 | 8.099007541  | -0.108036204 |
| O449 | 2.445002691  | 6.093755407  | 0.716197992  |
| O450 | 1.724229269  | 12.182014641 | -0.841346441 |
| O451 | -1.116455898 | 13.675760373 | -3.620591912 |
| O452 | -1.387689955 | 10.723758150 | -5.534164551 |
| O453 | -4.104999239 | 14.264159382 | -1.392260121 |
| O454 | -3.851794413 | 6.422062575  | -4.741791270 |

|  |                        |              |               |              |
|--|------------------------|--------------|---------------|--------------|
|  | O455                   | 3.685595735  | -6.640431794  | -6.546465281 |
|  | O456                   | 2.047231080  | -2.969981973  | -7.788909960 |
|  | O457                   | 4.388840470  | 1.432020053   | -8.091219254 |
|  | O458                   | 8.865039472  | 1.287596301   | -7.055514238 |
|  | O459                   | -2.533231504 | -4.797625131  | -8.998704841 |
|  | O460                   | -0.256379803 | -7.806212659  | -4.250231663 |
|  | O461                   | 1.855717640  | -7.272743787  | -4.731155500 |
|  | O462                   | -1.306761847 | 0.118590298   | -9.401374798 |
|  | O463                   | 9.946215552  | -6.446476089  | 1.067112796  |
|  | O464                   | 11.908339845 | -7.771294306  | 3.653894862  |
|  | O465                   | -0.677459369 | -5.950681659  | 1.008801458  |
|  | O466                   | -0.771721745 | -7.745500258  | 2.322590811  |
|  | O467                   | 4.234063970  | -11.381053978 | 1.304124416  |
|  | O468                   | 2.271000908  | -11.231441878 | 0.198285600  |
|  | O469                   | 4.623010817  | -6.026283311  | 1.715801090  |
|  | O470                   | 3.895594476  | -7.330194426  | 3.407372806  |
|  | O471                   | 2.426859877  | -6.313712264  | 0.293080926  |
|  | O472                   | 7.542182634  | -6.308548859  | 5.291359693  |
|  | O473                   | 6.283882353  | -4.552453185  | 3.451862665  |
|  | O474                   | -2.817789298 | 4.007414388   | -4.872969824 |
|  | O475                   | 6.834624906  | -10.874752370 | 2.936479000  |
|  | O476                   | 6.090733035  | -8.537042504  | 4.427621246  |
|  | S477                   | 4.599755095  | 4.301175913   | -2.007361819 |
|  | S478                   | 2.820254002  | 0.974738247   | -2.795261953 |
|  | S479                   | 2.667148194  | -3.983019325  | -1.927052196 |
|  | S480                   | 3.385944164  | 1.596833548   | 0.627625244  |
|  | S481                   | 0.629130884  | -1.449811271  | -0.775550497 |
|  | S482                   | 5.305002379  | -1.964171365  | -3.826247298 |
|  | S483                   | 3.171971221  | -3.346880585  | 1.645739016  |
|  | S484                   | 6.212099271  | 0.964227772   | -1.608749663 |
|  | S485                   | 6.096469182  | -3.992777279  | -0.518515390 |
|  | S486                   | 6.058436238  | -0.972285309  | 1.837824052  |
|  | <b>13(b)</b>           |              |               |              |
|  | Fe( 139)               | 0.553        | -2.379        |              |
|  | Fe( 140)               | 0.280        | -0.526        |              |
|  | Fe( 141)               | 0.548        | -2.615        |              |
|  | Fe( 142)               | 0.547        | 2.453         |              |
|  | Fe( 143)               | 0.591        | 3.109         |              |
|  | Fe( 144)               | 0.505        | 2.251         |              |
|  | Fe( 145)               | 0.357        | -0.768        |              |
|  | <b>S=1</b>             |              |               |              |
|  | bm12cnx2b262hx35.car_3 |              |               |              |
|  | C1                     | -8.213950538 | -4.569876988  | -0.088298307 |
|  | C2                     | -8.277936605 | -5.919135850  | -0.812435086 |
|  | C3                     | -9.308912750 | -2.392344024  | 0.257834291  |
|  | C4                     | -9.296516194 | -2.329148989  | 1.783756736  |
|  | C5                     | -9.913591633 | -3.388025942  | 3.894963010  |
|  | C6                     | -8.525171313 | -3.622377119  | 4.499474053  |
|  | C7                     | -6.299916719 | -4.596182787  | 4.171570995  |
|  | C8                     | -5.428963309 | -3.348356202  | 3.991748805  |
|  | C9                     | -4.856716551 | -1.424419065  | 2.607788953  |
|  | C10                    | -5.194785374 | -0.315238801  | 3.615689705  |
|  | C11                    | -6.899625383 | 0.826291521   | 4.917295304  |
|  | C12                    | -6.519577868 | 0.506857360   | 6.368924893  |
|  | C13                    | -6.624986515 | -1.128322491  | 8.190393385  |
|  | C14                    | -5.242822716 | -1.614869157  | 8.641945402  |
|  | C15                    | -3.196077100 | -2.835793086  | 8.031191040  |
|  | C16                    | -1.952258411 | -2.128709725  | 7.486079025  |
|  | C17                    | -1.119651470 | -0.380389401  | 5.931946227  |
|  | C18                    | -1.110217912 | 1.095687784   | 6.370319602  |
|  | C19                    | -1.181350092 | -0.578944282  | 4.392433693  |
|  | C20                    | -0.181315158 | 0.317406384   | 3.653957436  |
|  | C21                    | -0.962131929 | -2.054667660  | 4.037388489  |
|  | C22                    | -2.332397424 | 3.232071753   | 6.483897412  |
|  | C23                    | -2.661922045 | 3.379072078   | 7.981140933  |
|  | C24                    | -3.333010309 | 3.992602530   | 5.579855929  |
|  | C25                    | -3.538105895 | 5.431273589   | 6.069632065  |
|  | C26                    | -2.863310918 | 3.988389002   | 4.119293035  |
|  | C27                    | -4.118750652 | 2.813844015   | 9.836361289  |



|     |              |              |              |
|-----|--------------|--------------|--------------|
| C28 | -2.986241505 | 2.587279808  | 10.818728868 |
| C29 | 3.134534686  | -9.980718662 | 8.374505178  |
| C30 | 4.002602296  | -9.003763660 | 7.580396035  |
| C31 | 4.556401961  | -6.575729244 | 7.362142829  |
| C32 | 5.520885215  | -6.015709602 | 8.424518996  |
| C33 | 3.550714620  | -5.510391309 | 6.890940508  |
| C34 | 4.214146704  | -4.280657453 | 6.266948497  |
| C35 | 3.190920608  | -3.399162131 | 5.553041196  |
| C36 | 3.420824377  | -1.004935058 | 4.870103887  |
| C37 | 7.817970294  | -5.311447870 | 8.891438903  |
| C38 | 8.243363364  | -3.889815501 | 8.592956083  |
| C39 | -4.857955297 | -2.608923215 | -2.330485332 |
| C40 | -5.171187432 | -1.103922672 | -2.412752996 |
| C41 | -3.398817390 | -2.755341257 | -1.841891261 |
| C42 | -2.995142442 | -4.156915285 | -1.341819756 |
| C43 | -2.444487875 | -5.103799640 | -2.406021750 |
| C44 | -5.211375408 | 0.826775411  | -3.964699475 |
| C45 | -6.563792364 | 1.472355113  | -3.636251615 |
| C46 | -4.764998220 | 1.044238097  | -5.436203901 |
| C47 | -8.899942579 | 1.064951225  | -2.995980173 |
| C48 | -8.886308089 | 1.478872947  | -1.517724494 |
| C49 | -7.647765092 | 1.485464623  | 0.606542612  |
| C50 | -6.558787468 | 2.522430258  | 0.902160767  |
| C51 | -4.600918505 | 3.791842935  | 0.144362579  |
| C52 | -5.196589773 | 5.203358245  | 0.310043303  |
| C53 | -3.643862583 | 3.887029391  | -1.054227984 |
| C54 | -2.816645413 | 2.683715006  | -1.384287086 |
| C55 | -2.388727375 | 1.624133790  | -0.611774308 |
| C56 | -1.547874373 | 1.452762767  | -2.650285254 |
| C57 | -6.726586108 | 6.825434263  | -0.725498064 |
| C58 | -7.189306809 | 7.392152000  | 0.614281309  |
| C59 | -7.910038198 | 6.752473222  | -1.718652847 |
| C60 | -8.294627843 | 8.033743764  | -2.398390564 |
| C61 | -8.398406340 | 9.324036108  | -1.914854065 |
| C62 | -8.918580247 | 9.262112362  | -4.068538226 |
| C63 | 7.463563692  | 2.062806339  | 5.966603085  |
| C64 | 8.254546165  | 0.850966150  | 6.422054566  |
| C65 | 6.142187351  | 1.534009824  | 5.351000950  |
| C66 | 5.222633902  | 2.643817643  | 4.898967693  |
| C67 | 4.299890646  | 3.230347866  | 5.783789991  |
| C68 | 5.271020419  | 3.131596438  | 3.579881237  |
| C69 | 3.455015486  | 4.266517391  | 5.372470417  |
| C70 | 4.444312949  | 4.173880678  | 3.158914116  |
| C71 | 3.534601165  | 4.738720011  | 4.056627255  |
| C72 | 6.433649529  | 6.359071807  | -1.204319645 |
| C73 | 5.629698435  | 7.313285838  | -2.097730569 |
| C74 | 5.531290596  | 5.224980940  | -0.696075714 |
| C75 | 5.280241792  | 8.159867341  | -4.382812584 |
| C76 | 3.880464255  | 7.692272438  | -4.787621481 |
| C77 | 2.231992772  | 5.847836260  | -4.707747253 |
| C78 | 1.256746221  | 6.102095717  | -3.535898445 |
| C79 | 2.402409502  | 4.355917563  | -5.048026562 |
| C80 | 1.142783507  | 3.553447365  | -5.384448179 |
| C81 | 0.438900291  | 3.888152308  | -6.710401899 |
| C82 | -0.794033178 | 5.995663514  | -7.219210015 |
| C83 | 0.885573192  | 6.201775409  | -1.128659170 |
| C84 | 0.749967006  | 7.691386459  | -0.757409250 |
| C85 | 1.333427724  | 5.432801639  | 0.122616202  |
| C86 | 1.931000402  | 9.818130442  | -0.510029844 |
| C87 | 1.515351830  | 11.052359896 | -1.305105200 |
| C88 | 0.578438008  | 11.967584135 | -3.385692815 |

|       |              |               |              |
|-------|--------------|---------------|--------------|
| C89   | -0.816818752 | 12.581279336  | -3.144426674 |
| C90   | 0.767554419  | 11.595701024  | -4.873006960 |
| C91   | -0.191409627 | 10.493853998  | -5.309476436 |
| C92   | -3.054482589 | 12.254980343  | -2.190819614 |
| C93   | -3.138856964 | 13.537995004  | -1.373614218 |
| C94   | -3.841545042 | 11.126141120  | -1.474797629 |
| C95   | -3.893335596 | 9.854279143   | -2.290407854 |
| C96   | -4.873094728 | 9.677180471   | -3.278377778 |
| C97   | -2.934189279 | 8.842838498   | -2.120050150 |
| C98   | -4.890343600 | 8.535849743   | -4.082885078 |
| C99   | -2.922067739 | 7.705326363   | -2.931359302 |
| C100  | -3.903014035 | 7.565309102   | -3.910718084 |
| C101  | 6.045277398  | -6.169567564  | -6.309230755 |
| C102  | 4.575522543  | -5.780421928  | -6.280134492 |
| C103  | 2.970174774  | -3.953022205  | -5.768927198 |
| C104  | 2.723111459  | -2.808037285  | -6.758713787 |
| C105  | 3.209154149  | -0.452012327  | -7.241902643 |
| C106  | 4.413453622  | 0.485798231   | -7.284284390 |
| C107  | 6.560701161  | 1.197667338   | -6.349190850 |
| C108  | 7.768467844  | 0.755614072   | -7.150012960 |
| C109  | -0.379119121 | -5.727136162  | -8.386720863 |
| C110  | -1.350628896 | -4.575809041  | -8.668560910 |
| C111  | -0.348147818 | -6.012374373  | -6.867411215 |
| C112  | 0.274785584  | -7.388616664  | -6.570901186 |
| C113  | 0.585301632  | -7.524923036  | -5.097710898 |
| C114  | -1.726383689 | -2.161133396  | -8.681447573 |
| C115  | -1.003441202 | -1.064750217  | -9.439478943 |
| C116  | -2.434434596 | -1.688690080  | -7.388837498 |
| C117  | -1.463750112 | -1.523387836  | -6.249507751 |
| C118  | -0.693615306 | -0.354391198  | -6.125912159 |
| C119  | -1.234494000 | -2.580338575  | -5.352410639 |
| C120  | 0.313123584  | -0.272795518  | -5.159909224 |
| C121  | -0.225864583 | -2.496253975  | -4.387133476 |
| C122  | 0.566619841  | -1.349127512  | -4.305380276 |
| C123  | 8.203457188  | -7.360686386  | -0.362847485 |
| C124  | 9.033063871  | -7.275829428  | 0.929267137  |
| C125  | 6.722584805  | -7.669155539  | -0.092916688 |
| C126  | 5.809633749  | -7.596763084  | -1.279548113 |
| C127  | 5.785611398  | -8.438849332  | -2.372999882 |
| C128  | 4.079017535  | -7.032002012  | -2.490134712 |
| C129  | 9.589176683  | -8.165658807  | 3.124001374  |
| C130  | 11.076953091 | -8.161188933  | 2.856595708  |
| C131  | -0.120865979 | -6.658863839  | 1.850523160  |
| C132  | 1.248013380  | -6.394244155  | 2.416678689  |
| C133  | 2.409392040  | -6.982977714  | 1.516507420  |
| C134  | 2.215046105  | -8.519837757  | 1.371907555  |
| C135  | 3.407518890  | -9.205992019  | 0.682545381  |
| C136  | 3.381627878  | -10.705642742 | 0.779722888  |
| C137  | 3.734831513  | -6.770816149  | 2.309995666  |
| C138  | 4.093279942  | -1.363764210  | -0.836977007 |
| Fe139 | 4.601283241  | -2.937544112  | -1.918748043 |
| Fe140 | 2.447666538  | -0.063487692  | -0.708850533 |
| Fe141 | 5.162801067  | 0.031456941   | 0.107221449  |
| Fe142 | 4.500396344  | -0.370569854  | -2.414363227 |
| Fe143 | 4.338925384  | 2.092838451   | -1.317426261 |
| Fe144 | 4.940099360  | -2.483101192  | 0.622411771  |
| Fe145 | 2.599748308  | -2.499181539  | -0.313133708 |
| H146  | -6.668760377 | -6.762825165  | 0.113840084  |
| H147  | -6.336411355 | -6.206646126  | -1.383465378 |
| H148  | -9.958784545 | -3.989518412  | -1.002795813 |
| H149  | -8.628958580 | -5.758011916  | -1.843783558 |

|      |               |              |               |
|------|---------------|--------------|---------------|
| H150 | -9.066839926  | -6.508490356 | -0.312601245  |
| H151 | -8.452294703  | -1.795502139 | -0.087426051  |
| H152 | -10.363054267 | -4.082408470 | 1.905769142   |
| H153 | -10.227816203 | -1.905912246 | -0.097107764  |
| H154 | -10.582514423 | -4.195567468 | 4.219665218   |
| H155 | -7.944039495  | -4.641236791 | 2.815199103   |
| H156 | -10.283920350 | -2.442243543 | 4.312527288   |
| H157 | -3.776453252  | -1.603343279 | 2.684924118   |
| H158 | -6.209097557  | -3.025537017 | 2.104788069   |
| H159 | -5.882966001  | -5.422268094 | 3.579300007   |
| H160 | -6.433235017  | 1.785045960  | 4.658933131   |
| H161 | -7.214536144  | -0.764592282 | 3.502027124   |
| H162 | -6.254655234  | -4.870482615 | 5.232360495   |
| H163 | -5.073787206  | -1.076944818 | 1.587508533   |
| H164 | -7.229232755  | -1.428097776 | 6.166168421   |
| H165 | -7.990623651  | 0.943585239  | 4.858459956   |
| H166 | -1.713436463  | -2.702681941 | 4.511952093   |
| H167 | -1.026644223  | -2.201035695 | 2.948245805   |
| H168 | 0.037630418   | -2.391287974 | 4.354788015   |
| H169 | -2.195674868  | -0.292263502 | 4.071841893   |
| H170 | -7.341330998  | -1.934052934 | 8.409641921   |
| H171 | -2.744559138  | 2.970469434  | 3.722525351   |
| H172 | -4.308502750  | 2.110498304  | 7.832501281   |
| H173 | -3.950569099  | 5.472076350  | 7.087958383   |
| H174 | -0.315507878  | 0.220853618  | 2.566504552   |
| H175 | 0.856546358   | 0.029013130  | 3.871648100   |
| H176 | 7.207602521   | 2.654967459  | 6.865929402   |
| H177 | -3.594734449  | 4.514640150  | 3.488272659   |
| H178 | -4.236007603  | 5.956034296  | 5.401116105   |
| H179 | -1.895786124  | 4.508834258  | 4.026174764   |
| H180 | -2.584450302  | 5.982883023  | 6.067455403   |
| H181 | -4.304803064  | 3.468473550  | 5.637178582   |
| H182 | -1.335609161  | 3.684795785  | 6.370119928   |
| H183 | -2.980351990  | 1.414203894  | 5.532229687   |
| H184 | -0.306357205  | 1.381051163  | 3.907014154   |
| H185 | 1.561848678   | 4.389786046  | -0.160992529  |
| H186 | 0.486120272   | 5.432324331  | 0.825148517   |
| H187 | 2.461336664   | 5.899647202  | 1.667888643   |
| H188 | 2.085965894   | 6.012734080  | 4.271765563   |
| H189 | 4.476054628   | 4.523520165  | 2.126929384   |
| H190 | 5.944060325   | 2.667161466  | 2.855189378   |
| H191 | 4.229082524   | 2.868790537  | 6.812753556   |
| H192 | -3.147830841  | -0.930821583 | 6.350574117   |
| H193 | -3.162960952  | -3.869862004 | 7.657560227   |
| H194 | -3.100633842  | -2.869769501 | 9.123998080   |
| H195 | -4.861095492  | -2.433696157 | 6.771666087   |
| H196 | -6.873826515  | -0.266868178 | 8.823535904   |
| H197 | 2.731218468   | 4.698425805  | 6.068115847   |
| H198 | -0.177064444  | -0.797956189 | 6.309716999   |
| H199 | -4.557767859  | 3.807783880  | 10.023617039  |
| H200 | -4.888824787  | 2.055572070  | 10.048952971  |
| H201 | -2.175784081  | 1.910572706  | 10.459970983  |
| H202 | 8.702751658   | -5.966234672 | 8.889522072   |
| H203 | -1.019069164  | -6.552189049 | -2.688199509  |
| H204 | -0.217087805  | -8.207803049 | 2.997493978   |
| H205 | -0.438129941  | -8.178142291 | -6.849569810  |
| H206 | 1.192331347   | -7.524153858 | -7.161962175  |
| H207 | -1.366428208  | -5.986388551 | -6.450733476  |
| H208 | -0.164737694  | -1.422334783 | -10.082881747 |
| H209 | -0.850071855  | -6.593885114 | -8.876531181  |
| H210 | -2.721197990  | -2.429939413 | -2.646696049  |

|      |              |              |              |
|------|--------------|--------------|--------------|
| H211 | -3.866641225 | -4.655242954 | -0.881734967 |
| H212 | 0.099015595  | -3.172071770 | -8.179505264 |
| H213 | -2.517837817 | -2.496718809 | -9.382460740 |
| H214 | 1.470349546  | -4.801328972 | -8.542382532 |
| H215 | -1.025663126 | -5.839966224 | -1.076869828 |
| H216 | 0.216912557  | -5.211291704 | -6.367658350 |
| H217 | 1.463931438  | -6.377381324 | -9.015853284 |
| H218 | -6.003023128 | -3.658273726 | -3.690120931 |
| H219 | -3.261828807 | -2.049756834 | -1.010005778 |
| H220 | 2.443388949  | -7.020527060 | -5.511109937 |
| H221 | -2.251601353 | -4.049659719 | -0.539995140 |
| H222 | -4.054764493 | 3.572184907  | 1.073089363  |
| H223 | -2.578615310 | 1.350611491  | 0.420672096  |
| H224 | -8.594788852 | 1.926543221  | 0.944384891  |
| H225 | -7.068521987 | 0.518243708  | -1.206079119 |
| H226 | -6.605697828 | 4.717618443  | -1.101264445 |
| H227 | -8.212139130 | 9.757728829  | -0.937992366 |
| H228 | -7.645333418 | 6.628198026  | 1.289199425  |
| H229 | -8.778652313 | 6.296833375  | -1.210126300 |
| H230 | -5.932026864 | 7.474827155  | -1.127551594 |
| H231 | -9.222630569 | 9.617132083  | -5.048937666 |
| H232 | -2.972381060 | 4.738571832  | -0.852425809 |
| H233 | -4.226611461 | 4.161338461  | -1.948310639 |
| H234 | -8.947261711 | 11.094395243 | -2.983443475 |
| H235 | -7.623793790 | 6.054244346  | -2.521230629 |
| H236 | -5.616276144 | 2.220155304  | -0.916187680 |
| H237 | -7.457464853 | 0.607467899  | 1.241390047  |
| H238 | -9.282193590 | 1.929472366  | -3.555111710 |
| H239 | -0.981220130 | 1.046078331  | -3.482375016 |
| H240 | -9.625847303 | 0.248221560  | -3.112711827 |
| H241 | 8.981707281  | 3.328873714  | 5.428673906  |
| H242 | 7.649806992  | 3.468051746  | 4.488636309  |
| H243 | 2.673808538  | 5.496666162  | -2.129245339 |
| H244 | -0.128034385 | 5.864511529  | -1.388873896 |
| H245 | 2.628364344  | 8.081034158  | -1.486564505 |
| H246 | -2.568010996 | 3.518594315  | -4.022867703 |
| H247 | -4.052507914 | 2.906711091  | -5.453511908 |
| H248 | -3.259732596 | 4.847545765  | -4.581118257 |
| H249 | -3.758756844 | 0.597184276  | -5.531435884 |
| H250 | -5.443946486 | 0.479713506  | -6.094818297 |
| H251 | 1.818653792  | 11.310325418 | -5.028305601 |
| H252 | 0.554672904  | 12.493083591 | -5.469037867 |
| H253 | 1.338359124  | 9.039339957  | -5.289587202 |
| H254 | -0.298801333 | 8.464956789  | -5.530910638 |
| H255 | -0.128388161 | 7.206705173  | -8.727247827 |
| H256 | 0.009778662  | 2.974259825  | -7.148551387 |
| H257 | -5.671098499 | 8.403099504  | -4.835787541 |
| H258 | -2.177881565 | 8.923219698  | -1.333955829 |
| H259 | -2.347830645 | 6.679856902  | -6.050955820 |
| H260 | 2.892070039  | 3.854798262  | -4.197951886 |
| H261 | 4.196862899  | 5.873893095  | -3.876525184 |
| H262 | 0.418133002  | 3.589238917  | -4.556511475 |
| H263 | -7.467596983 | -0.367043458 | -3.694256080 |
| H264 | 5.889321430  | 8.224352455  | -5.294394174 |
| H265 | -4.990187654 | -1.318915296 | -4.387241581 |
| H266 | 3.104303426  | 4.298204184  | -5.897074578 |
| H267 | -2.134044920 | 6.958447941  | -2.825077764 |
| H268 | 5.163922348  | 9.176030412  | -3.981400546 |
| H269 | 0.478489814  | 5.595115912  | -8.782437804 |
| H270 | -2.071459567 | 7.561225672  | -7.510015577 |
| H271 | -4.372871748 | -4.014867940 | -3.749063109 |

|      |              |               |              |
|------|--------------|---------------|--------------|
| H272 | -5.518098635 | -3.002615191  | -1.534050291 |
| H273 | -5.642212618 | 10.439650830  | -3.424290698 |
| H274 | -4.490548707 | 1.343807390   | -3.312779684 |
| H275 | 1.800416786  | 6.388783958   | -5.560140216 |
| H276 | 1.173249555  | 4.271753815   | -7.430612610 |
| H277 | 1.469742913  | 2.507260108   | -5.444769115 |
| H278 | -1.399082005 | 4.598020007   | -5.869551989 |
| H279 | 1.346438402  | 9.839566244   | 0.421855045  |
| H280 | 0.862988613  | 9.889647698   | -2.866036716 |
| H281 | 1.284579935  | 12.776688940  | -3.145743863 |
| H282 | 2.989402332  | 9.955876819   | -0.247172647 |
| H283 | -1.358506810 | 10.950510478  | -2.042652514 |
| H284 | 6.662952342  | -5.287499261  | -6.532441838 |
| H285 | 6.291918213  | -6.476494895  | -5.271605576 |
| H286 | 8.277643537  | -6.364287357  | -0.822296060 |
| H287 | 7.197423240  | -7.626432887  | -7.149289593 |
| H288 | 5.592025858  | -7.952957232  | -7.173761073 |
| H289 | 6.153845494  | 4.530884839   | -0.116169054 |
| H290 | 6.272811845  | 7.578597573   | 0.421235754  |
| H291 | 6.685396395  | 6.680751064   | -3.745429313 |
| H292 | 4.752077291  | 5.647558142   | -0.046129709 |
| H293 | 7.690600386  | 7.755511111   | -0.375198480 |
| H294 | 6.852491272  | 1.347209333   | -5.298325686 |
| H295 | 7.257567074  | 5.922633059   | -1.790382982 |
| H296 | 2.918639128  | -5.215225010  | 7.745191751  |
| H297 | 5.125337316  | -6.941551787  | 6.498778744  |
| H298 | 5.392430658  | -0.454794870  | -5.699007067 |
| H299 | 3.645083590  | 0.810628207   | 3.957759395  |
| H300 | 2.998495192  | -0.759742663  | -8.274584921 |
| H301 | -0.053579150 | -3.324719438  | -3.696191884 |
| H302 | 2.352816512  | 0.163001027   | -6.917338111 |
| H303 | 2.447198160  | -3.004284725  | 6.256583314  |
| H304 | 3.748187055  | -1.602239701  | -5.477756990 |
| H305 | 2.639257705  | -3.998740926  | 4.808991601  |
| H306 | 2.899368741  | -5.997301757  | 6.147310623  |
| H307 | 4.969263537  | -4.592602438  | 5.529854612  |
| H308 | 4.732111308  | -3.682482138  | 7.033812360  |
| H309 | -3.199895207 | -2.434859598  | -7.134294938 |
| H310 | 3.218285683  | -7.565775513  | 8.727375560  |
| H311 | 2.346605982  | -10.317904027 | 7.683673284  |
| H312 | 1.367786330  | -1.261507979  | -3.570914618 |
| H313 | 3.113743578  | -9.492849189  | 10.376111428 |
| H314 | 1.633400354  | -9.861355699  | 9.777096154  |
| H315 | 4.376532014  | -2.554408183  | 4.018589469  |
| H316 | 0.916014936  | 0.629743367   | -5.048789497 |
| H317 | -1.853260517 | -3.478613068  | -5.405635336 |
| H318 | 6.565127212  | -10.088828737 | 3.480078187  |
| H319 | 6.643319989  | -8.685743019  | 0.332569937  |
| H320 | 5.347420803  | -8.033369825  | 3.973077289  |
| H321 | 6.040809317  | -11.053721424 | 2.396457149  |
| H322 | 7.585547899  | -0.090347964  | -7.855684472 |
| H323 | 5.722651142  | -5.102481371  | 2.846494406  |
| H324 | 1.346275155  | -6.798324855  | 3.434764630  |
| H325 | 5.072813508  | -3.910416789  | -5.594863129 |
| H326 | 2.081013836  | -8.949600051  | 2.377214338  |
| H327 | 4.365235456  | -8.509470869  | -3.977696249 |
| H328 | 3.169383576  | -6.564468568  | -2.847875101 |
| H329 | 3.766765904  | -10.860979595 | 8.583619709  |
| H330 | 4.293063219  | -0.529510115  | 3.053798969  |
| H331 | 7.207481920  | -5.618321500  | 4.653590966  |
| H332 | 6.625260265  | -3.839546248  | 2.880597546  |

|       |              |               |              |
|-------|--------------|---------------|--------------|
| H333  | 7.047513201  | -6.010500814  | 7.003788929  |
| H334  | 2.730101834  | -1.018787756  | 6.807612117  |
| H335  | 2.352222273  | -12.224993701 | 0.322522925  |
| H336  | 3.417613479  | -8.919149889  | -0.379569195 |
| H337  | 4.354600179  | -8.883033915  | 1.129998936  |
| H338  | 1.301550703  | -8.706420438  | 0.787651014  |
| H339  | 2.850538524  | -3.604557504  | -4.732023659 |
| H340  | -0.879238004 | 0.483889032   | -6.802882017 |
| H341  | -2.944415973 | -0.742724842  | -7.626051382 |
| H342  | 1.400706750  | -5.307514972  | 2.440057226  |
| H343  | 7.107853382  | -7.136156026  | 4.975594764  |
| H344  | 5.658825783  | -8.851458869  | 5.256849117  |
| H345  | 2.410897711  | 0.432551749   | 5.941064343  |
| H346  | 6.437736035  | -9.254941964  | -2.661580538 |
| H347  | 6.350871475  | -6.978391083  | 0.673327962  |
| H348  | 2.245586181  | -4.743499152  | -5.974247092 |
| H349  | 6.238369015  | 2.171955779   | -6.752780817 |
| H350  | 5.643891245  | 0.917513114   | 6.114902269  |
| H351  | 6.392857154  | 0.882012614   | 4.498296463  |
| H352  | 9.760861376  | -8.039242424  | -1.513257562 |
| H353  | 8.879316078  | -9.245263003  | -0.846758739 |
| H354  | 9.362611268  | -9.078887200  | 3.696559266  |
| H355  | 8.051467020  | -8.888997594  | 1.837101973  |
| H356  | 11.385719288 | -8.630396550  | 1.891999973  |
| H357  | 9.320809694  | -7.303366946  | 3.756002733  |
| H358  | 8.830137527  | 0.349599230   | 5.606790534  |
| H359  | -2.252628040 | 13.738752195  | -0.725326035 |
| H360  | 7.393450845  | -5.312445935  | 9.910639115  |
| H361  | 7.484783248  | -3.266041067  | 8.061517884  |
| H362  | -3.520514313 | 12.451274350  | -3.170690607 |
| H363  | -3.379757502 | 10.934680983  | -0.493010926 |
| H364  | -4.857021164 | 11.505713144  | -1.290543894 |
| H365  | -4.661934896 | 6.410870069   | -5.281226331 |
| H366  | 2.381890230  | -1.072203615  | 0.613456022  |
| H367  | 0.103511777  | -1.249421936  | 0.310757521  |
| H368  | -1.021442875 | 0.041837516   | -1.186172190 |
| H369  | 1.321033137  | 0.795599771   | -0.135666867 |
| Mo370 | 3.892967431  | -4.874548179  | -0.075888419 |
| N371  | -7.048713695 | -6.693579442  | -0.833885235 |
| N372  | -9.274669879 | -3.741270908  | -0.292275924 |
| N373  | -9.916388081 | -3.342345279  | 2.441605441  |
| N374  | -7.684651804 | -4.398867591  | 3.770739468  |
| N375  | -5.599310520 | -2.656926176  | 2.837135983  |
| N376  | -6.499788312 | -0.196485506  | 3.963496619  |
| N377  | -6.771862703 | -0.759810573  | 6.791399465  |
| N378  | -4.478353512 | -2.237264820  | 7.701842069  |
| N379  | -2.181605371 | -1.113354939  | 6.613660561  |
| N380  | -2.228495325 | 1.825389939   | 6.089465823  |
| N381  | -3.698477493 | 2.642403679   | 8.456911455  |
| N382  | 2.508453060  | -9.382250122  | 9.559547278  |
| N383  | 3.848409554  | -7.713825014  | 7.931881514  |
| N384  | 3.830562990  | -2.284902789  | 4.842241577  |
| N385  | 2.690631303  | -0.543417658  | 5.911964690  |
| N386  | 3.695303399  | -0.198641423  | 3.841417561  |
| N387  | 6.791582458  | -5.810348642  | 7.995796809  |
| N388  | -5.065377745 | -3.255782738  | -3.629916802 |
| N389  | -1.430982106 | -5.902953544  | -2.012316001 |
| N390  | -5.165102862 | -0.600628188  | -3.669565991 |
| N391  | -7.628853045 | 0.625041403   | -3.538969915 |
| N392  | -7.814959961 | 1.080022900   | -0.777557784 |
| N393  | -5.643730294 | 2.790997131   | -0.073144829 |

|      |              |              |              |
|------|--------------|--------------|--------------|
| N394 | -2.284689336 | 2.560806768  | -2.658804561 |
| N395 | -1.592182593 | 0.858644210  | -1.437297790 |
| N396 | -6.234512915 | 5.471071336  | -0.525419733 |
| N397 | -8.624284282 | 8.009890390  | -3.745003610 |
| N398 | -8.791990184 | 10.090045348 | -2.993255803 |
| N399 | 8.248188547  | 2.787866247  | 4.965436186  |
| N400 | 7.019316288  | 7.055065056  | -0.047389600 |
| N401 | 5.970580281  | 7.325043398  | -3.418812899 |
| N402 | 3.551771094  | 6.424751361  | -4.463180910 |
| N403 | -0.654651918 | 4.854501581  | -6.553461087 |
| N404 | 0.022103928  | 6.325410247  | -8.246014655 |
| N405 | -1.710735877 | 6.908457300  | -6.818922499 |
| N406 | 1.751773546  | 5.956901326  | -2.277176974 |
| N407 | 1.767452375  | 8.518238611  | -1.143362537 |
| N408 | 0.898763031  | 10.844939677 | -2.507305656 |
| N409 | 0.332902980  | 9.242544735  | -5.342553279 |
| N410 | -1.666954982 | 11.860654603 | -2.374397168 |
| N411 | 6.279781528  | -7.207557021 | -7.316740043 |
| N412 | 4.309407347  | -4.508391043 | -5.927592093 |
| N413 | 3.315891818  | -1.644861160 | -6.423683176 |
| N414 | 5.445725127  | 0.269895022  | -6.427128536 |
| N415 | 0.919016416  | -5.512420593 | -9.039753761 |
| N416 | -0.861076697 | -3.314980795 | -8.510761408 |
| N417 | 8.801876125  | -8.329822966 | -1.301849569 |
| N418 | 4.734362604  | -6.715070959 | -1.377284157 |
| N419 | 4.689008385  | -8.066905256 | -3.121697914 |
| N420 | 8.811366322  | -8.211735088 | 1.896227068  |
| O421 | -7.285204889 | -4.267042046 | 0.684510833  |
| O422 | -8.759759482 | -1.380965136 | 2.377543607  |
| O423 | -8.223445903 | -3.144525654 | 5.605583659  |
| O424 | -4.622040917 | -2.991141179 | 4.865582331  |
| O425 | -4.315955840 | 0.433554063  | 4.071555667  |
| O426 | -6.050830822 | 1.383889994  | 7.114545522  |
| O427 | -4.900994323 | -1.469644441 | 9.824350582  |
| O428 | -0.826291250 | -2.516261481 | 7.831560082  |
| O429 | -0.125935689 | 1.579322116  | 6.951809794  |
| O430 | -2.015328442 | 4.140972030  | 8.718752734  |
| O431 | -2.982377339 | 3.049117240  | 11.950613406 |
| O432 | 4.749198574  | -9.438433676 | 6.677758532  |
| O433 | 5.126169130  | -5.784433321 | 9.581358220  |
| O434 | 9.326210570  | -3.432320253 | 8.922397653  |
| O435 | -5.391810981 | -0.416008197 | -1.393084479 |
| O436 | -2.914292107 | -5.152412165 | -3.564486363 |
| O437 | -6.651388897 | 2.688536336  | -3.417913551 |
| O438 | -4.791342589 | 2.386424798  | -5.866016304 |
| O439 | -9.843625618 | 2.121900247  | -1.061906709 |
| O440 | -6.544018943 | 3.091336223  | 2.001254282  |
| O441 | -4.694386289 | 6.053720193  | 1.053201202  |
| O442 | -7.133986099 | 8.570828271  | 0.925436626  |
| O443 | 8.267694713  | 0.426040357  | 7.568742560  |
| O444 | 2.726877659  | 5.754085985  | 3.584157379  |
| O445 | 4.731159185  | 8.047133416  | -1.647091412 |
| O446 | 3.137927796  | 8.480096212  | -5.410188291 |
| O447 | 0.084637380  | 6.441509375  | -3.770536823 |
| O448 | -0.229257657 | 8.082702539  | -0.107815958 |
| O449 | 2.473331020  | 6.072948152  | 0.704799204  |
| O450 | 1.720485528  | 12.180969124 | -0.841056482 |
| O451 | -1.113606330 | 13.683071929 | -3.628607265 |
| O452 | -1.388299665 | 10.729986340 | -5.540203281 |
| O453 | -4.108039974 | 14.280081447 | -1.386688448 |
| O454 | -3.851026680 | 6.433911343  | -4.737424362 |

|  |                            |              |               |              |
|--|----------------------------|--------------|---------------|--------------|
|  | O455                       | 3.690038962  | -6.635196220  | -6.539357489 |
|  | O456                       | 2.045477760  | -2.970110988  | -7.797376481 |
|  | O457                       | 4.387848963  | 1.436206084   | -8.084980796 |
|  | O458                       | 8.865777943  | 1.281153602   | -7.054396177 |
|  | O459                       | -2.530979751 | -4.793558122  | -8.991278901 |
|  | O460                       | -0.255983457 | -7.804937081  | -4.248249807 |
|  | O461                       | 1.857027077  | -7.269306553  | -4.729098058 |
|  | O462                       | -1.319027858 | 0.115562698   | -9.411153316 |
|  | O463                       | 9.944845116  | -6.438177555  | 1.063168083  |
|  | O464                       | 11.904638804 | -7.756451593  | 3.660408204  |
|  | O465                       | -0.682647079 | -5.983845441  | 0.999930733  |
|  | O466                       | -0.772985807 | -7.771307980  | 2.323571778  |
|  | O467                       | 4.244727704  | -11.404180261 | 1.307040312  |
|  | O468                       | 2.277736329  | -11.253920308 | 0.204258934  |
|  | O469                       | 4.630117578  | -6.055914103  | 1.712198925  |
|  | O470                       | 3.893124954  | -7.324653542  | 3.423696561  |
|  | O471                       | 2.437566827  | -6.351906543  | 0.291443239  |
|  | O472                       | 7.540850811  | -6.298856897  | 5.290601237  |
|  | O473                       | 6.271298240  | -4.545446620  | 3.455578611  |
|  | O474                       | -2.823578081 | 4.016975055   | -4.877673122 |
|  | O475                       | 6.842095108  | -10.862210354 | 2.925992317  |
|  | O476                       | 6.091360199  | -8.527464552  | 4.424313169  |
|  | S477                       | 4.689228008  | 4.299811089   | -2.062707380 |
|  | S478                       | 2.733266039  | 1.081712429   | -2.668922670 |
|  | S479                       | 2.660574405  | -4.073735937  | -1.929174475 |
|  | S480                       | 3.529221434  | 1.458529946   | 0.664075010  |
|  | S481                       | 0.610238938  | -1.587407762  | -0.904288955 |
|  | S482                       | 5.220169502  | -1.975295115  | -3.831030586 |
|  | S483                       | 3.143003827  | -3.394019420  | 1.623300651  |
|  | S484                       | 6.255656609  | 0.883105176   | -1.635687860 |
|  | S485                       | 6.071982372  | -3.997983435  | -0.559140961 |
|  | S486                       | 6.106408211  | -1.045001625  | 1.823794341  |
|  | <b>13u(a)</b>              |              |               |              |
|  | Fe( 139)                   | 0.553        | 2.325         |              |
|  | Fe( 140)                   | 0.321        | -1.552        |              |
|  | Fe( 141)                   | 0.557        | 2.789         |              |
|  | Fe( 142)                   | 0.525        | -2.433        |              |
|  | Fe( 143)                   | 0.543        | 2.750         |              |
|  | Fe( 144)                   | 0.511        | -2.246        |              |
|  | Fe( 145)                   | 0.403        | 0.102         |              |
|  | <b>S=1</b>                 |              |               |              |
|  | bm12cnx2b262hx47unha.car_3 |              |               |              |
|  | C1                         | -8.200128033 | -4.461681021  | 0.758319873  |
|  | C2                         | -8.433782223 | -5.703959942  | -0.111584597 |
|  | C3                         | -9.143214883 | -2.327111793  | 1.544831522  |
|  | C4                         | -8.904147002 | -2.467954870  | 3.046966375  |
|  | C5                         | -9.208617860 | -3.794676233  | 5.071206371  |
|  | C6                         | -7.747756713 | -4.117228291  | 5.403108670  |
|  | C7                         | -5.629431348 | -5.040242315  | 4.588855264  |
|  | C8                         | -4.760038752 | -3.787266803  | 4.437724840  |
|  | C9                         | -4.344744989 | -1.699919984  | 3.250486722  |
|  | C10                        | -4.503849537 | -0.734292273  | 4.434682452  |
|  | C11                        | -5.976699821 | 0.226746391   | 6.111807141  |
|  | C12                        | -5.375387263 | -0.280072925  | 7.428757333  |
|  | C13                        | -5.195832781 | -2.144714535  | 9.005963158  |
|  | C14                        | -3.757466045 | -2.654631684  | 9.154837867  |
|  | C15                        | -1.851727298 | -3.766824383  | 8.070252833  |
|  | C16                        | -0.706513619 | -3.007810176  | 7.395144812  |
|  | C17                        | -0.106044390 | -1.115900947  | 5.904333292  |
|  | C18                        | 0.022179977  | 0.295663080   | 6.505056196  |
|  | C19                        | -0.431275860 | -1.127511302  | 4.387202903  |
|  | C20                        | 0.457029089  | -0.160295859  | 3.595252572  |
|  | C21                        | -0.322071468 | -2.550230521  | 3.827365230  |
|  | C22                        | -1.125288172 | 2.397587549   | 7.104219768  |
|  | C23                        | -1.213208855 | 2.339874056   | 8.641584344  |
|  | C24                        | -2.240847498 | 3.267521486   | 6.475645510  |
|  | C25                        | -2.338345534 | 4.628672500   | 7.174930875  |
|  | C26                        | -2.002621318 | 3.449740032   | 4.971121328  |
|  | C27                        | -2.365302473 | 1.531602578   | 10.618507472 |



|     |              |               |              |
|-----|--------------|---------------|--------------|
| C28 | -1.074347008 | 1.225566501   | 11.348898454 |
| C29 | 4.271301635  | -10.946203480 | 6.385816244  |
| C30 | 5.026157423  | -9.876161324  | 5.597327989  |
| C31 | 5.584895420  | -7.440018518  | 5.592815566  |
| C32 | 6.731069382  | -7.025565374  | 6.535899915  |
| C33 | 4.536800460  | -6.324005915  | 5.439706518  |
| C34 | 5.099262344  | -5.013420364  | 4.882359788  |
| C35 | 3.968130777  | -4.092069806  | 4.426639161  |
| C36 | 4.113646268  | -1.613926779  | 4.138977807  |
| C37 | 9.091553669  | -6.386071945  | 6.673197972  |
| C38 | 9.468600102  | -4.928228839  | 6.508827635  |
| C39 | -5.226264513 | -2.274651487  | -1.812153321 |
| C40 | -5.498331386 | -0.773650524  | -1.635360773 |
| C41 | -3.727228302 | -2.522782880  | -1.552631196 |
| C42 | -3.319771347 | -3.989264278  | -1.305929413 |
| C43 | -2.975665255 | -4.799089483  | -2.551772641 |
| C44 | -5.670413974 | 1.366044011   | -2.875331545 |
| C45 | -6.864425352 | 1.981872142   | -2.143149729 |
| C46 | -5.611917256 | 1.780153974   | -4.368985724 |
| C47 | -9.139333035 | 1.610652262   | -1.295232744 |
| C48 | -8.895924070 | 1.777513115   | 0.210808409  |
| C49 | -7.369074658 | 1.410257873   | 2.097532398  |
| C50 | -6.202883631 | 2.378794388   | 2.330324371  |
| C51 | -4.407843938 | 3.751056961   | 1.374338343  |
| C52 | -4.923794139 | 5.150740531   | 1.766190562  |
| C53 | -3.624880855 | 3.922178540   | 0.061870763  |
| C54 | -2.869840184 | 2.744786778   | -0.484254864 |
| C55 | -2.316953453 | 1.631093223   | 0.117806785  |
| C56 | -1.862980026 | 1.612263506   | -2.045170221 |
| C57 | -6.580902025 | 6.885473324   | 1.246791341  |
| C58 | -6.729582484 | 7.265545287   | 2.718013065  |
| C59 | -7.951460956 | 6.952614663   | 0.529249213  |
| C60 | -8.396831353 | 8.318146435   | 0.090129957  |
| C61 | -8.368090711 | 9.532471371   | 0.749997029  |
| C62 | -9.250331913 | 9.772083219   | -1.268733301 |
| C63 | 8.455365246  | 1.255071399   | 4.776537380  |
| C64 | 9.285719156  | -0.006753687  | 4.922354336  |
| C65 | 7.041856967  | 0.808803891   | 4.322186670  |
| C66 | 6.074417143  | 1.962183441   | 4.189966526  |
| C67 | 5.337482090  | 2.427823514   | 5.295212948  |
| C68 | 5.883213908  | 2.603184017   | 2.952058082  |
| C69 | 4.436138768  | 3.490582728   | 5.171660708  |
| C70 | 4.994727681  | 3.670954170   | 2.816040675  |
| C71 | 4.268109117  | 4.110103423   | 3.927304340  |
| C72 | 6.323724040  | 6.451566618   | -1.485229154 |
| C73 | 5.386443746  | 7.501897089   | -2.094972515 |
| C74 | 5.513099823  | 5.239332155   | -1.009278641 |
| C75 | 4.658898776  | 8.630503162   | -4.157537813 |
| C76 | 3.203433029  | 8.209595423   | -4.374054990 |
| C77 | 1.552330581  | 6.373414002   | -4.266847882 |
| C78 | 0.800008085  | 6.511228575   | -2.926023012 |
| C79 | 1.598992154  | 4.923492010   | -4.781379600 |
| C80 | 0.260517547  | 4.190348300   | -4.937247258 |
| C81 | -0.656999721 | 4.659181138   | -6.081263787 |
| C82 | -1.874254944 | 6.833229547   | -6.117563847 |
| C83 | 0.815857335  | 6.304244149   | -0.498004067 |
| C84 | 0.793499520  | 7.737448247   | 0.070691927  |
| C85 | 1.414300247  | 5.368329057   | 0.559583487  |
| C86 | 2.069189991  | 9.802648233   | 0.374009142  |
| C87 | 1.539325632  | 11.129512982  | -0.162219602 |
| C88 | 0.290174641  | 12.312738636  | -1.921981499 |

|       |               |               |              |
|-------|---------------|---------------|--------------|
| C89   | -1.029755229  | 12.890882036  | -1.368682862 |
| C90   | 0.205142126   | 12.133365783  | -3.454271652 |
| C91   | -0.840878705  | 11.094327875  | -3.846830961 |
| C92   | -3.086700184  | 12.446156818  | -0.105282863 |
| C93   | -3.022466691  | 13.631008231  | 0.849856531  |
| C94   | -3.758085804  | 11.236073212  | 0.597146838  |
| C95   | -3.986555326  | 10.076427145  | -0.346536319 |
| C96   | -5.130559251  | 10.032933938  | -1.157053879 |
| C97   | -3.038799285  | 9.048095288   | -0.481129830 |
| C98   | -5.322257085  | 9.007024444   | -2.086191748 |
| C99   | -3.203183915  | 8.026896507   | -1.420489933 |
| C100  | -4.346666497  | 8.017946648   | -2.215573051 |
| C101  | 4.735571033   | -5.382092940  | -7.959663066 |
| C102  | 3.310571009   | -4.991050691  | -7.606520452 |
| C103  | 1.893661977   | -3.216558695  | -6.598070189 |
| C104  | 1.519925420   | -1.951370543  | -7.372709836 |
| C105  | 1.964418213   | 0.439028029   | -7.642890968 |
| C106  | 3.147863116   | 1.390478724   | -7.772243422 |
| C107  | 5.463858452   | 1.953748427   | -7.222713197 |
| C108  | 6.476427988   | 1.642526027   | -8.306157039 |
| C109  | -1.924333241  | -4.639732317  | -8.849357087 |
| C110  | -2.900941117  | -3.457097905  | -8.835716980 |
| C111  | -1.663272512  | -5.103770266  | -7.399201330 |
| C112  | -1.033127773  | -6.508730343  | -7.364089225 |
| C113  | -0.506706935  | -6.820920292  | -5.981562087 |
| C114  | -3.207665864  | -1.051582048  | -8.488698487 |
| C115  | -2.589652507  | 0.104453643   | -9.252223884 |
| C116  | -3.636039921  | -0.728899927  | -7.037215653 |
| C117  | -2.492798623  | -0.755161516  | -6.051479324 |
| C118  | -1.632496424  | 0.347799333   | -5.908987858 |
| C119  | -2.229637991  | -1.909867357  | -5.294375586 |
| C120  | -0.530860149  | 0.281221739   | -5.050027566 |
| C121  | -1.128278429  | -1.972852456  | -4.434017108 |
| C122  | -0.267822259  | -0.877834026  | -4.312091200 |
| C123  | 7.793225709   | -7.252706634  | -2.647988523 |
| C124  | 8.838638698   | -7.348205344  | -1.524589619 |
| C125  | 6.369035643   | -7.573595103  | -2.161872139 |
| C126  | 5.275446355   | -7.346820869  | -3.160853608 |
| C127  | 5.048565343   | -8.063470982  | -4.318057720 |
| C128  | 3.395895460   | -6.624288607  | -4.004917466 |
| C129  | 9.740836804   | -8.539244431  | 0.398933235  |
| C130  | 11.164320674  | -8.469462100  | -0.105523635 |
| C131  | -0.042486168  | -7.005117147  | 1.069722301  |
| C132  | 1.391494967   | -6.636423280  | 1.350094571  |
| C133  | 2.390077399   | -7.088371495  | 0.209971910  |
| C134  | 2.168095835   | -8.600588985  | -0.086816518 |
| C135  | 3.209163344   | -9.185469265  | -1.054715625 |
| C136  | 3.171572083   | -10.685691205 | -1.142020771 |
| C137  | 3.826473286   | -6.957032253  | 0.804576545  |
| C138  | 3.874713726   | -1.240767523  | -1.717870148 |
| Fe139 | 4.121530580   | -2.706702184  | -2.990565422 |
| Fe140 | 2.708837873   | 0.284955274   | -1.496008130 |
| Fe141 | 5.168145896   | 0.023691779   | -0.739783447 |
| Fe142 | 4.544697883   | -0.162739968  | -3.257925770 |
| Fe143 | 4.355417160   | 2.234959229   | -2.153078764 |
| Fe144 | 4.760878876   | -2.500480006  | -0.443910349 |
| Fe145 | 2.319139920   | -2.348314759  | -1.174426533 |
| H146  | -6.747330528  | -6.705375633  | 0.443090440  |
| H147  | -6.617835605  | -5.970138851  | -1.009189732 |
| H148  | -10.043419178 | -3.732796605  | 0.213957398  |
| H149  | -8.923551894  | -5.396315803  | -1.048974897 |

|      |               |              |               |
|------|---------------|--------------|---------------|
| H150 | -9.169455795  | -6.330171697 | 0.423496810   |
| H151 | -8.316594858  | -1.715307140 | 1.155743335   |
| H152 | -9.994442125  | -4.209180309 | 3.109245296   |
| H153 | -10.079545875 | -1.773109700 | 1.391767533   |
| H154 | -9.835921373  | -4.637994187 | 5.389448247   |
| H155 | -7.460995614  | -4.870034565 | 3.513931603   |
| H156 | -9.485711741  | -2.915976151 | 5.667905610   |
| H157 | -3.270992209  | -1.900352371 | 3.145757877   |
| H158 | -5.806352518  | -3.205672159 | 2.752825317   |
| H159 | -5.331818740  | -5.782410984 | 3.836204449   |
| H160 | -5.549932583  | 1.218417876  | 5.914352386   |
| H161 | -6.528293875  | -1.153724295 | 4.557401317   |
| H162 | -5.426546935  | -5.452702353 | 5.584414237   |
| H163 | -4.695288201  | -1.218822797 | 2.325438268   |
| H164 | -6.133862867  | -2.178507046 | 7.090312360   |
| H165 | -7.062491445  | 0.332242283  | 6.240601201   |
| H166 | -0.983051087  | -3.250885129 | 4.357225394   |
| H167 | -0.598629401  | -2.563336003 | 2.762367787   |
| H168 | 0.710395788   | -2.925260033 | 3.902800385   |
| H169 | -1.474963013  | -0.790919016 | 4.279667905   |
| H170 | -5.869439502  | -2.986063645 | 9.225767463   |
| H171 | -1.992115472  | 2.489540662  | 4.435150244   |
| H172 | -2.909271386  | 1.124108671  | 8.599260177   |
| H173 | -2.606469556  | 4.531481164  | 8.237055967   |
| H174 | 0.148773136   | -0.151855710 | 2.539312811   |
| H175 | 1.512491705   | -0.466922582 | 3.613695066   |
| H176 | 8.360323949   | 1.710937619  | 5.781494024   |
| H177 | -2.796881388  | 4.072343532  | 4.532997764   |
| H178 | -3.106256432  | 5.245542474  | 6.685725372   |
| H179 | -1.038427885  | 3.954018896  | 4.793451363   |
| H180 | -1.379493023  | 5.168232301  | 7.116039501   |
| H181 | -3.201303319  | 2.739352942  | 6.616920509   |
| H182 | -0.149377847  | 2.862948456  | 6.901265951   |
| H183 | -1.955800446  | 0.714242144  | 6.055254436   |
| H184 | 0.389494759   | 0.872346398  | 3.968769479   |
| H185 | 1.533906636   | 4.361856342  | 0.119825298   |
| H186 | 0.691991482   | 5.308598274  | 1.388677971   |
| H187 | 2.809065774   | 5.582663278  | 1.932220731   |
| H188 | 2.913715977   | 5.345768635  | 4.565118698   |
| H189 | 4.837691062   | 4.142749785  | 1.844934666   |
| H190 | 6.414981535   | 2.241265812  | 2.069421938   |
| H191 | 5.463254296   | 1.948641383  | 6.270808920   |
| H192 | -2.052574578  | -1.709863643 | 6.577913853   |
| H193 | -1.898769229  | -4.756808963 | 7.590968093   |
| H194 | -1.571095260  | -3.913884576 | 9.121650789   |
| H195 | -3.700010984  | -3.237220708 | 7.162806338   |
| H196 | -5.335712945  | -1.382934934 | 9.783090961   |
| H197 | 3.855803848   | 3.827205802  | 6.035046403   |
| H198 | 0.873498935   | -1.583793611 | 6.069140989   |
| H199 | -2.791867527  | 2.468453952  | 11.012939279  |
| H200 | -3.067530452  | 0.714842588  | 10.851209431  |
| H201 | -0.344659831  | 0.606076523  | 10.777031814  |
| H202 | 9.952541113   | -7.015762034 | 6.402333319   |
| H203 | -1.594200082  | -6.133573667 | -3.267424726  |
| H204 | 0.211352410   | -8.519112119 | 2.242329727   |
| H205 | -1.798540316  | -7.255399614 | -7.617970296  |
| H206 | -0.219726029  | -6.579511694 | -8.101482262  |
| H207 | -2.605297991  | -5.123603228 | -6.830008975  |
| H208 | -2.025900853  | -0.206827109 | -10.164108598 |
| H209 | -2.488409462  | -5.437749288 | -9.356284557  |
| H210 | -3.145988513  | -2.103670952 | -2.387806293  |

|      |              |              |              |
|------|--------------|--------------|--------------|
| H211 | -4.132169991 | -4.525145128 | -0.783853996 |
| H212 | -1.358393295 | -2.133118249 | -8.421779357 |
| H213 | -4.124475955 | -1.295565710 | -9.061225316 |
| H214 | -0.093990646 | -3.720502809 | -9.184806194 |
| H215 | -1.271397984 | -5.552523492 | -1.636569613 |
| H216 | -1.012867196 | -4.367270440 | -6.902317283 |
| H217 | -0.226895384 | -5.220850803 | -9.843314711 |
| H218 | -6.598446557 | -3.051241523 | -3.140873876 |
| H219 | -3.445196978 | -1.947166514 | -0.660114184 |
| H220 | 1.278394333  | -6.278003805 | -6.608892228 |
| H221 | -2.448974092 | -3.992042453 | -0.635522777 |
| H222 | -3.749006288 | 3.429623351  | 2.192361772  |
| H223 | -2.315631067 | 1.289711488  | 1.148180206  |
| H224 | -8.230305276 | 1.799135537  | 2.656135032  |
| H225 | -7.123076876 | 0.689875818  | 0.108571363  |
| H226 | -6.552817746 | 4.859496065  | 0.542586387  |
| H227 | -7.994803130 | 9.826111031  | 1.724173826  |
| H228 | -7.034739562 | 6.414551190  | 3.373233069  |
| H229 | -8.716462587 | 6.470268778  | 1.163698782  |
| H230 | -5.874377244 | 7.586926630  | 0.773778588  |
| H231 | -9.702562079 | 10.260012551 | -2.127308721 |
| H232 | -2.922707082 | 4.757041212  | 0.222910932  |
| H233 | -4.327163162 | 4.256141351  | -0.717965256 |
| H234 | -9.034036839 | 11.437017209 | 0.039770629  |
| H235 | -7.883669566 | 6.341719179  | -0.384585079 |
| H236 | -5.812852142 | 2.535347845  | 0.301395476  |
| H237 | -7.091983393 | 0.452861683  | 2.562736004  |
| H238 | -9.542067932 | 2.571086769  | -1.645341942 |
| H239 | -1.466751605 | 1.270501963  | -2.996346463 |
| H240 | -9.924453874 | 0.855464120  | -1.434720539 |
| H241 | 9.894505775  | 2.583869490  | 4.173536674  |
| H242 | 8.423612080  | 2.868558439  | 3.516507973  |
| H243 | 2.400077023  | 5.716343364  | -1.854771471 |
| H244 | -0.238528955 | 6.023007936  | -0.640294862 |
| H245 | 2.537611467  | 8.194554784  | -0.911354055 |
| H246 | -3.144246857 | 3.955486718  | -3.034632986 |
| H247 | -4.916253344 | 3.632026460  | -4.248669354 |
| H248 | -3.881026089 | 5.368272793  | -3.214175651 |
| H249 | -4.667689555 | 1.369655327  | -4.775014642 |
| H250 | -6.445780644 | 1.298575985  | -4.905576642 |
| H251 | 1.204648809  | 11.872569929 | -3.830500692 |
| H252 | -0.093309337 | 13.098323670 | -3.884913145 |
| H253 | 0.633830604  | 9.641839966  | -4.262309172 |
| H254 | -1.031961050 | 9.105797826  | -4.284227415 |
| H255 | -1.376938634 | 8.235903730  | -7.522222089 |
| H256 | -1.168517563 | 3.795527599  | -6.530463426 |
| H257 | -6.227909256 | 8.977802937  | -2.697186772 |
| H258 | -2.153902837 | 9.020251151  | 0.161956557  |
| H259 | -3.215923917 | 7.380534788  | -4.652709556 |
| H260 | 2.225787672  | 4.326582573  | -4.100442462 |
| H261 | 3.639785799  | 6.277364126  | -3.810969499 |
| H262 | -0.300233359 | 4.182170039  | -3.989472592 |
| H263 | -7.945481802 | 0.279320766  | -2.474305598 |
| H264 | 5.104900336  | 8.815551983  | -5.144847578 |
| H265 | -5.567551250 | -0.694108609 | -3.628277800 |
| H266 | 2.117954217  | 4.937320440  | -5.754334265 |
| H267 | -2.433860781 | 7.264877625  | -1.551988038 |
| H268 | 4.627169758  | 9.587847902  | -3.618866574 |
| H269 | -0.850023062 | 6.636056874  | -7.891692005 |
| H270 | -3.117327096 | 8.446185622  | -6.005116039 |
| H271 | -5.026319812 | -3.515640765 | -3.436954450 |

|      |              |               |              |
|------|--------------|---------------|--------------|
| H272 | -5.791926428 | -2.765777095  | -0.996598421 |
| H273 | -5.891975072 | 10.810265906  | -1.062092378 |
| H274 | -4.782918880 | 1.774772273   | -2.369229599 |
| H275 | 1.000339121  | 7.010684309   | -4.970278159 |
| H276 | -0.051768062 | 5.117372353   | -6.873808282 |
| H277 | 0.520045608  | 3.141597130   | -5.136799178 |
| H278 | -2.324102373 | 5.277384679   | -4.884274517 |
| H279 | 1.677760511  | 9.702576753   | 1.397193455  |
| H280 | 0.621265465  | 10.186310106  | -1.736758185 |
| H281 | 1.045625852  | 13.083467078  | -1.711202614 |
| H282 | 3.161240283  | 9.904597686   | 0.440760781  |
| H283 | -1.418874751 | 11.131456401  | -0.411159950 |
| H284 | 5.331549150  | -4.483418843  | -8.175260241 |
| H285 | 5.156498120  | -5.832662244  | -7.036685460 |
| H286 | 7.824391735  | -6.206379462  | -2.984534163 |
| H287 | 5.661690202  | -6.725073991  | -9.183493647 |
| H288 | 4.066524251  | -7.022152828  | -8.957833758 |
| H289 | 6.211026968  | 4.484240260   | -0.625928438 |
| H290 | 6.443573143  | 7.424314886   | 0.304068577  |
| H291 | 6.143706960  | 7.106419498   | -3.964225431 |
| H292 | 4.828985863  | 5.545669615   | -0.204492341 |
| H293 | 7.705484923  | 7.740075332   | -0.686414470 |
| H294 | 5.962557194  | 1.953940028   | -6.241667067 |
| H295 | 7.036833046  | 6.113782099   | -2.252759083 |
| H296 | 4.057869897  | -6.149423389  | 6.417639542  |
| H297 | 5.989208550  | -7.691346399  | 4.605092125  |
| H298 | 4.416323667  | 0.201724364   | -6.626359814 |
| H299 | 4.287856598  | 0.327049607   | 3.558488159  |
| H300 | 1.590514057  | 0.239579624   | -8.656286113 |
| H301 | -0.941984571 | -2.871450137  | -3.843718738 |
| H302 | 1.168457702  | 1.001827854   | -7.128723298 |
| H303 | 3.312698844  | -3.822768581  | 5.265720170  |
| H304 | 2.772278761  | -0.908559528  | -6.143941589 |
| H305 | 3.340894750  | -4.613172408  | 3.684834593  |
| H306 | 3.762225328  | -6.711673493  | 4.759029737  |
| H307 | 5.746138262  | -5.211489824  | 4.014675259  |
| H308 | 5.715179174  | -4.499204944  | 5.638242454  |
| H309 | -4.394221213 | -1.469571456  | -6.744031899 |
| H310 | 4.450169455  | -8.592743553  | 7.017171158  |
| H311 | 3.385630835  | -11.199525466 | 5.783430621  |
| H312 | 0.581935984  | -0.910884639  | -3.625575445 |
| H313 | 4.557621525  | -10.700756330 | 8.411899778  |
| H314 | 2.997817993  | -10.995486262 | 8.003923682  |
| H315 | 4.821021157  | -2.970210771  | 2.835962864  |
| H316 | 0.136794674  | 1.137562285   | -4.932804034 |
| H317 | -2.903198640 | -2.767762371  | -5.362129564 |
| H318 | 6.760874894  | -10.452769575 | 1.036653034  |
| H319 | 6.332546100  | -8.634737448  | -1.857084775 |
| H320 | 5.714886843  | -8.464696697  | 1.963312541  |
| H321 | 6.036787996  | -11.264128431 | -0.057860698 |
| H322 | 6.140414838  | 0.901937151   | -9.073228070 |
| H323 | 5.926986840  | -5.398432251  | 1.186642097  |
| H324 | 1.725827984  | -7.075618651  | 2.301215230  |
| H325 | 3.991888018  | -3.214120112  | -6.847660827 |
| H326 | 2.225586170  | -9.141435514  | 0.870147543  |
| H327 | 3.396144640  | -7.923052068  | -5.674673801 |
| H328 | 2.459596053  | -6.104266313  | -4.162756617 |
| H329 | 4.914060394  | -11.843068618 | 6.390464212  |
| H330 | 4.596891091  | -0.828553525  | 2.302910554  |
| H331 | 7.730544580  | -6.178177033  | 2.606042946  |
| H332 | 6.889905043  | -4.179432488  | 1.208649343  |

|       |              |               |              |
|-------|--------------|---------------|--------------|
| H333  | 7.983874639  | -6.837448314  | 4.882327741  |
| H334  | 3.850827403  | -1.981256172  | 6.153006465  |
| H335  | 2.050976538  | -12.140051531 | -1.592213185 |
| H336  | 3.044236460  | -8.765390127  | -2.058158754 |
| H337  | 4.223928740  | -8.920129193  | -0.739532026 |
| H338  | 1.160783622  | -8.744457717  | -0.503885148 |
| H339  | 1.973235142  | -3.015609135  | -5.518295222 |
| H340  | -1.831308381 | 1.255156457   | -6.484292545 |
| H341  | -4.122840529 | 0.258874918   | -7.052343474 |
| H342  | 1.460470136  | -5.541611969  | 1.408865733  |
| H343  | 7.642208905  | -7.720410269  | 2.754896195  |
| H344  | 6.204369753  | -9.436428781  | 3.075604438  |
| H345  | 3.340427835  | -0.414508756  | 5.629081160  |
| H346  | 5.619991797  | -8.850792673  | -4.793261704 |
| H347  | 6.154202871  | -6.977603891  | -1.266267339 |
| H348  | 1.113221999  | -3.960650306  | -6.771190881 |
| H349  | 5.089305155  | 2.973269957   | -7.409531759 |
| H350  | 6.670757752  | 0.087897576   | 5.066694403  |
| H351  | 7.129695033  | 0.283654692   | 3.357074973  |
| H352  | 9.102959810  | -7.799913613  | -4.129166399 |
| H353  | 8.301072283  | -9.067459518  | -3.475131550 |
| H354  | 9.603917143  | -9.532608776  | 0.855536302  |
| H355  | 7.985651834  | -9.064361015  | -0.684175859 |
| H356  | 11.310360021 | -8.789548799  | -1.164699273 |
| H357  | 9.592895924  | -7.787822793  | 1.191407204  |
| H358  | 9.726695822  | -0.378306986  | 3.965581213  |
| H359  | -2.032039413 | 13.795896325  | 1.335472091  |
| H360  | 8.869574651  | -6.546253416  | 7.742524513  |
| H361  | 8.631298091  | -4.252336209  | 6.208903981  |
| H362  | -3.706666448 | 12.751649758  | -0.964751676 |
| H363  | -3.130808428 | 10.921535148  | 1.446274748  |
| H364  | -4.714644664 | 11.587783597  | 1.009663430  |
| H365  | -5.368964349 | 7.022325661   | -3.545082720 |
| H366  | 1.831852088  | -0.829420428  | -0.640149271 |
| H367  | -0.035917654 | -1.995741359  | 0.521237274  |
| H368  | -1.170968815 | 0.028329572   | -0.813773813 |
| H369  | 1.221362582  | 0.675180077   | -1.443782722 |
| Mo370 | 3.604068927  | -4.769243261  | -1.298584432 |
| N371  | -7.260637943 | -6.502230523  | -0.418291078 |
| N372  | -9.246025422 | -3.591396160  | 0.828983362  |
| N373  | -9.446624930 | -3.550944271  | 3.658116525  |
| N374  | -7.053702401 | -4.781183608  | 4.444726349  |
| N375  | -5.082116346 | -2.945317303  | 3.424383100  |
| N376  | -5.740862831 | -0.657451694  | 4.981659611  |
| N377  | -5.570416642 | -1.594602945  | 7.713068227  |
| N378  | -3.162464209 | -3.140548327  | 8.030215301  |
| N379  | -1.059716745 | -1.917076340  | 6.665935656  |
| N380  | -1.109564762 | 1.056163997   | 6.516319007  |
| N381  | -2.187656694 | 1.561507292   | 9.176758307  |
| N382  | 3.839470218  | -10.495750530 | 7.713822640  |
| N383  | 4.953190312  | -8.640491532  | 6.124493920  |
| N384  | 4.454552580  | -2.862463676  | 3.787319108  |
| N385  | 3.669321996  | -1.344154673  | 5.385075997  |
| N386  | 4.163818475  | -0.628666452  | 3.228598579  |
| N387  | 7.910428364  | -6.760568002  | 5.920380166  |
| N388  | -5.629571576 | -2.723927139  | -3.150774648 |
| N389  | -1.872761681 | -5.567625099  | -2.461545702 |
| N390  | -5.643717812 | -0.090564348  | -2.796606946 |
| N391  | -7.986644387 | 1.216770280   | -2.081921322 |
| N392  | -7.775290219 | 1.198402009   | 0.720771774  |
| N393  | -5.50002161  | 2.792929830   | 1.238353510  |

|      |              |               |              |
|------|--------------|---------------|--------------|
| N394 | -2.576985813 | 2.720978389   | -1.842050253 |
| N395 | -1.686692378 | 0.925294018   | -0.890505496 |
| N396 | -6.084585485 | 5.518142859   | 1.162111358  |
| N397 | -8.950542260 | 8.482646506   | -1.170379879 |
| N398 | -8.912032773 | 10.443244909  | -0.132234265 |
| N399 | 9.075370110  | 2.121540543   | 3.772175673  |
| N400 | 7.095861999  | 6.987345918   | -0.354924618 |
| N401 | 5.494329596  | 7.687199063   | -3.440614138 |
| N402 | 2.914136404  | 6.902397987   | -4.193558523 |
| N403 | -1.692657762 | 5.604770494   | -5.644879028 |
| N404 | -1.205802015 | 7.287951274   | -7.200938874 |
| N405 | -2.682081083 | 7.702529736   | -5.465231624 |
| N406 | 1.482838879  | 6.191657195   | -1.792364738 |
| N407 | 1.760751712  | 8.593327926   | -0.375447667 |
| N408 | 0.731572715  | 11.084546153  | -1.263884431 |
| N409 | -0.360853386 | 9.857668503   | -4.131669657 |
| N410 | -1.755264929 | 12.079110051  | -0.563237945 |
| N411 | 4.746150584  | -6.273769625  | -9.123121101 |
| N412 | 3.156860902  | -3.760301031  | -7.081620041 |
| N413 | 2.190883521  | -0.840312068  | -6.995785629 |
| N414 | 4.333375384  | 1.042942883   | -7.207219828 |
| N415 | -0.740962045 | -4.354548534  | -9.669908933 |
| N416 | -2.360093022 | -2.226029263  | -8.615459466 |
| N417 | 8.183426421  | -8.099881468  | -3.792599334 |
| N418 | 4.229449373  | -6.443102518  | -2.984615120 |
| N419 | 3.860999038  | -7.592795175  | -4.833988176 |
| N420 | 8.767021292  | -8.410205840  | -0.673333551 |
| O421 | -7.153064850 | -4.283478741  | 1.408040898  |
| O422 | -8.244901901 | -1.617086213  | 3.665640621  |
| O423 | -7.264191793 | -3.809702174  | 6.505188051  |
| O424 | -3.819393585 | -3.556181778  | 5.215244315  |
| O425 | -3.548279814 | -0.062847604  | 4.856873445  |
| O426 | -4.783248924 | 0.492280406   | 8.202222144  |
| O427 | -3.220490751 | -2.646351533  | 10.271677055 |
| O428 | 0.455563298  | -3.423891308  | 7.516837875  |
| O429 | 1.107680543  | 0.695853455   | 6.955354262  |
| O430 | -0.427407055 | 2.979894506   | 9.361339464  |
| O431 | -0.866645691 | 1.553403232   | 12.508727464 |
| O432 | 5.620995853  | -10.193306521 | 4.544957854  |
| O433 | 6.548369903  | -6.952960174  | 7.764013015  |
| O434 | 10.596190937 | -4.500109469  | 6.696914208  |
| O435 | -5.568829175 | -0.240860977  | -0.508460402 |
| O436 | -3.679110179 | -4.773359928  | -3.589151536 |
| O437 | -6.790400702 | 3.104145306   | -1.614692048 |
| O438 | -5.727279956 | 3.170733028   | -4.588163873 |
| O439 | -9.726347487 | 2.399733896   | 0.890344250  |
| O440 | -5.922868567 | 2.730066745   | 3.484339557  |
| O441 | -4.290851892 | 5.910280677   | 2.509739653  |
| O442 | -6.601709830 | 8.397597048   | 3.155600455  |
| O443 | 9.455608094  | -0.600299932  | 5.978260871  |
| O444 | 3.389447609  | 5.156556582   | 3.735572391  |
| O445 | 4.582970469  | 8.156255077   | -1.404720670 |
| O446 | 2.374611331  | 9.071200099   | -4.731139236 |
| O447 | -0.375518538 | 6.911968552   | -2.914346323 |
| O448 | -0.053186293 | 8.052816030   | 0.917692427  |
| O449 | 2.668455943  | 5.886920920   | 1.012632504  |
| O450 | 1.833441649  | 12.185023255  | 0.414187795  |
| O451 | -1.381355912 | 14.045247602  | -1.653199284 |
| O452 | -2.053776572 | 11.360201266  | -3.831541813 |
| O453 | -3.989658901 | 14.330476819  | 1.103466953  |
| O454 | -4.471047071 | 6.990153540   | -3.161862754 |

|  |                             |              |               |              |
|--|-----------------------------|--------------|---------------|--------------|
|  | O455                        | 2.367476486  | -5.805090051  | -7.774608146 |
|  | O456                        | 0.682320607  | -1.968733489  | -8.299604378 |
|  | O457                        | 2.976106851  | 2.461046643   | -8.379020981 |
|  | O458                        | 7.578965490  | 2.164119815   | -8.360337343 |
|  | O459                        | -4.121592750 | -3.628623994  | -8.989851192 |
|  | O460                        | -1.214858315 | -7.202813435  | -5.055355115 |
|  | O461                        | 0.809536586  | -6.607973999  | -5.780193401 |
|  | O462                        | -2.713009579 | 1.283871221   | -8.954899639 |
|  | O463                        | 9.779638231  | -6.536131430  | -1.443656807 |
|  | O464                        | 12.112101395 | -8.162185353  | 0.604247431  |
|  | O465                        | -0.815983099 | -6.402346479  | 0.343982680  |
|  | O466                        | -0.503938222 | -8.142990333  | 1.694217974  |
|  | O467                        | 4.099797975  | -11.442636310 | -0.863355792 |
|  | O468                        | 1.974966124  | -11.162014645 | -1.574580541 |
|  | O469                        | 4.603327624  | -6.125613841  | 0.194353626  |
|  | O470                        | 4.174890592  | -7.668250034  | 1.776674123  |
|  | O471                        | 2.230918164  | -6.303839584  | -0.915603445 |
|  | O472                        | 8.151607903  | -6.934286824  | 3.086307095  |
|  | O473                        | 6.623238788  | -4.955040980  | 1.737951540  |
|  | O474                        | -3.551655575 | 4.588877486   | -3.714582445 |
|  | O475                        | 6.917041139  | -11.158770685 | 0.359117471  |
|  | O476                        | 6.502102568  | -9.022902323  | 2.222602109  |
|  | S477                        | 4.491137115  | 4.501744981   | -2.364340580 |
|  | S478                        | 2.830026113  | 1.304955035   | -3.479319564 |
|  | S479                        | 2.151815250  | -3.743098123  | -2.900751918 |
|  | S480                        | 3.682966864  | 1.609683815   | -0.066669496 |
|  | S481                        | -0.006973393 | -2.351087569  | -0.793104492 |
|  | S482                        | 4.737463189  | -1.678365635  | -4.883618179 |
|  | S483                        | 3.028836018  | -3.416403836  | 0.608465664  |
|  | S484                        | 6.276330925  | 1.030928306   | -2.494566325 |
|  | S485                        | 5.734594886  | -3.875510802  | -1.909183726 |
|  | S486                        | 6.183165105  | -1.293977400  | 0.752424051  |
|  | <b>13u(b)</b>               |              |               |              |
|  | Fe( 139)                    | 0.563        | 2.411         |              |
|  | Fe( 140)                    | 0.315        | -1.561        |              |
|  | Fe( 141)                    | 0.559        | 2.751         |              |
|  | Fe( 142)                    | 0.526        | -2.430        |              |
|  | Fe( 143)                    | 0.552        | 2.838         |              |
|  | Fe( 144)                    | 0.509        | -2.197        |              |
|  | Fe( 145)                    | 0.479        | 2.041         |              |
|  | <b>S=2</b>                  |              |               |              |
|  | bm12cnx2b262hx47unha2.car_1 |              |               |              |
|  | C1                          | -8.200539513 | -4.461423698  | 0.760378057  |
|  | C2                          | -8.430868289 | -5.701477891  | -0.112762899 |
|  | C3                          | -9.137375336 | -2.324252553  | 1.543058286  |
|  | C4                          | -8.900615788 | -2.465767828  | 3.044283533  |
|  | C5                          | -9.208866059 | -3.794007006  | 5.067372702  |
|  | C6                          | -7.748518759 | -4.118659332  | 5.401579162  |
|  | C7                          | -5.629793418 | -5.042700002  | 4.588063238  |
|  | C8                          | -4.759369553 | -3.790253405  | 4.439298834  |
|  | C9                          | -4.343710616 | -1.701202055  | 3.255176774  |
|  | C10                         | -4.503178295 | -0.737376578  | 4.440714231  |
|  | C11                         | -5.976416063 | 0.224932883   | 6.115754765  |
|  | C12                         | -5.377846188 | -0.282502823  | 7.433424495  |
|  | C13                         | -5.195816931 | -2.148850819  | 9.007965929  |
|  | C14                         | -3.754756750 | -2.651230724  | 9.155881293  |
|  | C15                         | -1.849967277 | -3.763886341  | 8.071342099  |
|  | C16                         | -0.707584023 | -3.004912904  | 7.392715949  |
|  | C17                         | -0.108712651 | -1.117117358  | 5.898959030  |
|  | C18                         | 0.023443734  | 0.295017284   | 6.496900944  |
|  | C19                         | -0.433994043 | -1.130035406  | 4.382370937  |
|  | C20                         | 0.454551479  | -0.162753330  | 3.591197501  |
|  | C21                         | -0.324484898 | -2.553686283  | 3.824707299  |
|  | C22                         | -1.124355939 | 2.396277741   | 7.100532004  |
|  | C23                         | -1.214649797 | 2.337812461   | 8.638603926  |
|  | C24                         | -2.239771748 | 3.265186310   | 6.469822147  |
|  | C25                         | -2.339634809 | 4.626072262   | 7.169985353  |
|  | C26                         | -1.999886046 | 3.448637233   | 4.966454052  |
|  | C27                         | -2.369428549 | 1.527044285   | 10.612262990 |



|     |              |               |              |
|-----|--------------|---------------|--------------|
| C28 | -1.079026965 | 1.220924759   | 11.343945211 |
| C29 | 4.272374037  | -10.945090170 | 6.389929122  |
| C30 | 5.026609798  | -9.876957934  | 5.598860019  |
| C31 | 5.587175089  | -7.438909380  | 5.589829432  |
| C32 | 6.732497925  | -7.021268830  | 6.532618188  |
| C33 | 4.536560242  | -6.324007666  | 5.437137518  |
| C34 | 5.096701881  | -5.012042675  | 4.880032259  |
| C35 | 3.965188729  | -4.089793810  | 4.426820695  |
| C36 | 4.113834252  | -1.608476048  | 4.147528891  |
| C37 | 9.093916783  | -6.383252046  | 6.672944476  |
| C38 | 9.468259847  | -4.923857658  | 6.511185780  |
| C39 | -5.226117373 | -2.282043926  | -1.817566592 |
| C40 | -5.495457978 | -0.780434290  | -1.639509565 |
| C41 | -3.728587328 | -2.532950948  | -1.552945087 |
| C42 | -3.321802818 | -4.000007596  | -1.303233880 |
| C43 | -2.969222065 | -4.804093716  | -2.549940204 |
| C44 | -5.664747666 | 1.358306957   | -2.877635001 |
| C45 | -6.856128149 | 1.976804367   | -2.144848984 |
| C46 | -5.610987847 | 1.777131172   | -4.370123911 |
| C47 | -9.131265996 | 1.626574026   | -1.293834477 |
| C48 | -8.888195544 | 1.785578122   | 0.213871251  |
| C49 | -7.359425935 | 1.407950339   | 2.097290421  |
| C50 | -6.183109069 | 2.361249030   | 2.327596069  |
| C51 | -4.405714566 | 3.752877422   | 1.374307520  |
| C52 | -4.919903540 | 5.154385913   | 1.763921522  |
| C53 | -3.618736345 | 3.929140077   | 0.064363461  |
| C54 | -2.871455928 | 2.749627239   | -0.481889854 |
| C55 | -2.326785471 | 1.633641707   | 0.121053294  |
| C56 | -1.866073332 | 1.617101956   | -2.042080206 |
| C57 | -6.571235212 | 6.892286826   | 1.242934939  |
| C58 | -6.714361471 | 7.272509592   | 2.715254213  |
| C59 | -7.944826445 | 6.956886413   | 0.534469471  |
| C60 | -8.395544234 | 8.319491794   | 0.096832457  |
| C61 | -8.370454689 | 9.533328325   | 0.757135576  |
| C62 | -9.251821555 | 9.771274762   | -1.262553829 |
| C63 | 8.458131508  | 1.251256772   | 4.769888478  |
| C64 | 9.294380125  | -0.006975714  | 4.915898609  |
| C65 | 7.044661823  | 0.804769663   | 4.316872439  |
| C66 | 6.077745417  | 1.958162883   | 4.185711559  |
| C67 | 5.340738819  | 2.423371227   | 5.290655711  |
| C68 | 5.885922053  | 2.597862544   | 2.947535081  |
| C69 | 4.437051674  | 3.484054578   | 5.166228953  |
| C70 | 4.995709008  | 3.663875586   | 2.810439417  |
| C71 | 4.267741478  | 4.102110447   | 3.921091385  |
| C72 | 6.329304749  | 6.459869417   | -1.484202879 |
| C73 | 5.387796150  | 7.506341130   | -2.095724201 |
| C74 | 5.513901872  | 5.246317977   | -1.018582091 |
| C75 | 4.656729641  | 8.631218464   | -4.158962542 |
| C76 | 3.201466594  | 8.209425207   | -4.374651358 |
| C77 | 1.551231488  | 6.372791236   | -4.267072446 |
| C78 | 0.800204437  | 6.512264406   | -2.926038831 |
| C79 | 1.599134976  | 4.921203293   | -4.776778235 |
| C80 | 0.260896026  | 4.187399105   | -4.929178340 |
| C81 | -0.659690617 | 4.653157700   | -6.072185076 |
| C82 | -1.874213787 | 6.829978997   | -6.111583895 |
| C83 | 0.817607941  | 6.305309017   | -0.499592051 |
| C84 | 0.793812824  | 7.737510198   | 0.069286360  |
| C85 | 1.416246454  | 5.369143802   | 0.557557448  |
| C86 | 2.068194175  | 9.802752581   | 0.374569261  |
| C87 | 1.537381890  | 11.129391581  | -0.161455319 |
| C88 | 0.288753211  | 12.311591260  | -1.921543632 |

|       |               |               |              |
|-------|---------------|---------------|--------------|
| C89   | -1.030059835  | 12.888137638  | -1.365824100 |
| C90   | 0.202229595   | 12.131850861  | -3.453257552 |
| C91   | -0.843748127  | 11.092153211  | -3.844740685 |
| C92   | -3.085722426  | 12.440515172  | -0.104907185 |
| C93   | -3.024180784  | 13.629005444  | 0.846036676  |
| C94   | -3.761306972  | 11.233488590  | 0.599411533  |
| C95   | -3.990563282  | 10.073845716  | -0.342331735 |
| C96   | -5.134099560  | 10.030470524  | -1.153041847 |
| C97   | -3.043063827  | 9.045714584   | -0.475644869 |
| C98   | -5.325920896  | 9.003712675   | -2.081005072 |
| C99   | -3.206905969  | 8.023805734   | -1.414142893 |
| C100  | -4.350405616  | 8.014348241   | -2.209326644 |
| C101  | 4.739267482   | -5.390772360  | -7.961077183 |
| C102  | 3.315190844   | -4.996486488  | -7.603593736 |
| C103  | 1.899337713   | -3.220728144  | -6.592149216 |
| C104  | 1.517632490   | -1.955875793  | -7.366293849 |
| C105  | 1.969243383   | 0.437002679   | -7.636450493 |
| C106  | 3.159706599   | 1.380280686   | -7.769875668 |
| C107  | 5.473184047   | 1.947326375   | -7.224373221 |
| C108  | 6.480316608   | 1.640940828   | -8.313458674 |
| C109  | -1.922965497  | -4.641133318  | -8.856489990 |
| C110  | -2.899227647  | -3.456676545  | -8.844032045 |
| C111  | -1.663776786  | -5.105779667  | -7.404132935 |
| C112  | -1.034032998  | -6.511013532  | -7.365698589 |
| C113  | -0.506911961  | -6.820872745  | -5.983969888 |
| C114  | -3.206181759  | -1.050020330  | -8.494052201 |
| C115  | -2.588609260  | 0.108519134   | -9.254554620 |
| C116  | -3.633901027  | -0.725845183  | -7.042166240 |
| C117  | -2.490884513  | -0.754526894  | -6.056995493 |
| C118  | -1.626714876  | 0.344693611   | -5.910262209 |
| C119  | -2.233054301  | -1.912077264  | -5.302157561 |
| C120  | -0.526648702  | 0.271991662   | -5.050204369 |
| C121  | -1.131333861  | -1.982960723  | -4.442388883 |
| C122  | -0.267414940  | -0.891261389  | -4.318321807 |
| C123  | 7.792808563   | -7.252666470  | -2.641789291 |
| C124  | 8.837339420   | -7.348717612  | -1.518170137 |
| C125  | 6.369544446   | -7.571384695  | -2.153014081 |
| C126  | 5.273116717   | -7.350839519  | -3.151363206 |
| C127  | 5.046286949   | -8.058554218  | -4.315740902 |
| C128  | 3.386766753   | -6.629659951  | -3.986221797 |
| C129  | 9.742512313   | -8.542246216  | 0.399330744  |
| C130  | 11.165332776  | -8.469900334  | -0.107607601 |
| C131  | -0.041736686  | -7.000658326  | 1.074123445  |
| C132  | 1.391558220   | -6.631667590  | 1.356050443  |
| C133  | 2.387268653   | -7.094679102  | 0.216033515  |
| C134  | 2.159155283   | -8.605959201  | -0.080588097 |
| C135  | 3.201760441   | -9.182293638  | -1.051645311 |
| C136  | 3.167637169   | -10.681154413 | -1.144215104 |
| C137  | 3.827831075   | -6.965572219  | 0.802212371  |
| C138  | 3.874648269   | -1.246429938  | -1.721809579 |
| Fe139 | 4.187057492   | -2.700518288  | -3.000160683 |
| Fe140 | 2.658641017   | 0.331664398   | -1.504499733 |
| Fe141 | 5.114130082   | 0.007661253   | -0.751329423 |
| Fe142 | 4.467868653   | -0.140100328  | -3.270791753 |
| Fe143 | 4.337826181   | 2.261693219   | -2.159125619 |
| Fe144 | 4.795291459   | -2.503539809  | -0.493740820 |
| Fe145 | 2.278115909   | -2.315679859  | -1.121203996 |
| H146  | -6.743012880  | -6.696003648  | 0.447964524  |
| H147  | -6.613102382  | -5.962348677  | -1.004494683 |
| H148  | -10.037682878 | -3.725470783  | 0.206318478  |
| H149  | -8.916699147  | -5.392962935  | -1.052007994 |

|      |               |              |               |
|------|---------------|--------------|---------------|
| H150 | -9.168830951  | -6.329011410 | 0.417548527   |
| H151 | -8.309267097  | -1.715938357 | 1.152688622   |
| H152 | -9.988587372  | -4.207324610 | 3.102846471   |
| H153 | -10.071209088 | -1.767013654 | 1.389142642   |
| H154 | -9.837359434  | -4.637474441 | 5.383776665   |
| H155 | -7.459523445  | -4.868528185 | 3.511130875   |
| H156 | -9.485874326  | -2.915242480 | 5.664443997   |
| H157 | -3.270020131  | -1.901633455 | 3.150220431   |
| H158 | -5.806385083  | -3.206285726 | 2.756140627   |
| H159 | -5.332410915  | -5.783768140 | 3.833935216   |
| H160 | -5.546322528  | 1.215263688  | 5.918489488   |
| H161 | -6.528147174  | -1.153906927 | 4.560359520   |
| H162 | -5.427623299  | -5.457297104 | 5.583066873   |
| H163 | -4.693292139  | -1.218561489 | 2.330628838   |
| H164 | -6.133983953  | -2.181355805 | 7.092133259   |
| H165 | -7.062204590  | 0.333305946  | 6.242819791   |
| H166 | -0.982961929  | -3.253835739 | 4.358824005   |
| H167 | -0.603495387  | -2.570722956 | 2.760244933   |
| H168 | 0.709138454   | -2.926991843 | 3.898017593   |
| H169 | -1.477564372  | -0.793601164 | 4.274291777   |
| H170 | -5.864526790  | -2.994994579 | 9.224087983   |
| H171 | -1.986735414  | 2.489347712  | 4.430504077   |
| H172 | -2.911466518  | 1.123636342  | 8.591845938   |
| H173 | -2.607559300  | 4.529248521  | 8.232663167   |
| H174 | 0.147307055   | -0.152610001 | 2.534803811   |
| H175 | 1.510317156   | -0.468298080 | 3.610764970   |
| H176 | 8.361894482   | 1.705426271  | 5.775306745   |
| H177 | -2.795055884  | 4.068869503  | 4.528511435   |
| H178 | -3.108731848  | 5.241584205  | 6.680609906   |
| H179 | -1.037431470  | 3.955538877  | 4.791323810   |
| H180 | -1.381481170  | 5.167075061  | 7.110514506   |
| H181 | -3.199582653  | 2.735662067  | 6.611090216   |
| H182 | -0.147811399  | 2.861347016  | 6.898603325   |
| H183 | -1.956712826  | 0.710752800  | 6.057286570   |
| H184 | 0.386185105   | 0.869477068  | 3.965417787   |
| H185 | 1.534149577   | 4.361620218  | 0.118797291   |
| H186 | 0.695126458   | 5.311858877  | 1.388397948   |
| H187 | 2.817003209   | 5.574269010  | 1.924197265   |
| H188 | 2.908536879   | 5.333717335  | 4.556829174   |
| H189 | 4.837986278   | 4.134660860  | 1.839068179   |
| H190 | 6.417498024   | 2.235545739  | 2.065061806   |
| H191 | 5.466999462   | 1.945638347  | 6.266398180   |
| H192 | -2.055729096  | -1.708985426 | 6.573245369   |
| H193 | -1.895128483  | -4.755466313 | 7.595730528   |
| H194 | -1.567482301  | -3.907007981 | 9.122578863   |
| H195 | -3.700491817  | -3.240016769 | 7.165535699   |
| H196 | -5.340720551  | -1.390193362 | 9.787373521   |
| H197 | 3.856120843   | 3.820879857  | 6.029458007   |
| H198 | 0.869679545   | -1.587406975 | 6.063592434   |
| H199 | -2.795676442  | 2.463953827  | 11.008372489  |
| H200 | -3.072720521  | 0.710045696  | 10.841877685  |
| H201 | -0.348511741  | 0.600815055  | 10.773792168  |
| H202 | 9.956108437   | -7.010773790 | 6.400432991   |
| H203 | -1.583200481  | -6.132118244 | -3.268462538  |
| H204 | 0.192489573   | -8.511558528 | 2.256941710   |
| H205 | -1.799619247  | -7.257650388 | -7.618377389  |
| H206 | -0.221365030  | -6.582711091 | -8.103357354  |
| H207 | -2.606347952  | -5.122153343 | -6.835549817  |
| H208 | -1.999393153  | -0.200357412 | -10.150533675 |
| H209 | -2.485613817  | -5.437722787 | -9.366086257  |
| H210 | -3.146056395  | -2.117673790 | -2.389581674  |

|      |              |              |              |
|------|--------------|--------------|--------------|
| H211 | -4.137378432 | -4.538631363 | -0.789047349 |
| H212 | -1.356250883 | -2.132040745 | -8.431654108 |
| H213 | -4.124473640 | -1.293498685 | -9.065491803 |
| H214 | -0.090360535 | -3.725093132 | -9.175920963 |
| H215 | -1.274967725 | -5.575896725 | -1.626809279 |
| H216 | -1.012723019 | -4.366972210 | -6.911049270 |
| H217 | -0.219738210 | -5.223539807 | -9.838770846 |
| H218 | -6.594652411 | -3.050206728 | -3.156718325 |
| H219 | -3.448384296 | -1.954744422 | -0.661313869 |
| H220 | 1.279005679  | -6.275349327 | -6.609314879 |
| H221 | -2.457453793 | -4.004365606 | -0.624460630 |
| H222 | -3.749315688 | 3.429429667  | 2.194180561  |
| H223 | -2.333742351 | 1.288888372  | 1.149327571  |
| H224 | -8.214812177 | 1.814256355  | 2.651542832  |
| H225 | -7.120029649 | 0.693910076  | 0.104585736  |
| H226 | -6.553669813 | 4.863086755  | 0.547099055  |
| H227 | -8.000059168 | 9.828064758  | 1.731941122  |
| H228 | -7.025373836 | 6.419784987  | 3.366397601  |
| H229 | -8.703585133 | 6.473282843  | 1.174484822  |
| H230 | -5.864953007 | 7.591243545  | 0.766213120  |
| H231 | -9.705374024 | 10.258518117 | -2.121730512 |
| H232 | -2.912834493 | 4.759700491  | 0.234975021  |
| H233 | -4.318554585 | 4.273133228  | -0.714339213 |
| H234 | -9.034352712 | 11.438816945 | 0.044316017  |
| H235 | -7.880708914 | 6.344849189  | -0.378106621 |
| H236 | -5.800471621 | 2.528864624  | 0.296977672  |
| H237 | -7.103493452 | 0.447424615  | 2.566321479  |
| H238 | -9.520124176 | 2.594031300  | -1.642076798 |
| H239 | -1.468755980 | 1.275615368  | -2.992268154 |
| H240 | -9.927016748 | 0.882425303  | -1.435426248 |
| H241 | 9.892824743  | 2.588394326  | 4.178599734  |
| H242 | 8.425813018  | 2.866898752  | 3.512009911  |
| H243 | 2.403573554  | 5.720467724  | -1.856465882 |
| H244 | -0.236267930 | 6.023003944  | -0.642009433 |
| H245 | 2.538570952  | 8.195936469  | -0.910965179 |
| H246 | -3.142458940 | 3.955979971  | -3.026875195 |
| H247 | -4.912761490 | 3.629402655  | -4.239786106 |
| H248 | -3.882831314 | 5.364417495  | -3.208910307 |
| H249 | -4.670414899 | 1.367905333  | -4.784898526 |
| H250 | -6.448250579 | 1.297201682  | -4.902419720 |
| H251 | 1.201214292  | 11.870538095 | -3.830887895 |
| H252 | -0.097117344 | 13.096029765 | -3.884788576 |
| H253 | 0.632344827  | 9.639981794  | -4.259299292 |
| H254 | -1.033683515 | 9.102312423  | -4.280391172 |
| H255 | -1.378813947 | 8.230340567  | -7.518274744 |
| H256 | -1.175456499 | 3.787922910  | -6.513223585 |
| H257 | -6.230229758 | 8.974407624  | -2.694184285 |
| H258 | -2.157837818 | 9.019005707  | 0.166500101  |
| H259 | -3.217269987 | 7.378044409  | -4.647604615 |
| H260 | 2.224997897  | 4.325708043  | -4.093639495 |
| H261 | 3.636211551  | 6.278415229  | -3.805057066 |
| H262 | -0.298002667 | 4.182374177  | -3.980220169 |
| H263 | -7.954963406 | 0.284374702  | -2.481162869 |
| H264 | 5.102252935  | 8.813996932  | -5.146677551 |
| H265 | -5.558112594 | -0.700282876 | -3.632140521 |
| H266 | 2.118968038  | 4.931028234  | -5.749541701 |
| H267 | -2.436378109 | 7.262882496  | -1.546312639 |
| H268 | 4.624781810  | 9.589370635  | -3.621562883 |
| H269 | -0.845038935 | 6.632088428  | -7.882628089 |
| H270 | -3.119249615 | 8.441796025  | -6.001405735 |
| H271 | -5.021722142 | -3.519951220 | -3.444226040 |

|      |              |               |              |
|------|--------------|---------------|--------------|
| H272 | -5.797233055 | -2.774205156  | -1.006191097 |
| H273 | -5.894984098 | 10.808198595  | -1.059833759 |
| H274 | -4.776957401 | 1.767123982   | -2.372955293 |
| H275 | 0.997395632  | 7.006217071   | -4.972604596 |
| H276 | -0.057147343 | 5.104027540   | -6.870904666 |
| H277 | 0.520322226  | 3.137676773   | -5.125649427 |
| H278 | -2.324982182 | 5.275859525   | -4.874488243 |
| H279 | 1.677595786  | 9.701847782   | 1.398022696  |
| H280 | 0.615977911  | 10.184339980  | -1.733434573 |
| H281 | 1.044695114  | 13.082023574  | -1.712061311 |
| H282 | 3.160224889  | 9.906339931   | 0.440733764  |
| H283 | -1.416894504 | 11.126662349  | -0.409731130 |
| H284 | 5.336238498  | -4.493539326  | -8.179939013 |
| H285 | 5.164410442  | -5.842676371  | -7.040676263 |
| H286 | 7.821819633  | -6.205917742  | -2.976459456 |
| H287 | 5.658711093  | -6.735179434  | -9.188624888 |
| H288 | 4.063643594  | -7.029854586  | -8.957780794 |
| H289 | 6.204553453  | 4.481816395   | -0.642052705 |
| H290 | 6.433487929  | 7.427680587   | 0.309045676  |
| H291 | 6.140138376  | 7.104358176   | -3.963830956 |
| H292 | 4.828464756  | 5.552228754   | -0.215182617 |
| H293 | 7.699718008  | 7.752849347   | -0.675209127 |
| H294 | 5.978360549  | 1.942244104   | -6.246547886 |
| H295 | 7.048834294  | 6.127412511   | -2.249106977 |
| H296 | 4.059454743  | -6.151083853  | 6.416415277  |
| H297 | 5.990470787  | -7.691115887  | 4.601870579  |
| H298 | 4.428761706  | 0.198009436   | -6.611584026 |
| H299 | 4.276021693  | 0.336114197   | 3.567903657  |
| H300 | 1.589962151  | 0.243361896   | -8.648896958 |
| H301 | -0.945722552 | -2.886038881  | -3.857513057 |
| H302 | 1.182343234  | 1.010138026   | -7.118848463 |
| H303 | 3.306047698  | -3.826762394  | 5.265221310  |
| H304 | 2.789418509  | -0.920651865  | -6.152091367 |
| H305 | 3.339607322  | -4.609654648  | 3.683205662  |
| H306 | 3.761529889  | -6.713370322  | 4.757567394  |
| H307 | 5.742485788  | -5.209307323  | 4.011335494  |
| H308 | 5.712946282  | -4.498557324  | 5.635857339  |
| H309 | -4.390742179 | -1.467598865  | -6.747847063 |
| H310 | 4.457355649  | -8.590865696  | 7.018351106  |
| H311 | 3.388661346  | -11.204907886 | 5.787212518  |
| H312 | 0.586950894  | -0.932920905  | -3.639071891 |
| H313 | 4.553211962  | -10.703670329 | 8.416482932  |
| H314 | 2.994635478  | -10.994998222 | 8.003428601  |
| H315 | 4.815533130  | -2.961852437  | 2.839645294  |
| H316 | 0.144967425  | 1.124137031   | -4.928847229 |
| H317 | -2.909943724 | -2.767361522  | -5.373803340 |
| H318 | 6.759740708  | -10.463217802 | 1.040034037  |
| H319 | 6.334698381  | -8.629267540  | -1.835685308 |
| H320 | 5.705758813  | -8.474843715  | 1.975401544  |
| H321 | 6.035994423  | -11.265320381 | -0.060715593 |
| H322 | 6.141636947  | 0.902170861   | -9.080646440 |
| H323 | 5.940092053  | -5.410244641  | 1.184769530  |
| H324 | 1.725558981  | -7.053639041  | 2.315769291  |
| H325 | 3.996446584  | -3.226301274  | -6.824087545 |
| H326 | 2.203560626  | -9.157868785  | 0.871242095  |
| H327 | 3.384379242  | -7.915105457  | -5.664766502 |
| H328 | 2.453580368  | -6.104441859  | -4.138456102 |
| H329 | 4.919568234  | -11.838984323 | 6.399557590  |
| H330 | 4.611477087  | -0.821247019  | 2.314575074  |
| H331 | 7.730511028  | -6.180480831  | 2.601104200  |
| H332 | 6.871306405  | -4.169773910  | 1.208967855  |

|       |              |               |              |
|-------|--------------|---------------|--------------|
| H333  | 7.987656191  | -6.837211128  | 4.881200295  |
| H334  | 3.829412726  | -1.997061049  | 6.154147739  |
| H335  | 2.041670590  | -12.134252599 | -1.591933534 |
| H336  | 3.027330152  | -8.756797916  | -2.050832137 |
| H337  | 4.216570352  | -8.911832226  | -0.740883257 |
| H338  | 1.154881309  | -8.739706860  | -0.508509182 |
| H339  | 1.987905370  | -3.015806037  | -5.514208867 |
| H340  | -1.819396528 | 1.254147591   | -6.483566106 |
| H341  | -4.118081131 | 0.262540945   | -7.059185023 |
| H342  | 1.459867539  | -5.536015039  | 1.394504642  |
| H343  | 7.645365600  | -7.726386497  | 2.756339210  |
| H344  | 6.217558121  | -9.447037902  | 3.077044799  |
| H345  | 3.315724228  | -0.423919365  | 5.643211111  |
| H346  | 5.621018420  | -8.838013388  | -4.804115407 |
| H347  | 6.154642360  | -6.965726464  | -1.263977662 |
| H348  | 1.117375624  | -3.965682592  | -6.754008326 |
| H349  | 5.094951679  | 2.967348701   | -7.403525734 |
| H350  | 6.675160106  | 0.084744861   | 5.063083786  |
| H351  | 7.129621375  | 0.277929093   | 3.352434500  |
| H352  | 9.098584218  | -7.799027997  | -4.126409404 |
| H353  | 8.298215311  | -9.067167444  | -3.472415435 |
| H354  | 9.609691460  | -9.538823973  | 0.851537881  |
| H355  | 7.984584068  | -9.066275121  | -0.680263888 |
| H356  | 11.309784311 | -8.785015153  | -1.168322277 |
| H357  | 9.594662577  | -7.793990778  | 1.194494577  |
| H358  | 9.741328995  | -0.374267217  | 3.960568714  |
| H359  | -2.034004558 | 13.796459034  | 1.331669723  |
| H360  | 8.873254848  | -6.544281344  | 7.742484990  |
| H361  | 8.629877873  | -4.249001626  | 6.211741673  |
| H362  | -3.702769503 | 12.743070493  | -0.967133812 |
| H363  | -3.136935477 | 10.919638058  | 1.450751747  |
| H364  | -4.717570106 | 11.589778402  | 1.008953235  |
| H365  | -5.372335856 | 7.019421603   | -3.539220583 |
| H366  | 1.702172381  | -0.698733273  | -0.759406892 |
| H367  | -0.032335264 | -1.844653550  | 0.518721265  |
| H368  | -1.180589708 | 0.042884829   | -0.803939969 |
| H369  | 1.224745275  | 0.818051466   | -1.366357254 |
| Mo370 | 3.613763077  | -4.793481240  | -1.334687526 |
| N371  | -7.254995611 | -6.498359533  | -0.415834560 |
| N372  | -9.243574810 | -3.588123384  | 0.826729069  |
| N373  | -9.444088524 | -3.548583192  | 3.654015090  |
| N374  | -7.053926619 | -4.782210275  | 4.443135172  |
| N375  | -5.081212532 | -2.946800144  | 3.427083654  |
| N376  | -5.740404419 | -0.660318354  | 4.986760756  |
| N377  | -5.571603945 | -1.597554711  | 7.715924008  |
| N378  | -3.161652001 | -3.140512889  | 8.031708196  |
| N379  | -1.062858845 | -1.915942271  | 6.661863661  |
| N380  | -1.108454784 | 1.054681927   | 6.513336535  |
| N381  | -2.190563674 | 1.559657080   | 9.171359392  |
| N382  | 3.837301740  | -10.494461043 | 7.717269895  |
| N383  | 4.957291350  | -8.640148540  | 6.124172892  |
| N384  | 4.450964500  | -2.857796569  | 3.791884166  |
| N385  | 3.674847446  | -1.341879838  | 5.395778430  |
| N386  | 4.168511951  | -0.622306567  | 3.238480351  |
| N387  | 7.913471788  | -6.759356112  | 5.919079667  |
| N388  | -5.624191933 | -2.727015886  | -3.159633908 |
| N389  | -1.861038892 | -5.565516679  | -2.462828959 |
| N390  | -5.638236371 | -0.097222893  | -2.800537280 |
| N391  | -7.982728562 | 1.218754038   | -2.080655956 |
| N392  | -7.769450052 | 1.200461288   | 0.721184172  |
| N393  | -5.496235888 | 2.794032765   | 1.233709722  |

|      |              |               |              |
|------|--------------|---------------|--------------|
| N394 | -2.575474347 | 2.727099472   | -1.838011384 |
| N395 | -1.697913966 | 0.929668987   | -0.887148355 |
| N396 | -6.080439330 | 5.523652769   | 1.160698076  |
| N397 | -8.949266366 | 8.482324358   | -1.163507143 |
| N398 | -8.915571933 | 10.443623068  | -0.125388063 |
| N399 | 9.079457750  | 2.122164678   | 3.769684594  |
| N400 | 7.092681790  | 6.995998049   | -0.347138044 |
| N401 | 5.495001357  | 7.691042795   | -3.441433723 |
| N402 | 2.912737755  | 6.902197387   | -4.195240484 |
| N403 | -1.692020538 | 5.602537482   | -5.637364117 |
| N404 | -1.205886404 | 7.283867291   | -7.194818316 |
| N405 | -2.684035180 | 7.698682725   | -5.460974819 |
| N406 | 1.484471834  | 6.192830624   | -1.793490394 |
| N407 | 1.760735599  | 8.593866701   | -0.375854157 |
| N408 | 0.730584441  | 11.083775172  | -1.263755912 |
| N409 | -0.362905842 | 9.855170366   | -4.128260829 |
| N410 | -1.752604045 | 12.074927478  | -0.558952894 |
| N411 | 4.744020287  | -6.282599279  | -9.124709955 |
| N412 | 3.161944174  | -3.765593848  | -7.077797307 |
| N413 | 2.187026082  | -0.844301870  | -6.990532648 |
| N414 | 4.345406338  | 1.032070214   | -7.205917681 |
| N415 | -0.733987302 | -4.356274917  | -9.669576763 |
| N416 | -2.358906227 | -2.225200585  | -8.622362962 |
| N417 | 8.180154889  | -8.098867579  | -3.787313205 |
| N418 | 4.222244932  | -6.453278922  | -2.966055178 |
| N419 | 3.854443678  | -7.587545585  | -4.824732826 |
| N420 | 8.767203150  | -8.413390433  | -0.670468859 |
| O421 | -7.155760693 | -4.286688804  | 1.415495211  |
| O422 | -8.243489515 | -1.614579942  | 3.664617725  |
| O423 | -7.266169652 | -3.812621909  | 6.504647722  |
| O424 | -3.818447010 | -3.561117447  | 5.217007462  |
| O425 | -3.547381806 | -0.067466693  | 4.864637193  |
| O426 | -4.787574038 | 0.489470424   | 8.208736292  |
| O427 | -3.214603706 | -2.635614071  | 10.271041633 |
| O428 | 0.455460122  | -3.418690018  | 7.512783810  |
| O429 | 1.112608695  | 0.695911197   | 6.938496513  |
| O430 | -0.429270134 | 2.977528016   | 9.359132576  |
| O431 | -0.872307793 | 1.550213674   | 12.503227729 |
| O432 | 5.619722492  | -10.197650880 | 4.546677310  |
| O433 | 6.547580378  | -6.944938821  | 7.760146866  |
| O434 | 10.594724148 | -4.493819630  | 6.701221130  |
| O435 | -5.565135113 | -0.248459849  | -0.512158756 |
| O436 | -3.669894096 | -4.774878489  | -3.588811261 |
| O437 | -6.778235542 | 3.099317375   | -1.618159796 |
| O438 | -5.725900959 | 3.168045206   | -4.582549063 |
| O439 | -9.717912280 | 2.407222997   | 0.894922617  |
| O440 | -5.887269155 | 2.699765181   | 3.481060774  |
| O441 | -4.280925118 | 5.913639037   | 2.502507336  |
| O442 | -6.580916950 | 8.402512011   | 3.156177981  |
| O443 | 9.465514679  | -0.600322275  | 5.971795661  |
| O444 | 3.386415191  | 5.146799966   | 3.727961638  |
| O445 | 4.578945808  | 8.153462983   | -1.405411516 |
| O446 | 2.372824081  | 9.071160658   | -4.732168663 |
| O447 | -0.375134327 | 6.913959602   | -2.912565270 |
| O448 | -0.054291572 | 8.053300566   | 0.914851945  |
| O449 | 2.671973899  | 5.886976660   | 1.008048327  |
| O450 | 1.831010636  | 12.185078390  | 0.414903273  |
| O451 | -1.384552979 | 14.042147155  | -1.648332499 |
| O452 | -2.057028170 | 11.356728270  | -3.828994871 |
| O453 | -3.992053951 | 14.328541928  | 1.097359443  |
| O454 | -4.474111136 | 6.987764566   | -3.156775728 |

|                       |                       |              |               |              |
|-----------------------|-----------------------|--------------|---------------|--------------|
|                       | O455                  | 2.371215631  | -5.809653207  | -7.773321817 |
|                       | O456                  | 0.672470137  | -1.975505067  | -8.286928127 |
|                       | O457                  | 2.990442834  | 2.449828591   | -8.379948144 |
|                       | O458                  | 7.583261537  | 2.161386448   | -8.371015778 |
|                       | O459                  | -4.120098705 | -3.629204409  | -8.997064074 |
|                       | O460                  | -1.213124511 | -7.208360519  | -5.058500945 |
|                       | O461                  | 0.808116714  | -6.605099716  | -5.781757626 |
|                       | O462                  | -2.736606335 | 1.287832654   | -8.968960247 |
|                       | O463                  | 9.776677907  | -6.535211347  | -1.434247810 |
|                       | O464                  | 12.114809712 | -8.166601274  | 0.601611840  |
|                       | O465                  | -0.807112413 | -6.399542227  | 0.338713143  |
|                       | O466                  | -0.514055268 | -8.131115765  | 1.701191477  |
|                       | O467                  | 4.095045699  | -11.438693012 | -0.865158240 |
|                       | O468                  | 1.970809576  | -11.155849768 | -1.578183428 |
|                       | O469                  | 4.609035633  | -6.152290271  | 0.171508428  |
|                       | O470                  | 4.176294739  | -7.662282966  | 1.784957901  |
|                       | O471                  | 2.225794611  | -6.317504828  | -0.915247161 |
|                       | O472                  | 8.152787053  | -6.937142536  | 3.084583951  |
|                       | O473                  | 6.627929398  | -4.955497205  | 1.735814433  |
|                       | O474                  | -3.551592443 | 4.587192381   | -3.707332243 |
|                       | O475                  | 6.915740773  | -11.164238655 | 0.357908416  |
|                       | O476                  | 6.500464122  | -9.027396882  | 2.222014032  |
|                       | S477                  | 4.493400824  | 4.525638535   | -2.380021382 |
|                       | S478                  | 2.786929806  | 1.351517360   | -3.491464436 |
|                       | S479                  | 2.194870023  | -3.730317775  | -2.924479555 |
|                       | S480                  | 3.646970436  | 1.633724627   | -0.070685816 |
|                       | S481                  | -0.001754995 | -2.435300992  | -0.706999065 |
|                       | S482                  | 4.728745392  | -1.636345709  | -4.906876636 |
|                       | S483                  | 3.092631001  | -3.462872827  | 0.603508970  |
|                       | S484                  | 6.218874635  | 1.017483618   | -2.486680299 |
|                       | S485                  | 5.763696373  | -3.922853105  | -1.924393886 |
|                       | S486                  | 6.158647675  | -1.275237943  | 0.750580915  |
| <b>14(a)</b>          | bmlcnx2b262hx35.car_1 |              |               |              |
| Fe( 139) 0.571 -2.556 | C1                    | -8.328255279 | -4.267328416  | 0.764376647  |
| Fe( 140) 0.273 0.439  | C2                    | -8.542229650 | -5.576596496  | -0.002345229 |
| Fe( 141) 0.529 -2.305 | C3                    | -9.232093361 | -2.043436776  | 1.291049212  |
| Fe( 142) 0.587 2.915  | C4                    | -9.077350862 | -2.034932817  | 2.809942930  |
| Fe( 143) 0.592 3.143  | C5                    | -9.522227282 | -3.147442798  | 4.937483128  |
| Fe( 144) 0.503 2.159  | C6                    | -8.088872131 | -3.468594500  | 5.377888648  |
| Fe( 145) 0.335 -0.399 | C7                    | -5.956387282 | -4.509560825  | 4.770609564  |
| <b>S=2</b>            | C8                    | -5.051290550 | -3.295913660  | 4.535576543  |
|                       | C9                    | -4.542596565 | -1.342071012  | 3.169779082  |
|                       | C10                   | -4.735937022 | -0.267360716  | 4.249072724  |
|                       | C11                   | -6.253208155 | 0.865512045   | 5.773045256  |
|                       | C12                   | -5.714808105 | 0.478863938   | 7.157322041  |
|                       | C13                   | -5.642935868 | -1.216401965  | 8.921679553  |
|                       | C14                   | -4.226639399 | -1.745729514  | 9.179116099  |
|                       | C15                   | -2.311437368 | -3.001898269  | 8.284167000  |
|                       | C16                   | -1.121544466 | -2.333101099  | 7.589651877  |
|                       | C17                   | -0.415623165 | -0.581385003  | 5.978287770  |
|                       | C18                   | -0.303416531 | 0.877490740   | 6.459579603  |
|                       | C19                   | -0.661924439 | -0.730032795  | 4.452784169  |
|                       | C20                   | 0.292907260  | 0.137743631   | 3.626133817  |
|                       | C21                   | -0.566841178 | -2.203340820  | 4.037210032  |
|                       | C22                   | -1.428447846 | 3.042730646   | 6.790673294  |
|                       | C23                   | -1.567210727 | 3.138765486   | 8.323358917  |
|                       | C24                   | -2.504526439 | 3.869439056   | 6.045801790  |
|                       | C25                   | -2.597570564 | 5.290991461   | 6.613308143  |
|                       | C26                   | -2.206388935 | 3.914072590   | 4.541723816  |
|                       | C27                   | -2.796766175 | 2.539628188   | 10.329073866 |



|     |              |               |              |
|-----|--------------|---------------|--------------|
| C28 | -1.541871869 | 2.271206309   | 11.134570285 |
| C29 | 3.731312755  | -10.397175107 | 7.597250149  |
| C30 | 4.550455384  | -9.428519971  | 6.744017429  |
| C31 | 5.153407815  | -7.013560912  | 6.521371430  |
| C32 | 6.260695207  | -6.537528901  | 7.479575691  |
| C33 | 4.148752888  | -5.888981667  | 6.214284006  |
| C34 | 4.785404427  | -4.667303781  | 5.547996597  |
| C35 | 3.715281922  | -3.703042160  | 5.041047344  |
| C36 | 3.921137694  | -1.291824533  | 4.419788043  |
| C37 | 8.623402763  | -5.929506422  | 7.681685833  |
| C38 | 9.082289155  | -4.522558434  | 7.360884017  |
| C39 | -5.180501600 | -2.458608852  | -1.823424786 |
| C40 | -5.524830103 | -0.960826201  | -1.808539394 |
| C41 | -3.672779837 | -2.622477652  | -1.536903272 |
| C42 | -3.229918506 | -4.040963784  | -1.122966292 |
| C43 | -2.851186377 | -4.975485705  | -2.269745512 |
| C44 | -5.694891759 | 1.009554538   | -3.293197278 |
| C45 | -7.028688649 | 1.691680749   | -2.966592598 |
| C46 | -5.269694646 | 1.331554963   | -4.741284432 |
| C47 | -9.176862743 | 1.490467996   | -1.807978500 |
| C48 | -8.939557888 | 1.905693435   | -0.347435177 |
| C49 | -7.456100198 | 1.804523228   | 1.605949067  |
| C50 | -6.347236563 | 2.838829862   | 1.816880544  |
| C51 | -4.378176850 | 4.008088844   | 0.927832245  |
| C52 | -4.842071045 | 5.452335329   | 1.162693952  |
| C53 | -3.504874254 | 4.037817437   | -0.338555470 |
| C54 | -2.958715725 | 2.705215288   | -0.724673334 |
| C55 | -2.770926777 | 1.527743133   | -0.027486816 |
| C56 | -2.014492747 | 1.153894861   | -2.003977057 |
| C57 | -6.372477362 | 7.178881939   | 0.316243462  |
| C58 | -6.613584854 | 7.749389378   | 1.712190744  |
| C59 | -7.685060504 | 7.173491384   | -0.503418183 |
| C60 | -8.127949520 | 8.483170272   | -1.087392693 |
| C61 | -8.130749627 | 9.758954307   | -0.556363697 |
| C62 | -8.963943275 | 9.776000223   | -2.609535046 |
| C63 | 8.239052890  | 1.508294425   | 5.063440288  |
| C64 | 9.037314085  | 0.255635894   | 5.371578271  |
| C65 | 6.833399091  | 1.052240753   | 4.593736371  |
| C66 | 5.913822052  | 2.214951575   | 4.302616628  |
| C67 | 5.169938575  | 2.828969219   | 5.327054341  |
| C68 | 5.783606961  | 2.725315185   | 2.998076109  |
| C69 | 4.323671238  | 3.910570900   | 5.061538529  |
| C70 | 4.949939591  | 3.809072874   | 2.719066546  |
| C71 | 4.217854042  | 4.399752556   | 3.753570272  |
| C72 | 6.493417725  | 6.154684049   | -1.736232770 |
| C73 | 5.645842641  | 7.183349539   | -2.493886529 |
| C74 | 5.589052097  | 5.047340964   | -1.178294337 |
| C75 | 5.053584165  | 8.110887566   | -4.690546641 |
| C76 | 3.598345912  | 7.707060056   | -4.943098299 |
| C77 | 1.892485196  | 5.928291882   | -4.718207642 |
| C78 | 1.063718363  | 6.166334313   | -3.435583658 |
| C79 | 1.961148796  | 4.446816458   | -5.134303274 |
| C80 | 0.640506587  | 3.711253328   | -5.378491245 |
| C81 | -0.181608740 | 4.133958666   | -6.605685788 |
| C82 | -1.345106626 | 6.323001432   | -6.905452452 |
| C83 | 0.978877602  | 6.219493164   | -1.000419563 |
| C84 | 0.956256742  | 7.701774471   | -0.581462936 |
| C85 | 1.530741784  | 5.396798554   | 0.172931704  |
| C86 | 2.276607398  | 9.752432470   | -0.396626854 |
| C87 | 1.817489679  | 11.033475181  | -1.087432301 |
| C88 | 0.690536127  | 12.060573379  | -3.018391499 |

|       |               |               |              |
|-------|---------------|---------------|--------------|
| C89   | -0.641965116  | 12.708826035  | -2.584784016 |
| C90   | 0.680337086   | 11.735846965  | -4.528238692 |
| C91   | -0.364015644  | 10.679625450  | -4.874203794 |
| C92   | -2.745607181  | 12.428163648  | -1.351766265 |
| C93   | -2.682815982  | 13.682320110  | -0.489513003 |
| C94   | -3.480625667  | 11.297965632  | -0.583359185 |
| C95   | -3.706296293  | 10.078153820  | -1.447212957 |
| C96   | -4.803933461  | 10.019005153  | -2.319027089 |
| C97   | -2.798633944  | 9.005521648   | -1.446706808 |
| C98   | -4.984541752  | 8.935541852   | -3.183099100 |
| C99   | -2.948126617  | 7.925297885   | -2.321943968 |
| C100  | -4.042331407  | 7.904894640   | -3.184927082 |
| C101  | 5.003571603   | -6.178072568  | -7.204995538 |
| C102  | 3.568119590   | -5.733158406  | -6.977336214 |
| C103  | 2.118299850   | -3.863937183  | -6.222456149 |
| C104  | 1.810402752   | -2.664566557  | -7.125852302 |
| C105  | 2.334029688   | -0.312984786  | -7.572848352 |
| C106  | 3.558796143   | 0.582116097   | -7.741125419 |
| C107  | 5.832497385   | 1.183507929   | -7.064752053 |
| C108  | 6.907801295   | 0.703527906   | -8.019149677 |
| C109  | -1.606739287  | -5.406384814  | -8.480690145 |
| C110  | -2.548787139  | -4.202729713  | -8.605086836 |
| C111  | -1.418113021  | -5.759815262  | -6.986516973 |
| C112  | -0.814501999  | -7.165335965  | -6.809833488 |
| C113  | -0.336122945  | -7.369101084  | -5.390089351 |
| C114  | -2.808813307  | -1.773051608  | -8.513095682 |
| C115  | -2.103277458  | -0.688464573  | -9.304539312 |
| C116  | -3.374727778  | -1.308131678  | -7.148148267 |
| C117  | -2.288748577  | -1.208074309  | -6.111246332 |
| C118  | -1.488764767  | -0.058359034  | -6.012103461 |
| C119  | -1.970692344  | -2.324122362  | -5.319345141 |
| C120  | -0.363034226  | -0.055197760  | -5.184951924 |
| C121  | -0.841507952  | -2.320557302  | -4.497418709 |
| C122  | -0.018682575  | -1.192425983  | -4.451952365 |
| C123  | 7.769975265   | -7.637790769  | -1.601747430 |
| C124  | 8.759925672   | -7.642711157  | -0.424792079 |
| C125  | 6.323464411   | -7.909310056  | -1.161301189 |
| C126  | 5.272729222   | -7.743032120  | -2.217747065 |
| C127  | 5.057363106   | -8.548741720  | -3.318809883 |
| C128  | 3.440514545   | -7.042731733  | -3.179762042 |
| C129  | 9.551230861   | -8.656586344  | 1.642485538  |
| C130  | 10.993618269  | -8.670781660  | 1.187671454  |
| C131  | -0.166944826  | -6.653812694  | 1.655407005  |
| C132  | 1.267192824   | -6.470382189  | 2.064221515  |
| C133  | 2.281368151   | -7.079273483  | 1.012849291  |
| C134  | 2.006003840   | -8.602483943  | 0.845674714  |
| C135  | 3.065480223   | -9.297231225  | -0.026203752 |
| C136  | 3.003436838   | -10.797363141 | 0.017769859  |
| C137  | 3.702055107   | -6.949484855  | 1.641727150  |
| C138  | 3.918935885   | -1.499356042  | -1.392528136 |
| Fe139 | 4.288471332   | -3.043412004  | -2.567685112 |
| Fe140 | 2.404426825   | -0.095287201  | -1.055255905 |
| Fe141 | 5.027528270   | -0.129713687  | -0.505769180 |
| Fe142 | 4.300901175   | -0.450327405  | -3.018161072 |
| Fe143 | 4.246123723   | 1.995151018   | -1.835629614 |
| Fe144 | 4.862528368   | -2.640318626  | -0.059298824 |
| Fe145 | 2.430917085   | -2.512932455  | -0.687268557 |
| H146  | -6.887903563  | -6.530002928  | 0.712892556  |
| H147  | -6.691951235  | -5.935526621  | -0.793953301 |
| H148  | -10.113346512 | -3.540844025  | 0.048789407  |
| H149  | -8.989695282  | -5.354452700  | -0.983989453 |

|      |               |              |               |
|------|---------------|--------------|---------------|
| H150 | -9.304887796  | -6.147654420 | 0.555887632   |
| H151 | -8.358363052  | -1.509467741 | 0.891585848   |
| H152 | -10.207787197 | -3.741184965 | 2.984503207   |
| H153 | -10.131448575 | -1.469795227 | 1.030006546   |
| H154 | -10.187834270 | -3.942601987 | 5.297813194   |
| H155 | -7.726218434  | -4.409000003 | 3.588457659   |
| H156 | -9.807382479  | -2.208184930 | 5.429796885   |
| H157 | -3.467181549  | -1.558360047 | 3.127655911   |
| H158 | -6.000675884  | -2.872751201 | 2.748386848   |
| H159 | -5.640825998  | -5.333432817 | 4.116008402   |
| H160 | -5.792490158  | 1.824392076  | 5.503620867   |
| H161 | -6.770617796  | -0.651197407 | 4.337168311   |
| H162 | -5.811644146  | -4.818117221 | 5.813004138   |
| H163 | -4.852489711  | -0.943519878 | 2.192790908   |
| H164 | -6.510705510  | -1.426177401 | 6.982782196   |
| H165 | -7.340191350  | 1.009623611  | 5.843417469   |
| H166 | -1.292038269  | -2.827006073 | 4.579795303   |
| H167 | -0.765801030  | -2.307905355 | 2.960327364   |
| H168 | 0.442886992   | -2.601745284 | 4.224875877   |
| H169 | -1.689379691  | -0.382227964 | 4.258278883   |
| H170 | -6.345651833  | -2.014603973 | 9.203023837   |
| H171 | -2.205996678  | 2.914370052  | 4.085319502   |
| H172 | -3.272296640  | 1.938575923  | 8.338317949   |
| H173 | -2.863906557  | 5.299434545  | 7.680327611   |
| H174 | 0.048510075   | 0.055920282  | 2.557218409   |
| H175 | 1.335061899   | -0.191618465 | 3.739068060   |
| H176 | 8.114467935   | 2.065367239  | 6.012032398   |
| H177 | -2.963056148  | 4.524828337  | 4.027511858   |
| H178 | -3.363668566  | 5.862421192  | 6.068865077   |
| H179 | -1.221419398  | 4.374660680  | 4.360520646   |
| H180 | -1.636997804  | 5.818465064  | 6.499629321   |
| H181 | -3.479563981  | 3.372535201  | 6.199604731   |
| H182 | -0.438063358  | 3.473079063  | 6.579613907   |
| H183 | -2.240324596  | 1.289394044  | 5.844245980   |
| H184 | 0.235025800   | 1.201744249  | 3.901560278   |
| H185 | 1.678741925   | 4.352968890  | -0.157093923  |
| H186 | 0.769954539   | 5.411279364  | 0.969500065   |
| H187 | 2.873870620   | 5.729087008  | 1.573493485   |
| H188 | 2.894387392   | 5.743480333  | 4.211484564   |
| H189 | 4.841032191   | 4.177615489  | 1.698631555   |
| H190 | 6.319588014   | 2.244225693  | 2.176693590   |
| H191 | 5.243593142   | 2.452331124  | 6.350664112   |
| H192 | -2.400097518  | -1.070278592 | 6.625490740   |
| H193 | -2.367635074  | -4.032492672 | 7.903017457   |
| H194 | -2.077924271  | -3.048800779 | 9.355864293   |
| H195 | -4.106572478  | -2.512835692 | 7.253061649   |
| H196 | -5.789098436  | -0.374823528 | 9.611022909   |
| H197 | 3.738972324   | 4.366422062  | 5.864999428   |
| H198 | 0.548412637   | -1.040324135 | 6.234437600   |
| H199 | -3.203010289  | 3.522414486  | 10.618119307  |
| H200 | -3.533976676  | 1.772357348  | 10.613863770  |
| H201 | -0.800454444  | 1.597467139  | 10.646689432  |
| H202 | 9.468702963   | -6.623695739 | 7.557440664   |
| H203 | -1.519656361  | -6.454911985 | -2.765436353  |
| H204 | -0.189198473  | -8.256195952 | 2.729850436   |
| H205 | -1.583292121  | -7.920805192 | -7.025015170  |
| H206 | 0.020112232   | -7.310899553 | -7.511512410  |
| H207 | -2.385222829  | -5.719017027 | -6.461433265  |
| H208 | -1.340972446  | -1.065766401 | -10.027866565 |
| H209 | -2.171031818  | -6.226627535 | -8.950313639  |
| H210 | -3.105069469  | -2.290988627 | -2.419930383  |

|      |               |              |              |
|------|---------------|--------------|--------------|
| H211 | -4.034352255  | -4.539394637 | -0.553411978 |
| H212 | -0.990697981  | -2.879022020 | -8.238165135 |
| H213 | -3.677229753  | -2.047716119 | -9.146082075 |
| H214 | 0.251850560   | -4.545075538 | -8.813414249 |
| H215 | -1.287849660  | -5.770387865 | -1.157926177 |
| H216 | -0.775579245  | -4.996604244 | -6.520688081 |
| H217 | 0.126741483   | -6.102224398 | -9.327922945 |
| H218 | -6.497322240  | -3.439167179 | -3.080391126 |
| H219 | -3.400748428  | -1.925947015 | -0.731974885 |
| H220 | 1.478052226   | -6.894297227 | -5.996881552 |
| H221 | -2.378965508  | -3.961133465 | -0.431866050 |
| H222 | -3.780322491  | 3.716866905  | 1.803631230  |
| H223 | -3.029651528  | 1.320228800  | 1.008689035  |
| H224 | -8.356909829  | 2.210231381  | 2.083018999  |
| H225 | -7.141576973  | 0.854015434  | -0.282808760 |
| H226 | -6.417883648  | 5.073585085  | -0.086282268 |
| H227 | -7.793807034  | 10.156909274 | 0.394149192  |
| H228 | -7.012620312  | 7.000342865  | 2.438994301  |
| H229 | -8.484982495  | 6.725073053  | 0.112912379  |
| H230 | -5.608928525  | 7.792722974  | -0.188933111 |
| H231 | -9.405273027  | 10.167228995 | -3.523000313 |
| H232 | -2.688805177  | 4.754908211  | -0.148072760 |
| H233 | -4.098400013  | 4.454802376  | -1.170100270 |
| H234 | -8.799127934  | 11.571039578 | -1.475044642 |
| H235 | -7.536207670  | 6.490516569  | -1.354713166 |
| H236 | -5.467992878  | 2.426531574  | -0.004253770 |
| H237 | -7.178854290  | 0.894885242  | 2.158762253  |
| H238 | -9.504376460  | 2.387882444  | -2.347410621 |
| H239 | -1.551235309  | 0.697239421  | -2.875379614 |
| H240 | -10.001040809 | 0.765234140  | -1.827978760 |
| H241 | 9.717016566   | 2.767231549  | 4.403864774  |
| H242 | 8.292217540   | 2.964185285  | 3.622770895  |
| H243 | 2.612706164   | 5.479493452  | -2.222323123 |
| H244 | -0.071938403  | 5.931638083  | -1.153865569 |
| H245 | 2.764366287   | 8.019491250  | -1.498542000 |
| H246 | -2.479917444  | 3.115023121  | -2.777722065 |
| H247 | -3.842278717  | 3.795281208  | -4.601286565 |
| H248 | -3.574027479  | 5.234591767  | -4.010077778 |
| H249 | -4.272196700  | 0.907386686  | -4.922442891 |
| H250 | -5.982957552  | 0.873084996  | -5.447720716 |
| H251 | 1.693325398   | 11.424416301 | -4.822326207 |
| H252 | 0.423945763   | 12.659340932 | -5.063234858 |
| H253 | 1.098642517   | 9.170289972  | -5.069243791 |
| H254 | -0.575551607  | 8.662597386  | -5.124822556 |
| H255 | -0.741644949  | 7.576455313  | -8.415394513 |
| H256 | -0.711617655  | 3.261763128  | -7.016603464 |
| H257 | -5.852200641  | 8.897132808  | -3.846873416 |
| H258 | -1.951545619  | 8.992728939  | -0.754900790 |
| H259 | -2.725501346  | 7.026370328  | -5.549184006 |
| H260 | 2.505922115   | 3.883387240  | -4.360096432 |
| H261 | 3.931967025   | 5.854506031  | -4.097614271 |
| H262 | 0.002146237   | 3.733161675  | -4.481720903 |
| H263 | -7.849379385  | -0.081741929 | -2.416061606 |
| H264 | 5.552496569   | 8.193496975  | -5.666146228 |
| H265 | -5.555390475  | -1.120299040 | -3.797944563 |
| H266 | 2.575308723   | 4.398361443  | -6.048804585 |
| H267 | -2.202237985  | 7.129664348  | -2.353638977 |
| H268 | -5.950065910  | 3.128681948  | -4.436144411 |
| H269 | 5.027305599   | 9.113022823  | -4.241005343 |
| H270 | -0.203191782  | 5.936536691  | -8.580040977 |
| H271 | -2.567648513  | 7.954942244  | -6.991625935 |

|      |              |               |              |
|------|--------------|---------------|--------------|
| H272 | -4.890892713 | -3.818071079  | -3.337052545 |
| H273 | -5.736059903 | -2.889154107  | -0.968245411 |
| H274 | -5.535191359 | 10.830129823  | -2.325717746 |
| H275 | -4.966429150 | 1.492702894   | -2.618582497 |
| H276 | 1.391406657  | 6.521507493   | -5.494708897 |
| H277 | 0.488939539  | 4.497892970   | -7.395047066 |
| H278 | 0.915573381  | 2.657213124   | -5.520657864 |
| H279 | -1.860473195 | 4.918776576   | -5.532698376 |
| H280 | 1.824876049  | 9.760727131   | 0.606353591  |
| H281 | 0.956746117  | 9.956742204   | -2.608144028 |
| H282 | 1.450038709  | 12.836252054  | -2.842426422 |
| H283 | 3.366028996  | 9.830392129   | -0.278043712 |
| H284 | -1.090274134 | 11.067873475  | -1.455277183 |
| H285 | 5.621931278  | -5.314248797  | -7.490125469 |
| H286 | 5.372557732  | -6.523250322  | -6.216548857 |
| H287 | 7.824666948  | -6.624313577  | -2.024284458 |
| H288 | 5.968811450  | -7.670905539  | -8.202229372 |
| H289 | 4.353636403  | -7.907271935  | -8.054729595 |
| H290 | 6.224911344  | 4.296365319   | -0.689933754 |
| H291 | 6.590217739  | 7.296704017   | -0.049120868 |
| H292 | 6.439691827  | 6.537547991   | -4.275842671 |
| H293 | 4.901134400  | 5.476731440   | -0.436974547 |
| H294 | 7.900373030  | 7.456741665   | -1.013879323 |
| H295 | 6.264981875  | 1.287611234   | -6.057441351 |
| H296 | 7.220741958  | 5.703106928   | -2.429131202 |
| H297 | 3.647051638  | -5.595784061  | 7.152084419  |
| H298 | 5.596887140  | -7.365923701  | 5.582179672  |
| H299 | 4.683566129  | -0.434921746  | -6.306230436 |
| H300 | 4.083131831  | 0.549952906   | 3.563723110  |
| H301 | 1.976376690  | -0.568242238  | -8.578240714 |
| H302 | -0.600759599 | -3.191779177  | -3.883886478 |
| H303 | 1.554419307  | 0.315516595   | -7.109957941 |
| H304 | 3.114878640  | -3.316419391  | 5.874678172  |
| H305 | 3.057171968  | -1.562732717  | -5.947301587 |
| H306 | 3.020671995  | -4.236319008  | 4.370315838  |
| H307 | 3.384015143  | -6.321158527  | 5.548837059  |
| H308 | 5.404337971  | -4.979827136  | 4.693433225  |
| H309 | 5.444424448  | -4.138934334  | 6.255570505  |
| H310 | -4.140536585 | -2.033790162  | -6.838080312 |
| H311 | 3.918180117  | -7.995628188  | 7.986204260  |
| H312 | 2.869545605  | -10.694229521 | 6.979565841  |
| H313 | 0.873187410  | -1.167420571  | -3.826031598 |
| H314 | 3.928770933  | -9.949735728  | 9.596652083  |
| H315 | 2.385435885  | -10.268157645 | 9.148490937  |
| H316 | 4.687407929  | -2.826274598  | 3.377297923  |
| H317 | 0.264381902  | 0.831234011   | -5.086047907 |
| H318 | -2.614945665 | -3.206471144  | -5.348203564 |
| H319 | 6.505190298  | -10.461275357 | 2.328685607  |
| H320 | 6.257795002  | -8.944381447  | -0.780794791 |
| H321 | 5.449496114  | -8.367785438  | 3.040156545  |
| H322 | 5.829860884  | -11.347101144 | 1.262161551  |
| H323 | 6.622533472  | -0.171390260  | -8.652836327 |
| H324 | 5.823243475  | -5.408426889  | 1.951929800  |
| H325 | 1.462202603  | -6.916492487  | 3.051216241  |
| H326 | 4.227930433  | -3.911671038  | -6.292990005 |
| H327 | 1.998104695  | -9.065318422  | 1.844909107  |
| H328 | 3.445508148  | -8.480005396  | -4.729893883 |
| H329 | 2.529482936  | -6.507243816  | -3.412543597 |
| H330 | 4.352278976  | -11.300221072 | 7.727156463  |
| H331 | 4.561093939  | -0.763690307  | 2.523578744  |
| H332 | 7.497779176  | -6.060163472  | 3.540064129  |

|       |              |               |              |
|-------|--------------|---------------|--------------|
| H333  | 6.763602578  | -4.174602877  | 1.908892071  |
| H334  | 7.600130405  | -6.524914968  | 5.882409196  |
| H335  | 3.531238210  | -1.355438951  | 6.437629749  |
| H336  | 1.857123583  | -12.266479205 | -0.307327203 |
| H337  | 2.936678290  | -8.970614053  | -1.069227133 |
| H338  | 4.077485783  | -9.019690517  | 0.287906586  |
| H339  | 1.014357832  | -8.739534021  | 0.389961674  |
| H340  | 2.129430943  | -3.561346904  | -5.163971108 |
| H341  | -1.740147107 | 0.822417607   | -6.608475704 |
| H342  | -3.868621942 | -0.338897768  | -7.315783128 |
| H343  | 1.474228160  | -5.392567349  | 2.100222167  |
| H344  | 7.363180593  | -7.584020634  | 3.827711615  |
| H345  | 5.889973114  | -9.252872474  | 4.243758244  |
| H346  | 3.110539780  | 0.125269406   | 5.668994828  |
| H347  | 5.619001755  | -9.390090955  | -3.708607235 |
| H348  | 6.075838569  | -7.245290963  | -0.323276756 |
| H349  | 1.338720740  | -4.612363943  | -6.377998527 |
| H350  | 5.513930797  | 2.184899754   | -7.396487342 |
| H351  | 6.405521832  | 0.423694768   | 5.389966902  |
| H352  | 6.945218172  | 0.426414388   | 3.693652072  |
| H353  | 9.146318789  | -8.319159313  | -2.960518941 |
| H354  | 8.294153022  | -9.520836767  | -2.247291998 |
| H355  | 9.375269781  | -9.600223496  | 2.183290553  |
| H356  | 7.823788475  | -9.244419194  | 0.543924779  |
| H357  | 11.165824074 | -9.106516719  | 0.174648883  |
| H358  | 9.393565461  | -7.828555086  | 2.352555882  |
| H359  | 9.489066519  | -0.228860183  | 4.472020567  |
| H360  | -1.718610650 | 13.837177380  | 0.050246055  |
| H361  | 8.325825111  | -5.937943526  | 8.744900988  |
| H362  | 8.304069249  | -3.854696887  | 6.917769316  |
| H363  | -3.324148438 | 12.681479098  | -2.254878153 |
| H364  | -2.897948511 | 11.033626017  | 0.312732552  |
| H365  | -4.440942503 | 11.710689182  | -0.241764401 |
| H366  | -5.004953973 | 6.885852700   | -4.538570557 |
| H367  | 2.310621787  | -1.189513605  | 0.292608603  |
| H368  | -0.058004843 | -1.052276387  | -0.030243983 |
| H369  | 1.268864439  | 0.860709629   | -0.728569722 |
| Mo370 | 3.646734052  | -4.966778630  | -0.685028527 |
| N371  | -7.364152411 | -6.408192764  | -0.184704444 |
| N372  | -9.350554337 | -3.368627390  | 0.699245894  |
| N373  | -9.681111475 | -3.037100981  | 3.495935174  |
| N374  | -7.364076018 | -4.236676701  | 4.526327547  |
| N375  | -5.305673710 | -2.556730272  | 3.426553303  |
| N376  | -5.992137191 | -0.122963296  | 4.739038099  |
| N377  | -5.955904677 | -0.794476045  | 7.565601000  |
| N378  | -3.602234869 | -2.352214178  | 8.130520675  |
| N379  | -1.417716033 | -1.298467481  | 6.761804813  |
| N380  | -1.418581886 | 1.652229729   | 6.332083004  |
| N381  | -2.567719019 | 2.423350978   | 8.899125120  |
| N382  | 3.245725124  | -9.806642558  | 8.849476410  |
| N383  | 4.461672954  | -8.142048956  | 7.128819180  |
| N384  | 4.288026470  | -2.579295538  | 4.288253396  |
| N385  | 3.359819083  | -0.854991979  | 5.572081451  |
| N386  | 4.062129677  | -0.452758817  | 3.390439844  |
| N387  | 7.475698238  | -6.353651145  | 6.904235486  |
| N388  | -5.551831332 | -3.051617092  | -3.115640842 |
| N389  | -1.810690158 | -5.800751248  | -2.034409317 |
| N390  | -5.662928844 | -0.418864280  | -3.048391278 |
| N391  | -8.019969579 | 0.919507282   | -2.472878302 |
| N392  | -7.786626108 | 1.467901116   | 0.232469226  |
| N393  | -5.514578068 | 3.098754051   | 0.760807612  |

|      |              |              |              |
|------|--------------|--------------|--------------|
| N394 | -2.473551590 | 2.446139215  | -1.996281232 |
| N395 | -2.191025834 | 0.571015330  | -0.827960689 |
| N396 | -5.937691570 | 5.799588292  | 0.440372776  |
| N397 | -8.651010321 | 8.508770538  | -2.370572871 |
| N398 | -8.662350186 | 10.565903945 | -1.539902835 |
| N399 | 8.924186226  | 2.256774919  | 4.007941877  |
| N400 | 7.247162603  | 6.767077056  | -0.631449952 |
| N401 | 5.821152105  | 7.219959458  | -3.845309308 |
| N402 | 3.253031049  | 6.448815164  | -4.602594727 |
| N403 | -1.189736652 | 5.154415196  | -6.294832599 |
| N404 | -0.657800492 | 6.646983201  | -8.018333437 |
| N405 | -2.159496869 | 7.264757188  | -6.366579891 |
| N406 | 1.697803947  | 5.977938266  | -2.247325329 |
| N407 | 1.972030578  | 8.486408844  | -1.047762469 |
| N408 | 1.074154865  | 10.896064141 | -2.224746518 |
| N409 | 0.103098936  | 9.408801930  | -4.975391975 |
| N410 | -1.410263826 | 11.993397784 | -1.728428774 |
| N411 | 5.063992506  | -7.197448139 | -8.256906351 |
| N412 | 3.404616855  | -4.463046030 | -6.559893540 |
| N413 | 2.496255716  | -1.545031125 | -6.822282263 |
| N414 | 4.674820301  | 0.309588059  | -7.017251949 |
| N415 | -0.380549006 | -5.216563897 | -9.267357338 |
| N416 | -1.988536927 | -2.969749696 | -8.457640973 |
| N417 | 8.206492810  | -8.582032193 | -2.649901925 |
| N418 | 4.248395435  | -6.800097379 | -2.151369405 |
| N419 | 3.901109295  | -8.088733585 | -3.910552836 |
| N420 | 8.622285985  | -8.611004216 | 0.524844202  |
| O421 | -7.314339640 | -4.054725467 | 1.454284514  |
| O422 | -8.429806715 | -1.137885845 | 3.372841149  |
| O423 | -7.656156496 | -3.069766087 | 6.471906332  |
| O424 | -4.144106770 | -3.000580915 | 5.330780272  |
| O425 | -3.790420249 | 0.438047056  | 4.636293936  |
| O426 | -5.129812095 | 1.313395156  | 7.869651025  |
| O427 | -3.735369322 | -1.647299327 | 10.311822489 |
| O428 | 0.022493867  | -2.767694735 | 7.788000116  |
| O429 | 0.752053874  | 1.305481858  | 6.952193513  |
| O430 | -0.801257564 | 3.844960194  | 9.000343287  |
| O431 | -1.370800978 | 2.698604032  | 12.267488130 |
| O432 | 5.202175377  | -9.862198324 | 5.770227619  |
| O433 | 6.021109466  | -6.346528016 | 8.685113335  |
| O434 | 10.215692592 | -4.122256355 | 7.576054475  |
| O435 | -5.670955145 | -0.312374405 | -0.751781872 |
| O436 | -3.478469164 | -4.995501530 | -3.352942722 |
| O437 | -7.138291937 | 2.927407994  | -3.116807887 |
| O438 | -5.197562105 | 2.747458702  | -4.961955282 |
| O439 | -9.795329726 | 2.587968632  | 0.232383731  |
| O440 | -6.233078954 | 3.410960315  | 2.904997315  |
| O441 | -4.205006704 | 6.253425188  | 1.855494949  |
| O442 | -6.451751947 | 8.918653495  | 2.020732310  |
| O443 | 9.180914291  | -0.213551792 | 6.491586549  |
| O444 | 3.390625744  | 5.454790941  | 3.423469914  |
| O445 | 4.853690982  | 7.949280009  | -1.914507167 |
| O446 | 2.827310385  | 8.537595735  | -5.470092124 |
| O447 | -0.120935286 | 6.533316117  | -3.526040619 |
| O448 | 0.067850077  | 8.123709244  | 0.172419673  |
| O449 | 2.756700064  | 5.974439415  | 0.633180435  |
| O450 | 2.108272797  | 12.134390073 | -0.601277541 |
| O451 | -0.962709120 | 13.831466429 | -3.001518369 |
| O452 | -1.567377778 | 10.968815819 | -4.975459821 |
| O453 | -3.620955779 | 14.452893596 | -0.360285534 |
| O454 | -4.146283709 | 6.827981204  | -4.077145158 |

|  |                         |              |               |              |
|--|-------------------------|--------------|---------------|--------------|
|  | O455                    | 2.619828445  | -6.542332404  | -7.145950844 |
|  | O456                    | 1.001608706  | -2.748700067  | -8.077472972 |
|  | O457                    | 3.471865901  | 1.550013828   | -8.516947669 |
|  | O458                    | 8.007118080  | 1.226577933   | -8.106139546 |
|  | O459                    | -3.766445890 | -4.359689096  | -8.802397314 |
|  | O460                    | -1.077259252 | -7.674744507  | -4.460536188 |
|  | O461                    | 0.974457794  | -7.152443981  | -5.161873971 |
|  | O462                    | -2.358679443 | 0.504160477   | -9.223856976 |
|  | O463                    | 9.719399030  | -6.849741385  | -0.386855194 |
|  | O464                    | 11.925768648 | -8.319542310  | 1.897424220  |
|  | O465                    | -0.798151244 | -5.915275539  | 0.914629703  |
|  | O466                    | -0.804723194 | -7.765270183  | 2.152412937  |
|  | O467                    | 3.924066064  | -11.543125134 | 0.346176501  |
|  | O468                    | 1.795083639  | -11.289141059 | -0.364533999 |
|  | O469                    | 4.545807491  | -6.249405270  | 0.957950008  |
|  | O470                    | 3.975262254  | -7.546160053  | 2.711012048  |
|  | O471                    | 2.186771490  | -6.407137142  | -0.187114834 |
|  | O472                    | 7.869946537  | -6.778235457  | 4.113018795  |
|  | O473                    | 6.485071568  | -4.905933094  | 2.493740059  |
|  | O474                    | -3.123736857 | 4.416380426   | -4.312686303 |
|  | O475                    | 6.685137456  | -11.224446335 | 1.723101494  |
|  | O476                    | 6.219038573  | -8.916685689  | 3.370333263  |
|  | S477                    | 4.561827548  | 4.232302187   | -2.483426431 |
|  | S478                    | 2.556035169  | 1.054998388   | -3.101354822 |
|  | S479                    | 2.271204459  | -4.044658343  | -2.369506193 |
|  | S480                    | 3.536993213  | 1.349292397   | 0.224563518  |
|  | S481                    | 0.507624639  | -1.489599323  | -1.191212958 |
|  | S482                    | 4.799803071  | -2.075311554  | -4.529903177 |
|  | S483                    | 3.147867152  | -3.513793180  | 1.126587358  |
|  | S484                    | 6.132964307  | 0.751332078   | -2.227856455 |
|  | S485                    | 5.823349438  | -4.190286895  | -1.334810759 |
|  | S486                    | 6.142977685  | -1.252352416  | 1.082222910  |
|  | <b>14u(a)</b>           |              |               |              |
|  | Fe( 139)                | 0.557        | 2.410         |              |
|  | Fe( 140)                | 0.326        | -1.629        |              |
|  | Fe( 141)                | 0.557        | 2.792         |              |
|  | Fe( 142)                | 0.530        | -2.488        |              |
|  | Fe( 143)                | 0.554        | 2.861         |              |
|  | Fe( 144)                | 0.504        | -2.070        |              |
|  | Fe( 145)                | 0.463        | 1.846         |              |
|  | S=2                     |              |               |              |
|  | bmlcnx2b262hx47ua.car_3 |              |               |              |
|  | C1                      | -8.286997412 | -4.407660189  | 0.163064428  |
|  | C2                      | -8.464745139 | -5.653159555  | -0.713086909 |
|  | C3                      | -9.236971381 | -2.243174298  | 0.841833407  |
|  | C4                      | -9.129902036 | -2.361461985  | 2.360194556  |
|  | C5                      | -9.615840461 | -3.657711856  | 4.369511770  |
|  | C6                      | -8.191043559 | -3.999673767  | 4.824202603  |
|  | C7                      | -6.025296976 | -4.959485777  | 4.192453340  |
|  | C8                      | -5.136372706 | -3.716354997  | 4.099180799  |
|  | C9                      | -4.607561388 | -1.650129771  | 2.920054864  |
|  | C10                     | -4.852409772 | -0.669390671  | 4.076662571  |
|  | C11                     | -6.429693346 | 0.295470843   | 5.656555620  |
|  | C12                     | -5.920773177 | -0.207731432  | 7.014218408  |
|  | C13                     | -5.874437993 | -2.052157988  | 8.622783986  |
|  | C14                     | -4.455749042 | -2.576814649  | 8.877050141  |
|  | C15                     | -2.495460769 | -3.720748848  | 7.932351223  |
|  | C16                     | -1.303721047 | -2.976485364  | 7.321971204  |
|  | C17                     | -0.585448950 | -1.091743869  | 5.882777494  |
|  | C18                     | -0.493581696 | 0.324829941   | 6.477861349  |
|  | C19                     | -0.781235122 | -1.116605298  | 4.342995889  |
|  | C20                     | 0.186591380  | -0.168763715  | 3.625384594  |
|  | C21                     | -0.647216234 | -2.545805479  | 3.805957319  |
|  | C22                     | -1.660785294 | 2.437766450   | 6.979865139  |
|  | C23                     | -1.841965002 | 2.398584620   | 8.509797330  |
|  | C24                     | -2.729734921 | 3.309865642   | 6.278178926  |
|  | C25                     | -2.852645572 | 4.680910162   | 6.952876186  |
|  | C26                     | -2.403367185 | 3.472766927   | 4.788131703  |
|  | C27                     | -3.132892835 | 1.620878676   | 10.412894812 |



|     |              |               |              |
|-----|--------------|---------------|--------------|
| C28 | -1.909261593 | 1.280759409   | 11.238144410 |
| C29 | 3.669126759  | -10.954264927 | 6.779995094  |
| C30 | 4.482582158  | -9.902907917  | 6.024080670  |
| C31 | 5.078605073  | -7.473018054  | 6.038110442  |
| C32 | 6.156214902  | -7.064482843  | 7.061678597  |
| C33 | 4.058563970  | -6.345652083  | 5.803374662  |
| C34 | 4.679666628  | -5.051110009  | 5.272142413  |
| C35 | 3.599831989  | -4.083273236  | 4.787669317  |
| C36 | 3.789686353  | -1.615485089  | 4.427764216  |
| C37 | 8.509135164  | -6.456251287  | 7.372953207  |
| C38 | 8.974778656  | -5.028655118  | 7.194911309  |
| C39 | -5.100157290 | -2.335521662  | -2.156832919 |
| C40 | -5.432770178 | -0.841570451  | -2.037682003 |
| C41 | -3.602975625 | -2.539506038  | -1.856777175 |
| C42 | -3.188835631 | -3.994588222  | -1.557126716 |
| C43 | -2.779573300 | -4.823182901  | -2.769220642 |
| C44 | -5.602089934 | 1.233587965   | -3.364843483 |
| C45 | -6.956417769 | 1.863890792   | -3.015443892 |
| C46 | -5.140640756 | 1.681120589   | -4.766326417 |
| C47 | -9.128892989 | 1.530068629   | -1.936935279 |
| C48 | -8.938184030 | 1.829042567   | -0.442321339 |
| C49 | -7.513143353 | 1.585244128   | 1.542385086  |
| C50 | -6.442700204 | 2.632740688   | 1.865606794  |
| C51 | -4.455061762 | 3.881839920   | 1.146733074  |
| C52 | -4.935939364 | 5.305521452   | 1.463552947  |
| C53 | -3.527523884 | 4.004786786   | -0.075216369 |
| C54 | -2.924798640 | 2.714673165   | -0.523066032 |
| C55 | -2.679986556 | 1.512338118   | 0.111645134  |
| C56 | -1.907110361 | 1.281432282   | -1.881769966 |
| C57 | -6.467342095 | 7.084589485   | 0.738716714  |
| C58 | -6.736858222 | 7.517038699   | 2.178723187  |
| C59 | -7.768585002 | 7.139615348   | -0.097987751 |
| C60 | -8.211852976 | 8.491429999   | -0.575043771 |
| C61 | -8.274934601 | 9.706777200   | 0.079551145  |
| C62 | -9.015000530 | 9.910999035   | -1.999262542 |
| C63 | 8.100286554  | 1.159265255   | 5.391647502  |
| C64 | 8.908930447  | -0.108842761  | 5.591536734  |
| C65 | 6.714008786  | 0.729337144   | 4.844550235  |
| C66 | 5.783644946  | 1.898738612   | 4.629939610  |
| C67 | 4.980363926  | 2.392169777   | 5.675577493  |
| C68 | 5.691732881  | 2.528816799   | 3.375974734  |
| C69 | 4.112136330  | 3.472135011   | 5.478675393  |
| C70 | 4.836390624  | 3.612198112   | 3.165341940  |
| C71 | 4.043581382  | 4.081010620   | 4.218288386  |
| C72 | 6.470474484  | 6.385888808   | -0.990178779 |
| C73 | 5.611382196  | 7.444880911   | -1.693632269 |
| C74 | 5.593316923  | 5.199836969   | -0.571085554 |
| C75 | 5.074826946  | 8.549334544   | -3.825019310 |
| C76 | 3.629841678  | 8.156761798   | -4.145105268 |
| C77 | 1.948238203  | 6.341877867   | -4.148229386 |
| C78 | 1.082047269  | 6.464257998   | -2.875407375 |
| C79 | 2.041791777  | 4.898915374   | -4.678139436 |
| C80 | 0.730013233  | 4.172551874   | -4.993393892 |
| C81 | -0.069889643 | 4.669107968   | -6.210267433 |
| C82 | -1.235432138 | 6.875463435   | -6.343068010 |
| C83 | 0.917167059  | 6.293143972   | -0.448920808 |
| C84 | 0.866307897  | 7.731005762   | 0.106525551  |
| C85 | 1.433070003  | 5.366658302   | 0.660452894  |
| C86 | 2.153238382  | 9.775548650   | 0.503038376  |
| C87 | 1.699811136  | 11.109327901  | -0.085124117 |
| C88 | 0.604783794  | 12.293724114  | -1.943260128 |

|       |               |               |              |
|-------|---------------|---------------|--------------|
| C89   | -0.750929378  | 12.888666918  | -1.506194955 |
| C90   | 0.655122429   | 12.106071784  | -3.475934154 |
| C91   | -0.369611092  | 11.083785319  | -3.957154424 |
| C92   | -2.885624945  | 12.478867231  | -0.367071951 |
| C93   | -2.879173413  | 13.670974810  | 0.583887248  |
| C94   | -3.624305349  | 11.281096114  | 0.287078950  |
| C95   | -3.808740239  | 10.134839144  | -0.680574524 |
| C96   | -4.886490029  | 10.132328791  | -1.579883787 |
| C97   | -2.882317852  | 9.081102655   | -0.750695683 |
| C98   | -5.030323936  | 9.124915485   | -2.535935969 |
| C99   | -2.996531369  | 8.077114737   | -1.715964432 |
| C100  | -4.069787838  | 8.114150057   | -2.604795061 |
| C101  | 5.277589083   | -5.491845679  | -7.547427431 |
| C102  | 3.834255028   | -5.072711839  | -7.315734063 |
| C103  | 2.363388480   | -3.290742828  | -6.402521820 |
| C104  | 2.052375442   | -2.022303473  | -7.199934795 |
| C105  | 2.536212437   | 0.370022890   | -7.416385494 |
| C106  | 3.756080228   | 1.283165207   | -7.508850169 |
| C107  | 6.024256524   | 1.839665254   | -6.779675575 |
| C108  | 7.107594806   | 1.461043609   | -7.768984450 |
| C109  | -1.271877633  | -4.665898326  | -8.977786651 |
| C110  | -2.226738008  | -3.467977279  | -9.050048498 |
| C111  | -1.137418478  | -5.140356182  | -7.510827244 |
| C112  | -0.521373320  | -6.550300315  | -7.434635927 |
| C113  | -0.102219471  | -6.880458603  | -6.019721846 |
| C114  | -2.520260871  | -1.054245773  | -8.743368930 |
| C115  | -1.802999214  | 0.086693002   | -9.436620365 |
| C116  | -3.097780234  | -0.710838001  | -7.347534223 |
| C117  | -2.062909584  | -0.727514203  | -6.249283338 |
| C118  | -1.269188753  | 0.397485389   | -5.970475519 |
| C119  | -1.836618311  | -1.905487142  | -5.513669276 |
| C120  | -0.263933289  | 0.331226511   | -4.998317481 |
| C121  | -0.830388469  | -1.971105642  | -4.543981254 |
| C122  | -0.033771883  | -0.851227696  | -4.287479039 |
| C123  | 7.931026695   | -7.374430909  | -2.027495353 |
| C124  | 8.882122500   | -7.460421136  | -0.823120404 |
| C125  | 6.478138087   | -7.700416268  | -1.648203600 |
| C126  | 5.453243969   | -7.482524549  | -2.717865779 |
| C127  | 5.281293005   | -8.218922044  | -3.873232988 |
| C128  | 3.645133786   | -6.738075635  | -3.690726695 |
| C129  | 9.628939812   | -8.630268570  | 1.172450351  |
| C130  | 11.080526898  | -8.611495474  | 0.747051389  |
| C131  | -0.141957402  | -6.896000506  | 1.078726219  |
| C132  | 1.277295182   | -6.600517254  | 1.488391286  |
| C133  | 2.340840860   | -7.117012574  | 0.442648452  |
| C134  | 2.100384805   | -8.627875910  | 0.159554769  |
| C135  | 3.187229766   | -9.238220721  | -0.740238963 |
| C136  | 3.136616153   | -10.736765673 | -0.820867319 |
| C137  | 3.735076555   | -7.007721509  | 1.132933997  |
| C138  | 3.971939623   | -1.315554220  | -1.406949439 |
| Fe139 | 4.409254544   | -2.756036282  | -2.675048093 |
| Fe140 | 2.756083543   | 0.225148279   | -1.230230962 |
| Fe141 | 5.151163139   | -0.038546200  | -0.346140361 |
| Fe142 | 4.675784748   | -0.185941983  | -2.906257189 |
| Fe143 | 4.415672143   | 2.212733945   | -1.790807856 |
| Fe144 | 4.825981151   | -2.557641951  | -0.130795629 |
| Fe145 | 2.355249386   | -2.438960499  | -0.949947523 |
| H146  | -6.805853863  | -6.637987365  | -0.058365543 |
| H147  | -6.596228244  | -5.903986404  | -1.501141798 |
| H148  | -10.060814466 | -3.646538346  | -0.543489781 |
| H149  | -8.908199527  | -5.355411517  | -1.676146144 |

|      |               |              |               |
|------|---------------|--------------|---------------|
| H150 | -9.221465078  | -6.282416254 | -0.212457473  |
| H151 | -8.360085185  | -1.665397224 | 0.515337396   |
| H152 | -10.228725885 | -4.096944329 | 2.352835544   |
| H153 | -10.137031659 | -1.661963452 | 0.599987207   |
| H154 | -10.282057325 | -4.485046662 | 4.648453085   |
| H155 | -7.764258038  | -4.782148483 | 2.974286107   |
| H156 | -9.921755621  | -2.764807778 | 4.929548612   |
| H157 | -3.528421306  | -1.850709848 | 2.898566285   |
| H158 | -6.024653718  | -3.157961855 | 2.317871274   |
| H159 | -5.682565835  | -5.712748426 | 3.470155193   |
| H160 | -5.979067578  | 1.282196210  | 5.488975776   |
| H161 | -6.880371903  | -1.097358941 | 4.079152899   |
| H162 | -5.905449914  | -5.366396458 | 5.203513520   |
| H163 | -4.886546303  | -1.175348776 | 1.967773671   |
| H164 | -6.681995675  | -2.100097920 | 6.647551592   |
| H165 | -7.520561495  | 0.415350461  | 5.711642553   |
| H166 | -1.381776144  | -3.221389635 | 4.267773477   |
| H167 | -0.801252687  | -2.559027531 | 2.716190813   |
| H168 | 0.360886251   | -2.946209904 | 3.997681421   |
| H169 | -1.806277184  | -0.764547291 | 4.143765898   |
| H170 | -6.569782308  | -2.884036722 | 8.808003700   |
| H171 | -2.378428952  | 2.508240850  | 4.260843697   |
| H172 | -3.533183959  | 1.187132936  | 8.366393938   |
| H173 | -3.157563535  | 4.602404503  | 8.006413439   |
| H174 | -0.007605008  | -0.182488798 | 2.542565562   |
| H175 | 1.232232482   | -0.478705438 | 3.765126426   |
| H176 | 7.948691695   | 1.621684033  | 6.385701364   |
| H177 | -3.162405482  | 4.106033499  | 4.305347440   |
| H178 | -3.601604999  | 5.291393127  | 6.427609524   |
| H179 | -1.423722878  | 3.960961729  | 4.656376263   |
| H180 | -1.891147852  | 5.217538077  | 6.919128750   |
| H181 | -3.702116306  | 2.791408581  | 6.368478713   |
| H182 | -0.671636421  | 2.894946408  | 6.828240541   |
| H183 | -2.431131828  | 0.755428244  | 5.882131366   |
| H184 | 0.086562590   | 0.871234312  | 3.971988396   |
| H185 | 1.583840123   | 4.355566077  | 0.241784621   |
| H186 | 0.650599636   | 5.316895698  | 1.434768293   |
| H187 | 2.743497231   | 5.560517957  | 2.115495022   |
| H188 | 2.654009736   | 5.332300712  | 4.738765771   |
| H189 | 4.757988900   | 4.074320889  | 2.180473462   |
| H190 | 6.274723669   | 2.147884860  | 2.534333436   |
| H191 | 5.017777845   | 1.918515039  | 6.660501165   |
| H192 | -2.582165007  | -1.660707340 | 6.428431099   |
| H193 | -2.518368070  | -4.717726591 | 7.466536033   |
| H194 | -2.282373526  | -3.852123433 | 9.000921275   |
| H195 | -4.273277309  | -3.179158674 | 6.898743761   |
| H196 | -6.057029907  | -1.278123288 | 9.378926760   |
| H197 | 3.482291932   | 3.829711092  | 6.298888454   |
| H198 | 0.373572949   | -1.564924931 | 6.131032573   |
| H199 | -3.553838631  | 2.576052284  | 10.768223464  |
| H200 | -3.878026264  | 0.831704403  | 10.602588046  |
| H201 | -1.150509121  | 0.650153483  | 10.719804193  |
| H202 | 9.356236571   | -7.139130732 | 7.205644411   |
| H203 | -1.378829509  | -6.191975028 | -3.377040479  |
| H204 | -0.060850735  | -8.443382455 | 2.230991224   |
| H205 | -1.268180693  | -7.290301586 | -7.756356370  |
| H206 | 0.346268051   | -6.616986112 | -8.107661536  |
| H207 | -2.122917360  | -5.152545235 | -7.020096813  |
| H208 | -1.080180007  | -0.240085397 | -10.221835142 |
| H209 | -1.797504691  | -5.455181308 | -9.535142782  |
| H210 | -3.016056079  | -2.144777980 | -2.699963288  |

|      |              |              |              |
|------|--------------|--------------|--------------|
| H211 | -4.016242523 | -4.533332616 | -1.061053920 |
| H212 | -0.709533033 | -2.171842828 | -8.483504657 |
| H213 | -3.377603335 | -1.279466656 | -9.408144326 |
| H214 | 0.591923829  | -3.771732723 | -9.144483378 |
| H215 | -1.159375849 | -5.596491562 | -1.733609551 |
| H216 | -0.520132692 | -4.413173478 | -6.960495084 |
| H217 | 0.499620682  | -5.268356236 | -9.817002820 |
| H218 | -6.402663578 | -3.203741198 | -3.507219821 |
| H219 | -3.335281990 | -1.918945894 | -0.990243558 |
| H220 | 1.726438760  | -6.338142433 | -6.505775740 |
| H221 | -2.350926450 | -3.974293656 | -0.846774162 |
| H222 | -3.893002196 | 3.534477568  | 2.025820111  |
| H223 | -2.929477850 | 1.235172937  | 1.133885799  |
| H224 | -8.437803648 | 1.919428011  | 2.029420181  |
| H225 | -7.128398338 | 0.797747853  | -0.409021275 |
| H226 | -6.489350634 | 5.017842538  | 0.160768358  |
| H227 | -7.990466718 | 10.013506294 | 1.079358122  |
| H228 | -7.116662590 | 6.691185112  | 2.827188149  |
| H229 | -8.574502425 | 6.639779907  | 0.468340534  |
| H230 | -5.706003659 | 7.751012071  | 0.302083959  |
| H231 | -9.423146441 | 10.381702094 | -2.889713105 |
| H232 | -2.739253580 | 4.726932549  | 0.196150200  |
| H233 | -4.094022175 | 4.461984726  | -0.903808126 |
| H234 | -8.946975278 | 11.587287236 | -0.688051029 |
| H235 | -7.603064045 | 6.531242314  | -1.000842158 |
| H236 | -5.484036171 | 2.359147966  | 0.059874153  |
| H237 | -7.215777269 | 0.640828023  | 2.022956211  |
| H238 | -9.456410829 | 2.465604381  | -2.408235548 |
| H239 | -1.438283853 | 0.891656347  | -2.781209983 |
| H240 | -9.941310926 | 0.798667296  | -2.043610185 |
| H241 | 9.586172186  | 2.478285507  | 4.880520715  |
| H242 | 8.168154772  | 2.758197112  | 4.113192570  |
| H243 | 2.601681743  | 5.697150386  | -1.674718210 |
| H244 | -0.125889745 | 6.016486599  | -0.662664937 |
| H245 | 2.688017448  | 8.155041722  | -0.736187388 |
| H246 | -2.447103086 | 3.263753564  | -2.541327440 |
| H247 | -3.789461752 | 4.137173252  | -4.358574704 |
| H248 | -3.552919628 | 5.521913622  | -3.630028906 |
| H249 | -4.125823409 | 1.300399992  | -4.945753222 |
| H250 | -5.815173905 | 1.256908869  | -5.530142821 |
| H251 | 1.679786524  | 11.818986121 | -3.755295069 |
| H252 | 0.420773078  | 13.074329725 | -3.937304907 |
| H253 | 1.101090619  | 9.591419908  | -4.189801636 |
| H254 | -0.565122516 | 9.086554961  | -4.353479634 |
| H255 | -0.597779807 | 8.275252517  | -7.696073459 |
| H256 | -0.569955161 | 3.818943361  | -6.697450914 |
| H257 | -5.884063826 | 9.128449346  | -3.218039191 |
| H258 | -2.051012074 | 9.022654953  | -0.042452148 |
| H259 | -2.691300889 | 7.434643086  | -4.992584891 |
| H260 | 2.584772792  | 4.284825394  | -3.941632713 |
| H261 | 3.981818551  | 6.231828890  | -3.504968126 |
| H262 | 0.073350479  | 4.142700993  | -4.109802740 |
| H263 | -7.760568232 | 0.035289332  | -2.647520878 |
| H264 | 5.595097190  | 8.705602425  | -4.779981348 |
| H265 | -5.441756782 | -0.850948243 | -4.037164748 |
| H266 | 2.669128062  | 4.924504505  | -5.584932597 |
| H267 | -2.237647460 | 7.297712684  | -1.799036151 |
| H268 | -5.881200527 | 3.429814722  | -4.340618509 |
| H269 | 5.025376978  | 9.517455568  | -3.306764579 |
| H270 | -0.038957468 | 6.671948561  | -8.004942789 |
| H271 | -2.452643208 | 8.516796441  | -6.317611910 |

|      |              |               |              |
|------|--------------|---------------|--------------|
| H272 | -4.798323121 | -3.591140595  | -3.757614205 |
| H273 | -5.675225768 | -2.823942123  | -1.347572856 |
| H274 | -5.631323284 | 10.930072734  | -1.536549283 |
| H275 | -4.906089676 | 1.668517862   | -2.626219710 |
| H276 | 1.458920411  | 6.987425836   | -4.890090731 |
| H277 | 0.610670993  | 5.103660205   | -6.953446452 |
| H278 | 1.009874754  | 3.128398536   | -5.193243526 |
| H279 | -1.808027164 | 5.337233403   | -5.149881967 |
| H280 | 1.676639053  | 9.692567048   | 1.491583587  |
| H281 | 0.867858353  | 10.164738203  | -1.707650841 |
| H282 | 1.348370253  | 13.056354774  | -1.669253989 |
| H283 | 3.238030555  | 9.852125991   | 0.658176745  |
| H284 | -1.197008111 | 11.162385690  | -0.512105066 |
| H285 | 5.901591129  | -4.604036993  | -7.725108957 |
| H286 | 5.616318095  | -5.932772774  | -6.586696822 |
| H287 | 7.983454754  | -6.329851771  | -2.366733648 |
| H288 | 6.282111449  | -6.863257708  | -8.670297045 |
| H289 | 4.670191557  | -7.139016703  | -8.570551851 |
| H290 | 6.235519344  | 4.426037130   | -0.131457238 |
| H291 | 6.456757388  | 7.377858932   | 0.793559020  |
| H292 | 6.496968297  | 6.989770985   | -3.492683815 |
| H293 | 4.857419971  | 5.532119546   | 0.175753411  |
| H294 | 7.801449658  | 7.662907076   | -0.093953137 |
| H295 | 6.456635786  | 1.845940391   | -5.767589418 |
| H296 | 7.242821701  | 6.026925489   | -1.687703457 |
| H297 | 3.520960909  | -6.155001171  | 6.747076815  |
| H298 | 5.549528821  | -7.740985525  | 5.084614277  |
| H299 | 4.888753433  | 0.148029497   | -6.175094747 |
| H300 | 4.001192350  | 0.302349293   | 3.782429518  |
| H301 | 2.182837622  | 0.192697887   | -8.440791286 |
| H302 | -0.669001597 | -2.882650536  | -3.964458559 |
| H303 | 1.749673519  | 0.956009563   | -6.911019302 |
| H304 | 2.939479144  | -3.785624697  | 5.612831438  |
| H305 | 3.248638840  | -1.007220317  | -5.895474214 |
| H306 | 2.965708595  | -4.579942167  | 4.033914794  |
| H307 | 3.324289874  | -6.728659641  | 5.077045172  |
| H308 | 5.348876268  | -5.268110422  | 4.425392329  |
| H309 | 5.287574506  | -4.559461587  | 6.049073549  |
| H310 | -3.879924083 | -1.452894823  | -7.129994232 |
| H311 | 3.847411172  | -8.601556288  | 7.399721216  |
| H312 | 2.818310916  | -11.209683912 | 6.129361760  |
| H313 | 0.740911947  | -0.889711350  | -3.519096470 |
| H314 | 3.830896778  | -10.700554728 | 8.818036359  |
| H315 | 2.296386121  | -10.971867717 | 8.313501237  |
| H316 | 4.603232546  | -3.023061671  | 3.249142377  |
| H317 | 0.350979570  | 1.204829318   | -4.775406542 |
| H318 | -2.468378007 | -2.779077023  | -5.690815702 |
| H319 | 6.563219489  | -10.537792808 | 1.599948444  |
| H320 | 6.424286557  | -8.759606754  | -1.341090314 |
| H321 | 5.470417771  | -8.527774231  | 2.455689750  |
| H322 | 5.921837821  | -11.331852825 | 0.442734848  |
| H323 | 6.841724587  | 0.639713417   | -8.478591289 |
| H324 | 5.818815043  | -5.477286777  | 1.648408999  |
| H325 | 1.497444102  | -7.037820417  | 2.474206767  |
| H326 | 4.474644537  | -3.321892324  | -6.457813442 |
| H327 | 2.082980467  | -9.160333795  | 1.123405037  |
| H328 | 3.707226195  | -8.078340282  | -5.323819690 |
| H329 | 2.736829188  | -6.194065713  | -3.917654901 |
| H330 | 4.303848814  | -11.855248926 | 6.835159275  |
| H331 | 4.478618441  | -0.900573092  | 2.621657831  |
| H332 | 7.472451802  | -6.250624297  | 3.209271705  |

|       |              |               |              |
|-------|--------------|---------------|--------------|
| H333  | 6.734753020  | -4.228272861  | 1.745927245  |
| H334  | 7.529608685  | -6.892261191  | 5.504944586  |
| H335  | 3.313305453  | -1.911892481  | 6.413382023  |
| H336  | 2.010219735  | -12.182582880 | -1.288444748 |
| H337  | 3.078569127  | -8.824974093  | -1.753929660 |
| H338  | 4.187689712  | -8.980644395  | -0.377482326 |
| H339  | 1.119047267  | -8.750150574  | -0.321906341 |
| H340  | 2.366228067  | -3.086791569  | -5.320218574 |
| H341  | -1.435836697 | 1.323986831   | -6.526161537 |
| H342  | -3.578015143 | 0.276844620   | -7.428683686 |
| H343  | 1.399737730  | -5.510021034  | 1.538381801  |
| H344  | 7.350372553  | -7.794057032  | 3.368606801  |
| H345  | 5.882629239  | -9.505894989  | 3.591477589  |
| H346  | 2.872881655  | -0.361868864  | 5.787238163  |
| H347  | 5.860249553  | -9.030021748  | -4.299054985 |
| H348  | 6.196351316  | -7.100403820  | -0.774373597 |
| H349  | 1.591801127  | -4.029632771  | -6.626798579 |
| H350  | 5.698919859  | 2.865991570   | -7.012334795 |
| H351  | 6.276862614  | 0.026501514   | 5.569474148  |
| H352  | 6.864082882  | 0.190176192   | 3.895704582  |
| H353  | 9.354867488  | -7.933986533  | -3.398070449 |
| H354  | 8.498490311  | -9.195461955  | -2.804859177 |
| H355  | 9.441541756  | -9.610013910  | 1.640119597  |
| H356  | 7.949066034  | -9.158352795  | -0.027615717 |
| H357  | 11.268101844 | -8.972922841  | -0.292223090 |
| H358  | 9.450562105  | -7.855278185  | 1.934511912  |
| H359  | 9.372106914  | -0.503393361  | 4.654431170  |
| H360  | -1.918368299 | 13.841398266  | 1.124743805  |
| H361  | 8.189513053  | -6.565881740  | 8.424584451  |
| H362  | 8.192332177  | -4.311127523  | 6.848724163  |
| H363  | -3.438219444 | 12.786966029  | -1.269826632 |
| H364  | -3.060844096 | 10.951666930  | 1.174071042  |
| H365  | -4.598617646 | 11.653317847  | 0.635473679  |
| H366  | -4.984090937 | 7.195559497   | -4.061625868 |
| H367  | 1.705382722  | -0.869628538  | -0.687307530 |
| H368  | -0.361900468 | -1.385915566  | -0.632386883 |
| H369  | 1.308199821  | 0.690464723   | -1.101709485 |
| Mo370 | 3.718895013  | -4.860664027  | -1.042307768 |
| N371  | -7.268726777 | -6.442540678  | -0.949813273 |
| N372  | -9.315791521 | -3.515273685  | 0.136525532  |
| N373  | -9.733351896 | -3.429622612  | 2.938646313  |
| N374  | -7.430309245 | -4.682427764  | 3.933111125  |
| N375  | -5.362125073 | -2.889884404  | 3.047067799  |
| N376  | -6.123192351 | -0.591492537  | 4.545199988  |
| N377  | -6.153640149 | -1.515303971  | 7.300024954  |
| N378  | -3.795209424 | -3.085765853  | 7.800869014  |
| N379  | -1.599413152 | -1.879429909  | 6.577274608  |
| N380  | -1.621325757 | 1.089390372   | 6.409536342  |
| N381  | -2.852448868 | 1.628663280   | 8.988515187  |
| N382  | 3.162359114  | -10.486800491 | 8.074899567  |
| N383  | 4.396650861  | -8.661269805  | 6.535479749  |
| N384  | 4.163501097  | -2.878209863  | 4.163347325  |
| N385  | 3.220533709  | -1.299697377  | 5.610580673  |
| N386  | 3.942803340  | -0.670854052  | 3.490177018  |
| N387  | 7.378653640  | -6.805696291  | 6.534300084  |
| N388  | -5.451345219 | -2.828919301  | -3.496621247 |
| N389  | -1.703851814 | -5.615797298  | -2.596815115 |
| N390  | -5.551336843 | -0.208614567  | -3.236269789 |
| N391  | -7.945071924 | 1.035335510   | -2.615737802 |
| N392  | -7.800791381 | 1.352366761   | 0.136964146  |
| N393  | -5.571505432 | 2.975925359   | 0.867479585  |

|      |              |               |              |
|------|--------------|---------------|--------------|
| N394 | -2.427839004 | 2.547327182   | -1.805222919 |
| N395 | -2.051481436 | 0.628599100   | -0.737838341 |
| N396 | -6.012879096 | 5.704619338   | 0.741163546  |
| N397 | -8.678142444 | 8.633085931   | -1.872365287 |
| N398 | -8.784246999 | 10.596311862  | -0.843703738 |
| N399 | 8.796953029  | 2.013132824   | 4.425598760  |
| N400 | 7.154260409  | 6.924148228   | 0.194960598  |
| N401 | 5.832255454  | 7.603561061   | -3.029487888 |
| N402 | 3.300258757  | 6.862100974   | -3.957006165 |
| N403 | -1.109596884 | 5.644833446   | -5.858914544 |
| N404 | -0.470779671 | 7.325627303   | -7.360912335 |
| N405 | -2.090724209 | 7.748443196   | -5.758581069 |
| N406 | 1.677466825  | 6.167686410   | -1.688643908 |
| N407 | 1.878918727  | 8.569116058   | -0.263627823 |
| N408 | 0.972765740  | 11.067264888  | -1.241163892 |
| N409 | 0.101901889  | 9.820485167   | -4.117698008 |
| N410 | -1.531425765 | 12.097273544  | -0.730549560 |
| N411 | 5.370230077  | -6.401433609  | -8.692674115 |
| N412 | 3.656432500  | -3.849104040  | -6.781309502 |
| N413 | 2.701952665  | -0.919299751  | -6.771777850 |
| N414 | 4.875017830  | 0.954584947   | -6.813717833 |
| N415 | -0.015861401 | -4.394685161  | -9.690945424 |
| N416 | -1.691549380 | -2.247996225  | -8.769136540 |
| N417 | 8.410299859  | -8.228302420  | -3.133173114 |
| N418 | 4.419710596  | -6.552968409  | -2.624379209 |
| N419 | 4.138020893  | -7.733198712  | -4.470028865 |
| N420 | 8.731336455  | -8.507594025  | 0.035846853  |
| O421 | -7.295611395 | -4.241264186  | 0.897669840  |
| O422 | -8.522715778 | -1.501839954  | 3.018433324  |
| O423 | -7.795385380 | -3.686105325  | 5.960087412  |
| O424 | -4.268757044 | -3.471907039  | 4.952482226  |
| O425 | -3.931330917 | 0.022063785   | 4.542014052  |
| O426 | -5.367434646 | 0.565999314   | 7.814363402  |
| O427 | -3.995788851 | -2.560570158  | 10.027864915 |
| O428 | -0.156347837 | -3.406942575  | 7.510325727  |
| O429 | 0.557983255  | 0.730853770   | 6.998123277  |
| O430 | -1.102828981 | 3.044818795   | 9.270953554  |
| O431 | -1.782692941 | 1.601131864   | 12.411669840 |
| O432 | 5.128932465  | -10.241764366 | 5.009742771  |
| O433 | 5.886618254  | -6.990067309  | 8.273669782  |
| O434 | 10.116623955 | -4.663079630  | 7.426263355  |
| O435 | -5.589086623 | -0.263644867  | -0.941984714 |
| O436 | -3.414624793 | -4.798359592  | -3.850106482 |
| O437 | -7.084994743 | 3.106808124   | -3.055463883 |
| O438 | -5.106443843 | 3.110682243   | -4.874944805 |
| O439 | -9.814322172 | 2.460655969   | 0.162922767  |
| O440 | -6.393035741 | 3.138419436   | 2.991217664  |
| O441 | -4.318298707 | 6.055894763   | 2.227483493  |
| O442 | -6.616025236 | 8.657098653   | 2.595816852  |
| O443 | 9.043796523  | -0.683874987  | 6.662604932  |
| O444 | 3.203948136  | 5.145827114   | 3.955514996  |
| O445 | 4.770345722  | 8.132414398   | -1.085516957 |
| O446 | 2.854922874  | 9.028536892   | -4.591428188 |
| O447 | -0.099938357 | 6.836216146   | -2.967291567 |
| O448 | -0.044151507 | 8.064815745   | 0.878059001  |
| O449 | 2.650550581  | 5.891708202   | 1.198862509  |
| O450 | 1.981117091  | 12.165087219  | 0.497123158  |
| O451 | -1.080628497 | 14.032678626  | -1.849742313 |
| O452 | -1.565460332 | 11.384210777  | -4.104156240 |
| O453 | -3.861560863 | 14.369252705  | 0.777550373  |
| O454 | -4.135135117 | 7.113846592   | -3.585936885 |

|  |                        |              |               |              |
|--|------------------------|--------------|---------------|--------------|
|  | O455                   | 2.894436215  | -5.862531959  | -7.589295098 |
|  | O456                   | 1.270962299  | -2.031444757  | -8.176124589 |
|  | O457                   | 3.661926678  | 2.313202189   | -8.198334849 |
|  | O458                   | 8.201105054  | 2.003274605   | -7.802371383 |
|  | O459                   | -3.429074025 | -3.619033268  | -9.328979169 |
|  | O460                   | -0.876537411 | -7.278638859  | -5.155838157 |
|  | O461                   | 1.195899846  | -6.675113775  | -5.717792605 |
|  | O462                   | -2.006621708 | 1.272089020   | -9.218177705 |
|  | O463                   | 9.821096082  | -6.655535382  | -0.676356864 |
|  | O464                   | 12.002185944 | -8.305375328  | 1.490704471  |
|  | O465                   | -0.817832275 | -6.243503373  | 0.301397470  |
|  | O466                   | -0.708483399 | -8.023864307  | 1.632774605  |
|  | O467                   | 4.053617809  | -11.500730395 | -0.523663071 |
|  | O468                   | 1.943709795  | -11.203895807 | -1.274654022 |
|  | O469                   | 4.584241384  | -6.229918768  | 0.548754564  |
|  | O470                   | 3.983839487  | -7.690778961  | 2.155383870  |
|  | O471                   | 2.283926203  | -6.367273916  | -0.715511269 |
|  | O472                   | 7.840493074  | -7.009227244  | 3.731579714  |
|  | O473                   | 6.461719798  | -5.019355238  | 2.250338186  |
|  | O474                   | -3.085569528 | 4.736802694   | -3.992107564 |
|  | O475                   | 6.762500942  | -11.247765106 | 0.938334148  |
|  | O476                   | 6.236576559  | -9.093658885  | 2.760136775  |
|  | S477                   | 4.652791520  | 4.481073266   | -1.995839756 |
|  | S478                   | 2.957538269  | 1.281467291   | -3.197570410 |
|  | S479                   | 2.444550073  | -3.834246556  | -2.751375138 |
|  | S480                   | 3.630435867  | 1.553784348   | 0.267313986  |
|  | S481                   | 0.093147751  | -2.661740188  | -0.764538179 |
|  | S482                   | 5.073003502  | -1.678159725  | -4.532037397 |
|  | S483                   | 3.080036116  | -3.531958915  | 0.851332422  |
|  | S484                   | 6.343991891  | 0.999043007   | -2.003677281 |
|  | S485                   | 5.905490633  | -3.975258017  | -1.476370587 |
|  | S486                   | 6.108052148  | -1.339815717  | 1.201961948  |
|  | <b>14u(b)</b>          |              |               |              |
|  | Fe( 139)               | 0.560        | -2.421        |              |
|  | Fe( 140)               | 0.347        | 1.561         |              |
|  | Fe( 141)               | 0.526        | -2.547        |              |
|  | Fe( 142)               | 0.562        | 2.727         |              |
|  | Fe( 143)               | 0.581        | 3.109         |              |
|  | Fe( 144)               | 0.519        | 2.393         |              |
|  | Fe( 145)               | 0.405        | -1.203        |              |
|  | <b>S=2</b>             |              |               |              |
|  | bmlcnx2b262hx35u.car_2 |              |               |              |
|  | C1                     | -8.299198205 | -4.410885671  | 0.163248312  |
|  | C2                     | -8.472221142 | -5.651828076  | -0.719527236 |
|  | C3                     | -9.249412564 | -2.248753860  | 0.845989207  |
|  | C4                     | -9.132022224 | -2.366223734  | 2.364357333  |
|  | C5                     | -9.608255246 | -3.658832824  | 4.379023789  |
|  | C6                     | -8.183008951 | -4.000478120  | 4.827734098  |
|  | C7                     | -6.021453335 | -4.963718488  | 4.190601704  |
|  | C8                     | -5.132111132 | -3.719658500  | 4.095286833  |
|  | C9                     | -4.607167832 | -1.653307248  | 2.912739922  |
|  | C10                    | -4.848203523 | -0.670245615  | 4.067438468  |
|  | C11                    | -6.419249817 | 0.303092489   | 5.647785660  |
|  | C12                    | -5.909715595 | -0.197095030  | 7.006952251  |
|  | C13                    | -5.868127632 | -2.038015583  | 8.619054169  |
|  | C14                    | -4.454176671 | -2.575903985  | 8.874005287  |
|  | C15                    | -2.499361838 | -3.731070808  | 7.929327429  |
|  | C16                    | -1.303809849 | -2.986743276  | 7.329151634  |
|  | C17                    | -0.581332830 | -1.090857763  | 5.902724880  |
|  | C18                    | -0.492699767 | 0.324973474   | 6.500936874  |
|  | C19                    | -0.778365502 | -1.115723282  | 4.362303976  |
|  | C20                    | 0.187908100  | -0.168789112  | 3.642631253  |
|  | C21                    | -0.645049656 | -2.546346476  | 3.827109954  |
|  | C22                    | -1.654436613 | 2.440997856   | 6.994901058  |
|  | C23                    | -1.835065236 | 2.404692157   | 8.526301285  |
|  | C24                    | -2.720467884 | 3.315838392   | 6.292545786  |
|  | C25                    | -2.841446484 | 4.687537382   | 6.966970930  |
|  | C26                    | -2.391183407 | 3.478568703   | 4.803435471  |
|  | C27                    | -3.122914514 | 1.632201630   | 10.433159055 |



|     |              |               |              |
|-----|--------------|---------------|--------------|
| C28 | -1.894931174 | 1.297640324   | 11.254670785 |
| C29 | 3.659201546  | -10.965342903 | 6.777295342  |
| C30 | 4.479690450  | -9.914340740  | 6.029892303  |
| C31 | 5.068457974  | -7.486325632  | 6.044369440  |
| C32 | 6.142802659  | -7.079726378  | 7.070029735  |
| C33 | 4.055050050  | -6.351033954  | 5.808495232  |
| C34 | 4.686707365  | -5.063428661  | 5.273787671  |
| C35 | 3.617720388  | -4.078702445  | 4.807247950  |
| C36 | 3.825170914  | -1.620490993  | 4.396779243  |
| C37 | 8.491179343  | -6.461269711  | 7.383441719  |
| C38 | 8.950798657  | -5.030572889  | 7.205331722  |
| C39 | -5.109383975 | -2.339176358  | -2.171559741 |
| C40 | -5.459166644 | -0.849001436  | -2.046438320 |
| C41 | -3.609360319 | -2.522610217  | -1.867387882 |
| C42 | -3.176023761 | -3.969413561  | -1.558058129 |
| C43 | -2.758820901 | -4.803429498  | -2.764264675 |
| C44 | -5.617220881 | 1.235025273   | -3.359837620 |
| C45 | -6.970644608 | 1.868506680   | -3.014426393 |
| C46 | -5.146910595 | 1.686329726   | -4.756417931 |
| C47 | -9.142806795 | 1.535977208   | -1.935171707 |
| C48 | -8.949406637 | 1.829430789   | -0.438591070 |
| C49 | -7.519265042 | 1.580546167   | 1.541378474  |
| C50 | -6.440000333 | 2.618784201   | 1.864927209  |
| C51 | -4.459507230 | 3.875923413   | 1.132573877  |
| C52 | -4.942789797 | 5.295267284   | 1.464218391  |
| C53 | -3.548674768 | 4.009015852   | -0.101415514 |
| C54 | -2.966301174 | 2.717954821   | -0.575000855 |
| C55 | -2.766195078 | 1.494306617   | 0.033837899  |
| C56 | -1.952183241 | 1.290999244   | -1.945322473 |
| C57 | -6.493082474 | 7.066648026   | 0.750063946  |
| C58 | -6.786847548 | 7.490423188   | 2.188363302  |
| C59 | -7.781878428 | 7.116871458   | -0.105114923 |
| C60 | -8.217546572 | 8.467635406   | -0.589794837 |
| C61 | -8.255182503 | 9.689902431   | 0.053121519  |
| C62 | -9.021344761 | 9.882431577   | -2.017694666 |
| C63 | 8.081716603  | 1.164991780   | 5.403776841  |
| C64 | 8.881760923  | -0.106490283  | 5.612848537  |
| C65 | 6.692391905  | 0.741330912   | 4.862390771  |
| C66 | 5.766502022  | 1.916607045   | 4.648899413  |
| C67 | 4.967921451  | 2.416572546   | 5.695340505  |
| C68 | 5.681109958  | 2.549614356   | 3.395707650  |
| C69 | 4.109090928  | 3.503258164   | 5.498543261  |
| C70 | 4.834669751  | 3.640232933   | 3.186036634  |
| C71 | 4.044740287  | 4.113000516   | 4.238712801  |
| C72 | 6.460108767  | 6.368223105   | -1.017564512 |
| C73 | 5.609144644  | 7.437026980   | -1.712303089 |
| C74 | 5.575337039  | 5.189914099   | -0.587560684 |
| C75 | 5.072870543  | 8.550216721   | -3.837121117 |
| C76 | 3.627990908  | 8.156078752   | -4.154628706 |
| C77 | 1.948147484  | 6.338822626   | -4.148390874 |
| C78 | 1.085434297  | 6.456940764   | -2.871209430 |
| C79 | 2.047949854  | 4.898873123   | -4.682345351 |
| C80 | 0.741005841  | 4.174276557   | -5.016039438 |
| C81 | -0.049616700 | 4.681780384   | -6.234591276 |
| C82 | -1.231169724 | 6.878998463   | -6.370485173 |
| C83 | 0.933800176  | 6.289692194   | -0.442937104 |
| C84 | 0.875857741  | 7.727674972   | 0.108389091  |
| C85 | 1.463019503  | 5.368609828   | 0.665378778  |
| C86 | 2.152432219  | 9.778468310   | 0.502914714  |
| C87 | 1.695963098  | 11.109301877  | -0.087867242 |
| C88 | 0.601549522  | 12.289616299  | -1.949091333 |

|       |               |               |              |
|-------|---------------|---------------|--------------|
| C89   | -0.750872579  | 12.888580814  | -1.507328794 |
| C90   | 0.649378243   | 12.100271905  | -3.481071808 |
| C91   | -0.374625482  | 11.077582719  | -3.961470889 |
| C92   | -2.886180790  | 12.484662744  | -0.362461047 |
| C93   | -2.863738443  | 13.669818651  | 0.595321684  |
| C94   | -3.623449973  | 11.284927328  | 0.290639993  |
| C95   | -3.804627057  | 10.139404554  | -0.678580749 |
| C96   | -4.878822574  | 10.138441264  | -1.582284699 |
| C97   | -2.878764162  | 9.084700672   | -0.746467689 |
| C98   | -5.019321545  | 9.132077399   | -2.540172884 |
| C99   | -2.989589797  | 8.082154427   | -1.713980577 |
| C100  | -4.058154917  | 8.121606803   | -2.608326611 |
| C101  | 5.281385337   | -5.477241644  | -7.544018231 |
| C102  | 3.834091269   | -5.063665399  | -7.328039911 |
| C103  | 2.344207323   | -3.279379635  | -6.454033210 |
| C104  | 2.036531994   | -2.013511410  | -7.261611933 |
| C105  | 2.537136936   | 0.374489364   | -7.493456999 |
| C106  | 3.755486047   | 1.290208624   | -7.554409412 |
| C107  | 6.004761672   | 1.852075356   | -6.765137727 |
| C108  | 7.111777761   | 1.470535129   | -7.727177741 |
| C109  | -1.300361619  | -4.668283619  | -8.955040825 |
| C110  | -2.253965850  | -3.468458053  | -9.015794423 |
| C111  | -1.145385730  | -5.138530298  | -7.489728577 |
| C112  | -0.525295700  | -6.547345937  | -7.417204525 |
| C113  | -0.090972571  | -6.877330754  | -6.006563034 |
| C114  | -2.544159683  | -1.055917603  | -8.722506516 |
| C115  | -1.828640841  | 0.091953388   | -9.407998587 |
| C116  | -3.125134351  | -0.718987667  | -7.327557633 |
| C117  | -2.069700906  | -0.711652009  | -6.250470416 |
| C118  | -1.288253929  | 0.429578327   | -6.003546246 |
| C119  | -1.789919896  | -1.884076466  | -5.526184798 |
| C120  | -0.233964965  | 0.380017176   | -5.084184588 |
| C121  | -0.736450457  | -1.931653591  | -4.607802319 |
| C122  | 0.054795614   | -0.798912598  | -4.391344016 |
| C123  | 7.925116522   | -7.380250721  | -2.031962482 |
| C124  | 8.871456558   | -7.466499646  | -0.824094763 |
| C125  | 6.473221499   | -7.716702360  | -1.659959311 |
| C126  | 5.449635877   | -7.492708954  | -2.730675457 |
| C127  | 5.281700761   | -8.214796274  | -3.895679668 |
| C128  | 3.637888686   | -6.745049721  | -3.696031153 |
| C129  | 9.618615591   | -8.632887856  | 1.172519670  |
| C130  | 11.071220504  | -8.611834101  | 0.749942126  |
| C131  | -0.129409332  | -6.836435109  | 1.066849131  |
| C132  | 1.292212468   | -6.610003010  | 1.505318891  |
| C133  | 2.356251025   | -7.126619705  | 0.453789813  |
| C134  | 2.108474333   | -8.634827830  | 0.165294230  |
| C135  | 3.195101995   | -9.240558799  | -0.737604484 |
| C136  | 3.147794770   | -10.739053397 | -0.825422812 |
| C137  | 3.752781726   | -7.030228003  | 1.137798006  |
| C138  | 3.960231540   | -1.315710447  | -1.396839125 |
| Fe139 | 4.367711538   | -2.752790257  | -2.679190448 |
| Fe140 | 2.713179685   | 0.148358322   | -1.087076090 |
| Fe141 | 5.205409039   | -0.071659255  | -0.319940985 |
| Fe142 | 4.522797312   | -0.143170647  | -2.882486658 |
| Fe143 | 4.441859361   | 2.167286018   | -1.516014094 |
| Fe144 | 4.879127323   | -2.593311696  | -0.140732111 |
| Fe145 | 2.382340077   | -2.489146302  | -0.917705966 |
| H146  | -6.822284115  | -6.647809151  | -0.054717806 |
| H147  | -6.595081292  | -5.904407817  | -1.490195715 |
| H148  | -10.075503012 | -3.649949333  | -0.537909755 |
| H149  | -8.905096511  | -5.348696893  | -1.685868805 |

|      |               |              |               |
|------|---------------|--------------|---------------|
| H150 | -9.234640698  | -6.283201141 | -0.229974863  |
| H151 | -8.377072776  | -1.667142742 | 0.514729377   |
| H152 | -10.232478330 | -4.101747550 | 2.364395108   |
| H153 | -10.152847729 | -1.669539162 | 0.612298864   |
| H154 | -10.274889451 | -4.484396550 | 4.662320059   |
| H155 | -7.763901965  | -4.787564919 | 2.978768973   |
| H156 | -9.911913758  | -2.763133745 | 4.936154772   |
| H157 | -3.528251451  | -1.854950839 | 2.889124424   |
| H158 | -6.027008107  | -3.162375577 | 2.316440424   |
| H159 | -5.679555536  | -5.716215509 | 3.466905677   |
| H160 | -5.966758776  | 1.288417462  | 5.476106829   |
| H161 | -6.876710099  | -1.094806745 | 4.077457960   |
| H162 | -5.897023062  | -5.370620188 | 5.201081183   |
| H163 | -4.888583463  | -1.181453540 | 1.959839643   |
| H164 | -6.674235748  | -2.088343934 | 6.643665160   |
| H165 | -7.509917957  | 0.425932480  | 5.705078469   |
| H166 | -1.378684476  | -3.221862289 | 4.290760539   |
| H167 | -0.804606468  | -2.561178108 | 2.738214865   |
| H168 | 0.363672898   | -2.946626263 | 4.016670824   |
| H169 | -1.804201651  | -0.765726713 | 4.163709375   |
| H170 | -6.570691814  | -2.862316966 | 8.809608664   |
| H171 | -2.366957597  | 2.514357437  | 4.275803599   |
| H172 | -3.526646042  | 1.194444956  | 8.386128491   |
| H173 | -3.146612149  | 4.611032302  | 8.020845269   |
| H174 | -0.013170902  | -0.177102679 | 2.561370137   |
| H175 | 1.232450906   | -0.483489031 | 3.776075848   |
| H176 | 7.931394022   | 1.634048965  | 6.395597232   |
| H177 | -3.148024595  | 4.112917725  | 4.318950640   |
| H178 | -3.589790842  | 5.297882355  | 6.440077612   |
| H179 | -1.410207632  | 3.964651373  | 4.673844875   |
| H180 | -1.879197867  | 5.223219396  | 6.932669517   |
| H181 | -3.694067015  | 2.799764649  | 6.381688933   |
| H182 | -0.664018605  | 2.896003085  | 6.843720929   |
| H183 | -2.425447268  | 0.762102424  | 5.893196513   |
| H184 | 0.092824075   | 0.869517512  | 3.993779992   |
| H185 | 1.627208332   | 4.361106839  | 0.243416363   |
| H186 | 0.681887089   | 5.306134478  | 1.438768275   |
| H187 | 2.756951858   | 5.593872237  | 2.131588470   |
| H188 | 2.676831816   | 5.386001626  | 4.764898575   |
| H189 | 4.762554214   | 4.104193125  | 2.201781197   |
| H190 | 6.262785095   | 2.165308675  | 2.554054187   |
| H191 | 5.004034727   | 1.943305587  | 6.680318189   |
| H192 | -2.577302125  | -1.657684914 | 6.449671369   |
| H193 | -2.525957506  | -4.723142220 | 7.454284110   |
| H194 | -2.290546864  | -3.872688513 | 8.997017638   |
| H195 | -4.273370256  | -3.177820310 | 6.894708599   |
| H196 | -6.041485682  | -1.258773387 | 9.371827822   |
| H197 | 3.483538770   | 3.865054118  | 6.318999210   |
| H198 | 0.379062841   | -1.562494112 | 6.149211214   |
| H199 | -3.545118681  | 2.587534818  | 10.786069303  |
| H200 | -3.863948388  | 0.840542007  | 10.627227771  |
| H201 | -1.136343893  | 0.668063158  | 10.734708519  |
| H202 | 9.342347356   | -7.139382207 | 7.218271174   |
| H203 | -1.364440595  | -6.187504970 | -3.351926886  |
| H204 | -0.092259365  | -8.494045934 | 2.058655235   |
| H205 | -1.272225727  | -7.289736060 | -7.732938327  |
| H206 | 0.337286929   | -6.612014500 | -8.096840403  |
| H207 | -2.124667034  | -5.151428675 | -6.986114914  |
| H208 | -1.067198373  | -0.227218660 | -10.160197412 |
| H209 | -1.838968370  | -5.458136607 | -9.502052512  |
| H210 | -3.025613627  | -2.124941293 | -2.711789762  |

|      |              |              |              |
|------|--------------|--------------|--------------|
| H211 | -3.994940707 | -4.515171269 | -1.055654659 |
| H212 | -0.728174077 | -2.168589796 | -8.477864512 |
| H213 | -3.399457898 | -1.279339833 | -9.391445885 |
| H214 | 0.555884052  | -3.767220036 | -9.162796733 |
| H215 | -1.150876648 | -5.579547248 | -1.711904893 |
| H216 | -0.522805389 | -4.408461086 | -6.949390694 |
| H217 | 0.462437826  | -5.275557661 | -9.811176125 |
| H218 | -6.392115666 | -3.214274207 | -3.538863895 |
| H219 | -3.349753708 | -1.892853563 | -1.005326125 |
| H220 | 1.732632496  | -6.330681584 | -6.512789263 |
| H221 | -2.337317446 | -3.937472752 | -0.848984076 |
| H222 | -3.884984171 | 3.521934396  | 2.001063319  |
| H223 | -3.043500780 | 1.200944332  | 1.043926842  |
| H224 | -8.440333192 | 1.922555990  | 2.029421393  |
| H225 | -7.140851725 | 0.794632151  | -0.411932355 |
| H226 | -6.505337928 | 5.000674728  | 0.175181525  |
| H227 | -7.951708719 | 10.002217725 | 1.045255665  |
| H228 | -7.171294810 | 6.658140116  | 2.826003827  |
| H229 | -8.596140911 | 6.617663480  | 0.450054956  |
| H230 | -5.729952302 | 7.739733831  | 0.327058236  |
| H231 | -9.435437517 | 10.349497579 | -2.907702149 |
| H232 | -2.749607754 | 4.719560734  | 0.169266510  |
| H233 | -4.123061176 | 4.484871004  | -0.914405360 |
| H234 | -8.914997072 | 11.570879550 | -0.723817468 |
| H235 | -7.602910353 | 6.506047695  | -1.003864217 |
| H236 | -5.504276604 | 2.365085625  | 0.043637752  |
| H237 | -7.229335595 | 0.634109432  | 2.021610230  |
| H238 | -9.469308301 | 2.474200327  | -2.401916856 |
| H239 | -1.465275933 | 0.912636878  | -2.840813708 |
| H240 | -9.957585641 | 0.807097454  | -2.042806486 |
| H241 | 9.570745635  | 2.476426359  | 4.891061973  |
| H242 | 8.158774011  | 2.754860379  | 4.113981173  |
| H243 | 2.607520714  | 5.680126544  | -1.679343179 |
| H244 | -0.108637683 | 6.005388459  | -0.649129137 |
| H245 | 2.695110321  | 8.157970829  | -0.735296015 |
| H246 | -2.440794196 | 3.297412693  | -2.575109895 |
| H247 | -3.779282100 | 4.148152877  | -4.368628626 |
| H248 | -3.537866120 | 5.531461831  | -3.646656391 |
| H249 | -4.132475599 | 1.302537922  | -4.932804104 |
| H250 | -5.819785535 | 1.269220732  | -5.525721270 |
| H251 | 1.673574930  | 11.814235605 | -3.761599665 |
| H252 | 0.413422075  | 13.067394013 | -3.942631097 |
| H253 | 1.099605296  | 9.589124089  | -4.207073862 |
| H254 | -0.566655275 | 9.083058113  | -4.374513733 |
| H255 | -0.612146716 | 8.274325373  | -7.736688351 |
| H256 | -0.545101596 | 3.836538642  | -6.735950234 |
| H257 | -5.870587477 | 9.136408496  | -3.225824510 |
| H258 | -2.050029180 | 9.023855963  | -0.034972924 |
| H259 | -2.672445907 | 7.439009902  | -5.005875137 |
| H260 | 2.581015285  | 4.280945931  | -3.942565223 |
| H261 | 3.978493839  | 6.234122798  | -3.503349180 |
| H262 | 0.077387774  | 4.133615691  | -4.138077281 |
| H263 | -7.776290764 | 0.041700463  | -2.646049194 |
| H264 | 5.591276850  | 8.711846506  | -4.791977560 |
| H265 | -5.444560554 | -0.842135390 | -4.045377205 |
| H266 | 2.684979876  | 4.930358027  | -5.581672059 |
| H267 | -2.231079207 | 7.302186736  | -1.794023243 |
| H268 | -5.881101528 | 3.437876831  | -4.327999264 |
| H269 | 5.022837722  | 9.515921030  | -3.313954666 |
| H270 | -0.053244110 | 6.670001254  | -8.045754330 |
| H271 | -2.462306976 | 8.508402173  | -6.344088143 |

|      |              |               |              |
|------|--------------|---------------|--------------|
| H272 | -4.780477974 | -3.582182654  | -3.774127910 |
| H273 | -5.683351656 | -2.837478506  | -1.366287247 |
| H274 | -5.622902393 | 10.937104703  | -1.542076006 |
| H275 | -4.922850638 | 1.664255686   | -2.616443157 |
| H276 | 1.454328801  | 6.986115185   | -4.885563634 |
| H277 | 0.636472893  | 5.126094241   | -6.967222093 |
| H278 | 1.023987390  | 3.132711637   | -5.222006358 |
| H279 | -1.786507972 | 5.343889583   | -5.164994389 |
| H280 | 1.671998654  | 9.694773217   | 1.489275204  |
| H281 | 0.872507000  | 10.160548654  | -1.712430218 |
| H282 | 1.346508778  | 13.051588089  | -1.677859466 |
| H283 | 3.236075635  | 9.859089394   | 0.662806070  |
| H284 | -1.208136674 | 11.157220004  | -0.527218778 |
| H285 | 5.904861831  | -4.588611420  | -7.720069797 |
| H286 | 5.614091956  | -5.914732108  | -6.579373308 |
| H287 | 7.969145550  | -6.332735544  | -2.363203243 |
| H288 | 6.302470464  | -6.847249375  | -8.655084986 |
| H289 | 4.691598323  | -7.132510818  | -8.565781062 |
| H290 | 6.222837676  | 4.422006036   | -0.143745462 |
| H291 | 6.470601559  | 7.357634823   | 0.766098266  |
| H292 | 6.488969492  | 6.982134172   | -3.515189815 |
| H293 | 4.852659682  | 5.530603713   | 0.168022443  |
| H294 | 7.807968340  | 7.638390431   | -0.135378829 |
| H295 | 6.415183884  | 1.860630340   | -5.742906020 |
| H296 | 7.221856877  | 5.998624696   | -1.721703723 |
| H297 | 3.521427758  | -6.156978517  | 6.754686690  |
| H298 | 5.540545924  | -7.753943800  | 5.091413904  |
| H299 | 4.855063862  | 0.161046790   | -6.185878301 |
| H300 | 4.011925945  | 0.284109477   | 3.693448415  |
| H301 | 2.213024621  | 0.195131749   | -8.526808039 |
| H302 | -0.537216600 | -2.839069701  | -4.035285278 |
| H303 | 1.734950469  | 0.954424658   | -7.007384101 |
| H304 | 2.979222832  | -3.765283220  | 5.643004756  |
| H305 | 3.225177288  | -0.997359760  | -5.953285054 |
| H306 | 2.961542979  | -4.564196667  | 4.065583164  |
| H307 | 3.315186231  | -6.729658361  | 5.084005368  |
| H308 | 5.340652898  | -5.290505973  | 4.418267902  |
| H309 | 5.312798305  | -4.583746761  | 6.042952501  |
| H310 | -3.893286427 | -1.472743347  | -7.102333956 |
| H311 | 3.819383673  | -8.610584860  | 7.392486452  |
| H312 | 2.809702276  | -11.212675839 | 6.121803527  |
| H313 | 0.868111108  | -0.816449136  | -3.664506048 |
| H314 | 3.818710578  | -10.704135626 | 8.814369727  |
| H315 | 2.285946369  | -10.988961375 | 8.310245509  |
| H316 | 4.658864774  | -3.057282173  | 3.269934339  |
| H317 | 0.374304131  | 1.262757013   | -4.882287614 |
| H318 | -2.414064927 | -2.768244321  | -5.675080951 |
| H319 | 6.576902458  | -10.535807684 | 1.604832790  |
| H320 | 6.422372433  | -8.779455750  | -1.362572216 |
| H321 | 5.475263726  | -8.526385071  | 2.462597431  |
| H322 | 5.939877386  | -11.331697157 | 0.446506346  |
| H323 | 6.864408300  | 0.647545920   | -8.440541782 |
| H324 | 5.845102354  | -5.482410107  | 1.635963466  |
| H325 | 1.488024256  | -7.088892522  | 2.476045237  |
| H326 | 4.453796309  | -3.300230743  | -6.479918891 |
| H327 | 2.091693875  | -9.170617038  | 1.128088352  |
| H328 | 3.711951169  | -8.059655334  | -5.347725035 |
| H329 | 2.721739581  | -6.213055724  | -3.914521649 |
| H330 | 4.289310990  | -11.869567172 | 6.832326419  |
| H331 | 4.521006464  | -0.947258288  | 2.574053462  |
| H332 | 7.474463014  | -6.246008975  | 3.215909120  |

|       |              |               |              |
|-------|--------------|---------------|--------------|
| H333  | 6.765288331  | -4.234042483  | 1.750836951  |
| H334  | 7.516207612  | -6.898580367  | 5.514710215  |
| H335  | 3.345131885  | -1.859585758  | 6.384729202  |
| H336  | 2.026223867  | -12.185039345 | -1.302593566 |
| H337  | 3.086230928  | -8.821612824  | -1.749383989 |
| H338  | 4.195267672  | -8.983090247  | -0.373048840 |
| H339  | 1.126881613  | -8.754313196  | -0.317179143 |
| H340  | 2.336854099  | -3.062565567  | -5.374690846 |
| H341  | -1.504727910 | 1.354022485   | -6.545121247 |
| H342  | -3.623973429 | 0.259546160   | -7.408042849 |
| H343  | 1.449548442  | -5.527477597  | 1.592833566  |
| H344  | 7.352102443  | -7.788110930  | 3.376406982  |
| H345  | 5.892335233  | -9.504375909  | 3.597156854  |
| H346  | 2.940769925  | -0.316478967  | 5.724970729  |
| H347  | 5.868151414  | -9.014602066  | -4.333384611 |
| H348  | 6.184714067  | -7.126031796  | -0.781358713 |
| H349  | 1.576668758  | -4.021464603  | -6.681354781 |
| H350  | 5.686948161  | 2.878904044   | -7.007243671 |
| H351  | 6.251973406  | 0.042978990   | 5.590615187  |
| H352  | 6.835026199  | 0.198734212   | 3.913512339  |
| H353  | 9.355093525  | -7.921417015  | -3.399602569 |
| H354  | 8.505497828  | -9.191507809  | -2.815928445 |
| H355  | 9.433654629  | -9.612703417  | 1.640966231  |
| H356  | 7.944054352  | -9.169567543  | -0.030709107 |
| H357  | 11.261875883 | -8.973509361  | -0.288828789 |
| H358  | 9.438297607  | -7.857784921  | 1.933972688  |
| H359  | 9.346373671  | -0.509707431  | 4.681002855  |
| H360  | -1.912899554 | 13.801090620  | 1.165229681  |
| H361  | 8.169213578  | -6.569105186  | 8.434552234  |
| H362  | 8.164692030  | -4.315779166  | 6.859686129  |
| H363  | -3.442796012 | 12.800735152  | -1.259371587 |
| H364  | -3.058877326 | 10.955725768  | 1.176888624  |
| H365  | -4.598873249 | 11.652985880  | 0.639633914  |
| H366  | -4.968767740 | 7.206466858   | -4.068257797 |
| H367  | 1.956044238  | -1.086876609  | -0.171138334 |
| H368  | -0.251820735 | -1.383235057  | -0.406158009 |
| H369  | 1.228378886  | 0.542801990   | -0.907422070 |
| Mo370 | 3.752517231  | -4.891929479  | -1.035930648 |
| N371  | -7.275709324 | -6.445061736  | -0.949928755 |
| N372  | -9.329681956 | -3.520515865  | 0.141258610  |
| N373  | -9.732457250 | -3.434369085  | 2.947073028  |
| N374  | -7.426467212 | -4.686265538  | 3.935787970  |
| N375  | -5.361498713 | -2.893507884  | 3.043167540  |
| N376  | -6.117342441 | -0.588823508  | 4.539242085  |
| N377  | -6.143944002 | -1.504159770  | 7.295055112  |
| N378  | -3.795933620 | -3.088594038  | 7.797832857  |
| N379  | -1.595238760 | -1.881197982  | 6.595573011  |
| N380  | -1.618142817 | 1.092303517   | 6.426036591  |
| N381  | -2.845579129 | 1.636312080   | 9.007903259  |
| N382  | 3.148218929  | -10.497714490 | 8.070715782  |
| N383  | 4.377178265  | -8.670945616  | 6.534055292  |
| N384  | 4.203359066  | -2.890930081  | 4.172091098  |
| N385  | 3.236538058  | -1.275230860  | 5.563179269  |
| N386  | 3.988993577  | -0.701522510  | 3.438040389  |
| N387  | 7.364253345  | -6.816194713  | 6.543664422  |
| N388  | -5.444992624 | -2.829759254  | -3.516026370 |
| N389  | -1.698706804 | -5.614838429  | -2.572711977 |
| N390  | -5.571676197 | -0.207904019  | -3.241043616 |
| N391  | -7.961391519 | 1.041506623   | -2.617385942 |
| N392  | -7.810115583 | 1.351692626   | 0.136349460  |
| N393  | -5.578645076 | 2.970191351   | 0.861256456  |

|      |              |               |              |
|------|--------------|---------------|--------------|
| N394 | -2.443089102 | 2.568866146   | -1.849891955 |
| N395 | -2.139554771 | 0.615893644   | -0.820480875 |
| N396 | -6.029175222 | 5.689926431   | 0.752564352  |
| N397 | -8.699560281 | 8.601386780   | -1.881922084 |
| N398 | -8.765352989 | 10.576652370  | -0.872234960 |
| N399 | 8.783449253  | 2.010045364   | 4.434831359  |
| N400 | 7.161772628  | 6.901315954   | 0.161564174  |
| N401 | 5.830455783  | 7.600111236   | -3.047905373 |
| N402 | 3.298329199  | 6.863427391   | -3.958145388 |
| N403 | -1.092658898 | 5.653003987   | -5.879395123 |
| N404 | -0.483677076 | 7.324895128   | -7.402234335 |
| N405 | -2.081910716 | 7.753074651   | -5.779534559 |
| N406 | 1.688629952  | 6.166287951   | -1.686698347 |
| N407 | 1.884542569  | 8.569941717   | -0.263055304 |
| N408 | 0.970488573  | 11.063502376  | -1.245047684 |
| N409 | 0.099654107  | 9.816629647   | -4.133123348 |
| N410 | -1.534783829 | 12.097650308  | -0.734305813 |
| N411 | 5.387854304  | -6.390915325  | -8.685686822 |
| N412 | 3.643819078  | -3.833758782  | -6.814013269 |
| N413 | 2.694127323  | -0.913067256  | -6.842165436 |
| N414 | 4.854928603  | 0.967558977   | -6.824851688 |
| N415 | -0.056006344 | -4.402905540  | -9.689764402 |
| N416 | -1.713360803 | -2.247334760  | -8.752313310 |
| N417 | 8.412113650  | -8.223702047  | -3.140017505 |
| N418 | 4.411454916  | -6.569166154  | -2.627272914 |
| N419 | 4.136251571  | -7.727391791  | -4.486098421 |
| N420 | 8.721547575  | -8.513334007  | 0.035201559  |
| O421 | -7.308205061 | -4.246033993  | 0.898659431  |
| O422 | -8.521309174 | -1.506490704  | 3.019431087  |
| O423 | -7.782876433 | -3.684461659  | 5.961116564  |
| O424 | -4.262296760 | -3.474497323  | 4.946307023  |
| O425 | -3.924905541 | 0.021003521   | 4.528314129  |
| O426 | -5.355127537 | 0.578143286   | 7.804855517  |
| O427 | -3.995133913 | -2.565040299  | 10.025300090 |
| O428 | -0.158014568 | -3.422418234  | 7.513975472  |
| O429 | 0.554774384  | 0.727520516   | 7.031387735  |
| O430 | -1.094970344 | 3.052715929   | 9.285164280  |
| O431 | -1.765145871 | 1.619711755   | 12.427474468 |
| O432 | 5.146193145  | -10.251171299 | 5.028001906  |
| O433 | 5.872214963  | -7.009096131  | 8.281822295  |
| O434 | 10.091016191 | -4.659638248  | 7.436245086  |
| O435 | -5.628720841 | -0.281335147  | -0.947348352 |
| O436 | -3.376027415 | -4.771860509  | -3.854481045 |
| O437 | -7.096234876 | 3.111692757   | -3.052733011 |
| O438 | -5.105640900 | 3.117526544   | -4.860841805 |
| O439 | -9.824979378 | 2.458745018   | 0.170187508  |
| O440 | -6.376353138 | 3.111096401   | 2.995692138  |
| O441 | -4.322955428 | 6.045138731   | 2.225865264  |
| O442 | -6.675062959 | 8.627532407   | 2.615231837  |
| O443 | 9.009907396  | -0.674579251  | 6.688163483  |
| O444 | 3.210815790  | 5.181753157   | 3.975279921  |
| O445 | 4.773886843  | 8.127492321   | -1.099223184 |
| O446 | 2.852762166  | 9.025896700   | -4.605413811 |
| O447 | -0.099363907 | 6.822462263   | -2.959432037 |
| O448 | -0.035777991 | 8.058887028   | 0.879864951  |
| O449 | 2.672673485  | 5.907444665   | 1.208168794  |
| O450 | 1.972178575  | 12.167280194  | 0.492798735  |
| O451 | -1.074204259 | 14.036187525  | -1.844768569 |
| O452 | -1.572184944 | 11.374951266  | -4.101427111 |
| O453 | -3.820508724 | 14.410257742  | 0.760904734  |
| O454 | -4.119468857 | 7.125585159   | -3.593208216 |

|                       |                     |              |               |              |
|-----------------------|---------------------|--------------|---------------|--------------|
|                       | O455                | 2.901648553  | -5.863743983  | -7.597857526 |
|                       | O456                | 1.254094666  | -2.026264731  | -8.237725354 |
|                       | O457                | 3.678659604  | 2.317881392   | -8.249245512 |
|                       | O458                | 8.206088252  | 2.012383621   | -7.735096383 |
|                       | O459                | -3.461801735 | -3.620457204  | -9.270684912 |
|                       | O460                | -0.852824924 | -7.280780588  | -5.134070949 |
|                       | O461                | 1.210122927  | -6.666317300  | -5.718576317 |
|                       | O462                | -2.070958125 | 1.274496247   | -9.214949018 |
|                       | O463                | 9.809562043  | -6.660863589  | -0.676920382 |
|                       | O464                | 11.990676252 | -8.305240335  | 1.496391044  |
|                       | O465                | -0.784810009 | -6.092734750  | 0.357168115  |
|                       | O466                | -0.724214981 | -7.997498342  | 1.504950489  |
|                       | O467                | 4.066535753  | -11.501005505 | -0.529139875 |
|                       | O468                | 1.956977829  | -11.206621764 | -1.285048075 |
|                       | O469                | 4.614554118  | -6.280192003  | 0.532595603  |
|                       | O470                | 3.995057179  | -7.699115961  | 2.169876241  |
|                       | O471                | 2.297054787  | -6.370596996  | -0.699966880 |
|                       | O472                | 7.840336047  | -7.002885327  | 3.740176640  |
|                       | O473                | 6.463947991  | -5.015689963  | 2.254798408  |
|                       | O474                | -3.073629219 | 4.749723312   | -4.015582616 |
|                       | O475                | 6.781069233  | -11.241368399 | 0.939951269  |
|                       | O476                | 6.243931220  | -9.090191056  | 2.766605034  |
|                       | S477                | 4.618679028  | 4.449150782   | -1.988300513 |
|                       | S478                | 2.793912531  | 1.393323932   | -2.986990308 |
|                       | S479                | 2.428656064  | -3.881739028  | -2.694870752 |
|                       | S480                | 3.716050524  | 1.363062548   | 0.494685707  |
|                       | S481                | 0.148686906  | -2.540663806  | -1.002166431 |
|                       | S482                | 4.960749680  | -1.635863286  | -4.532161920 |
|                       | S483                | 3.144177960  | -3.570003368  | 0.857335963  |
|                       | S484                | 6.344765348  | 0.945906167   | -1.944329330 |
|                       | S485                | 5.916496286  | -3.986538263  | -1.548528756 |
|                       | S486                | 6.204748513  | -1.399342151  | 1.168450776  |
| <b>15(a)</b>          | bm2cnx2b2647u.car_3 |              |               |              |
| Fe( 139) 0.573 2.582  | C1                  | -8.022513158 | -4.743875785  | -0.987138647 |
| Fe( 140) 0.434 -2.135 | C2                  | -8.084549926 | -5.844341382  | -2.052408160 |
| Fe( 141) 0.580 2.887  | C3                  | -9.160029448 | -2.801730677  | -0.001048429 |
| Fe( 142) 0.539 -2.407 | C4                  | -9.069434384 | -3.159232515  | 1.481639022  |
| Fe( 143) 0.571 2.967  | C5                  | -9.552111544 | -4.771434381  | 3.249783630  |
| Fe( 144) 0.496 -1.870 | C6                  | -8.129927178 | -5.125327142  | 3.697799281  |
| Fe( 145) 0.305 0.580  | C7                  | -5.907552049 | -5.890904228  | 3.011543634  |
| <b>S=3/2</b>          | C8                  | -5.078451004 | -4.610373895  | 3.157111020  |
|                       | C9                  | -4.625344226 | -2.353284260  | 2.357678009  |
|                       | C10                 | -4.955979859 | -1.577320997  | 3.640639624  |
|                       | C11                 | -6.626493504 | -0.939064292  | 5.285736533  |
|                       | C12                 | -6.146478527 | -1.630692946  | 6.569946565  |
|                       | C13                 | -6.076046566 | -3.708240558  | 7.863011051  |
|                       | C14                 | -4.639744869 | -4.189447397  | 8.097485171  |
|                       | C15                 | -2.597691450 | -5.105531238  | 7.077252918  |
|                       | C16                 | -1.417048291 | -4.225758954  | 6.657461820  |
|                       | C17                 | -0.749136716 | -2.081324551  | 5.607379615  |
|                       | C18                 | -0.759068529 | -0.779418076  | 6.428278105  |
|                       | C19                 | -0.895437157 | -1.855550686  | 4.077131026  |
|                       | C20                 | 0.030929562  | -0.744086343  | 3.570467655  |
|                       | C21                 | -0.647837603 | -3.162050953  | 3.314692062  |
|                       | C22                 | -2.058486970 | 1.163045619   | 7.210700969  |
|                       | C23                 | -2.304521481 | 0.873846624   | 8.705332452  |
|                       | C24                 | -3.133408425 | 2.092686208   | 6.598962076  |
|                       | C25                 | -3.352964901 | 3.336558398   | 7.469667926  |
|                       | C26                 | -2.746135654 | 2.500940178   | 5.171847181  |
|                       | C27                 | -3.611210464 | -0.279503778  | 10.398004828 |



|     |              |               |              |
|-----|--------------|---------------|--------------|
| C28 | -2.393661002 | -0.671825118  | 11.208723426 |
| C29 | 3.969694914  | -11.754953944 | 5.065931085  |
| C30 | 4.767653056  | -10.558343798 | 4.548936417  |
| C31 | 5.225151542  | -8.140672552  | 4.994945500  |
| C32 | 6.236158044  | -7.851275922  | 6.120271749  |
| C33 | 4.152204956  | -7.040976532  | 4.893121730  |
| C34 | 4.724276318  | -5.651299230  | 4.602454595  |
| C35 | 3.616378087  | -4.667391828  | 4.232804384  |
| C36 | 3.703113203  | -2.168855230  | 4.294422459  |
| C37 | 8.542952032  | -7.205171430  | 6.637269454  |
| C38 | 8.927340587  | -5.740879216  | 6.699520952  |
| C39 | -4.867333116 | -2.106562165  | -2.731004851 |
| C40 | -5.207735090 | -0.639523209  | -2.424752900 |
| C41 | -3.384296647 | -2.336623665  | -2.361976733 |
| C42 | -2.925292062 | -3.809207300  | -2.304961886 |
| C43 | -2.394074928 | -4.374138082  | -3.620771407 |
| C44 | -5.530120209 | 1.566508137   | -3.449648589 |
| C45 | -6.932435723 | 2.028008618   | -3.026770641 |
| C46 | -5.093563368 | 2.274330557   | -4.747166176 |
| C47 | -9.104509485 | 1.348154926   | -2.118319285 |
| C48 | -8.978177668 | 1.410346232   | -0.588501960 |
| C49 | -7.576732322 | 0.928228254   | 1.377199985  |
| C50 | -6.501628948 | 1.890332450   | 1.883378910  |
| C51 | -4.621232280 | 3.381990579   | 1.405378824  |
| C52 | -5.223335552 | 4.685101173   | 1.979329710  |
| C53 | -3.717888473 | 3.842467548   | 0.251819665  |
| C54 | -2.849960398 | 2.818211834   | -0.401633837 |
| C55 | -2.281435769 | 1.640481731   | 0.020038289  |
| C56 | -1.542744681 | 2.043627008   | -2.034069999 |
| C57 | -6.939408425 | 6.415125417   | 1.603372056  |
| C58 | -7.339823007 | 6.518334811   | 3.075552679  |
| C59 | -8.179486958 | 6.565410208   | 0.690268448  |
| C60 | -8.637058979 | 7.969513177   | 0.422461049  |
| C61 | -8.731660479 | 9.065625188   | 1.258187852  |
| C62 | -9.406620165 | 9.591834743   | -0.785552707 |
| C63 | 7.786184680  | 0.647236118   | 5.932426917  |
| C64 | 8.653787281  | -0.596552545  | 5.976944732  |
| C65 | 6.451080945  | 0.237313272   | 5.256580973  |
| C66 | 5.459804673  | 1.374135753   | 5.175770706  |
| C67 | 4.576854072  | 1.649569522   | 6.236514827  |
| C68 | 5.398554551  | 2.196716288   | 4.036844945  |
| C69 | 3.660211418  | 2.704249004   | 6.164104921  |
| C70 | 4.495601468  | 3.256622177   | 3.953508598  |
| C71 | 3.626640052  | 3.508473861   | 5.019121191  |
| C72 | 6.104462018  | 6.681298401   | 0.329580955  |
| C73 | 5.225458453  | 7.819063657   | -0.204268658 |
| C74 | 5.259560831  | 5.414478049   | 0.542312965  |
| C75 | 4.701214690  | 9.257403108   | -2.129331164 |
| C76 | 3.299132626  | 8.853986748   | -2.592992535 |
| C77 | 1.712612814  | 6.990828510   | -2.961250033 |
| C78 | 0.793692389  | 6.846732857   | -1.725758931 |
| C79 | 1.902106350  | 5.670771084   | -3.732303063 |
| C80 | 0.644549076  | 4.947469429   | -4.224322975 |
| C81 | -0.133509522 | 5.610613066   | -5.374110389 |
| C82 | -1.382920258 | 7.770558507   | -5.210610780 |
| C83 | 0.569721195  | 6.333290671   | 0.647136933  |
| C84 | 0.437147782  | 7.656608966   | 1.427367956  |
| C85 | 1.084288810  | 5.259203324   | 1.615999071  |
| C86 | 1.597991660  | 9.662867948   | 2.203121088  |
| C87 | 1.065847923  | 11.043032896  | 1.829073967  |
| C88 | -0.012084820 | 12.461917518  | 0.134428377  |

|       |              |               |              |
|-------|--------------|---------------|--------------|
| C89   | -1.412402428 | 12.902388384  | 0.610961356  |
| C90   | 0.092913439  | 12.534385967  | -1.404714368 |
| C91   | -0.850956305 | 11.546178486  | -2.080758624 |
| C92   | -3.571656593 | 12.197523511  | 1.532982995  |
| C93   | -3.668233776 | 13.216065761  | 2.662018158  |
| C94   | -4.264985180 | 10.874696077  | 1.957678228  |
| C95   | -4.336381124 | 9.887583078   | 0.815603037  |
| C96   | -5.348465883 | 9.997210631   | -0.149943708 |
| C97   | -3.359944886 | 8.894261010   | 0.644754482  |
| C98   | -5.376482355 | 9.160547752   | -1.266633782 |
| C99   | -3.360298377 | 8.060294337   | -0.477883851 |
| C100  | -4.369397673 | 8.208941767   | -1.425592199 |
| C101  | 5.875270261  | -3.906805250  | -8.059228397 |
| C102  | 4.404715905  | -3.603255394  | -7.829565707 |
| C103  | 2.804210318  | -2.065719170  | -6.714173710 |
| C104  | 2.468335641  | -0.698912748  | -7.320970518 |
| C105  | 2.854643128  | 1.712130900   | -7.168440552 |
| C106  | 3.988467397  | 2.712659625   | -6.967682752 |
| C107  | 6.194683084  | 3.240124588   | -6.049551732 |
| C108  | 7.375784220  | 3.110576579   | -6.990020886 |
| C109  | -0.657966696 | -3.158896121  | -9.637584327 |
| C110  | -1.671166679 | -2.013006239  | -9.540277433 |
| C111  | -0.545351037 | -3.858191333  | -8.263100576 |
| C112  | 0.122042715  | -5.240143231  | -8.386960853 |
| C113  | 0.515980844  | -5.764842615  | -7.024420219 |
| C114  | -2.104226952 | 0.298814595   | -8.872632162 |
| C115  | -1.452467228 | 1.584855831   | -9.340415288 |
| C116  | -2.760066203 | 0.370765094   | -7.472225202 |
| C117  | -1.759095266 | 0.198382425   | -6.359941425 |
| C118  | -0.955549821 | 1.269964857   | -5.935659285 |
| C119  | -1.547694615 | -1.069079857  | -5.793416075 |
| C120  | 0.059906479  | 1.060619376   | -4.998636728 |
| C121  | -0.531998028 | -1.277514230  | -4.854891700 |
| C122  | 0.285662973  | -0.212861735  | -4.468440729 |
| C123  | 8.394399488  | -6.567773593  | -2.812094151 |
| C124  | 9.298932849  | -6.804262989  | -1.589824369 |
| C125  | 6.931867782  | -6.956259377  | -2.537544973 |
| C126  | 5.946933352  | -6.612163379  | -3.613349353 |
| C127  | 5.883738312  | -7.132318834  | -4.890706785 |
| C128  | 4.130626792  | -5.824902455  | -4.541443092 |
| C129  | 10.028438215 | -8.259486387  | 0.222560544  |
| C130  | 11.495042931 | -8.070758651  | -0.094208588 |
| C131  | 0.172801396  | -6.878421997  | -0.088136449 |
| C132  | 1.553626844  | -6.697301069  | 0.474572676  |
| C133  | 2.682857482  | -6.962684938  | -0.604370007 |
| C134  | 2.538116340  | -8.409233706  | -1.164660550 |
| C135  | 3.715176705  | -8.807018790  | -2.070987362 |
| C136  | 3.745953481  | -10.267250226 | -2.423987354 |
| C137  | 4.043448979  | -6.916020402  | 0.160756790  |
| C138  | 4.109169138  | -0.874615790  | -1.385525229 |
| Fe139 | 4.637938998  | -2.071517796  | -2.877850100 |
| Fe140 | 2.582463920  | 0.313443946   | -0.970146476 |
| Fe141 | 5.086420164  | 0.283208101   | -0.063143692 |
| Fe142 | 4.601058836  | 0.534096492   | -2.653682180 |
| Fe143 | 4.067579036  | 2.617188196   | -1.067182016 |
| Fe144 | 5.038334886  | -2.288774644  | -0.319401133 |
| Fe145 | 2.650098186  | -2.152047702  | -1.087263220 |
| H146  | -6.391810702 | -6.831795035  | -1.482987029 |
| H147  | -6.172901863 | -5.862241767  | -2.779292937 |
| H148  | -9.854120064 | -4.036065038  | -1.601785936 |
| H149  | -8.504637095 | -5.421720248  | -2.979050583 |

|      |               |              |               |
|------|---------------|--------------|---------------|
| H150 | -8.820025094  | -6.588034082 | -1.698227324  |
| H151 | -8.328504037  | -2.110875865 | -0.199793457  |
| H152 | -10.095203232 | -4.913016667 | 1.170189724   |
| H153 | -10.102576670 | -2.263840204 | -0.168776093  |
| H154 | -10.194207275 | -5.653432291 | 3.374625665   |
| H155 | -7.621041195  | -5.618378483 | 1.772444059   |
| H156 | -9.910868345  | -3.984656928 | 3.925769918   |
| H157 | -3.538101708  | -2.507678404 | 2.353440942   |
| H158 | -5.960215775  | -3.796031425 | 1.471451904   |
| H159 | -5.502182518  | -6.497645194 | 2.190239608   |
| H160 | -6.209281909  | 0.075399099  | 5.289840030   |
| H161 | -6.956280537  | -2.096032228 | 3.500118163   |
| H162 | -5.798112761  | -6.452118375 | 3.946640522   |
| H163 | -4.890894782  | -1.743829372 | 1.481592849   |
| H164 | -6.810459853  | -3.464421936 | 5.873709160   |
| H165 | -7.722716244  | -0.869962804 | 5.314222803   |
| H166 | -1.317520149  | -3.964132942 | 3.654439734   |
| H167 | -0.818782407  | -3.013356435 | 2.237834283   |
| H168 | 0.392164957   | -3.500840812 | 3.441025878   |
| H169 | -1.935924798  | -1.539517352 | 3.897999044   |
| H170 | -6.726326340  | -4.595164083 | 7.869663731   |
| H171 | -2.648255556  | 1.632780117  | 4.503893286   |
| H172 | -3.909346970  | -0.390224162 | 8.289723524   |
| H173 | -3.695041000  | 3.084165846  | 8.483172535   |
| H174 | -0.149513702  | -0.561864172 | 2.499801616   |
| H175 | 1.089720096   | -1.021817382 | 3.674325937   |
| H176 | 7.559883871   | 0.928508928  | 6.979629006   |
| H177 | -3.509898988  | 3.169554890  | 4.748190526   |
| H178 | -4.110503208  | 3.985205886  | 7.005352444   |
| H179 | -1.785600774  | 3.042531051  | 5.175992564   |
| H180 | -2.420856034  | 3.915501801  | 7.562604321   |
| H181 | -4.084004540  | 1.530281452  | 6.558637119   |
| H182 | -1.085542072  | 1.675813745  | 7.187162363   |
| H183 | -2.702067040  | -0.363505767 | 5.840549133   |
| H184 | -0.127785293  | 0.209261648  | 4.097326521   |
| H185 | 1.293617386   | 4.333524375  | 1.049466319   |
| H186 | 0.272565086   | 5.060917375  | 2.334500638   |
| H187 | 2.333532159   | 5.261275150  | 3.136939412   |
| H188 | 2.159565581   | 4.605438941  | 5.662764663   |
| H189 | 4.444146291   | 3.869616122  | 3.053810097   |
| H190 | 6.048601478   | 1.987864268  | 3.184644912   |
| H191 | 4.596174165   | 1.024189592  | 7.134067302   |
| H192 | -2.727756118  | -2.821732138 | 5.979736052   |
| H193 | -2.557398466  | -6.012881588 | 6.455908012   |
| H194 | -2.427079233  | -5.400819259 | 8.121378331   |
| H195 | -4.360781052  | -4.489158807 | 6.060696638   |
| H196 | -6.340688649  | -3.084213882 | 8.726292809   |
| H197 | 2.969406493   | 2.893294501  | 6.990965034   |
| H198 | 0.228650576   | -2.539037230 | 5.808356501   |
| H199 | -4.106959530  | 0.576179039  | 10.885164387  |
| H200 | -4.304289847  | -1.135551214 | 10.420694360  |
| H201 | -1.582986044  | -1.170411171 | 10.628845855  |
| H202 | 9.435833943   | -7.805945455 | 6.407101907   |
| H203 | -0.929980615  | -5.596165354 | -4.375189545  |
| H204 | 0.217990108   | -8.685687747 | 0.581288127   |
| H205 | -0.588533804  | -5.948092356 | -8.836516031  |
| H206 | 1.007350202   | -5.178677889 | -9.037188252  |
| H207 | -1.543409943  | -3.986340468 | -7.815566002  |
| H208 | -0.715343395  | 1.448657392  | -10.166526156 |
| H209 | -1.130270009  | -3.867105740 | -10.335144318 |
| H210 | -2.756093316  | -1.773026173 | -3.070052850  |

|      |              |              |               |
|------|--------------|--------------|---------------|
| H211 | -3.762684356 | -4.453538125 | -1.985098807  |
| H212 | -0.228415963 | -0.739437183 | -8.755281270  |
| H213 | -2.923210884 | 0.139324648  | -9.603359160  |
| H214 | 1.175503981  | -2.189861105 | -9.583760211  |
| H215 | -0.874082754 | -5.380594935 | -2.625917055  |
| H216 | 0.024528612  | -3.208236334 | -7.581971146  |
| H217 | 1.150197613  | -3.535834698 | -10.529965572 |
| H218 | -6.059483397 | -2.853901370 | -4.243485928  |
| H219 | -3.222474557 | -1.891351645 | -1.369312638  |
| H220 | 2.337502525  | -5.090950395 | -7.358747154  |
| H221 | -2.153703345 | -3.912835795 | -1.529829431  |
| H222 | -4.027857930 | 2.932410896  | 2.214574330   |
| H223 | -2.363406479 | 1.104427079  | 0.958031662   |
| H224 | -8.511439885 | 1.219549604  | 1.874583373   |
| H225 | -7.105425303 | 0.506893452  | -0.661918835  |
| H226 | -6.800943113 | 4.481268991  | 0.686562840   |
| H227 | -8.482308402 | 9.212345228  | 2.303333654   |
| H228 | -7.675433925 | 5.551902623  | 3.523459968   |
| H229 | -9.004350088 | 5.951905245  | 1.094375446   |
| H230 | -6.207717945 | 7.208952273  | 1.384317721   |
| H231 | -9.784594435 | 10.197567445 | -1.606150338  |
| H232 | -3.068468230 | 4.633065000  | 0.663436393   |
| H233 | -4.342026454 | 4.324031739  | -0.518442563  |
| H234 | -9.405257842 | 11.037947141 | 0.777488452   |
| H235 | -7.924548404 | 6.129561165  | -0.288227740  |
| H236 | -5.584548284 | 2.025961438  | 0.034809486   |
| H237 | -7.330388918 | -0.084755471 | 1.729067112   |
| H238 | -9.511155376 | 2.312274692  | -2.447826637  |
| H239 | -1.014746221 | 1.921341242  | -2.975320484  |
| H240 | -9.836956309 | 0.570659495  | -2.371051287  |
| H241 | 9.218245923  | 2.097661395  | 5.721332568   |
| H242 | 7.814794309  | 2.448129082  | 4.959764707   |
| H243 | 2.328409671  | 6.024981737  | -0.580379111  |
| H244 | -0.453133560 | 6.059905274  | 0.349505603   |
| H245 | 2.267697463  | 8.291032678  | 0.744970480   |
| H246 | -2.626159650 | 3.868576316  | -2.290352154  |
| H247 | -3.870714212 | 4.651960743  | -3.852714216  |
| H248 | -3.664840296 | 5.876631083  | -2.866129347  |
| H249 | -4.058724402 | 1.990161838  | -4.982159013  |
| H250 | -5.741815673 | 1.962905171  | -5.583417117  |
| H251 | 1.141022591  | 12.359829663 | -1.689858458  |
| H252 | -0.192048950 | 13.550057780 | -1.708953629  |
| H253 | 0.725670102  | 10.219610136 | -2.545633541  |
| H254 | -0.901518899 | 9.661124110  | -2.862404183  |
| H255 | -0.760745426 | 9.381002667  | -6.309930814  |
| H256 | -0.588800742 | 4.839589944  | -6.014670690  |
| H257 | -6.178248740 | 9.251714144  | -2.003227534  |
| H258 | -2.572411138 | 8.752690696  | 1.390659231   |
| H259 | -2.892238301 | 8.064129158  | -3.836582017  |
| H260 | 2.456720283  | 4.964358957  | -3.095117944  |
| H261 | 3.719981396  | 6.868453099  | -2.244318809  |
| H262 | -0.040137454 | 4.741400912  | -3.386543151  |
| H263 | -7.614740362 | 0.114222774  | -3.051303946  |
| H264 | 5.254839119  | 9.621862950  | -3.005013384  |
| H265 | -5.268455509 | -0.402951480 | -4.409741575  |
| H266 | 2.552360914  | 5.887575856  | -4.595452344  |
| H267 | -2.552407981 | 7.342577690  | -0.635000830  |
| H268 | -5.945034962 | 3.881045620  | -4.044498373  |
| H269 | 4.566353662  | 10.102517729 | -1.439647893  |
| H270 | -0.128582287 | 7.862751456  | -6.841200565  |
| H271 | -2.673570867 | 9.336088310  | -4.981335534  |

|      |              |               |              |
|------|--------------|---------------|--------------|
| H272 | -4.422328773 | -3.063909835  | -4.498439651 |
| H273 | -5.482281849 | -2.701079114  | -2.029036598 |
| H274 | -6.130634094 | 10.750003608  | -0.032274708 |
| H275 | -4.879390207 | 1.928291977   | -2.634995815 |
| H276 | 1.217284333  | 7.738003914   | -3.595852773 |
| H277 | 0.559130818  | 6.178307082   | -6.007933014 |
| H278 | 0.985837412  | 3.968503907   | -4.588386496 |
| H279 | -1.916478113 | 6.043643797   | -4.286680428 |
| H280 | 1.110253195  | 9.385687543   | 3.149456422  |
| H281 | 0.401190228  | 10.345931542  | 0.016635098  |
| H282 | 0.675051333  | 13.208259468  | 0.558996140  |
| H283 | 2.671838154  | 9.781954319   | 2.401242078  |
| H284 | -1.820258698 | 10.996462097  | 1.219490980  |
| H285 | 6.460304197  | -2.976367063  | -8.027497575 |
| H286 | 6.196058101  | -4.516604136  | -7.188843864 |
| H287 | 8.440173176  | -5.485540676  | -3.001390344 |
| H288 | 7.013118471  | -4.944784390  | -9.394123521 |
| H289 | 5.429305368  | -5.363207723  | -9.410160338 |
| H290 | 5.928983144  | 4.596354298   | 0.837936700  |
| H291 | 6.030299869  | 7.399190817   | 2.239539782  |
| H292 | 6.191185464  | 7.730631304   | -2.017360099 |
| H293 | 4.530869807  | 5.598809194   | 1.344460499  |
| H294 | 7.402255014  | 7.812611876   | 1.448095929  |
| H295 | 6.537716538  | 3.115018539   | -5.011010271 |
| H296 | 6.901508584  | 6.465934153   | -0.399156934 |
| H297 | 3.567506021  | -7.028112163  | 5.828283193  |
| H298 | 5.747913321  | -8.221508233  | 4.033923203  |
| H299 | 5.181491717  | 1.377889683   | -5.904119627 |
| H300 | 3.859167761  | -0.159694156  | 4.002034777  |
| H301 | 2.641468382  | 1.678666034   | -8.245975611 |
| H302 | -0.364038419 | -2.271081478  | -4.432108606 |
| H303 | 1.965272408  | 2.157386718   | -6.693070789 |
| H304 | 2.906552372  | -4.540515583  | 5.060562222  |
| H305 | 3.567688961  | 0.152865510   | -5.824657850 |
| H306 | 3.039484432  | -5.058077547  | 3.377426328  |
| H307 | 3.469386072  | -7.340271372  | 4.081135334  |
| H308 | 5.432554124  | -5.700968123  | 3.761868984  |
| H309 | 5.278667487  | -5.267076943  | 5.473434449  |
| H310 | -3.520521968 | -0.421330064  | -7.421106087 |
| H311 | 3.993818094  | -9.533914274  | 6.082085425  |
| H312 | 3.168581178  | -11.924658317 | 4.330281555  |
| H313 | 1.105546294  | -0.363197697  | -3.764526832 |
| H314 | 4.013116564  | -11.832138322 | 7.122685880  |
| H315 | 2.526384658  | -12.098712959 | 6.491268374  |
| H316 | 4.643779686  | -3.327045748  | 2.949366914  |
| H317 | 0.708087511  | 1.877948684   | -4.675052651 |
| H318 | -2.178898433 | -1.908444524  | -6.095386634 |
| H319 | 7.071654282  | -10.345546299 | 0.162307275  |
| H320 | 6.882994478  | -8.047410831  | -2.370885072 |
| H321 | 5.813203277  | -8.562258800  | 1.289856539  |
| H322 | 6.530587367  | -10.973744055 | -1.137336548 |
| H323 | 7.189666329  | 2.493526316   | -7.903662684 |
| H324 | 6.025537925  | -5.403366305  | 1.035839746  |
| H325 | 1.722393410  | -7.349837239  | 1.344196613  |
| H326 | 4.913598355  | -1.992587535  | -6.664438042 |
| H327 | 2.486390026  | -9.107726522  | -0.313626627 |
| H328 | 4.377949408  | -6.831756646  | -6.384879786 |
| H329 | 3.192793205  | -5.313636368  | -4.717902244 |
| H330 | 4.642280943  | -12.628489385 | 5.008928775  |
| H331 | 4.437503937  | -1.118877895  | 2.673955621  |
| H332 | 7.651216349  | -6.364072888  | 2.519851387  |

|       |              |               |              |
|-------|--------------|---------------|--------------|
| H333  | 6.922726604  | -4.181648904  | 1.367666627  |
| H334  | 7.666687089  | -7.390909877  | 4.678565643  |
| H335  | 3.168890167  | -2.807086487  | 6.177155206  |
| H336  | 2.738335844  | -11.636891550 | -3.252699512 |
| H337  | 3.663617319  | -8.220833371  | -2.999804353 |
| H338  | 4.672652056  | -8.586813142  | -1.586859323 |
| H339  | 1.598434099  | -8.477177271  | -1.731134615 |
| H340  | 2.747681960  | -2.034422335  | -5.614962344 |
| H341  | -1.112006373 | 2.260723589   | -6.370262481 |
| H342  | -3.273813062 | 1.342504688   | -7.408419743 |
| H343  | 1.664294355  | -5.647730939  | 0.777055343  |
| H344  | 7.608380539  | -7.914933084  | 2.401492276  |
| H345  | 6.225067931  | -9.697120606  | 2.270097824  |
| H346  | 2.701271474  | -1.189920688  | 5.805342163  |
| H347  | 6.546333833  | -7.808621076  | -5.417521956 |
| H348  | 6.607835671  | -6.483596359  | -1.602015007 |
| H349  | 2.082715387  | -2.790980393  | -7.094626383 |
| H350  | 5.800629196  | 4.263780059   | -6.155293104 |
| H351  | 6.031158982  | -0.593577055  | 5.844438434  |
| H352  | 6.667662082  | -0.140518643  | 4.244240184  |
| H353  | 9.871159254  | -6.897453345  | -4.196809542 |
| H354  | 9.039204202  | -8.251819629  | -3.811029754 |
| H355  | 9.886464620  | -9.317107599  | 0.498494740  |
| H356  | 8.449010072  | -8.665839959  | -1.146759166 |
| H357  | 11.770255756 | -8.232395922  | -1.164435141 |
| H358  | 9.754190436  | -7.647349323  | 1.097039540  |
| H359  | 9.289157241  | -0.749481271  | 5.071095536  |
| H360  | -2.767972412 | 13.281615785  | 3.317795706  |
| H361  | 8.188696442  | -7.490260463  | 7.642794272  |
| H362  | 8.114632760  | -5.023208273  | 6.427437351  |
| H363  | -4.106145447 | 12.617358664  | 0.665200416  |
| H364  | -3.723487748 | 10.442129573  | 2.813124834  |
| H365  | -5.276168350 | 11.133454199  | 2.302848688  |
| H366  | -5.160997221 | 7.507249821   | -3.064062722 |
| H367  | 2.538641965  | -1.240217740  | 0.153478901  |
| H368  | 0.315354500  | -1.168422822  | 0.175203344  |
| H369  | -0.847558000 | 0.350726554   | -1.028619279 |
| Mo370 | 4.016212687  | -4.431229602  | -1.612898587 |
| N371  | -6.832093263 | -6.517182136  | -2.351670422 |
| N372  | -9.121189185 | -3.942677920  | -0.903163409 |
| N373  | -9.635575855 | -4.329751553  | 1.865699277  |
| N374  | -7.314075343 | -5.637251948  | 2.743446110  |
| N375  | -5.321414956 | -3.628081974  | 2.250940628  |
| N376  | -6.241812811 | -1.631327499  | 4.065763239  |
| N377  | -6.329074221 | -2.974826793  | 6.632313524  |
| N378  | -3.917763539 | -4.505987366  | 6.984290919  |
| N379  | -1.739192294 | -3.024846876  | 6.110947124  |
| N380  | -1.925274168 | -0.073057426  | 6.437496001  |
| N381  | -3.283423257 | -0.016843984  | 9.007210374  |
| N382  | 3.369894426  | -11.533222967 | 6.386596444  |
| N383  | 4.591604098  | -9.426294690  | 5.255460878  |
| N384  | 4.144994612  | -3.353320198  | 3.843800784  |
| N385  | 3.043972918  | -2.086920307  | 5.473177545  |
| N386  | 3.863394945  | -1.069875928  | 3.544559404  |
| N387  | 7.470205375  | -7.477485688  | 5.699287742  |
| N388  | -5.143844354 | -2.412234498  | -4.138553757 |
| N389  | -1.317093187 | -5.177356921  | -3.524258108 |
| N390  | -5.370246691 | 0.130354587   | -3.530213764 |
| N391  | -7.862161286 | 1.072492506   | -2.816053927 |
| N392  | -7.821893714 | 0.918498265   | -0.054782500 |
| N393  | -5.657409633 | 2.453047527   | 0.957331141  |

|      |              |               |               |
|------|--------------|---------------|---------------|
| N394 | -2.373485594 | 3.039265984   | -1.689133747  |
| N395 | -1.487019367 | 1.188543267   | -1.011820424  |
| N396 | -6.352792634 | 5.104743557   | 1.354354947   |
| N397 | -9.060998805 | 8.312011247   | -0.851242102  |
| N398 | -9.221941604 | 10.085907254  | 0.471293046   |
| N399 | 8.468564457  | 1.686027370   | 5.159710747   |
| N400 | 6.749270609  | 7.039036634   | 1.603434648   |
| N401 | 5.475279750  | 8.216546081   | -1.483973766  |
| N402 | 3.027211012  | 7.532020492   | -2.624198849  |
| N403 | -1.215751954 | 6.486116786   | -4.908741138  |
| N404 | -0.618294870 | 8.392919855   | -6.129074632  |
| N405 | -2.286813159 | 8.512913270   | -4.527667338  |
| N406 | 1.373460937  | 6.442429123   | -0.564668006  |
| N407 | 1.419727836  | 8.586248346   | 1.239351325   |
| N408 | 0.406840602  | 11.156372394  | 0.637492625   |
| N409 | -0.287436552 | 10.369269190  | -2.461301500  |
| N410 | -2.183620457 | 11.945296689  | 1.181659296   |
| N411 | 6.065516525  | -4.562062285  | -9.356886397  |
| N412 | 4.139693372  | -2.500519920  | -7.103703841  |
| N413 | 3.055981905  | 0.350246625   | -6.707794059  |
| N414 | 5.122697575  | 2.305605042   | -6.341756452  |
| N415 | 0.601510703  | -2.719911035  | -10.250866289 |
| N416 | -1.202310552 | -0.823090250  | -9.065839426  |
| N417 | 8.929330831  | -7.251642205  | -4.006012077  |
| N418 | 4.839653049  | -5.788575426  | -3.416650144  |
| N419 | 4.735288309  | -6.622725260  | -5.456786970  |
| N420 | 9.180341936  | -7.990094833  | -0.928074233  |
| O421 | -7.057723050 | -4.610660923  | -0.210876183  |
| O422 | -8.510345906 | -2.392600107  | 2.282963083   |
| O423 | -7.780670245 | -4.969587527  | 4.879597314   |
| O424 | -4.245725050 | -4.475410991  | 4.067250974   |
| O425 | -4.085440906 | -0.924499249  | 4.239107084   |
| O426 | -5.658765381 | -0.973218727  | 7.505197141   |
| O427 | -4.213998079 | -4.316102989  | 9.253273620   |
| O428 | -0.258658907 | -4.641453021  | 6.806870557   |
| O429 | 0.253360891  | -0.410103765  | 7.043106725   |
| O430 | -1.637404494 | 1.434669640   | 9.590728211   |
| O431 | -2.319863133 | -0.526438485  | 12.419704091  |
| O432 | 5.484453653  | -10.688554793 | 3.533898993   |
| O433 | 5.907915264  | -7.967602200  | 7.314260984   |
| O434 | 10.032792975 | -5.351721622  | 7.040885170   |
| O435 | -5.328525184 | -0.197676862  | -1.260823471  |
| O436 | -2.935616930 | -4.114612911  | -4.719375809  |
| O437 | -7.143261394 | 3.244866433   | -2.840250197  |
| O438 | -5.136318698 | 3.701101253   | -4.592150608  |
| O439 | -9.912228491 | 1.868710438   | 0.080138384   |
| O440 | -6.433176929 | 2.163517594   | 3.083822275   |
| O441 | -4.640280635 | 5.338594574   | 2.848821644   |
| O442 | -7.342214770 | 7.555439184   | 3.716401404   |
| O443 | 8.660855833  | -1.392430490  | 6.905839252   |
| O444 | 2.741662589  | 4.560237677   | 4.881741620   |
| O445 | 4.343109141  | 8.358644097   | 0.488779277   |
| O446 | 2.499067250  | 9.748822849   | -2.937599930  |
| O447 | -0.417917503 | 7.114477138   | -1.826598746  |
| O448 | -0.509783143 | 7.818451364   | 2.210288895   |
| O449 | 2.253388581  | 5.734994195   | 2.283543604   |
| O450 | 1.226008247  | 11.994928280  | 2.603774365   |
| O451 | -1.784509778 | 14.077148772  | 0.478859923   |
| O452 | -2.065750256 | 11.776955720  | -2.190416117  |
| O453 | -4.668161513 | 13.884017780  | 2.871867522   |
| O454 | -4.328024506 | 7.387746360   | -2.567995139  |

|  |                     |              |               |              |
|--|---------------------|--------------|---------------|--------------|
|  | O455                | 3.518571943  | -4.375070373  | -8.277726913 |
|  | O456                | 1.725154673  | -0.586039199  | -8.320529608 |
|  | O457                | 3.821489407  | 3.870433019   | -7.387496325 |
|  | O458                | 8.454636927  | 3.643672123   | -6.786951228 |
|  | O459                | -2.863500158 | -2.177116860  | -9.849685811 |
|  | O460                | -0.270526474 | -6.301755479  | -6.250053932 |
|  | O461                | 1.798865914  | -5.574974759  | -6.656774396 |
|  | O462                | -1.725863740 | 2.697534333   | -8.912248420 |
|  | O463                | 10.173218621 | -5.980998232  | -1.261110416 |
|  | O464                | 12.344550270 | -7.838709192  | 0.754083255  |
|  | O465                | -0.467322868 | -6.031085880  | -0.694270006 |
|  | O466                | -0.394962330 | -8.116984955  | 0.076984112  |
|  | O467                | 4.669864097  | -11.041363951 | -2.184971258 |
|  | O468                | 2.621642689  | -10.681032746 | -3.065547025 |
|  | O469                | 4.879452344  | -6.021807439  | -0.256650697 |
|  | O470                | 4.284116682  | -7.742547213  | 1.071772897  |
|  | O471                | 2.624285730  | -6.015890058  | -1.605384676 |
|  | O472                | 8.039155173  | -7.184231554  | 2.919362561  |
|  | O473                | 6.610615124  | -5.027658447  | 1.743037607  |
|  | O474                | -3.184371326 | 5.141352904   | -3.318111107 |
|  | O475                | 7.346703338  | -10.916348594 | -0.599157272 |
|  | O476                | 6.590384832  | -9.139741450  | 1.533955330  |
|  | S477                | 4.309049070  | 4.903716643   | -0.961879539 |
|  | S478                | 2.717004140  | 1.849666581   | -2.676374210 |
|  | S479                | 2.690223312  | -3.176367424  | -3.141819896 |
|  | S480                | 3.295116289  | 1.479221908   | 0.800879357  |
|  | S481                | 0.598177796  | -1.112972118  | -1.153729446 |
|  | S482                | 5.254933125  | -0.618597775  | -4.468745910 |
|  | S483                | 3.317782597  | -3.505792366  | 0.466370402  |
|  | S484                | 6.126693929  | 1.703012781   | -1.518476634 |
|  | S485                | 6.175703393  | -3.398219770  | -1.868721763 |
|  | S486                | 6.170229434  | -1.180879282  | 1.224103347  |
|  | <b>15(b)</b>        |              |               |              |
|  | Fe( 139)            | 0.578        | -2.646        |              |
|  | Fe( 140)            | 0.369        | 1.055         |              |
|  | Fe( 141)            | 0.544        | -2.650        |              |
|  | Fe( 142)            | 0.579        | 2.807         |              |
|  | Fe( 143)            | 0.596        | 3.172         |              |
|  | Fe( 144)            | 0.490        | 1.629         |              |
|  | Fe( 145)            | 0.345        | -0.777        |              |
|  | <b>S=3/2</b>        |              |               |              |
|  | bm2cnx2b2635u.car_3 |              |               |              |
|  | C1                  | -5.813186058 | -7.371631562  | 0.549776816  |
|  | C2                  | -5.534571916 | -8.573154541  | -0.359707288 |
|  | C3                  | -7.518584057 | -5.852643516  | 1.454107509  |
|  | C4                  | -7.154952998 | -5.914184528  | 2.937194601  |
|  | C5                  | -6.852465198 | -7.298350442  | 4.928248565  |
|  | C6                  | -5.374605023 | -7.031080781  | 5.231561141  |
|  | C7                  | -3.084074560 | -7.041129352  | 4.359815102  |
|  | C8                  | -2.790868964 | -5.542464689  | 4.247022295  |
|  | C9                  | -3.282915008 | -3.434402302  | 3.124351678  |
|  | C10                 | -3.767492788 | -2.630396296  | 4.340467007  |
|  | C11                 | -5.405239758 | -2.386809933  | 6.121481832  |
|  | C12                 | -4.608259702 | -2.663668980  | 7.403883611  |
|  | C13                 | -3.712746855 | -4.362496053  | 8.923807311  |
|  | C14                 | -2.184481804 | -4.282474402  | 9.029231983  |
|  | C15                 | -0.034160904 | -4.579525602  | 7.871762514  |
|  | C16                 | 0.713787757  | -3.413089772  | 7.221754445  |
|  | C17                 | 0.476873170  | -1.335425509  | 5.885865014  |
|  | C18                 | 0.055284508  | -0.017658767  | 6.562587621  |
|  | C19                 | 0.141874813  | -1.398605989  | 4.371344987  |
|  | C20                 | 0.556267351  | -0.120821728  | 3.633342216  |
|  | C21                 | 0.786181949  | -2.633560199  | 3.731220861  |
|  | C22                 | -1.792111499 | 1.460785678   | 7.253496095  |
|  | C23                 | -1.804820927 | 1.330290404   | 8.789495025  |
|  | C24                 | -3.173871420 | 1.856398158   | 6.677982076  |
|  | C25                 | -3.770697095 | 3.043717411   | 7.444914224  |
|  | C26                 | -3.067332913 | 2.182139769   | 5.183237345  |
|  | C27                 | -2.486086347 | 0.070782358   | 10.747869556 |



|     |               |              |              |
|-----|---------------|--------------|--------------|
| C28 | -1.141291160  | 0.193245324  | 11.438295760 |
| C29 | 8.355325352   | -8.726359932 | 5.861735180  |
| C30 | 8.605736008   | -7.416393222 | 5.115862949  |
| C31 | 8.176901963   | -4.958654418 | 5.226442624  |
| C32 | 9.081431599   | -4.163921558 | 6.186749474  |
| C33 | 6.777284917   | -4.327444385 | 5.115504095  |
| C34 | 6.798328681   | -2.881826580 | 4.609067101  |
| C35 | 5.390982771   | -2.409890199 | 4.250230434  |
| C36 | 4.557420472   | -0.065019894 | 4.002843996  |
| C37 | 11.012024345  | -2.668174472 | 6.356349677  |
| C38 | 10.833546910  | -1.170509460 | 6.230676421  |
| C39 | -3.968335738  | -4.088684652 | -1.834173047 |
| C40 | -4.808604946  | -2.812057635 | -1.661309675 |
| C41 | -2.483431204  | -3.703414358 | -1.641906077 |
| C42 | -1.492679135  | -4.874726203 | -1.474500565 |
| C43 | -0.895135769  | -5.407865233 | -2.776005501 |
| C44 | -5.989913734  | -1.049325762 | -2.894742064 |
| C45 | -7.440459551  | -1.034998157 | -2.390750909 |
| C46 | -5.894806584  | -0.429944170 | -4.302906972 |
| C47 | -9.144150901  | -2.251156376 | -1.109674854 |
| C48 | -8.926857718  | -1.968622742 | 0.385444740  |
| C49 | -7.295565855  | -1.644595776 | 2.200082913  |
| C50 | -6.632535410  | -0.290385841 | 2.460770351  |
| C51 | -5.463158202  | 1.680510130  | 1.594546644  |
| C52 | -6.460692650  | 2.749519299  | 2.095155486  |
| C53 | -4.900736673  | 2.259485083  | 0.287137810  |
| C54 | -3.777909946  | 1.528467595  | -0.374736909 |
| C55 | -2.806909049  | 0.668472271  | 0.077455907  |
| C56 | -2.406592727  | 1.064226216  | -2.069220696 |
| C57 | -8.680959629  | 3.725731604  | 1.668357320  |
| C58 | -8.989625926  | 3.967132568  | 3.144315395  |
| C59 | -9.953791911  | 3.281060599  | 0.909110312  |
| C60 | -10.912437044 | 4.367219832  | 0.519607936  |
| C61 | -11.373085591 | 5.461138700  | 1.227596393  |
| C62 | -12.285384588 | 5.406895004  | -0.791143541 |
| C63 | 7.380574875   | 4.230266184  | 4.828506652  |
| C64 | 8.630347003   | 3.373357926  | 4.914470089  |
| C65 | 6.229727988   | 3.291543157  | 4.382931412  |
| C66 | 4.895962174   | 3.994412517  | 4.292596869  |
| C67 | 4.051279483   | 4.094128345  | 5.413882014  |
| C68 | 4.462166847   | 4.575166461  | 3.086948410  |
| C69 | 2.817234909   | 4.748683038  | 5.339407401  |
| C70 | 3.238333860   | 5.240291032  | 2.999381144  |
| C71 | 2.415834213   | 5.323278351  | 4.126615145  |
| C72 | 3.265761985   | 8.412945348  | -1.198709956 |
| C73 | 1.990037123   | 9.063520060  | -1.747491936 |
| C74 | 2.971133359   | 6.975841376  | -0.744956726 |
| C75 | 0.843862775   | 9.930597034  | -3.742946104 |
| C76 | -0.343579994  | 8.994756630  | -3.979617420 |
| C77 | -1.146299876  | 6.654162510  | -3.940331496 |
| C78 | -1.845858959  | 6.370453160  | -2.591269764 |
| C79 | -0.533001698  | 5.395615754  | -4.582857218 |
| C80 | -1.460821377  | 4.206394065  | -4.844447409 |
| C81 | -2.521189006  | 4.375676259  | -5.944557529 |
| C82 | -4.499838017  | 5.898539331  | -5.871035820 |
| C83 | -1.675258909  | 6.146274422  | -0.169655000 |
| C84 | -2.256839898  | 7.425326372  | 0.465054959  |
| C85 | -0.707242837  | 5.508109010  | 0.838000324  |
| C86 | -1.879328734  | 9.807450829  | 0.878229392  |
| C87 | -2.887853085  | 10.845854333 | 0.396144082  |
| C88 | -4.521603431  | 11.518398735 | -1.312215983 |

|       |              |              |              |
|-------|--------------|--------------|--------------|
| C89   | -5.950148684 | 11.514130933 | -0.727504861 |
| C90   | -4.557854729 | 11.391913823 | -2.850943334 |
| C91   | -5.139519181 | 10.058421746 | -3.306079390 |
| C92   | -7.625547708 | 10.263540060 | 0.559307935  |
| C93   | -7.982233088 | 11.336375526 | 1.583080873  |
| C94   | -7.759390126 | 8.858441971  | 1.203433452  |
| C95   | -7.555431538 | 7.750622158  | 0.194760537  |
| C96   | -8.620596803 | 7.327865746  | -0.615603675 |
| C97   | -6.297038252 | 7.159101496  | 0.002174513  |
| C98   | -8.436751044 | 6.361795284  | -1.605896116 |
| C99   | -6.087369432 | 6.205915936  | -0.999427890 |
| C100  | -7.163917812 | 5.823521947  | -1.796419211 |
| C101  | 6.281740877  | -2.729912834 | -8.236414137 |
| C102  | 4.822999912  | -2.946277024 | -7.867992386 |
| C103  | 2.841329348  | -1.928419750 | -6.764461812 |
| C104  | 1.976517314  | -0.880961677 | -7.473124149 |
| C105  | 1.444735574  | 1.503901202  | -7.624810677 |
| C106  | 2.156520877  | 2.851626241  | -7.679636204 |
| C107  | 4.089388038  | 4.231012014  | -7.077434749 |
| C108  | 5.161617033  | 4.386542463  | -8.136071858 |
| C109  | -0.181177188 | -4.610394329 | -9.061631661 |
| C110  | -1.538544365 | -3.906015419 | -8.961351254 |
| C111  | 0.292772915  | -5.005285969 | -7.643216826 |
| C112  | 1.429883207  | -6.041941679 | -7.696184493 |
| C113  | 2.072816486  | -6.188136303 | -6.335468145 |
| C114  | -2.748296112 | -1.833793536 | -8.485872945 |
| C115  | -2.650762431 | -0.481664205 | -9.164863606 |
| C116  | -3.274300021 | -1.798685419 | -7.030581405 |
| C117  | -2.207948436 | -1.381152917 | -6.053347417 |
| C118  | -1.901583217 | -0.025246954 | -5.846935795 |
| C119  | -1.419576950 | -2.354525929 | -5.413861955 |
| C120  | -0.797642117 | 0.335823303  | -5.069795002 |
| C121  | -0.315666887 | -1.991314893 | -4.636930211 |
| C122  | 0.010778949  | -0.640976174 | -4.480143104 |
| C123  | 10.011900015 | -3.531387170 | -3.035847015 |
| C124  | 11.022831263 | -3.251674026 | -1.913160011 |
| C125  | 8.845247620  | -4.420427551 | -2.577965363 |
| C126  | 7.730973520  | -4.595700182 | -3.565503261 |
| C127  | 7.768103711  | -5.296435297 | -4.754702771 |
| C128  | 5.693563606  | -4.632791106 | -4.355288186 |
| C129  | 12.348992062 | -4.060707970 | -0.042247907 |
| C130  | 13.630445232 | -3.442880872 | -0.557483417 |
| C131  | 2.712405925  | -6.331465684 | 0.645288777  |
| C132  | 3.975958288  | -5.598064175 | 1.001786205  |
| C133  | 5.045596884  | -5.609608882 | -0.166224849 |
| C134  | 5.402223798  | -7.083311141 | -0.521199265 |
| C135  | 6.566123671  | -7.182042342 | -1.521583764 |
| C136  | 7.122365920  | -8.568965314 | -1.683304403 |
| C137  | 6.338216826  | -4.963128633 | 0.418272750  |
| C138  | 4.019689791  | 0.393630459  | -1.757355326 |
| Fe139 | 4.812353034  | -0.730627340 | -3.185771546 |
| Fe140 | 2.272710615  | 0.959233126  | -1.176301981 |
| Fe141 | 4.645156569  | 2.005374728  | -0.705008888 |
| Fe142 | 3.757356449  | 1.702281043  | -3.191711871 |
| Fe143 | 2.842188820  | 3.713290298  | -1.652678102 |
| Fe144 | 5.471793724  | -0.433008355 | -0.677801260 |
| Fe145 | 3.119163545  | -1.278937702 | -1.189247181 |
| H146  | -3.564300453 | -8.801252468 | 0.115415818  |
| H147  | -3.803099565 | -8.018341524 | -1.296640592 |
| H148  | -7.817362260 | -7.474879630 | 0.093622958  |
| H149  | -6.146075058 | -8.486554168 | -1.271556248 |

|      |              |              |               |
|------|--------------|--------------|---------------|
| H150 | -5.913017622 | -9.462102321 | 0.173784183   |
| H151 | -7.047030371 | -4.940920193 | 1.059534429   |
| H152 | -7.475541086 | -7.942378926 | 2.971868784   |
| H153 | -8.608263520 | -5.739693020 | 1.370091794   |
| H154 | -7.093002876 | -8.326603601 | 5.227994998   |
| H155 | -4.864382099 | -7.615049912 | 3.332615074   |
| H156 | -7.435962197 | -6.610669718 | 5.554199751   |
| H157 | -2.223375562 | -3.181465016 | 2.983427844   |
| H158 | -4.047484488 | -5.381398285 | 2.611675370   |
| H159 | -2.545043452 | -7.577298818 | 3.567286615   |
| H160 | -5.384530835 | -1.302469017 | 5.953712468   |
| H161 | -5.421481841 | -3.859463008 | 4.549000648   |
| H162 | -2.695702760 | -7.373423438 | 5.329767340   |
| H163 | -3.832920390 | -3.110901440 | 2.228587034   |
| H164 | -4.638621762 | -4.702135417 | 7.031417082   |
| H165 | -6.448432868 | -2.695769929 | 6.278704466   |
| H166 | 0.461121559  | -3.563609594 | 4.219789568   |
| H167 | 0.512148394  | -2.698754365 | 2.666633062   |
| H168 | 1.885081042  | -2.578917030 | 3.785376831   |
| H169 | -0.952634527 | -1.495886832 | 4.287564073   |
| H170 | -3.999978440 | -5.406091820 | 9.120742368   |
| H171 | -2.713760720 | 1.324461202  | 4.593543233   |
| H172 | -2.866959357 | -0.461960432 | 8.716569059   |
| H173 | -3.950649721 | 2.805621918  | 8.503675966   |
| H174 | 0.245638682  | -0.177147885 | 2.579098894   |
| H175 | 1.646470460  | 0.017558498  | 3.636541271   |
| H176 | 7.152871052  | 4.592667923  | 5.849238912   |
| H177 | -4.049575773 | 2.482671939  | 4.790927749   |
| H178 | -4.729821150 | 3.336538672  | 6.992677097   |
| H179 | -2.370003370 | 3.020475602  | 5.023826485   |
| H180 | -3.097056440 | 3.914979815  | 7.404357339   |
| H181 | -3.852075223 | 0.992793725  | 6.804735652   |
| H182 | -1.077450204 | 2.272616730  | 7.051192948   |
| H183 | -1.941966007 | -0.364014909 | 6.125051093   |
| H184 | 0.094372585  | 0.779790385  | 4.065097701   |
| H185 | -0.189238345 | 4.664329188  | 0.347259237   |
| H186 | -1.314306988 | 5.118499699  | 1.670903133   |
| H187 | 0.490468719  | 6.239450292  | 2.217144569   |
| H188 | 0.713072021  | 5.948686349  | 4.821459205   |
| H189 | 2.906898053  | 5.670135356  | 2.053169345   |
| H190 | 5.077507866  | 4.483847545  | 2.189081599   |
| H191 | 4.357836714  | 3.646036073  | 6.363437333   |
| H192 | -1.065470005 | -2.653555576 | 6.586534697   |
| H193 | 0.281088944  | -5.493208893 | 7.346655733   |
| H194 | 0.312617650  | -4.653406426 | 8.910112518   |
| H195 | -1.972609673 | -4.760776093 | 7.017296349   |
| H196 | -4.110475534 | -3.737671308 | 9.733957186   |
| H197 | 2.165500384  | 4.800593650  | 6.216375874   |
| H198 | 1.565504743  | -1.386559318 | 6.018097625   |
| H199 | -3.181790899 | 0.799157772  | 11.194997822  |
| H200 | -2.868463139 | -0.940265938 | 10.957497103  |
| H201 | -0.261671596 | -0.083261874 | 10.810675814  |
| H202 | 12.044310960 | -2.937533441 | 6.085796866   |
| H203 | 0.849532656  | -6.145142761 | -3.563210349  |
| H204 | 3.445443713  | -7.892977522 | 1.512845488   |
| H205 | 1.018470564  | -7.016606935 | -7.995366538  |
| H206 | 2.181067799  | -5.738845744 | -8.439456346  |
| H207 | -0.545370305 | -5.421212355 | -7.062808970  |
| H208 | -1.977059934 | -0.465656233 | -10.053566366 |
| H209 | -0.407000115 | -5.538361815 | -9.608697275  |
| H210 | -2.174771857 | -3.071536635 | -2.490172292  |

|      |               |              |               |
|------|---------------|--------------|---------------|
| H211 | -1.984835926  | -5.724655901 | -0.969825579  |
| H212 | -0.617637768  | -2.103313660 | -8.497041979  |
| H213 | -3.501570050  | -2.379209813 | -9.091444720  |
| H214 | 1.145072700   | -3.041905924 | -9.358362107  |
| H215 | 0.956604072   | -5.663105900 | -1.870638410  |
| H216 | 0.618638439   | -4.095253254 | -7.115960440  |
| H217 | 1.563738513   | -4.436124959 | -10.125965811 |
| H218 | -4.895650276  | -5.451680765 | -3.082069843  |
| H219 | -2.424854027  | -3.076956243 | -0.740585207  |
| H220 | 3.507492298   | -4.993666553 | -6.958658191  |
| H221 | -0.679195302  | -4.557512061 | -0.807294265  |
| H222 | -4.678705949  | 1.601817250  | 2.361148042   |
| H223 | -2.631167507  | 0.236979788  | 1.057270817   |
| H224 | -8.223584292  | -1.653332943 | 2.785392879   |
| H225 | -6.866404788  | -2.151816924 | 0.172672761   |
| H226 | -7.932138457  | 1.830624681  | 1.001649445   |
| H227 | -11.154217952 | 5.834615348  | 2.221481997   |
| H228 | -8.972818602  | 3.039417820  | 3.765724090   |
| H229 | -10.462742048 | 2.495600040  | 1.495479850   |
| H230 | -8.287170464  | 4.659100659  | 1.233743547   |
| H231 | -12.902292625 | 5.708646085  | -1.634373054  |
| H232 | -4.560913899  | 3.282606634  | 0.517769645   |
| H233 | -5.727054527  | 2.368334725  | -0.433785568  |
| H234 | -12.751172321 | 6.964457252  | 0.582975293   |
| H235 | -9.627107600  | 2.805648889  | -0.029102455  |
| H236 | -5.928947740  | -0.129289044 | 0.523269919   |
| H237 | -6.648796341  | -2.430418252 | 2.617885891   |
| H238 | -9.862344759  | -1.505580136 | -1.473288214  |
| H239 | -1.933681848  | 1.033483248  | -3.046125810  |
| H240 | -9.607348982  | -3.241912927 | -1.212910378  |
| H241 | 8.195532240   | 6.018808666  | 4.242946398   |
| H242 | 6.706982993   | 5.742621350  | 3.621806681   |
| H243 | -0.028725524  | 6.315435381  | -1.569955689  |
| H244 | -2.525294186  | 5.461180618  | -0.303349079  |
| H245 | -0.844194062  | 8.572769927  | -0.486114503  |
| H246 | -4.074955060  | 2.363538002  | -2.366136813  |
| H247 | -5.543990052  | 2.368826983  | -3.870663898  |
| H248 | -5.761130003  | 3.726665088  | -3.072120248  |
| H249 | -4.840976632  | -0.396592046 | -4.610747072  |
| H250 | -6.451534248  | -1.048848375 | -5.026945752  |
| H251 | -3.538797283  | 11.544757492 | -3.235958974  |
| H252 | -5.201806157  | 12.196299916 | -3.230707299  |
| H253 | -3.233440328  | 9.295373696  | -3.794093190  |
| H254 | -4.580862353  | 8.178817295  | -3.871837034  |
| H255 | -4.661886840  | 7.401988388  | -7.252670546  |
| H256 | -2.693450715  | 3.412063606  | -6.446859287  |
| H257 | -9.278187166  | 6.030432201  | -2.220068124  |
| H258 | -5.448593973  | 7.433388378  | 0.636406019   |
| H259 | -5.881995590  | 5.833811646  | -4.343640032  |
| H260 | 0.288426809   | 5.036341246  | -3.943066331  |
| H261 | 0.811183043   | 7.365908446  | -3.476421920  |
| H262 | -1.940637759  | 3.877163884  | -3.909029268  |
| H263 | -7.373472209  | -3.033459267 | -2.035305367  |
| H264 | 1.162752172   | 10.328744465 | -4.715945858  |
| H265 | -5.113219231  | -2.934479676 | -3.634644939  |
| H266 | -0.074229013  | 5.709567241  | -5.535443126  |
| H267 | -5.087068041  | 5.807407847  | -1.184313852  |
| H268 | -7.204943676  | 0.886018932  | -3.720634018  |
| H269 | 0.464996479   | 10.770491400 | -3.143463054  |
| H270 | -3.526387602  | 6.163670675  | -7.665594774  |
| H271 | -6.280630159  | 6.872852295  | -5.658229458  |

|      |              |              |              |
|------|--------------|--------------|--------------|
| H272 | -3.330327861 | -5.070761480 | -3.528277435 |
| H273 | -4.258815240 | -4.746145411 | -0.993040306 |
| H274 | -9.614495227 | 7.757931077  | -0.471450032 |
| H275 | -5.465700510 | -0.372987400 | -2.197178559 |
| H276 | -1.932085711 | 7.067317980  | -4.586580000 |
| H277 | -2.151659505 | 5.069003848  | -6.710468984 |
| H278 | -0.804765966 | 3.381737590  | -5.154282378 |
| H279 | -4.238779449 | 4.282758086  | -4.678101959 |
| H280 | -2.186751068 | 9.518590572  | 1.894198753  |
| H281 | -3.383815138 | 9.684403588  | -1.222832349 |
| H282 | -4.119444605 | 12.512181208 | -1.066312827 |
| H283 | -0.911453357 | 10.322395352 | 0.953371349  |
| H284 | -5.578587702 | 9.730327595  | 0.191500712  |
| H285 | 6.472529334  | -1.660132012 | -8.403461800 |
| H286 | 6.865655105  | -3.022678115 | -7.339020140 |
| H287 | 9.611535384  | -2.548329589 | -3.321388997 |
| H288 | 7.633480159  | -3.523771656 | -9.540520995 |
| H289 | 6.301583713  | -4.452635873 | -9.318693853 |
| H290 | 3.918381198  | 6.511893635  | -0.438869995 |
| H291 | 3.067564958  | 9.315558331  | 0.618760498  |
| H292 | 2.795707601  | 9.065966588  | -3.638646995 |
| H293 | 2.282131340  | 7.000740290  | 0.110913618  |
| H294 | 4.099057898  | 10.100570885 | -0.378486703 |
| H295 | 4.535519848  | 4.376092211  | -6.081554381 |
| H296 | 4.028689323  | 8.386917673  | -1.992770183 |
| H297 | 6.280909907  | -4.379990544 | 6.099452878  |
| H298 | 8.632932878  | -4.994487898 | 4.229957163  |
| H299 | 3.811410324  | 2.180872554  | -6.604455774 |
| H300 | 3.898452537  | 1.780756832  | 3.434557808  |
| H301 | 1.172136293  | 1.236391562  | -8.655101748 |
| H302 | 0.299902353  | -2.756626855 | -4.157333488 |
| H303 | 0.496361620  | 1.675447833  | -7.089745599 |
| H304 | 4.734150095  | -2.419893689 | 5.129769502  |
| H305 | 2.768545671  | 0.513229448  | -6.209106599 |
| H306 | 4.945759314  | -3.097508145 | 3.512042171  |
| H307 | 6.198065231  | -4.956028573 | 4.419710018  |
| H308 | 7.426695088  | -2.806701255 | 3.708926371  |
| H309 | 7.230017636  | -2.207956314 | 5.366540688  |
| H310 | -3.638976094 | -2.807481543 | -6.789963052 |
| H311 | 7.630425783  | -6.515615339 | 6.612148532  |
| H312 | 7.624358481  | -9.283669034 | 5.255670176  |
| H313 | 0.881020248  | -0.329034946 | -3.899657230 |
| H314 | 8.582055779  | -8.479449214 | 7.893739238  |
| H315 | 7.251275718  | -9.341504087 | 7.484928913  |
| H316 | 5.781118497  | -1.000208664 | 2.713726646  |
| H317 | -0.533910522 | 1.384581927  | -4.915108342 |
| H318 | -1.667241475 | -3.411804661 | -5.533229088 |
| H319 | 10.388577892 | -7.041547144 | 0.501473611  |
| H320 | 9.239162337  | -5.423869365 | -2.336502581 |
| H321 | 8.641974186  | -5.679578375 | 1.546922803  |
| H322 | 10.034354879 | -8.011870601 | -0.643700715 |
| H323 | 5.104783624  | 3.660226088  | -8.982929655 |
| H324 | 7.681534603  | -2.738721849 | 0.872012334  |
| H325 | 4.435804026  | -6.010846544 | 1.912562119  |
| H326 | 4.768415913  | -1.093731440 | -6.991105996 |
| H327 | 5.677080949  | -7.605744429 | 0.408950527  |
| H328 | 6.151214852  | -5.770299614 | -6.078132022 |
| H329 | 4.623925591  | -4.519639597 | -4.471780411 |
| H330 | 9.300311231  | -9.294221612 | 5.819070502  |
| H331 | 4.730143624  | 0.900060177  | 2.184865695  |
| H332 | 9.608946750  | -2.810720346 | 2.294418675  |

|       |              |               |              |
|-------|--------------|---------------|--------------|
| H333  | 8.088372493  | -1.243826732  | 0.968085284  |
| H334  | 10.133999815 | -3.431693748  | 4.544361337  |
| H335  | 4.446803349  | -0.520672050  | 6.002461021  |
| H336  | 6.655568759  | -10.331136935 | -2.183742999 |
| H337  | 6.225307570  | -6.818490563  | -2.502338231 |
| H338  | 7.404998419  | -6.553070613  | -1.202706841 |
| H339  | 4.511585158  | -7.568191547  | -0.946189657 |
| H340  | 2.858454542  | -1.752784226  | -5.677354429 |
| H341  | -2.514050315 | 0.739701761   | -6.331616308 |
| H342  | -4.134543263 | -1.112125695  | -7.014291595 |
| H343  | 3.715313916  | -4.544298358  | 1.169367300  |
| H344  | 10.140397993 | -4.269804863  | 2.367395224  |
| H345  | 9.508472835  | -6.427768952  | 2.599594678  |
| H346  | 3.396405813  | 0.741346215   | 5.494423736  |
| H347  | 8.585859903  | -5.780398306  | -5.275050544 |
| H348  | 8.422447541  | -4.012289830  | -1.651471678 |
| H349  | 2.415848583  | -2.913980280  | -6.966566235 |
| H350  | 3.351882989  | 5.034887861   | -7.239962749 |
| H351  | 6.173641206  | 2.469802595   | 5.113071074  |
| H352  | 6.493203891  | 2.856662782   | 3.405258032  |
| H353  | 11.394612152 | -3.427607716  | -4.547661222 |
| H354  | 11.207077812 | -4.938637085  | -3.947775719 |
| H355  | 12.614669820 | -5.043599265  | 0.378983501  |
| H356  | 10.929940920 | -5.200104285  | -1.148706612 |
| H357  | 13.874437582 | -3.670262425  | -1.622817007 |
| H358  | 11.945265979 | -3.445478505  | 0.778376053  |
| H359  | 9.147236957  | 3.220184461   | 3.936995360  |
| H360  | -7.107875612 | 11.835179434  | 2.066391697  |
| H361  | 10.859876589 | -2.924046250  | 7.420125870  |
| H362  | 9.795427500  | -0.833493305  | 5.994618266  |
| H363  | -8.346758117 | 10.348579797  | -0.270639688 |
| H364  | -7.034494333 | 8.767171299   | 2.028077456  |
| H365  | -8.765198683 | 8.796472203   | 1.643676826  |
| H366  | -7.774812811 | 4.649290803   | -3.231197612 |
| H367  | 2.733027634  | -0.177217084  | -0.005168127 |
| H368  | 0.707950140  | -1.023947024  | 0.245820767  |
| H369  | -1.088008303 | -0.158438858  | -1.006986548 |
| Mo370 | 5.267886997  | -2.947365250  | -1.606377719 |
| N371  | -4.146477797 | -8.794530993  | -0.725858687 |
| N372  | -7.123293847 | -7.024512259  | 0.685864670  |
| N373  | -7.201530025 | -7.134497291  | 3.525750662  |
| N374  | -4.498964433 | -7.362755248  | 4.250095517  |
| N375  | -3.455296382 | -4.872229076  | 3.269715290  |
| N376  | -4.893798304 | -3.079191511  | 4.947936944  |
| N377  | -4.307557214 | -3.963530700  | 7.657452411  |
| N378  | -1.484702800 | -4.495687708  | 7.878404425  |
| N379  | -0.062236946 | -2.483243122  | 6.607189467  |
| N380  | -1.282007916 | 0.247761799   | 6.609278370  |
| N381  | -2.378752496 | 0.214464705   | 9.307446088  |
| N382  | 7.819972488  | -8.537919051  | 7.214688416  |
| N383  | 8.074376824  | -6.329399729  | 5.706667296  |
| N384  | 5.383735015  | -1.065336316  | 3.655674845  |
| N385  | 3.991423330  | -0.040332415  | 5.232780251  |
| N386  | 4.246719021  | 0.881095057   | 3.109058103  |
| N387  | 10.050883533 | -3.431647513  | 5.584556235  |
| N388  | -4.217424838 | -4.690111410  | -3.148918298 |
| N389  | 0.401241623  | -5.768951186  | -2.722187436 |
| N390  | -5.337261317 | -2.339176641  | -2.819408673 |
| N391  | -7.940116043 | -2.196761408  | -1.917488902 |
| N392  | -7.633746891 | -1.948883219  | 0.821354754  |
| N393  | -6.110851213 | 0.385320951   | 1.384477307  |

|      |               |              |              |
|------|---------------|--------------|--------------|
| N394 | -3.503322049  | 1.751898090  | -1.718933726 |
| N395 | -1.981422997  | 0.397299327  | -0.995006948 |
| N396 | -7.699936617  | 2.655881126  | 1.549483701  |
| N397 | -11.489227459 | 4.345698626  | -0.740318958 |
| N398 | -12.242660479 | 6.109035920  | 0.376280987  |
| N399 | 7.598856206   | 5.290413295  | 3.842210527  |
| N400 | 3.819324665   | 9.167266507  | -0.062872622 |
| N401 | 1.988581259   | 9.336074907  | -3.083110238 |
| N402 | -0.106502996  | 7.673597533  | -3.833641341 |
| N403 | -3.813974379  | 4.846691320  | -5.434269551 |
| N404 | -4.127874782  | 6.587180071  | -6.967587020 |
| N405 | -5.558935838  | 6.357578616  | -5.159954555 |
| N406 | -1.066734638  | 6.367372394  | -1.476701942 |
| N407 | -1.704846319  | 8.609343844  | 0.069319173  |
| N408 | -3.627157024  | 10.532925095 | -0.710510451 |
| N409 | -4.229018305  | 9.103178110  | -3.626736231 |
| N410 | -6.275821447  | 10.457436579 | 0.055398090  |
| N411 | 6.616077710   | -3.486222712 | -9.446601269 |
| N412 | 4.210536755   | -1.907994199 | -7.265664652 |
| N413 | 2.165607736   | 0.384958349  | -7.046687173 |
| N414 | 3.400369217   | 2.955039265  | -7.142281893 |
| N415 | 0.767977520   | -3.844017963 | -9.878424293 |
| N416 | -1.512045130  | -2.575087716 | -8.666545664 |
| N417 | 10.691329140  | -4.095452981 | -4.219327539 |
| N418 | 6.419459704   | -4.180772073 | -3.335827189 |
| N419 | 6.476928327   | -5.304865881 | -5.235460904 |
| N420 | 11.378783552  | -4.285699379 | -1.100427872 |
| O421 | -4.914342874  | -6.778306285 | 1.175309383  |
| O422 | -6.853104853  | -4.881228706 | 3.556648715  |
| O423 | -5.024302455  | -6.566164987 | 6.328410189  |
| O424 | -1.997162121  | -4.976023158 | 5.014354229  |
| O425 | -3.161421715  | -1.617380697 | 4.724171026  |
| O426 | -4.302408856  | -1.738778794 | 8.176106256  |
| O427 | -1.655138820  | -4.081703968 | 10.129901059 |
| O428 | 1.952229201   | -3.380332919 | 7.261590802  |
| O429 | 0.906707742   | 0.749070268  | 7.037733763  |
| O430 | -1.322328127  | 2.212314974  | 9.518933070  |
| O431 | -1.017499325  | 0.506937870  | 12.613364775 |
| O432 | 9.242260956   | -7.430287777 | 4.040738876  |
| O433 | 8.902732189   | -4.217235834 | 7.416545289  |
| O434 | 11.742186604  | -0.370874099 | 6.392661163  |
| O435 | -4.985545889  | -2.256275538 | -0.554782275 |
| O436 | -1.574696435  | -5.517210265 | -3.822101249 |
| O437 | -8.071551962  | 0.042548454  | -2.376003055 |
| O438 | -6.403320869  | 0.912894189  | -4.307106341 |
| O439 | -9.909278567  | -1.786302658 | 1.114667550  |
| O440 | -6.602695478  | 0.173765381  | 3.603069409  |
| O441 | -6.103596915  | 3.678632762  | 2.824016953  |
| O442 | -9.276514400  | 5.052122741  | 3.621096566  |
| O443 | 9.045602847   | 2.861225741  | 5.944579650  |
| O444 | 1.208289685   | 5.978358171  | 3.982270723  |
| O445 | 1.021153112   | 9.346441043  | -1.019468633 |
| O446 | -1.442181837  | 9.482825474  | -4.316605037 |
| O447 | -3.075053984  | 6.174531552  | -2.565143439 |
| O448 | -3.148099603  | 7.344965765  | 1.322200250  |
| O449 | 0.226441907   | 6.483976673  | 1.306646115  |
| O450 | -3.022663750  | 11.909254098 | 1.014606154  |
| O451 | -6.734922273  | 12.442121013 | -0.968143612 |
| O452 | -6.363725004  | 9.850091950  | -3.308003824 |
| O453 | -9.131702391  | 11.609427818 | 1.886779134  |
| O454 | -6.920205309  | 4.900464796  | -2.830053983 |

|      |              |              |              |
|------|--------------|--------------|--------------|
| O455 | 4.266857308  | -4.050200601 | -8.097664403 |
| O456 | 1.180974828  | -1.192464007 | -8.386952276 |
| O457 | 1.560575559  | 3.807283790  | -8.203896719 |
| O458 | 6.026837595  | 5.246457779  | -8.090252322 |
| O459 | -2.603577269 | -4.529117541 | -9.110482908 |
| O460 | 1.577620054  | -6.831508640 | -5.414644754 |
| O461 | 3.227124011  | -5.518530738 | -6.144854052 |
| O462 | -3.278512278 | 0.512196644  | -8.828683083 |
| O463 | 11.572893928 | -2.140778616 | -1.798801093 |
| O464 | 14.400213360 | -2.806764649 | 0.149240771  |
| O465 | 1.764276281  | -5.856845158 | 0.035285412  |
| O466 | 2.633705852  | -7.646537689 | 1.028999979  |
| O467 | 8.286761307  | -8.899274379 | -1.471512485 |
| O468 | 6.196026071  | -9.467472998 | -2.108528033 |
| O469 | 6.750109493  | -3.898863536 | -0.192374764 |
| O470 | 6.931318650  | -5.495953081 | 1.384246734  |
| O471 | 4.576117106  | -4.915284806 | -1.259886280 |
| O472 | 10.298117120 | -3.363521945 | 2.743006563  |
| O473 | 8.111072206  | -2.078222841 | 1.474274487  |
| O474 | -5.063260218 | 3.157099610  | -3.485290001 |
| O475 | 10.803188578 | -7.578610539 | -0.219851114 |
| O476 | 9.592734805  | -5.891266793 | 1.768738476  |
| S477 | 2.183772505  | 5.939109880  | -2.060382443 |
| S478 | 1.521363860  | 2.277933285  | -2.936327024 |
| S479 | 3.429517098  | -2.531923171 | -3.063059849 |
| S480 | 2.721295389  | 2.595334442  | 0.324624732  |
| S481 | 0.825571226  | -1.006110740 | -1.112959923 |
| S482 | 4.690820181  | 0.636206164  | -4.960047498 |
| S483 | 4.378510186  | -2.047188798 | 0.418684135  |
| S484 | 5.011264714  | 3.460821775  | -2.347360091 |
| S485 | 6.825591495  | -1.246441830 | -2.243462066 |
| S486 | 6.291900915  | 1.208101006  | 0.558282052  |
